# Supplementary material
Source: PubMed Central journal article supplement (PMC3591659)

Scan number 8374 Raw file SKaraca\_LMB\_Forward\_H3\_121011\_10\_rep1  
 Method ITMS; CID Pepti... 164.2

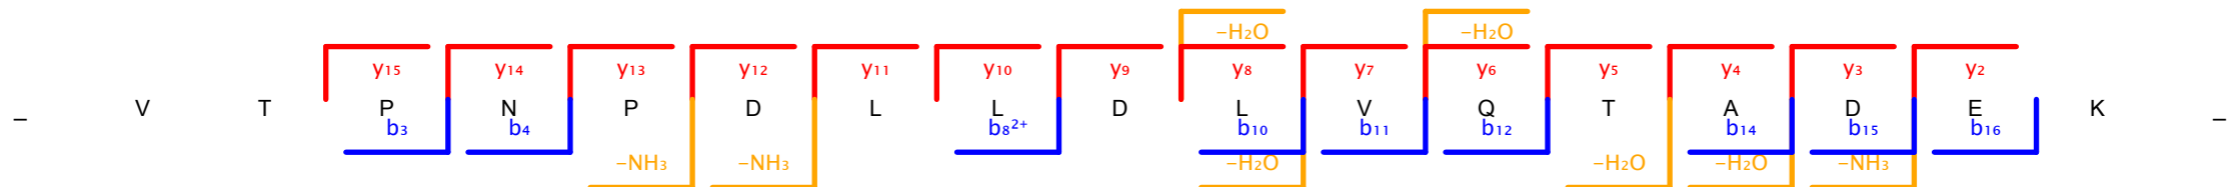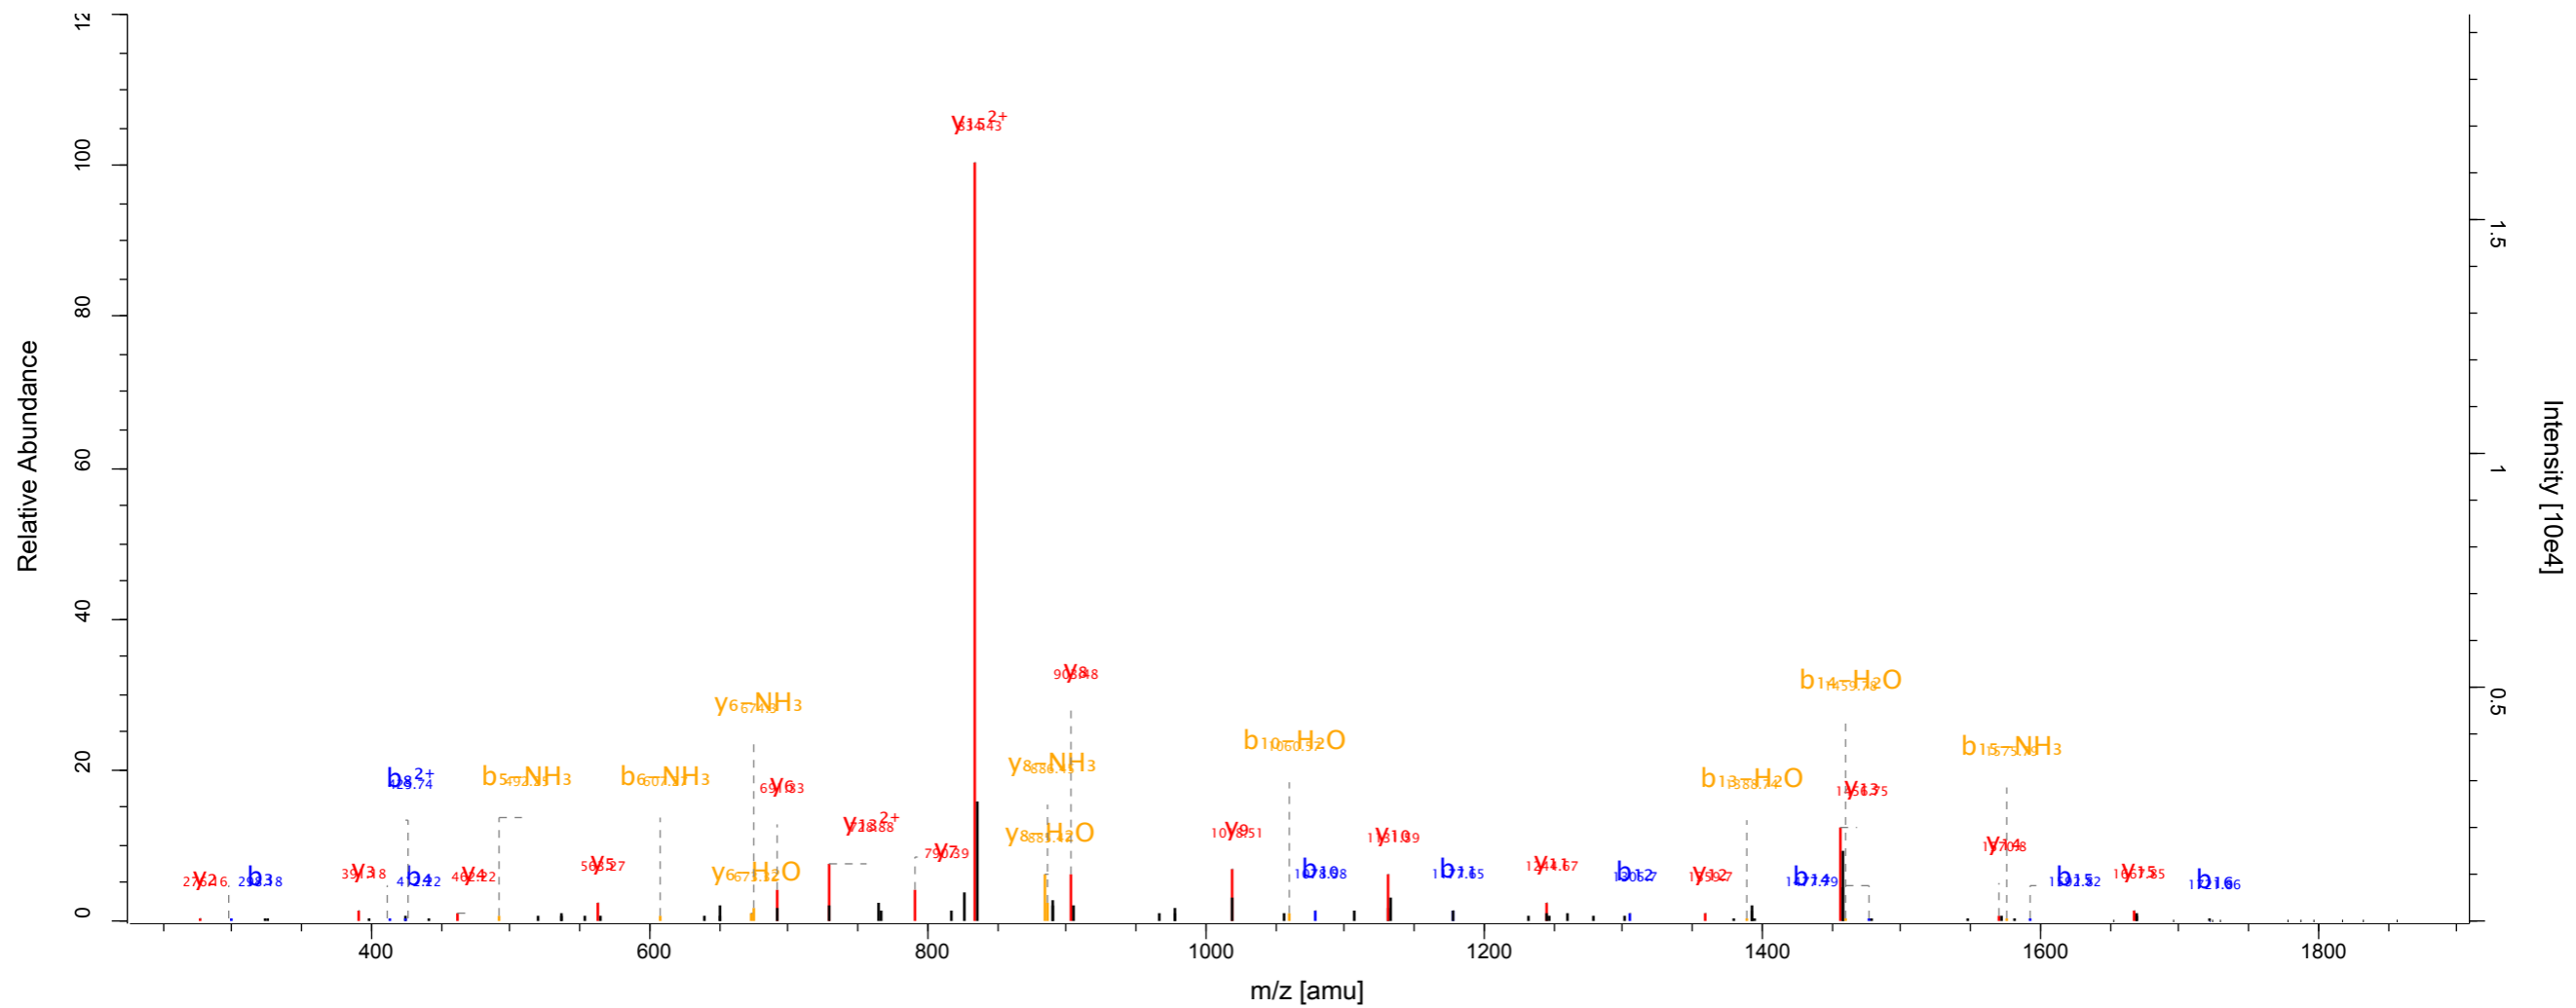

Scan number 8823 Raw file SKaraca\_LMB\_Forward\_H3\_121011\_10\_rep1  
 Method ITMS; CID Pepti... 147.7

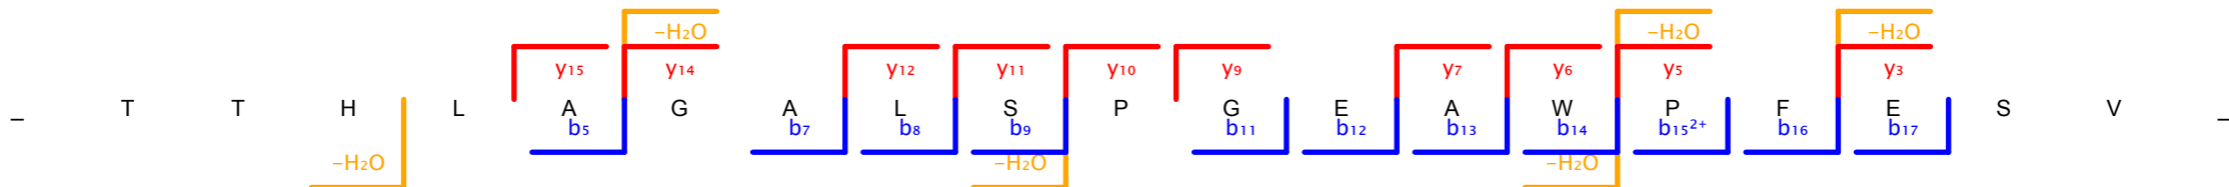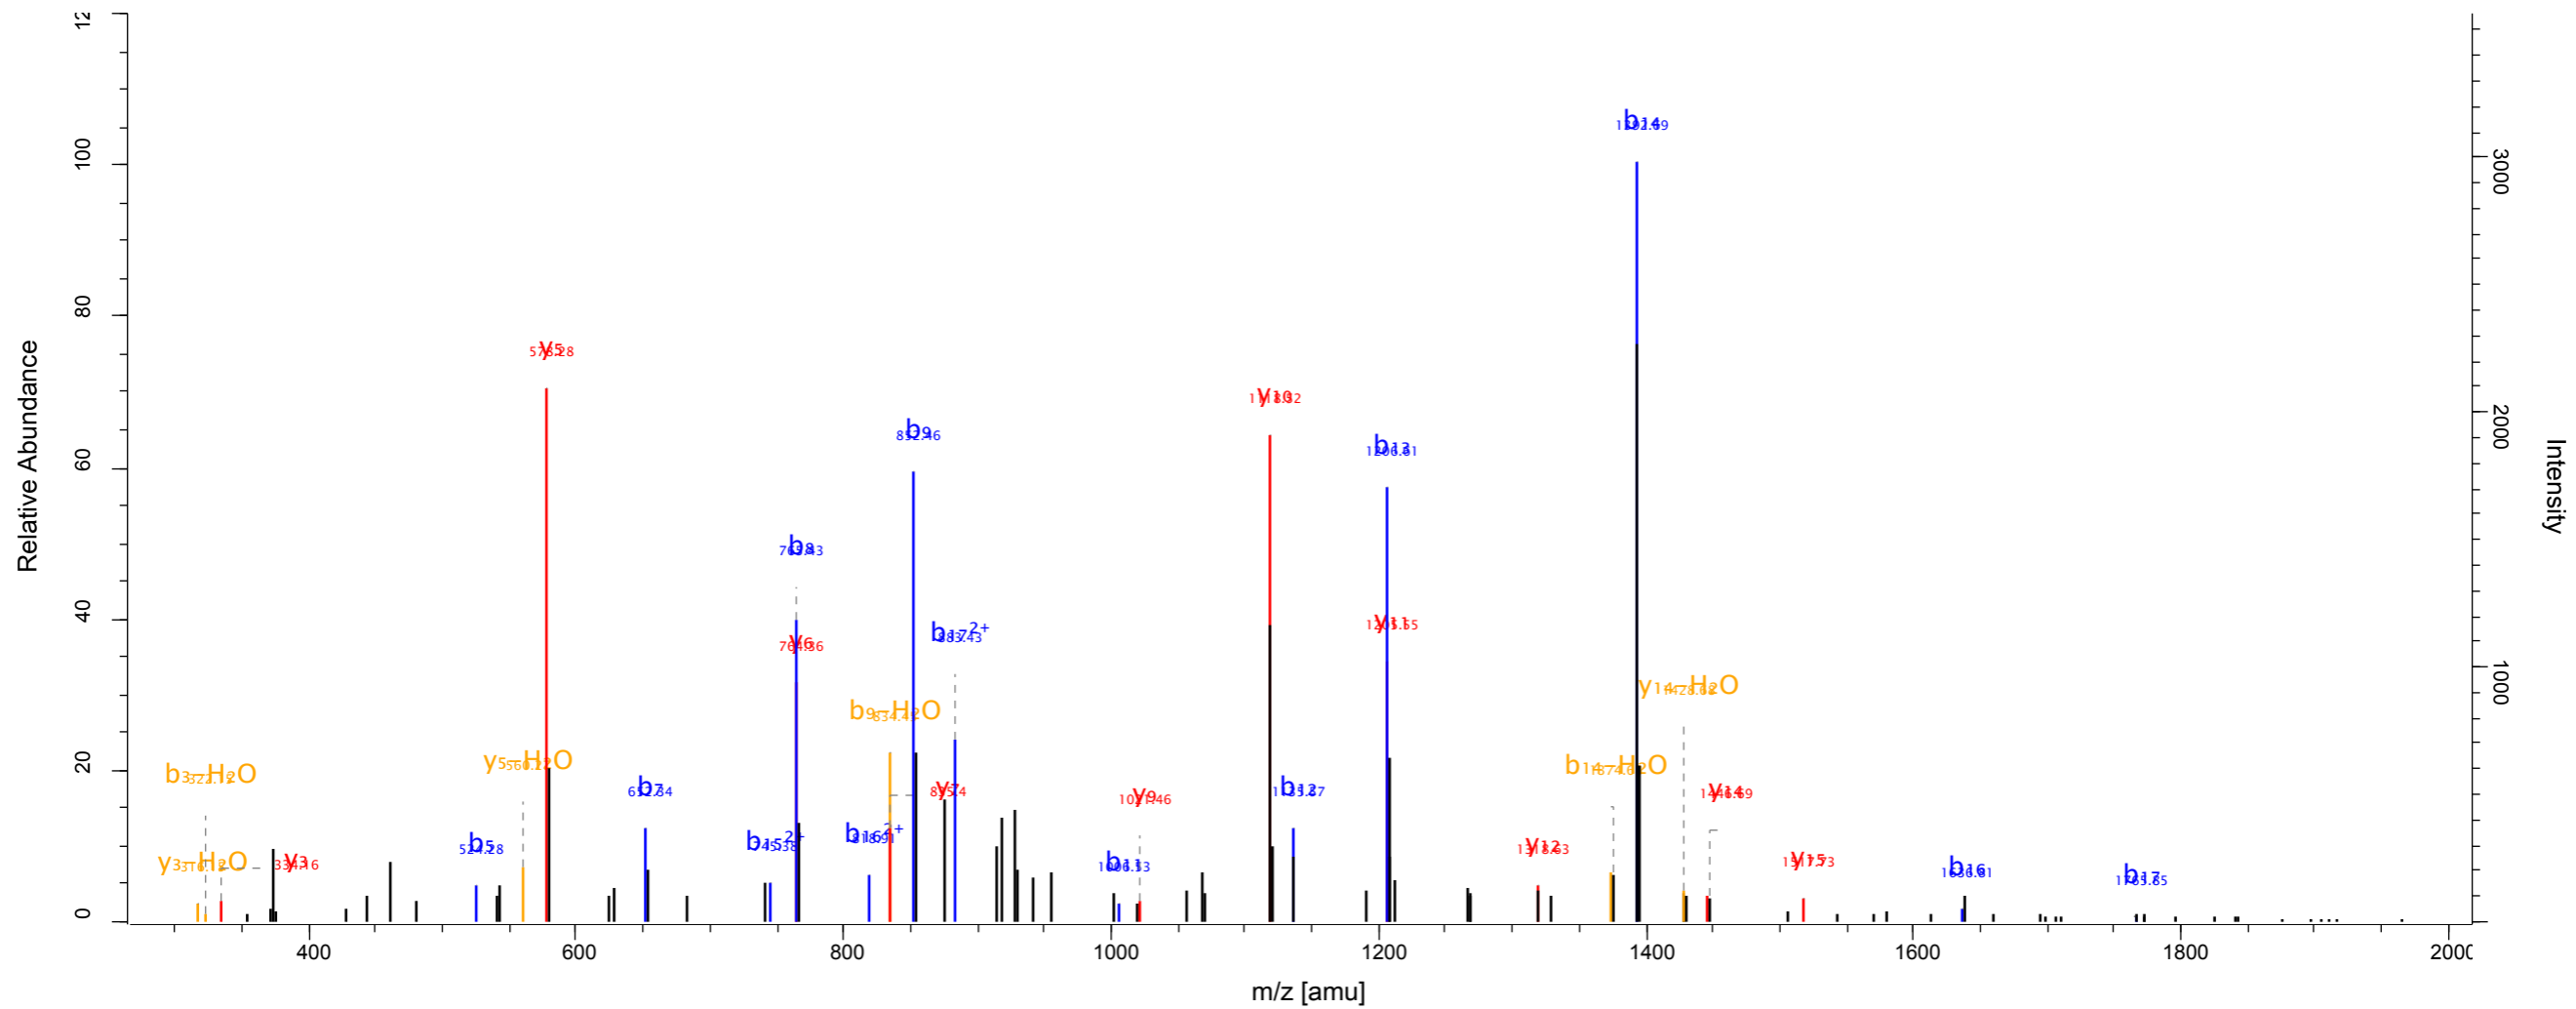

Scan number 8409 Raw file SKaraca\_LMB\_Forward\_H3\_121011\_10\_rep2  
Method ITMS; CID Pepti... 119.87

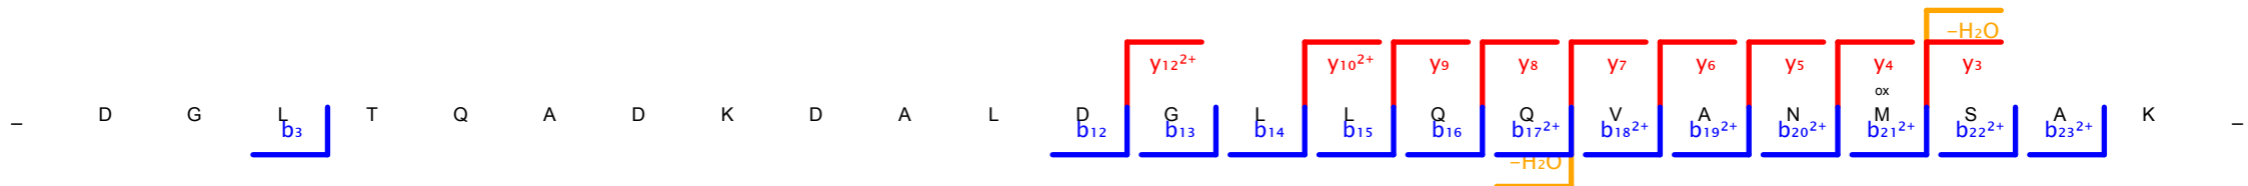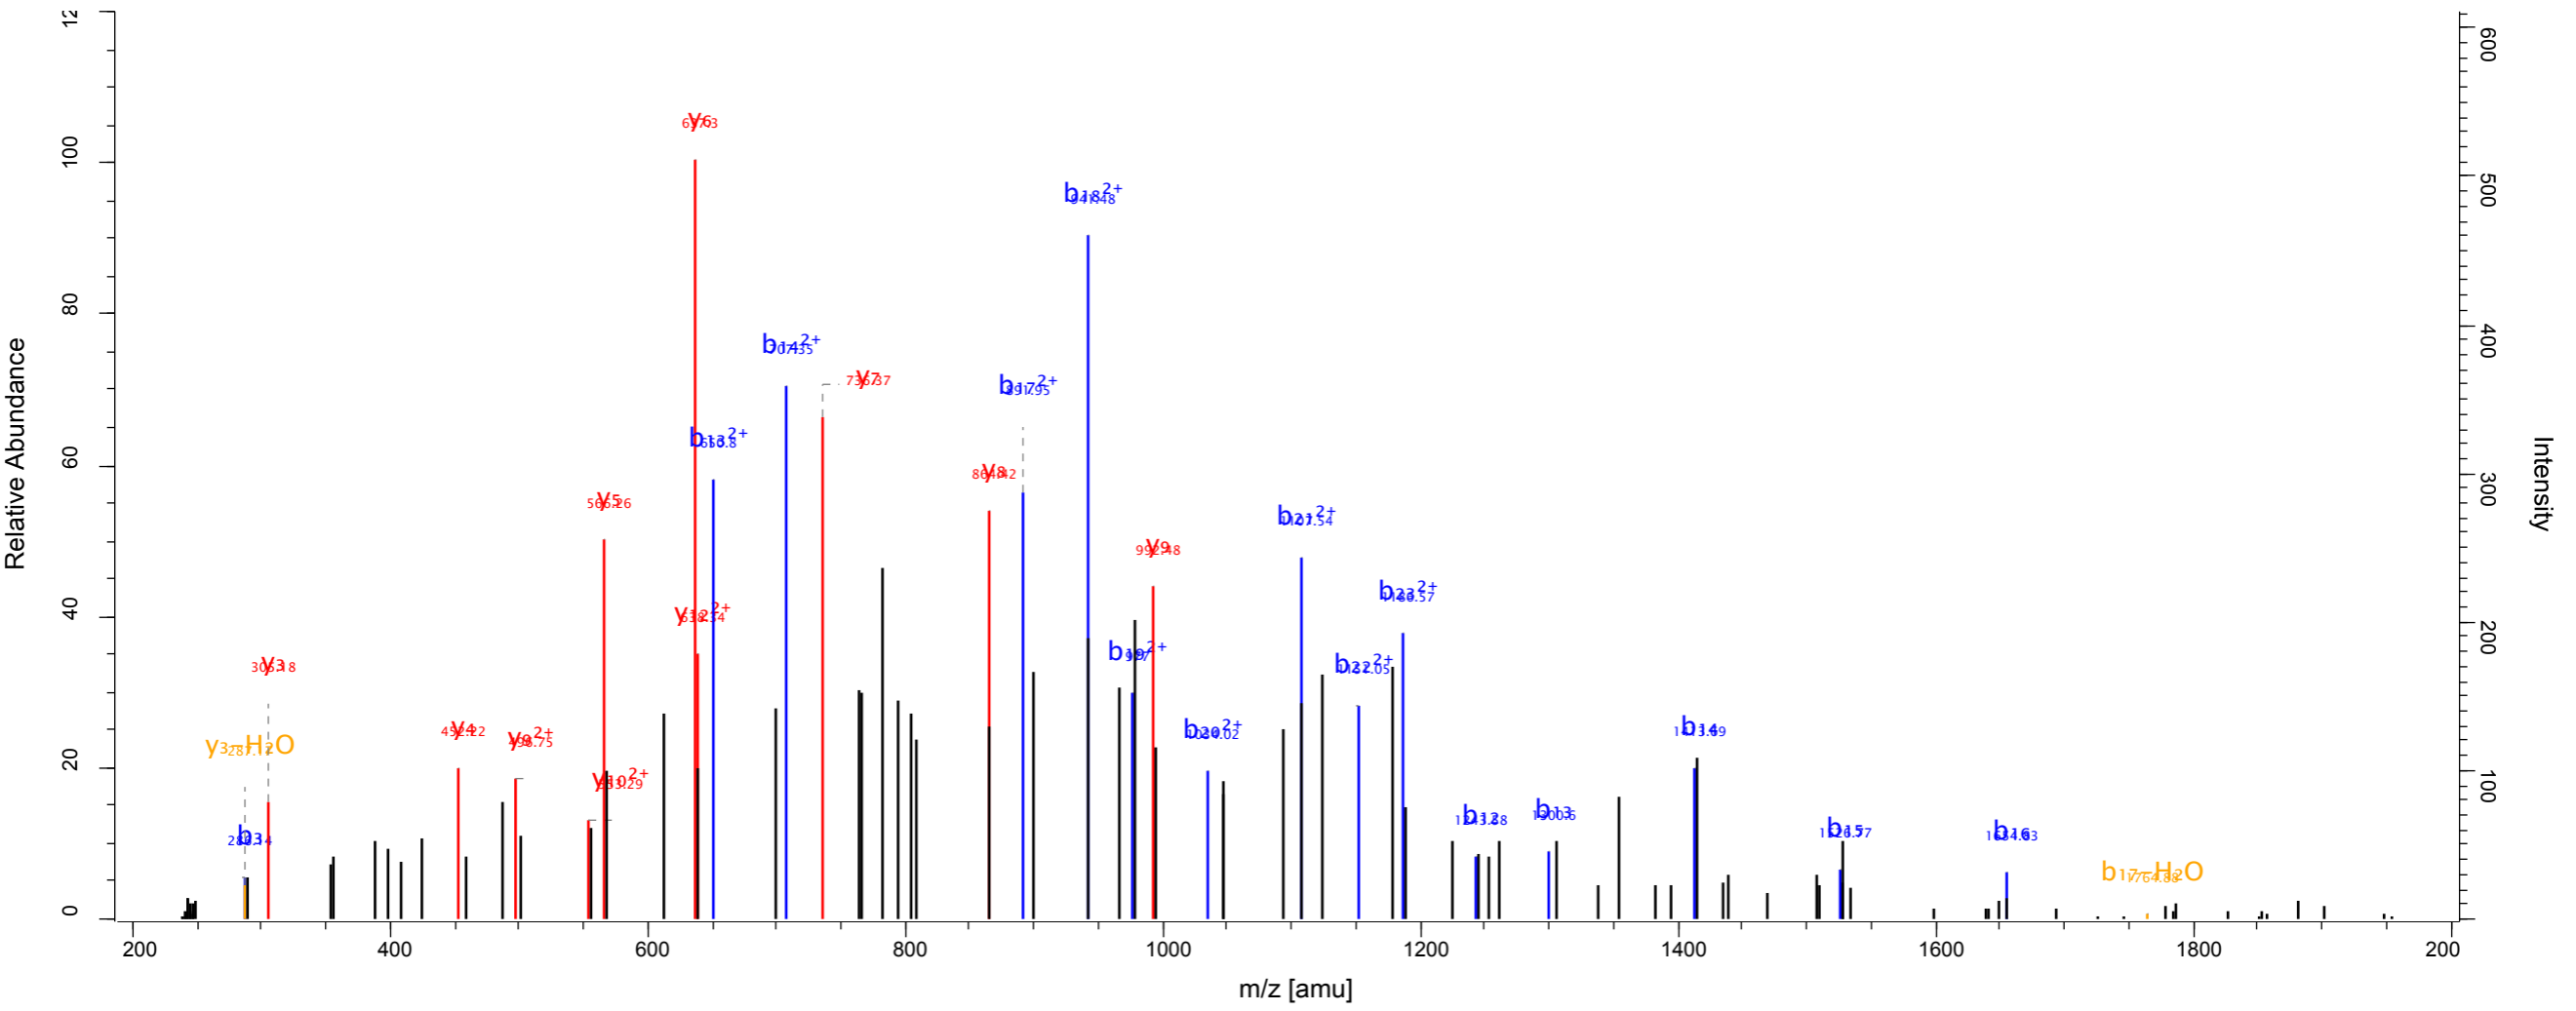

Scan number 7775 Raw file SKaraca\_LMB\_Forward\_H3\_121011\_11\_rep1  
 Method ITMS; CID Pepti... 143.94

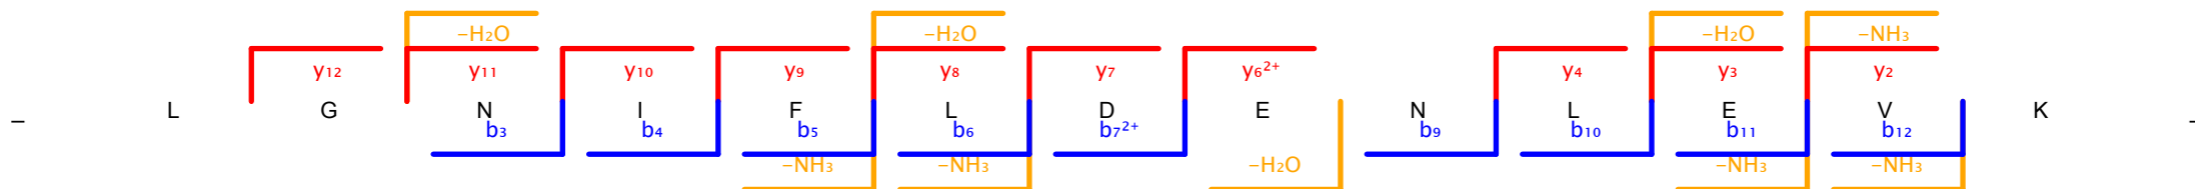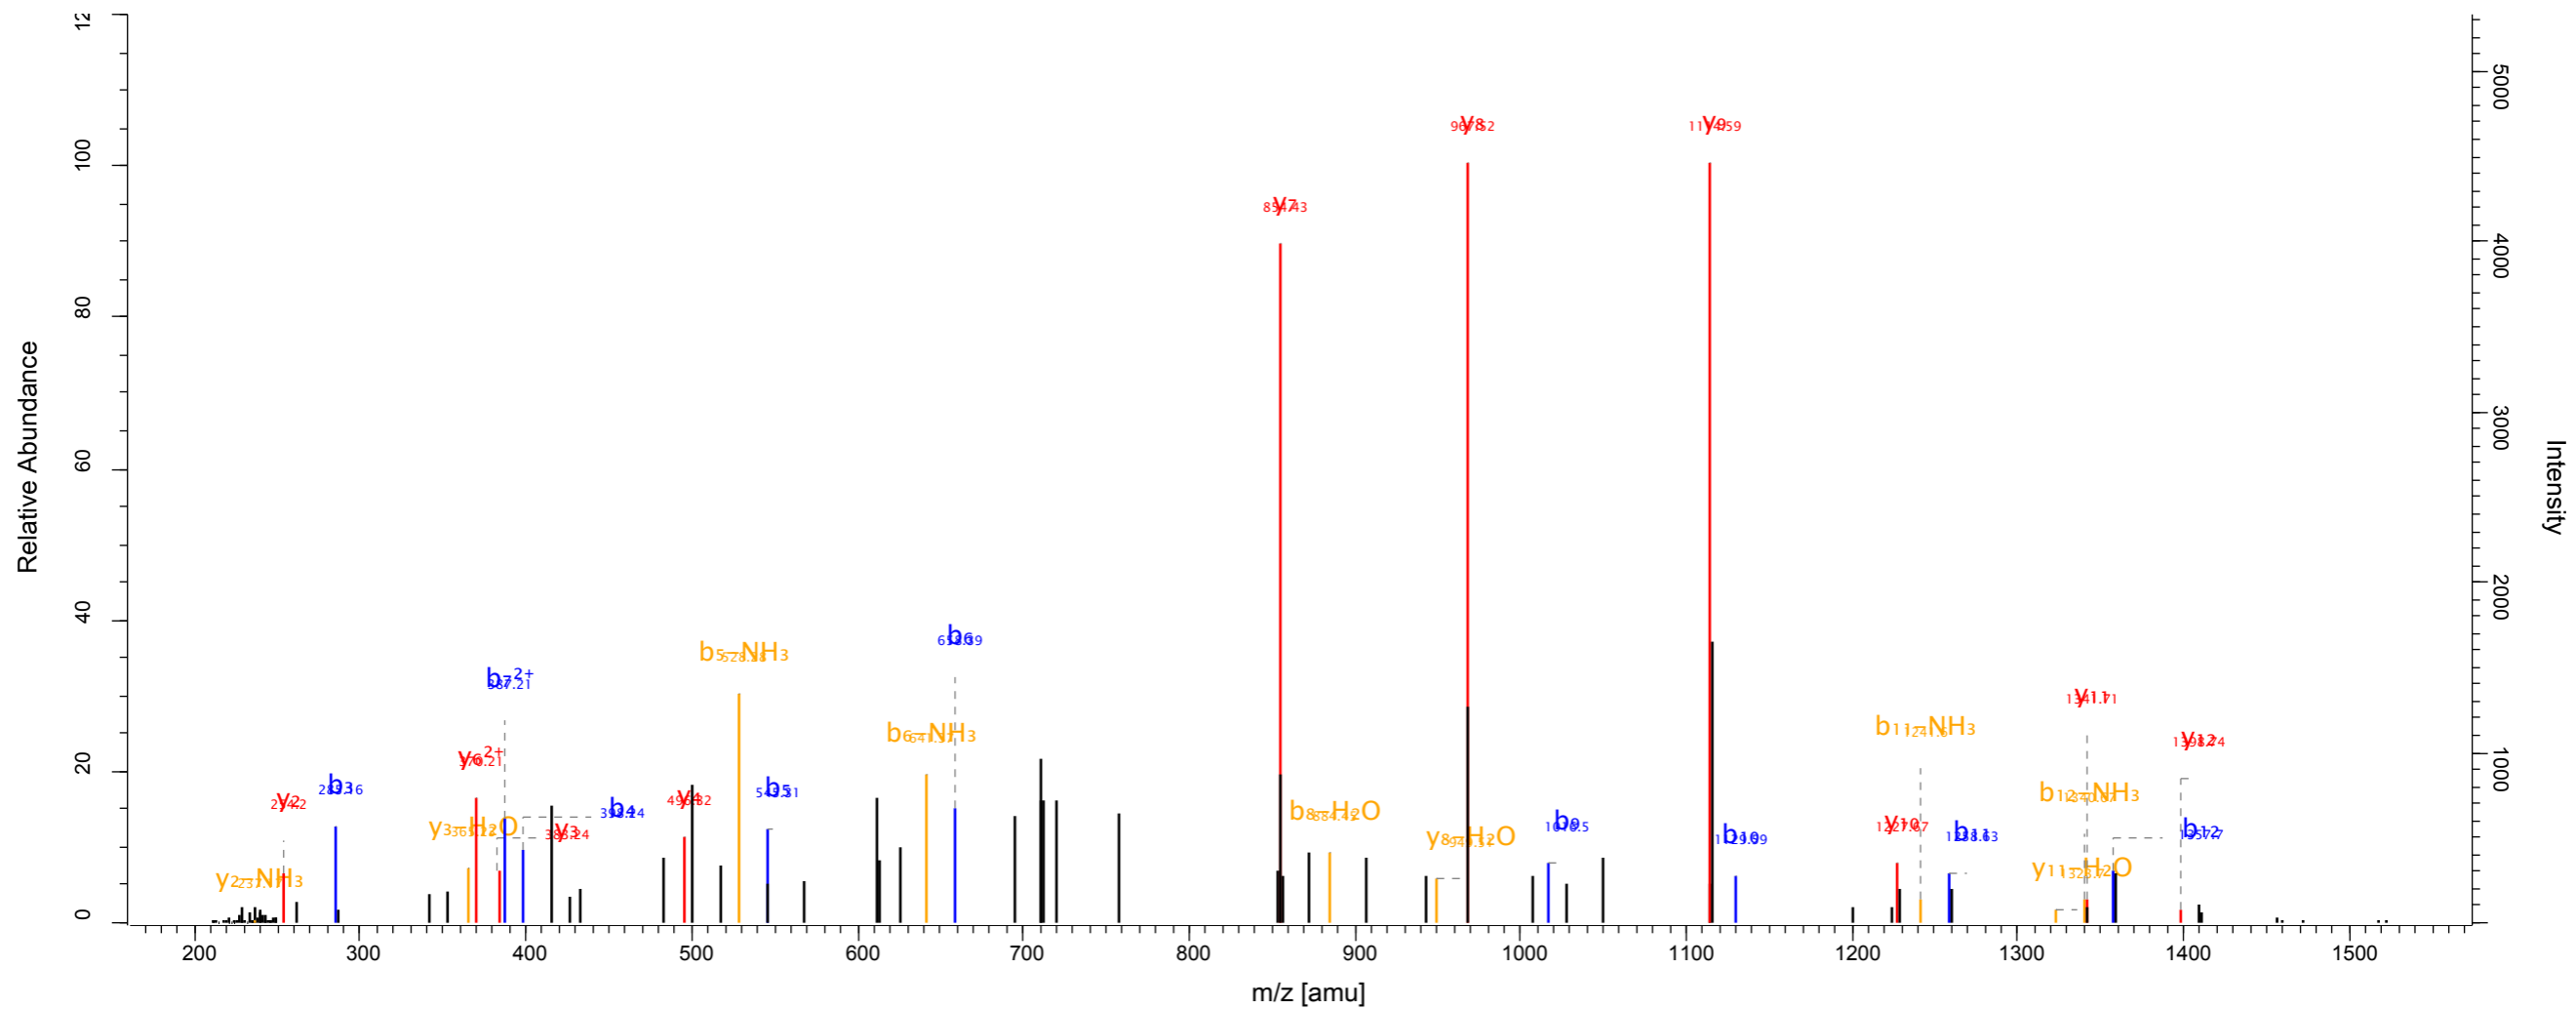

Scan number 9581 Raw file SKaraca\_LMB\_Forward\_H3\_121011\_12\_rep1  
 Method ITMS; CID Pepti... 128.14

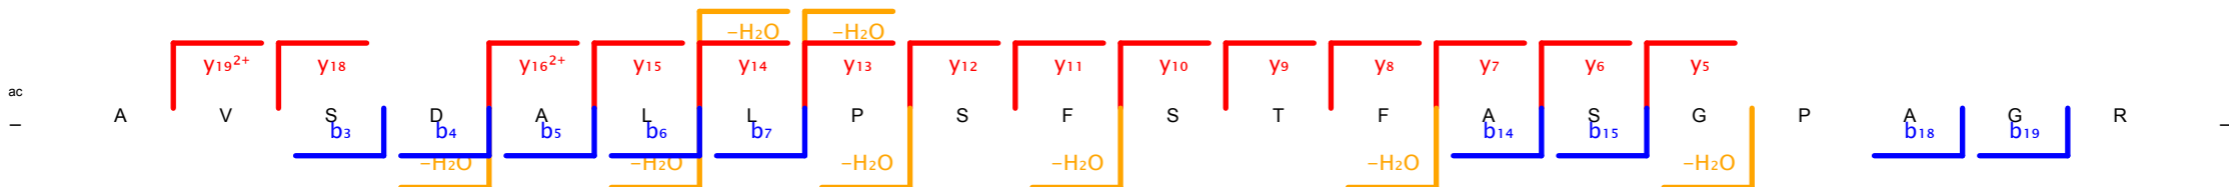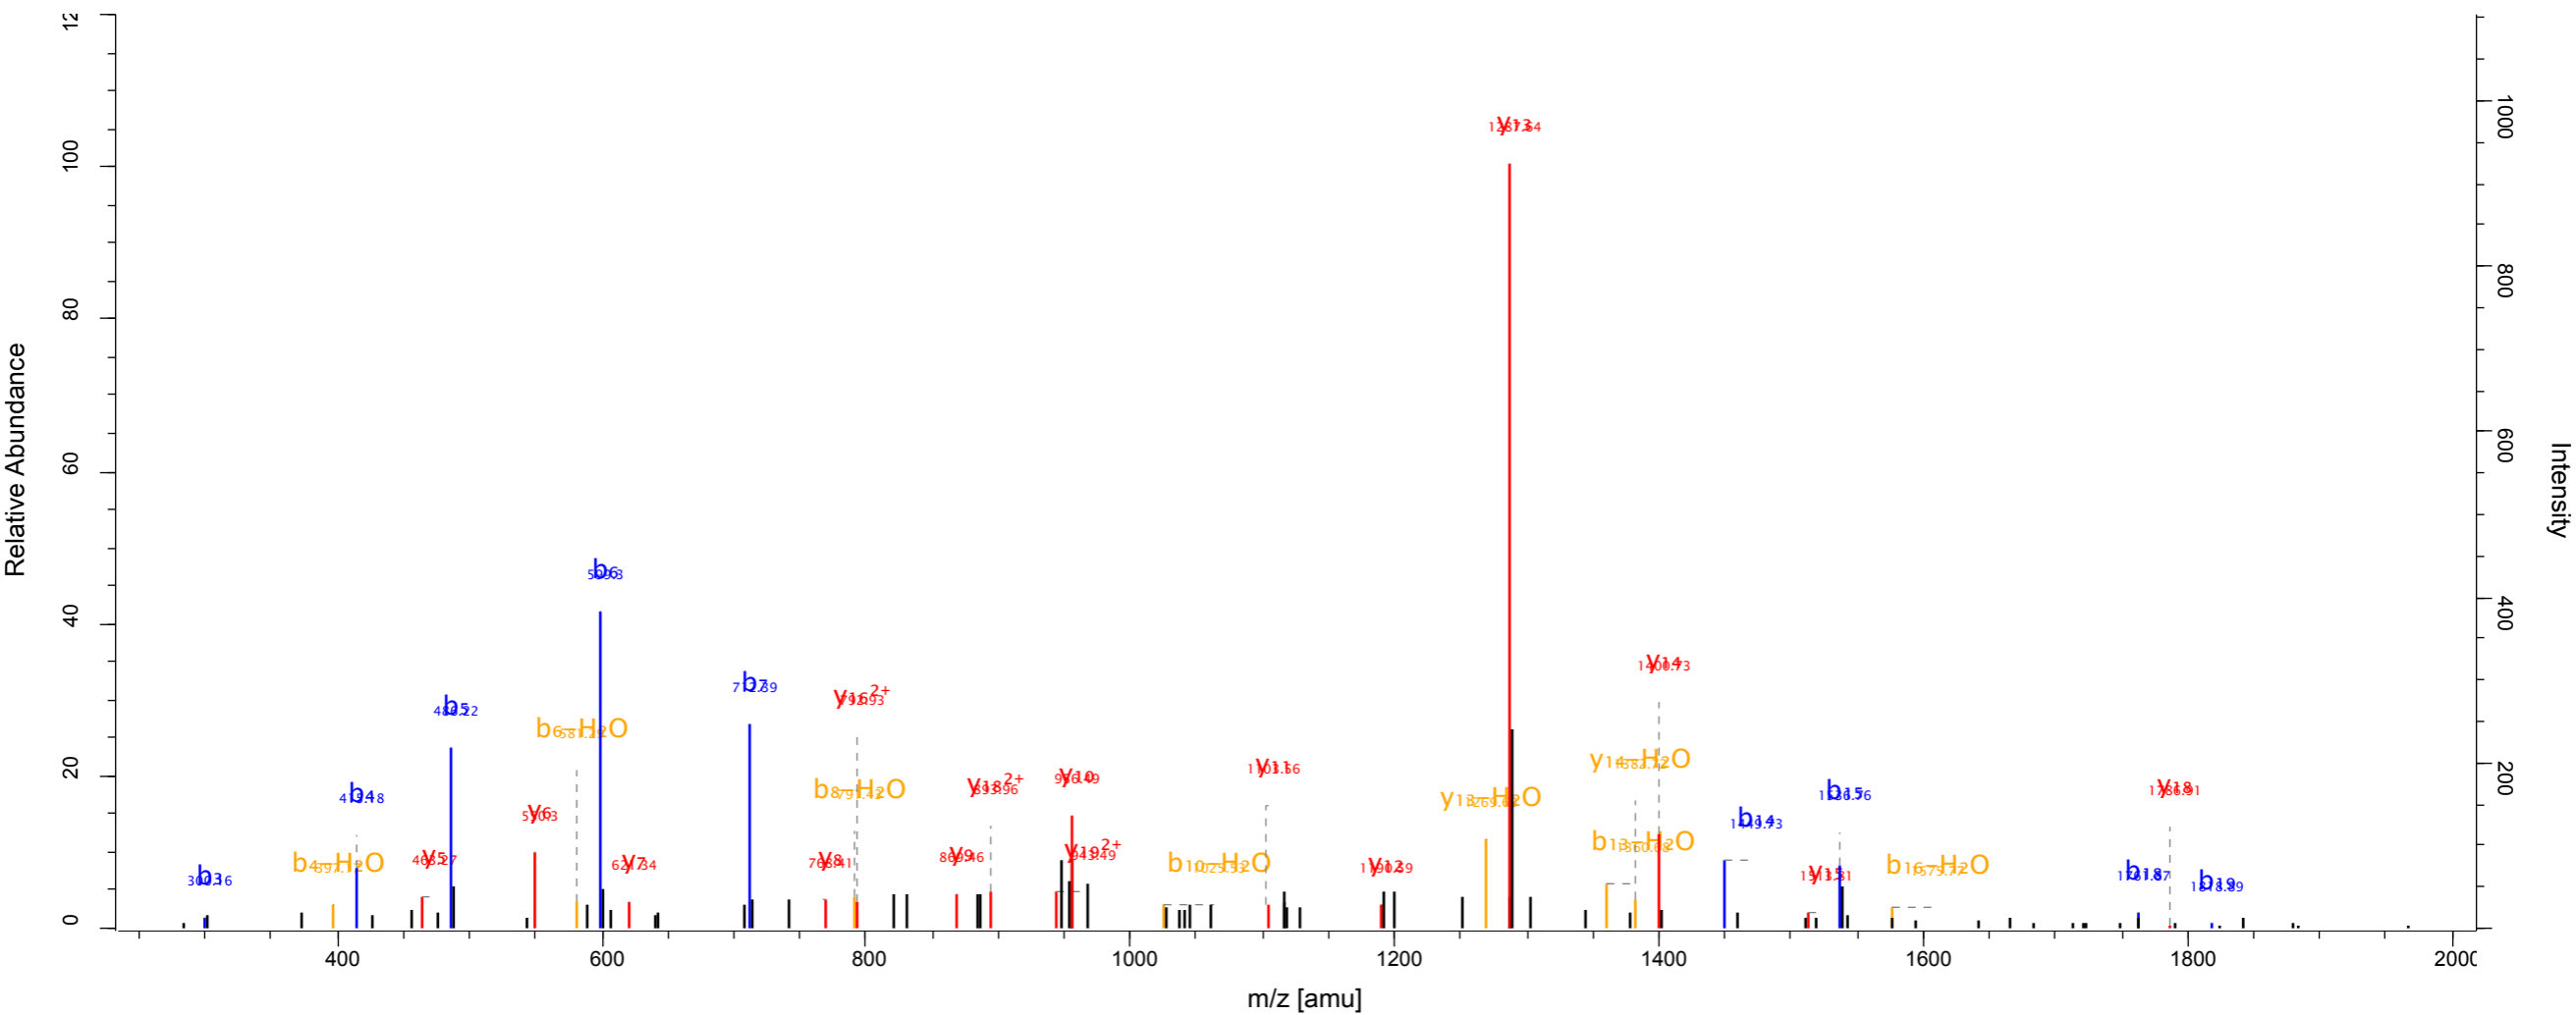

Scan number 4650 Raw file SKaraca\_LMB\_Forward\_H3\_121011\_13\_rep1  
 Method ITMS; CID Pepti... 115.57

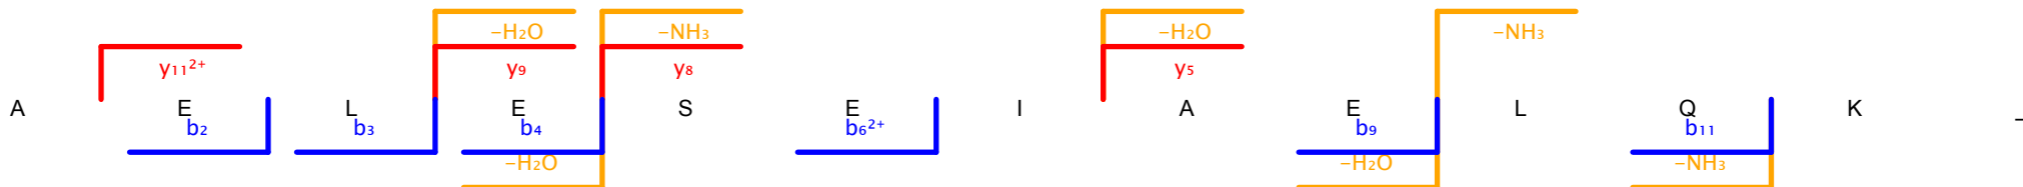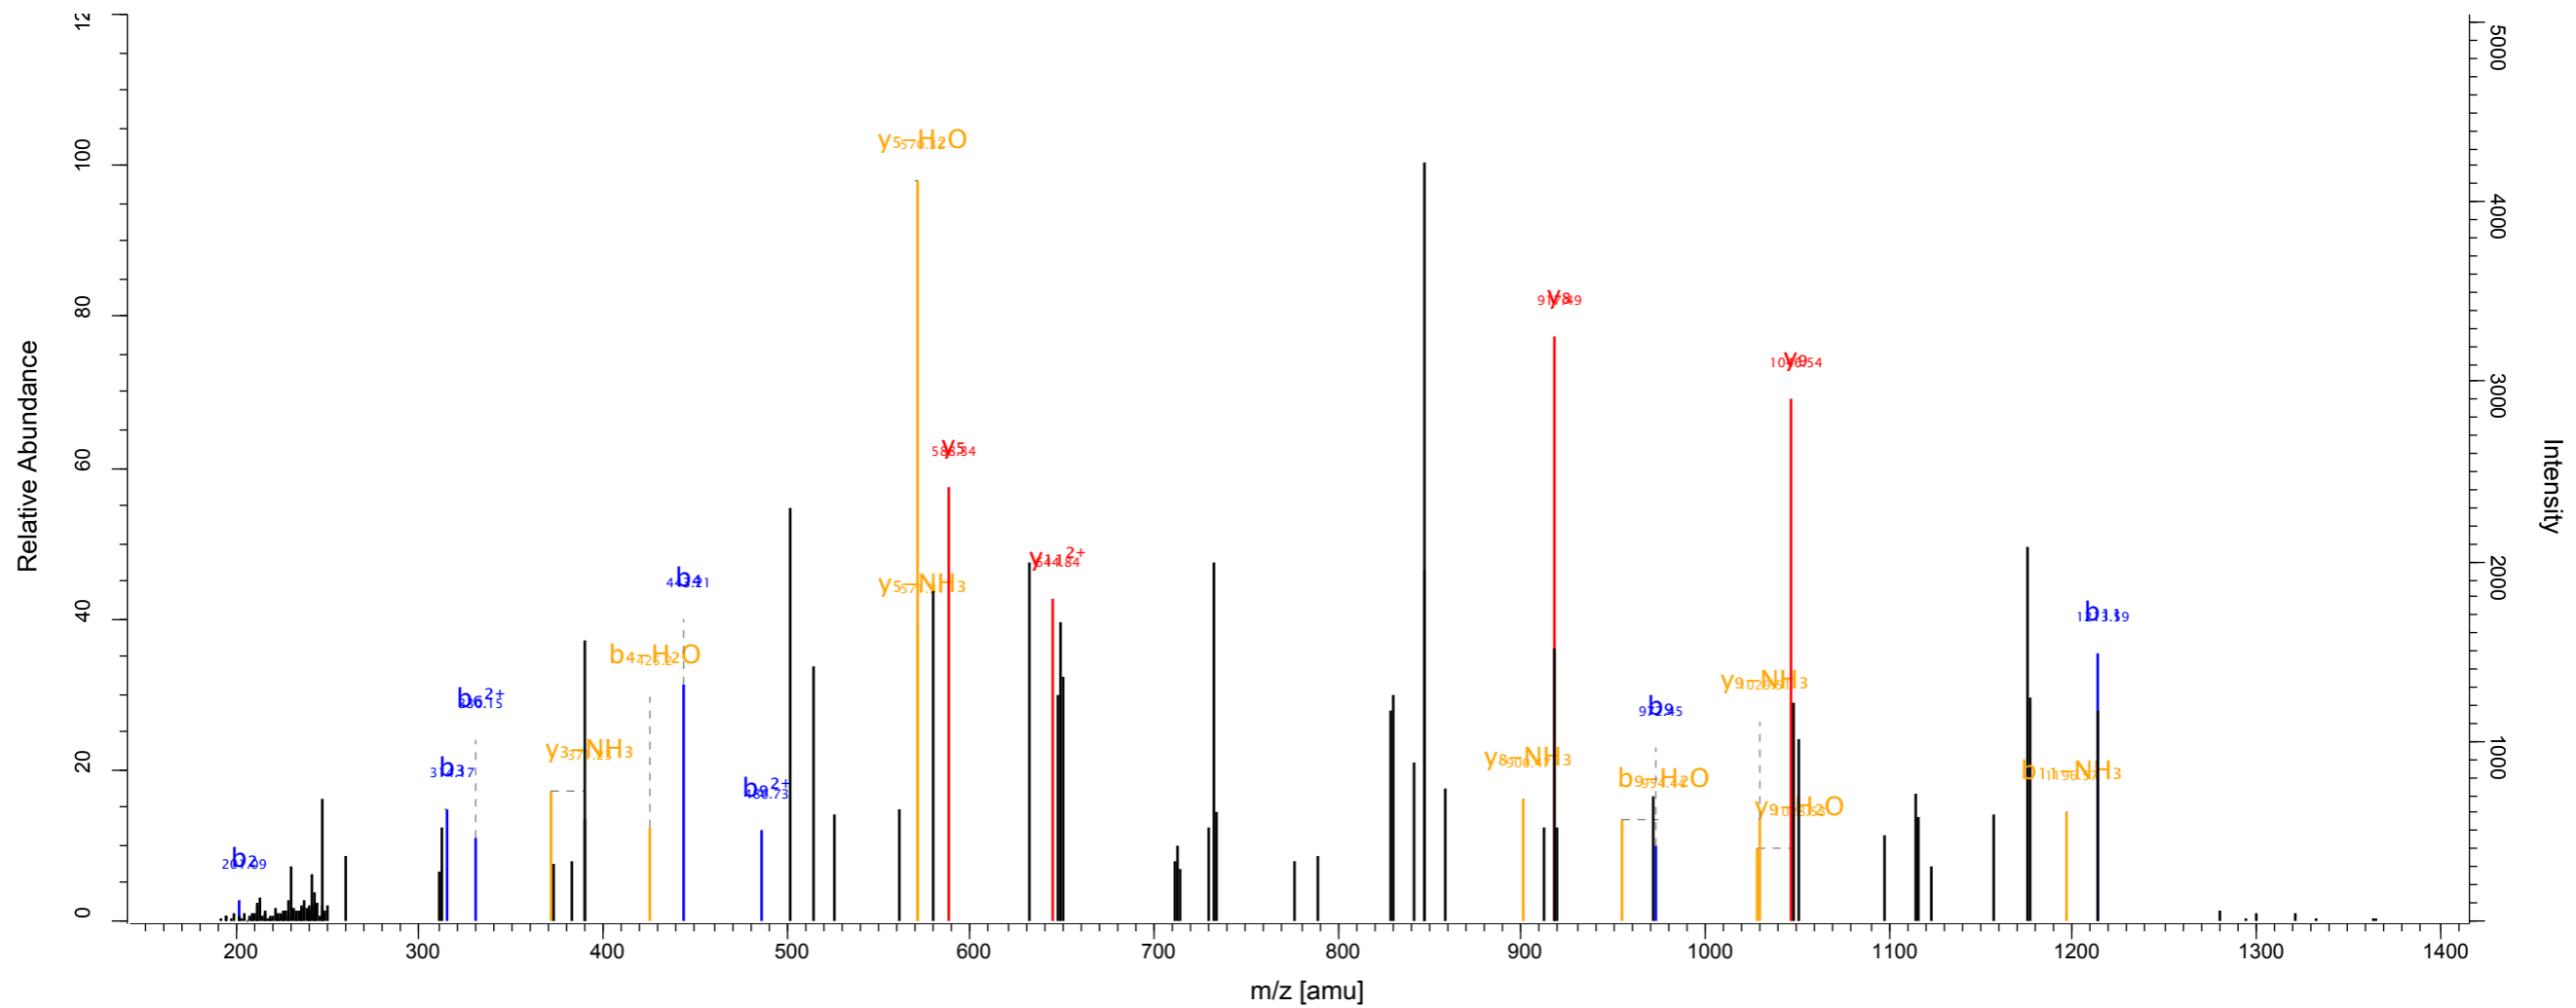

Scan number 8658 Raw file SKaraca\_LMB\_Forward\_H3\_121011\_13\_rep1  
 Method ITMS; CID Pepti... 128.74

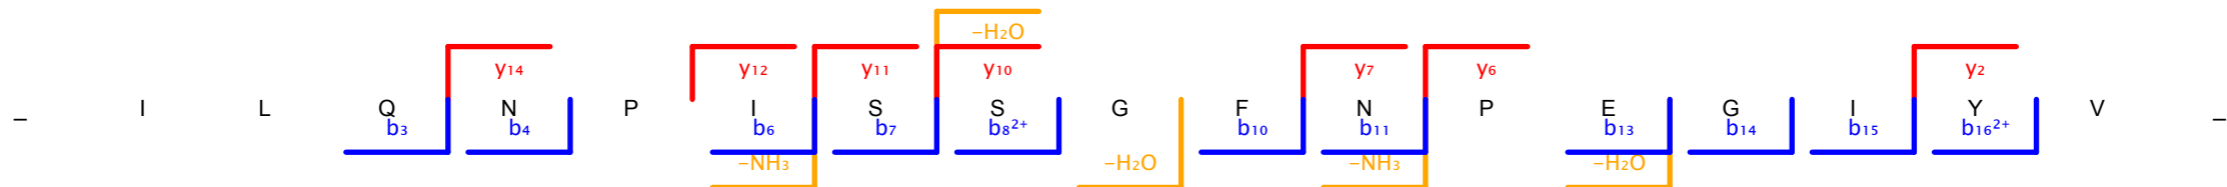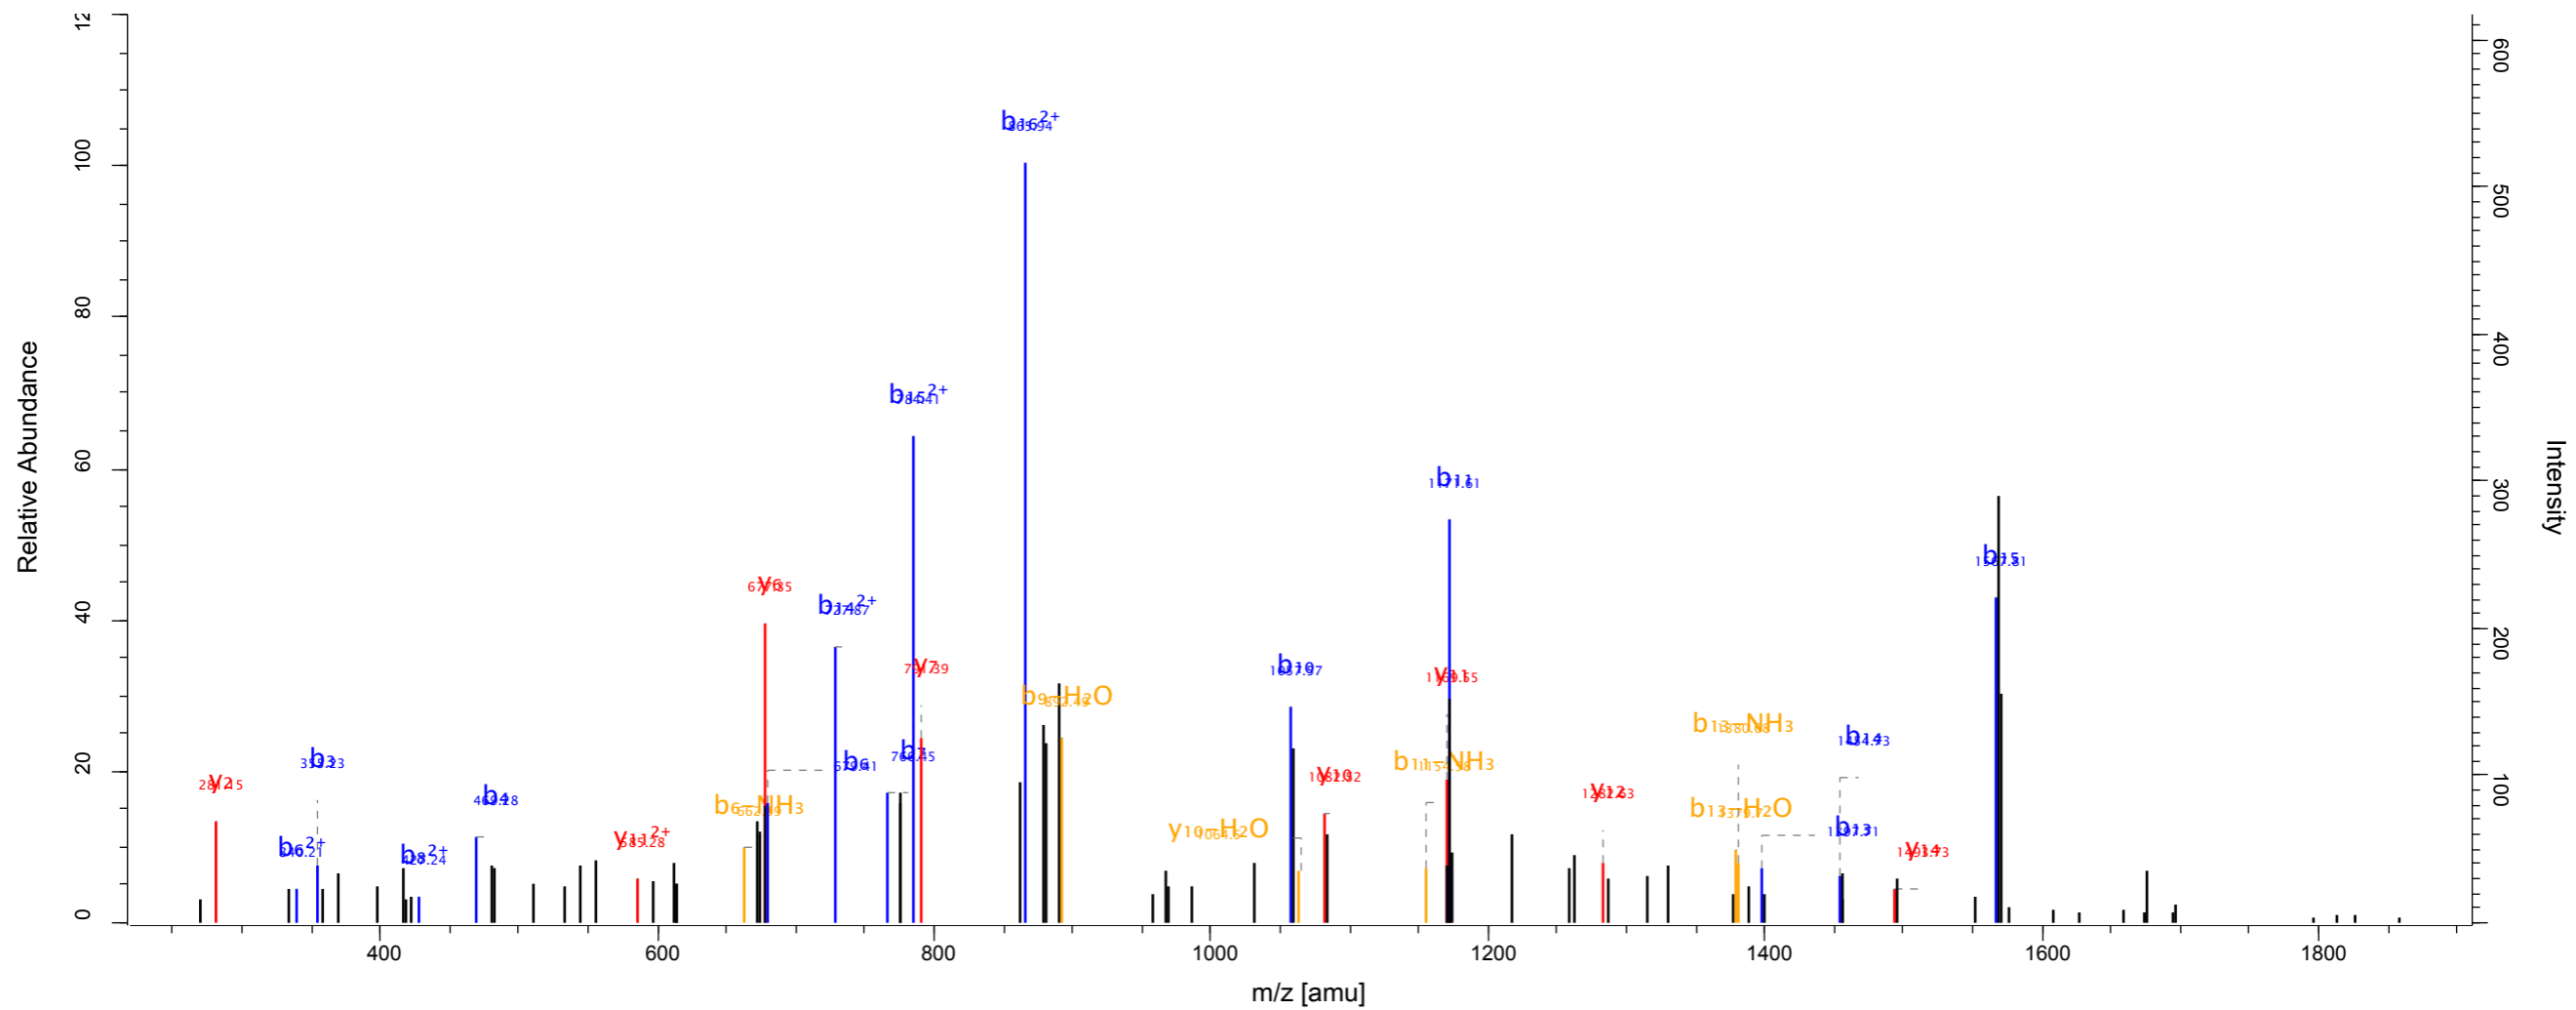

Scan number 1147 Raw file SKaraca\_LMB\_Forward\_H3\_121011\_16\_rep1  
 Method ITMS; CID Pepti... 128.86

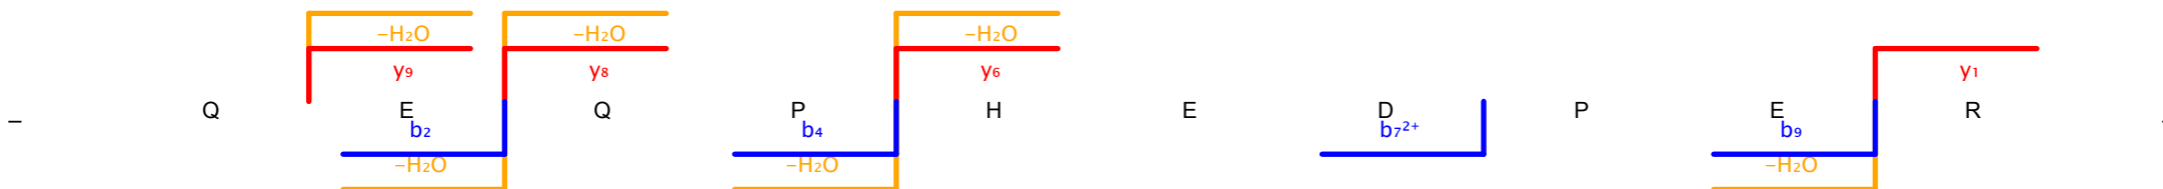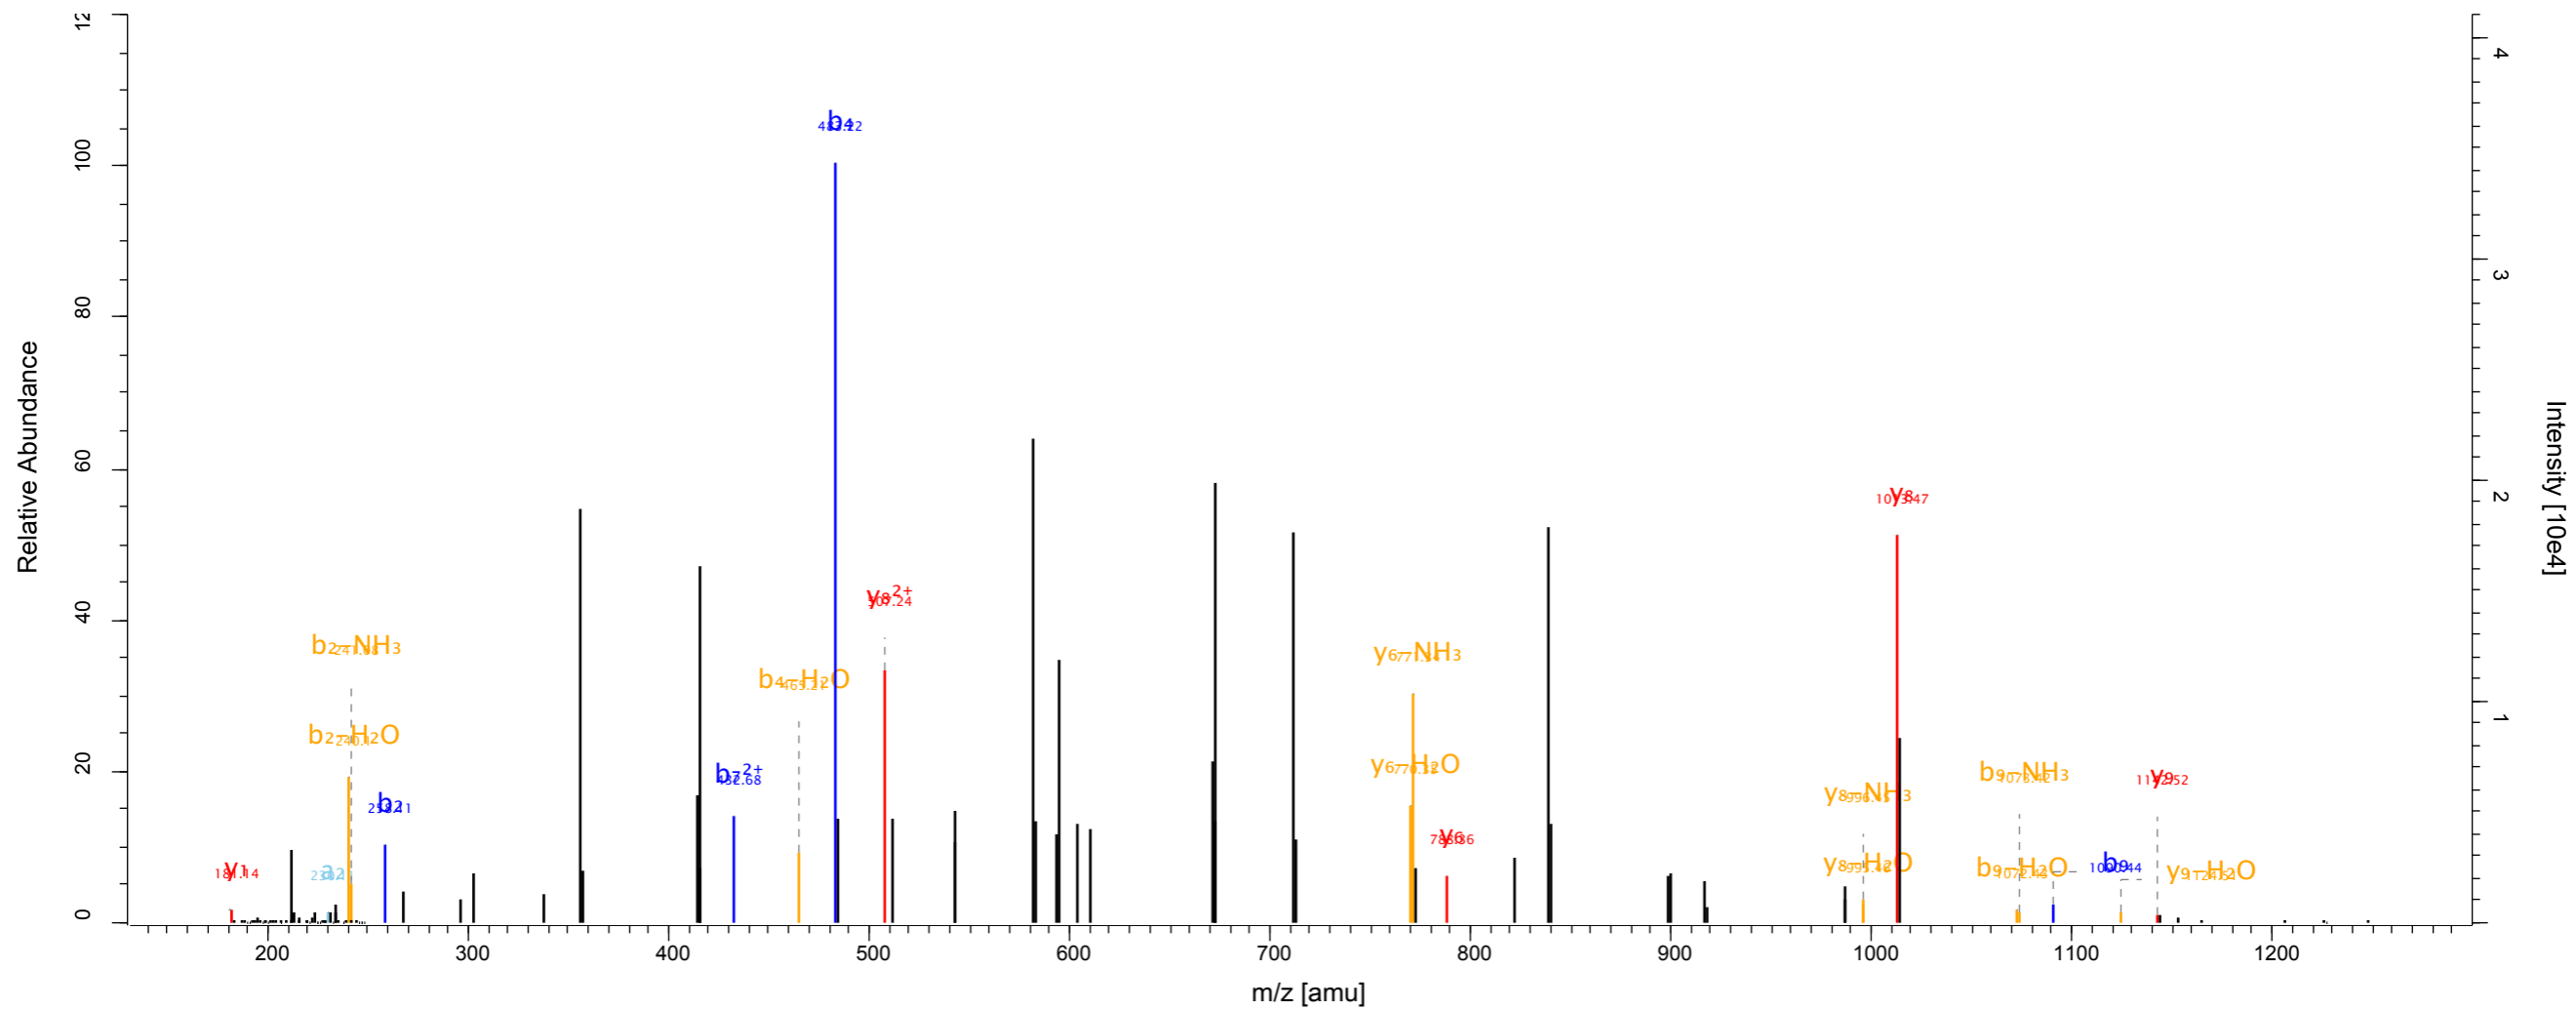



|             |           |          |                                       |
|-------------|-----------|----------|---------------------------------------|
| Scan number | 8504      | Raw file | SKaraca_LMB_Forward_H3_121011_16_rep1 |
| Method      | ITMS; CID | Pepti... | 122.33                                |

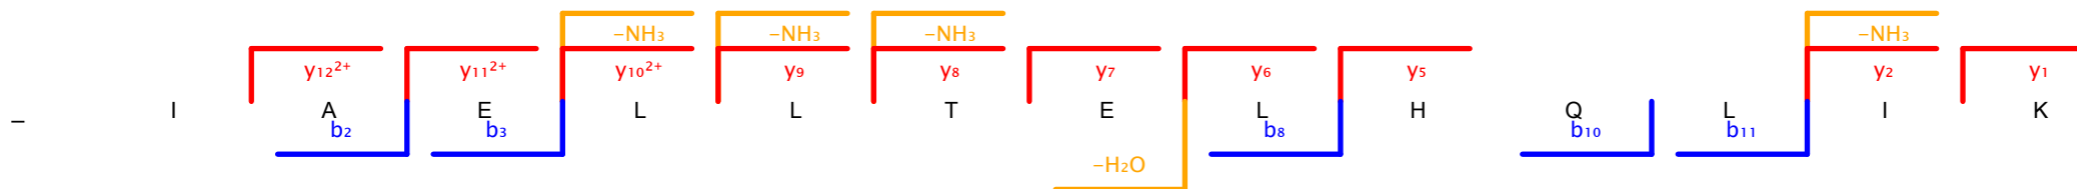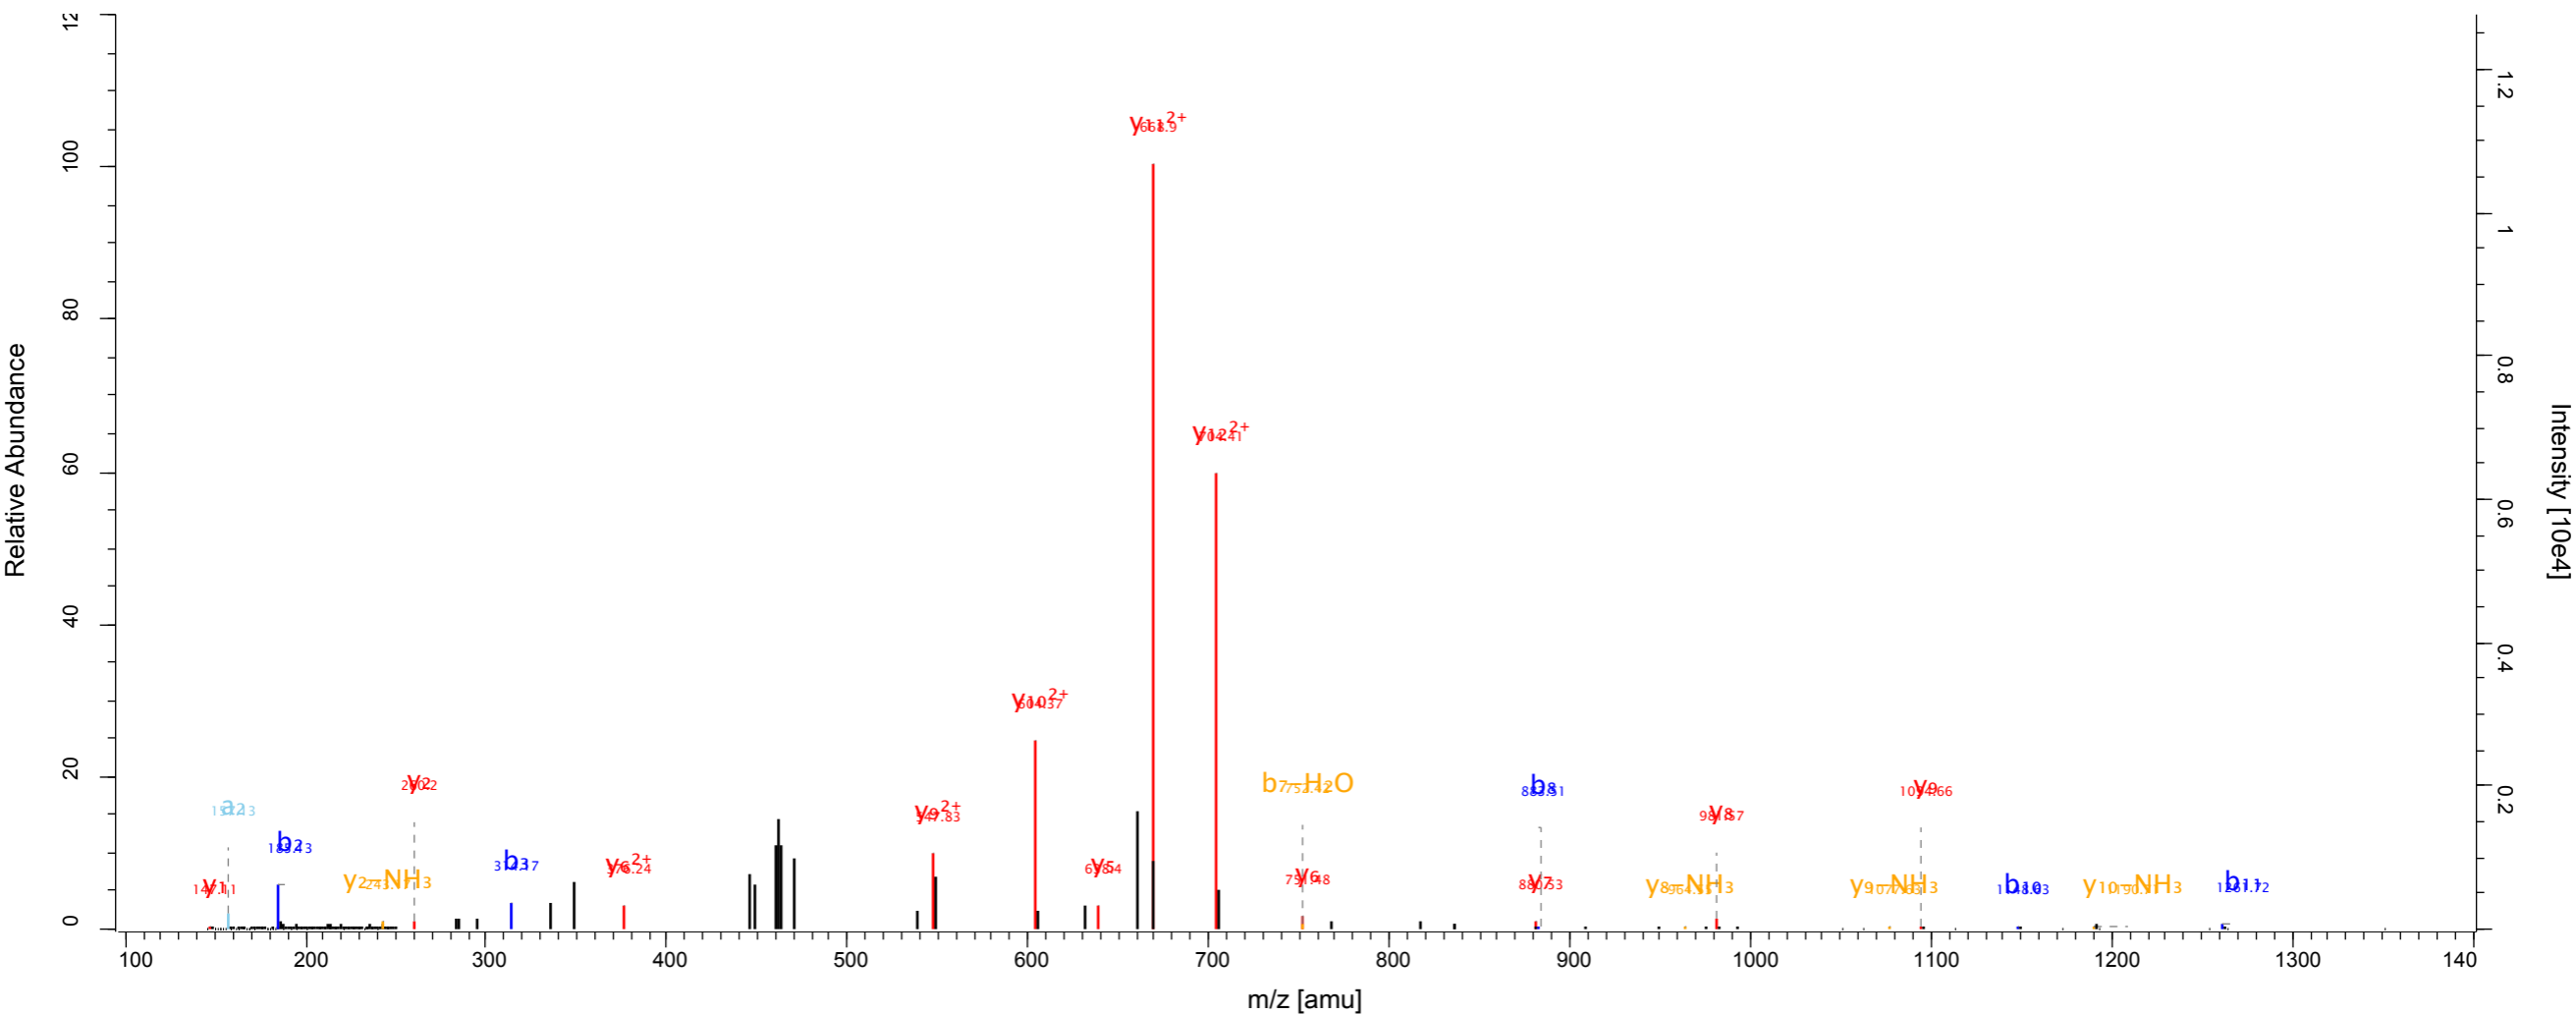

Scan number 7586 Raw file SKaraca\_LMB\_Forward\_H3\_121011\_17\_rep1  
Method ITMS; CID Pepti... 105.14

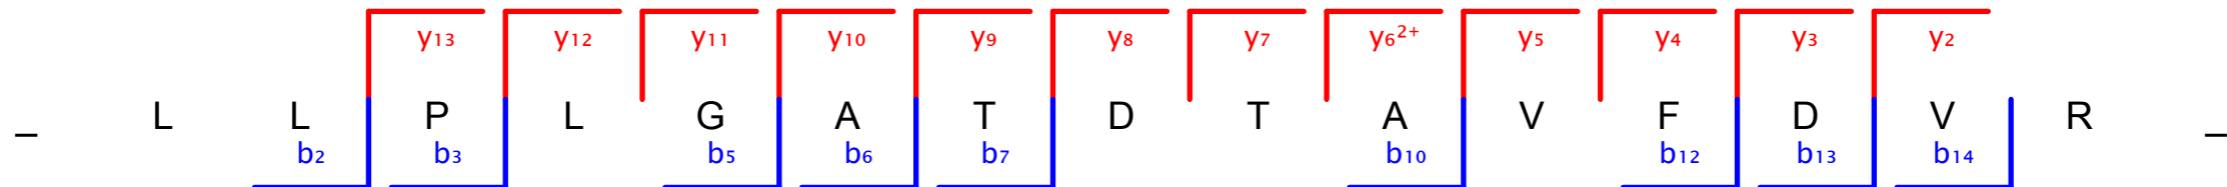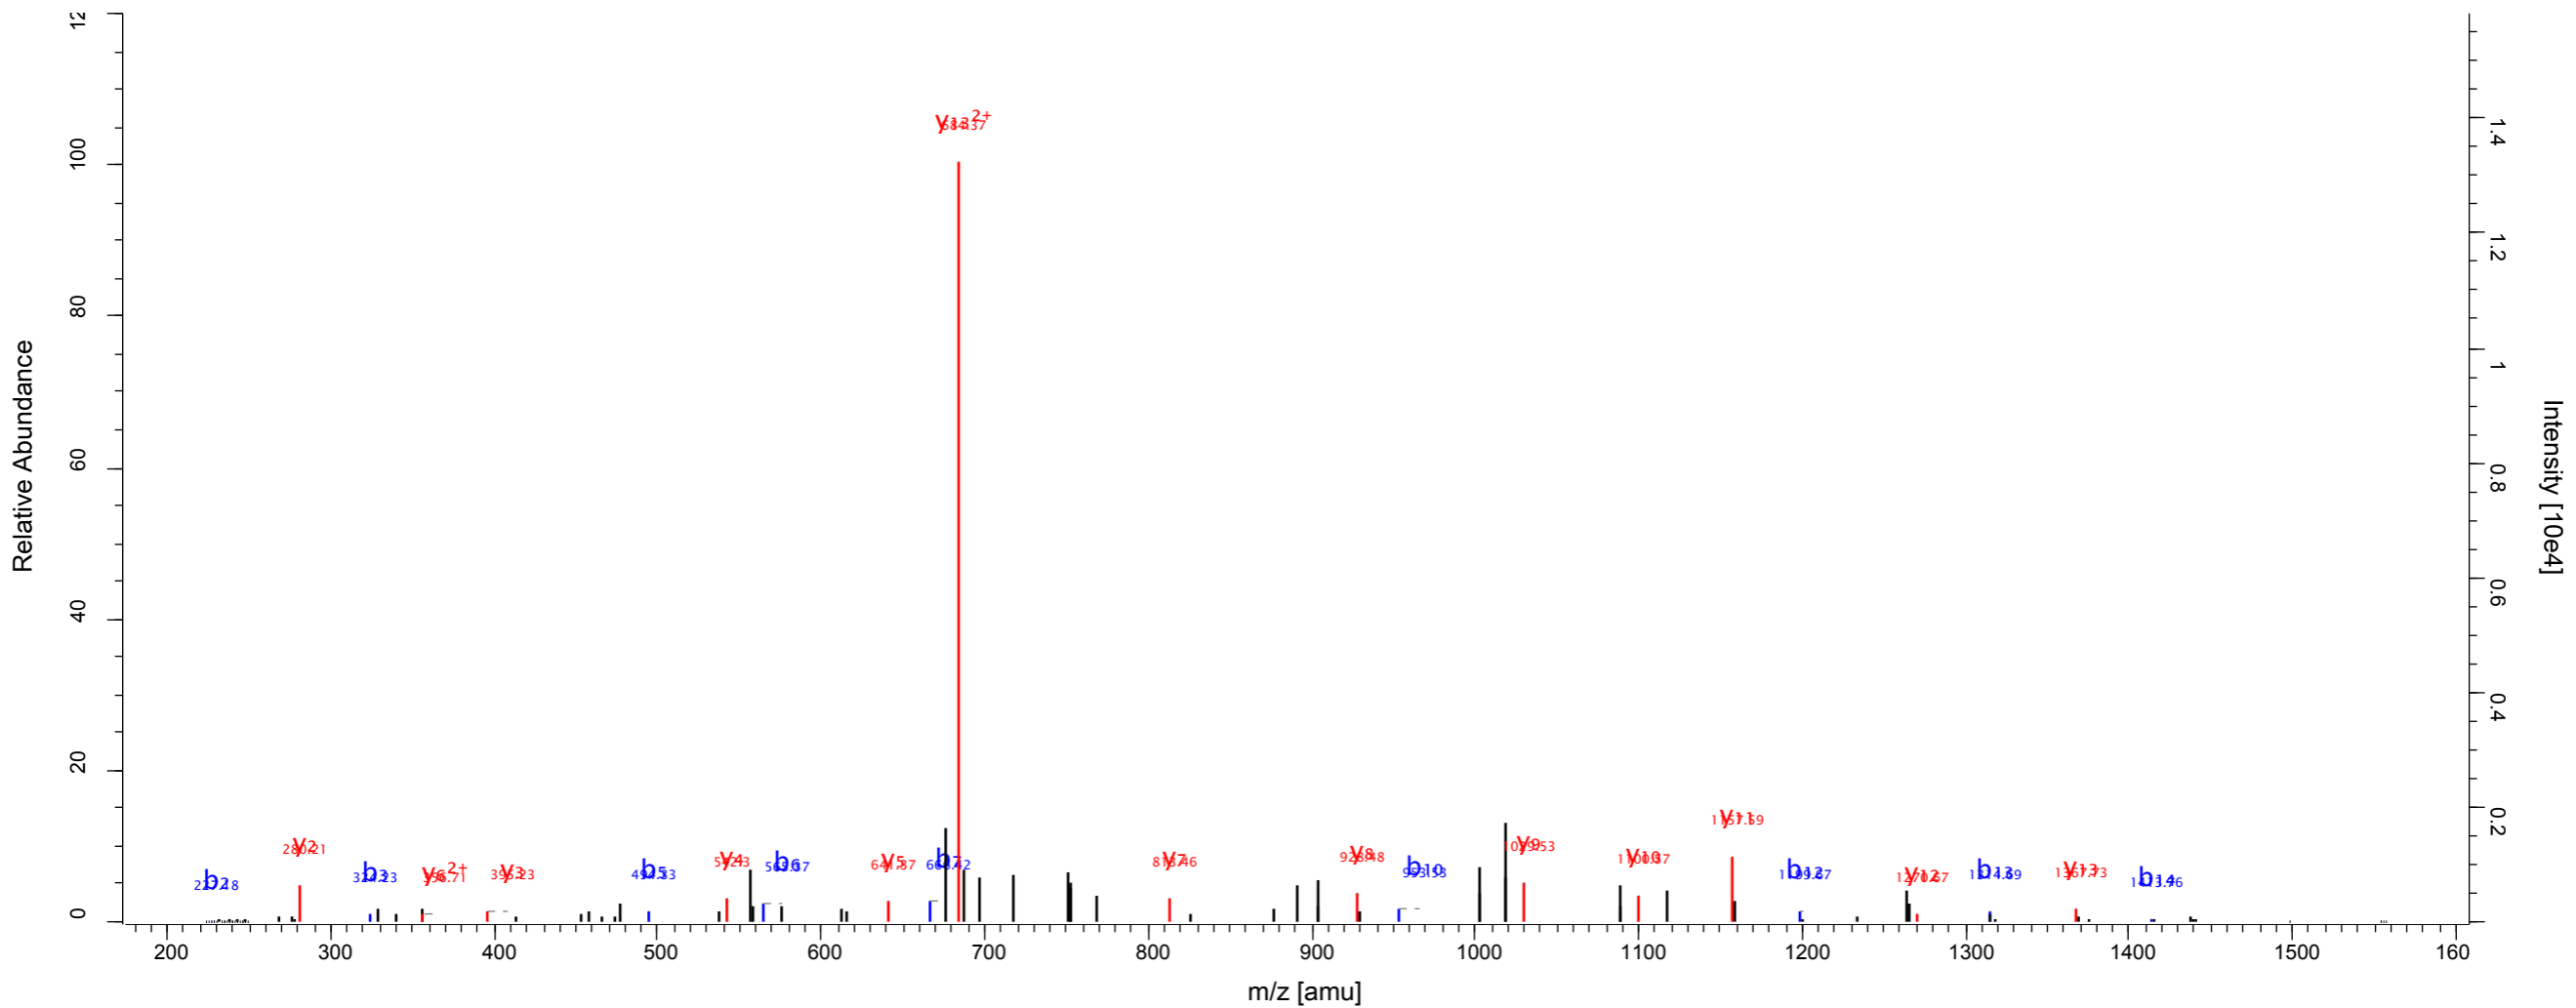

|             |           |          |                                       |
|-------------|-----------|----------|---------------------------------------|
| Scan number | 3627      | Raw file | SKaraca_LMB_Forward_H3_121011_18_rep1 |
| Method      | ITMS; CID | Pepti... | 232.82                                |

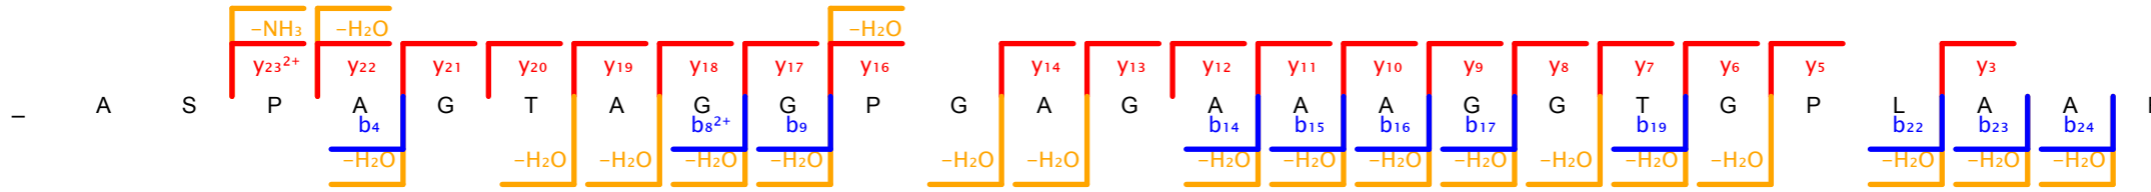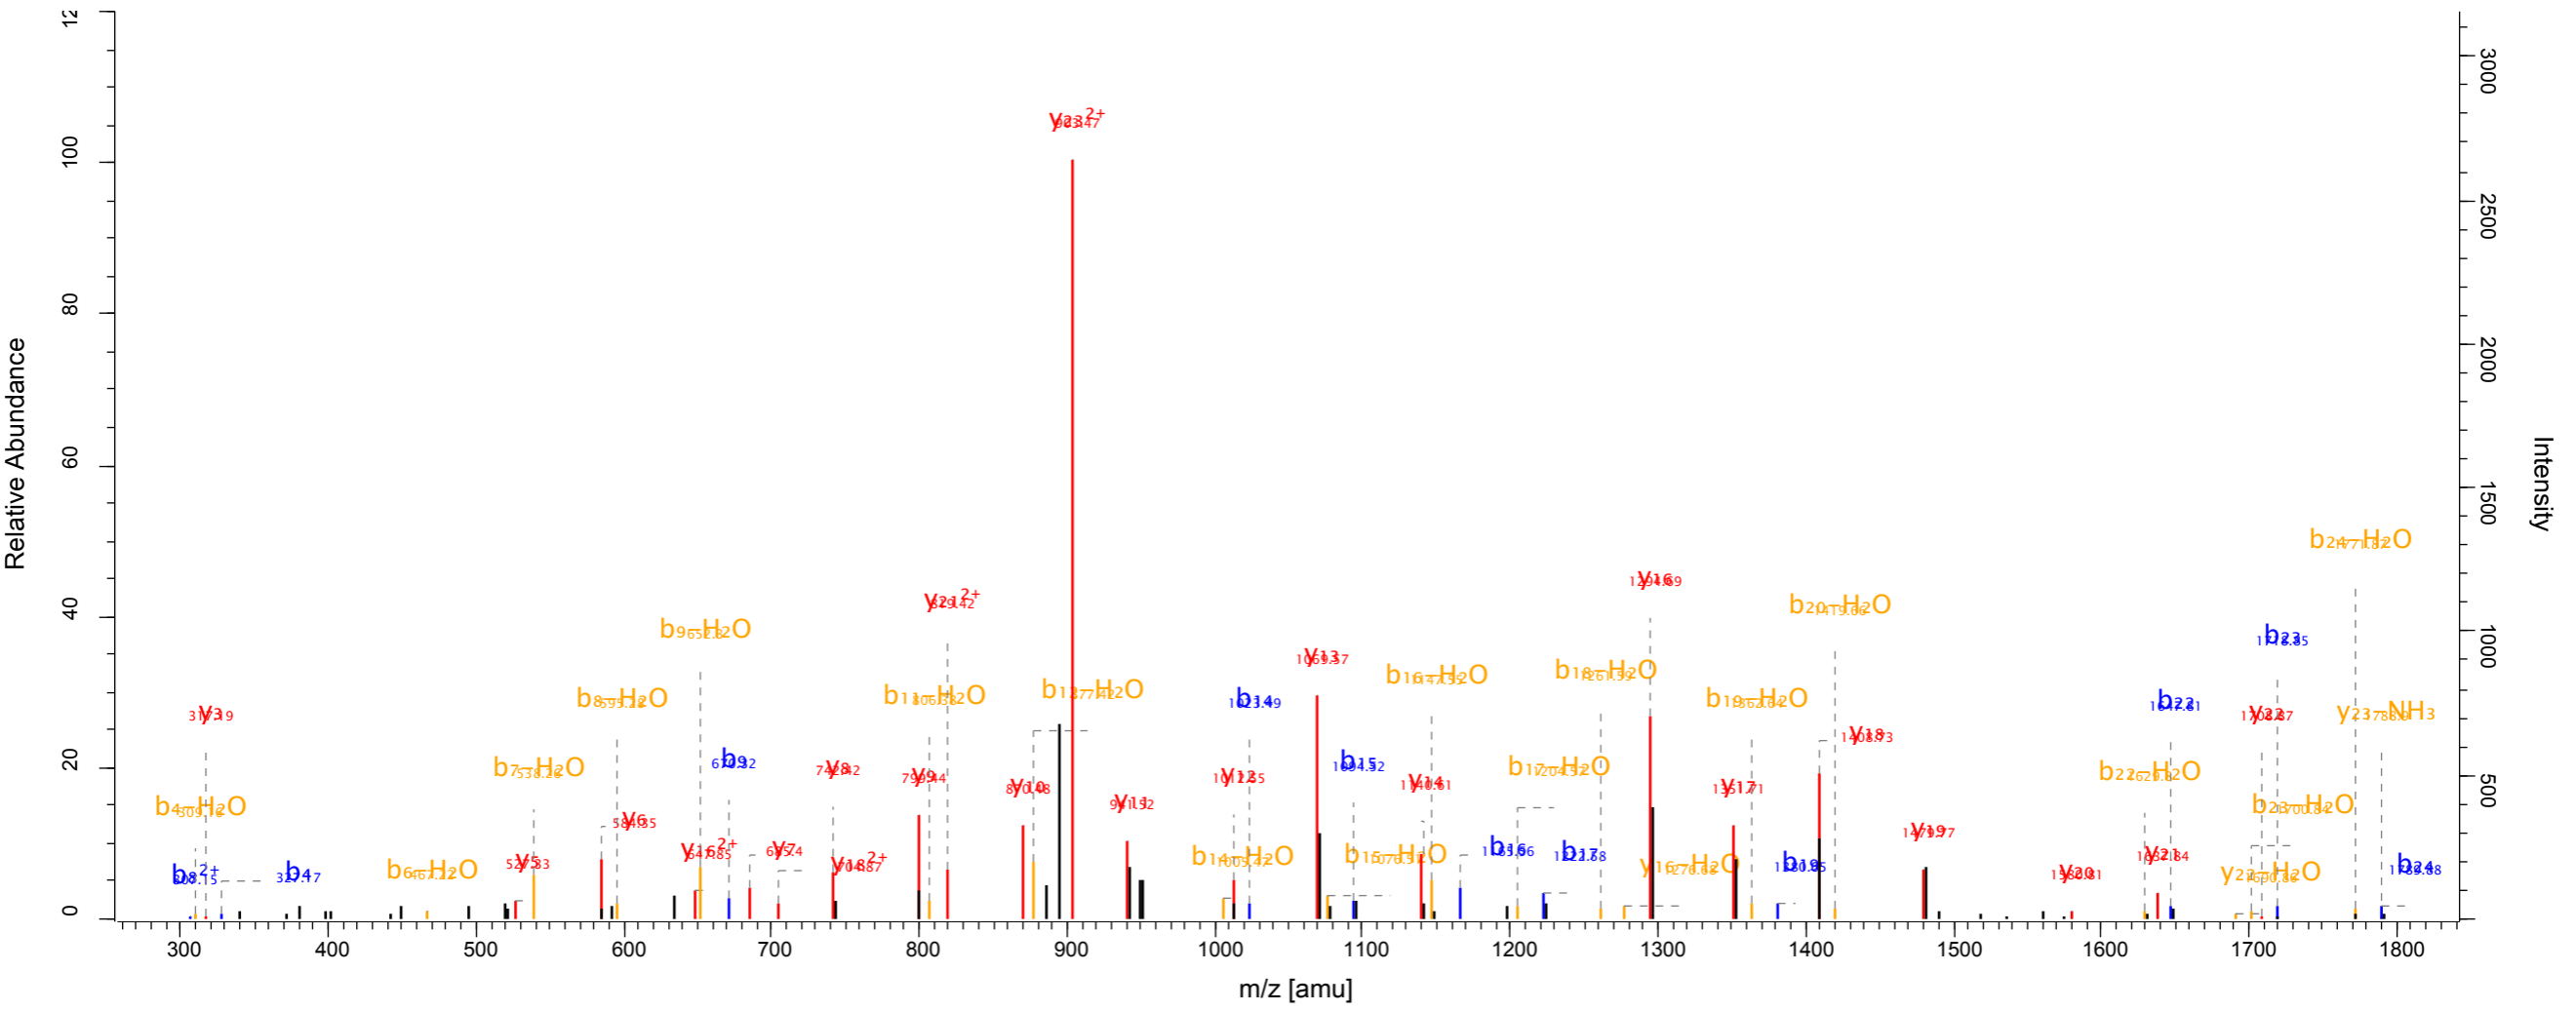

|             |           |          |                                       |
|-------------|-----------|----------|---------------------------------------|
| Scan number | 6565      | Raw file | SKaraca_LMB_Forward_H3_121011_18_rep2 |
| Method      | ITMS; CID | Pepti... | 163.79                                |

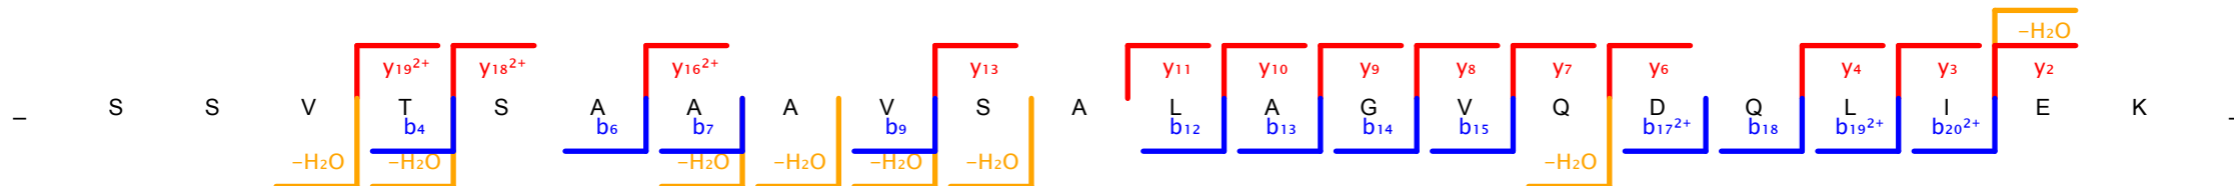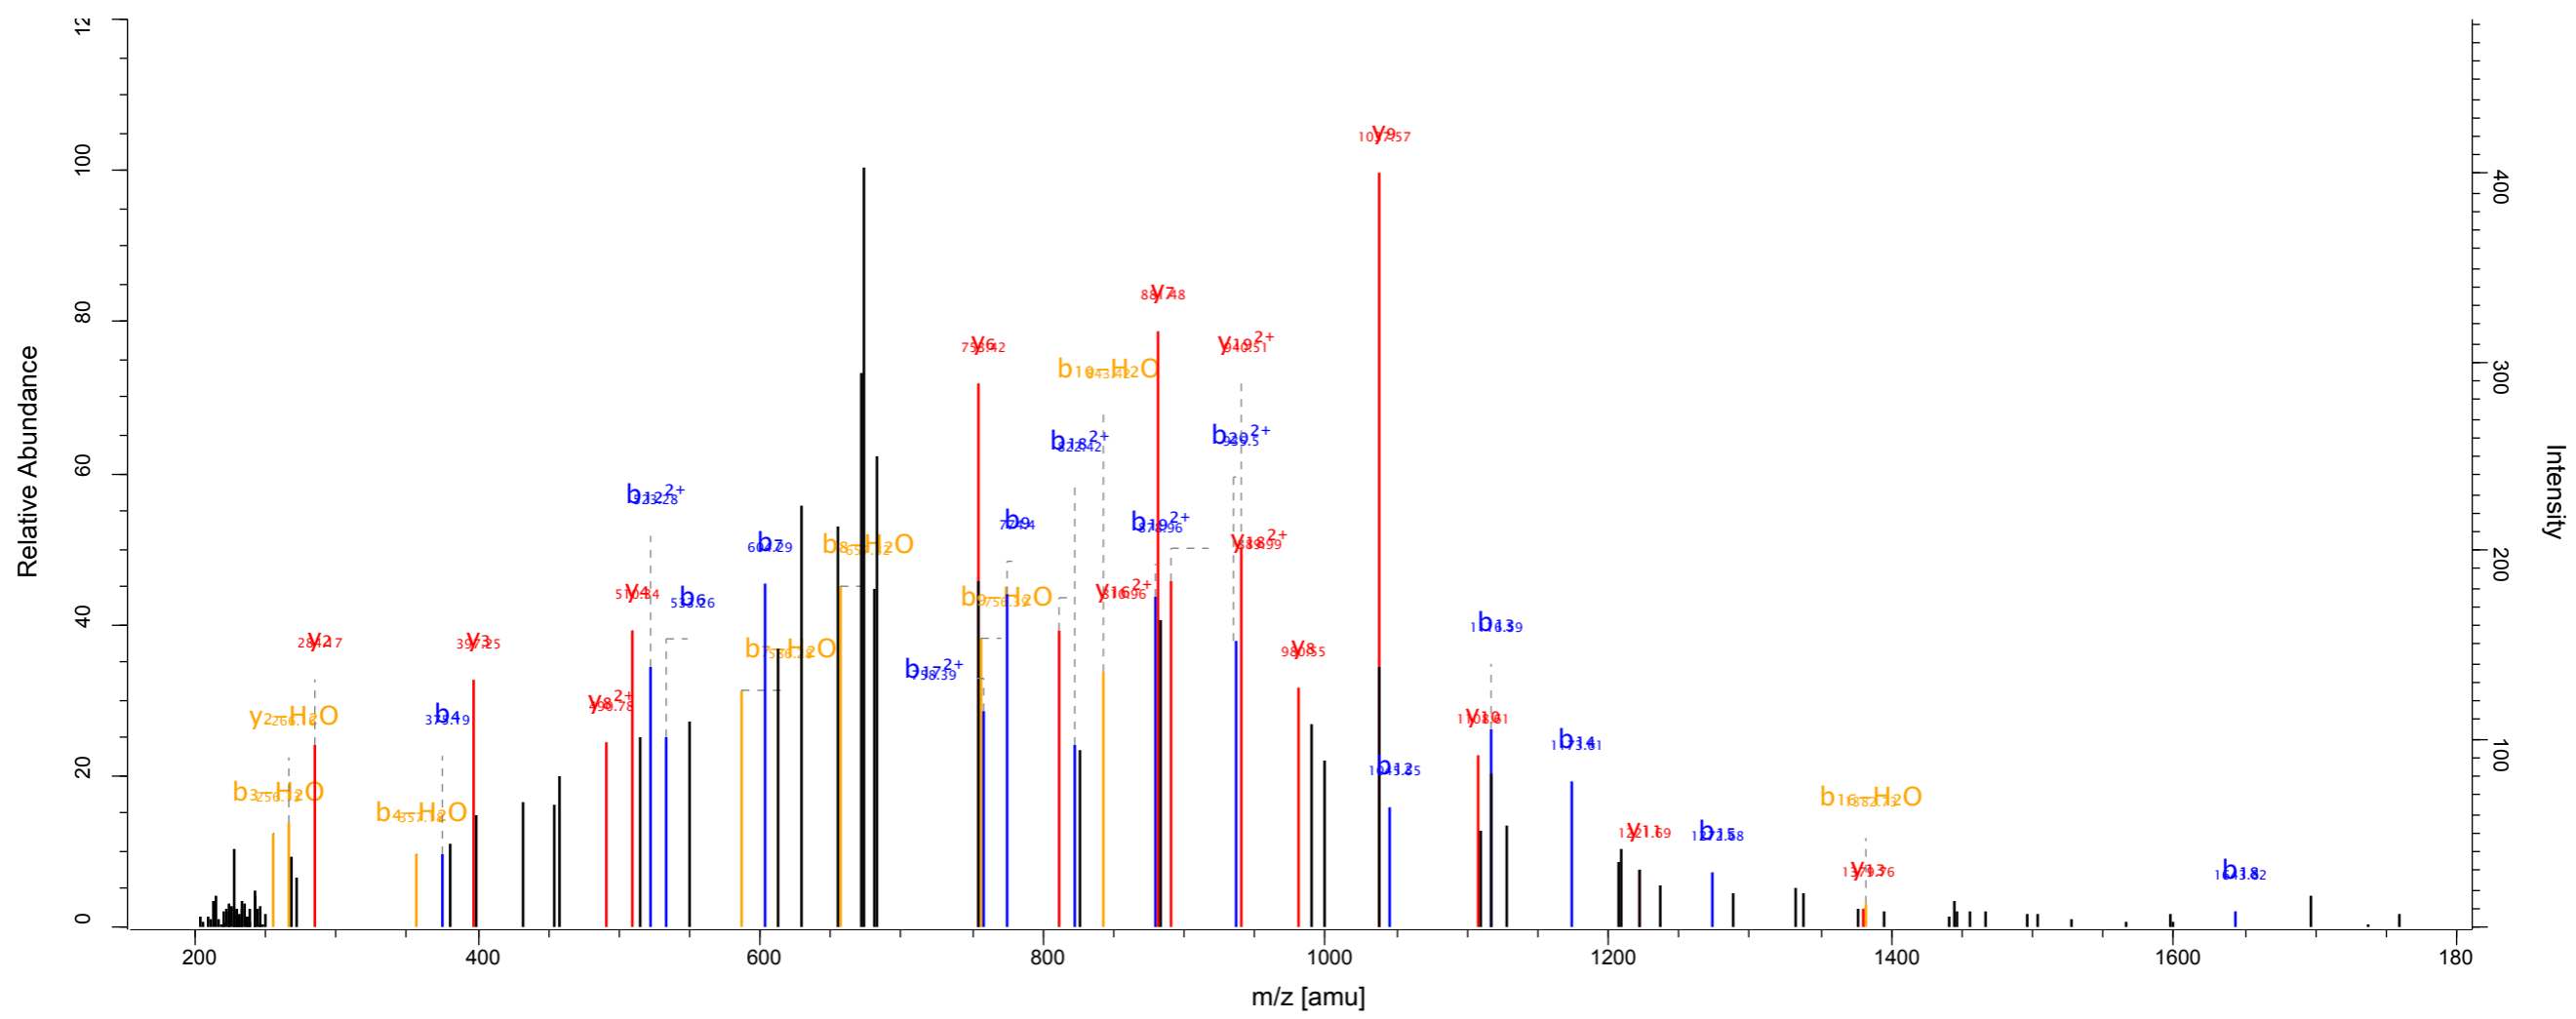

Scan number 6204 Raw file SKaraca\_LMB\_Forward\_H3\_121011\_19\_rep1  
 Method ITMS; CID Pepti... 143

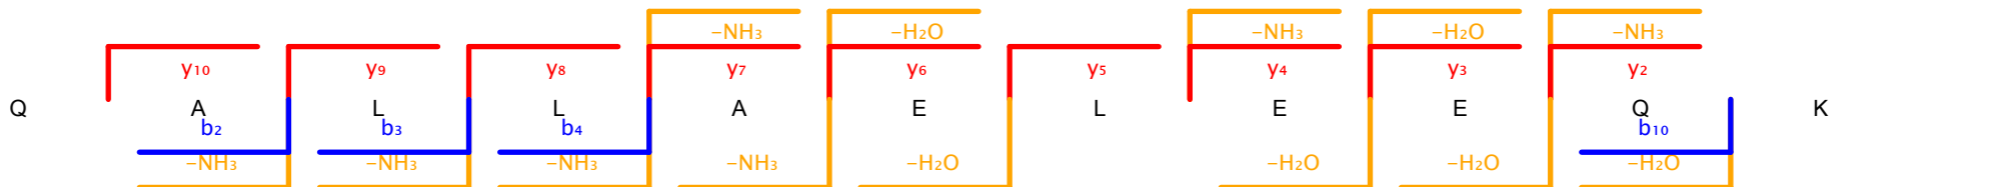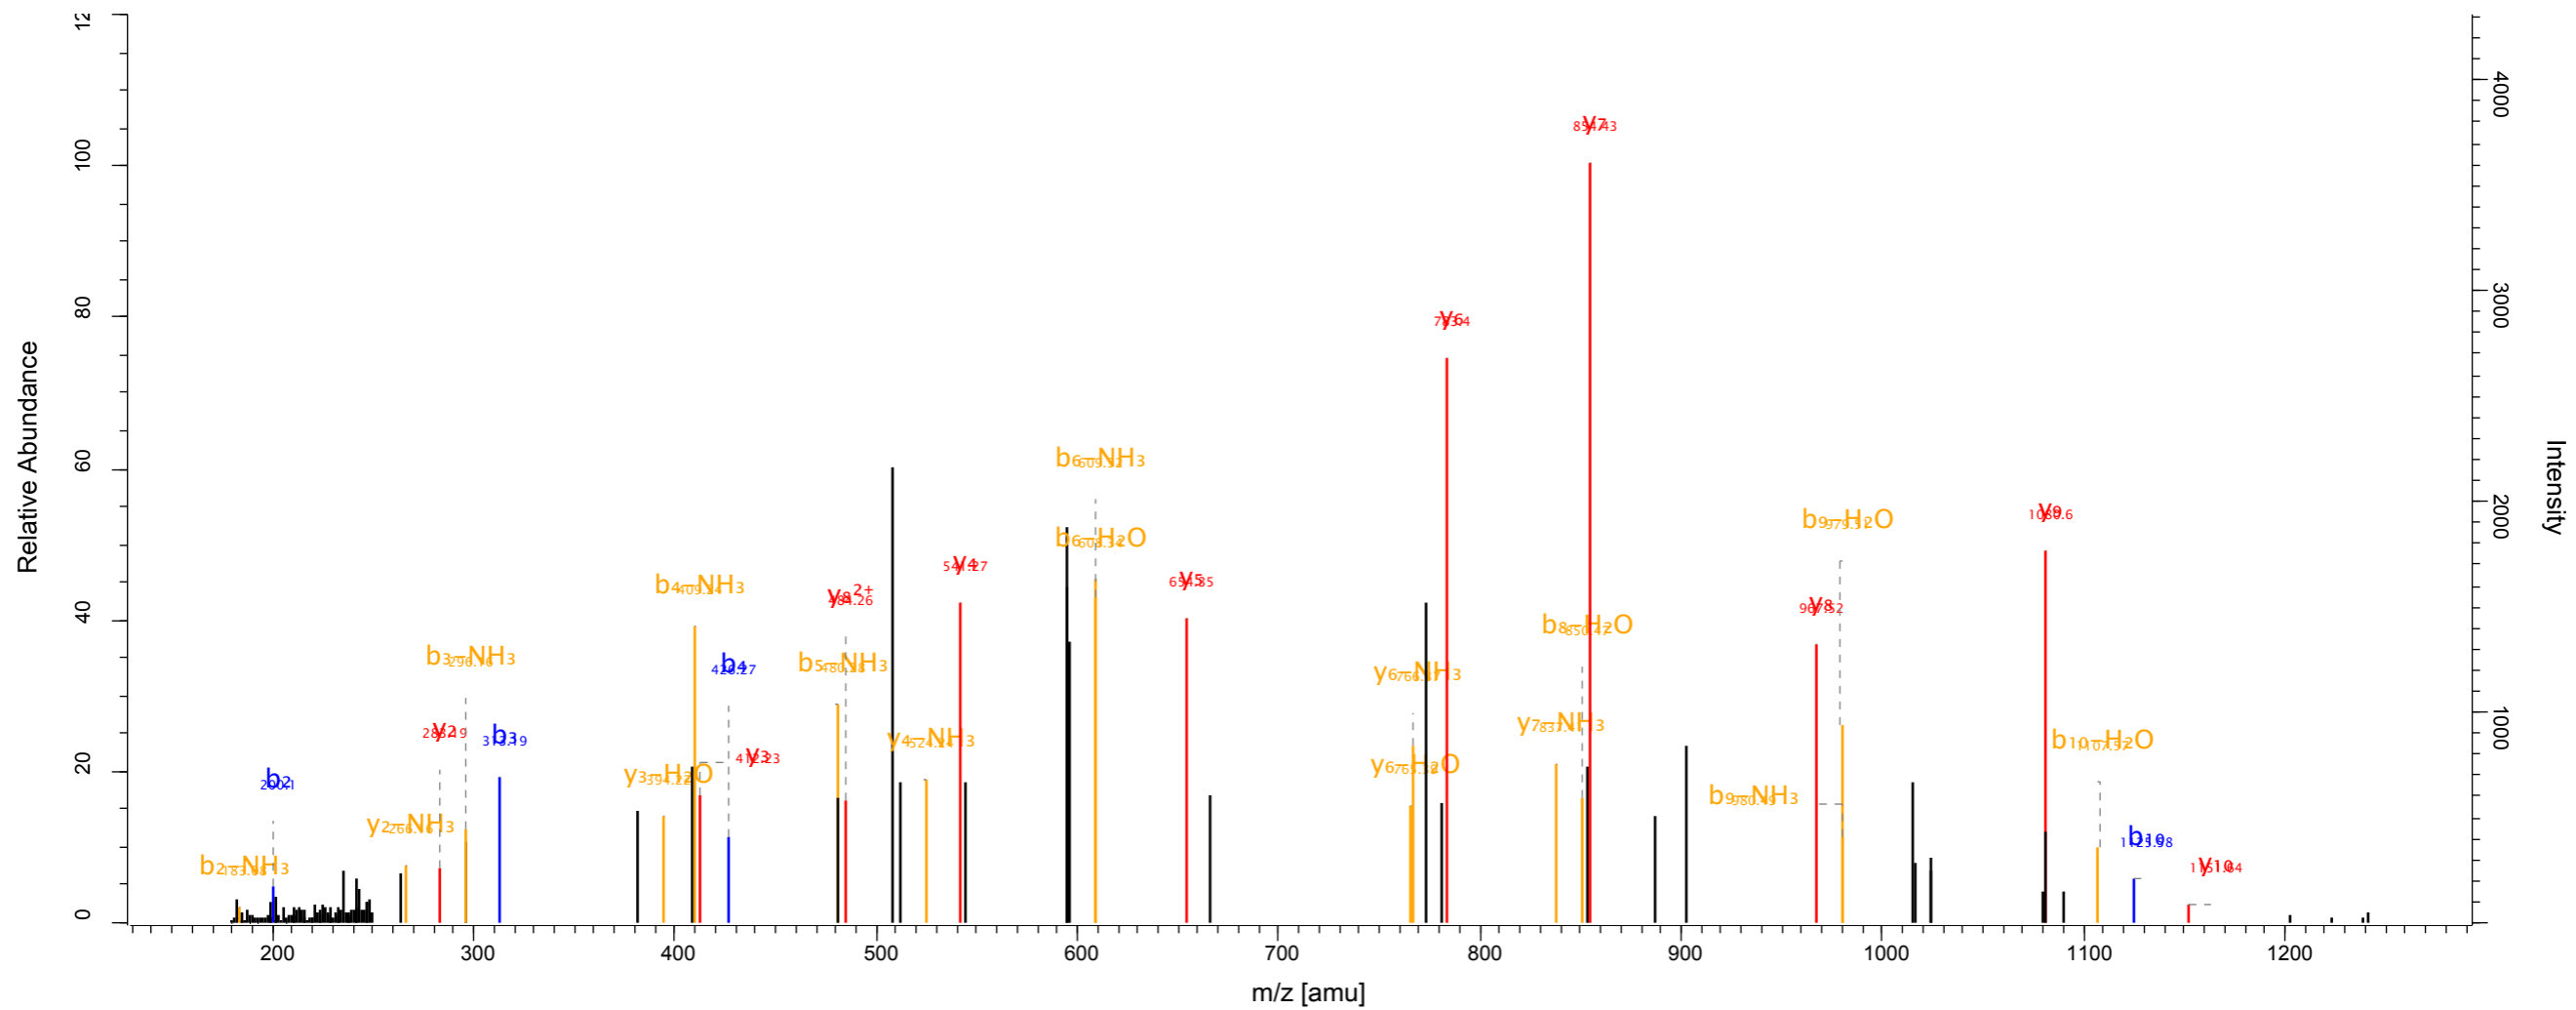

|             |           |          |                                       |
|-------------|-----------|----------|---------------------------------------|
| Scan number | 7002      | Raw file | SKaraca_LMB_Forward_H3_121011_19_rep1 |
| Method      | ITMS; CID | Pepti... | 111.52                                |

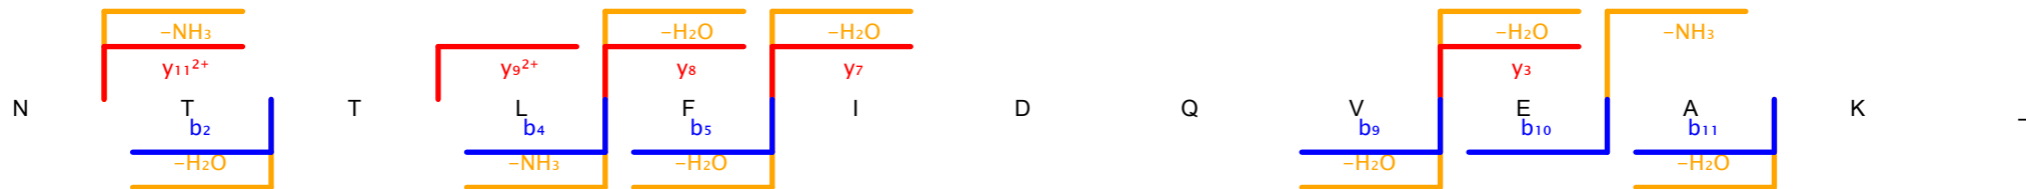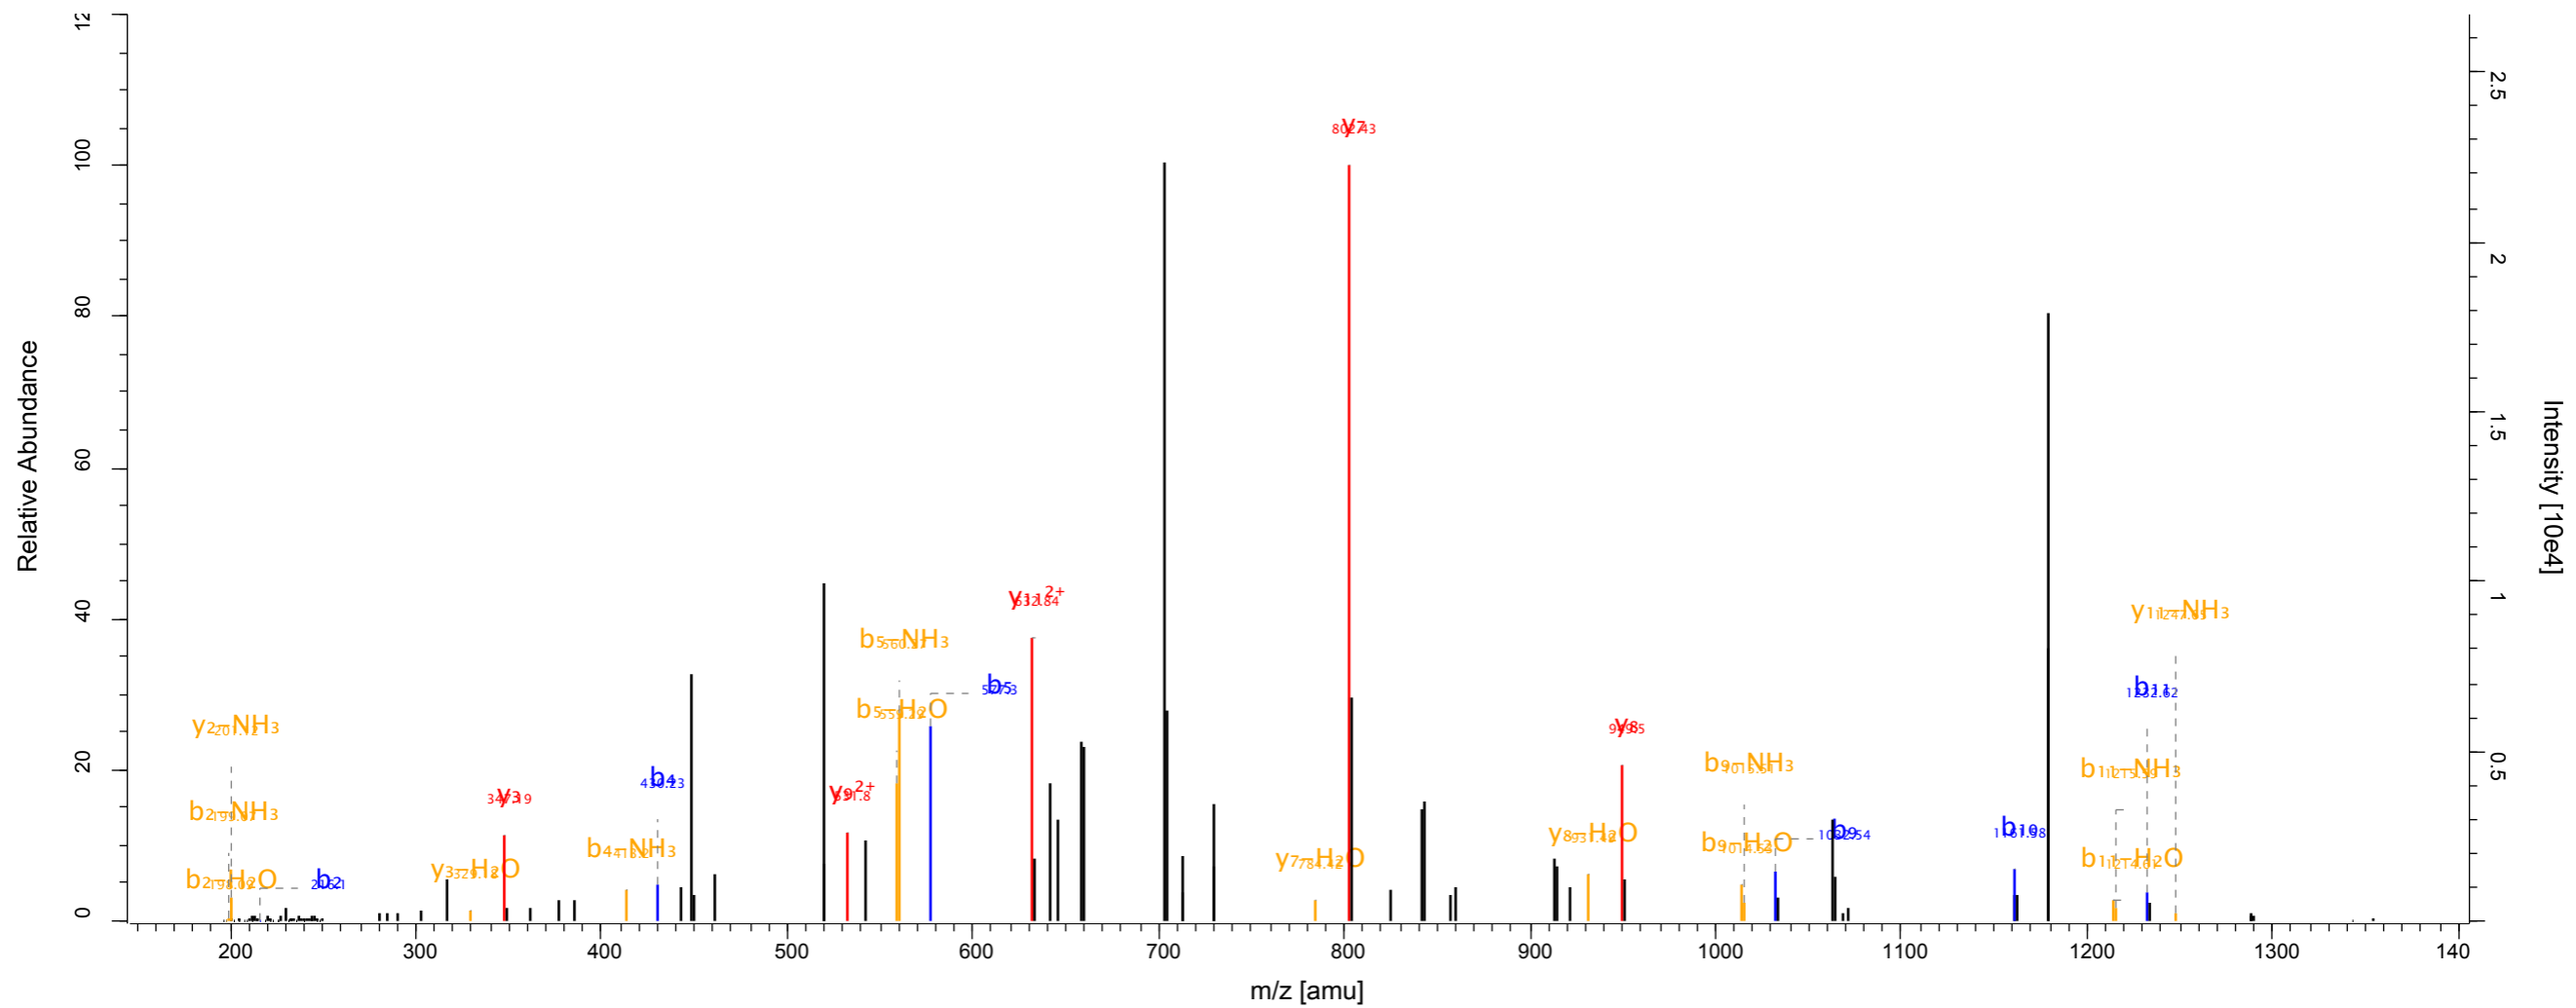

Scan number 8120 Raw file SKaraca\_LMB\_Forward\_H3\_121011\_19\_rep2  
 Method ITMS; CID Pepti... 140.17

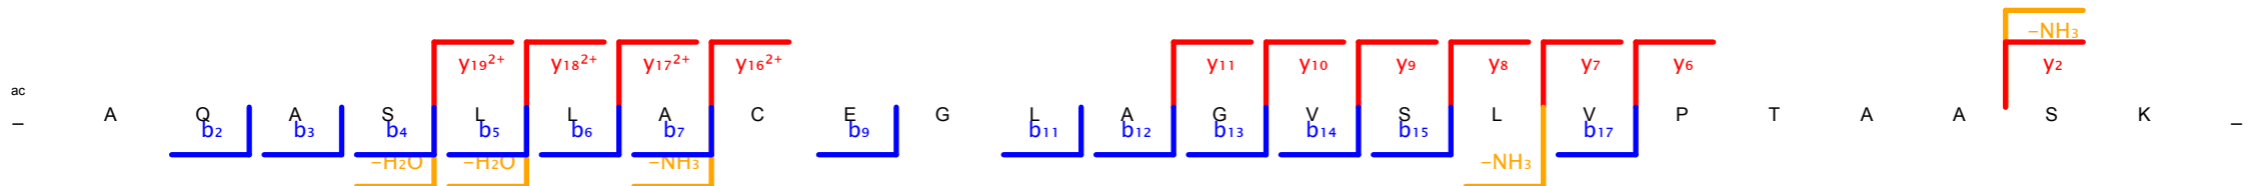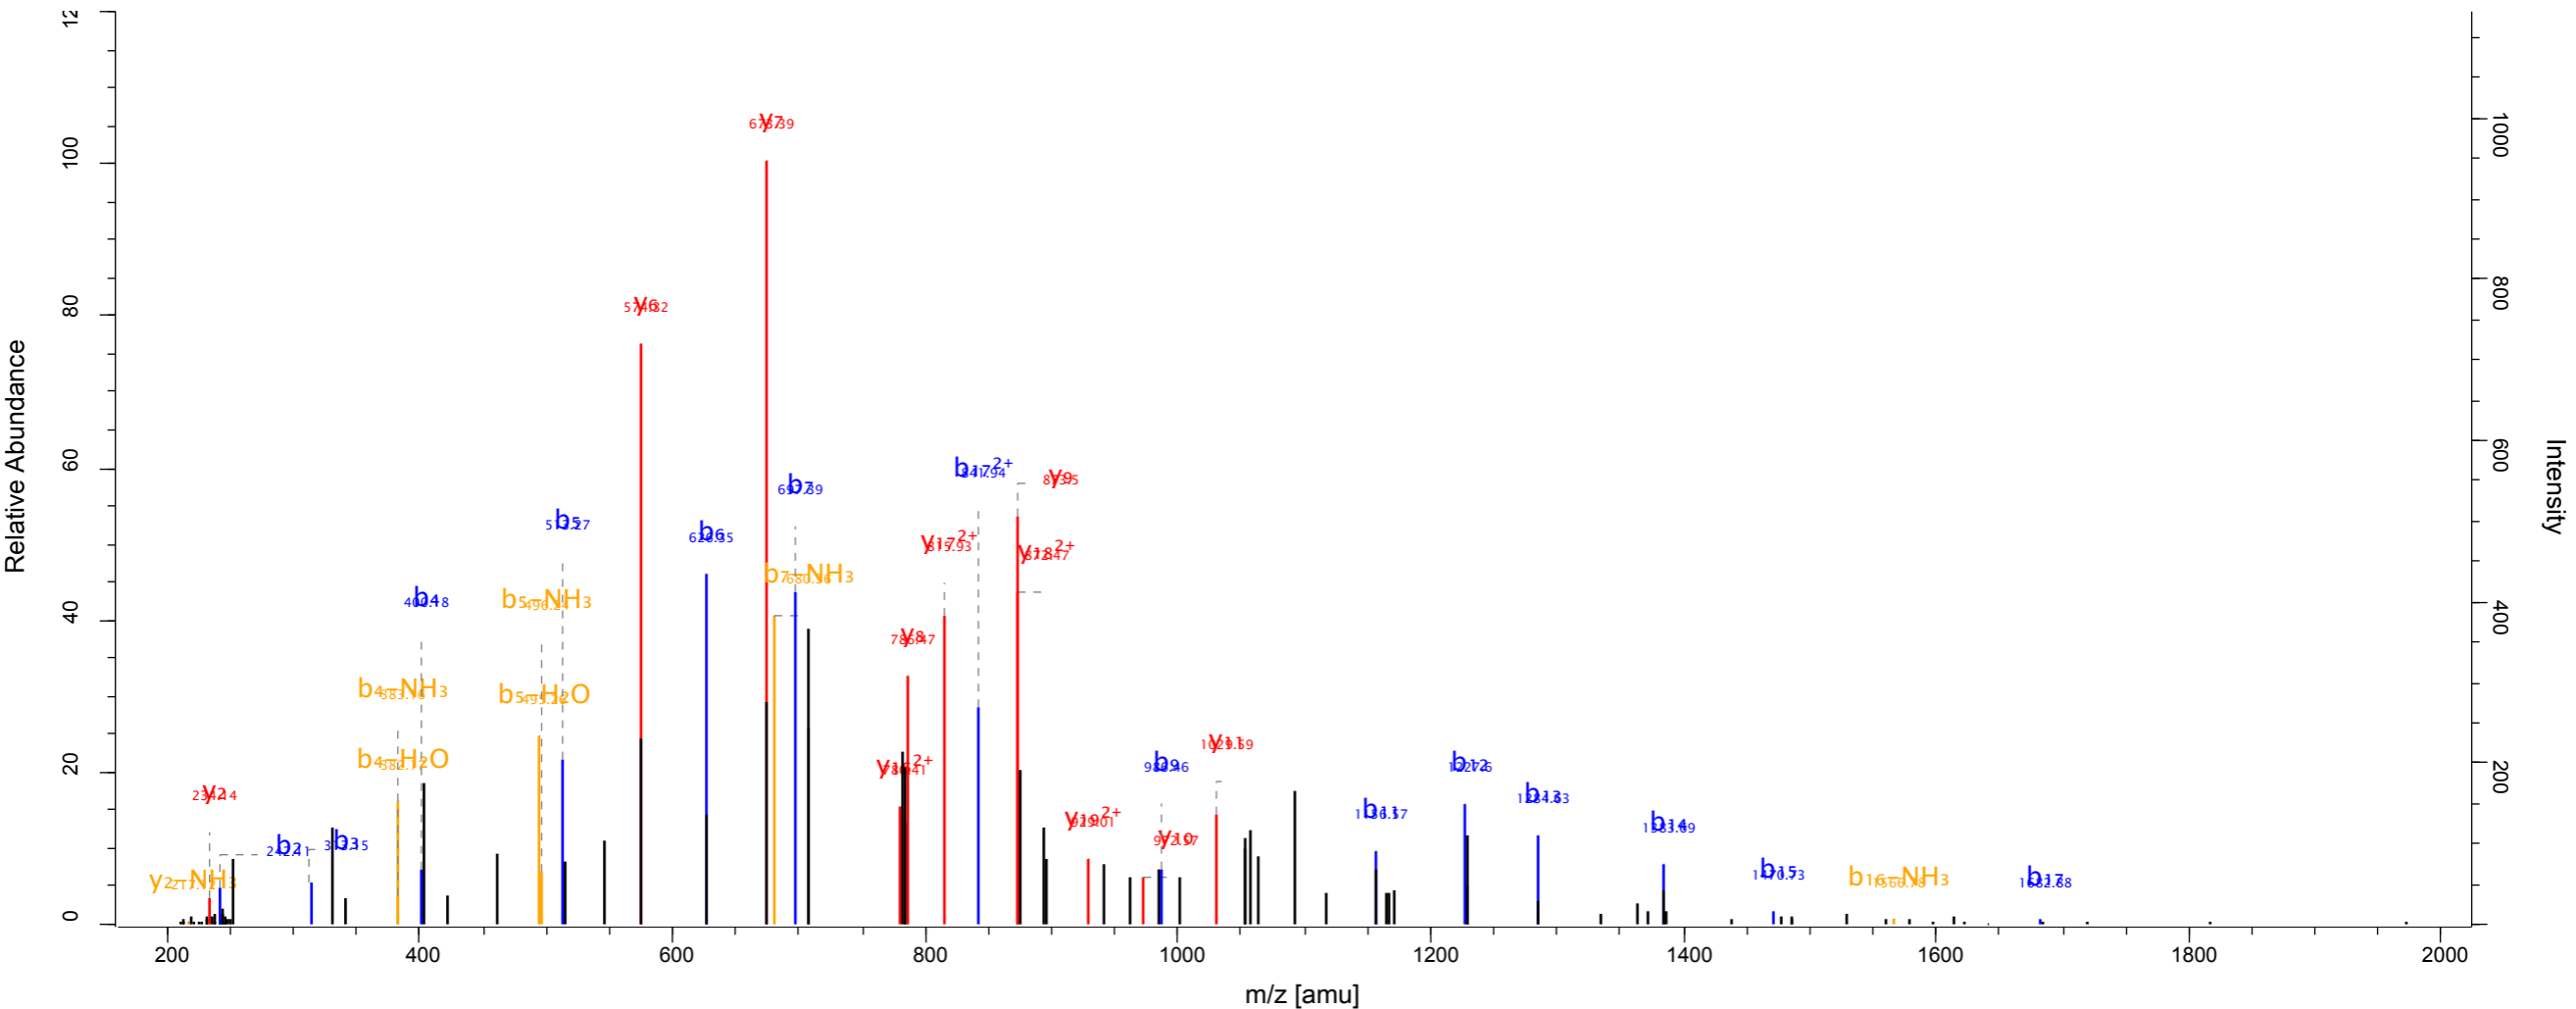

|             |           |          |                                      |
|-------------|-----------|----------|--------------------------------------|
| Scan number | 3868      | Raw file | SKaraca_LMB_Forward_H3_121011_2_rep2 |
| Method      | ITMS; CID | Pepti... | 154.15                               |

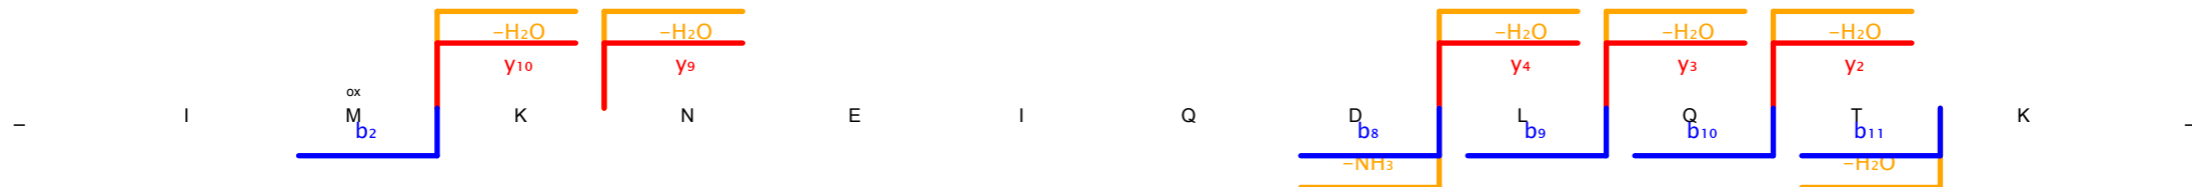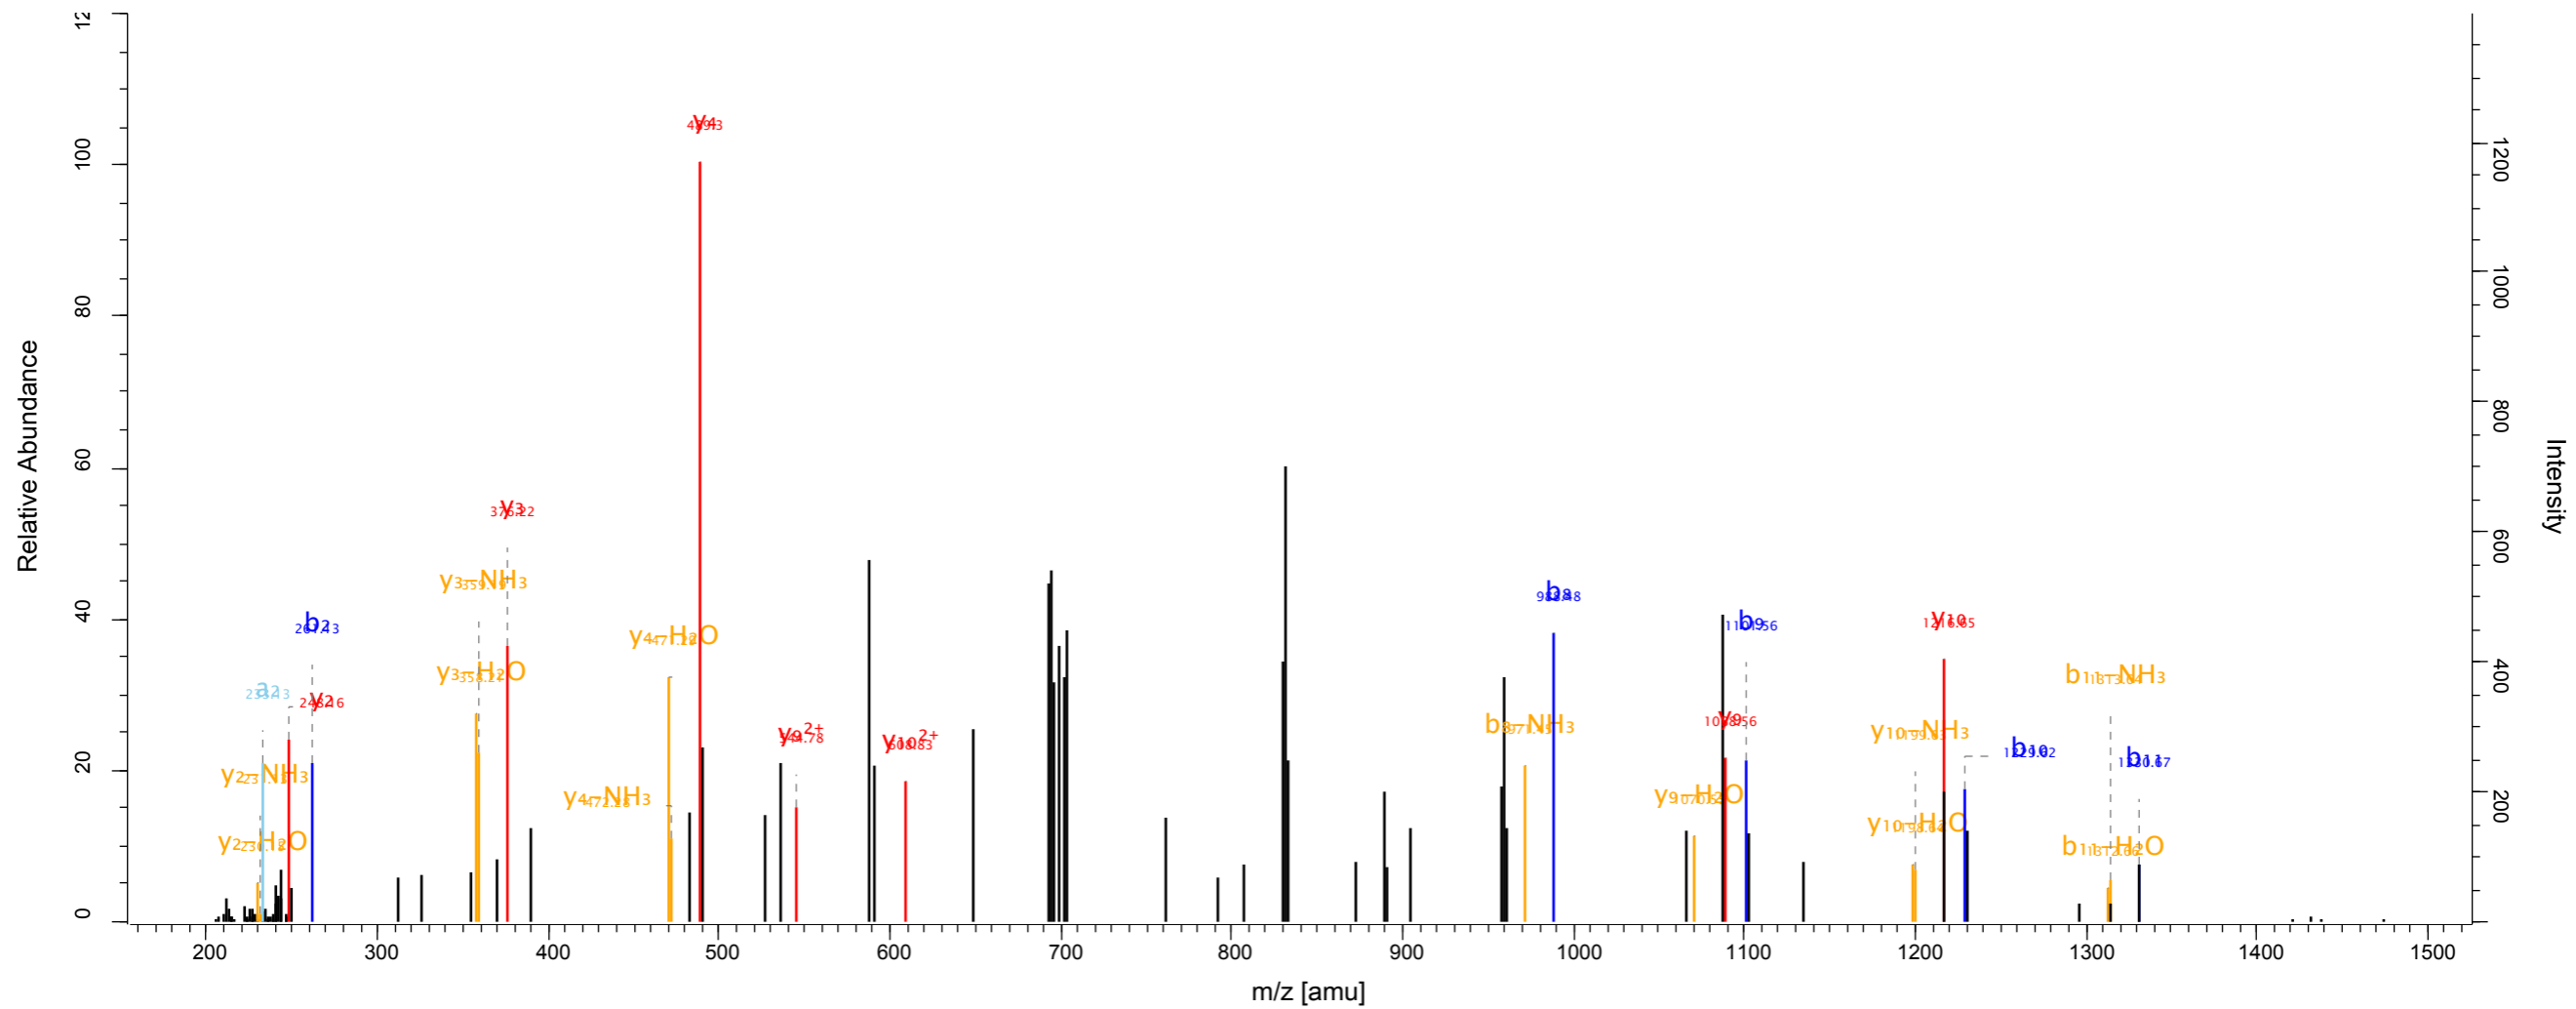



|             |           |          |                                       |
|-------------|-----------|----------|---------------------------------------|
| Scan number | 6298      | Raw file | SKaraca_LMB_Forward_H3_121011_20_rep1 |
| Method      | ITMS; CID | Pepti... | 201.84                                |

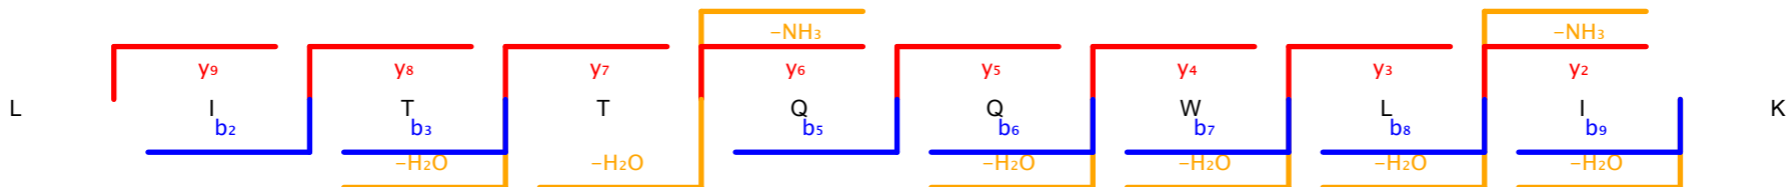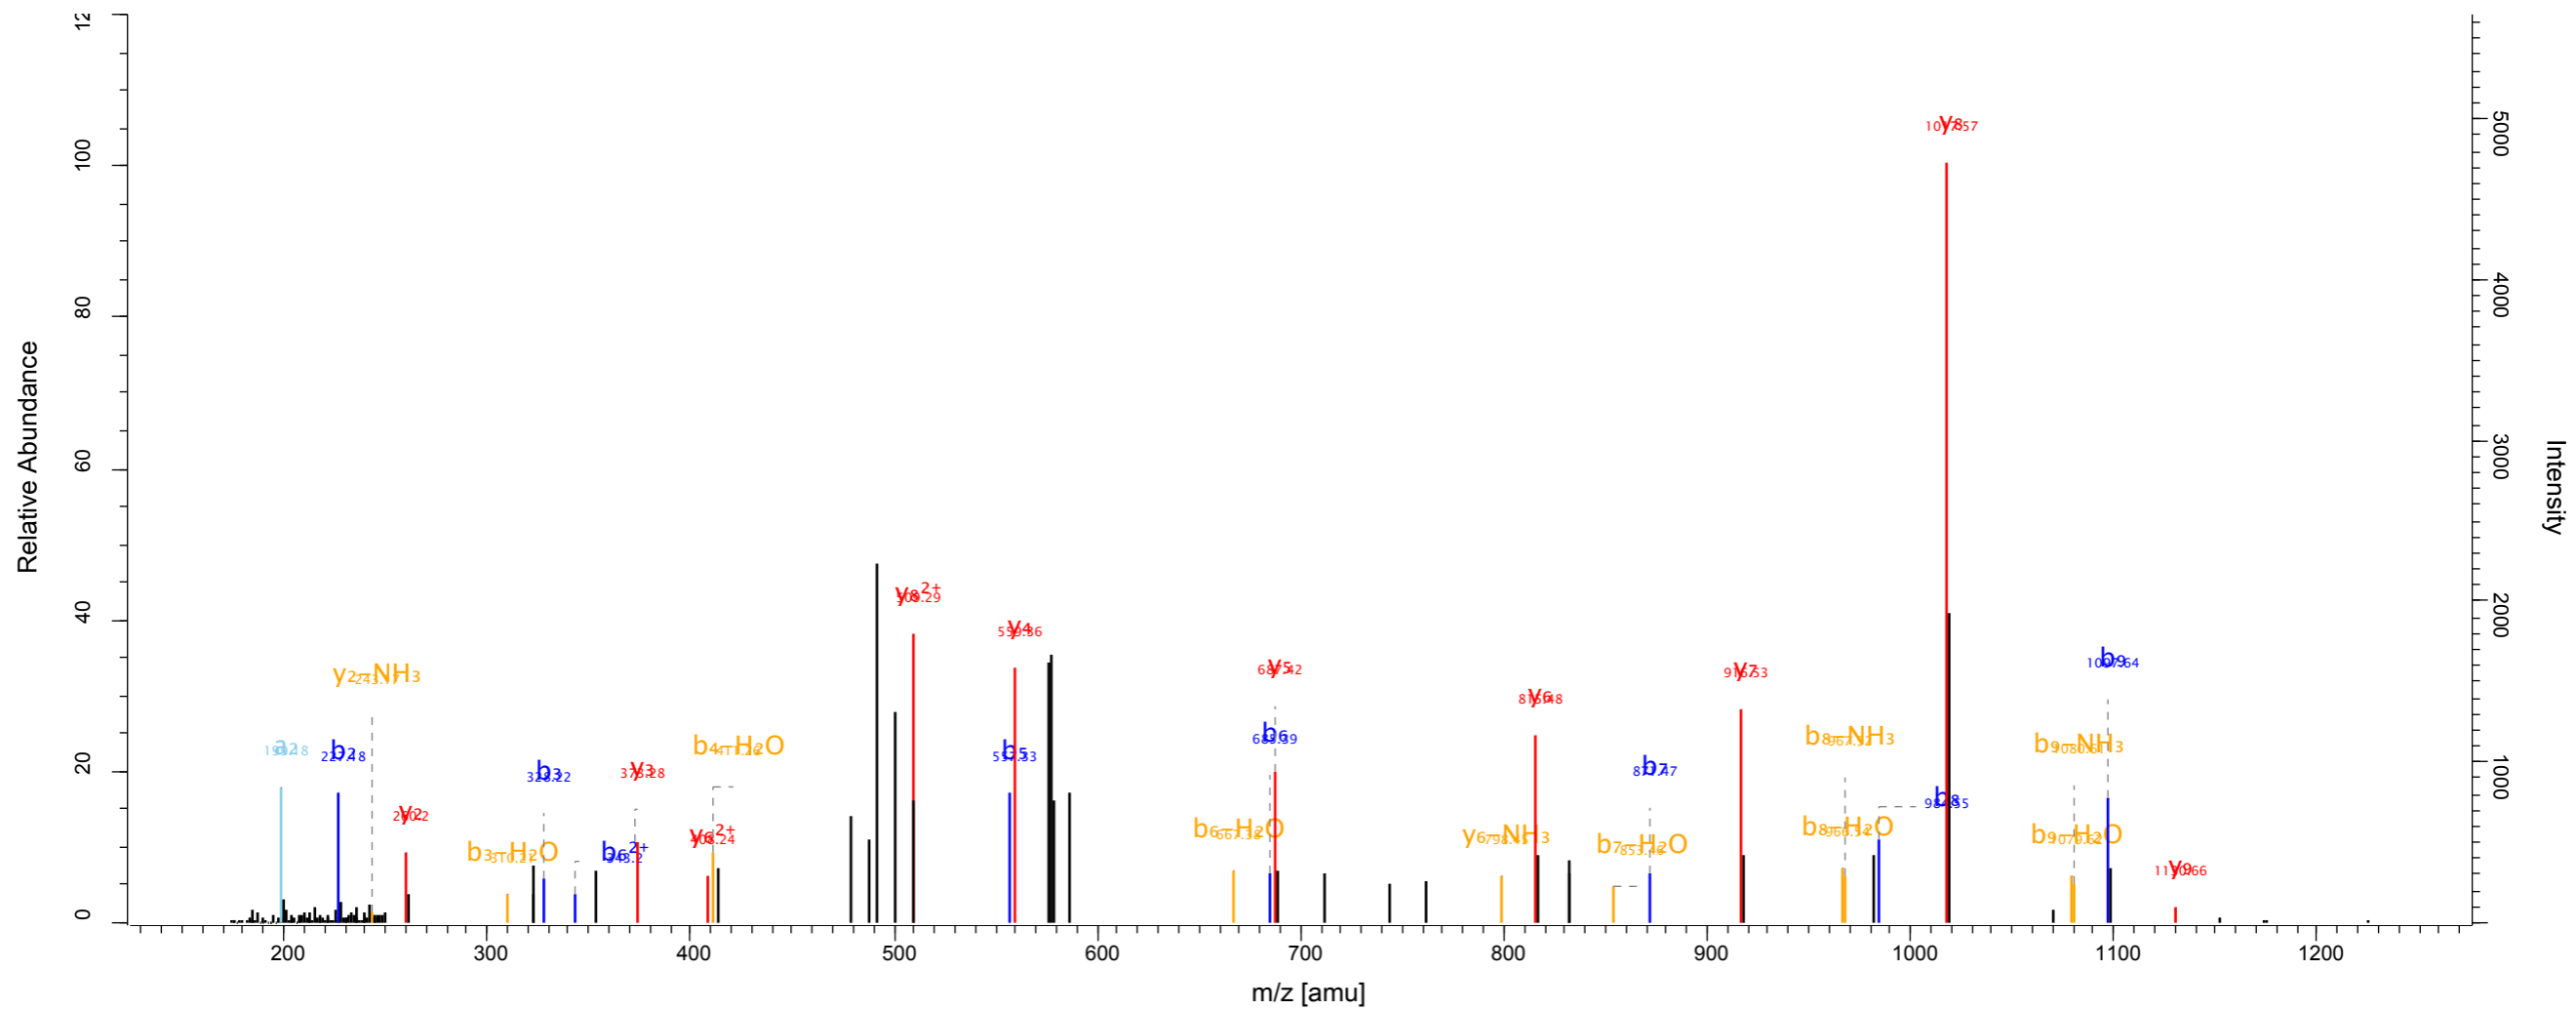

|             |           |          |                                       |
|-------------|-----------|----------|---------------------------------------|
| Scan number | 8223      | Raw file | SKaraca_LMB_Forward_H3_121011_20_rep1 |
| Method      | ITMS; CID | Pepti... | 134.9                                 |

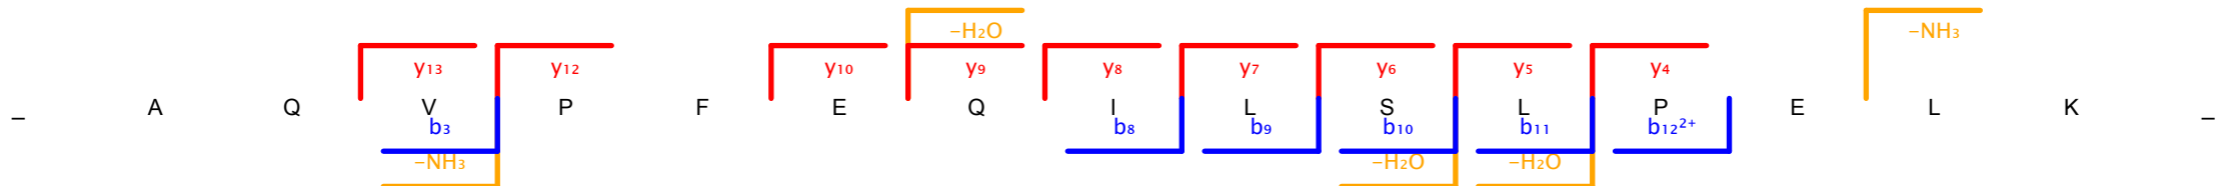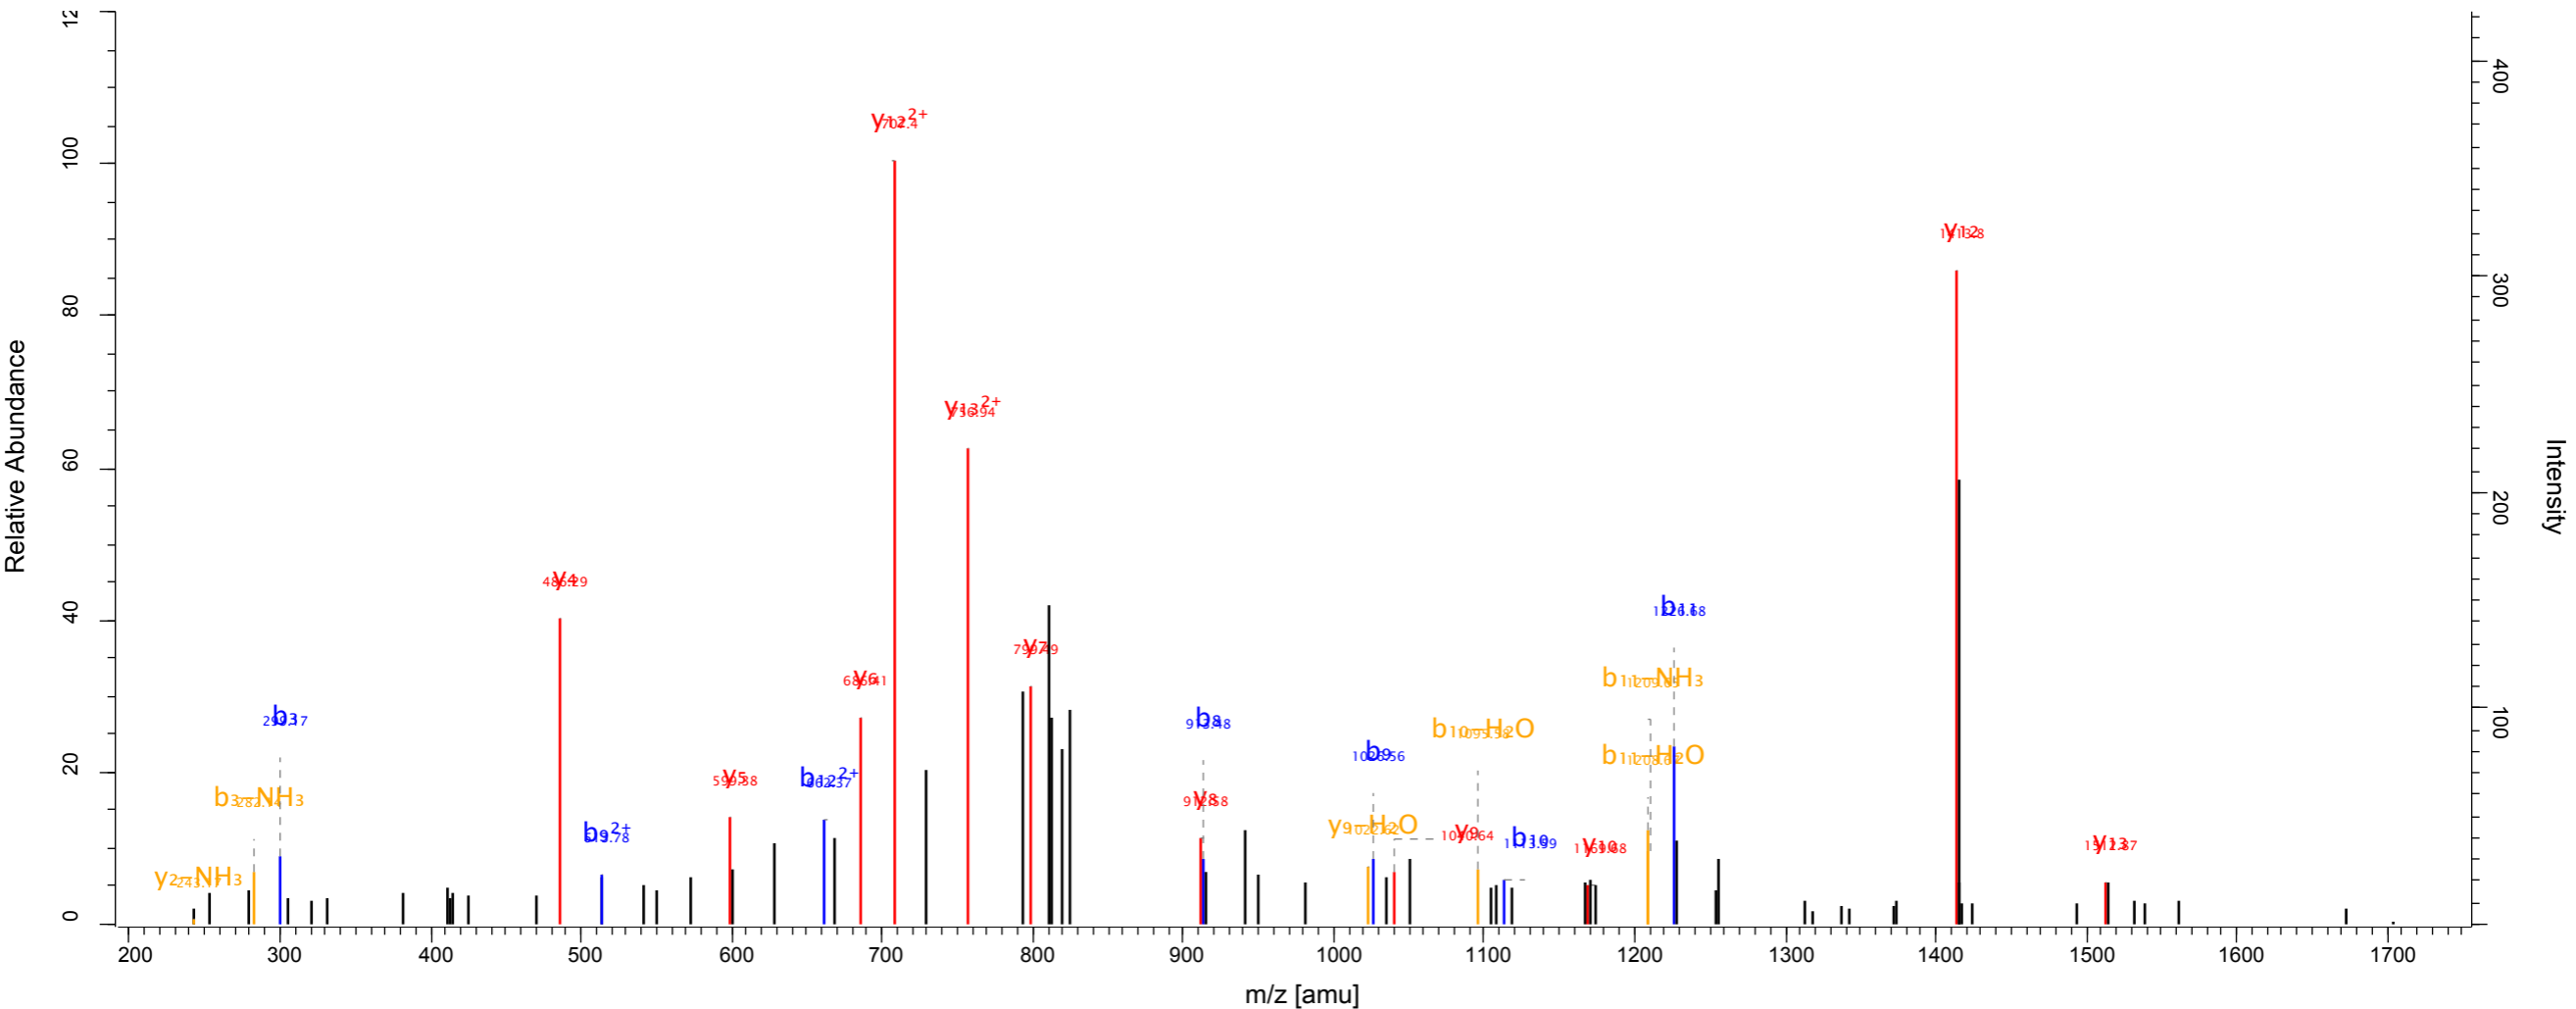

Scan number 6669 Raw file SKaraca\_LMB\_Forward\_H3\_121011\_20\_rep2  
 Method ITMS; CID Pepti... 130.72

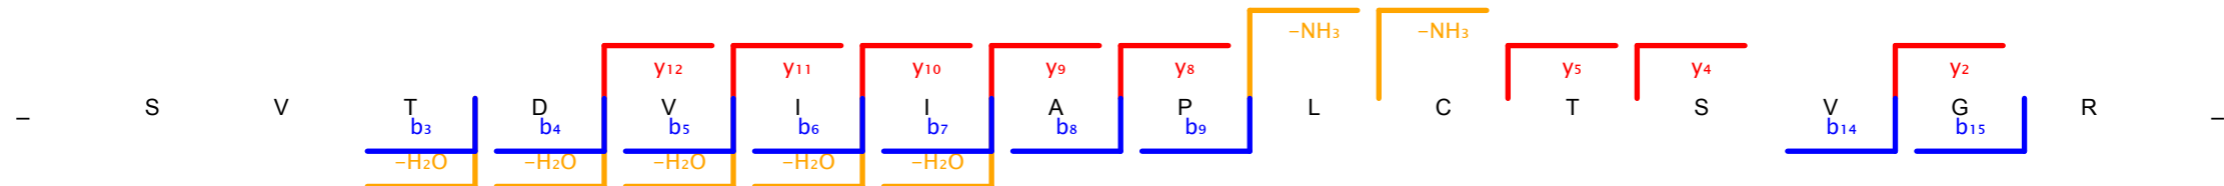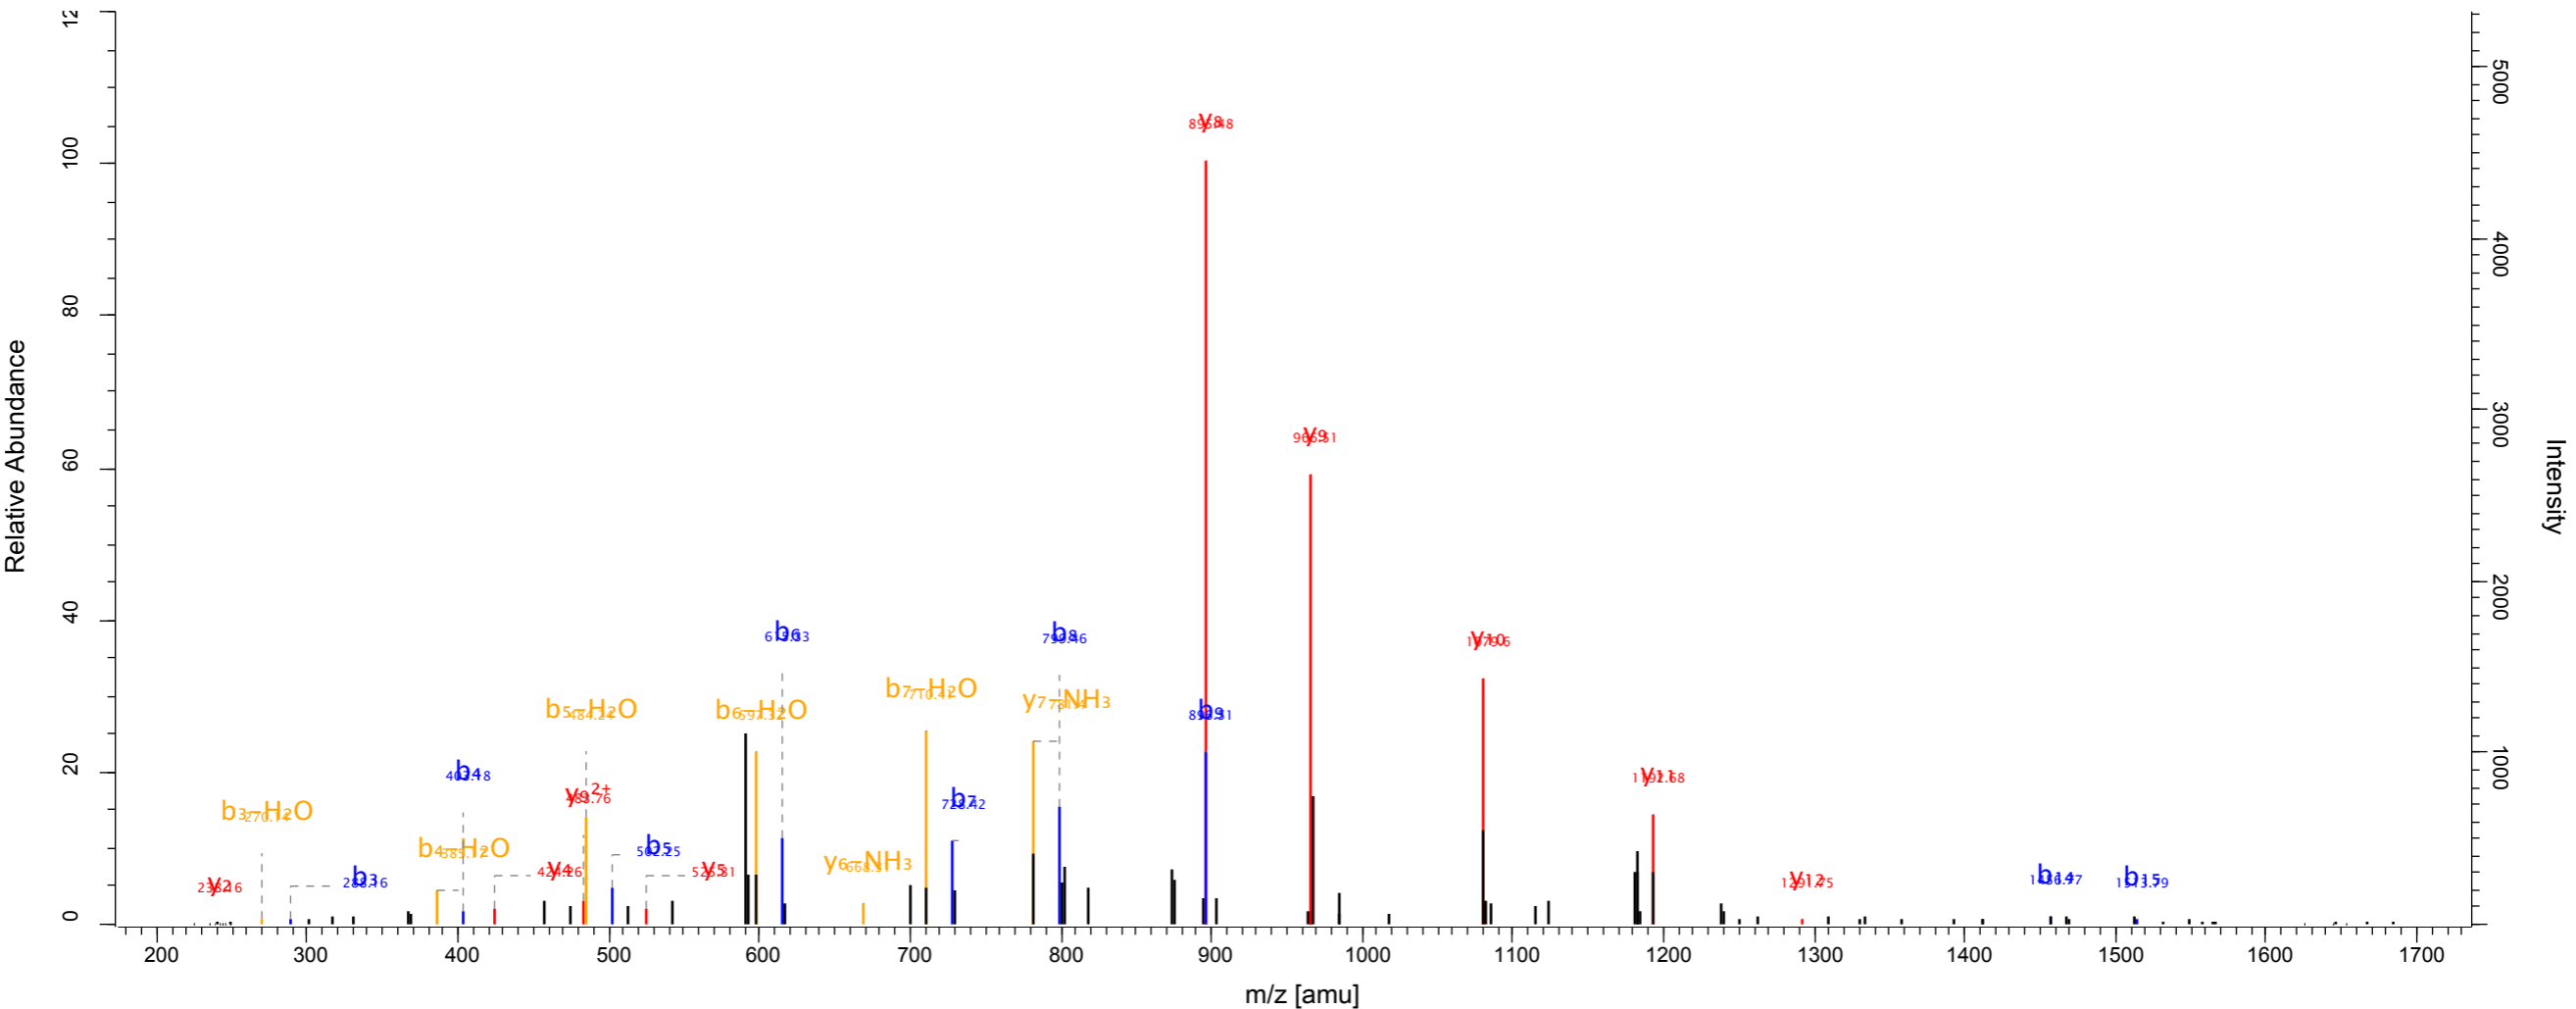

|             |           |          |                                       |
|-------------|-----------|----------|---------------------------------------|
| Scan number | 1477      | Raw file | SKaraca_LMB_Forward_H3_121011_21_rep1 |
| Method      | ITMS; CID | Pepti... | 143.03                                |

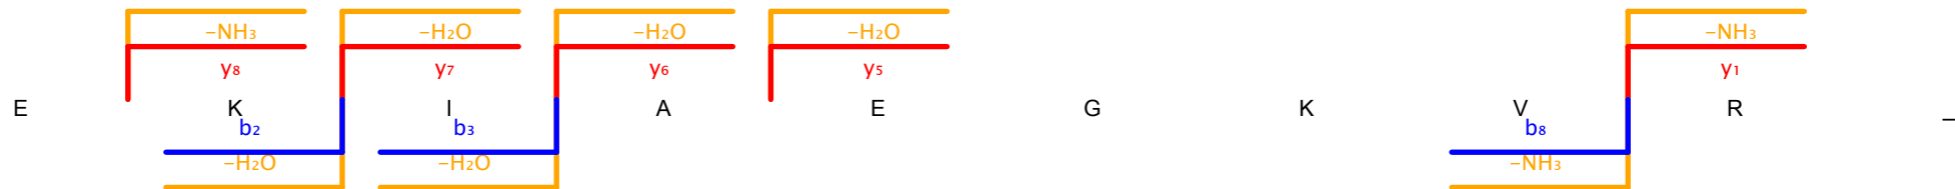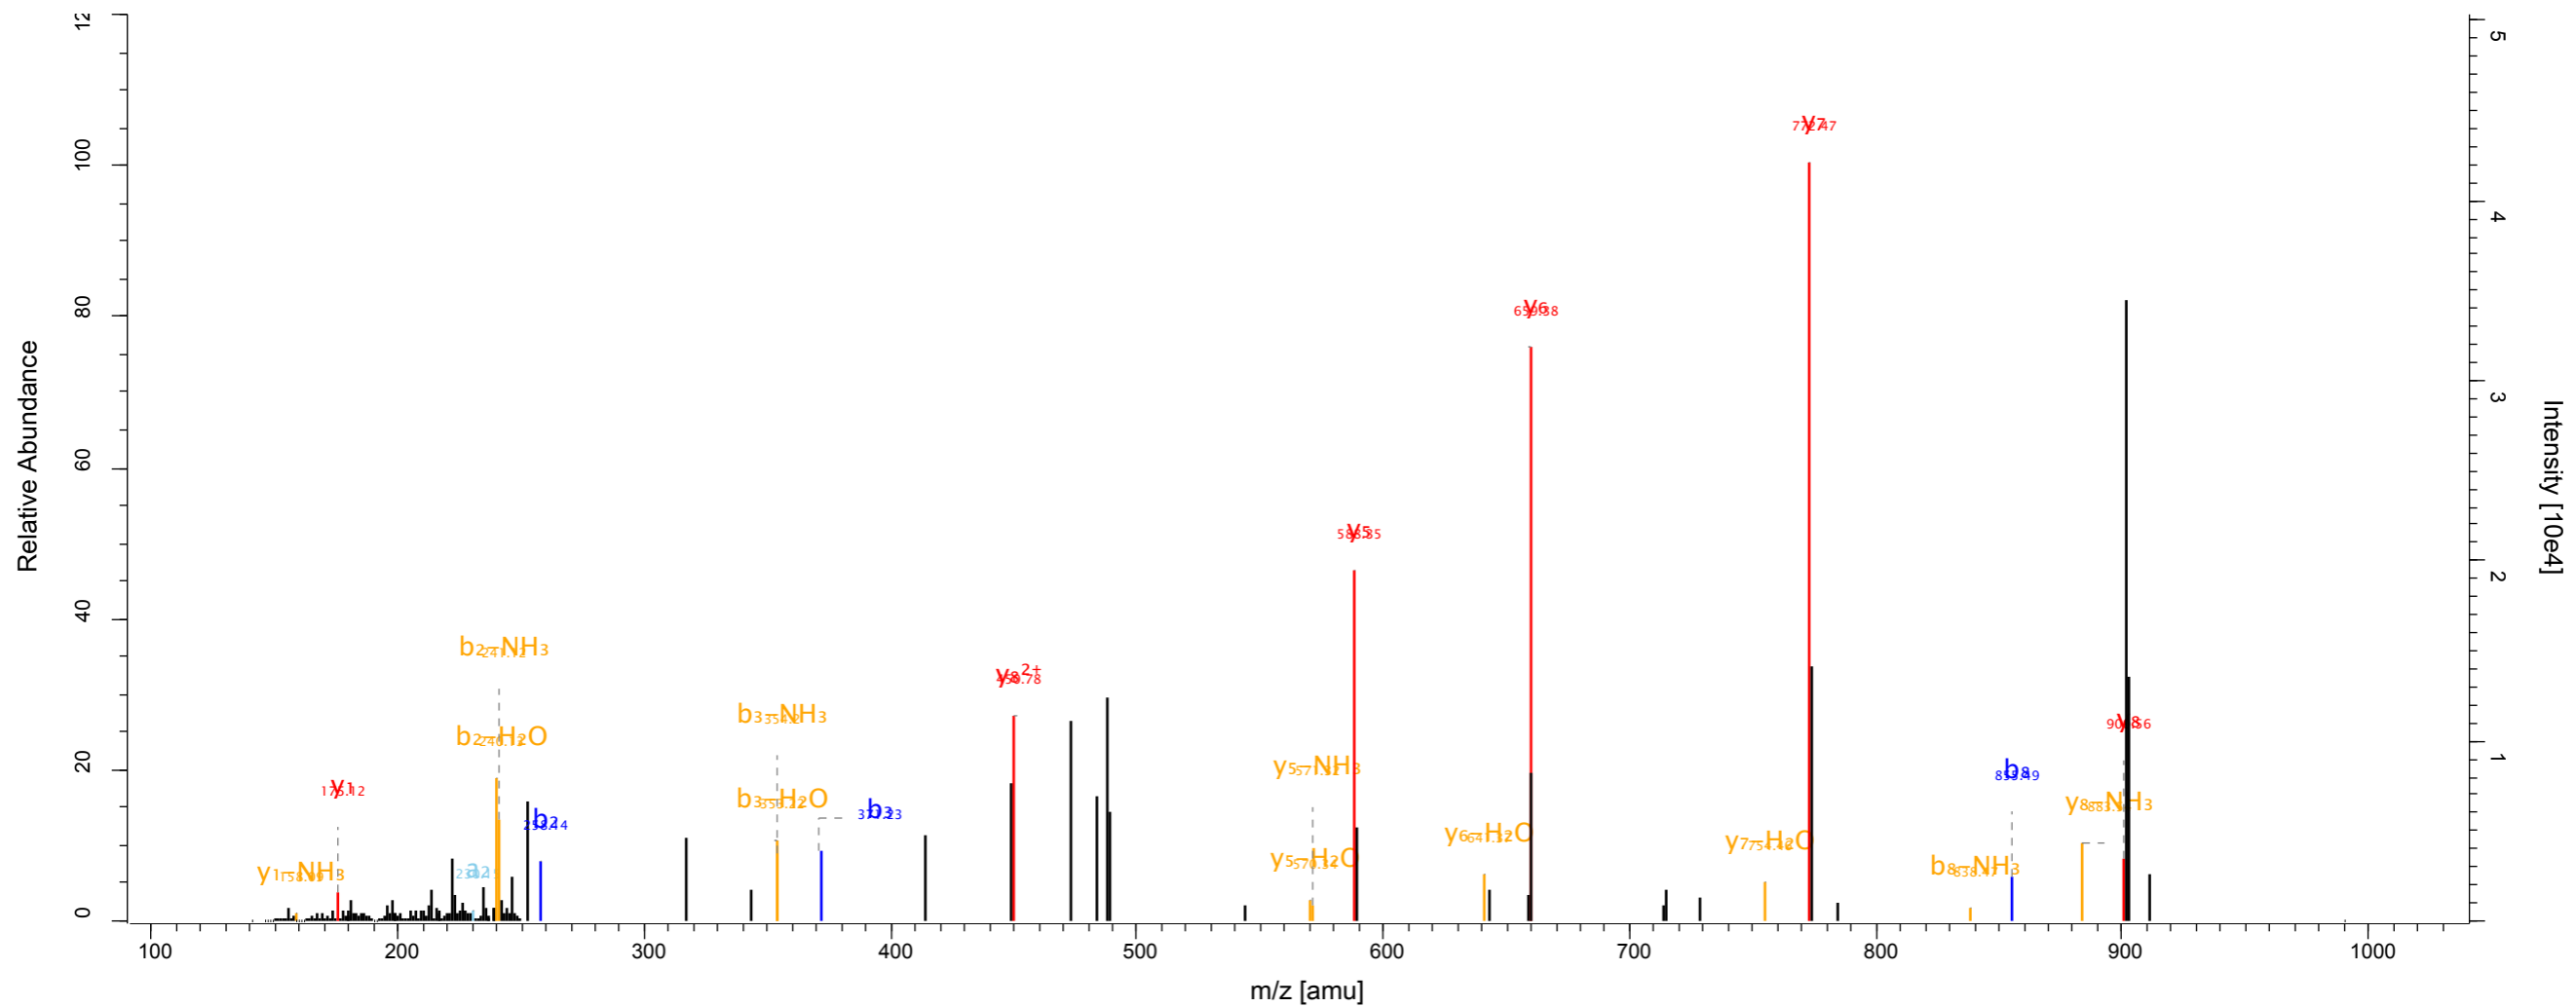

Scan number 3920 Raw file SKaraca\_LMB\_Forward\_H3\_121011\_21\_rep2  
 Method ITMS; CID Pepti... 193.52

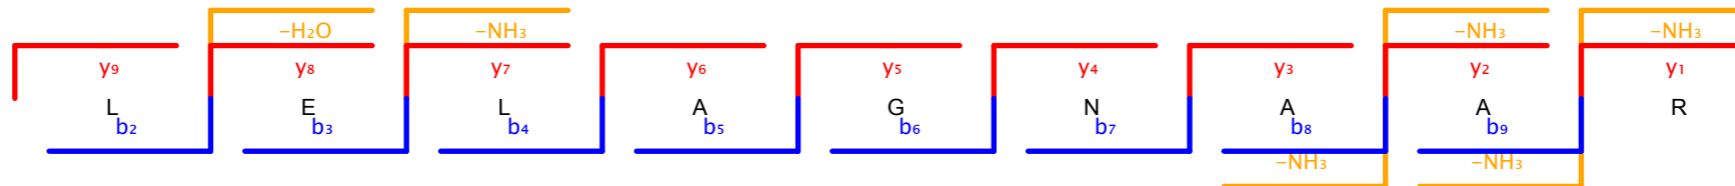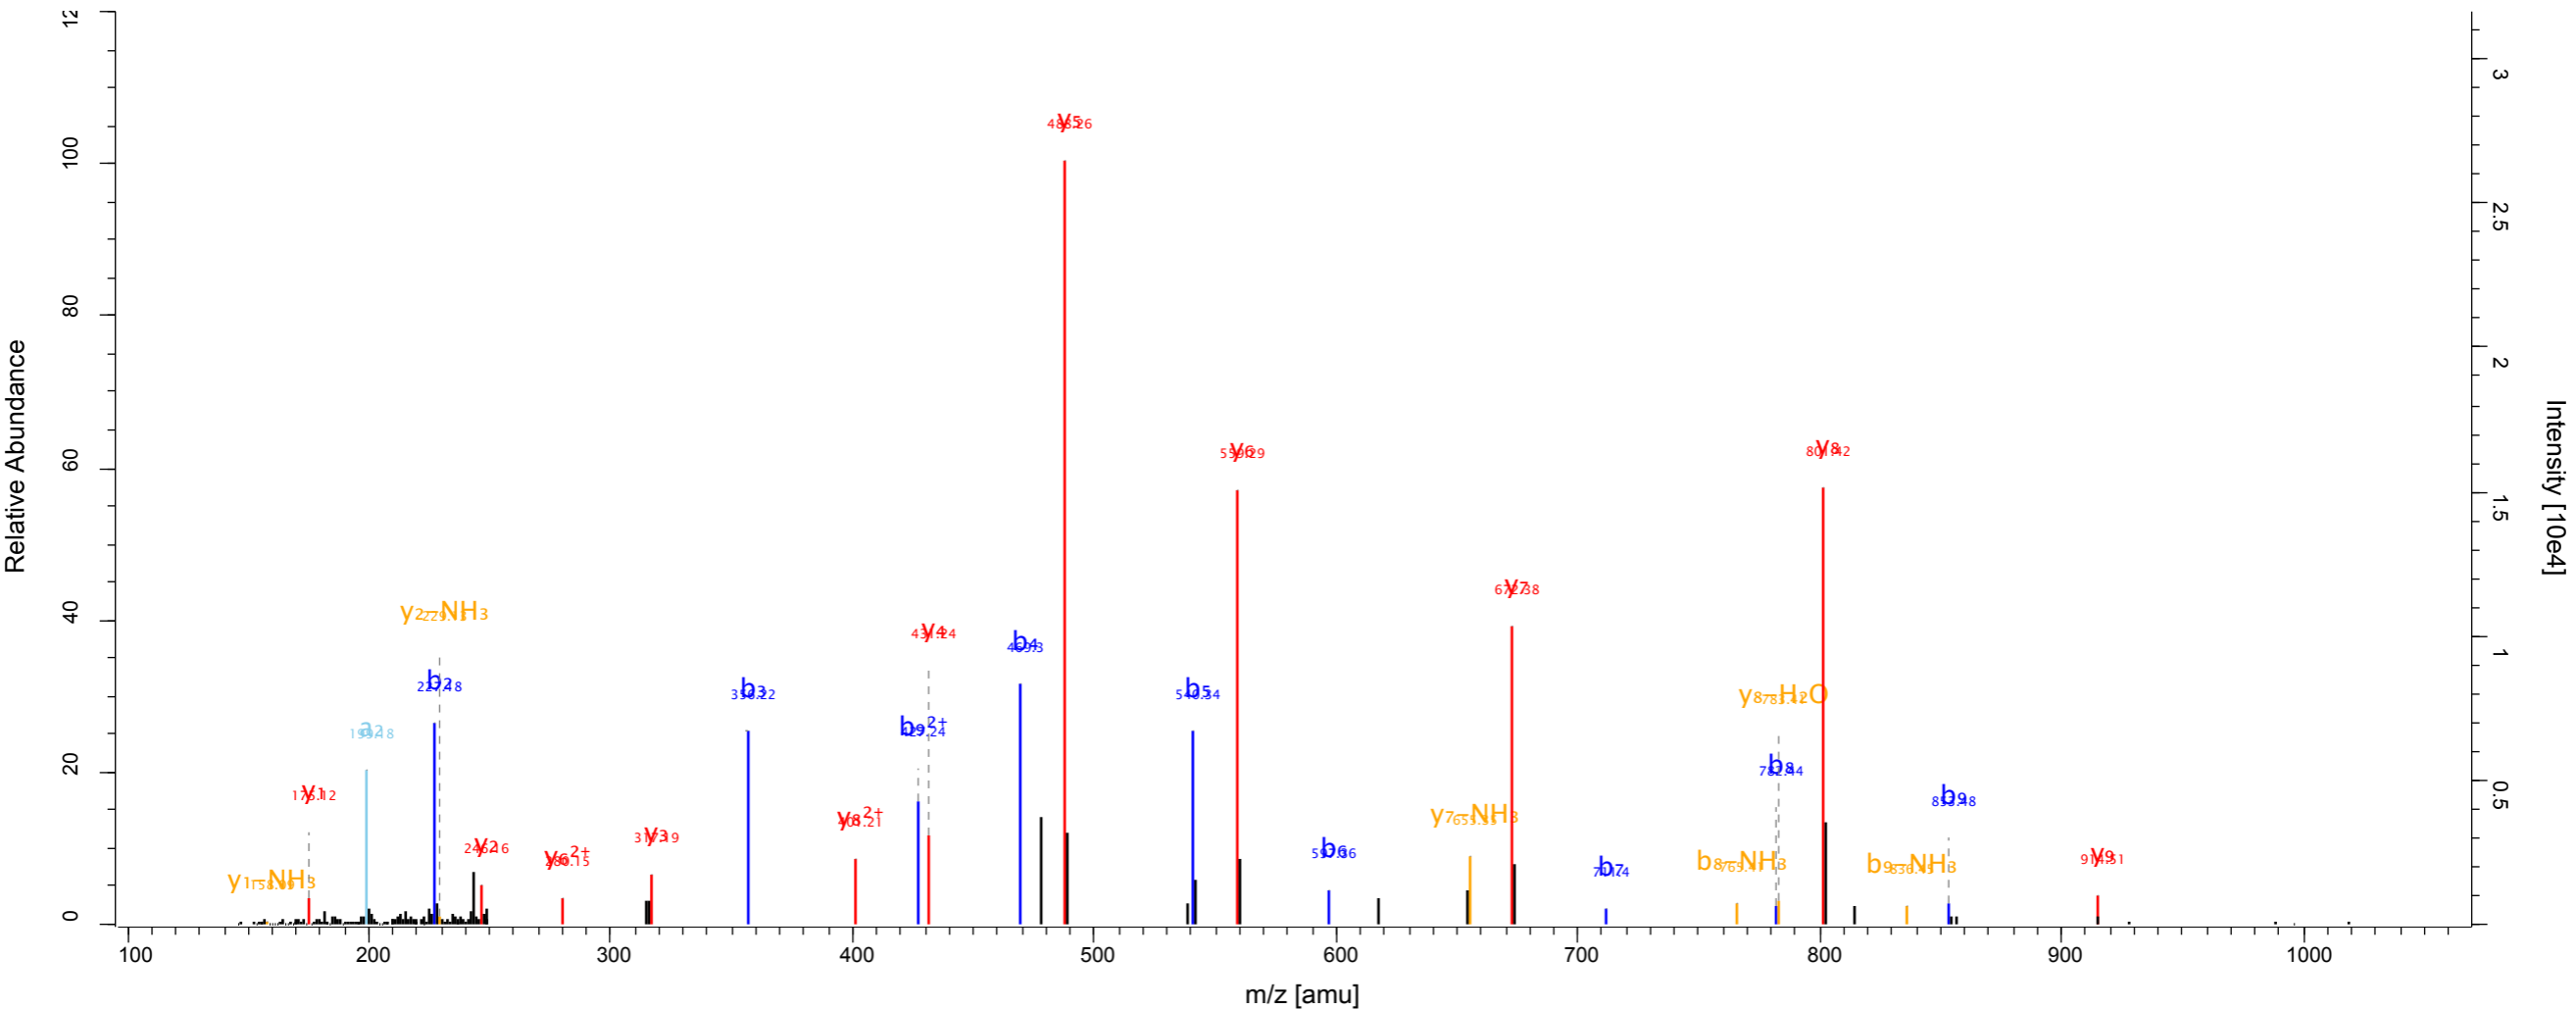

|             |           |          |                                       |
|-------------|-----------|----------|---------------------------------------|
| Scan number | 8491      | Raw file | SKaraca_LMB_Forward_H3_121011_21_rep2 |
| Method      | ITMS; CID | Pepti... | 153.23                                |

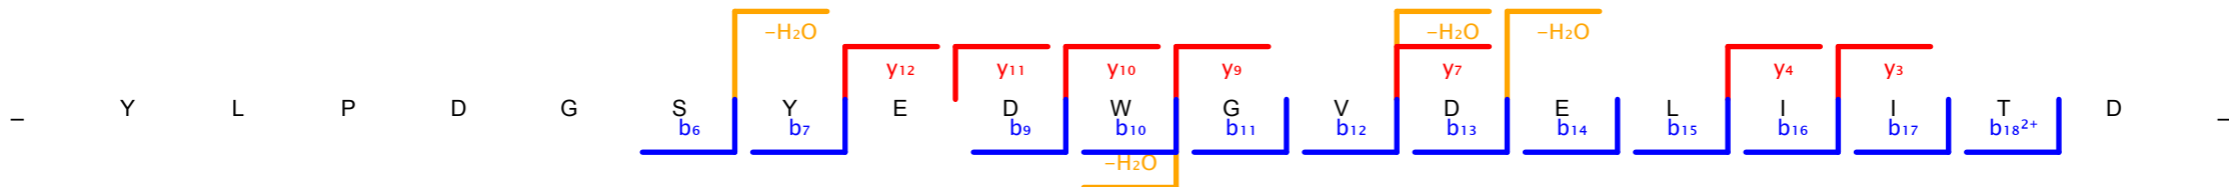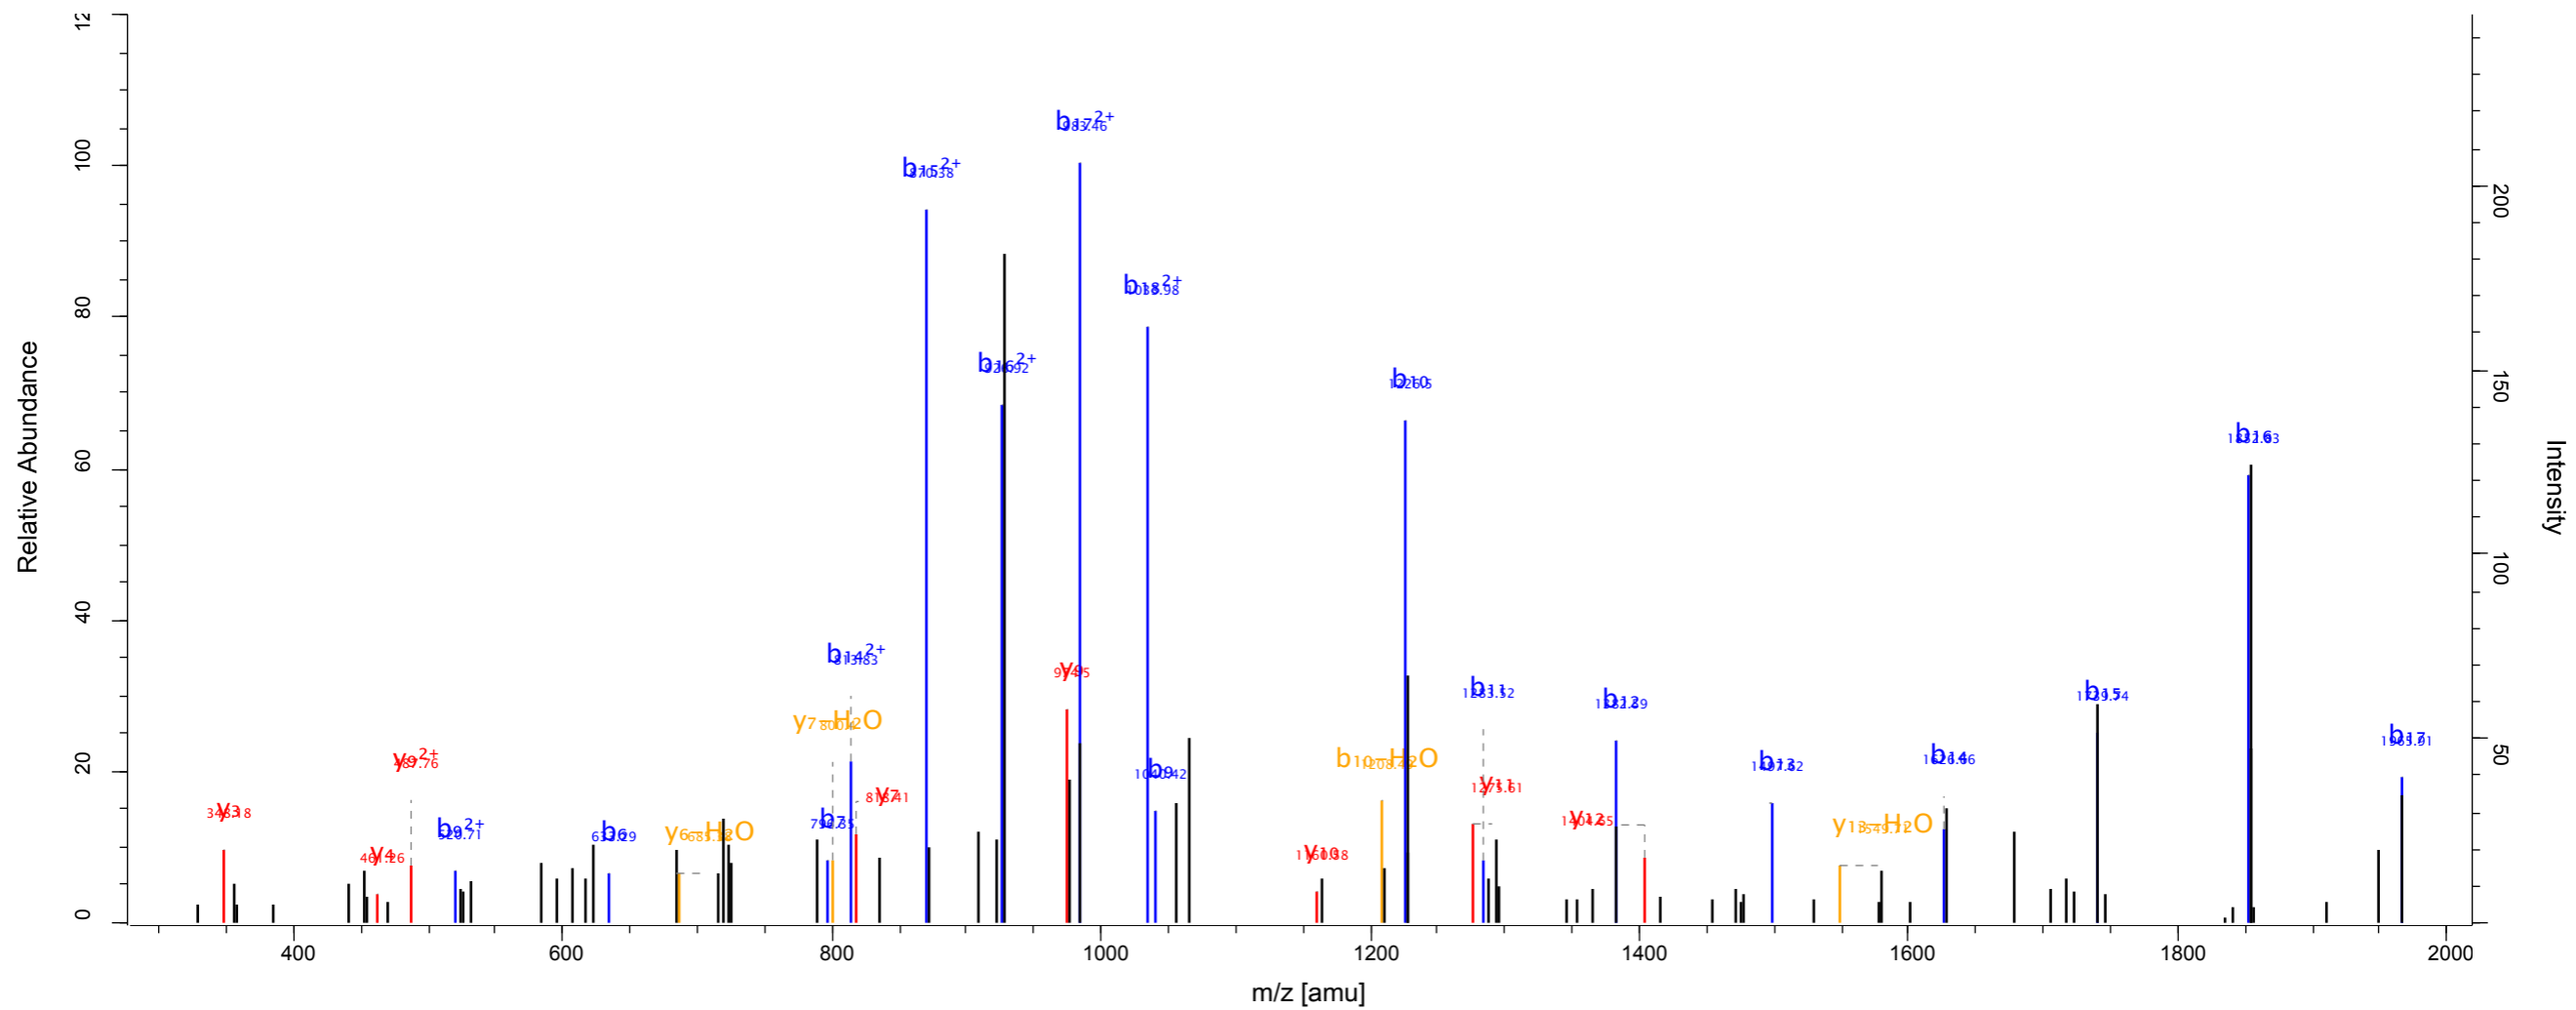

|             |           |          |                                       |
|-------------|-----------|----------|---------------------------------------|
| Scan number | 5050      | Raw file | SKaraca_LMB_Forward_H3_121011_22_rep1 |
| Method      | ITMS; CID | Pepti... | 96.25                                 |

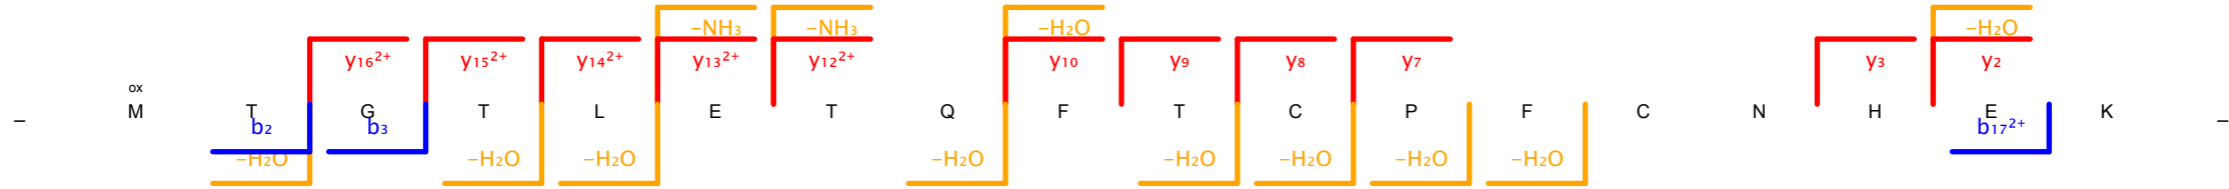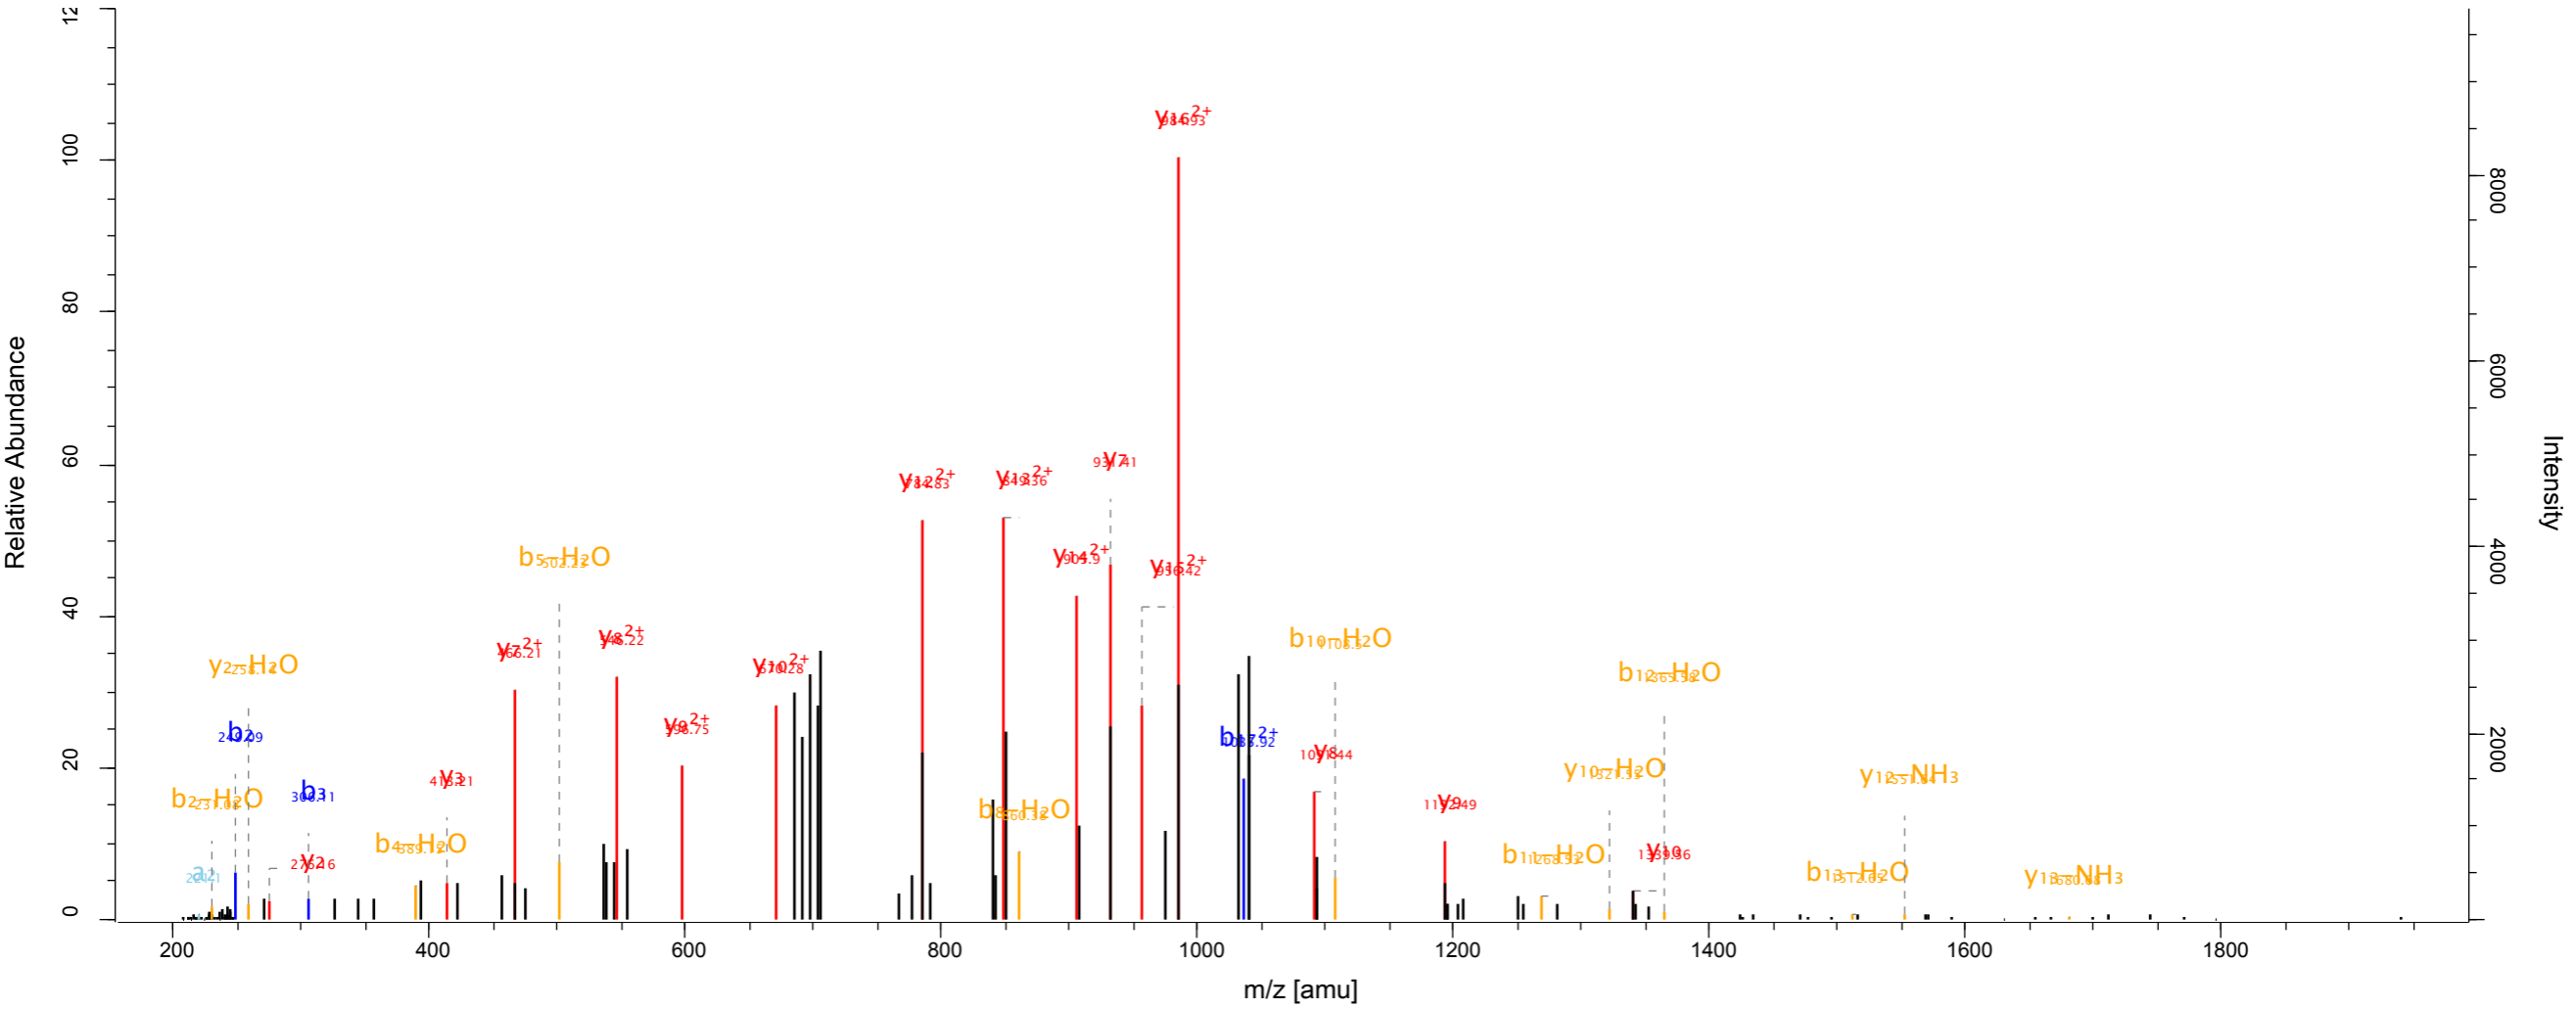

Scan number 5410 Raw file SKaraca\_LMB\_Forward\_H3\_121011\_22\_rep1  
 Method ITMS; CID Pepti... 81.66

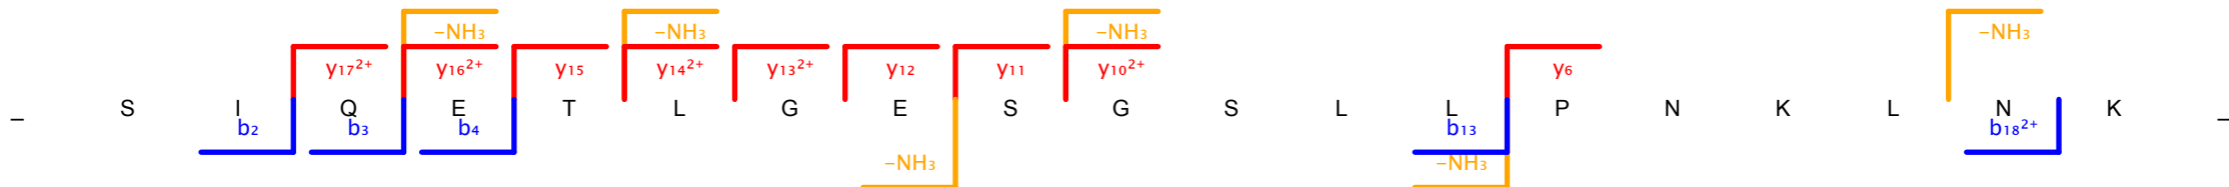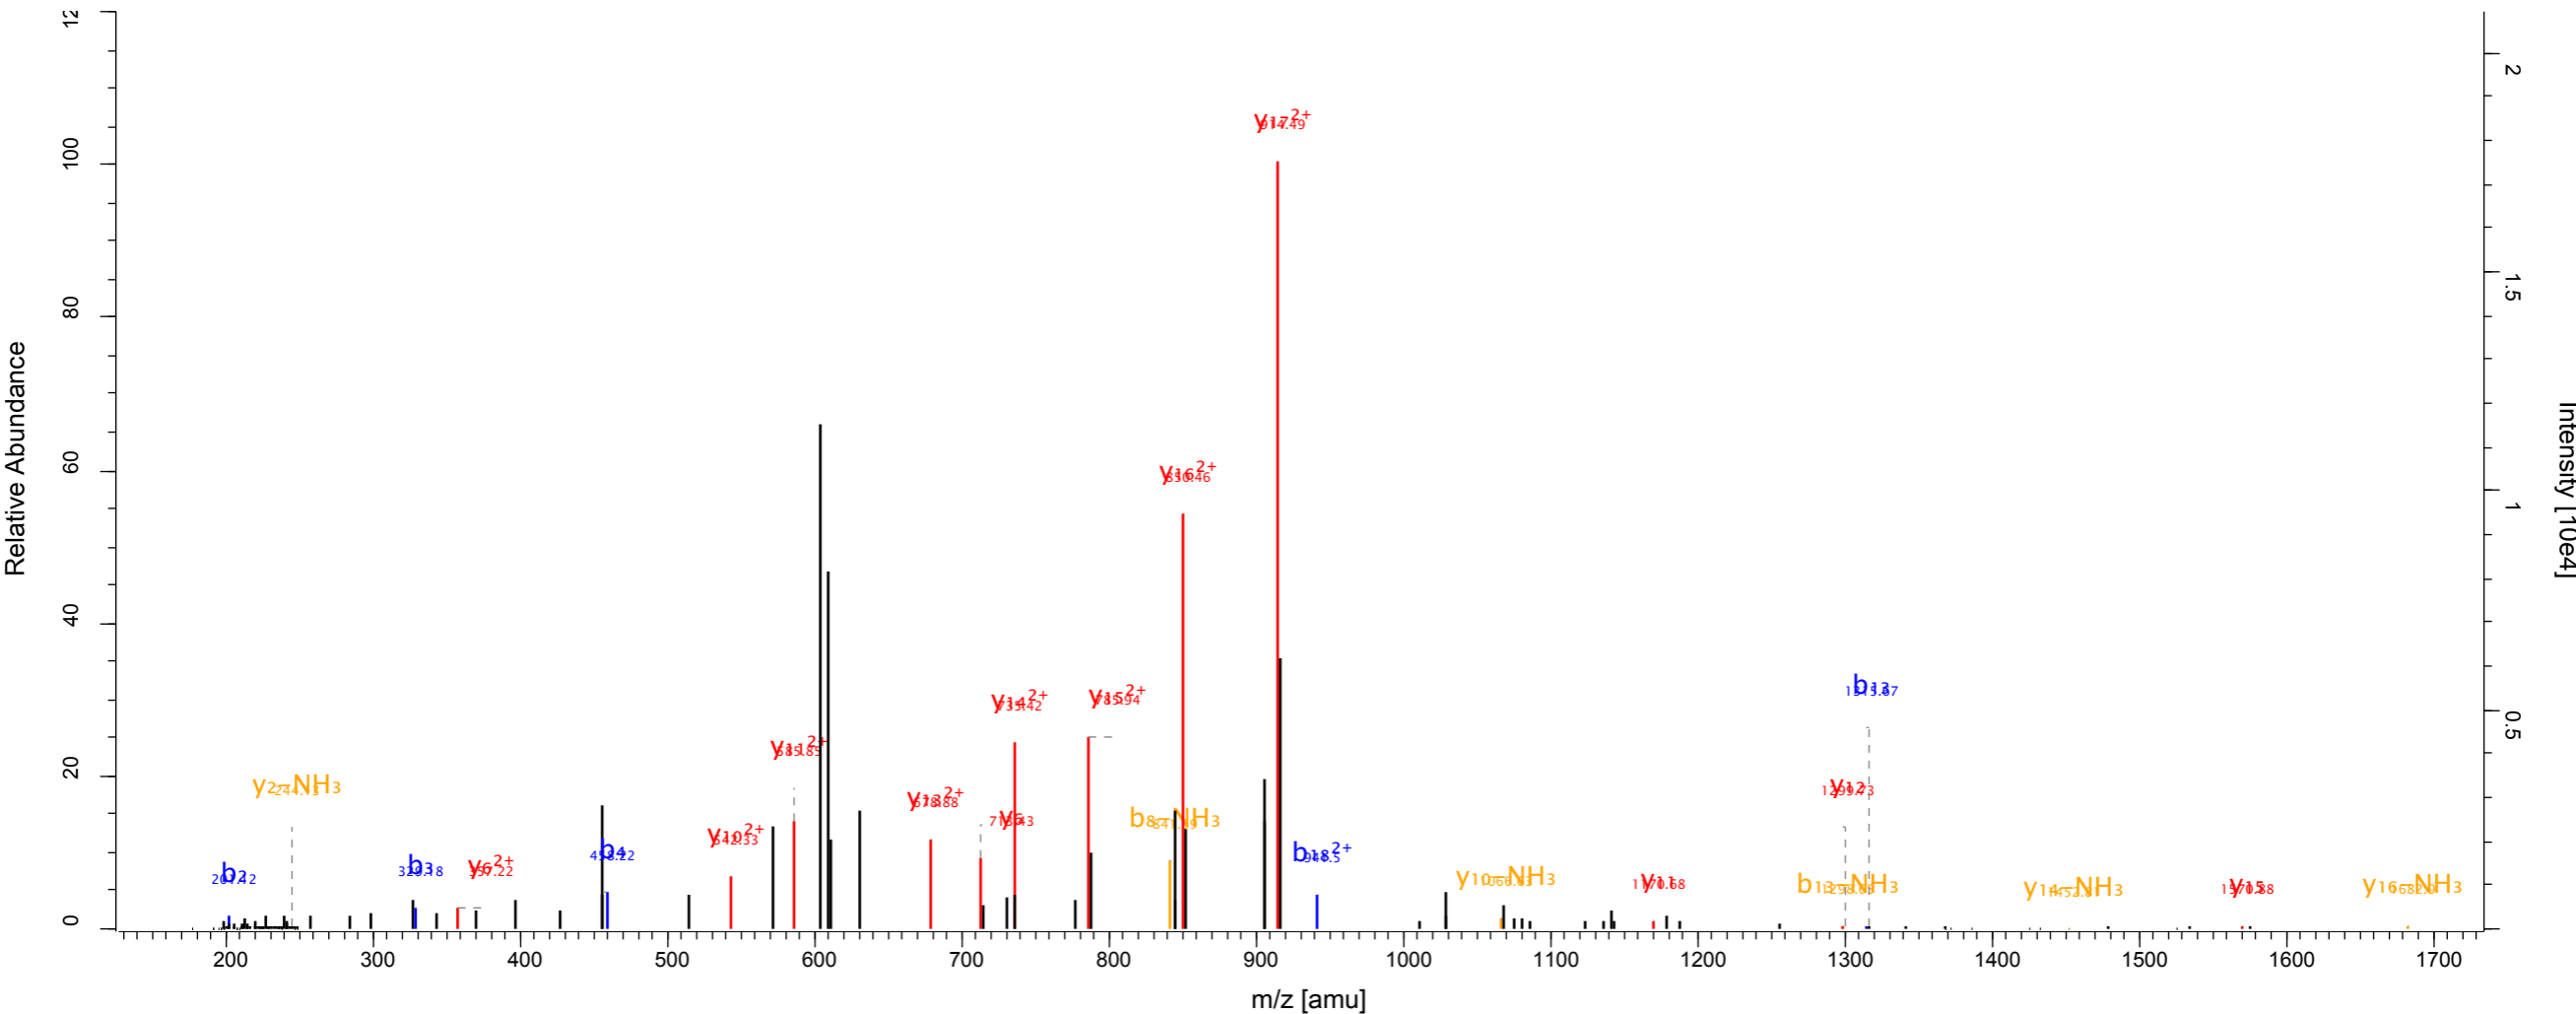



Scan number 6669 Raw file SKaraca\_LMB\_Forward\_H3\_121011\_22\_rep2  
Method ITMS; CID Pepti... 126.19

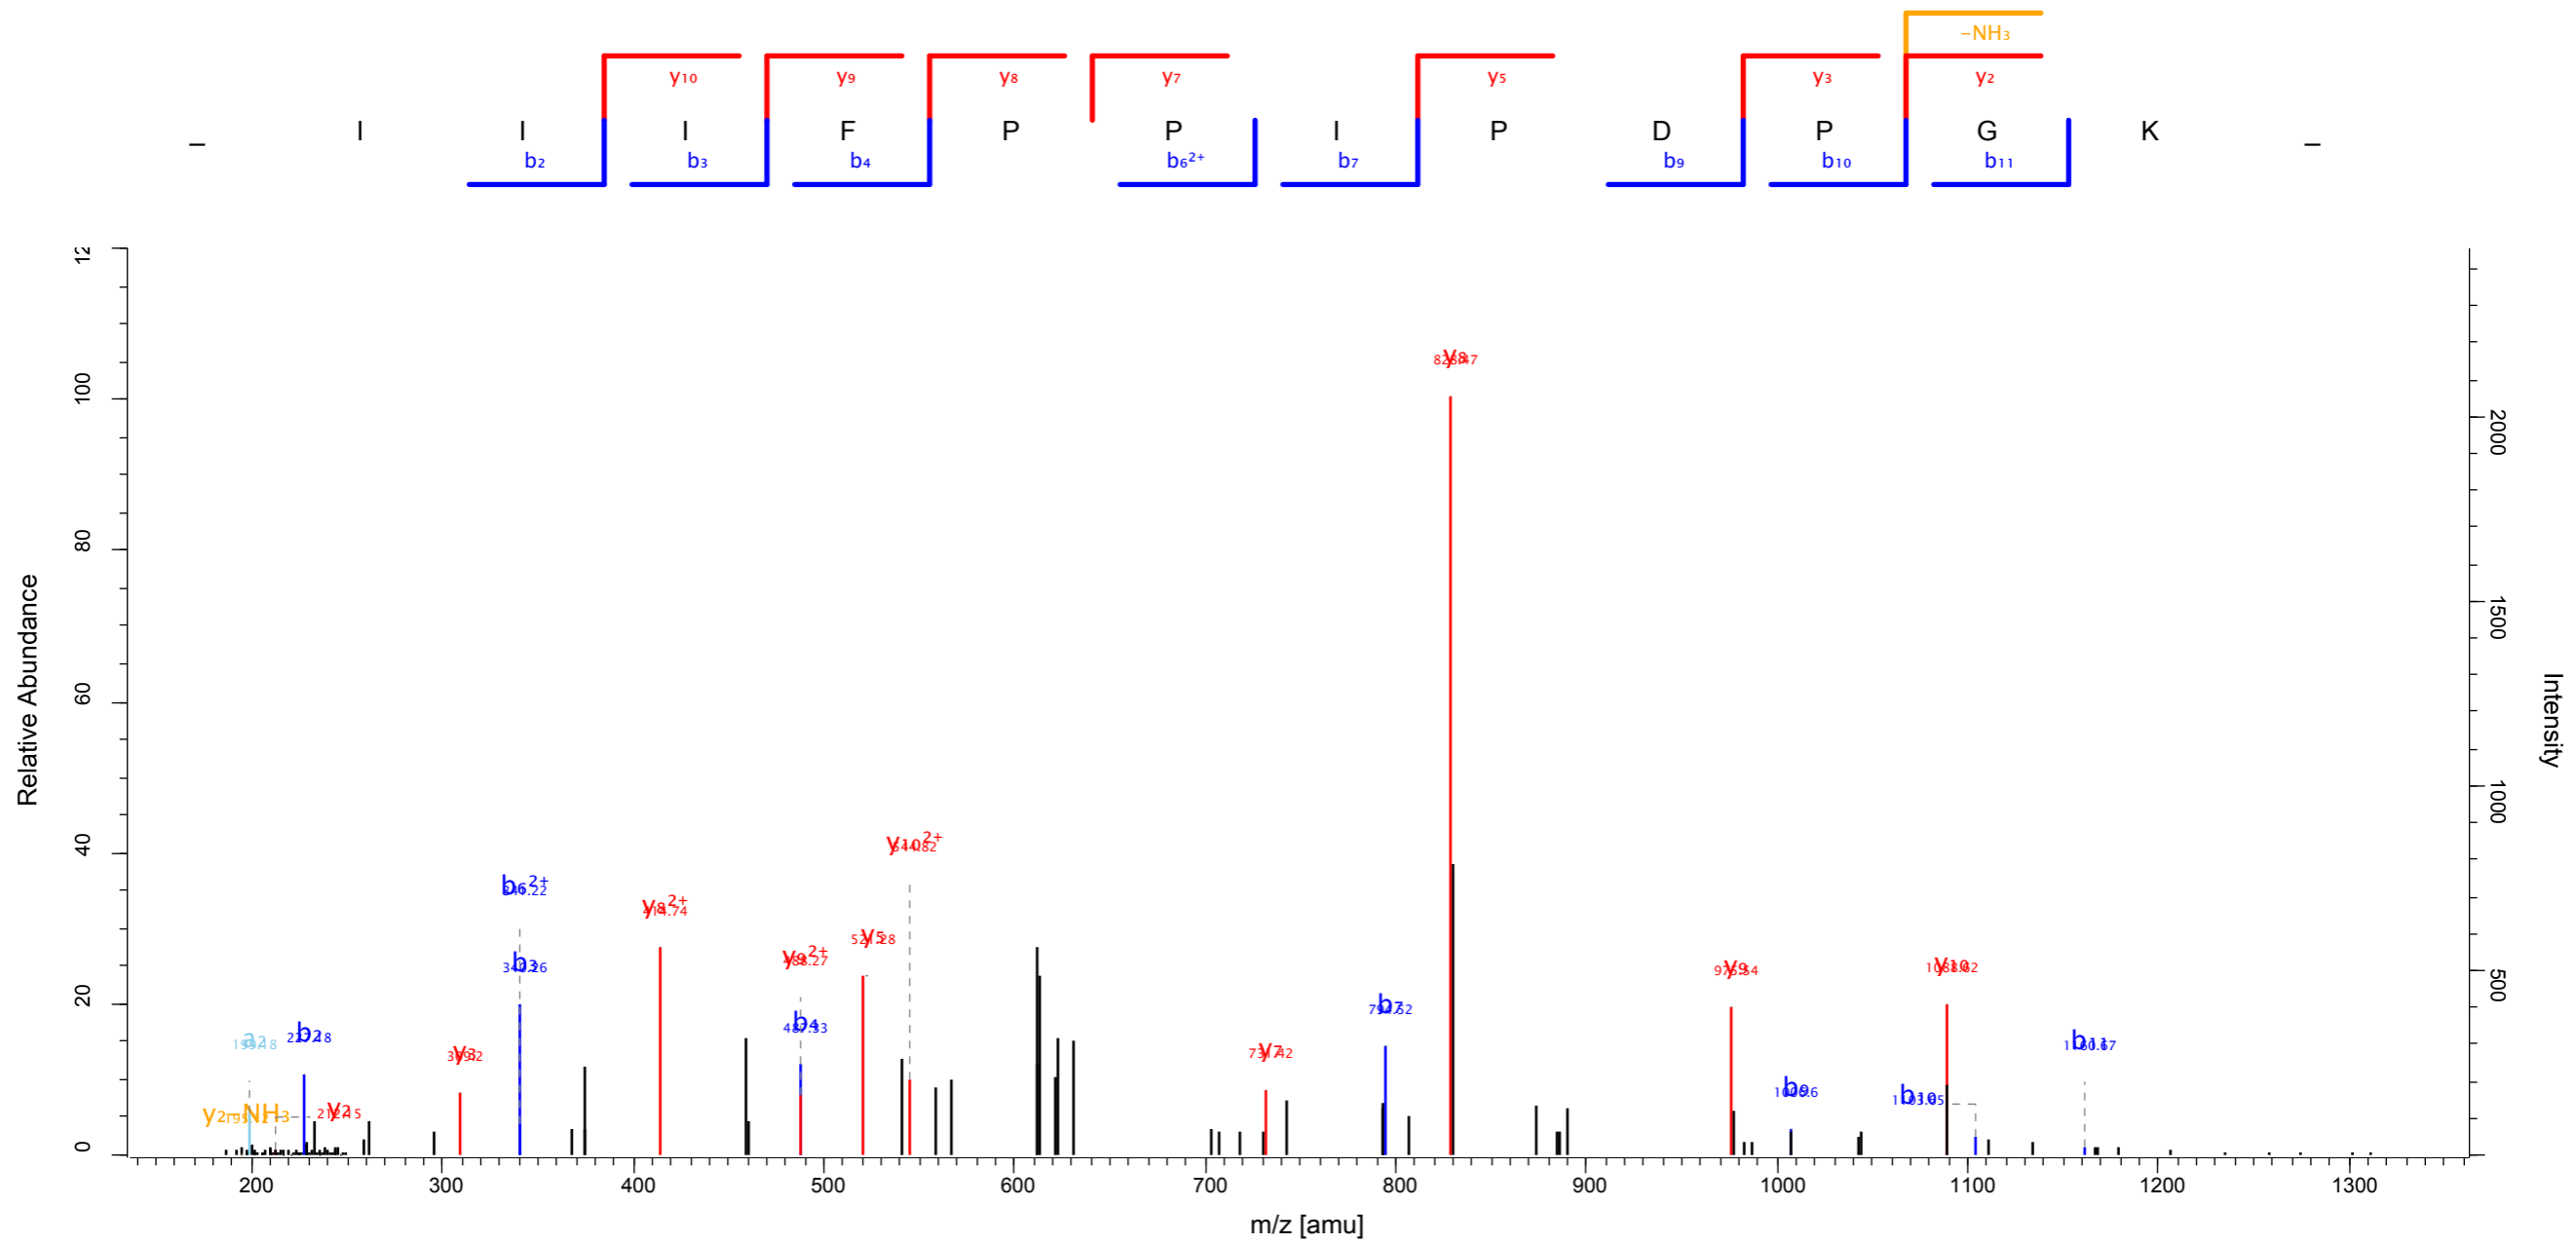

Scan number 4652 Raw file SKaraca\_LMB\_Forward\_H3\_121011\_23\_rep1  
 Method ITMS; CID Pepti... 164.41

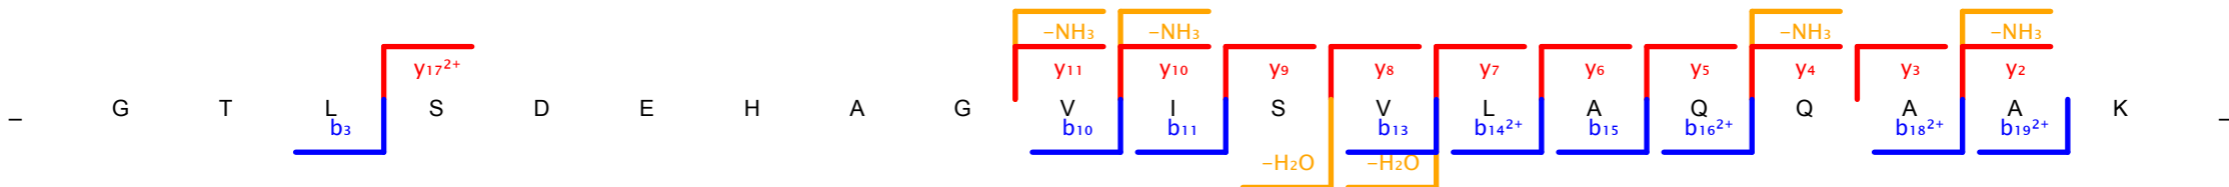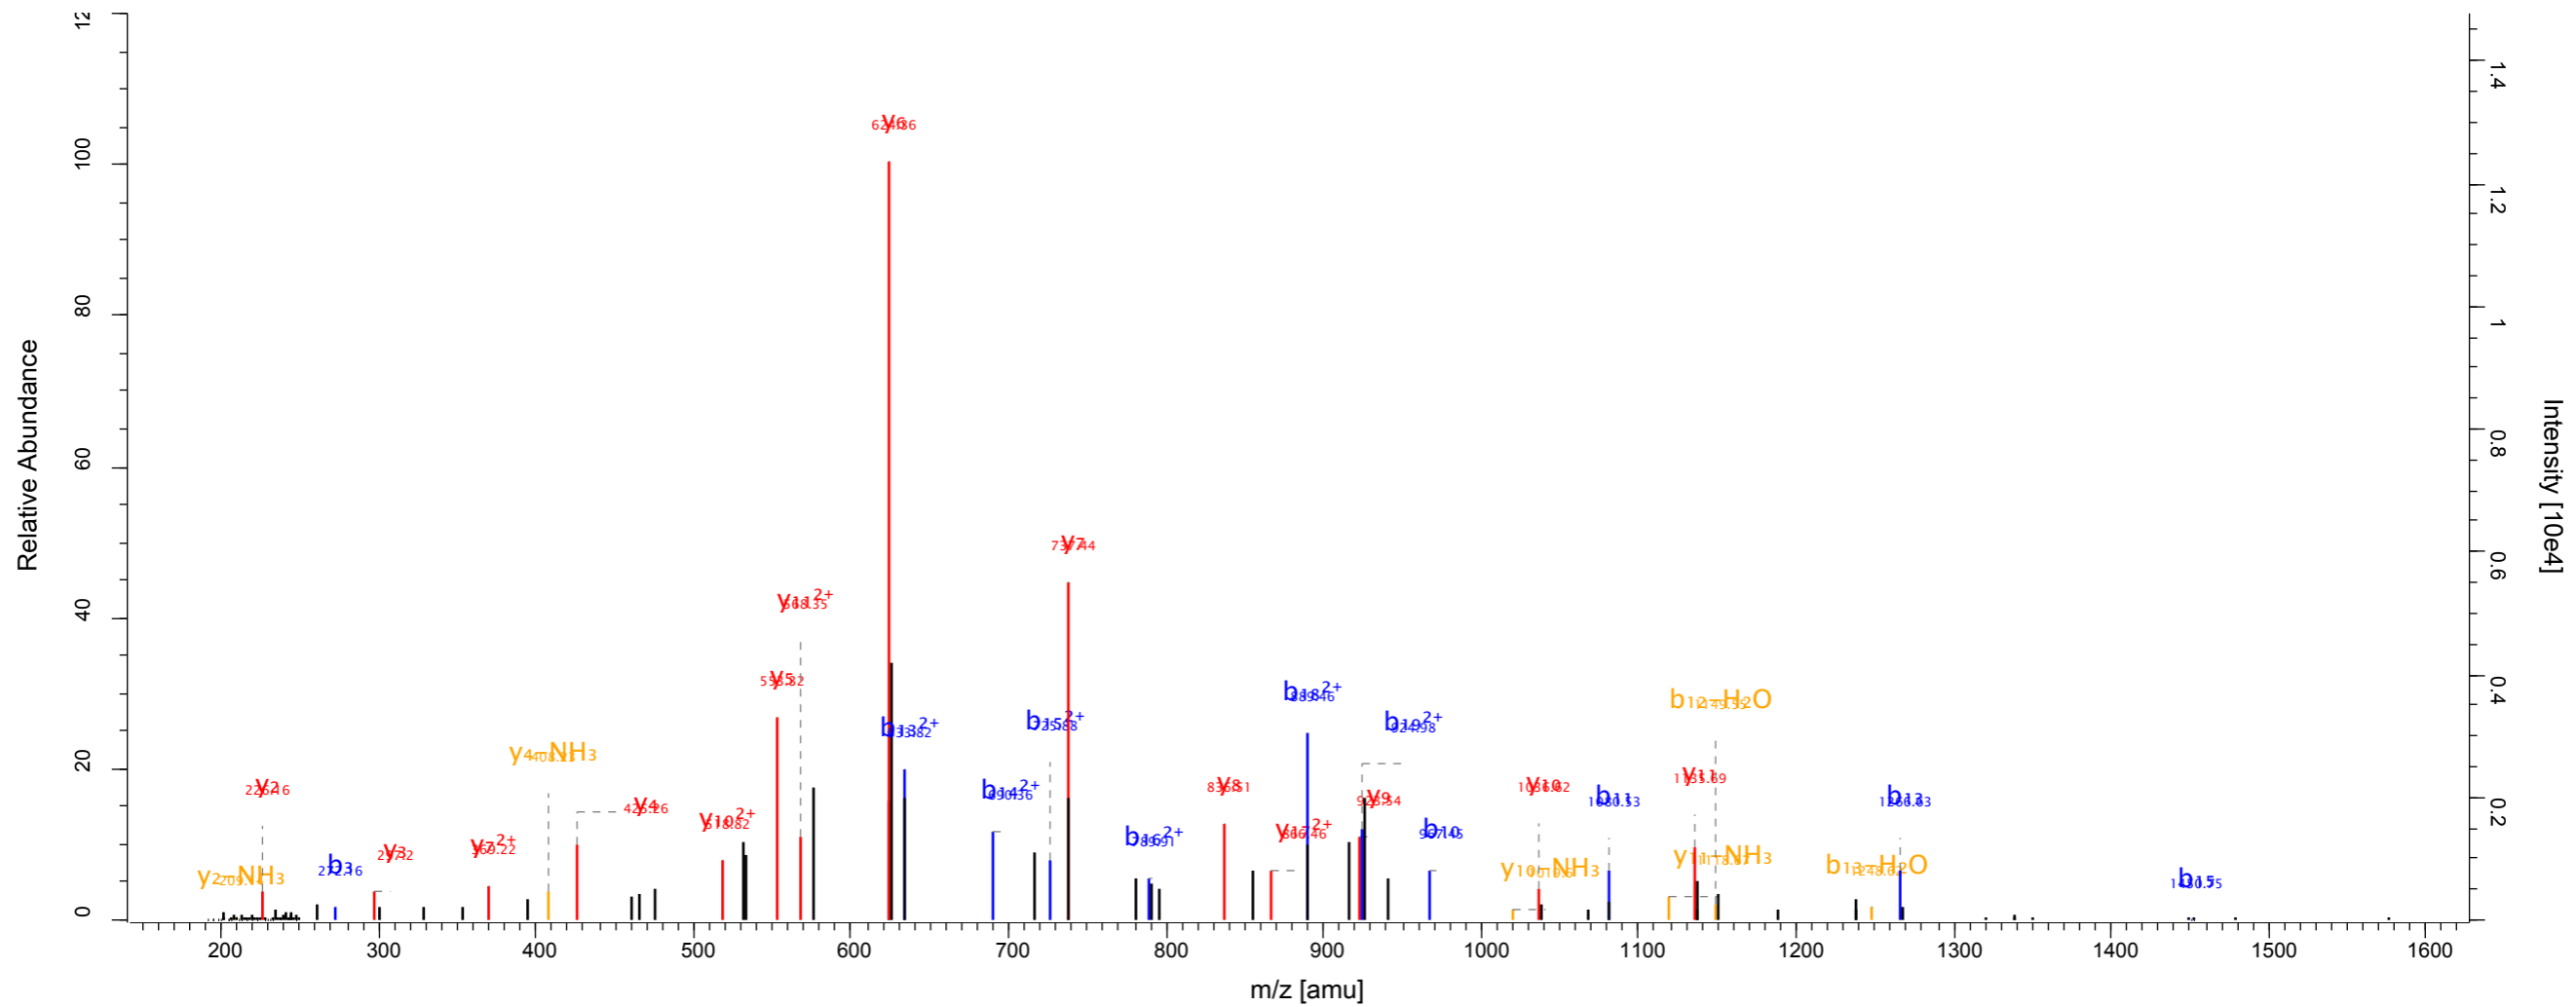

Scan number 5562 Raw file SKaraca\_LMB\_Forward\_H3\_121011\_23\_rep2  
Method ITMS; CID Pepti... 127.68

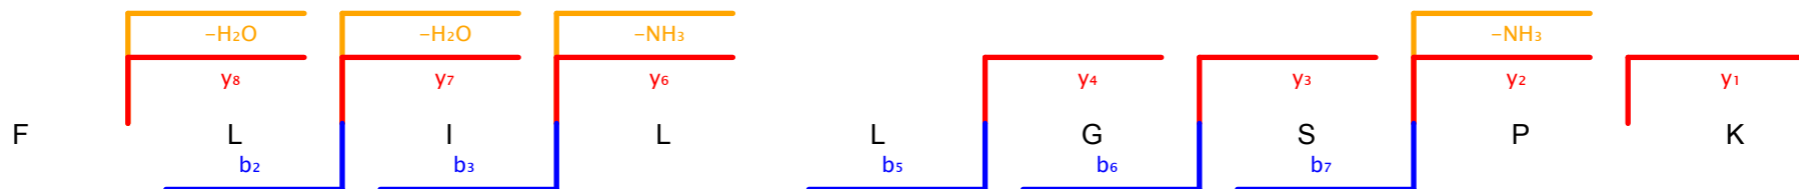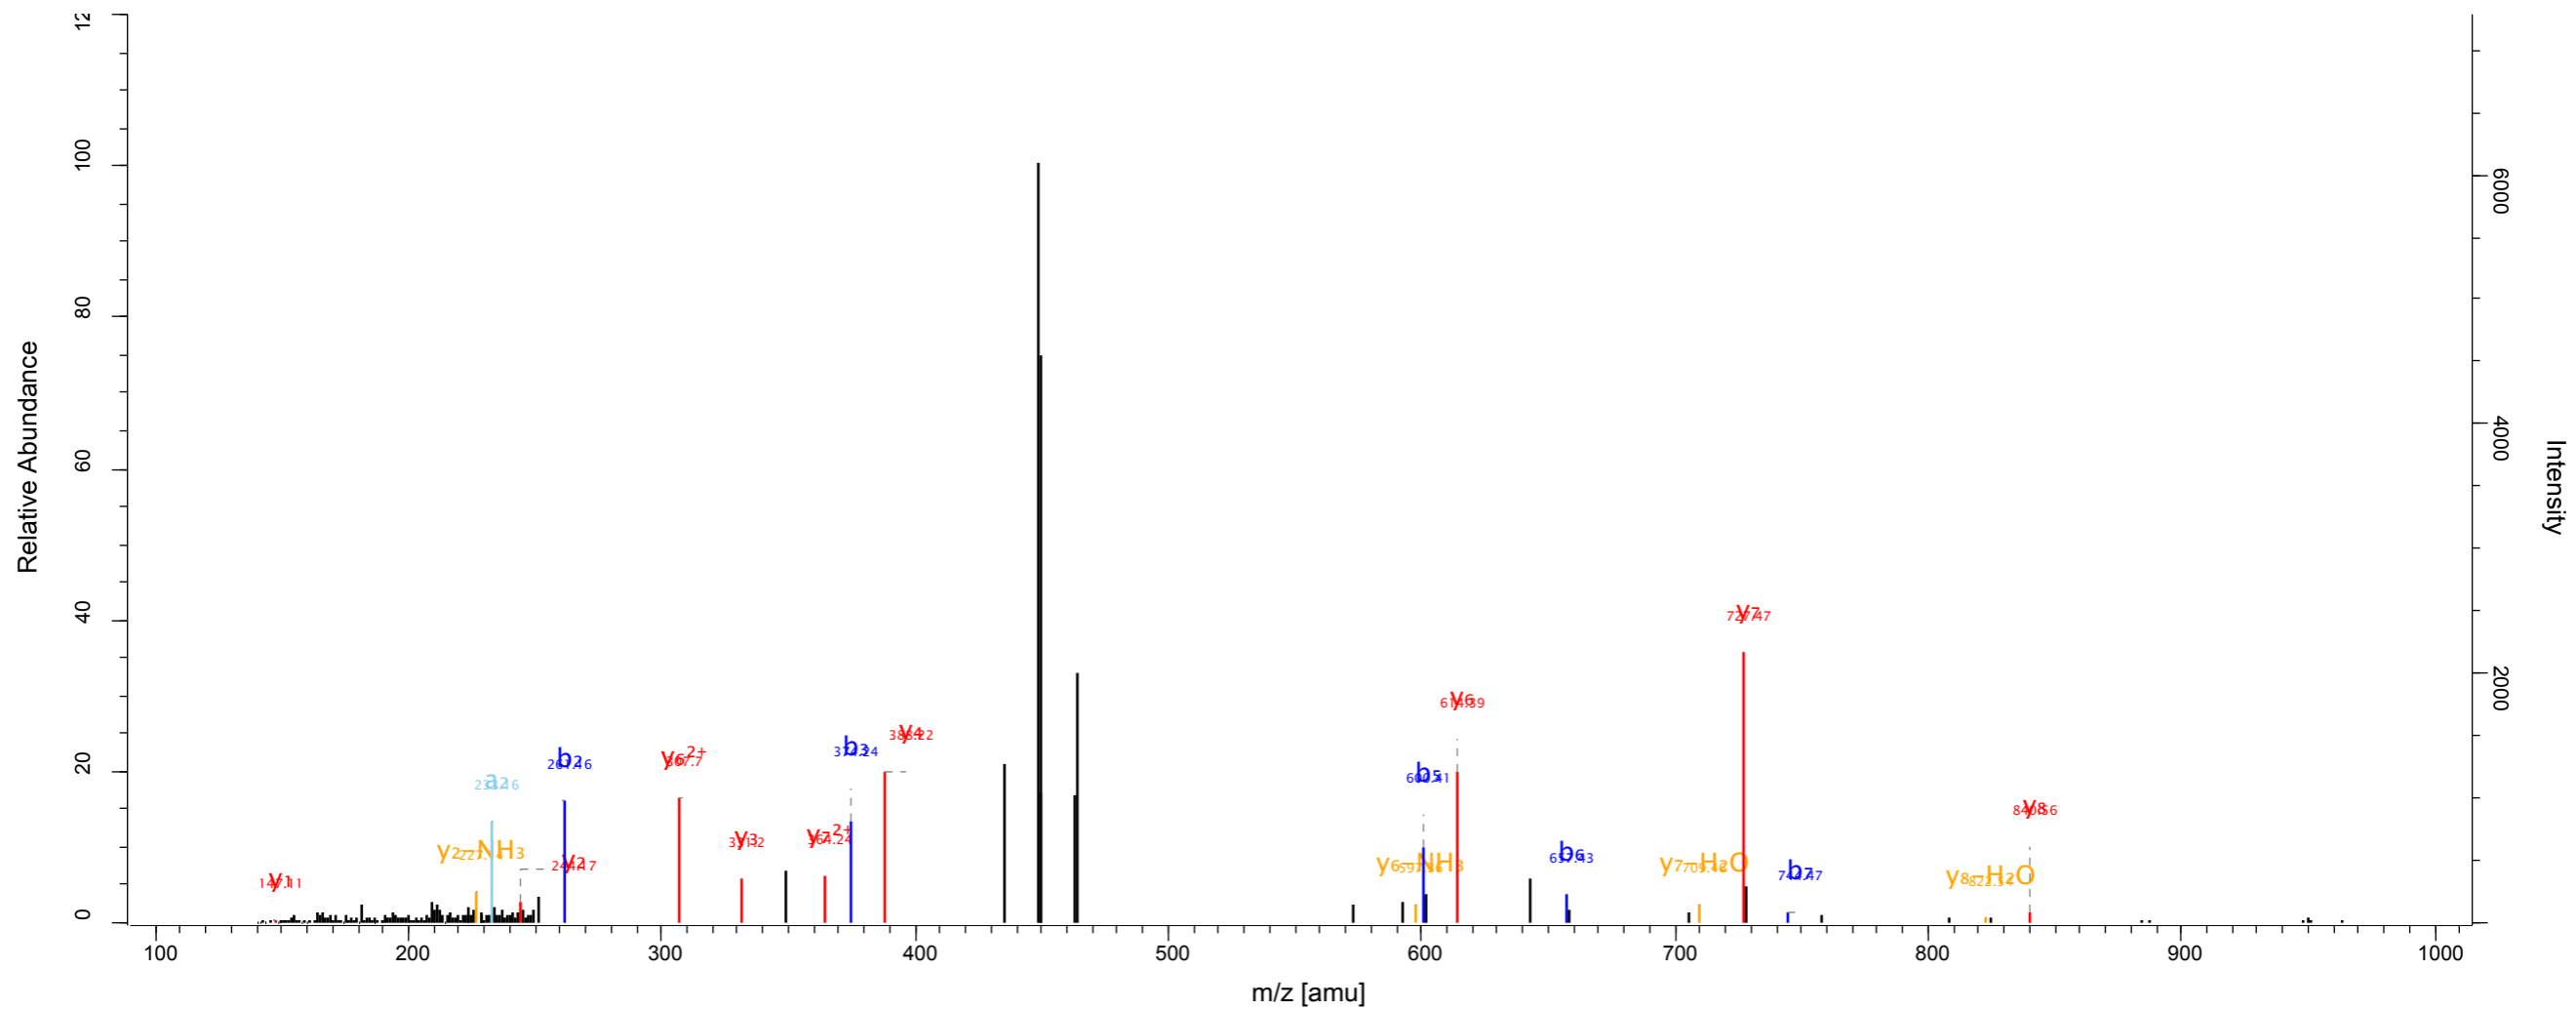

|             |           |          |                                      |
|-------------|-----------|----------|--------------------------------------|
| Scan number | 9087      | Raw file | SKaraca_LMB_Forward_H3_121011_4_rep1 |
| Method      | ITMS; CID | Pepti... | 83.42                                |

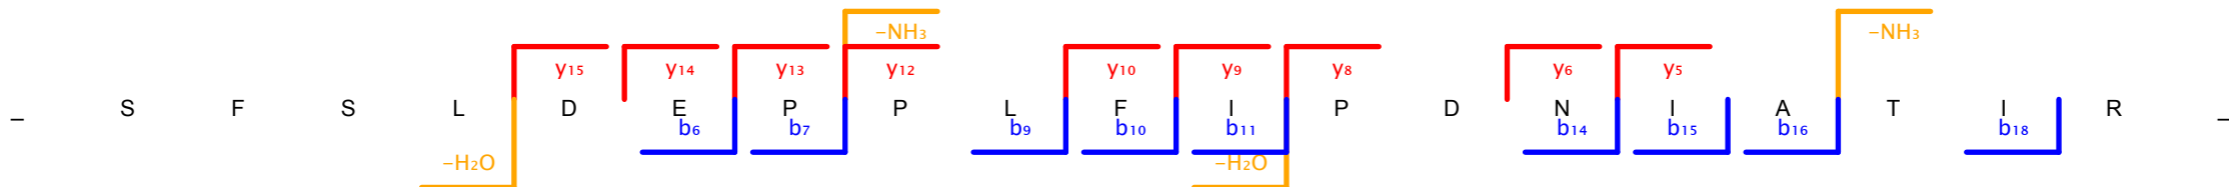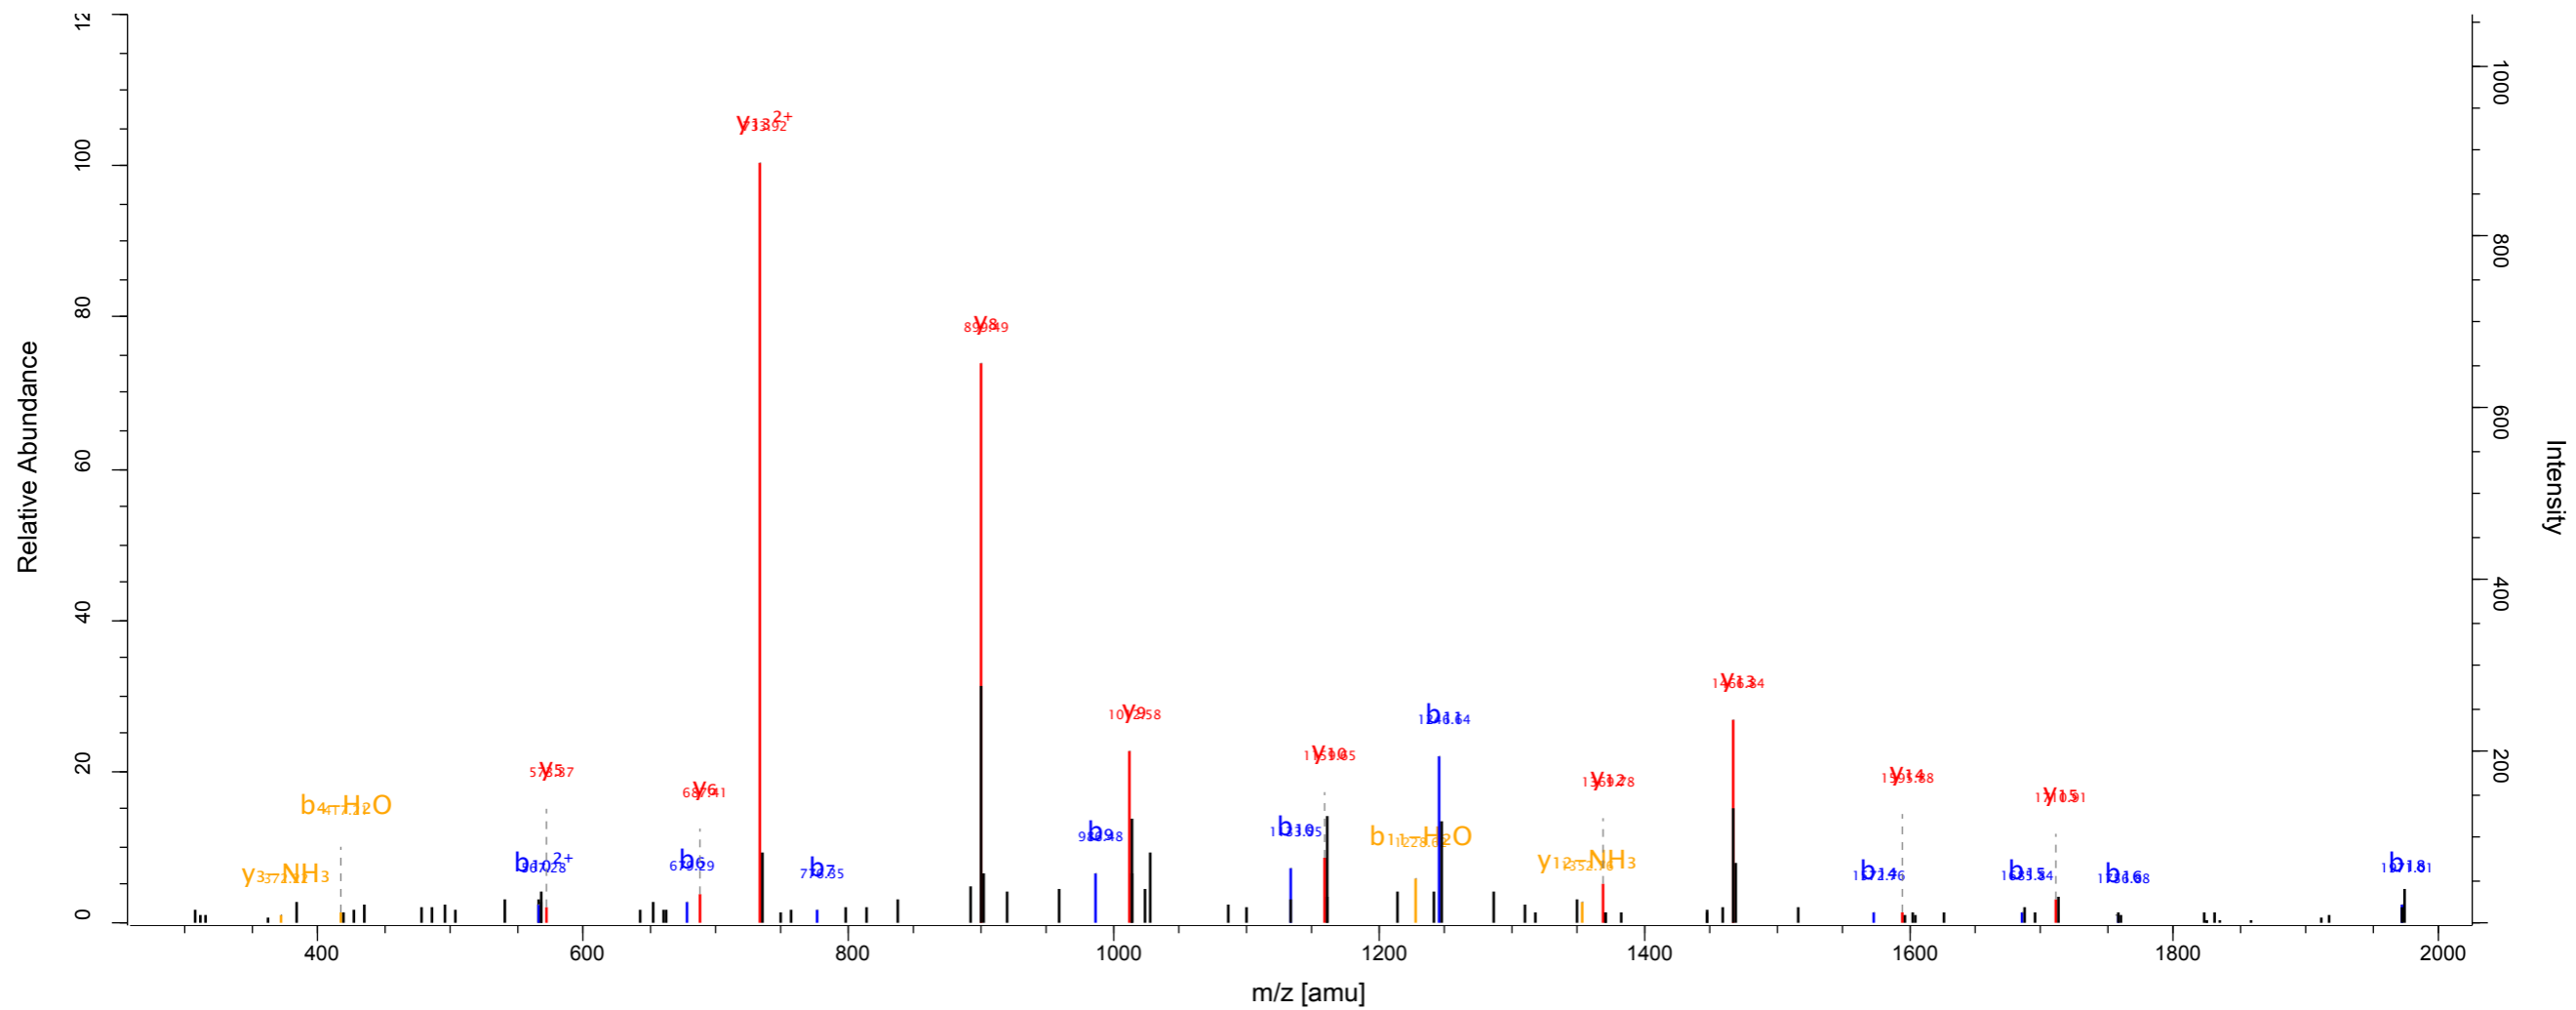

Scan number 8566 Raw file SKaraca\_LMB\_Forward\_H3\_121011\_6\_rep1  
 Method ITMS; CID Pepti... 153.94

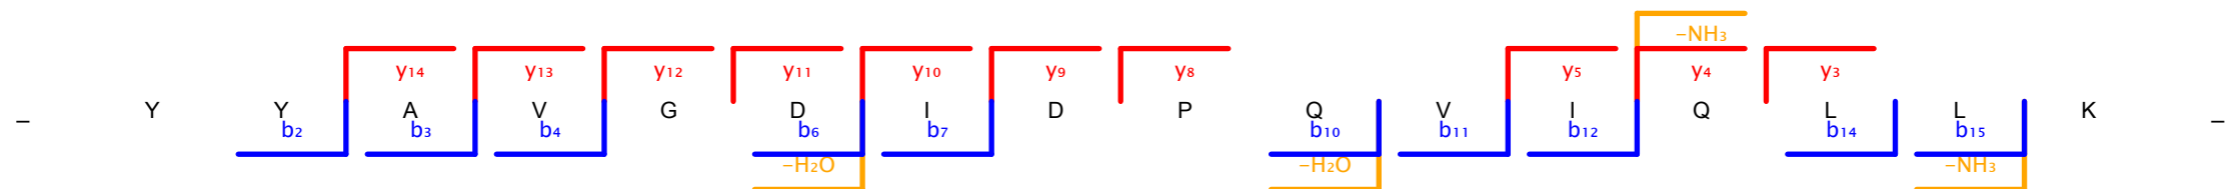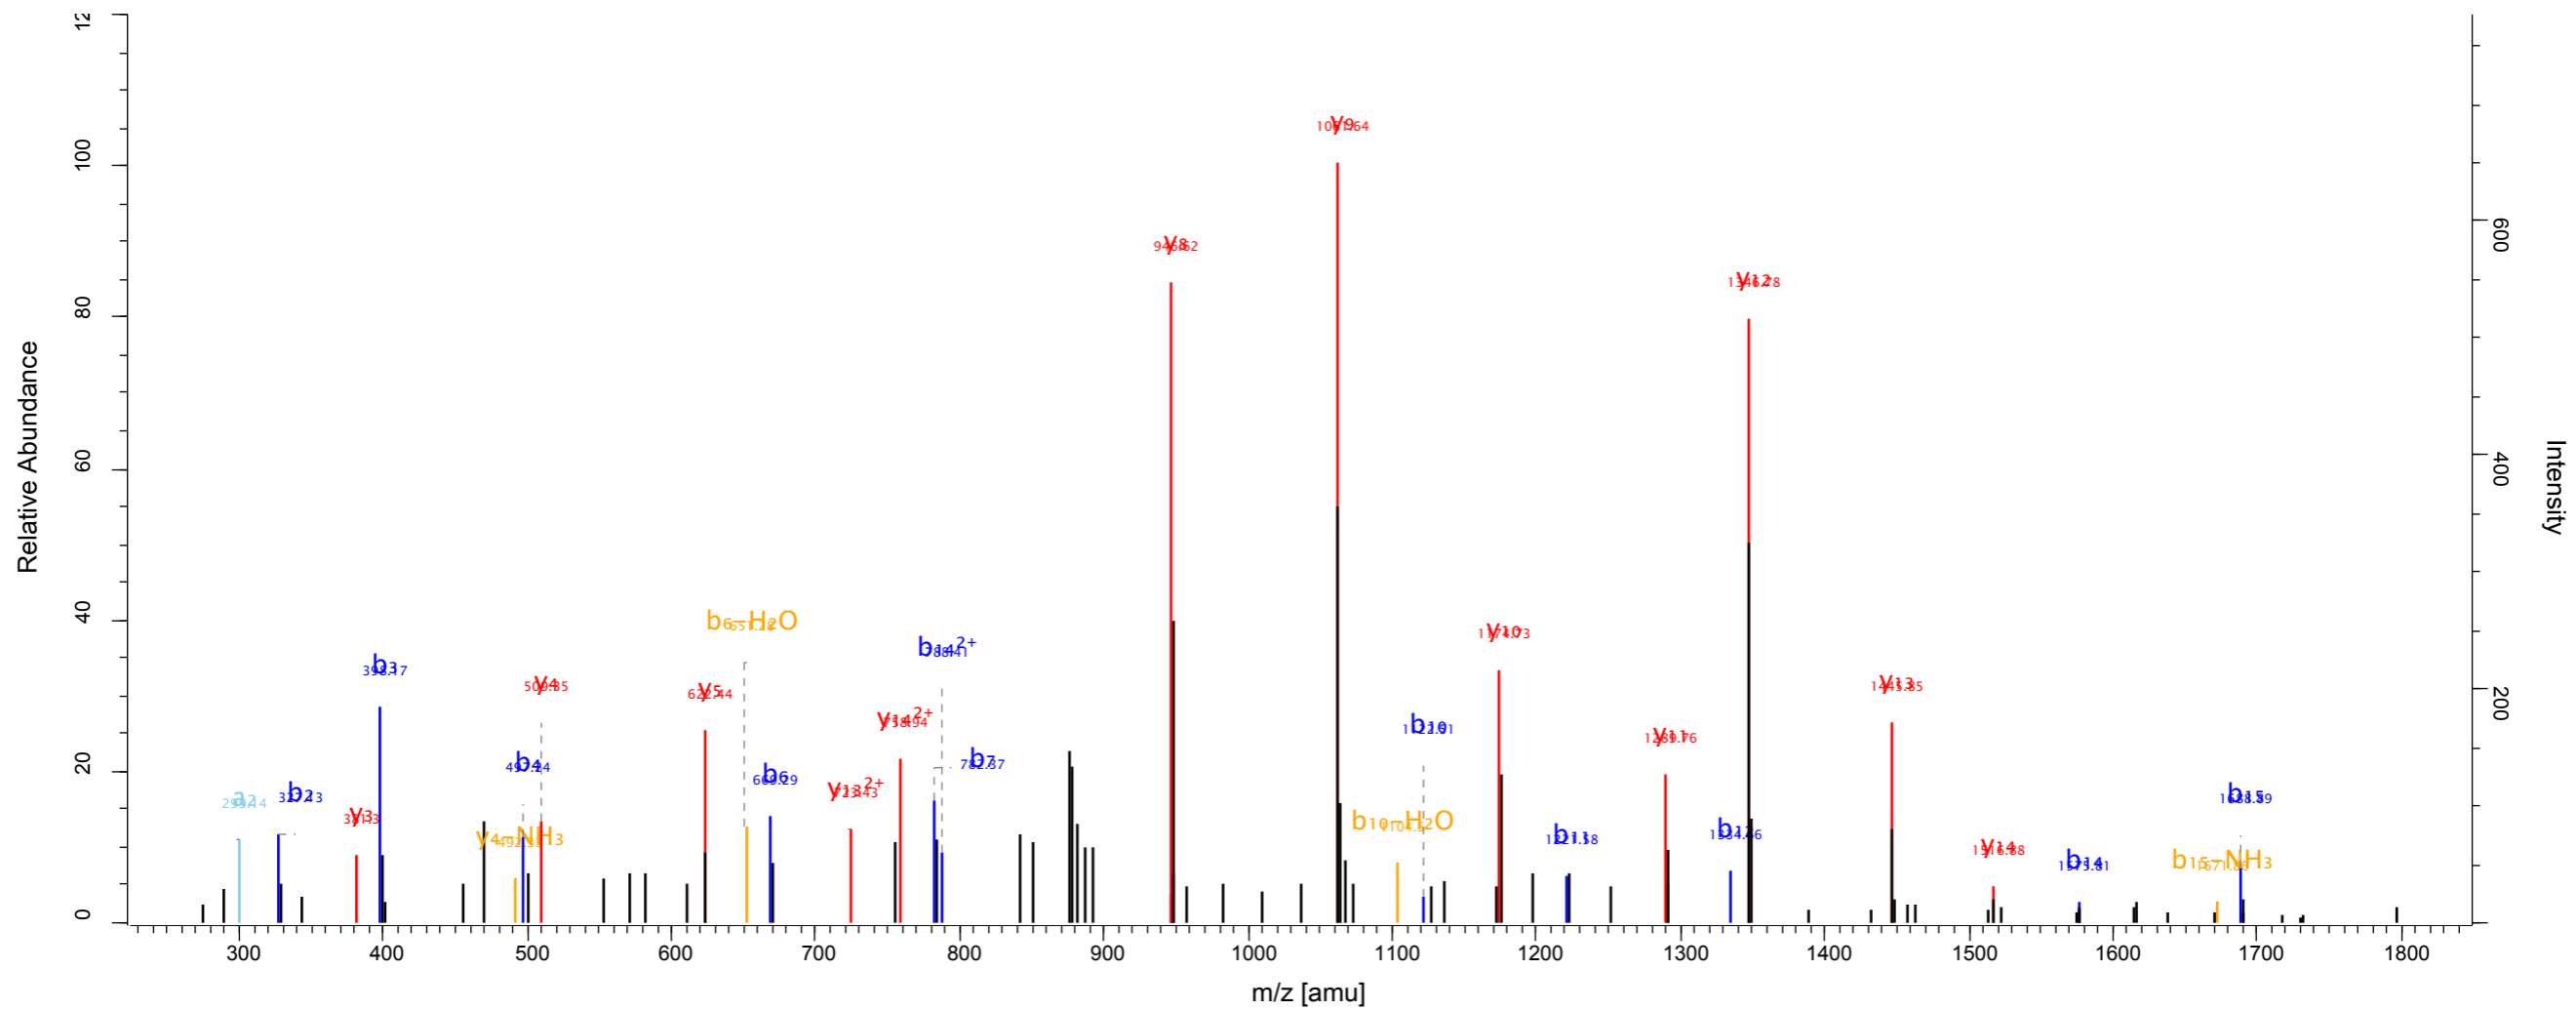

Scan number 8645 Raw file SKaraca\_LMB\_Forward\_H3\_121011\_6\_rep1  
 Method ITMS; CID Pepti... 79.36

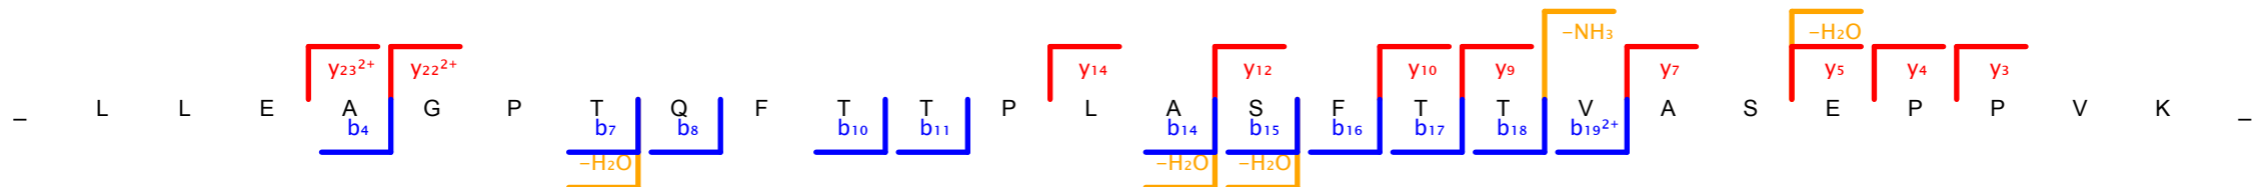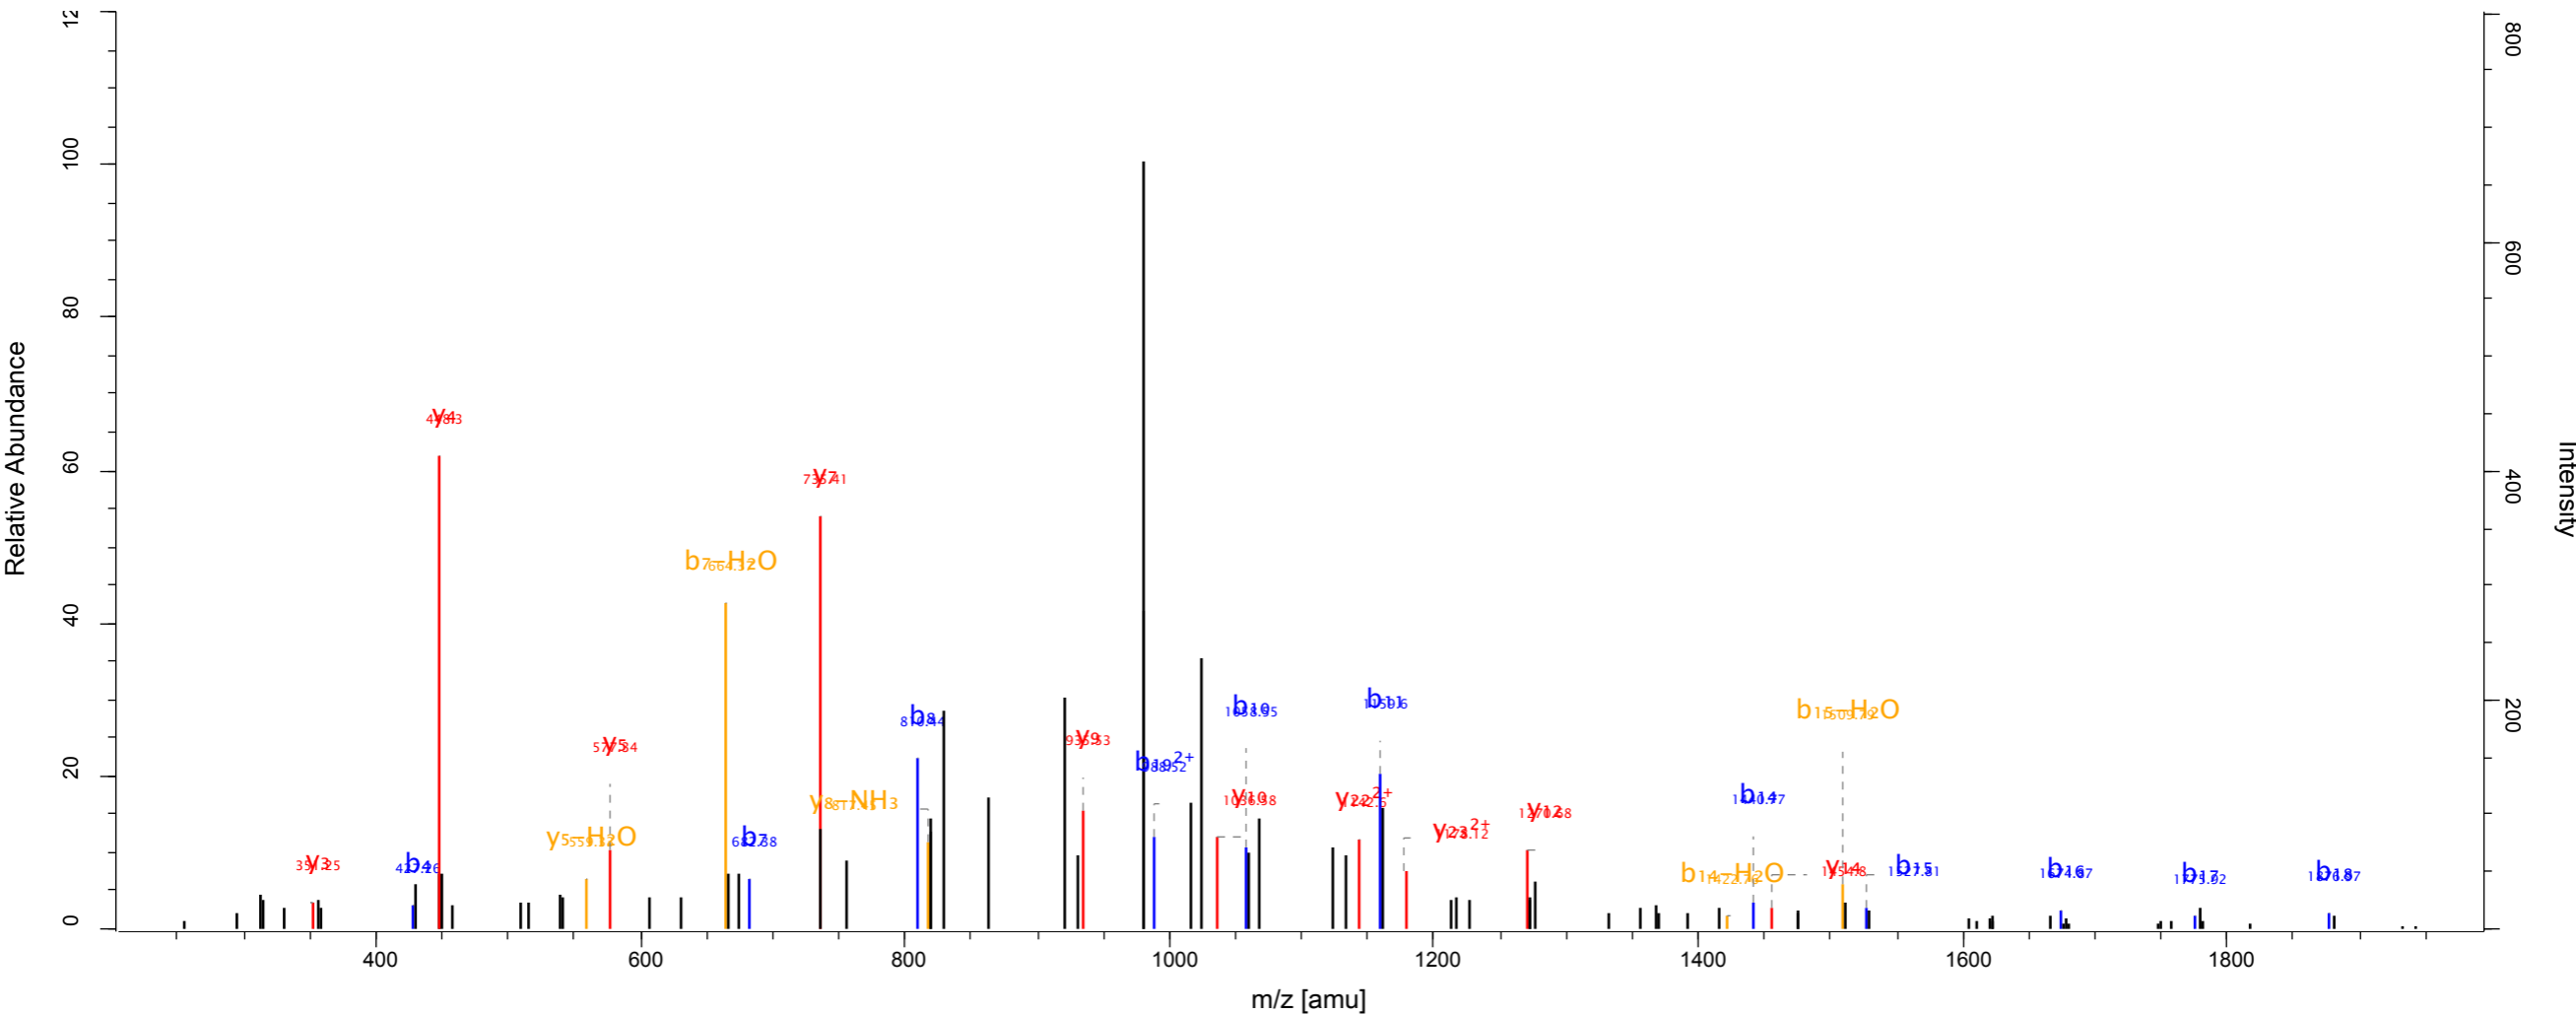

Scan number 6795 Raw file SKaraca\_LMB\_Forward\_H3\_121011\_7\_rep1  
 Method ITMS; CID Pepti... 160.04

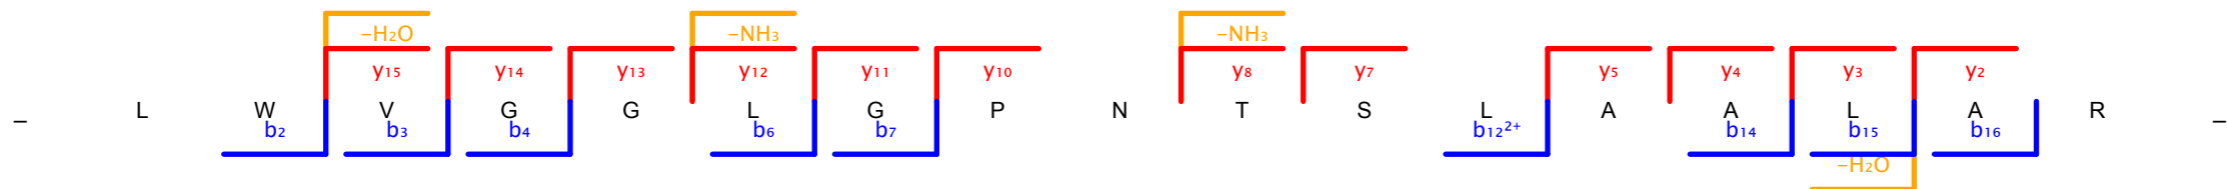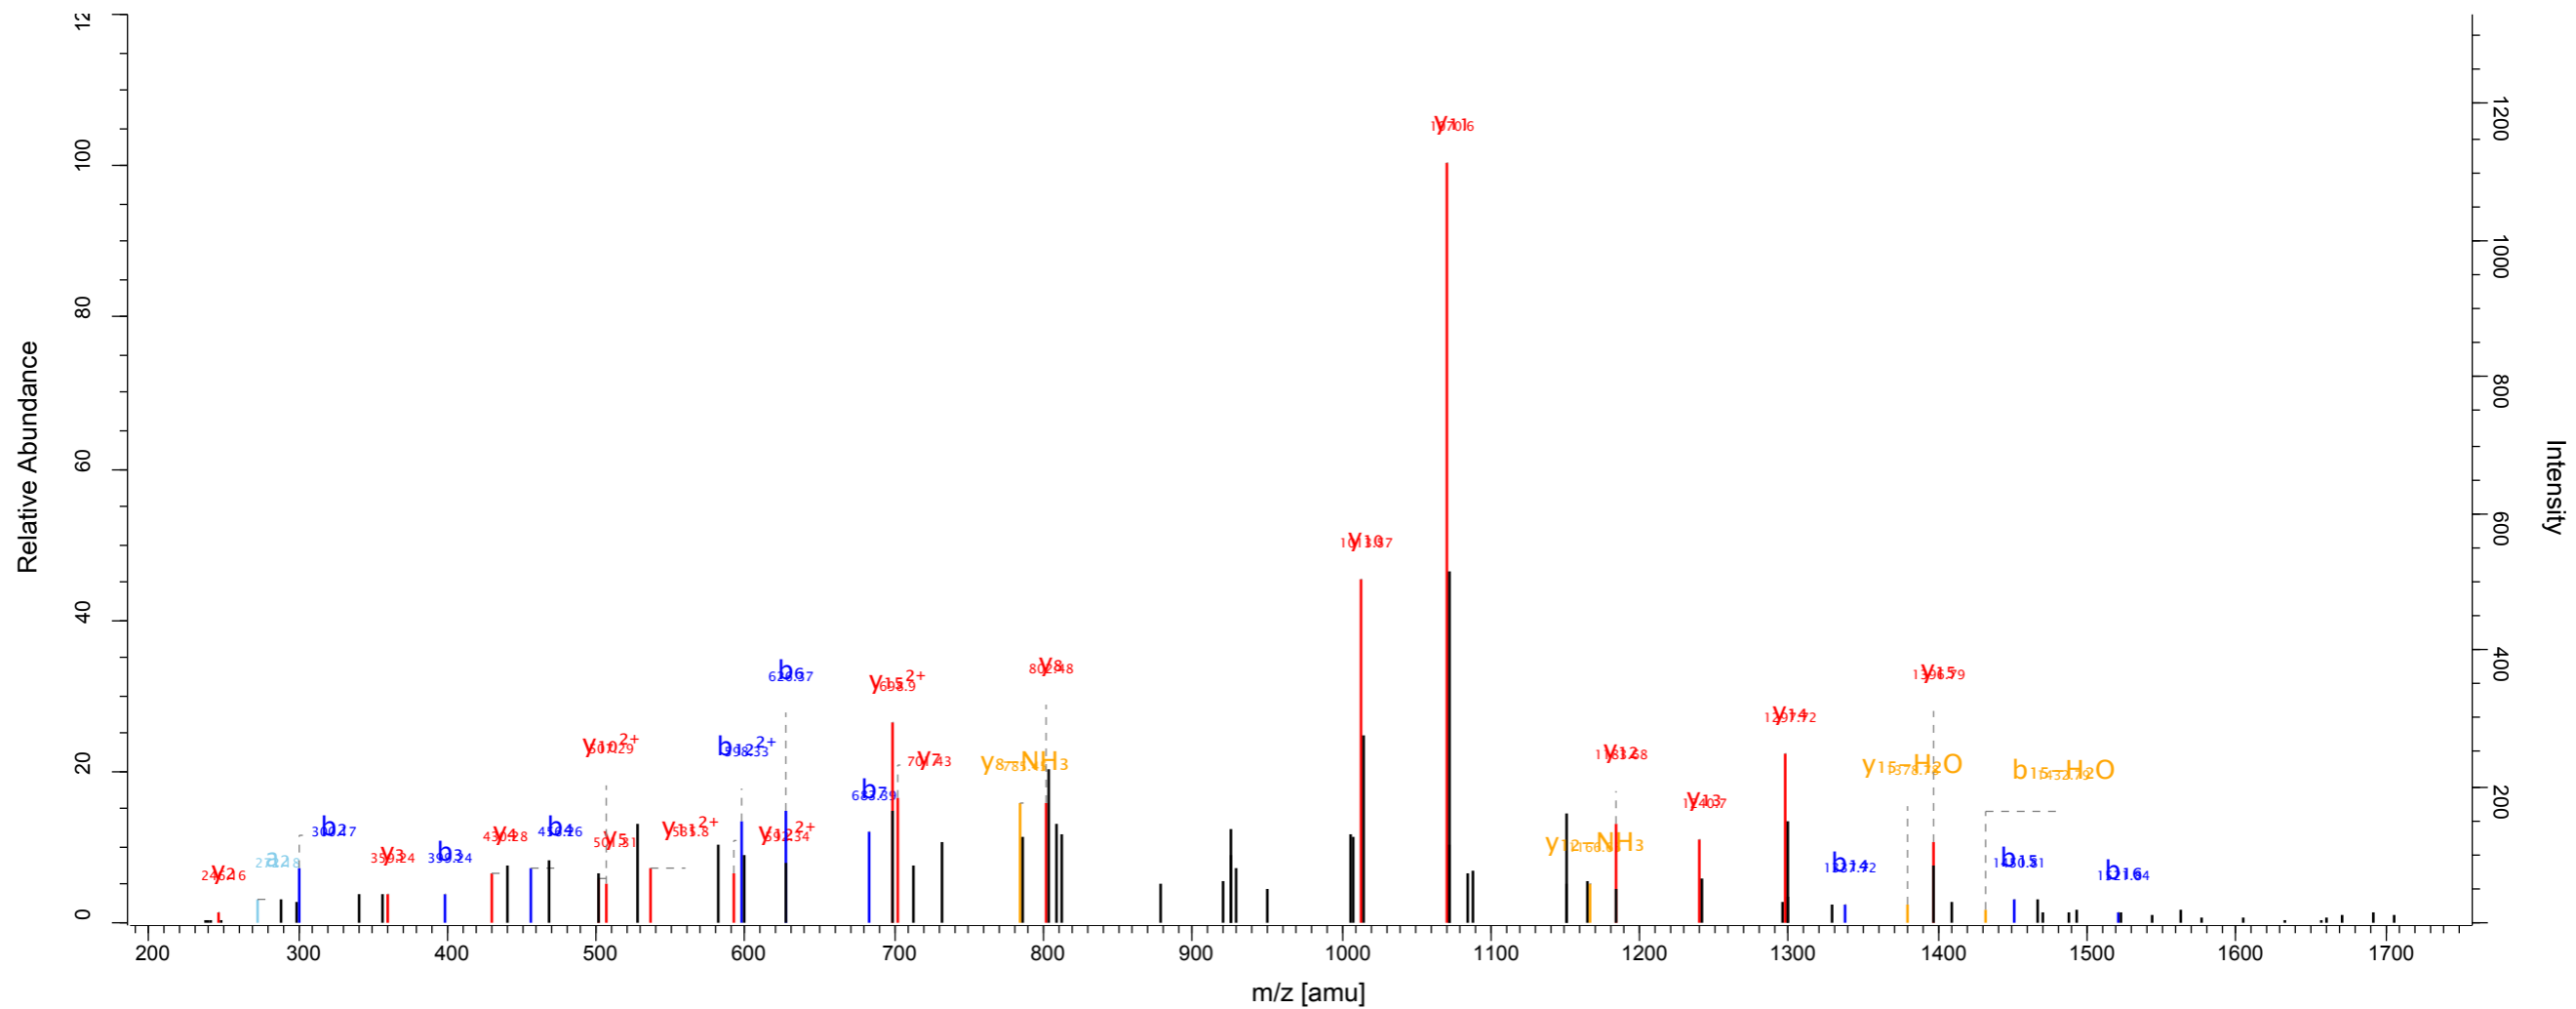

|             |           |          |                                      |
|-------------|-----------|----------|--------------------------------------|
| Scan number | 8149      | Raw file | SKaraca_LMB_Forward_H3_121011_8_rep2 |
| Method      | ITMS; CID | Pepti... | 153.22                               |

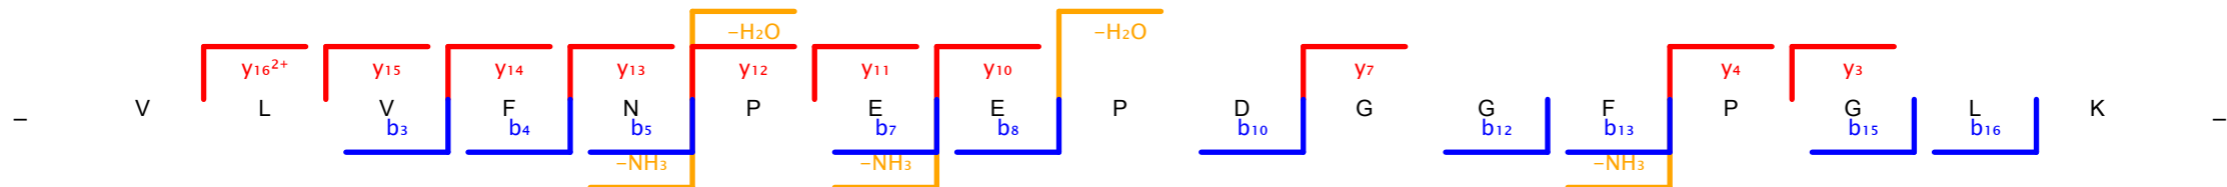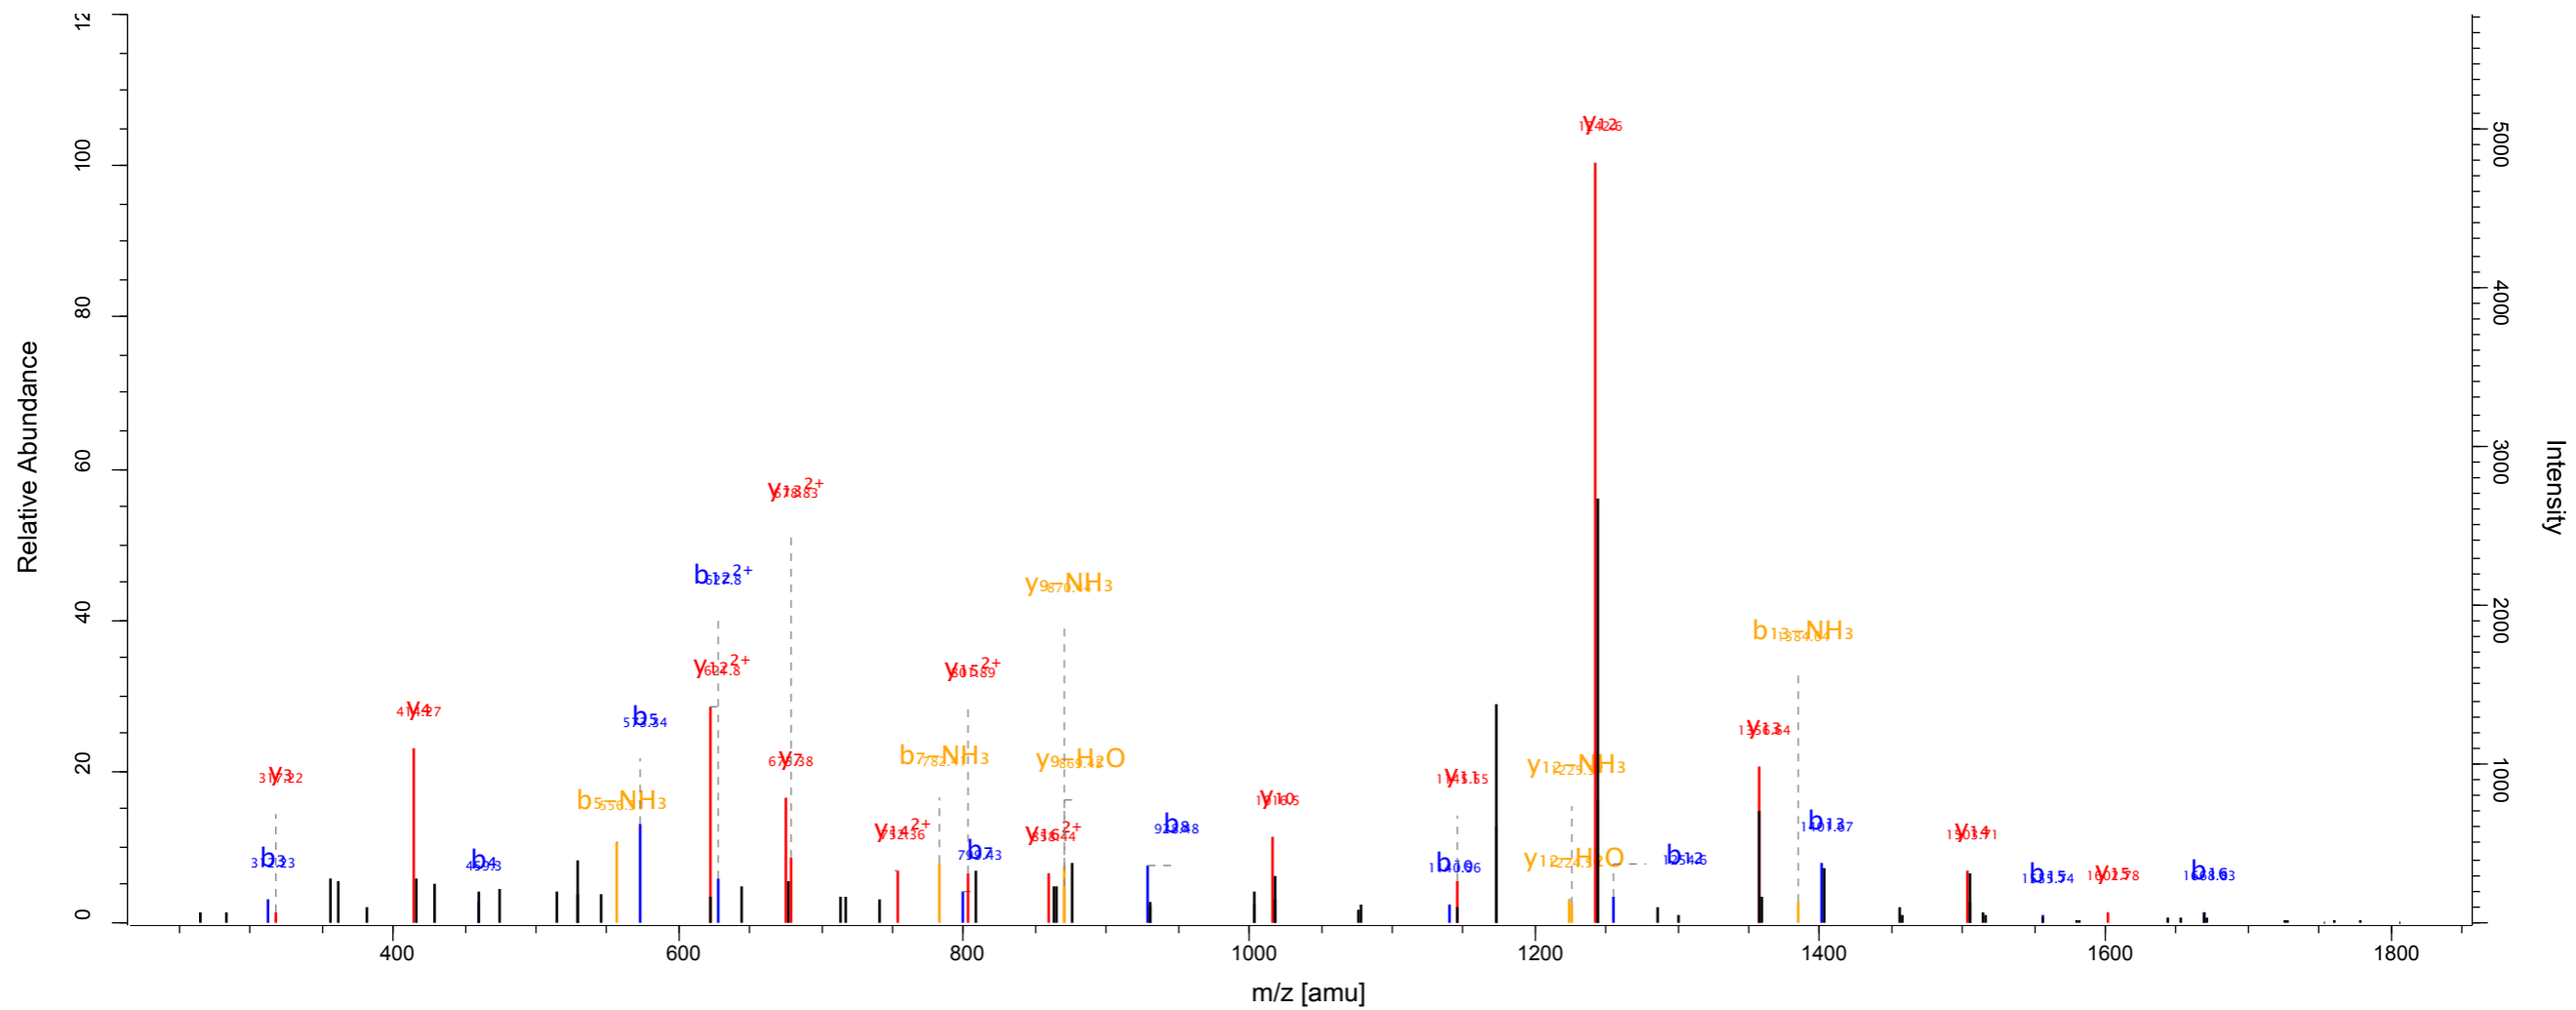



Scan number 8402 Raw file SKaraca\_LMB\_Forward\_H3\_121011\_8\_rep2  
 Method ITMS; CID Pepti... 146.59

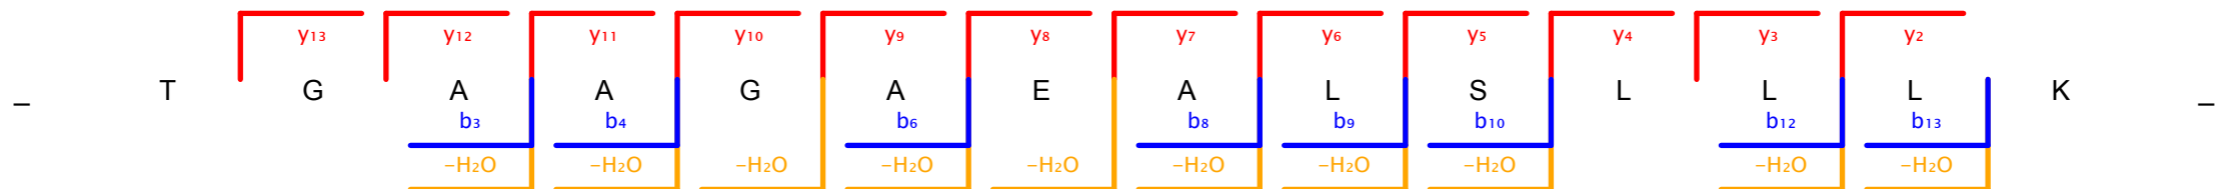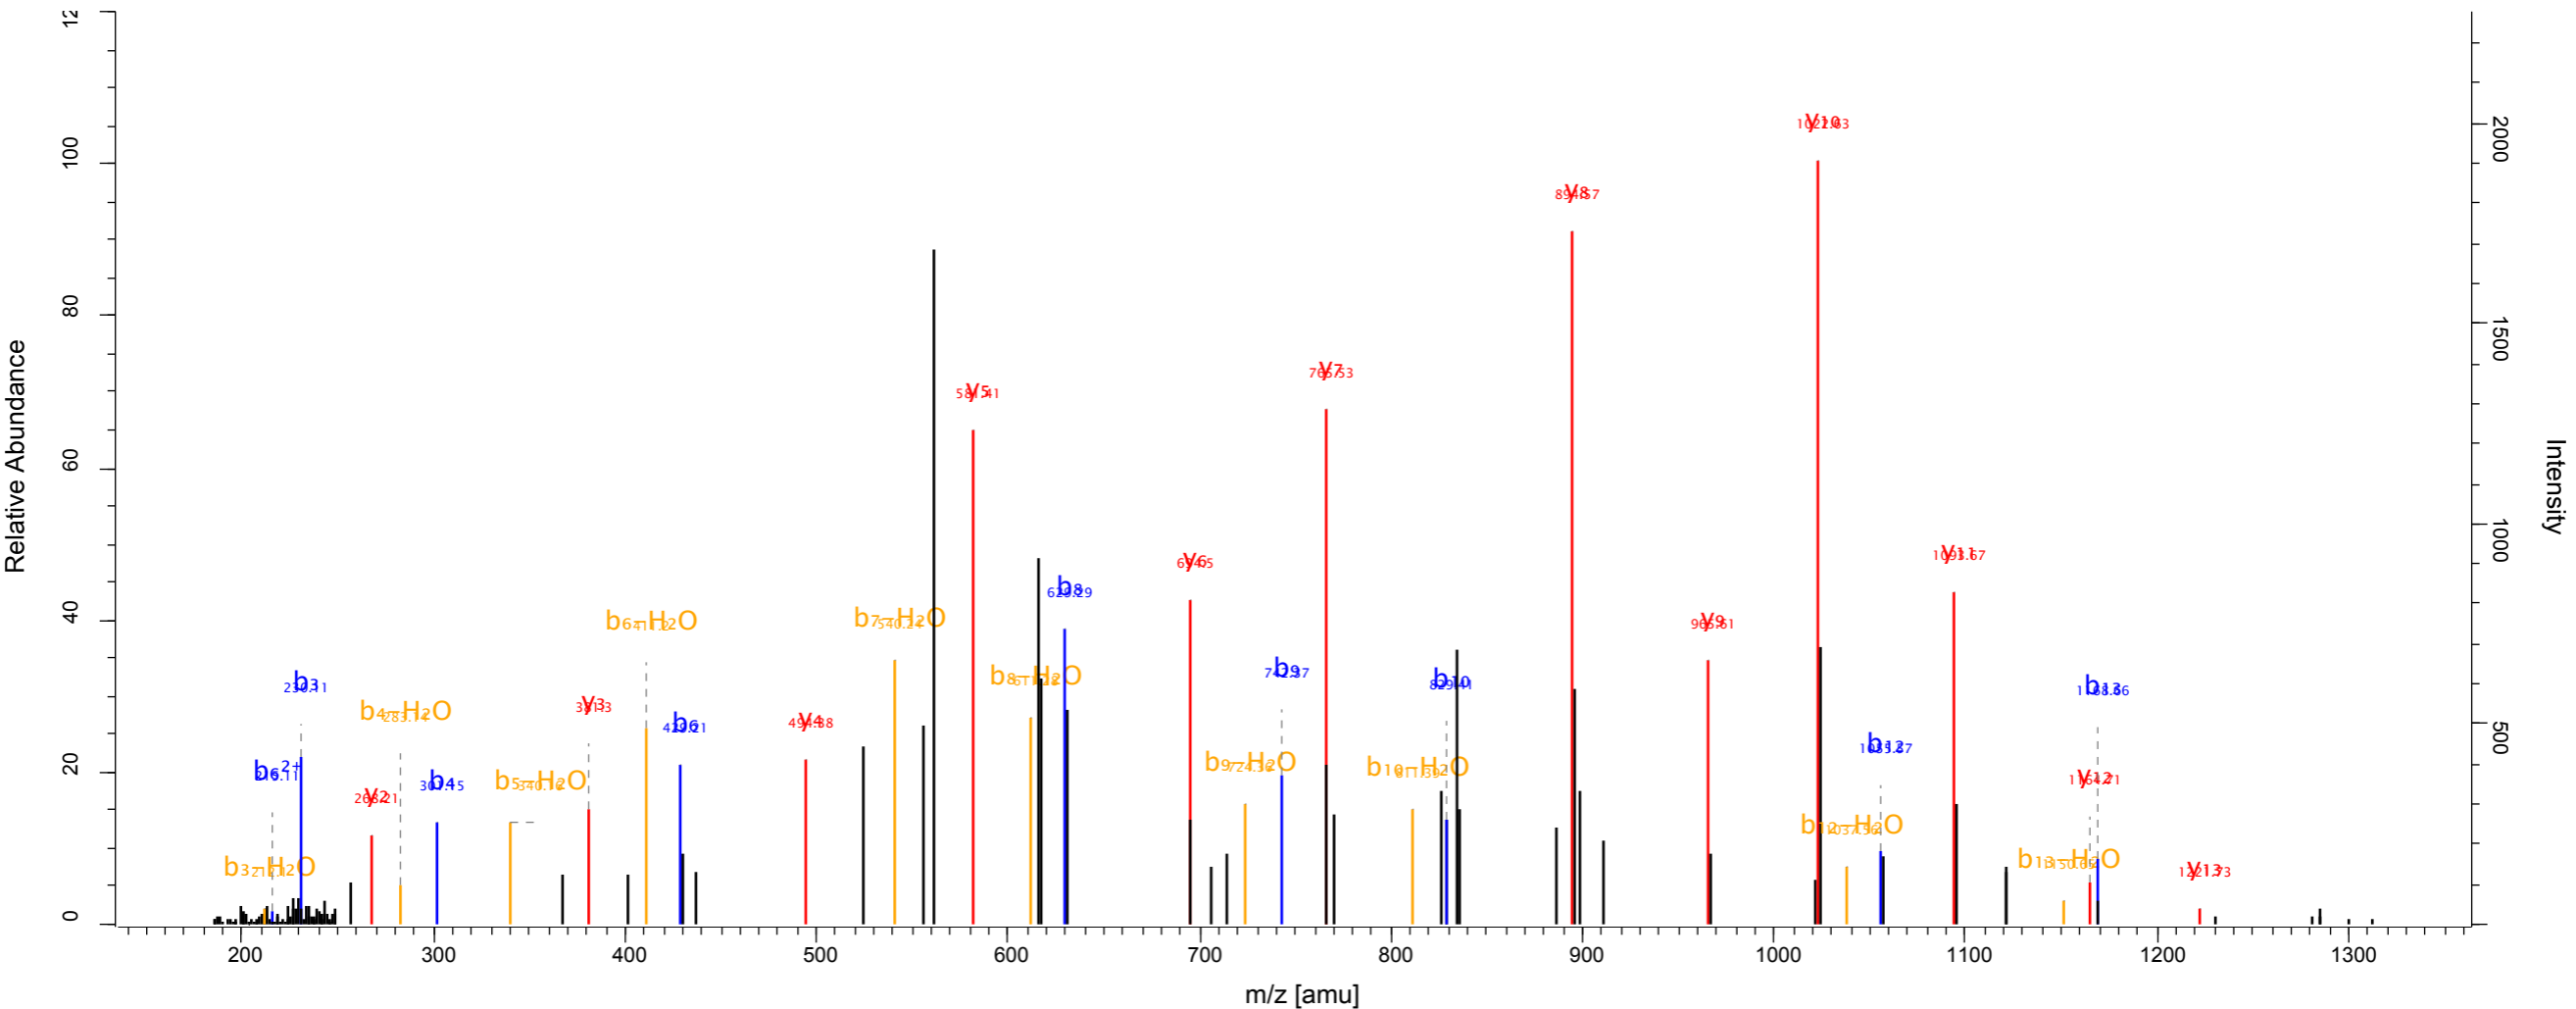

Scan number 8642 Raw file SKaraca\_LMB\_Forward\_H3\_121011\_8\_rep2  
 Method ITMS; CID Pepti... 127.17

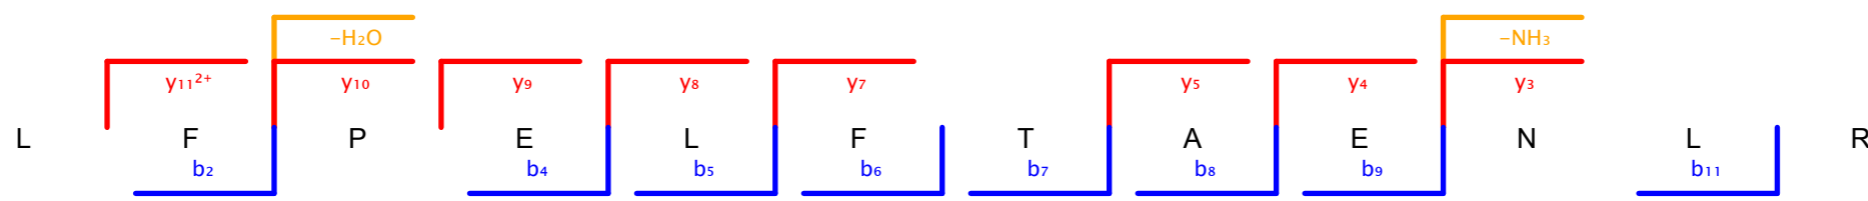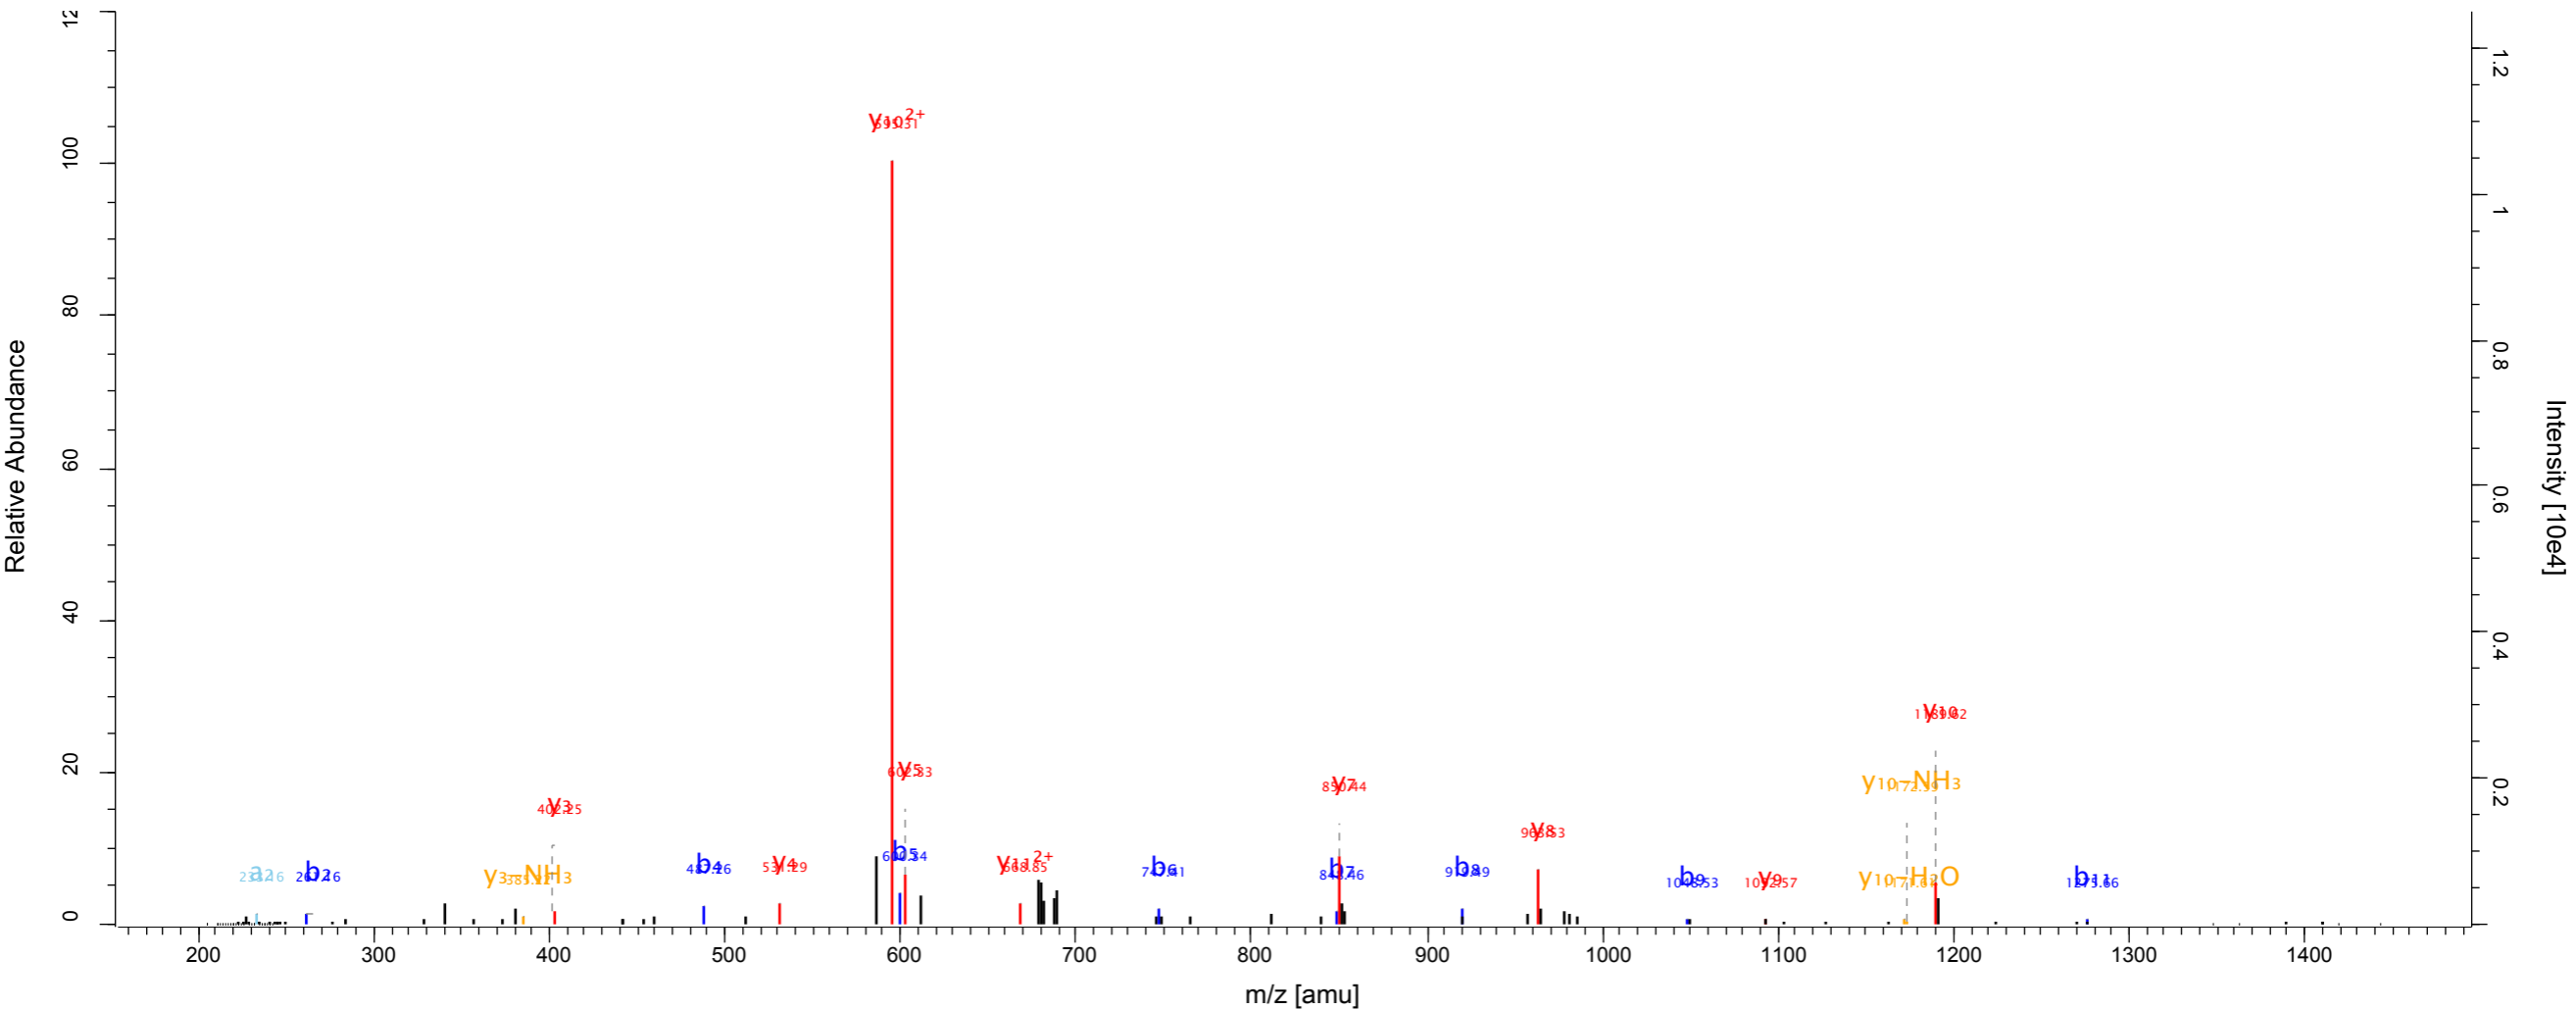

Scan number 1728  
Method ITMS; CID

Raw file SKaraca\_LMB\_Forward\_H3\_121011\_9\_rep2  
Pepti... 177.81

G

A

K

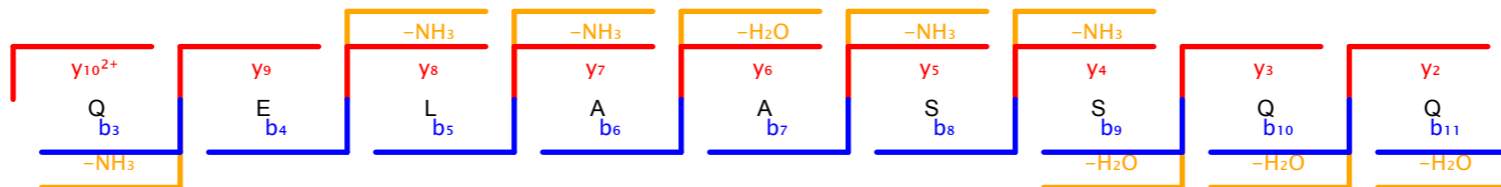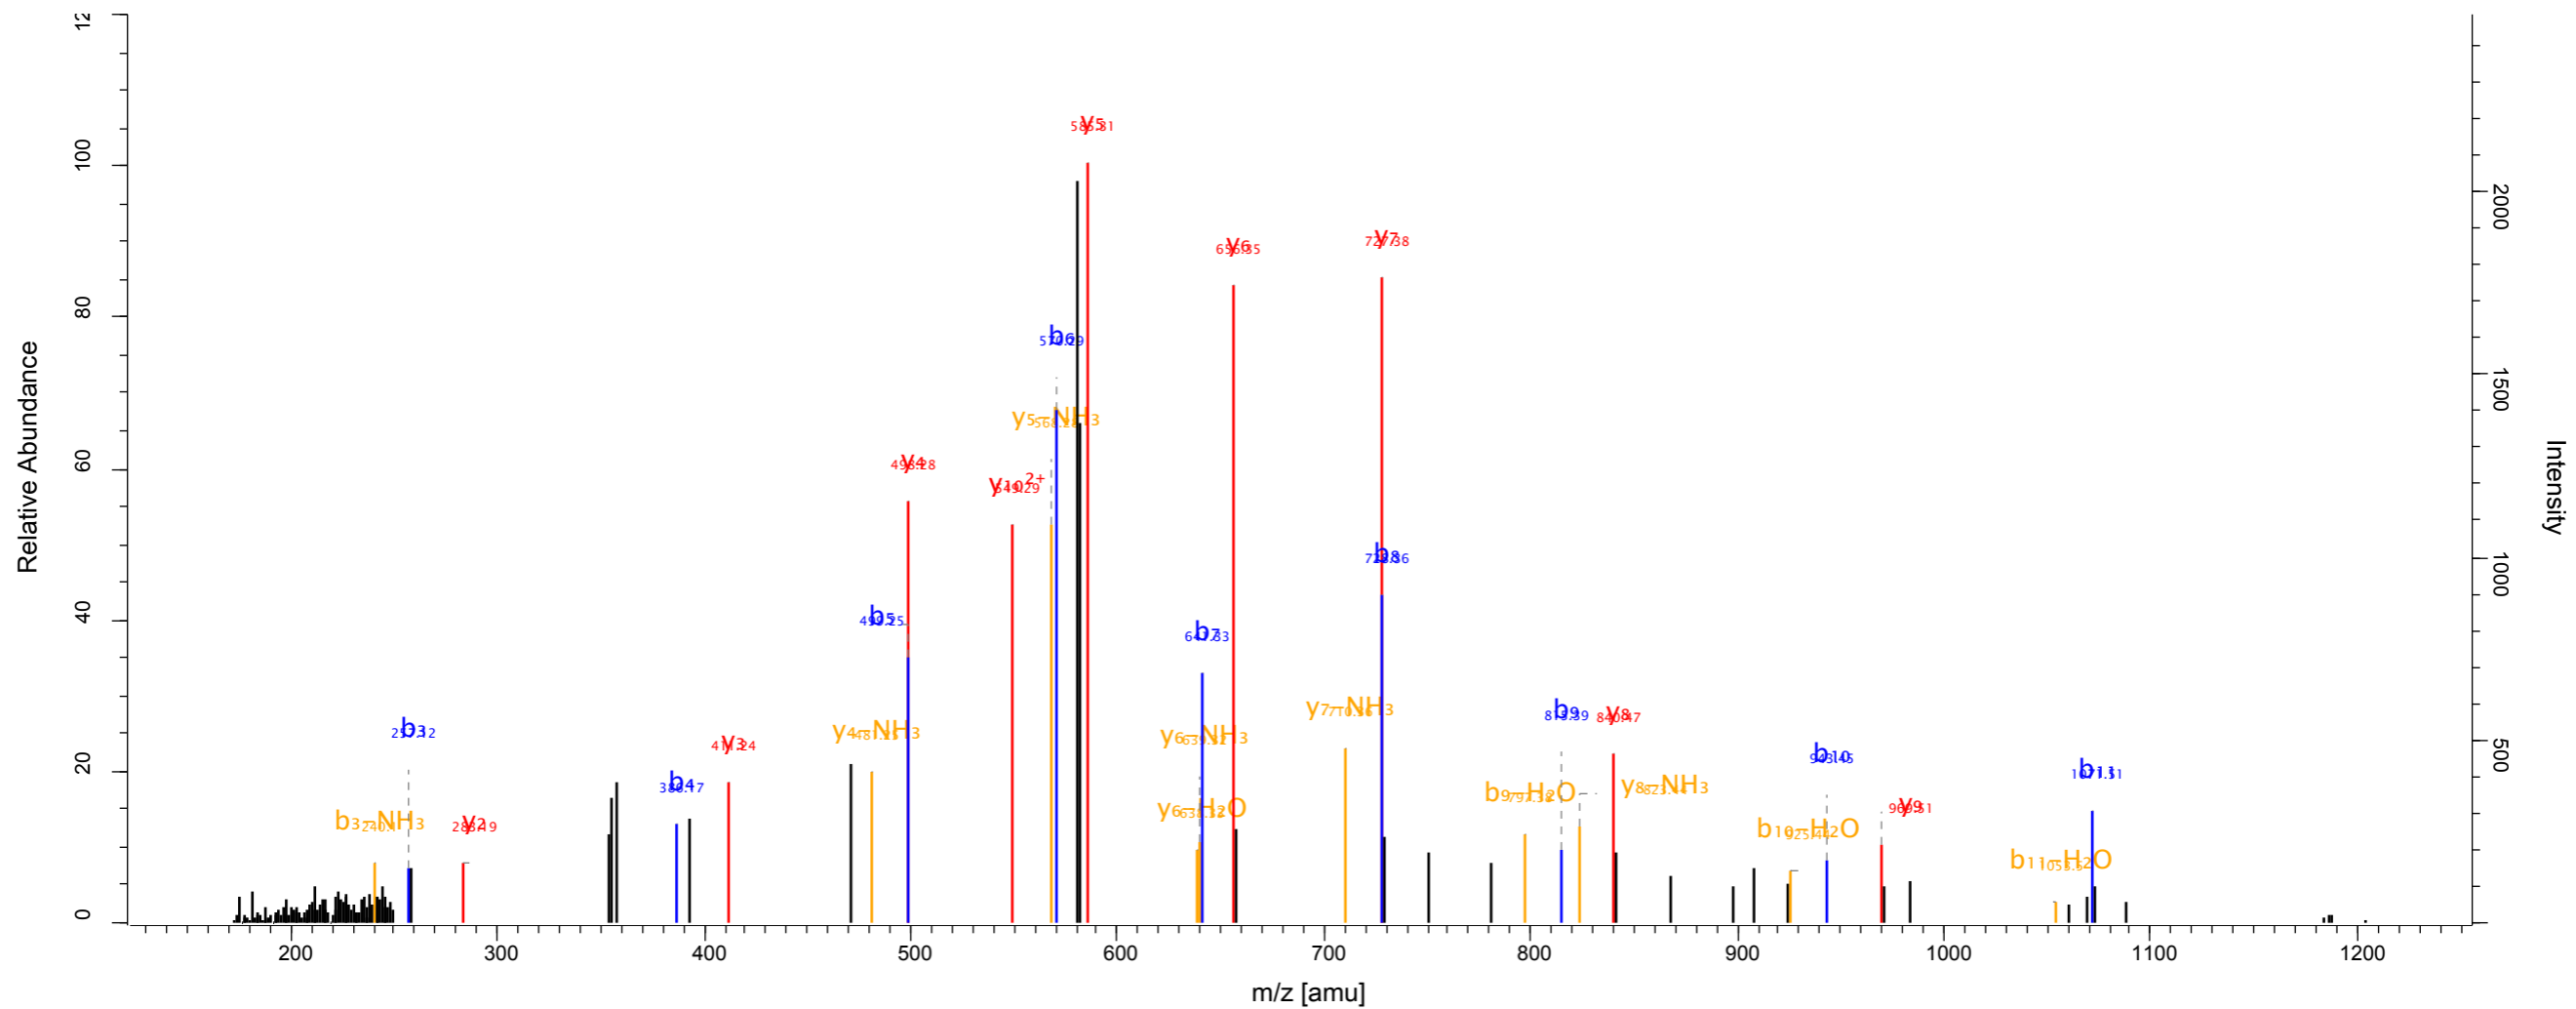

Scan number 8314 Raw file SKaraca\_LMB\_H1\_Forward\_041011\_10\_rep1  
 Method ITMS; CID Pepti... 79.35

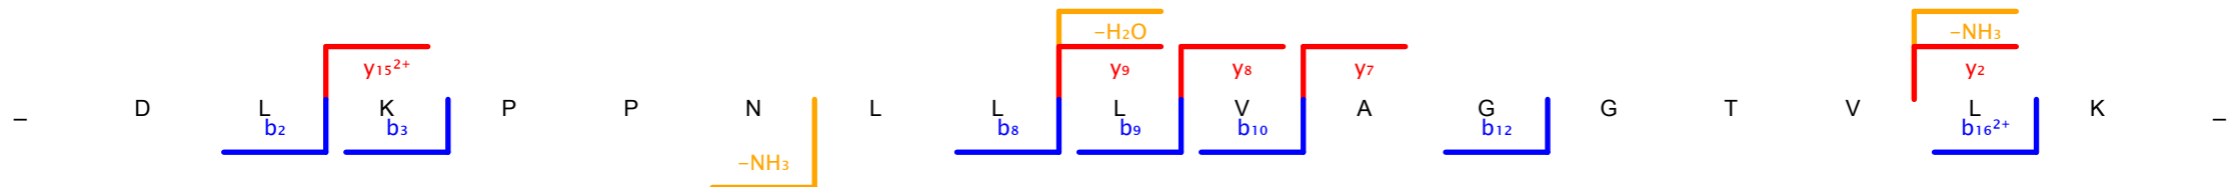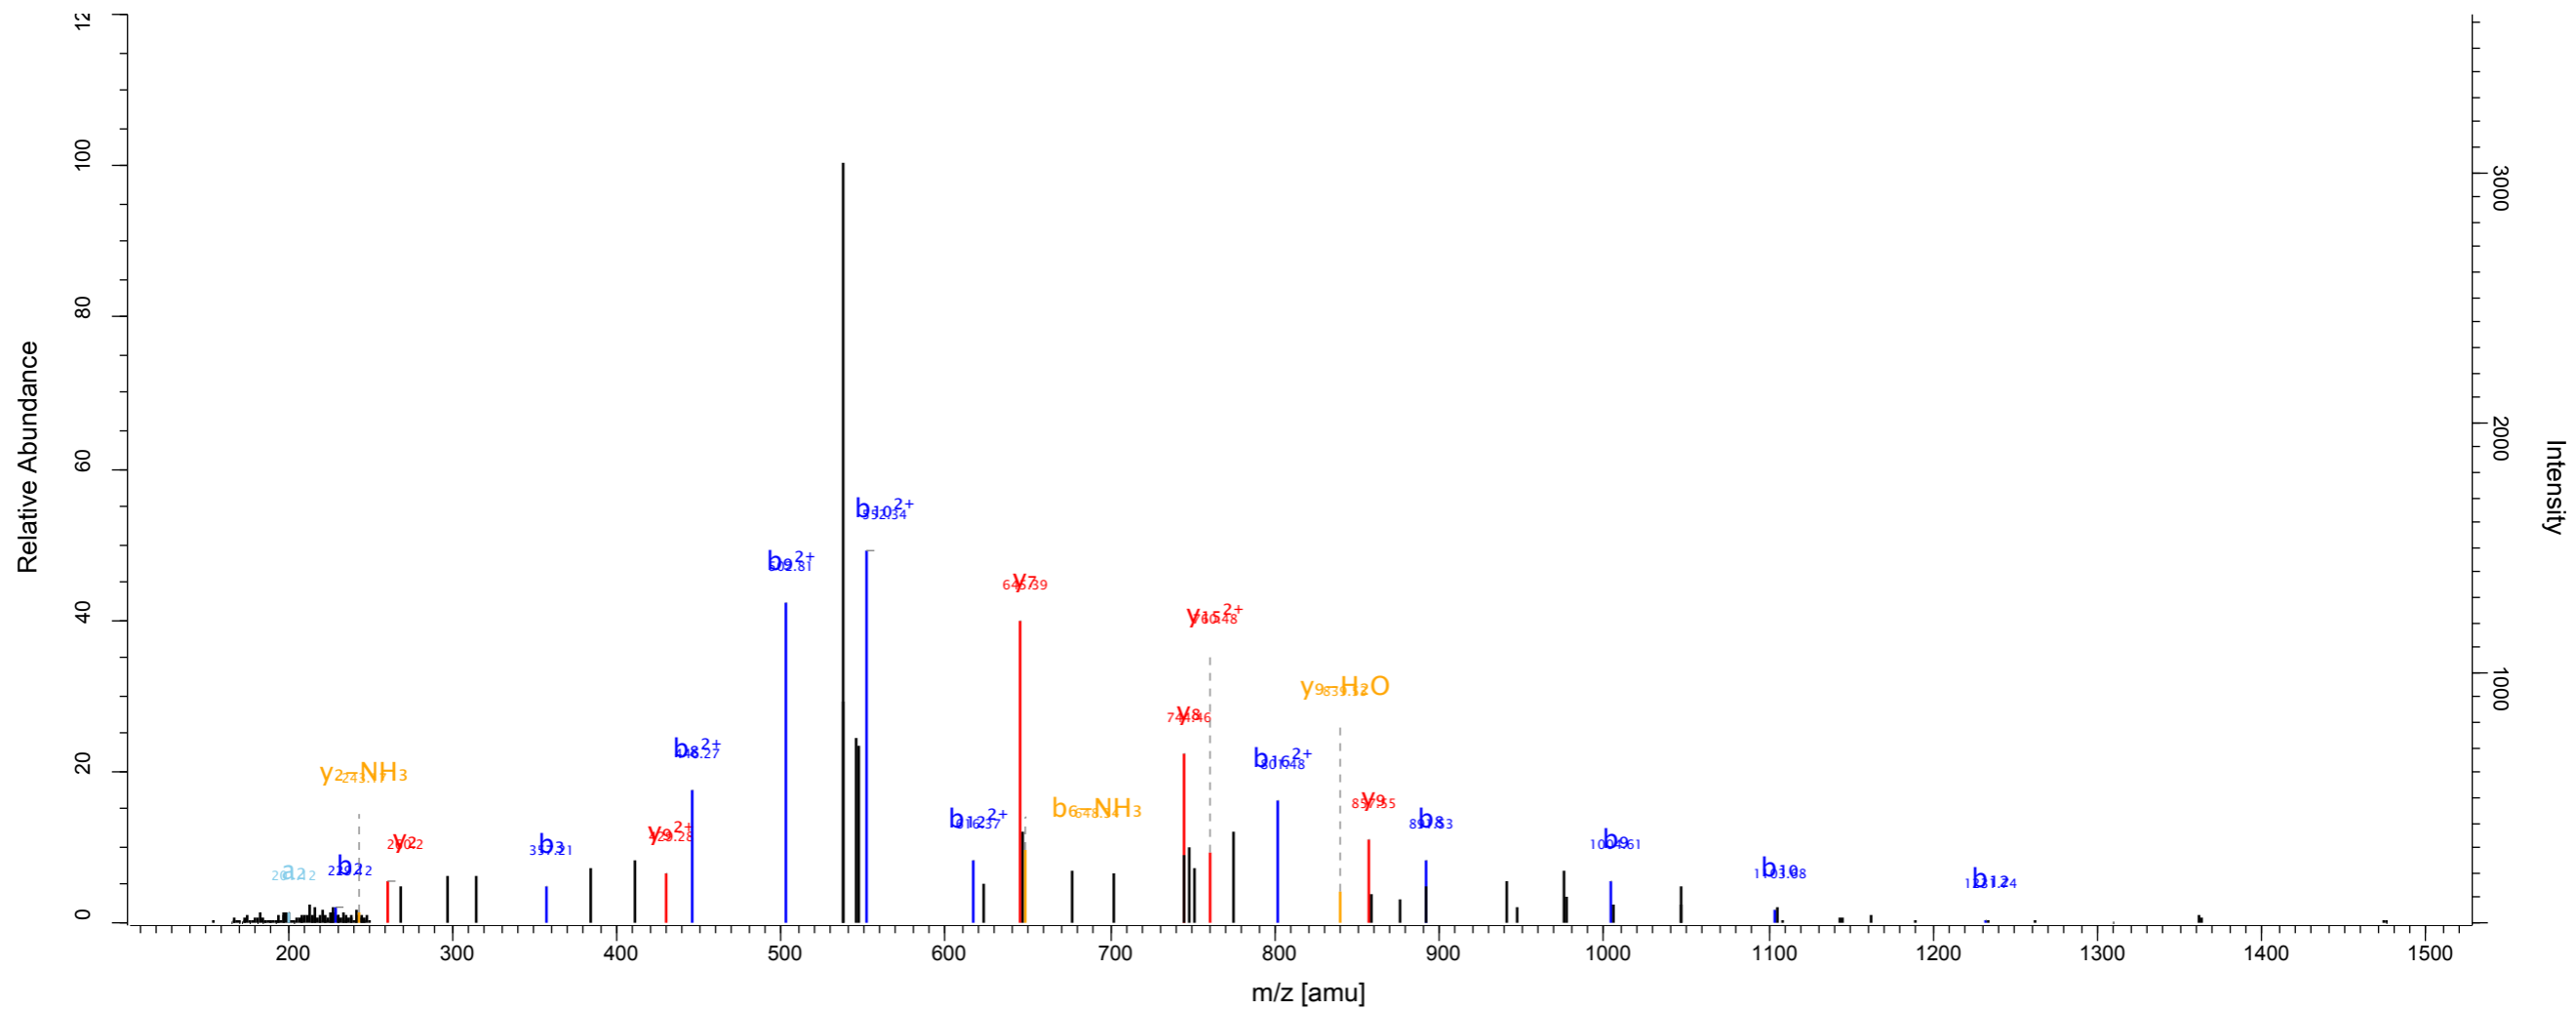

Scan number 9382 Raw file SKaraca\_LMB\_H1\_Forward\_041011\_10\_rep1  
 Method ITMS; CID Pepti... 107.34

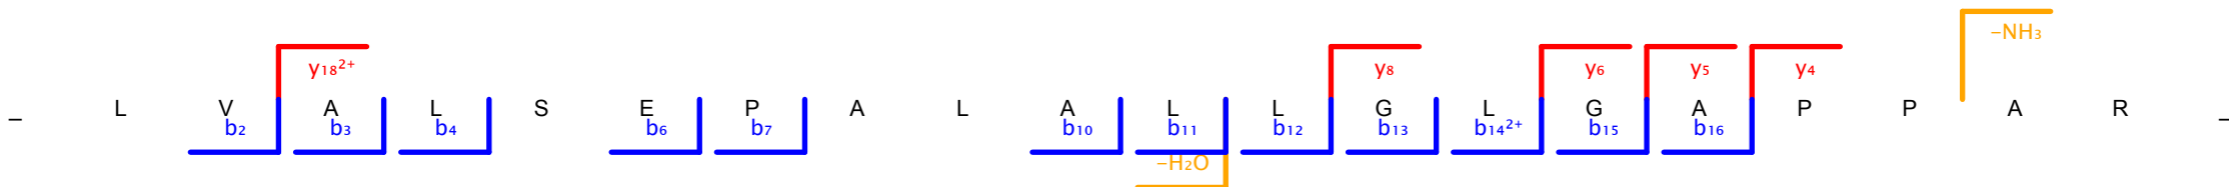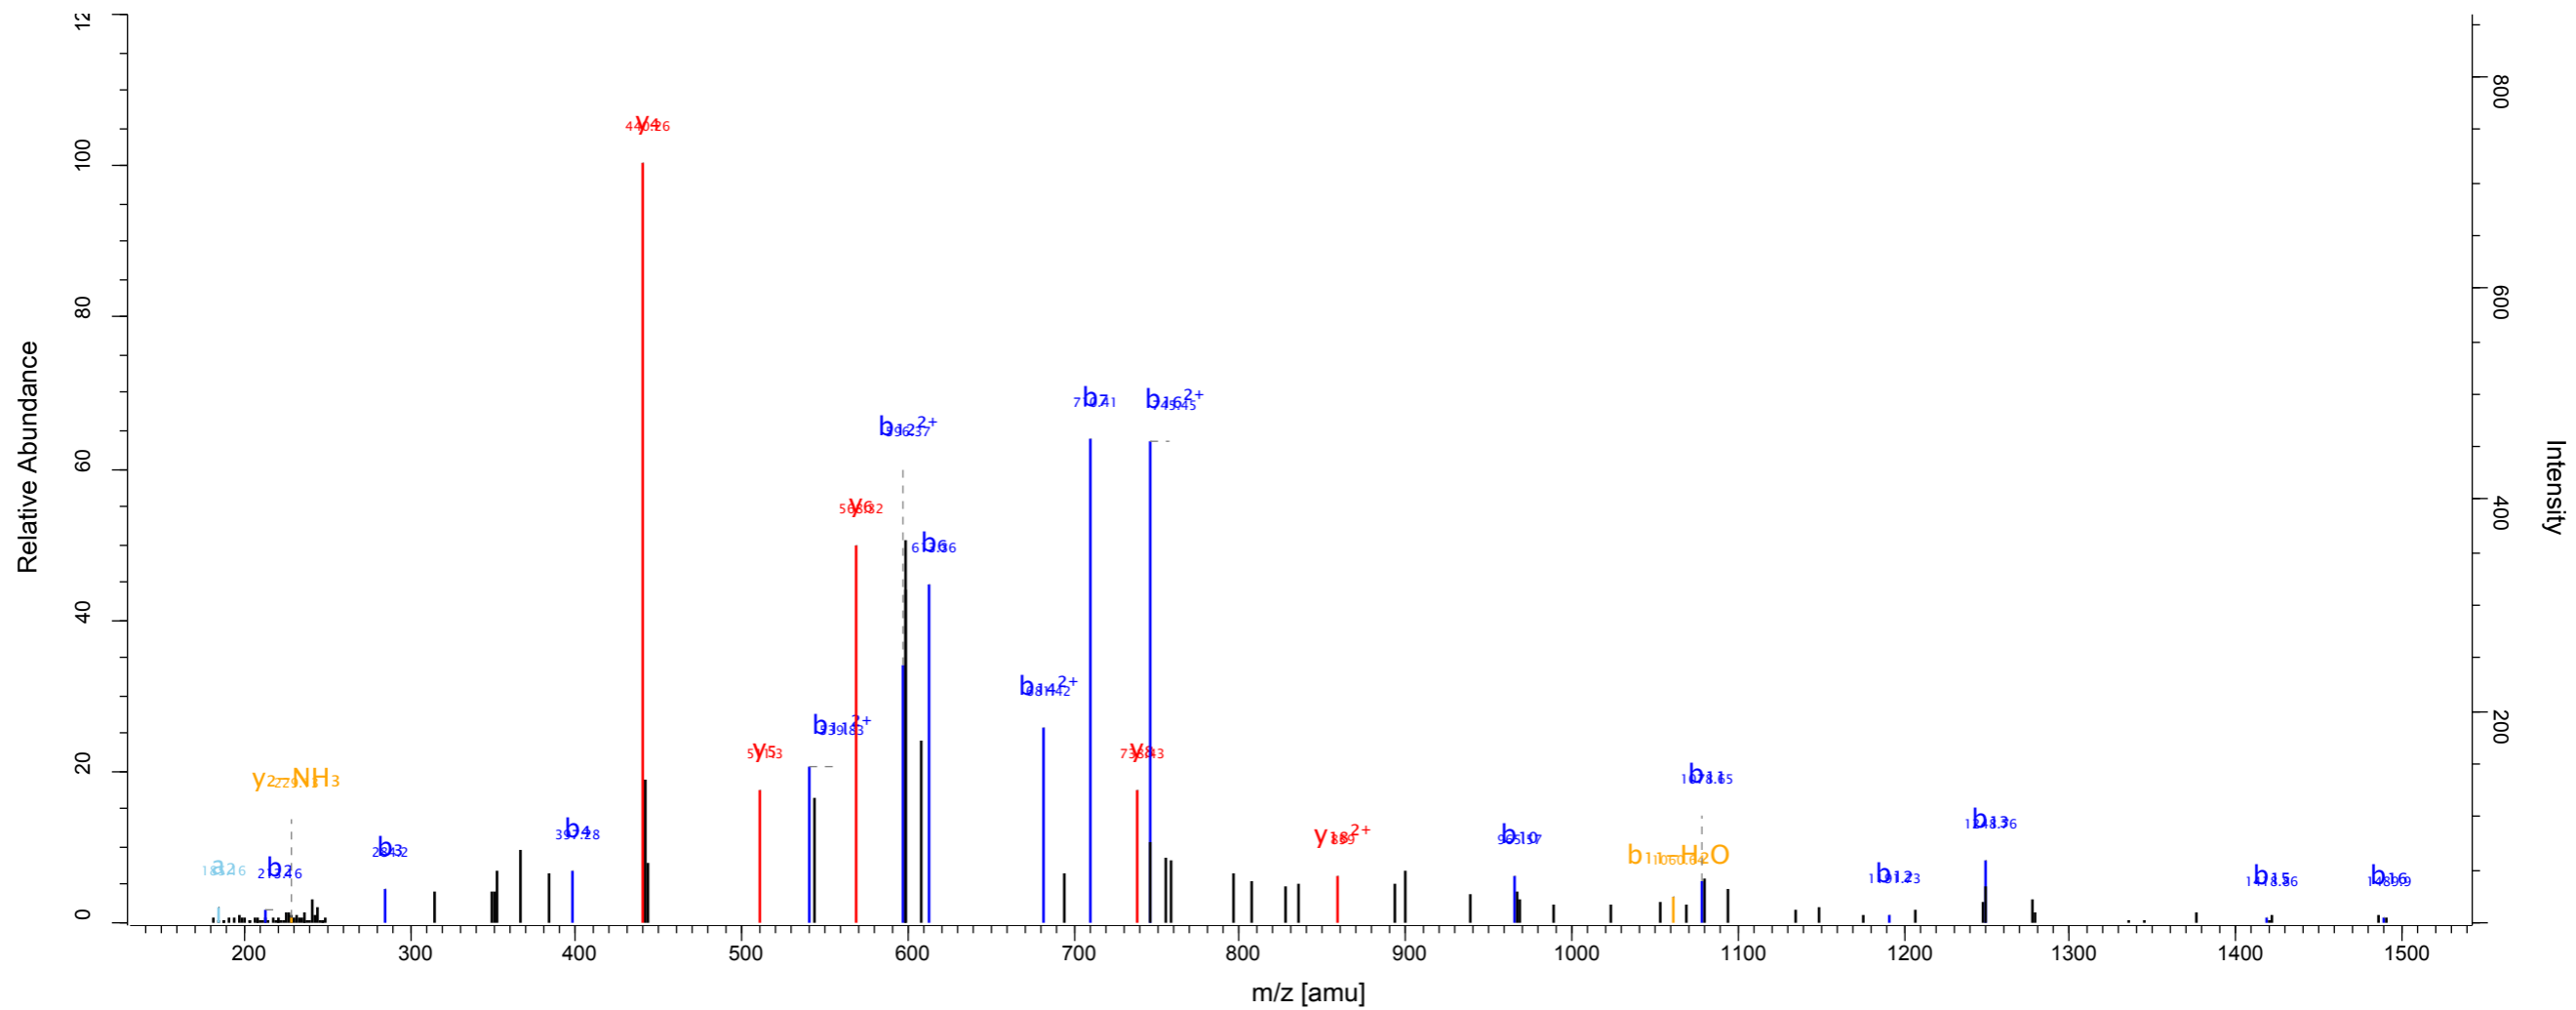

Scan number 7641 Raw file SKaraca\_LMB\_H1\_Forward\_041011\_12\_rep1  
 Method ITMS; CID Pepti... 110.38

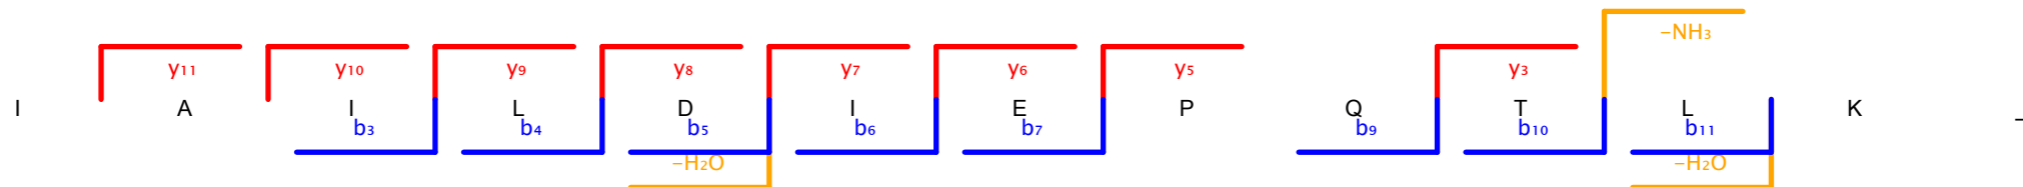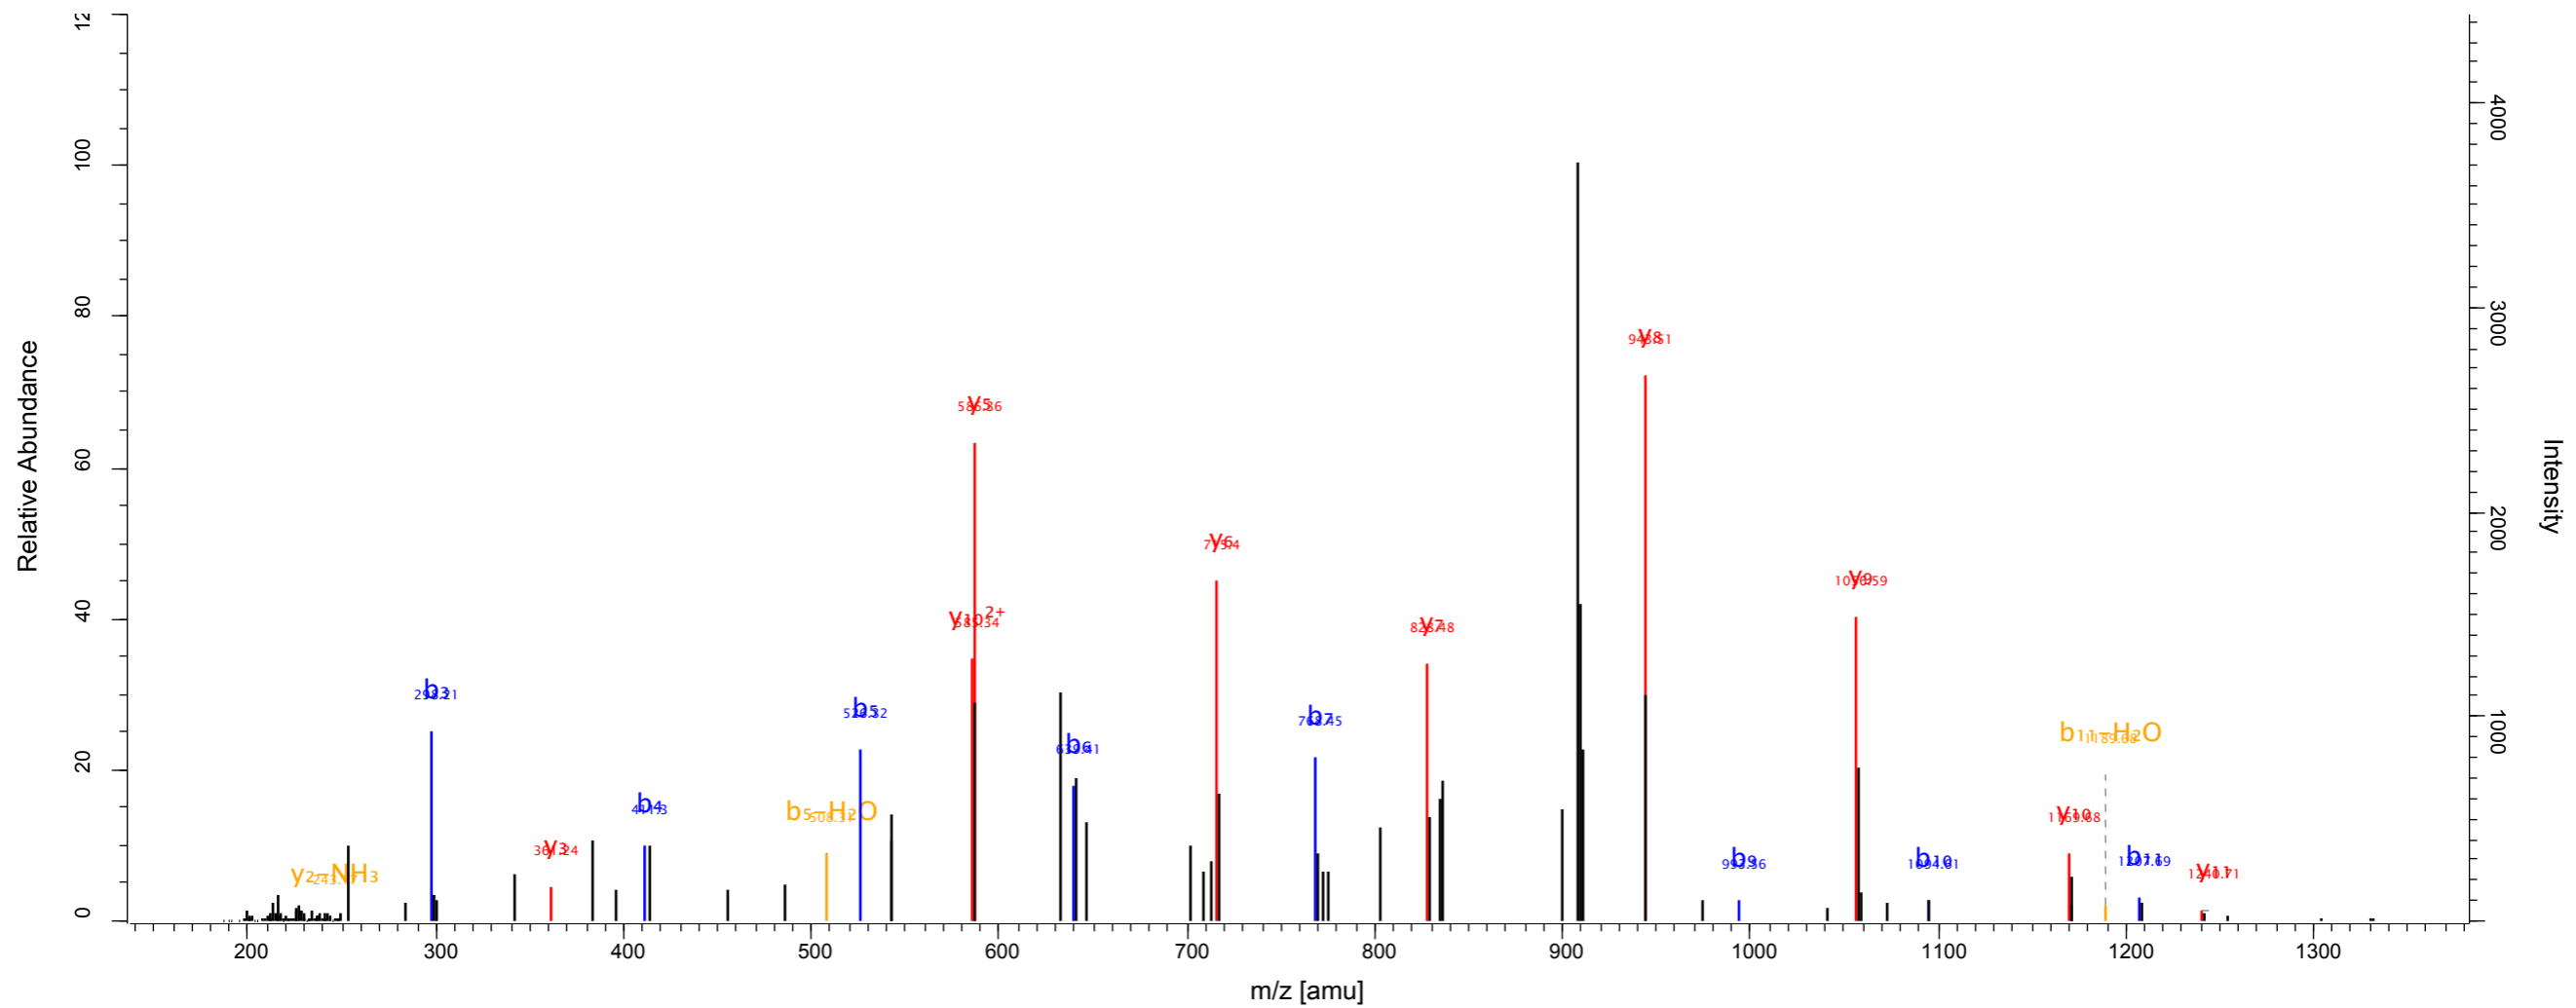

Scan number 9143 Raw file SKaraca\_LMB\_H1\_Forward\_041011\_12\_rep1  
 Method ITMS; CID Pepti... 203.87

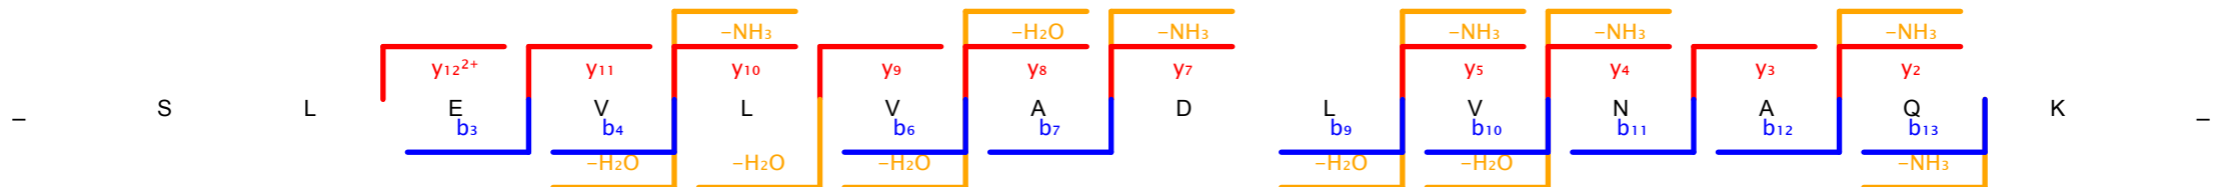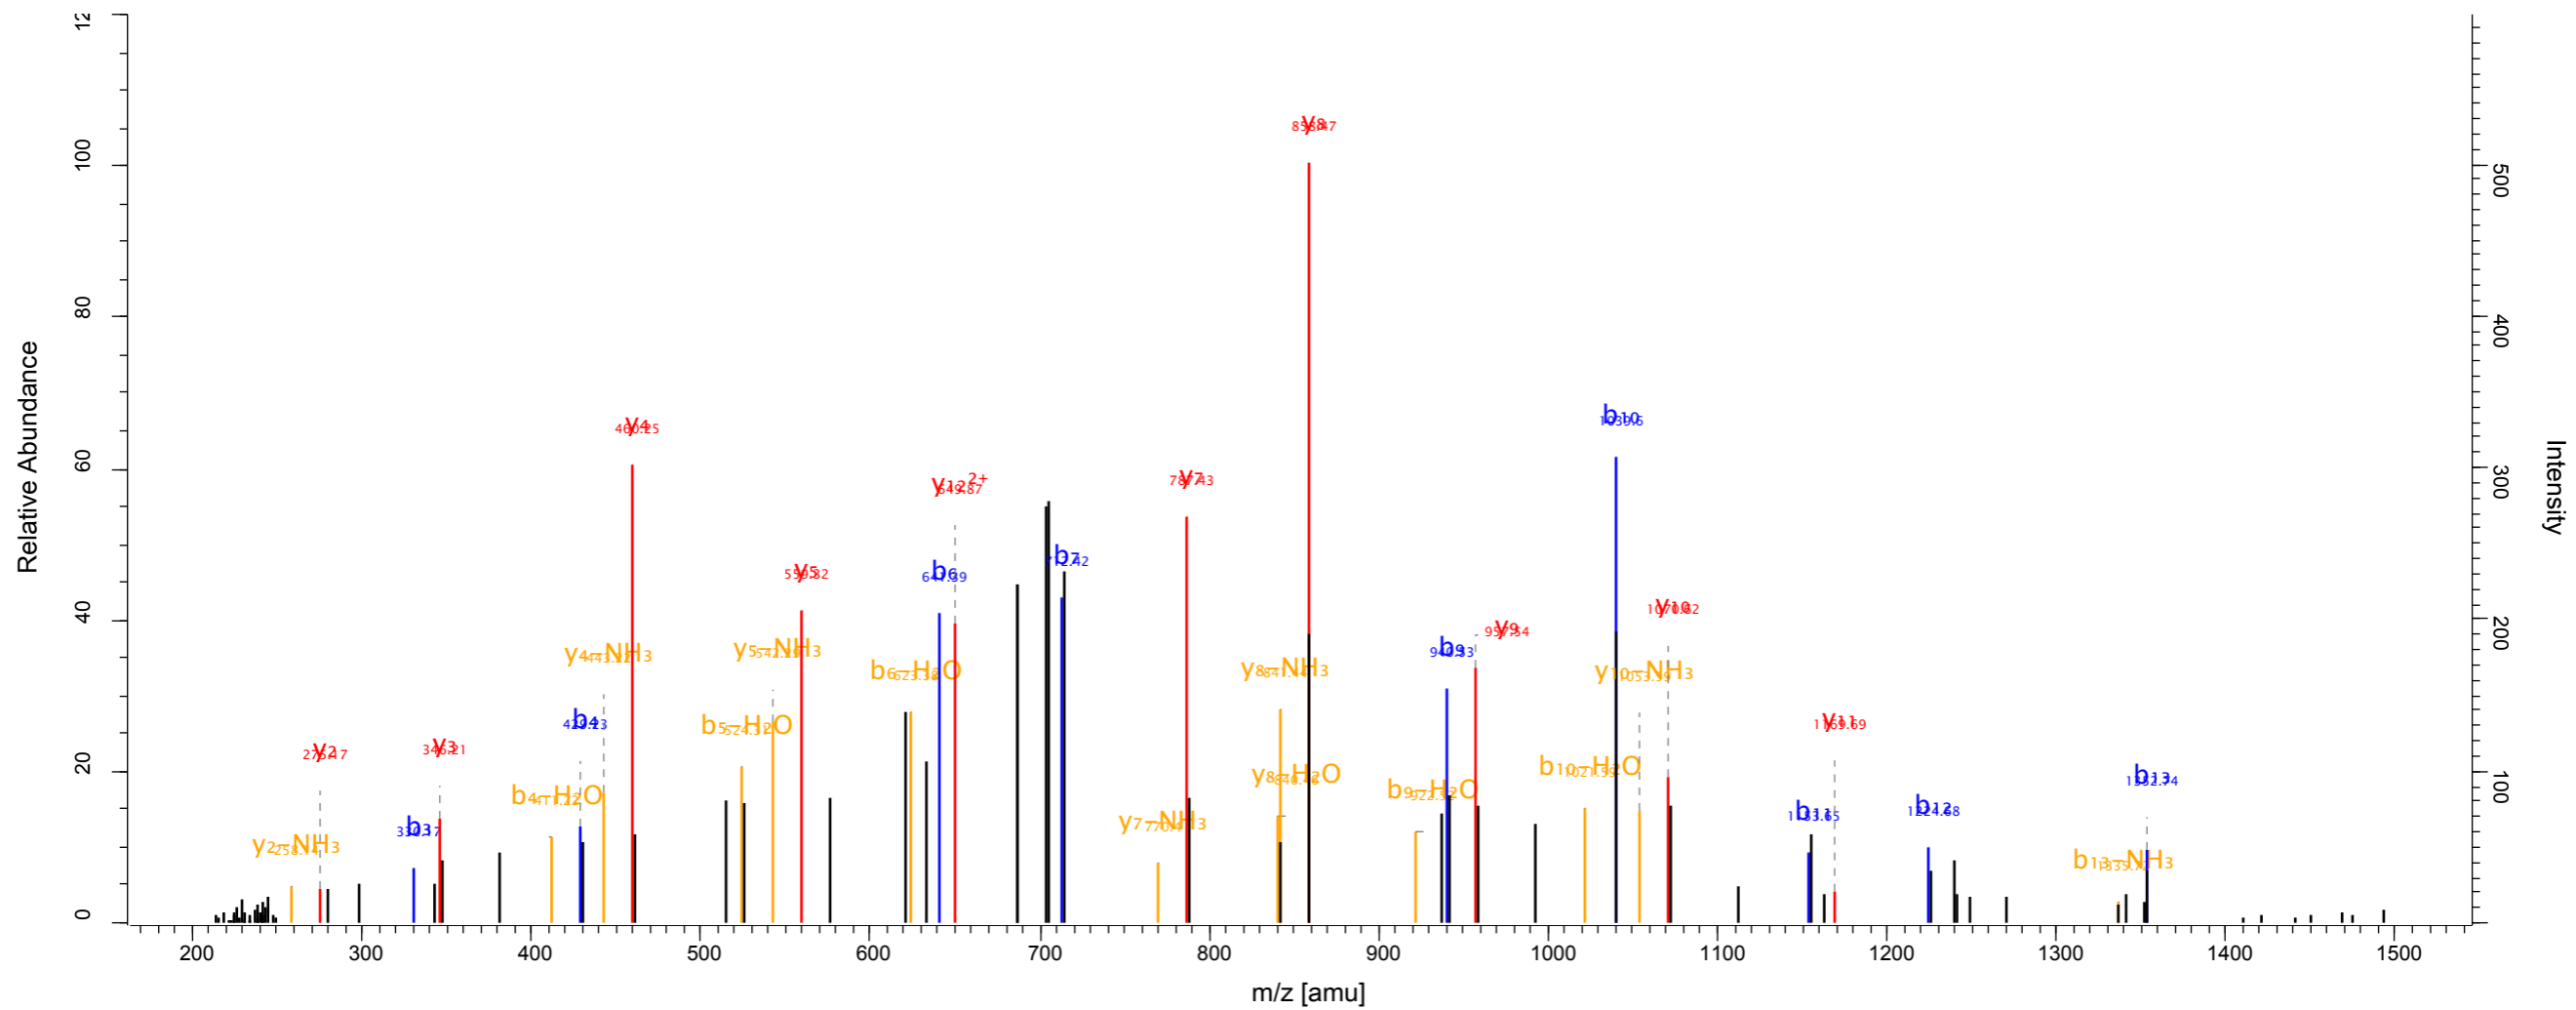

Scan number 2893 Raw file SKaraca\_LMB\_H1\_Forward\_041011\_12\_rep2  
 Method ITMS; CID Pepti... 136.83

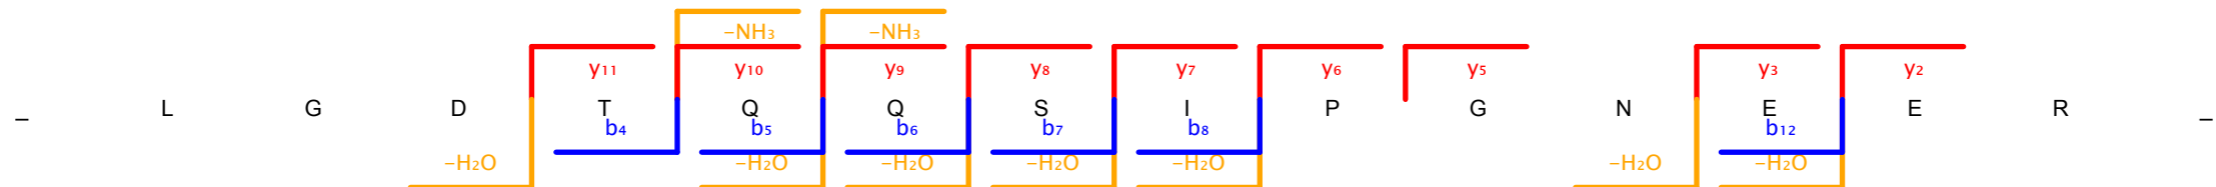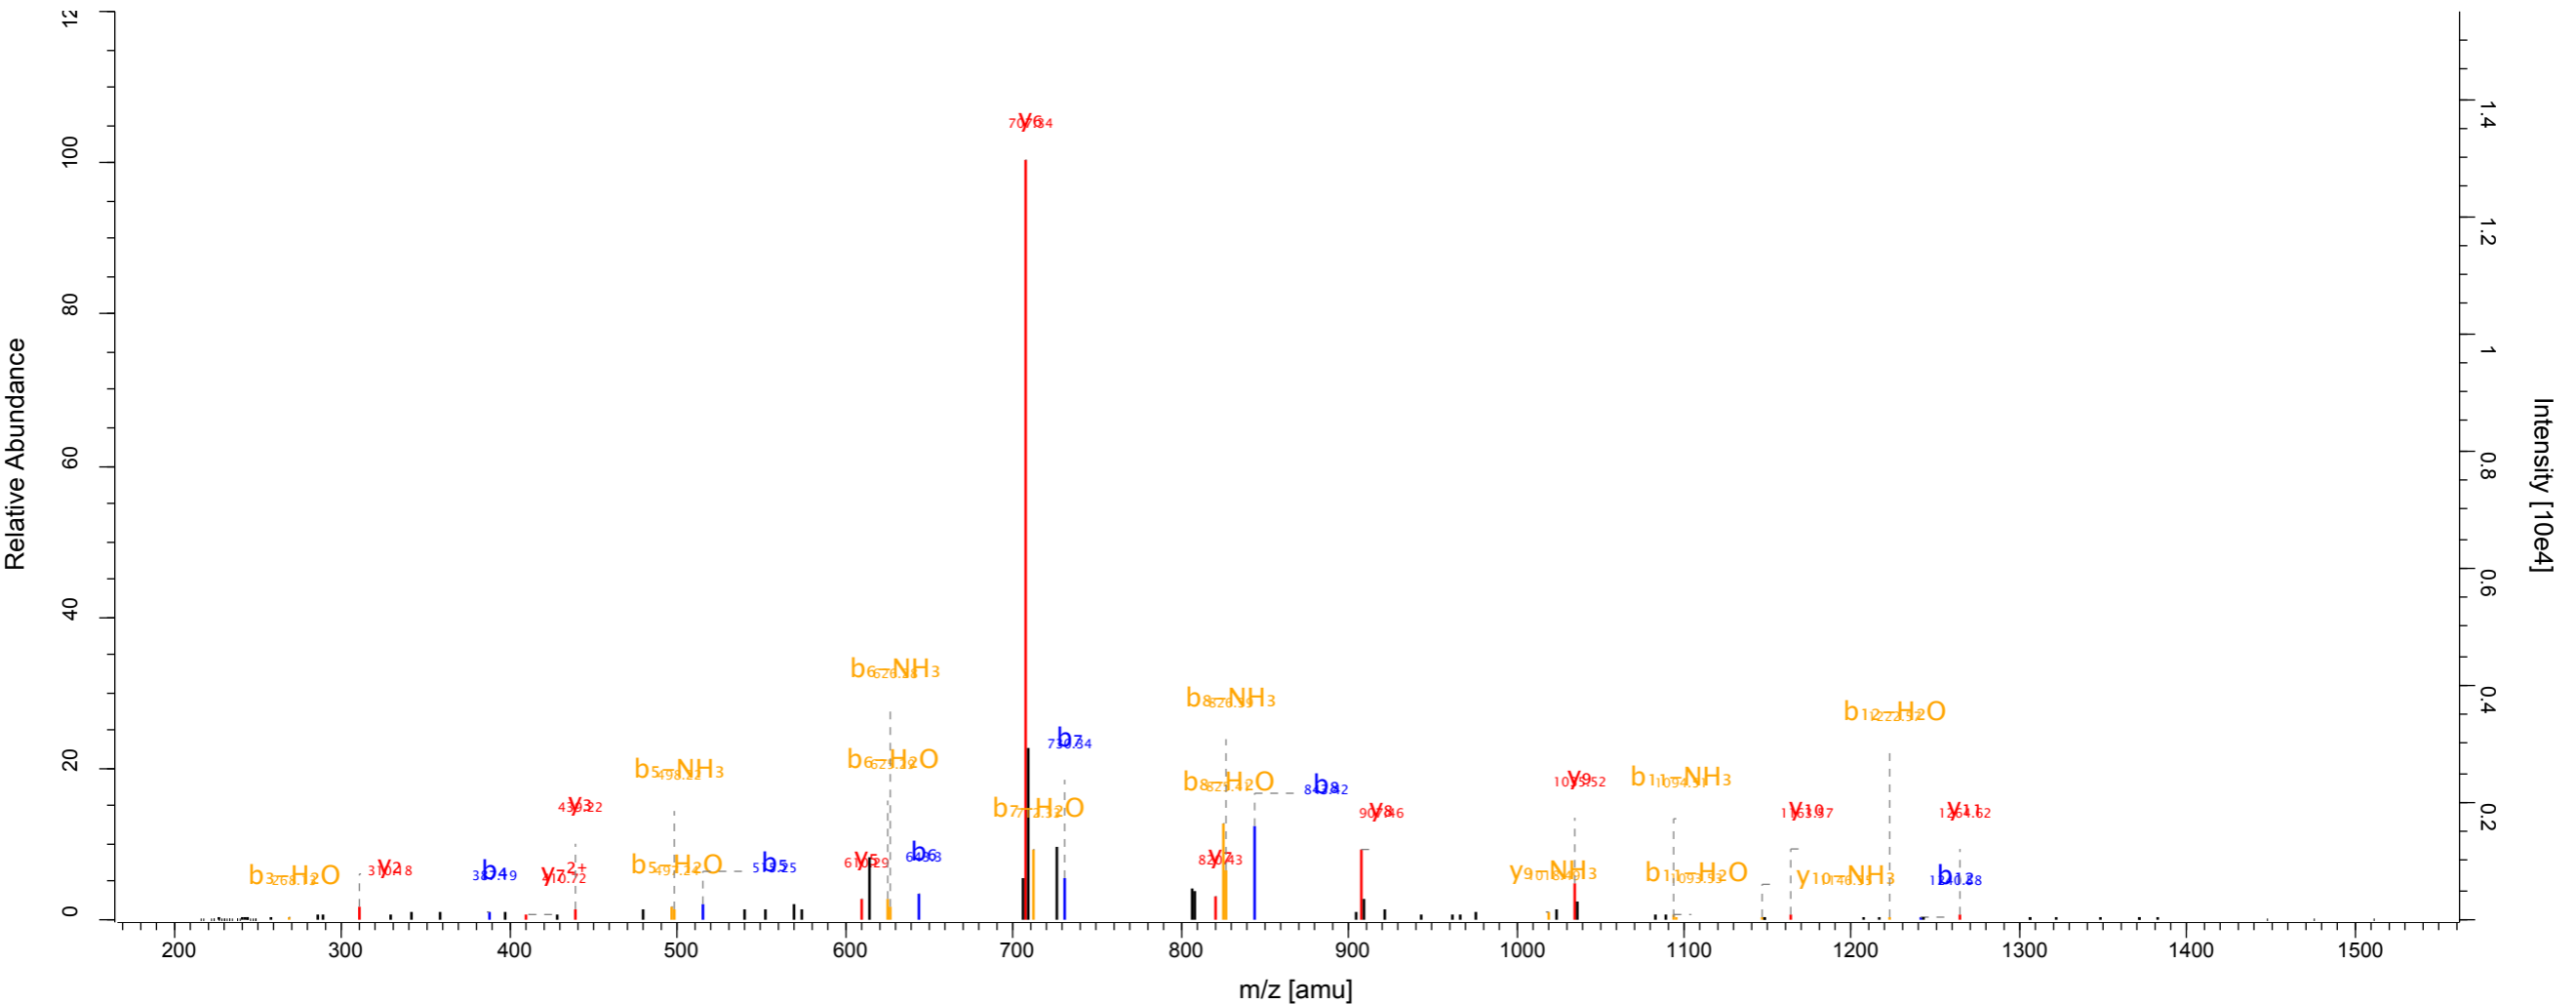



|             |           |          |                                       |
|-------------|-----------|----------|---------------------------------------|
| Scan number | 5810      | Raw file | SKaraca_LMB_H1_Forward_041011_12_rep2 |
| Method      | ITMS; CID | Pepti... | 110.66                                |

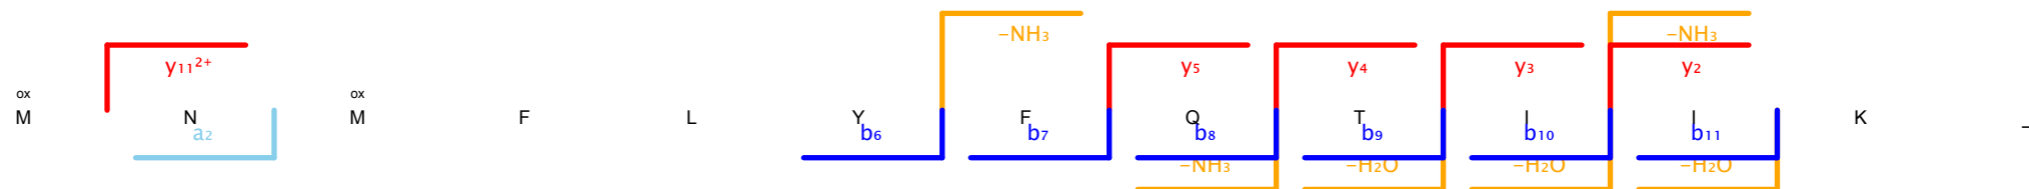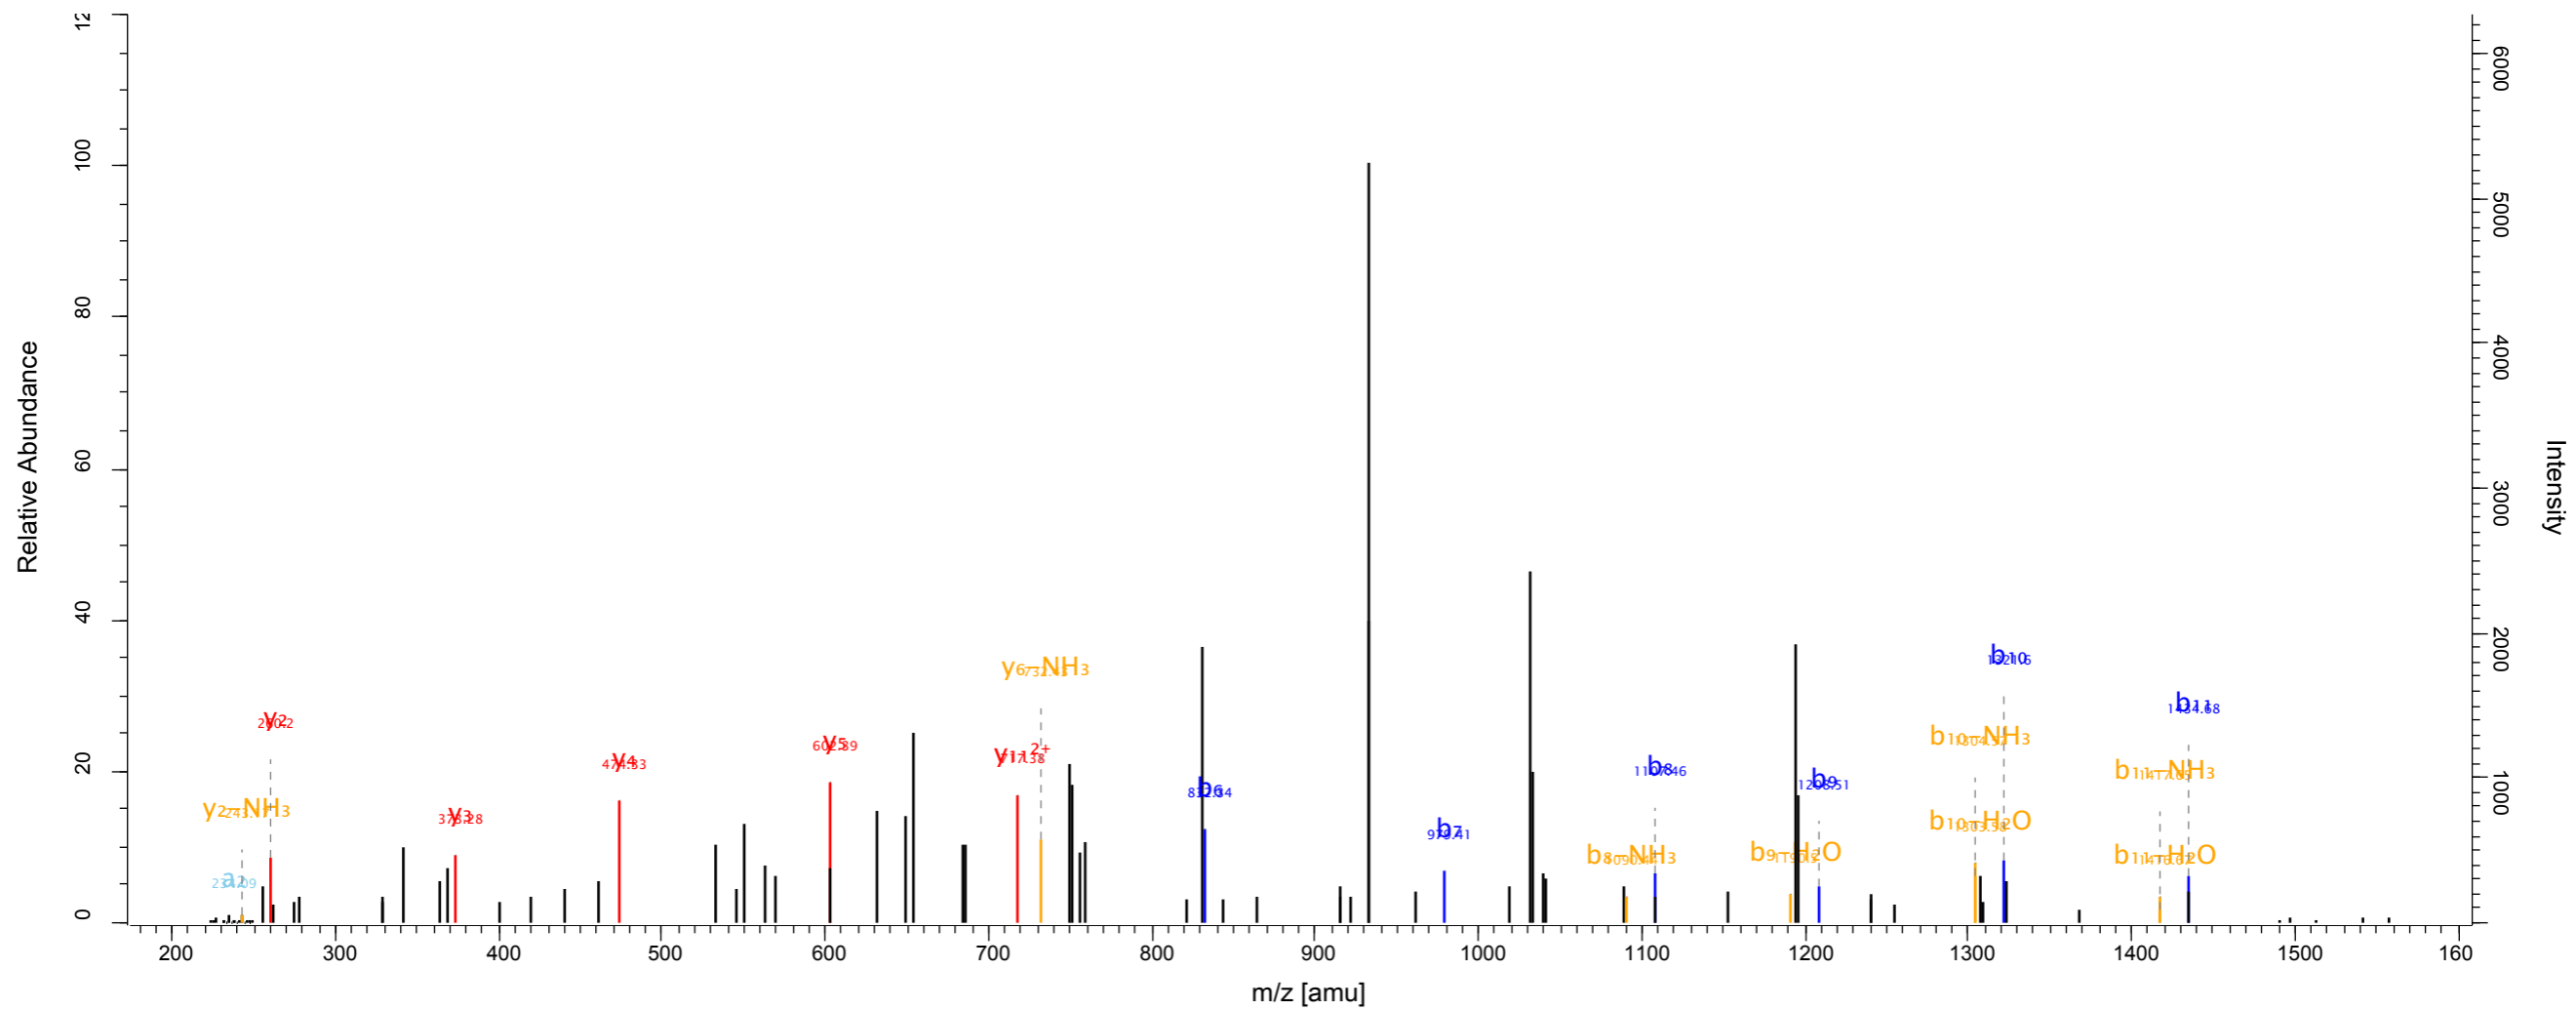

Scan number 8170 Raw file SKaraca\_LMB\_H1\_Forward\_041011\_12\_rep2  
 Method ITMS; CID Pepti... 94.54

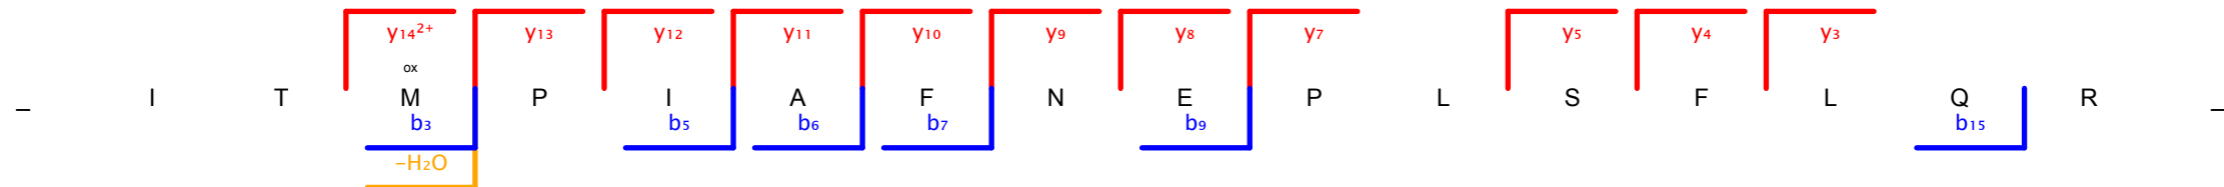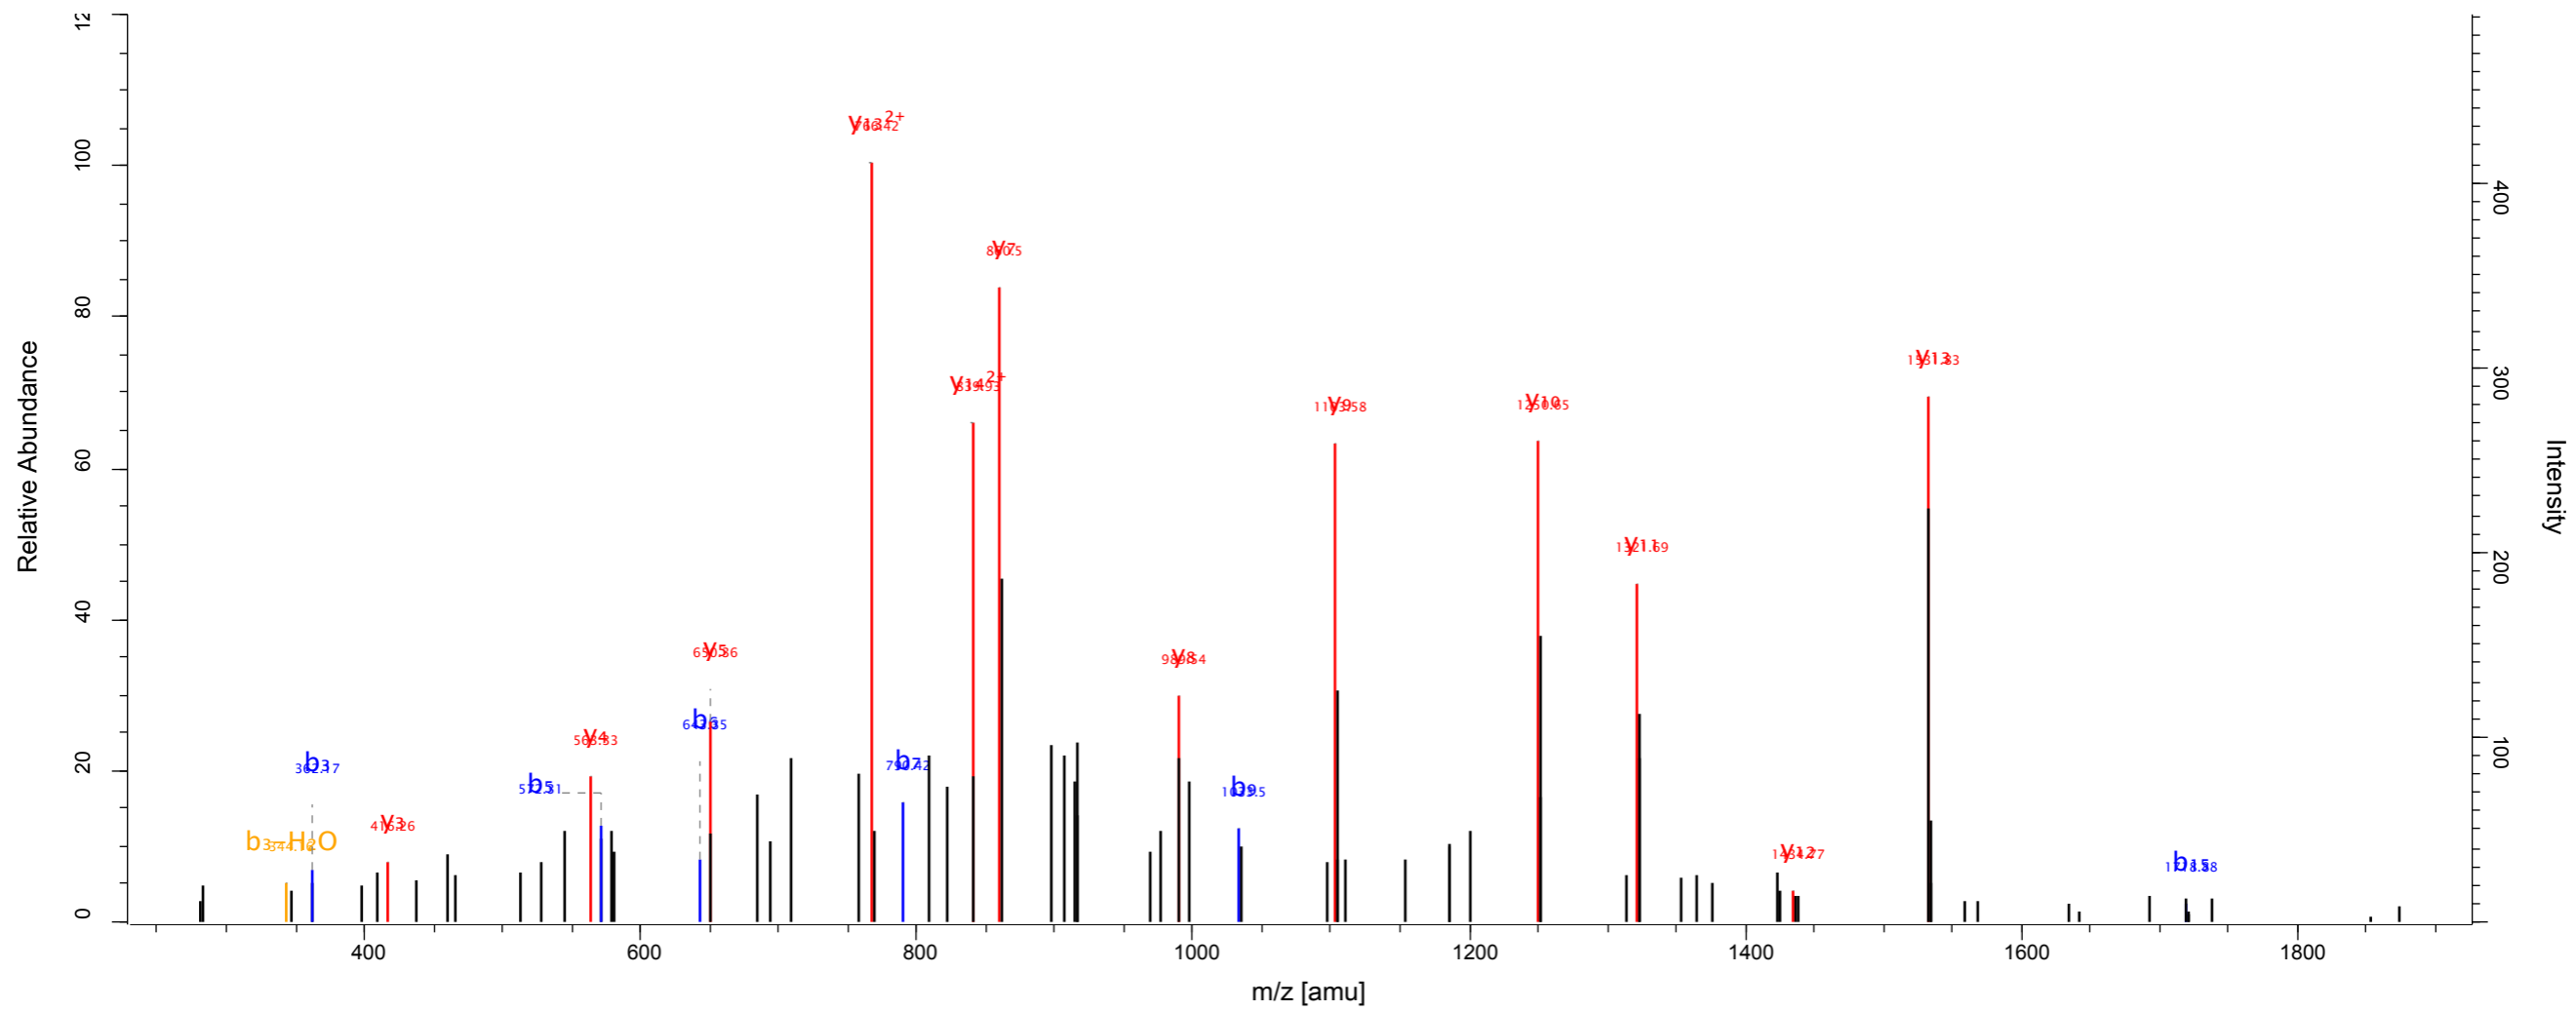

Scan number 9244 Raw file SKaraca\_LMB\_H1\_Forward\_041011\_13\_rep1  
 Method ITMS; CID Pepti... 121.32

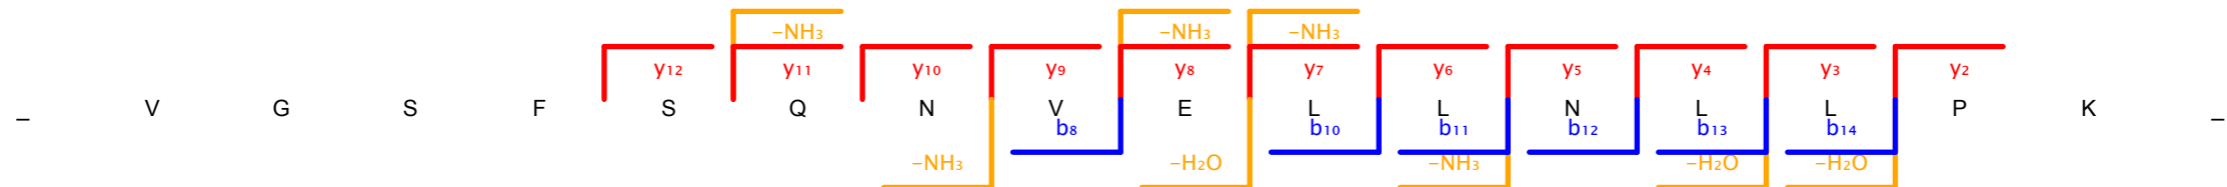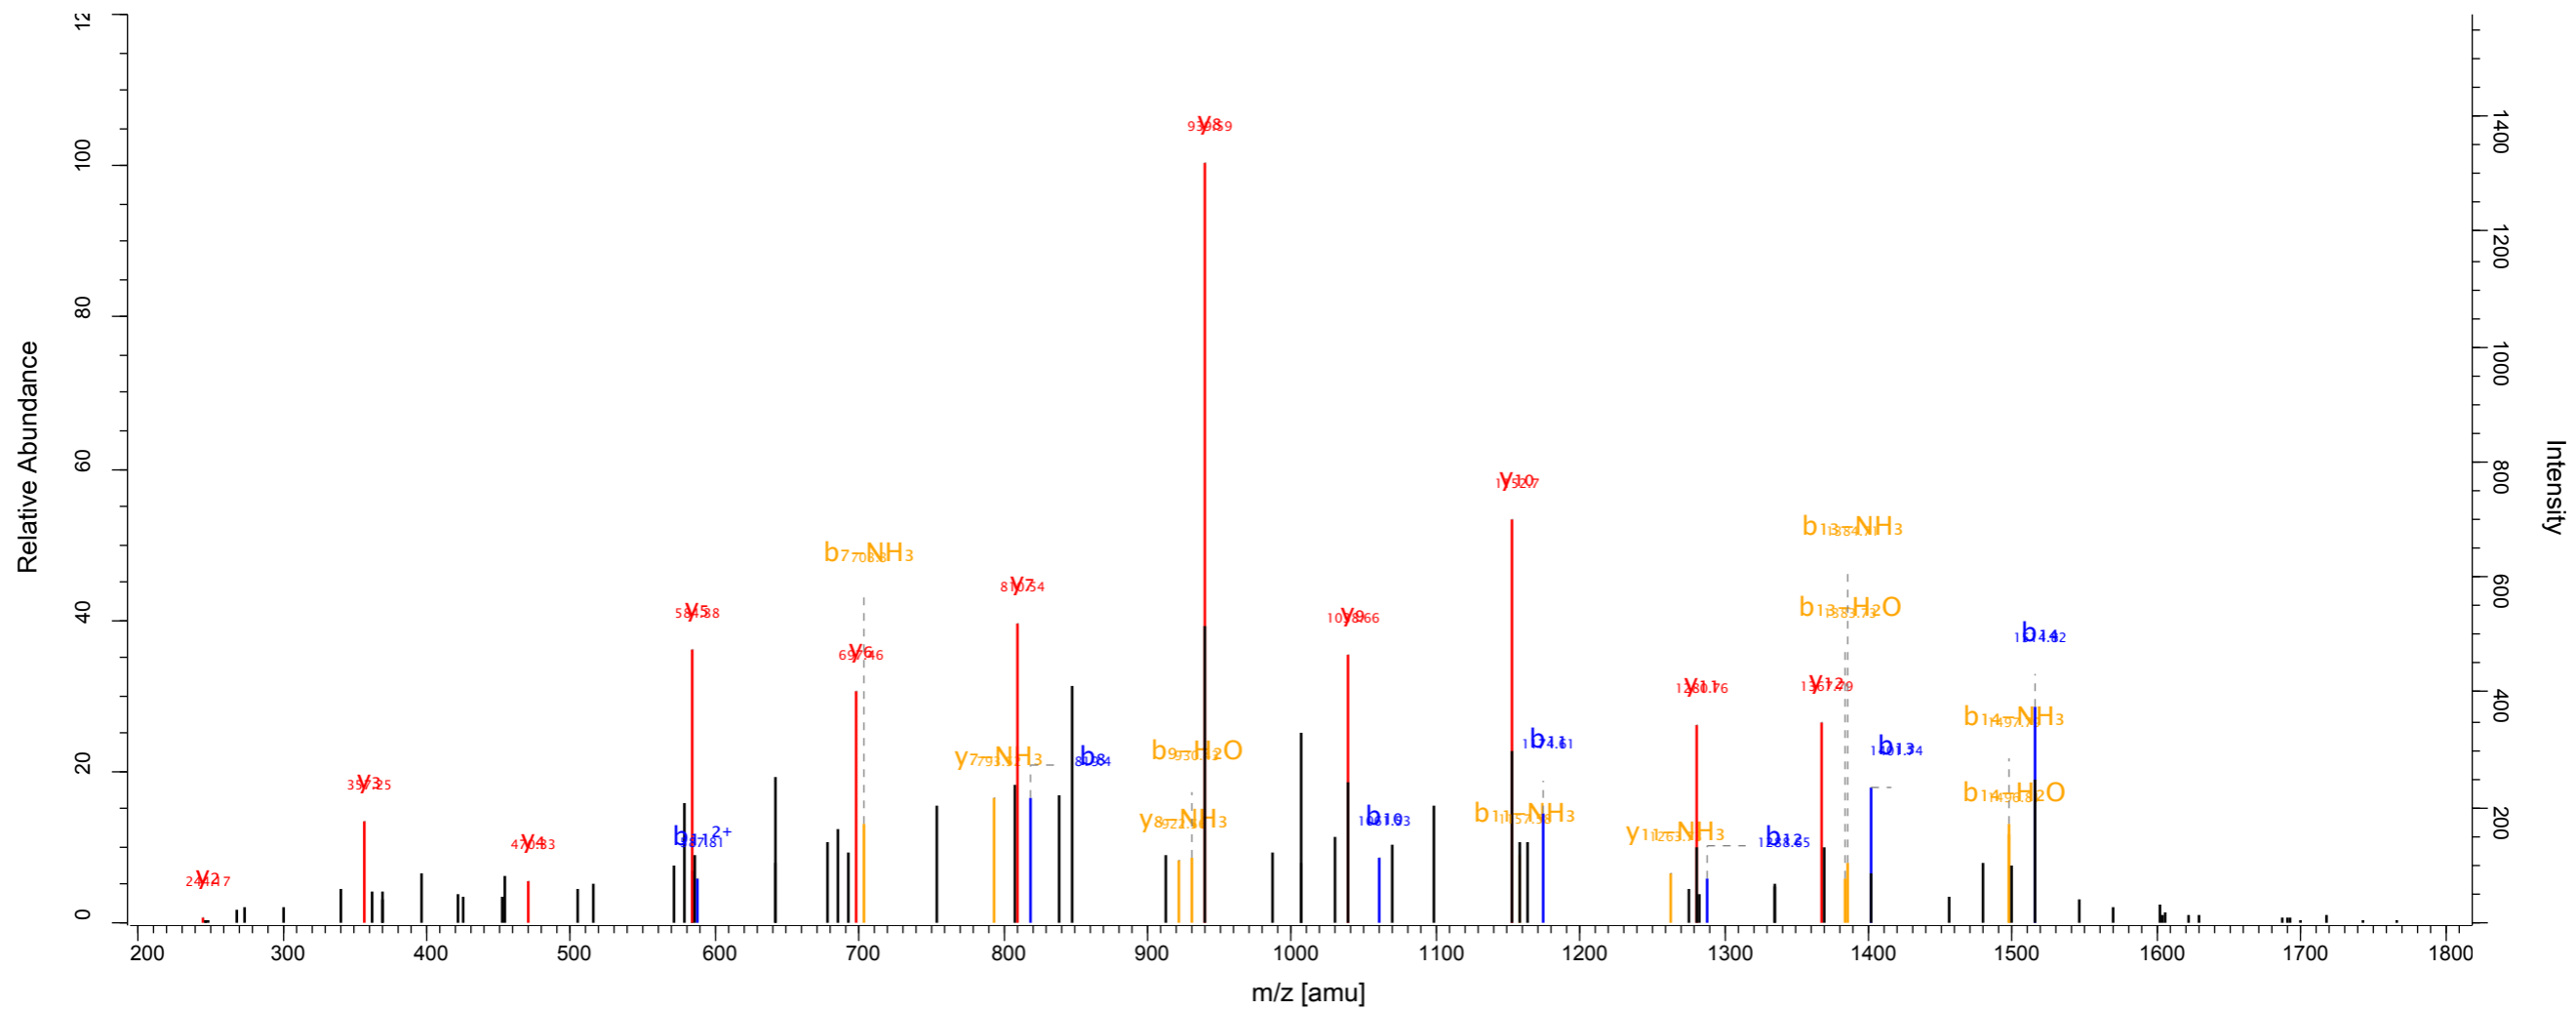

Scan number 10164 Raw file SKaraca\_LMB\_H1\_Forward\_041011\_13\_rep2  
 Method ITMS; CID Pepti... 196.62

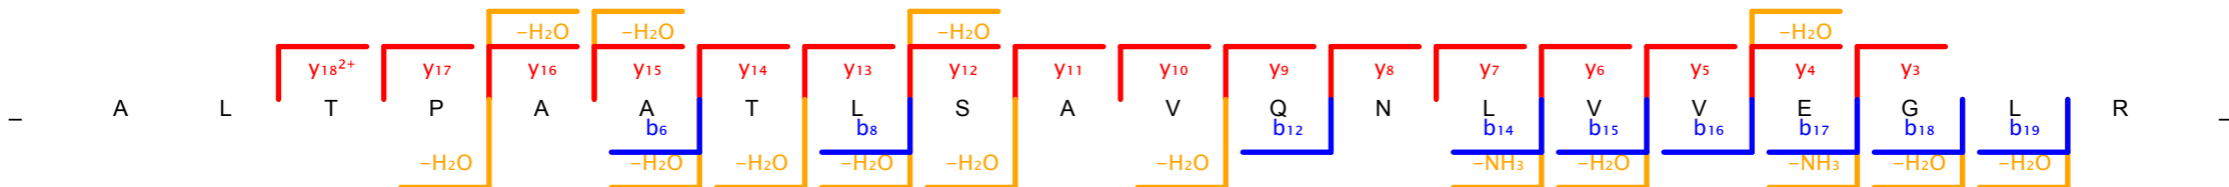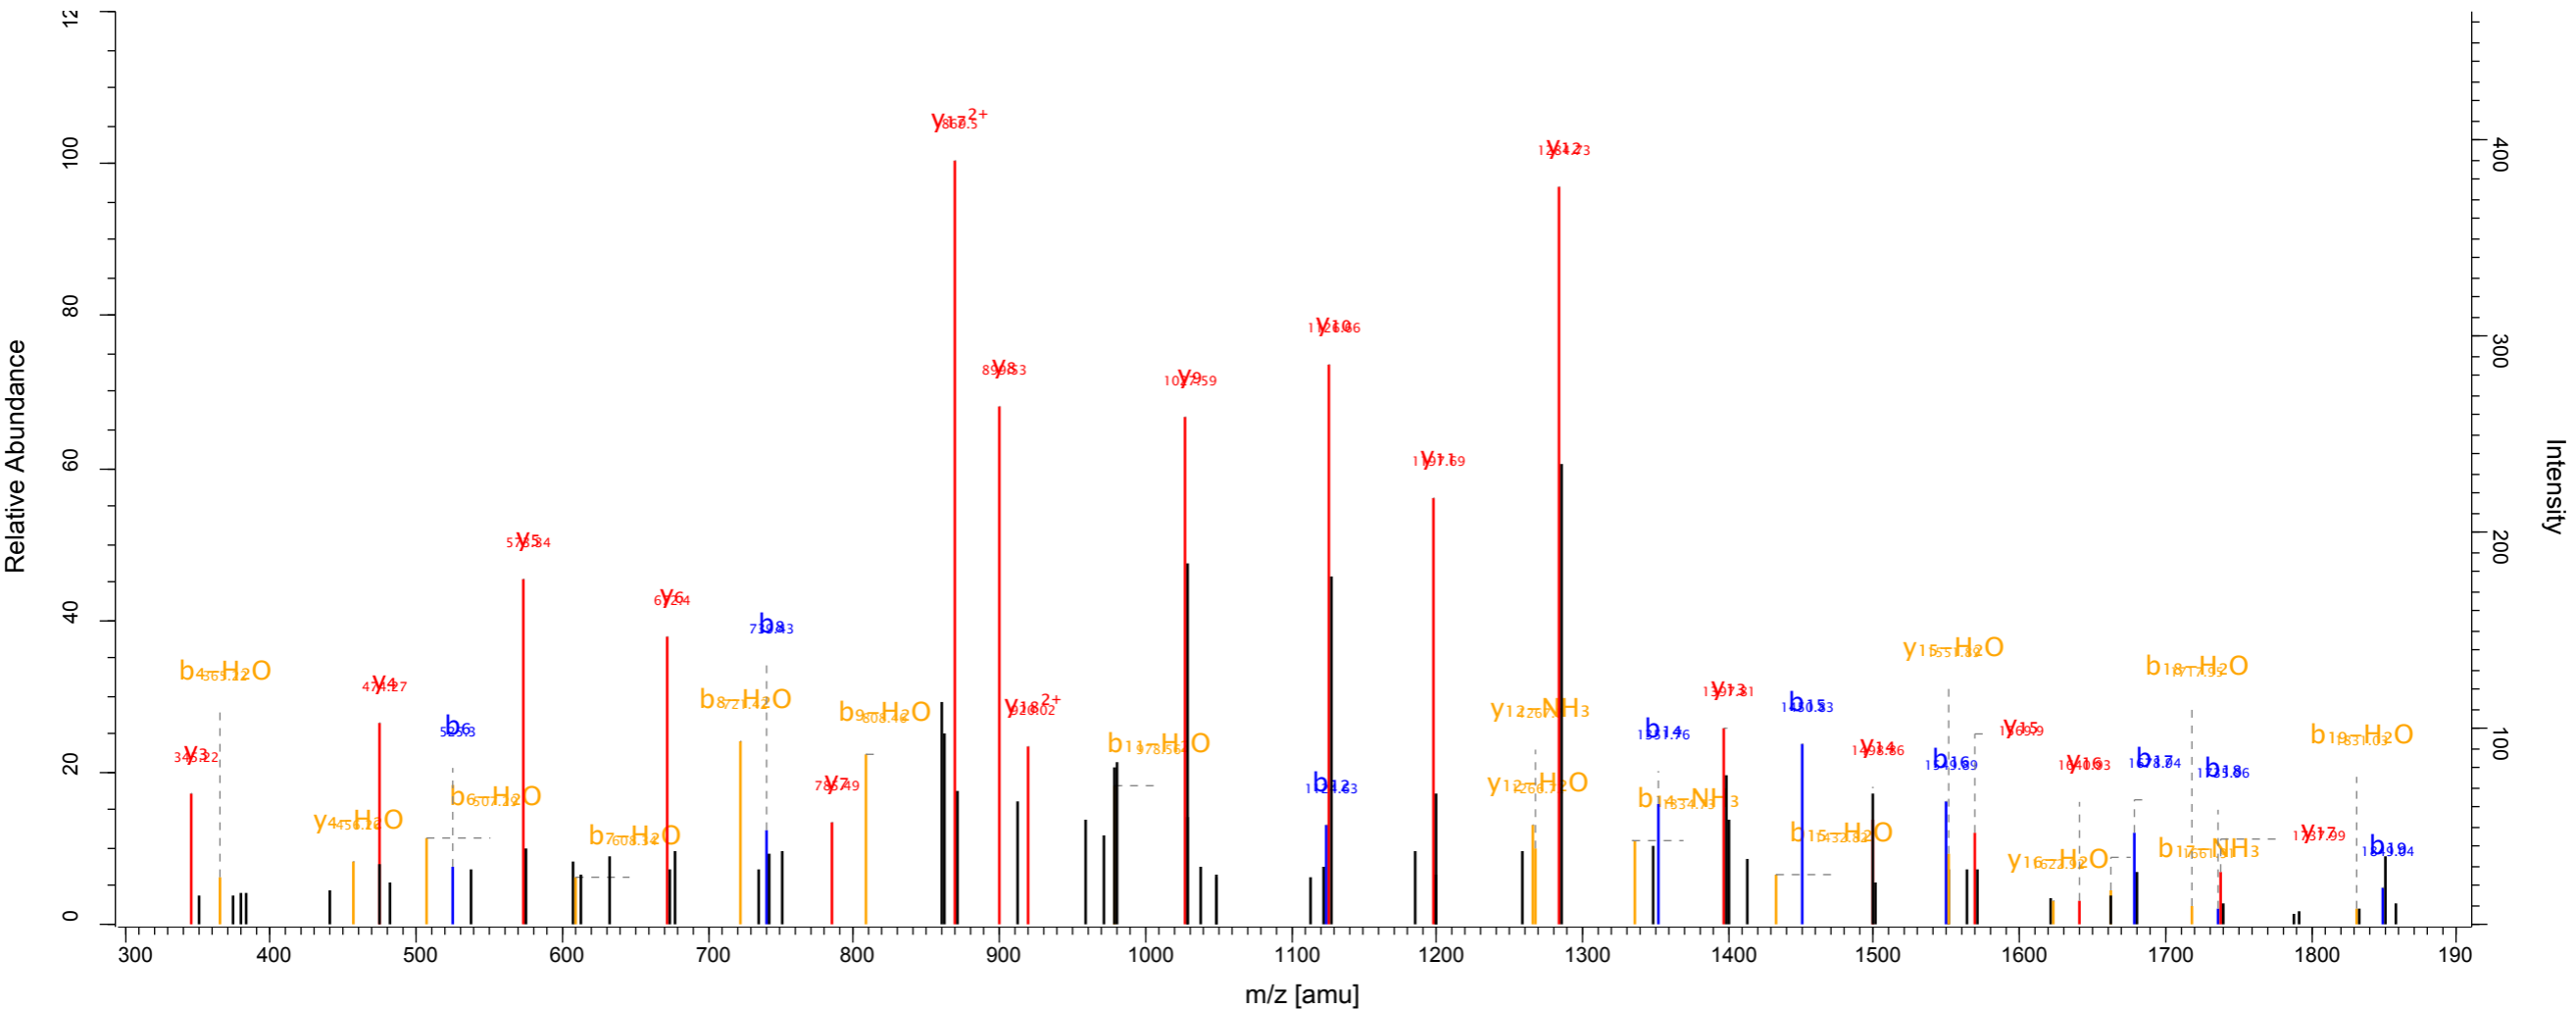

Scan number 1444 Raw file SKaraca\_LMB\_H1\_Forward\_041011\_14\_rep1  
 Method ITMS; CID Pepti... 98.1

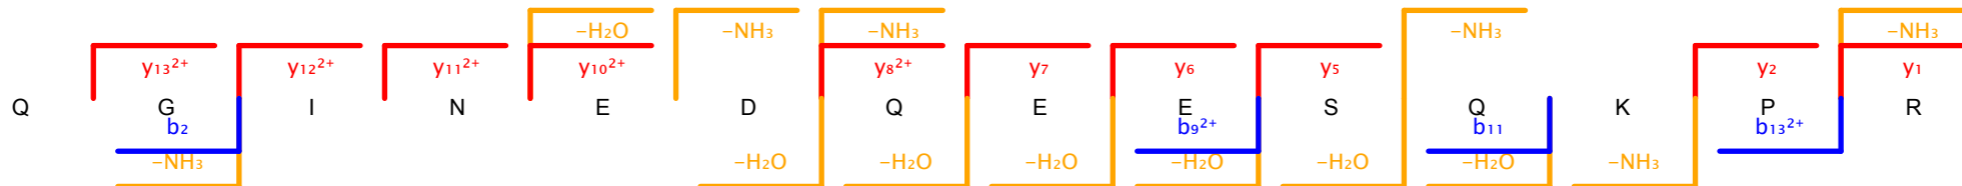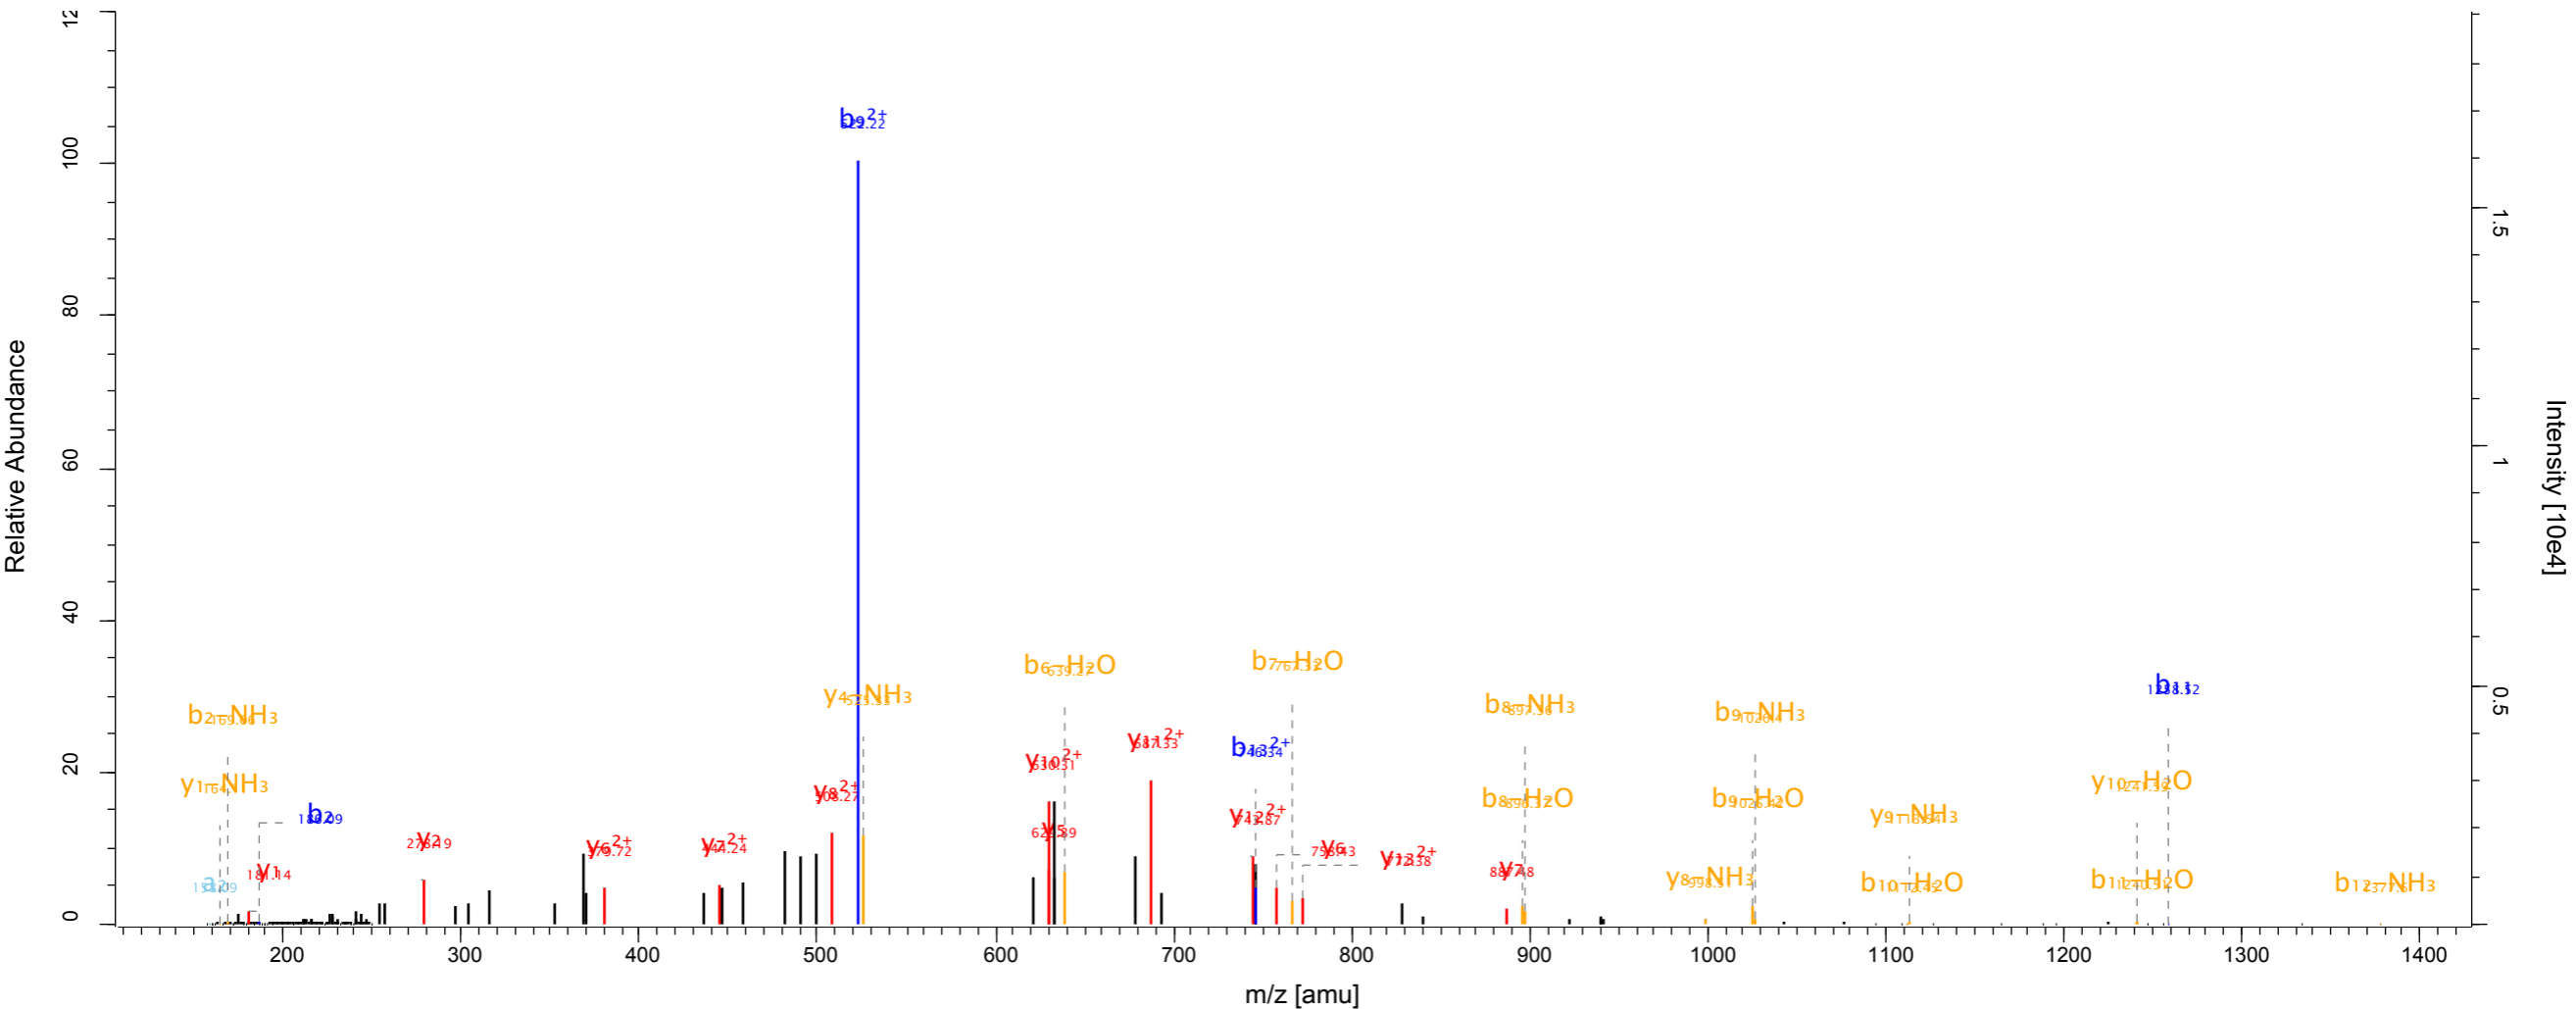

Scan number 4396 Raw file SKaraca\_LMB\_H1\_Forward\_041011\_14\_rep2  
 Method ITMS; CID Pepti... 125.97

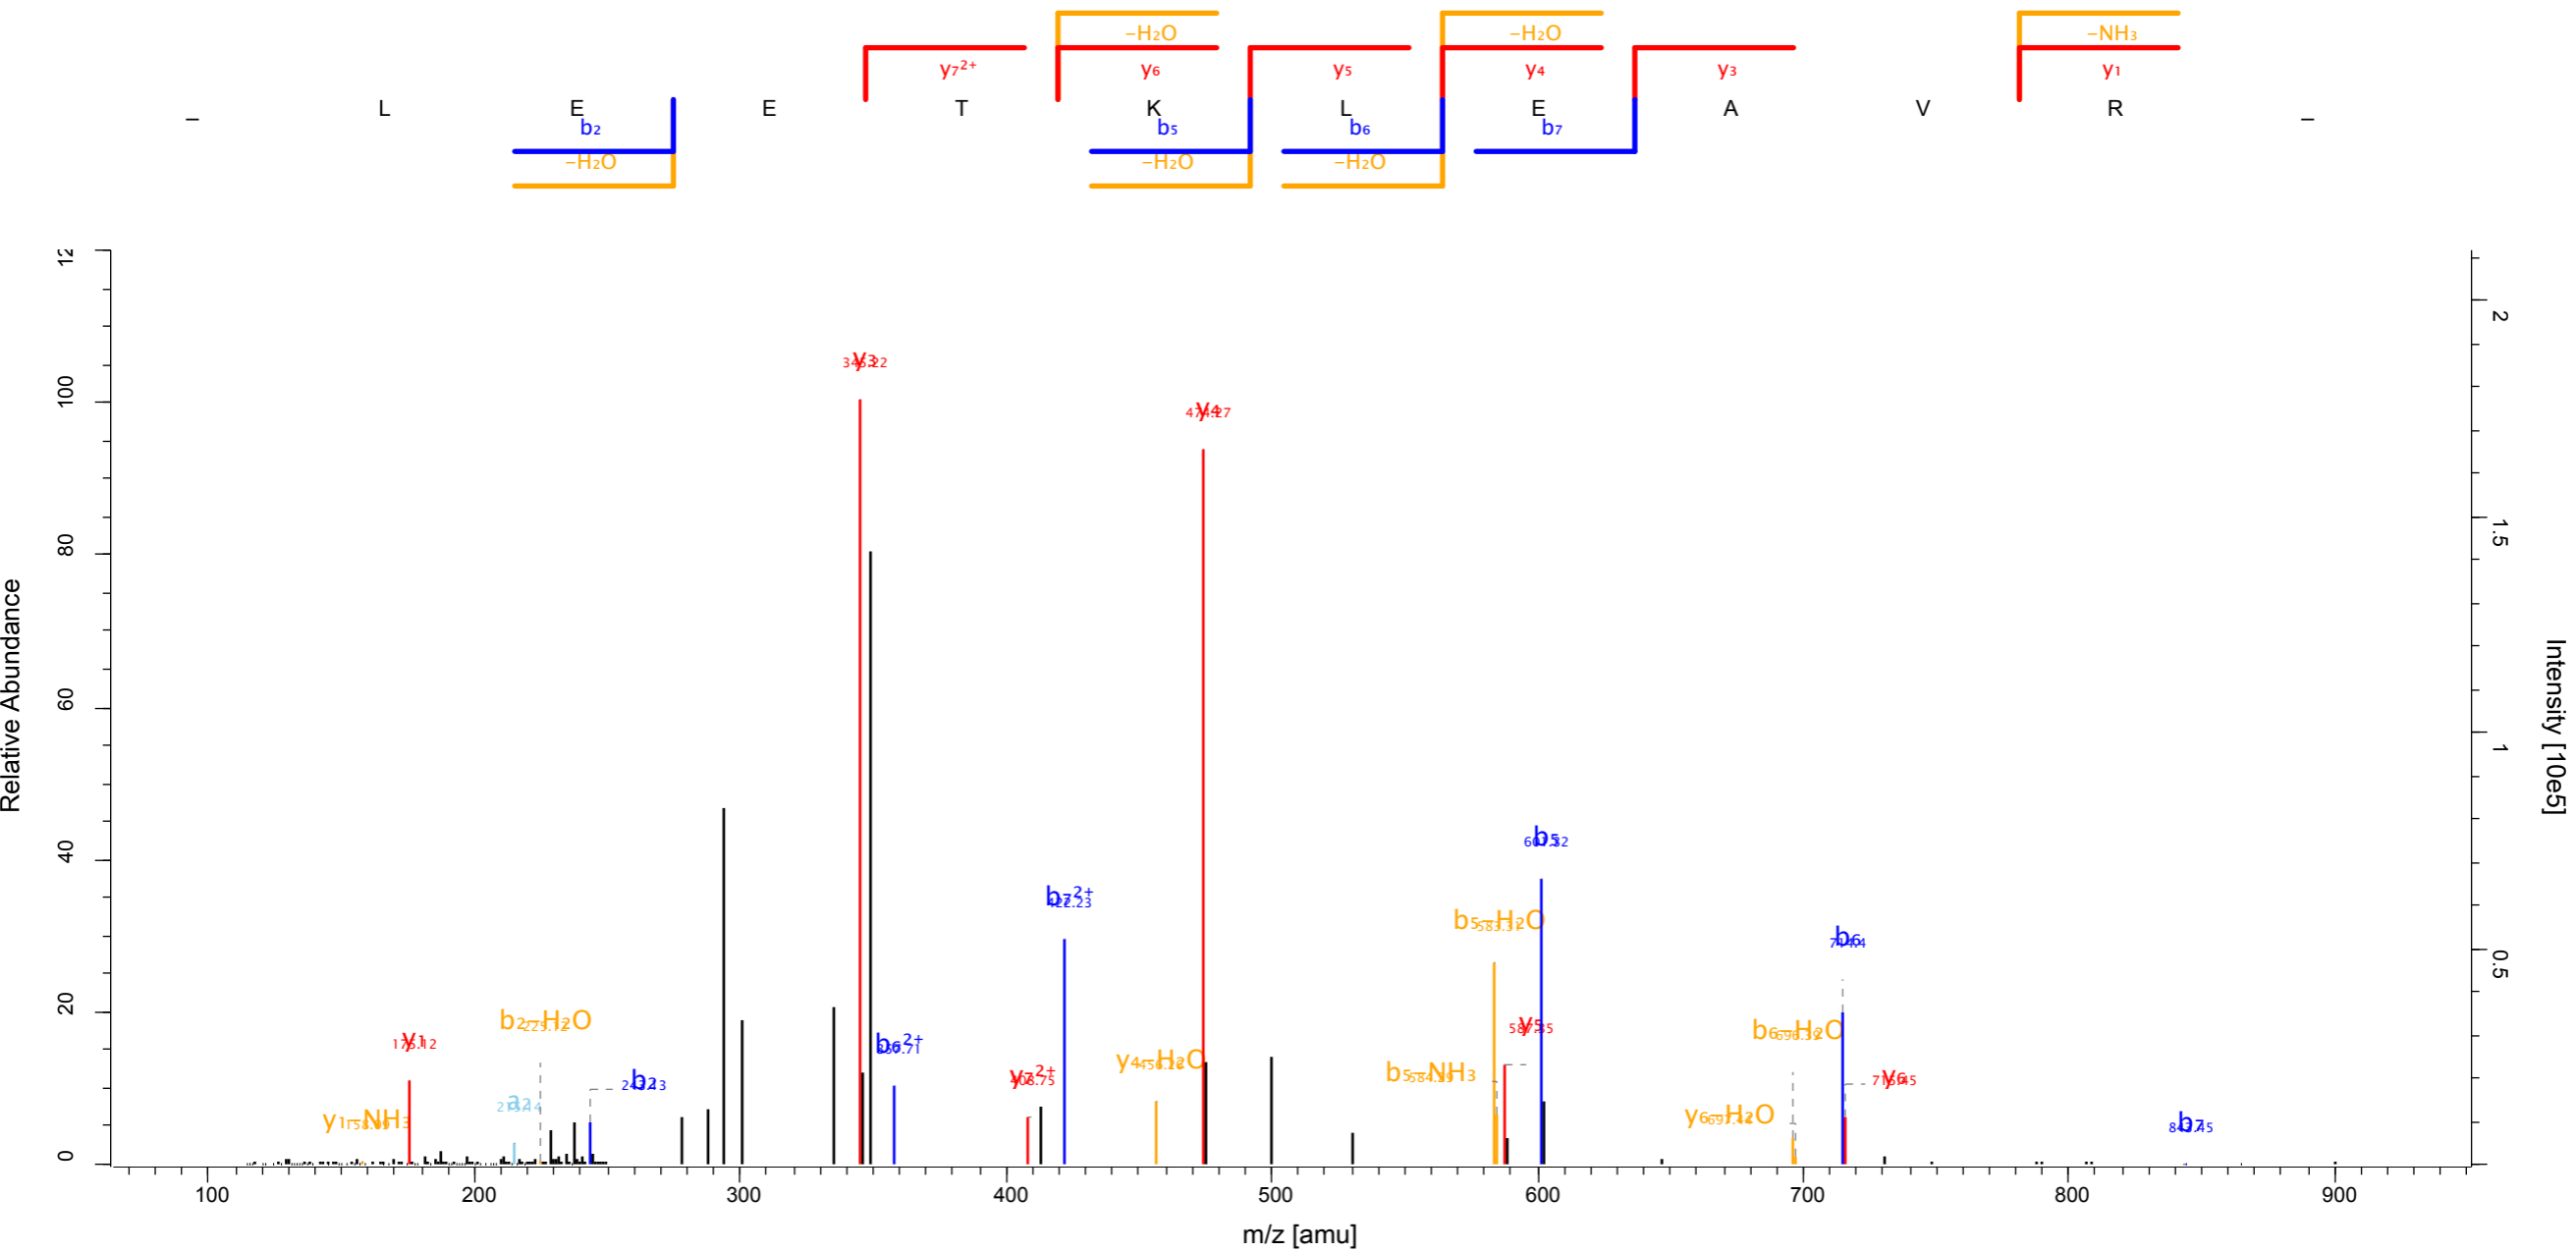

Scan number 7262 Raw file SKaraca\_LMB\_H1\_Forward\_041011\_14\_rep2  
 Method ITMS; CID Pepti... 127.83

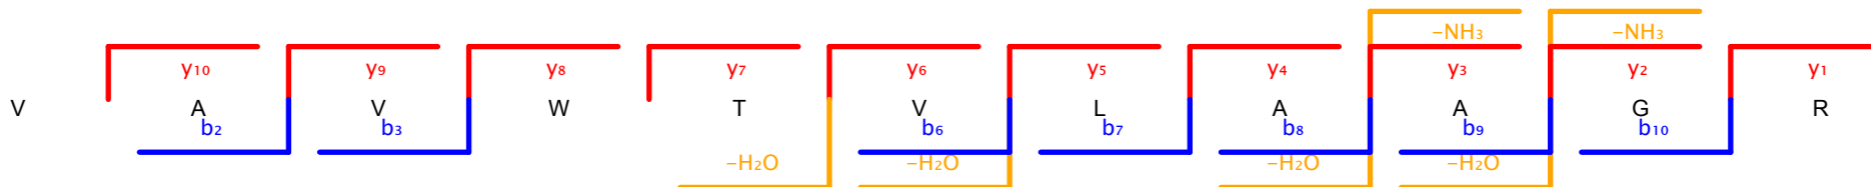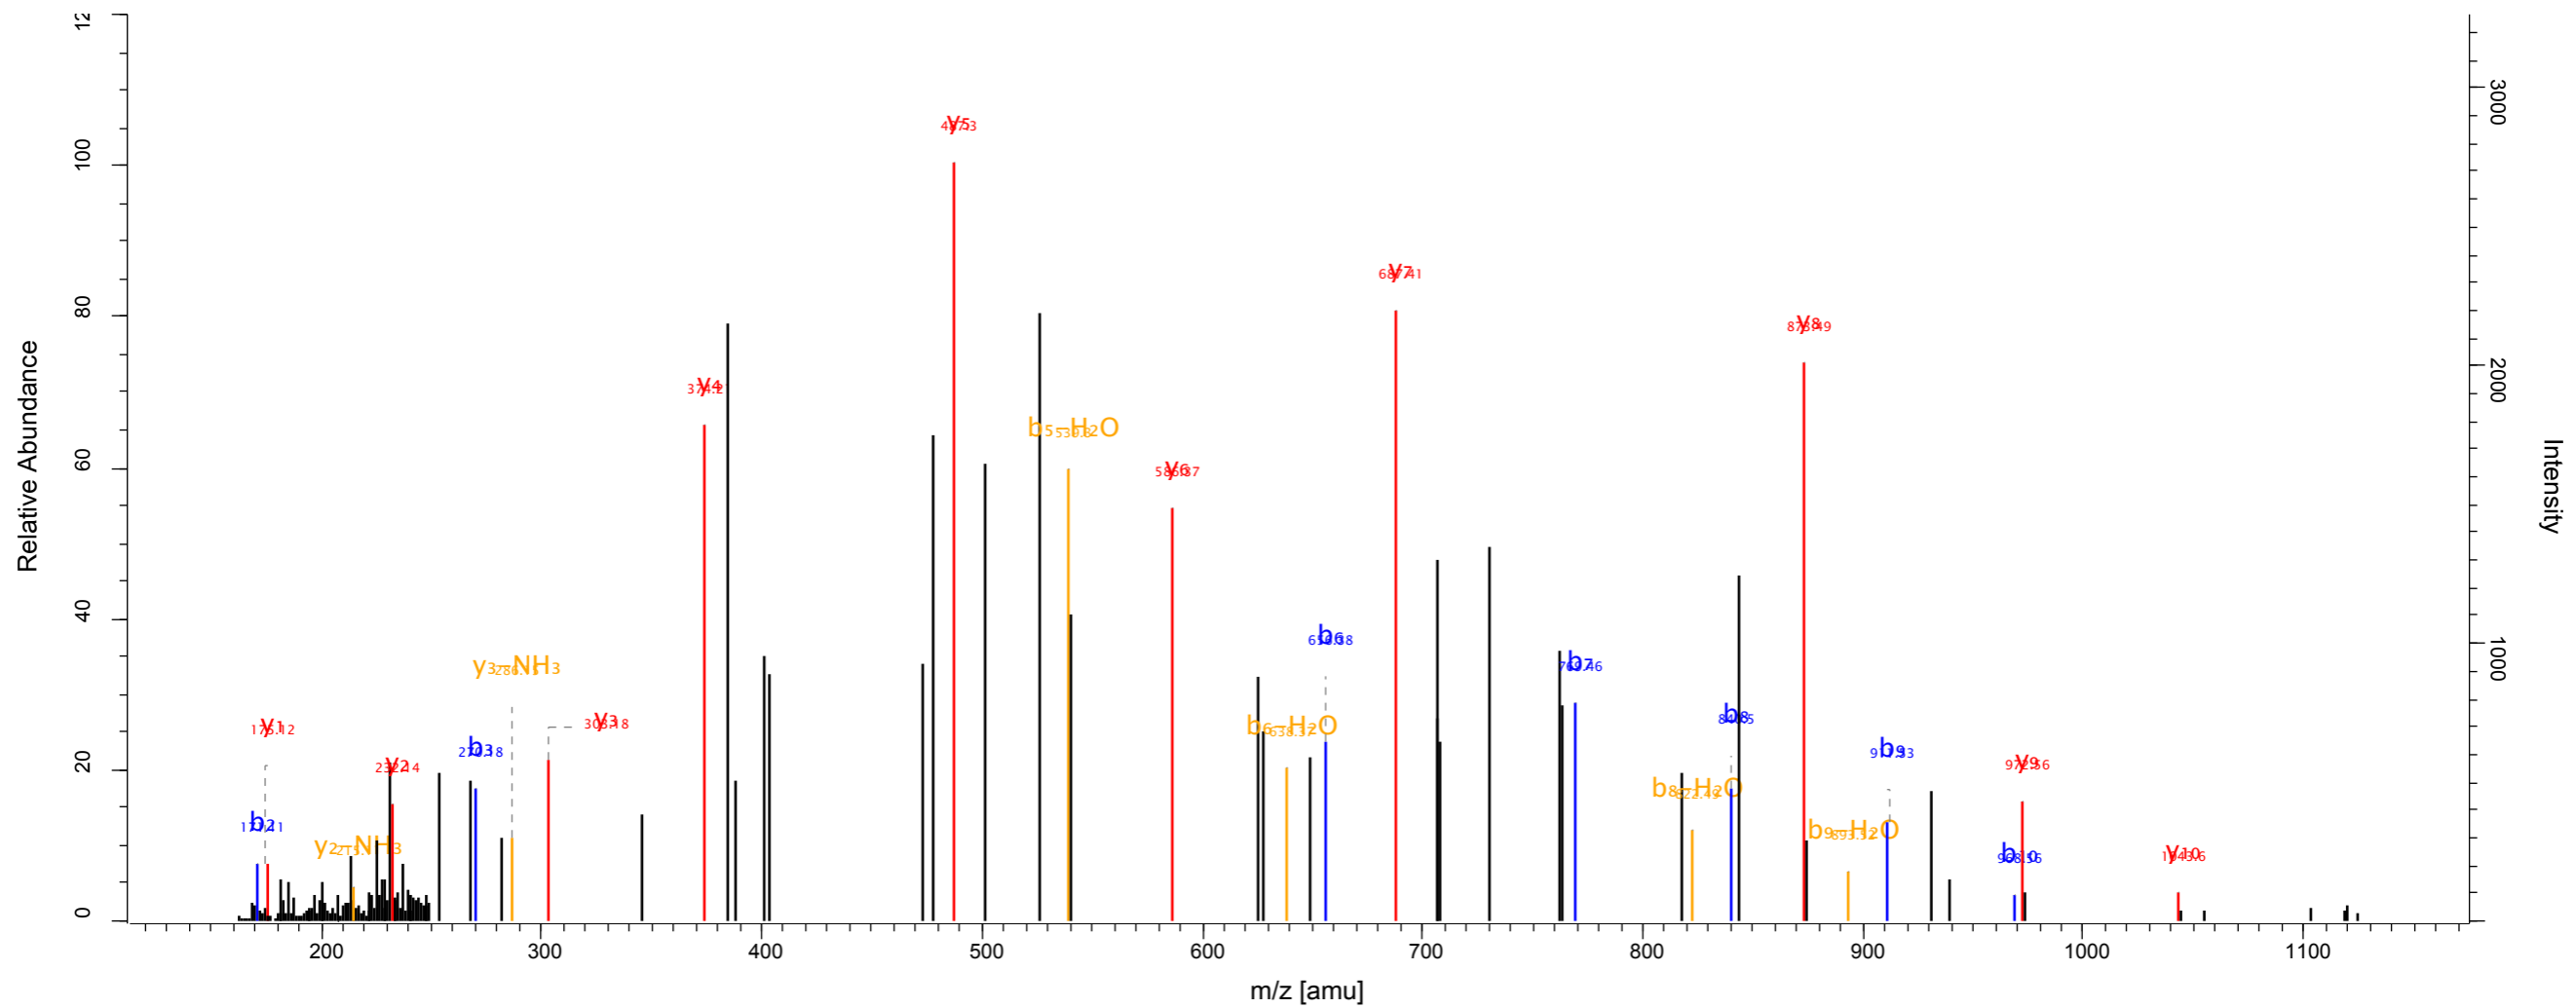

Scan number 2523 Raw file SKaraca\_LMB\_H1\_Forward\_041011\_15\_rep1  
 Method ITMS; CID Pepti... 172.76

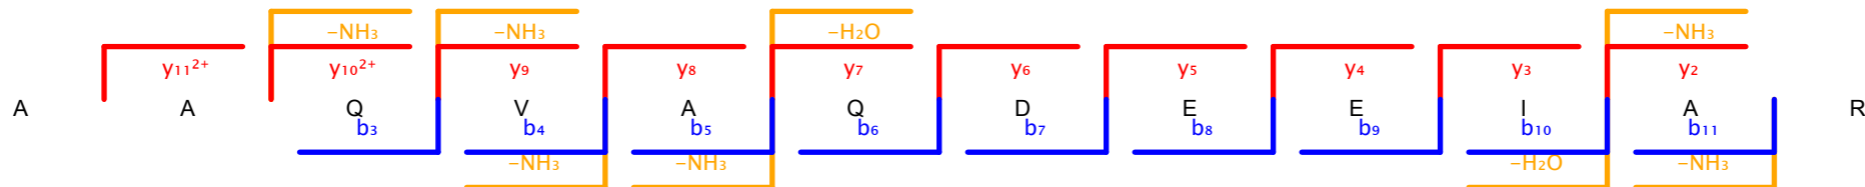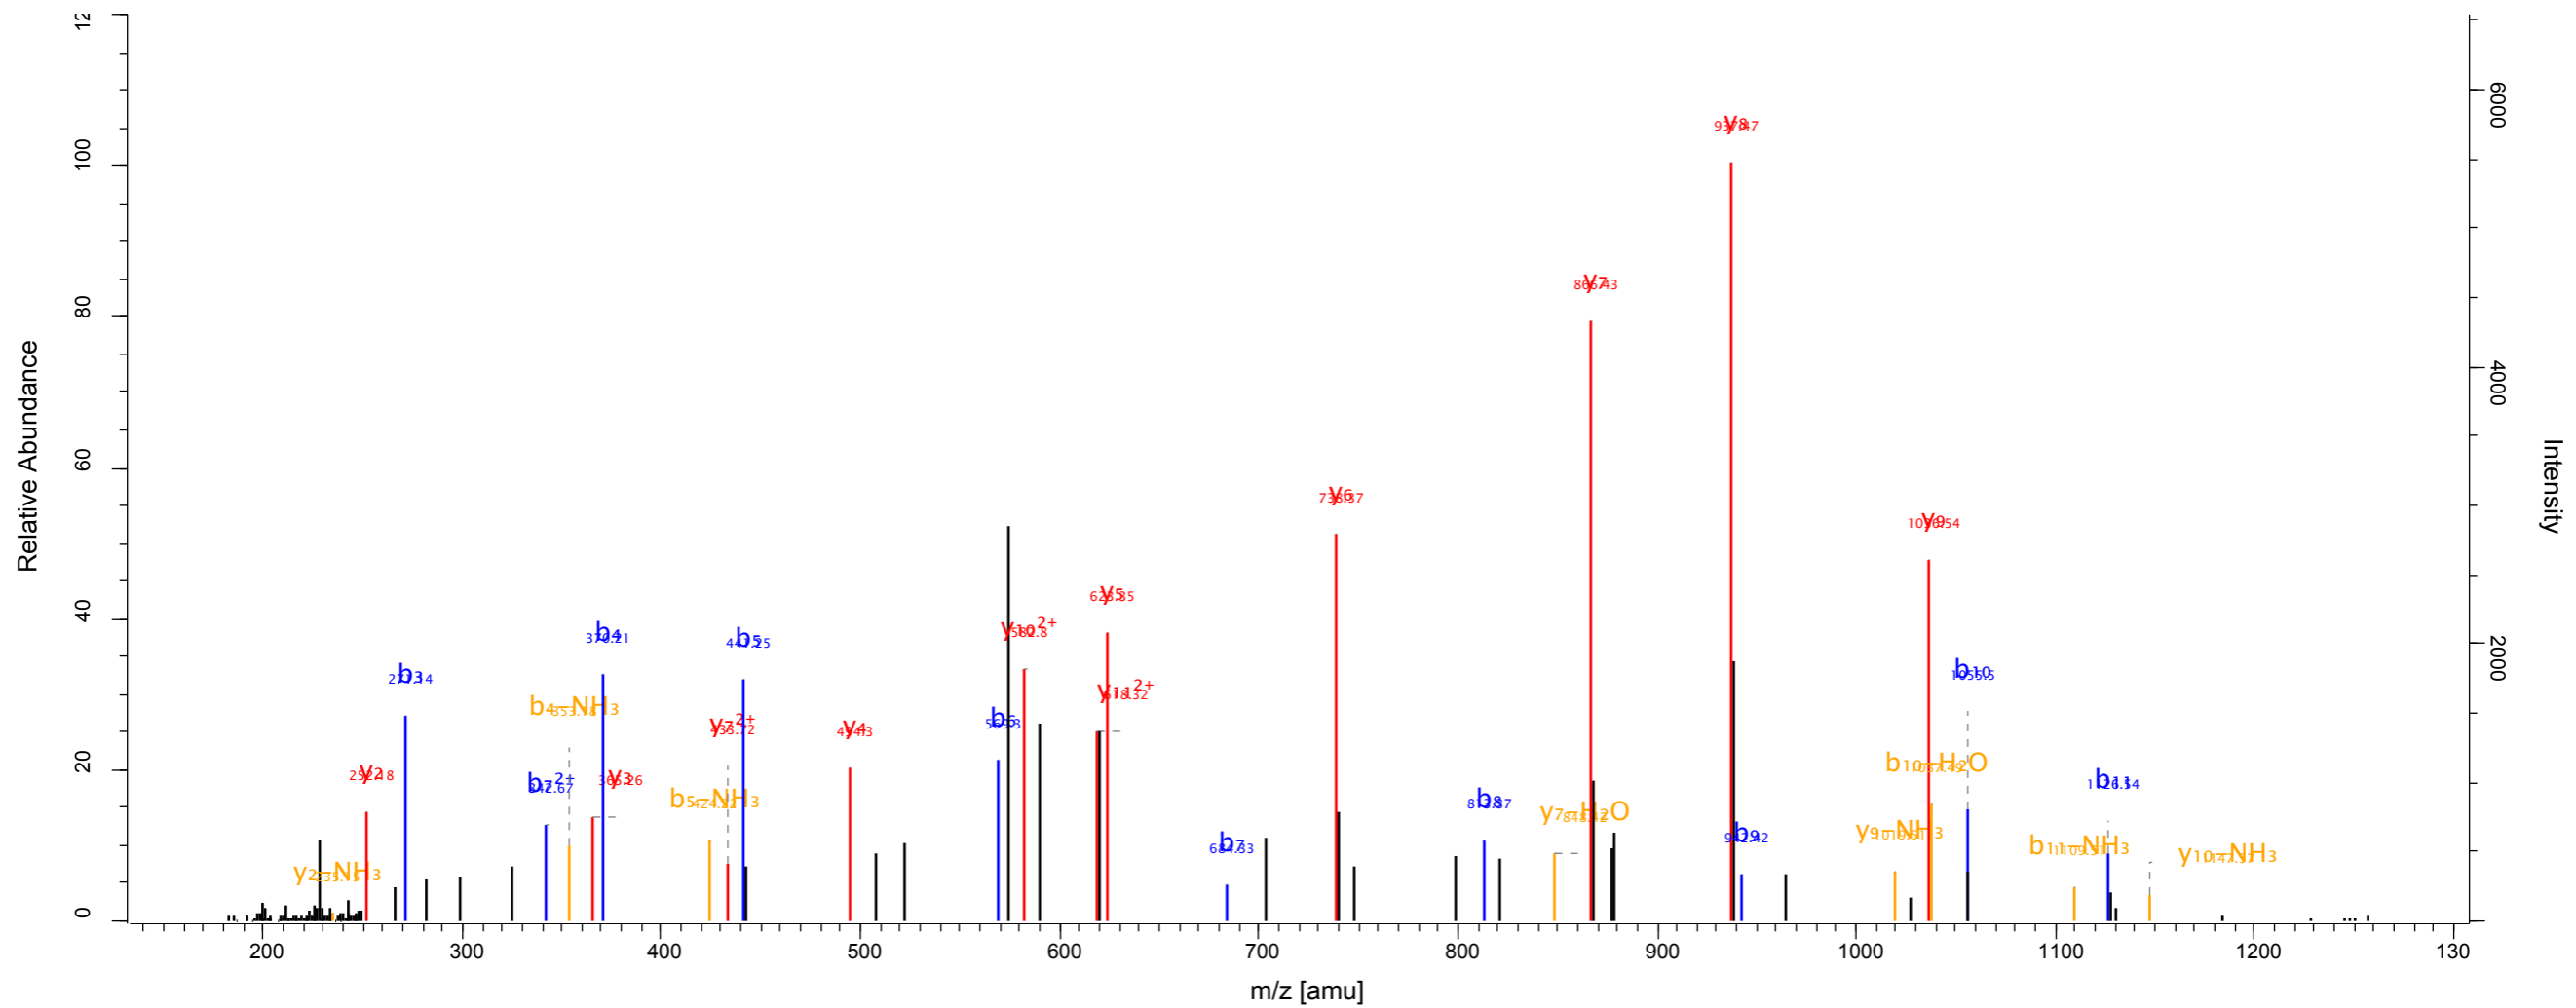



Scan number 8197 Raw file SKaraca\_LMB\_H1\_Forward\_041011\_15\_rep2  
 Method ITMS; CID Pepti... 210.64

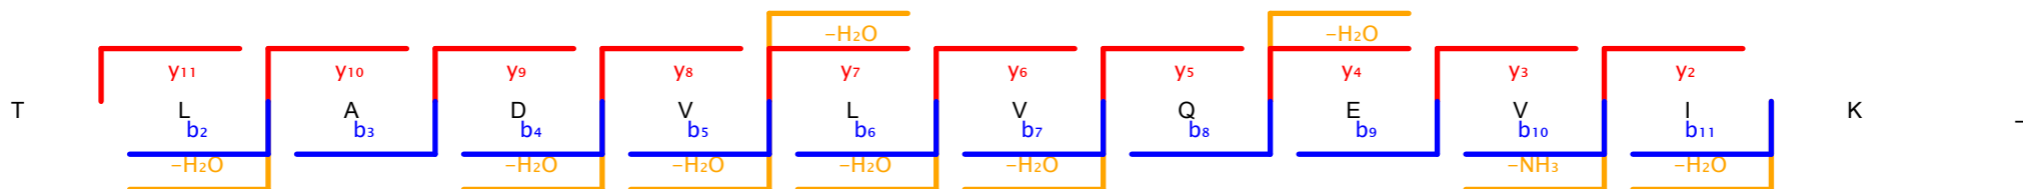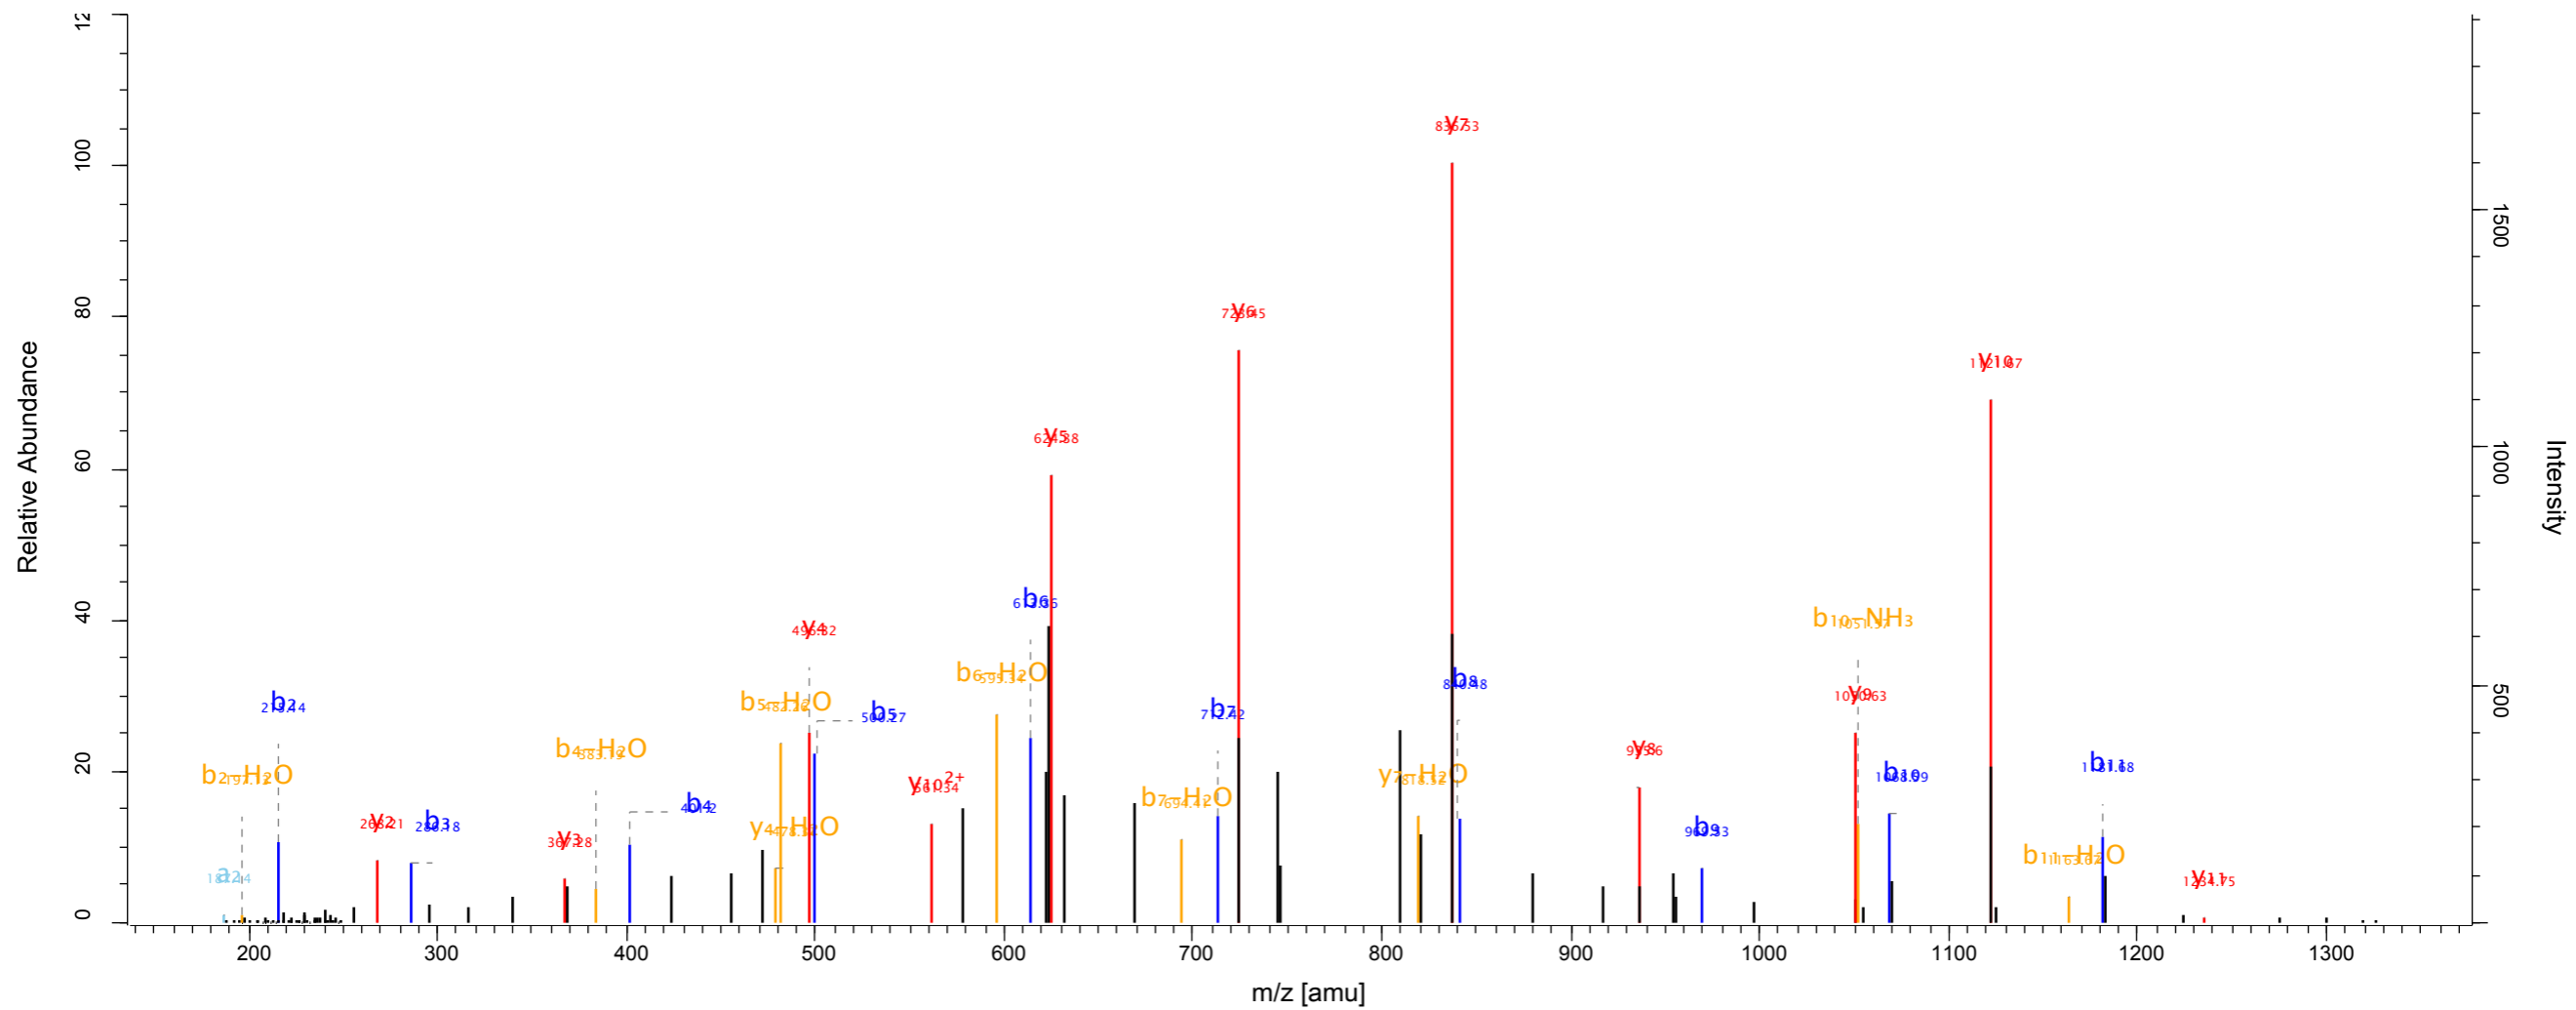

Scan number 6431 Raw file SKaraca\_LMB\_H1\_Forward\_041011\_17\_rep1  
 Method ITMS; CID Pepti... 288.45

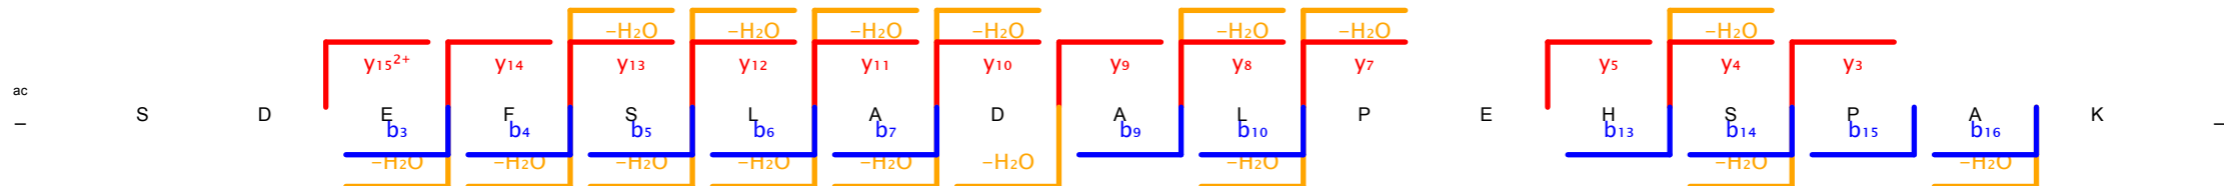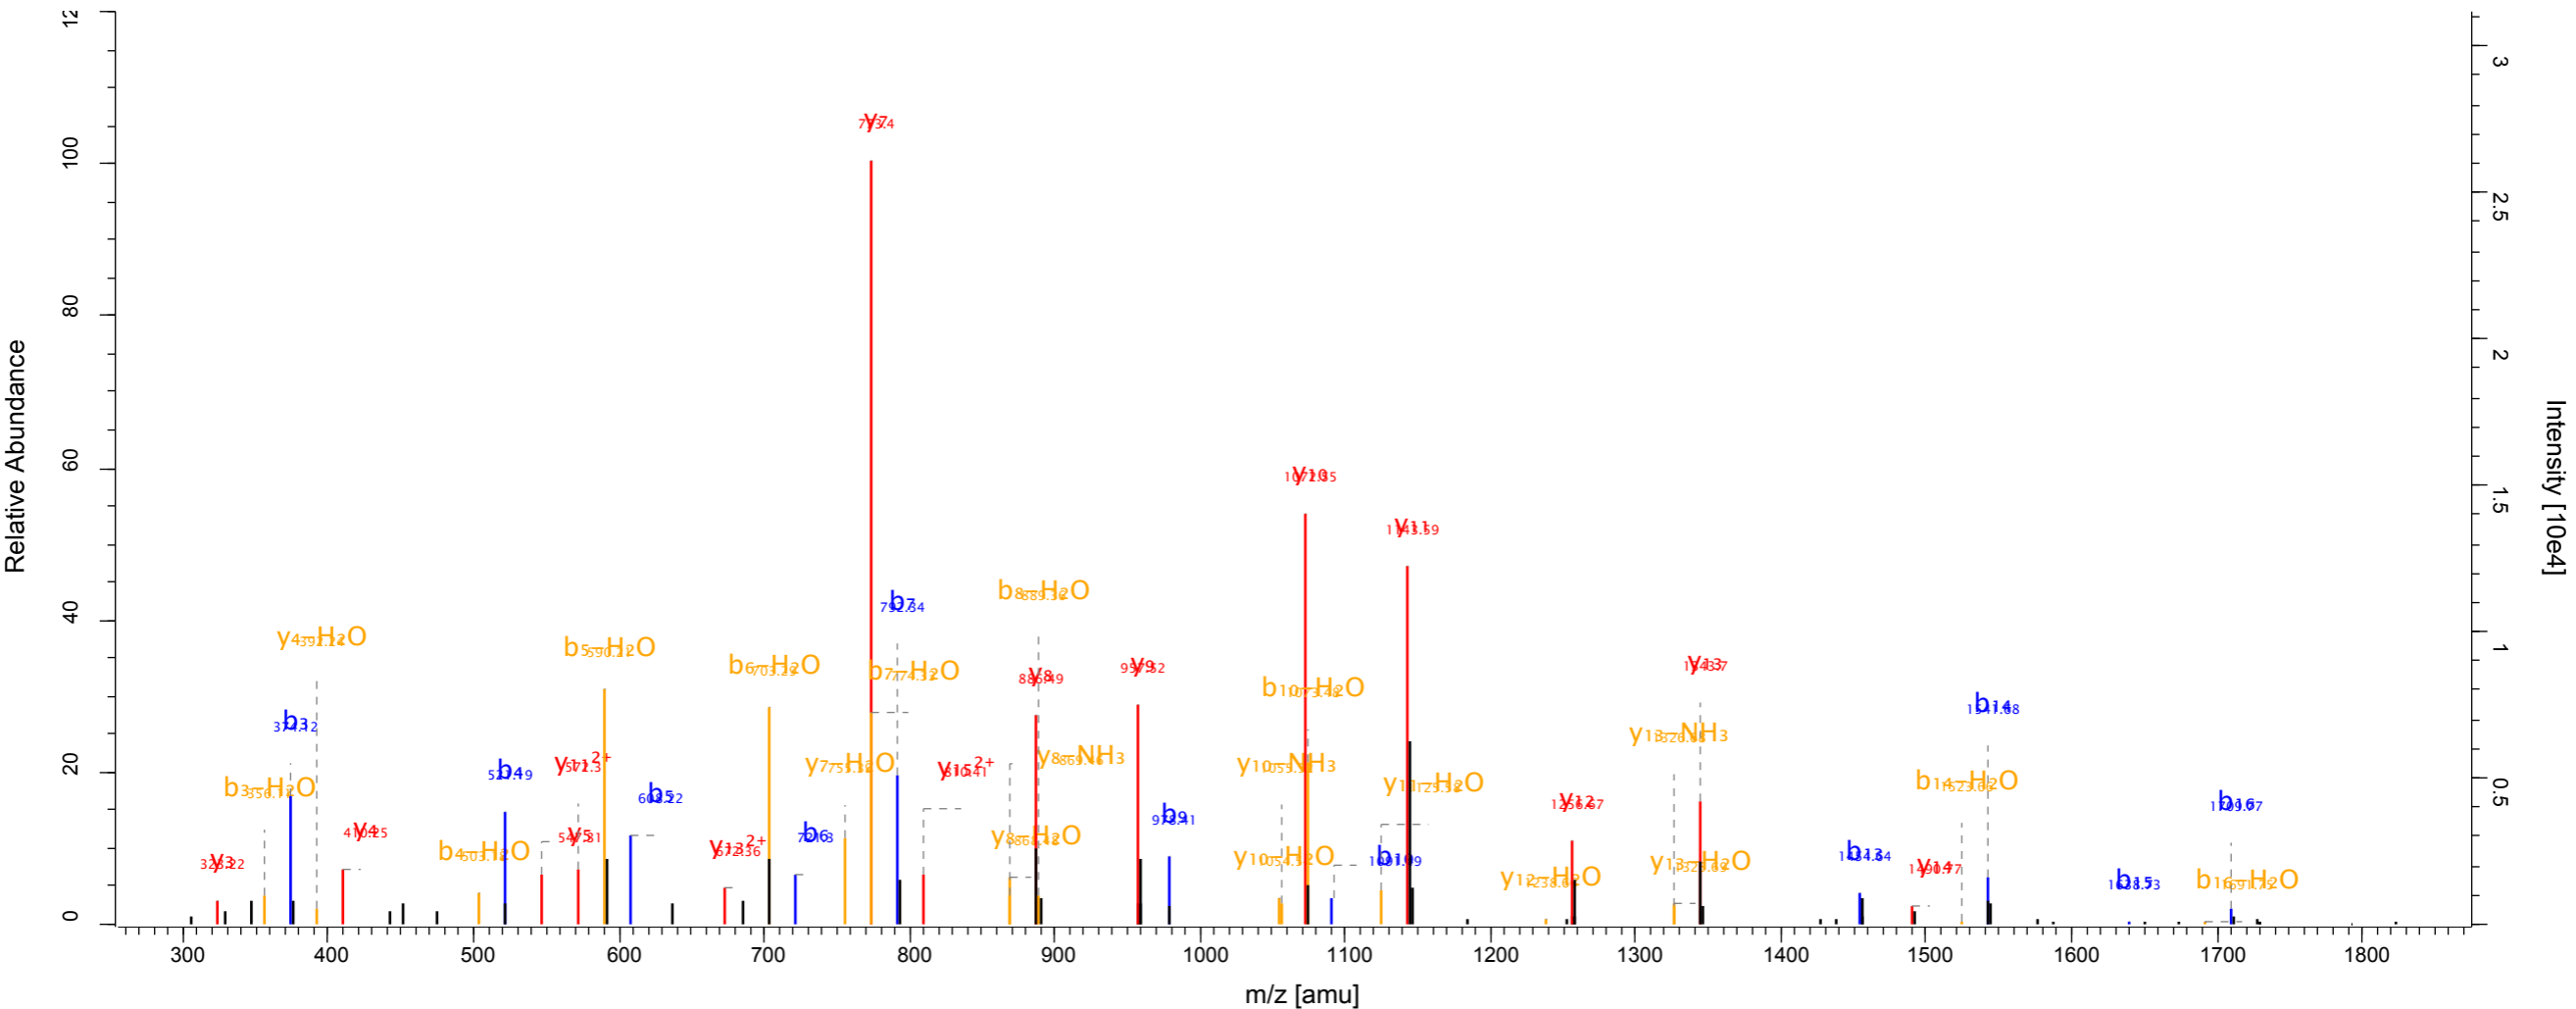

|             |           |          |                                       |
|-------------|-----------|----------|---------------------------------------|
| Scan number | 8021      | Raw file | SKaraca_LMB_H1_Forward_041011_17_rep1 |
| Method      | ITMS; CID | Pepti... | 123.42                                |

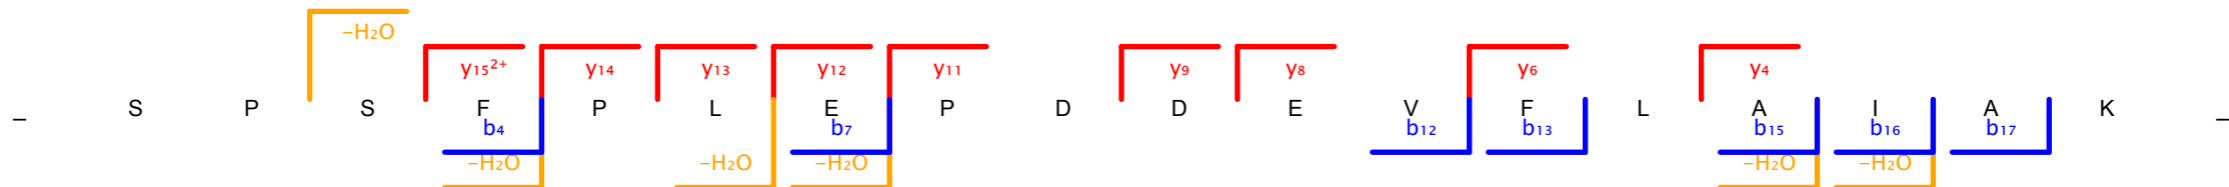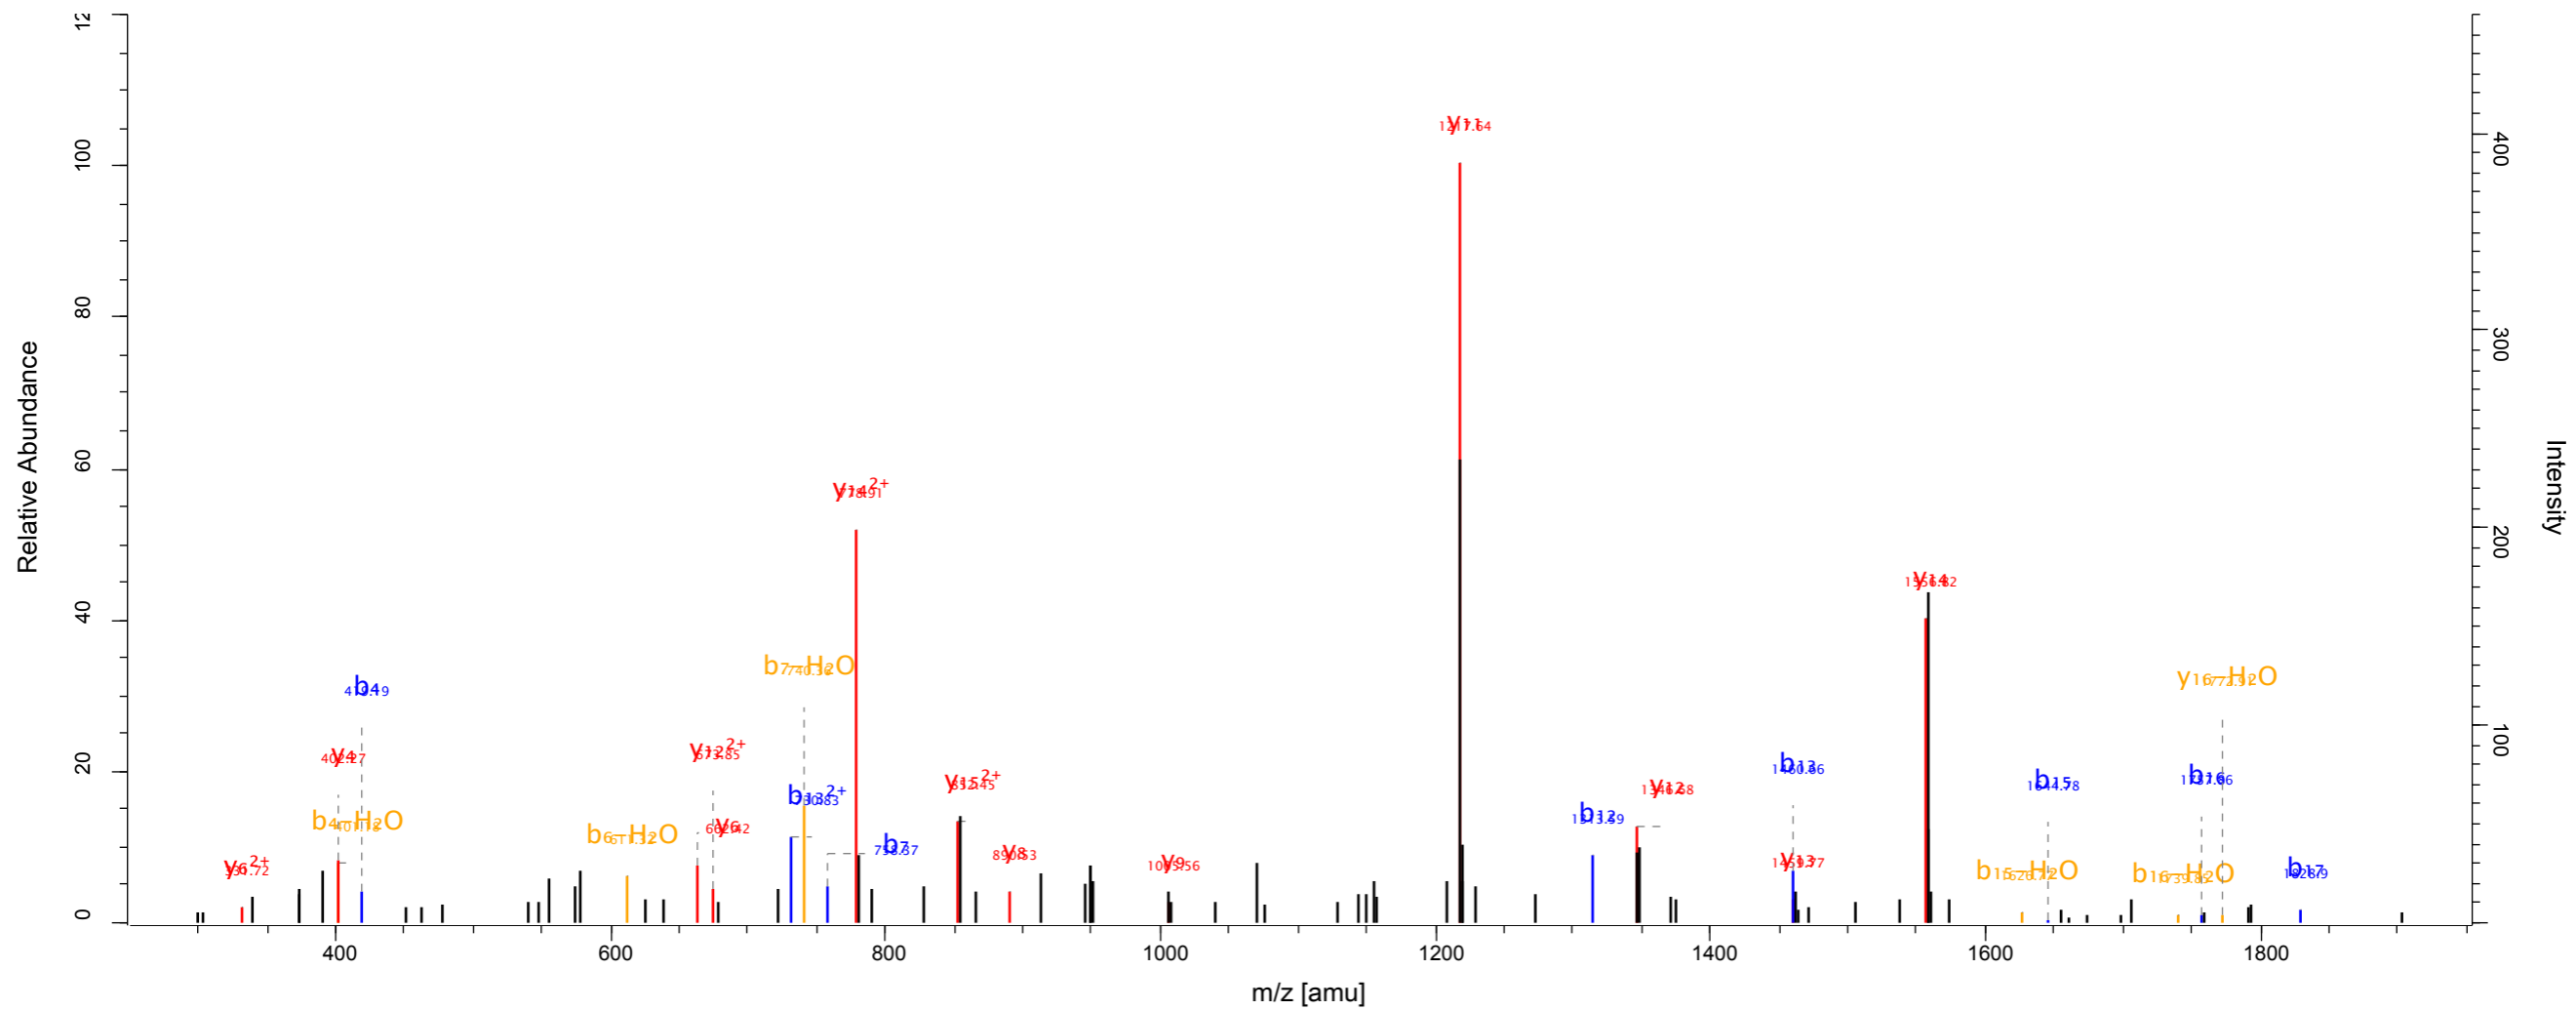

|             |           |          |                                       |
|-------------|-----------|----------|---------------------------------------|
| Scan number | 6531      | Raw file | SKaraca_LMB_H1_Forward_041011_17_rep2 |
| Method      | ITMS; CID | Pepti... | 128.86                                |

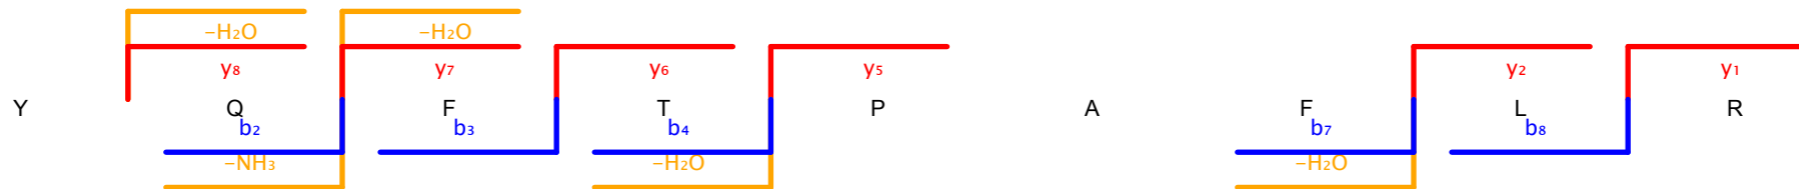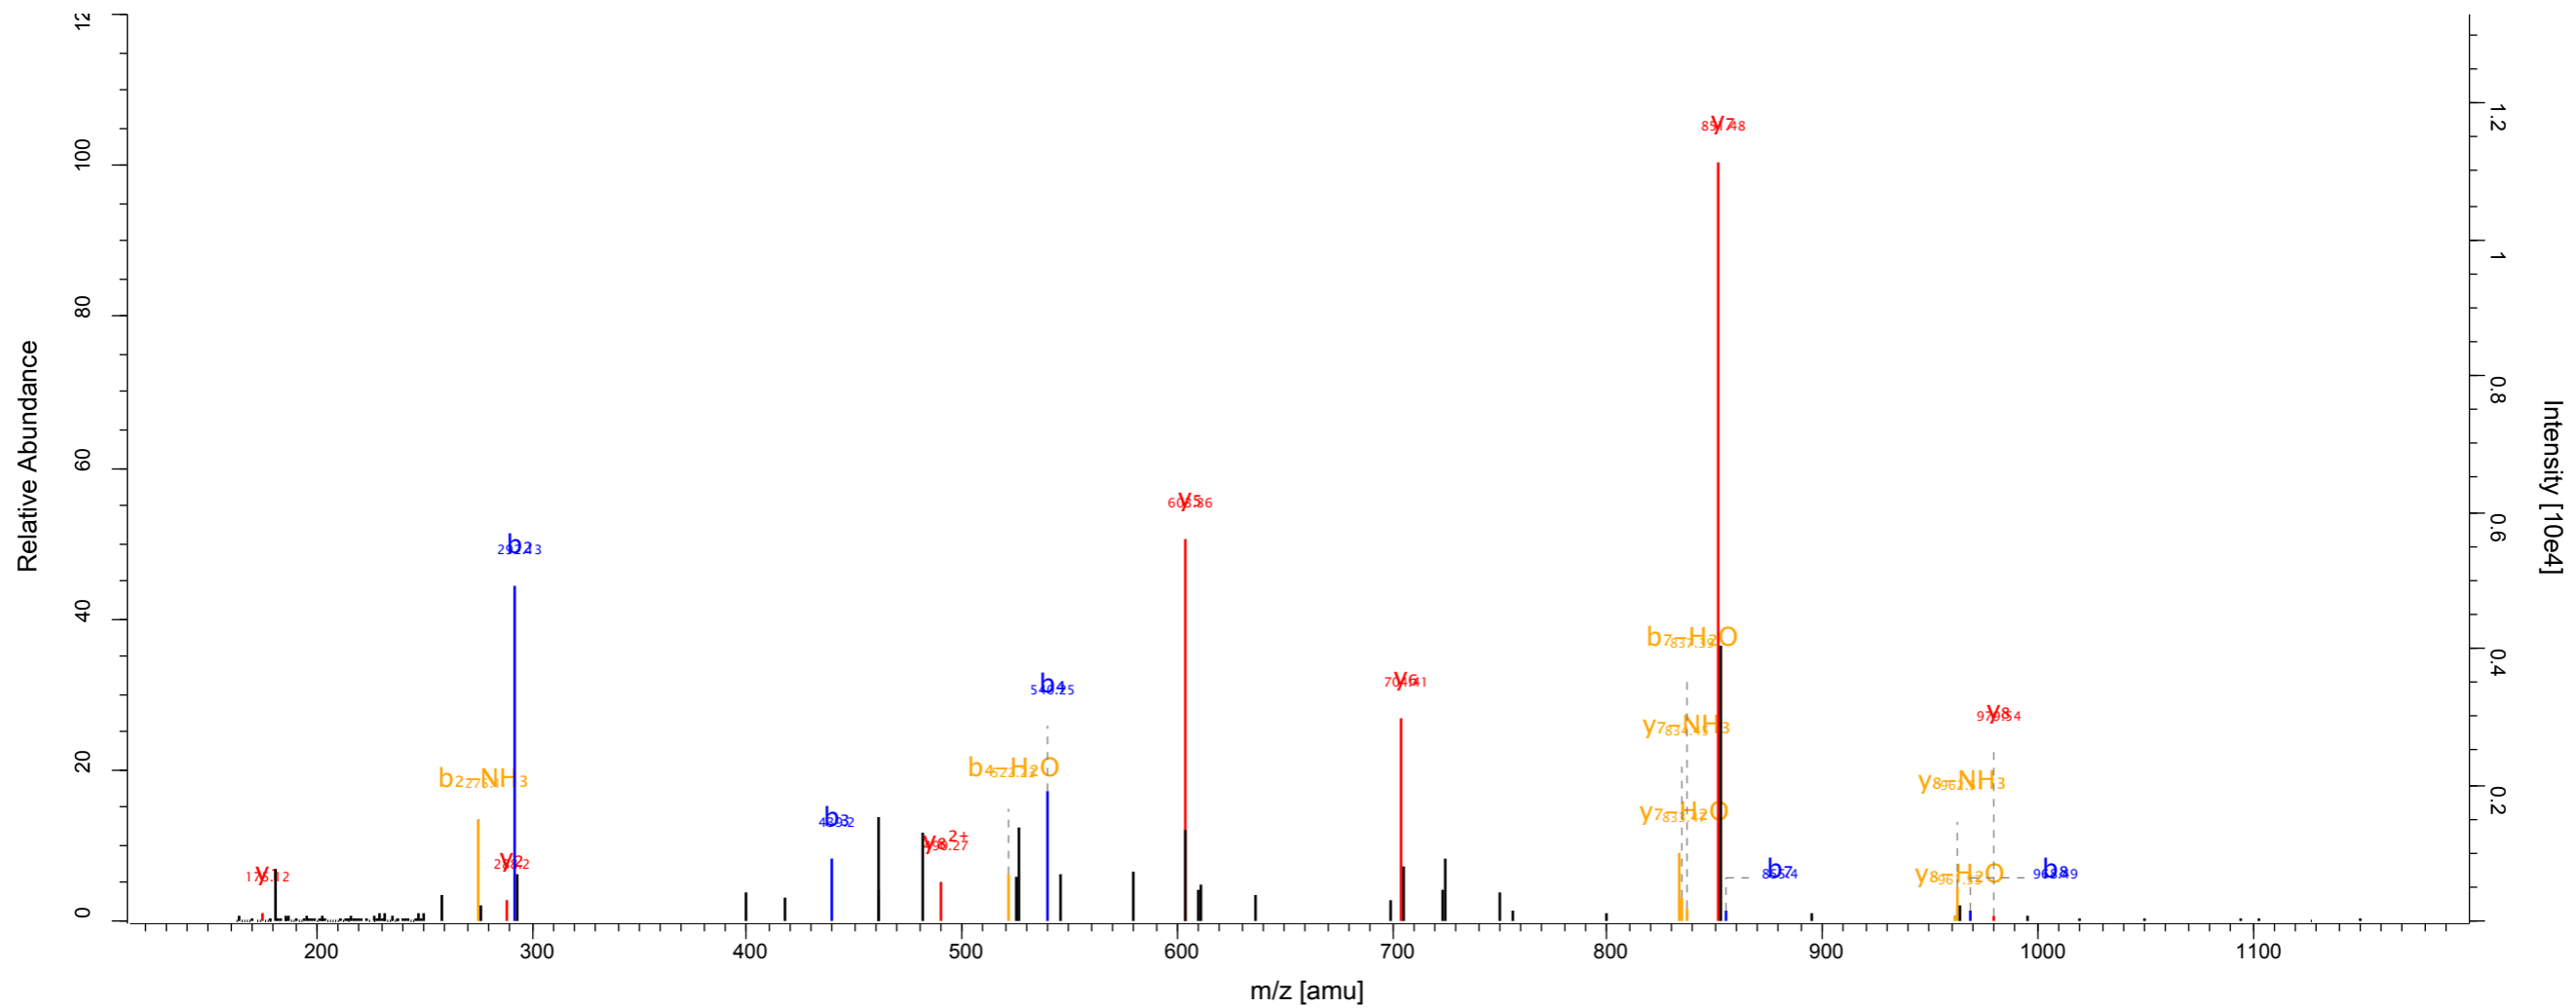

Scan number 3311 Raw file SKaraca\_LMB\_H1\_Forward\_041011\_18\_rep1  
 Method ITMS; CID Pepti... 231.06

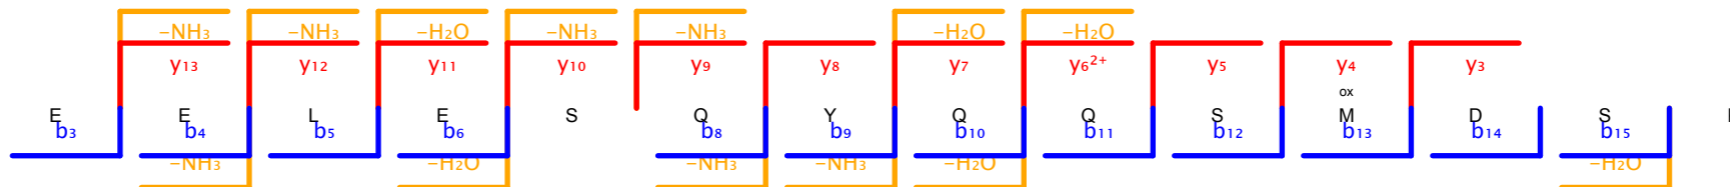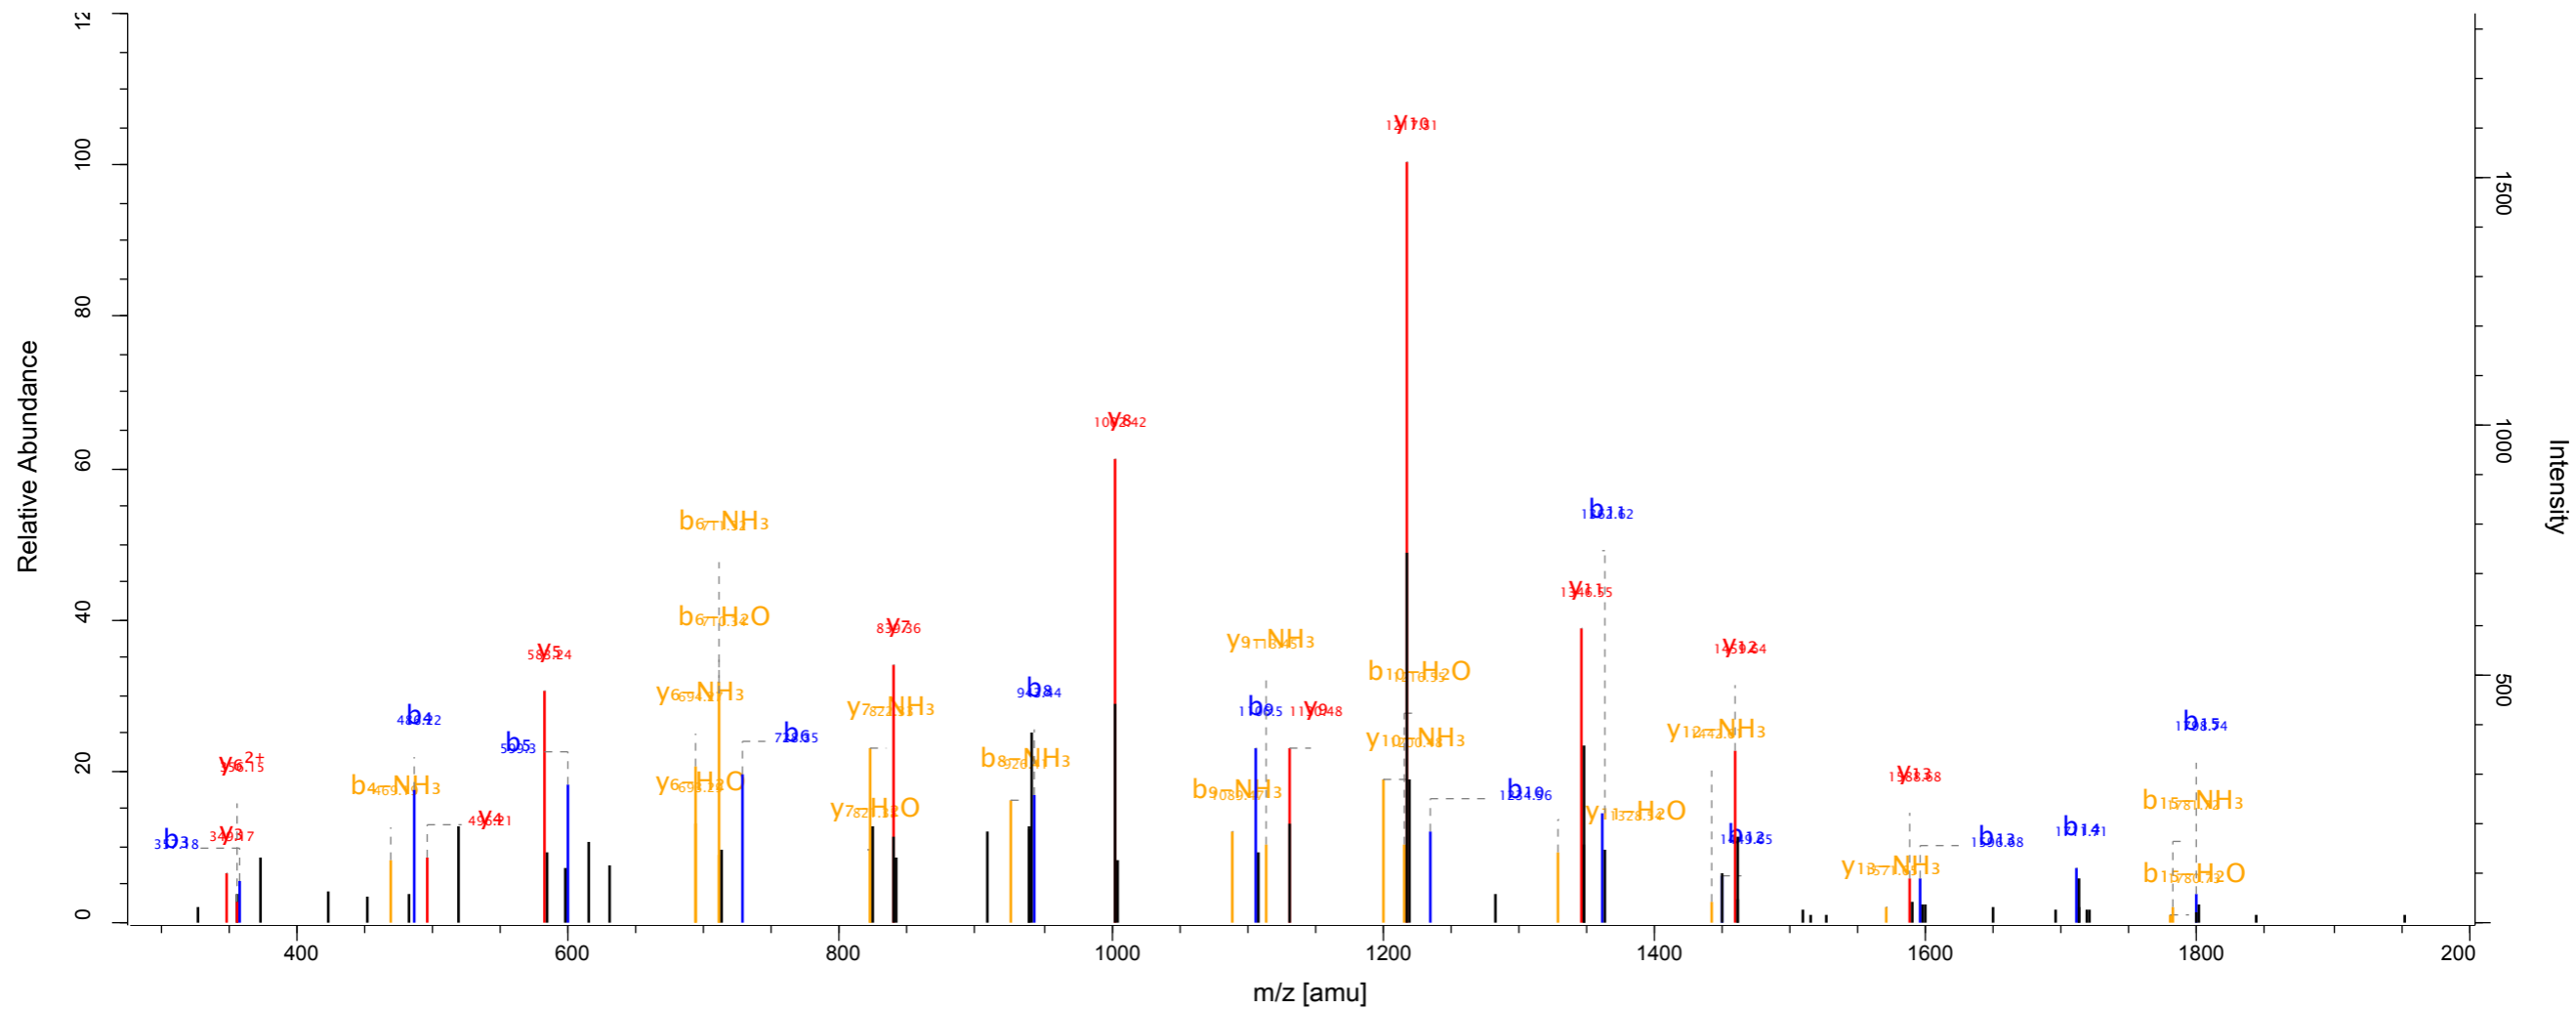

Scan number 8091 Raw file SKaraca\_LMB\_H1\_Forward\_041011\_18\_rep1  
 Method ITMS; CID Pepti... 123.19

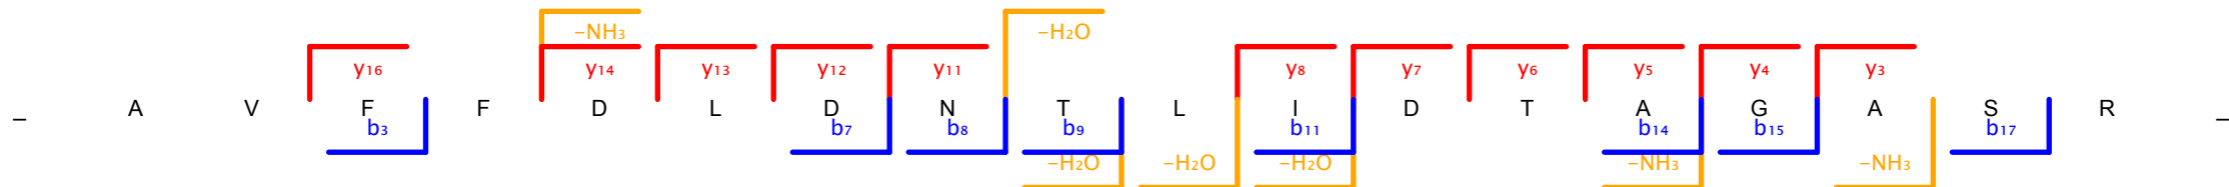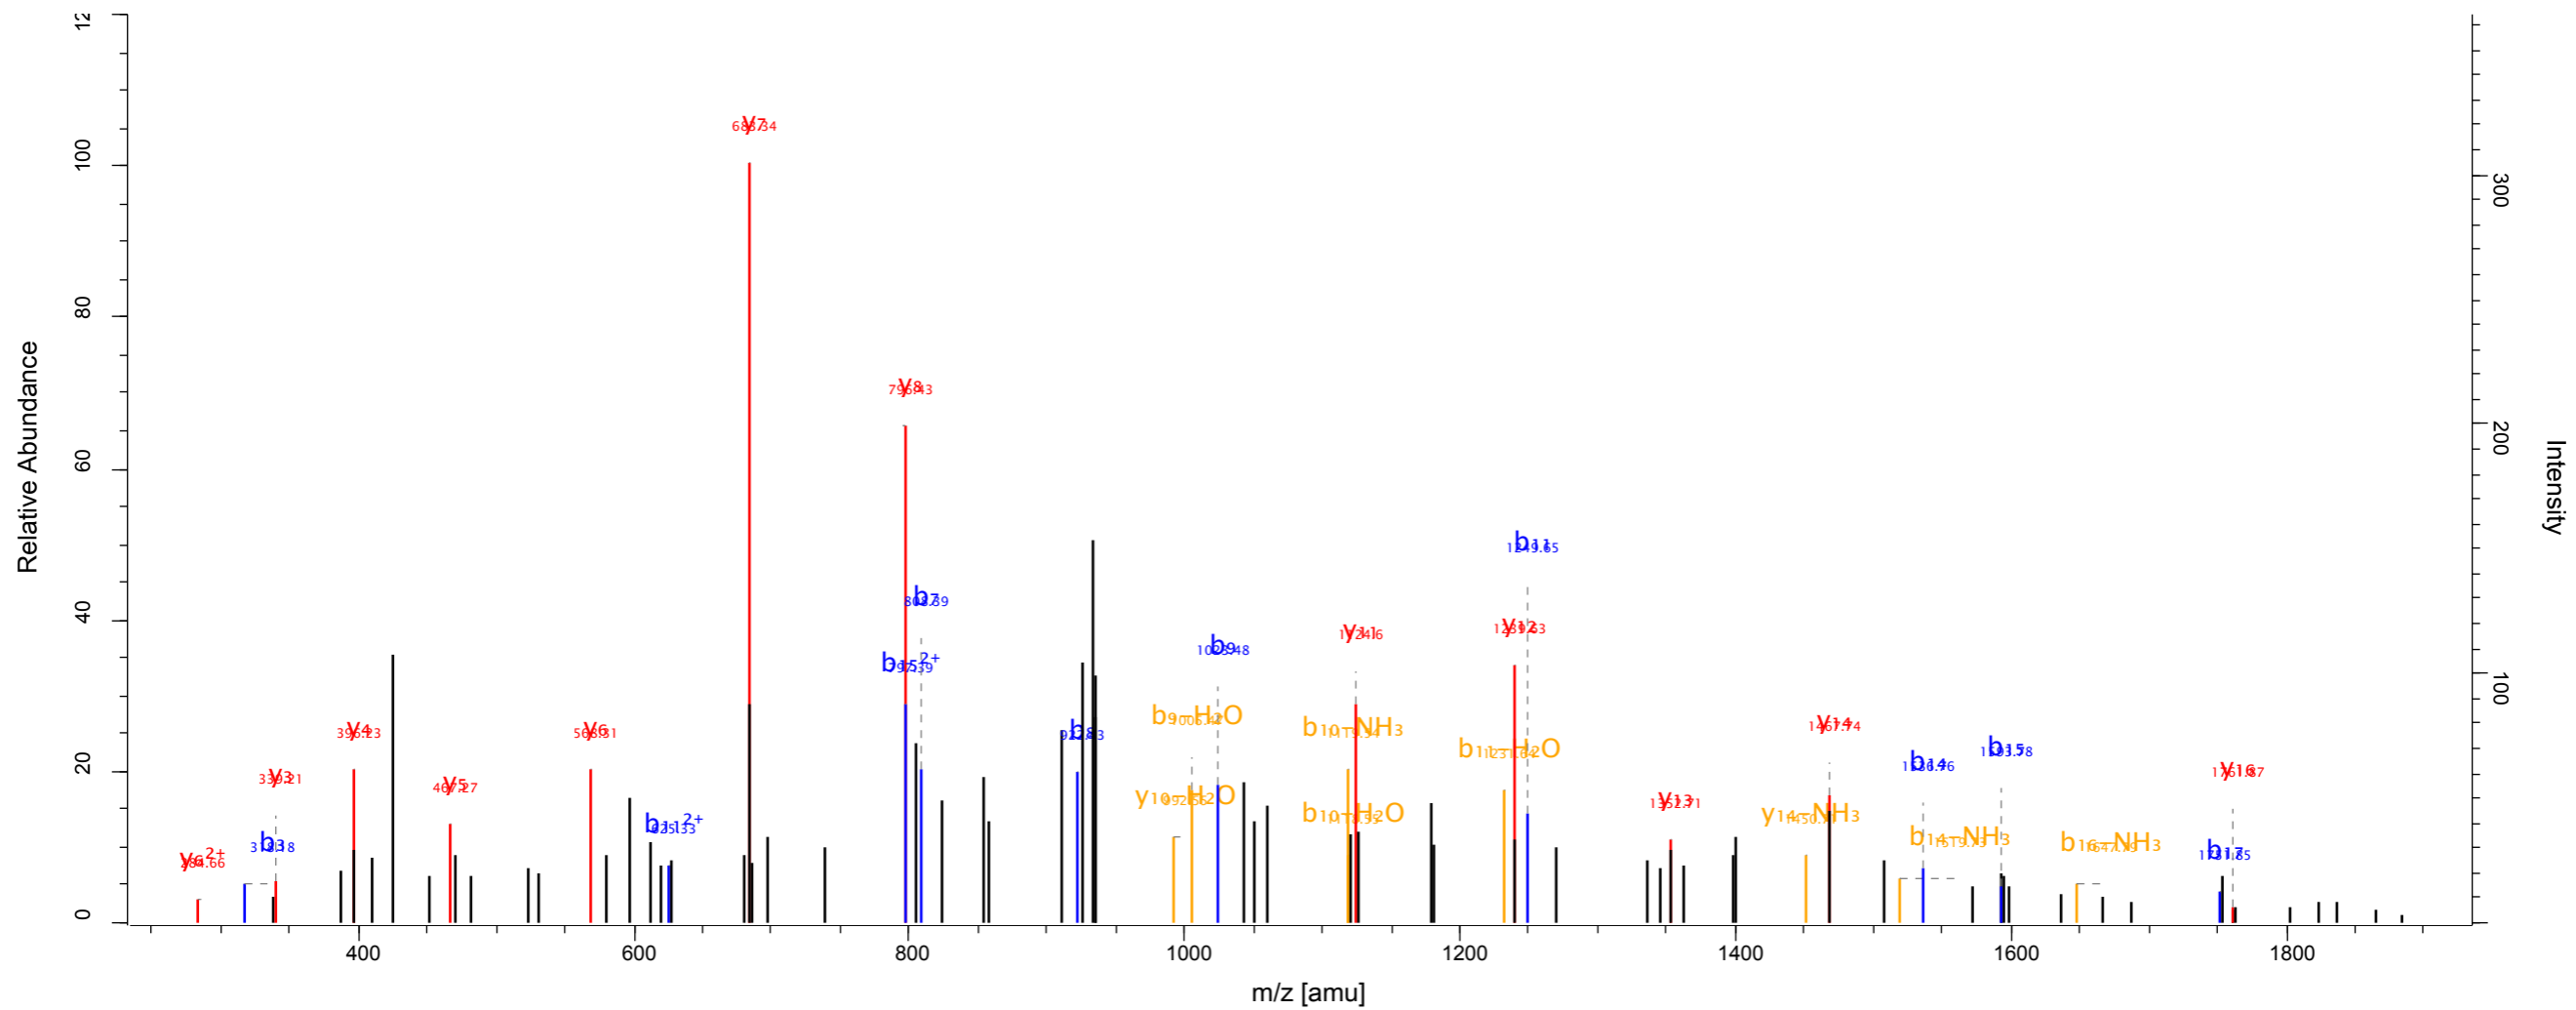

|             |           |          |                                       |
|-------------|-----------|----------|---------------------------------------|
| Scan number | 2590      | Raw file | SKaraca_LMB_H1_Forward_041011_19_rep1 |
| Method      | ITMS; CID | Pepti... | 101.54                                |

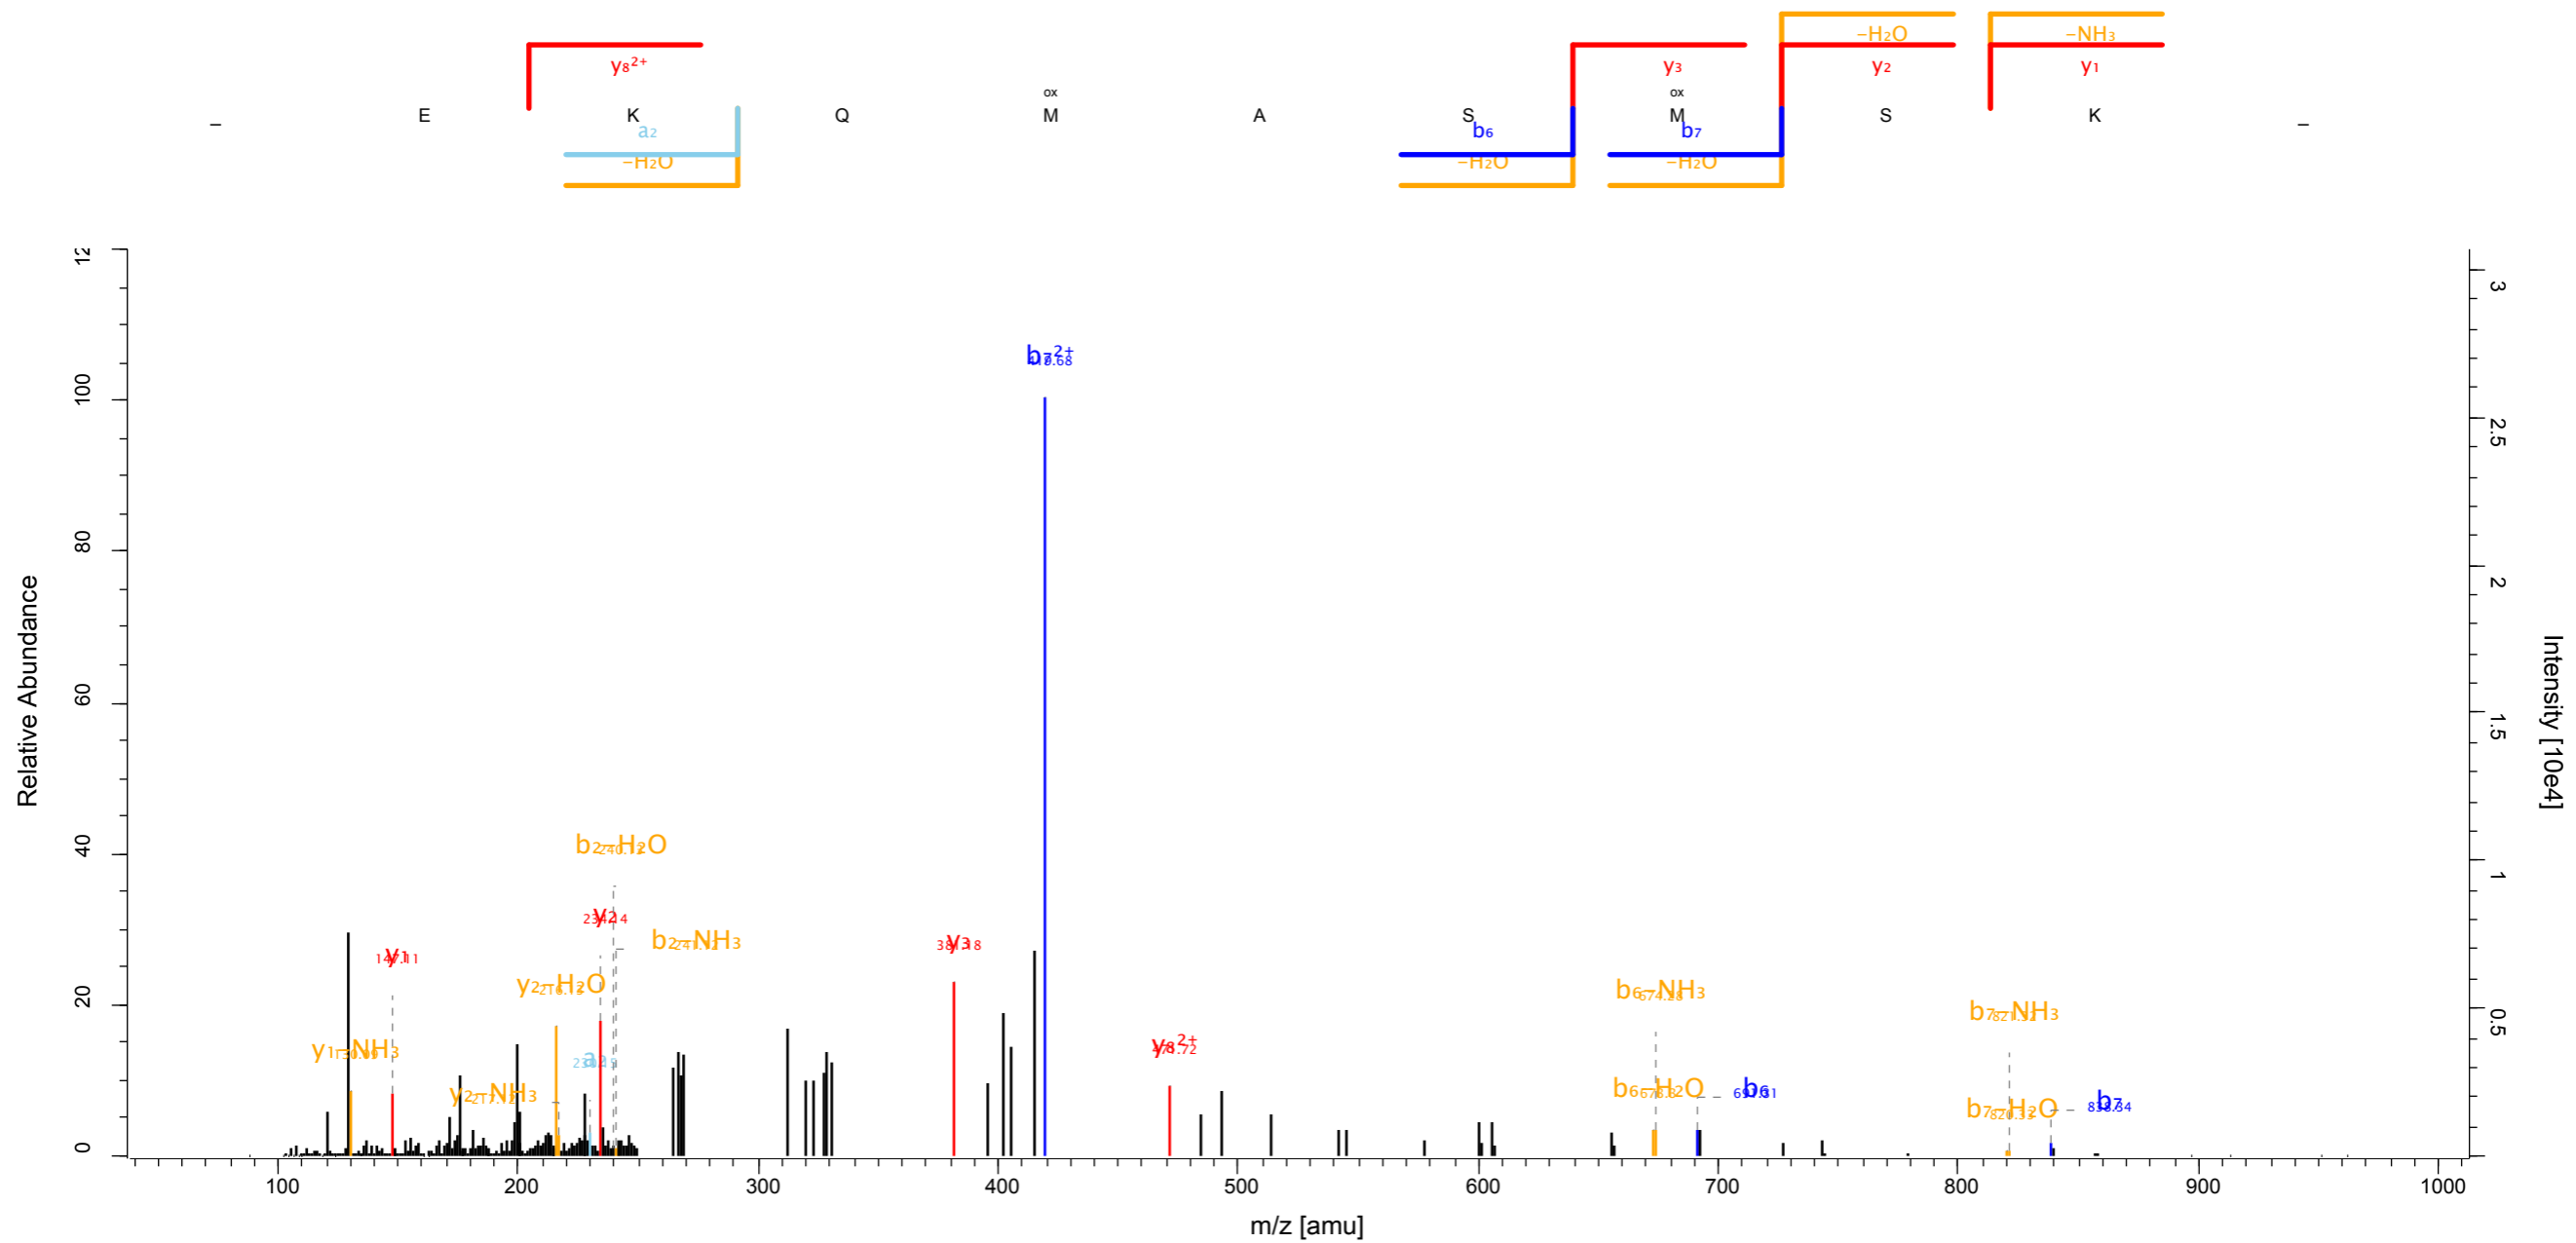

Scan number 7195 Raw file SKaraca\_LMB\_H1\_Forward\_041011\_19\_rep1  
 Method ITMS; CID Pepti... 136.63

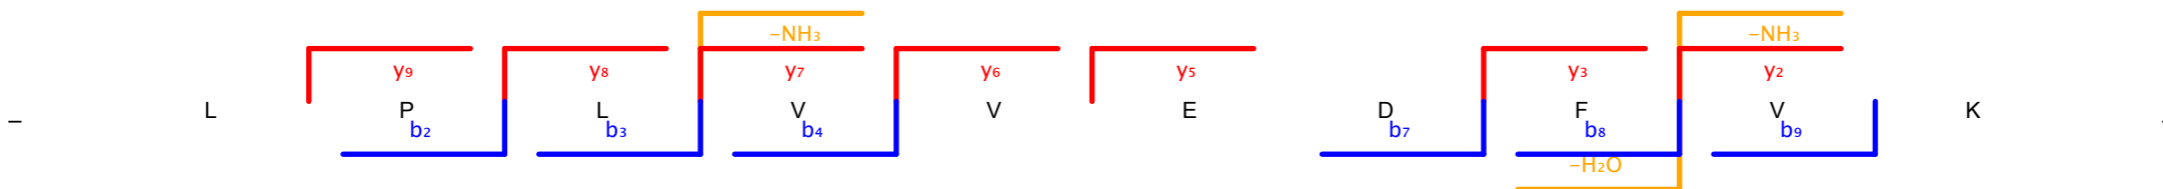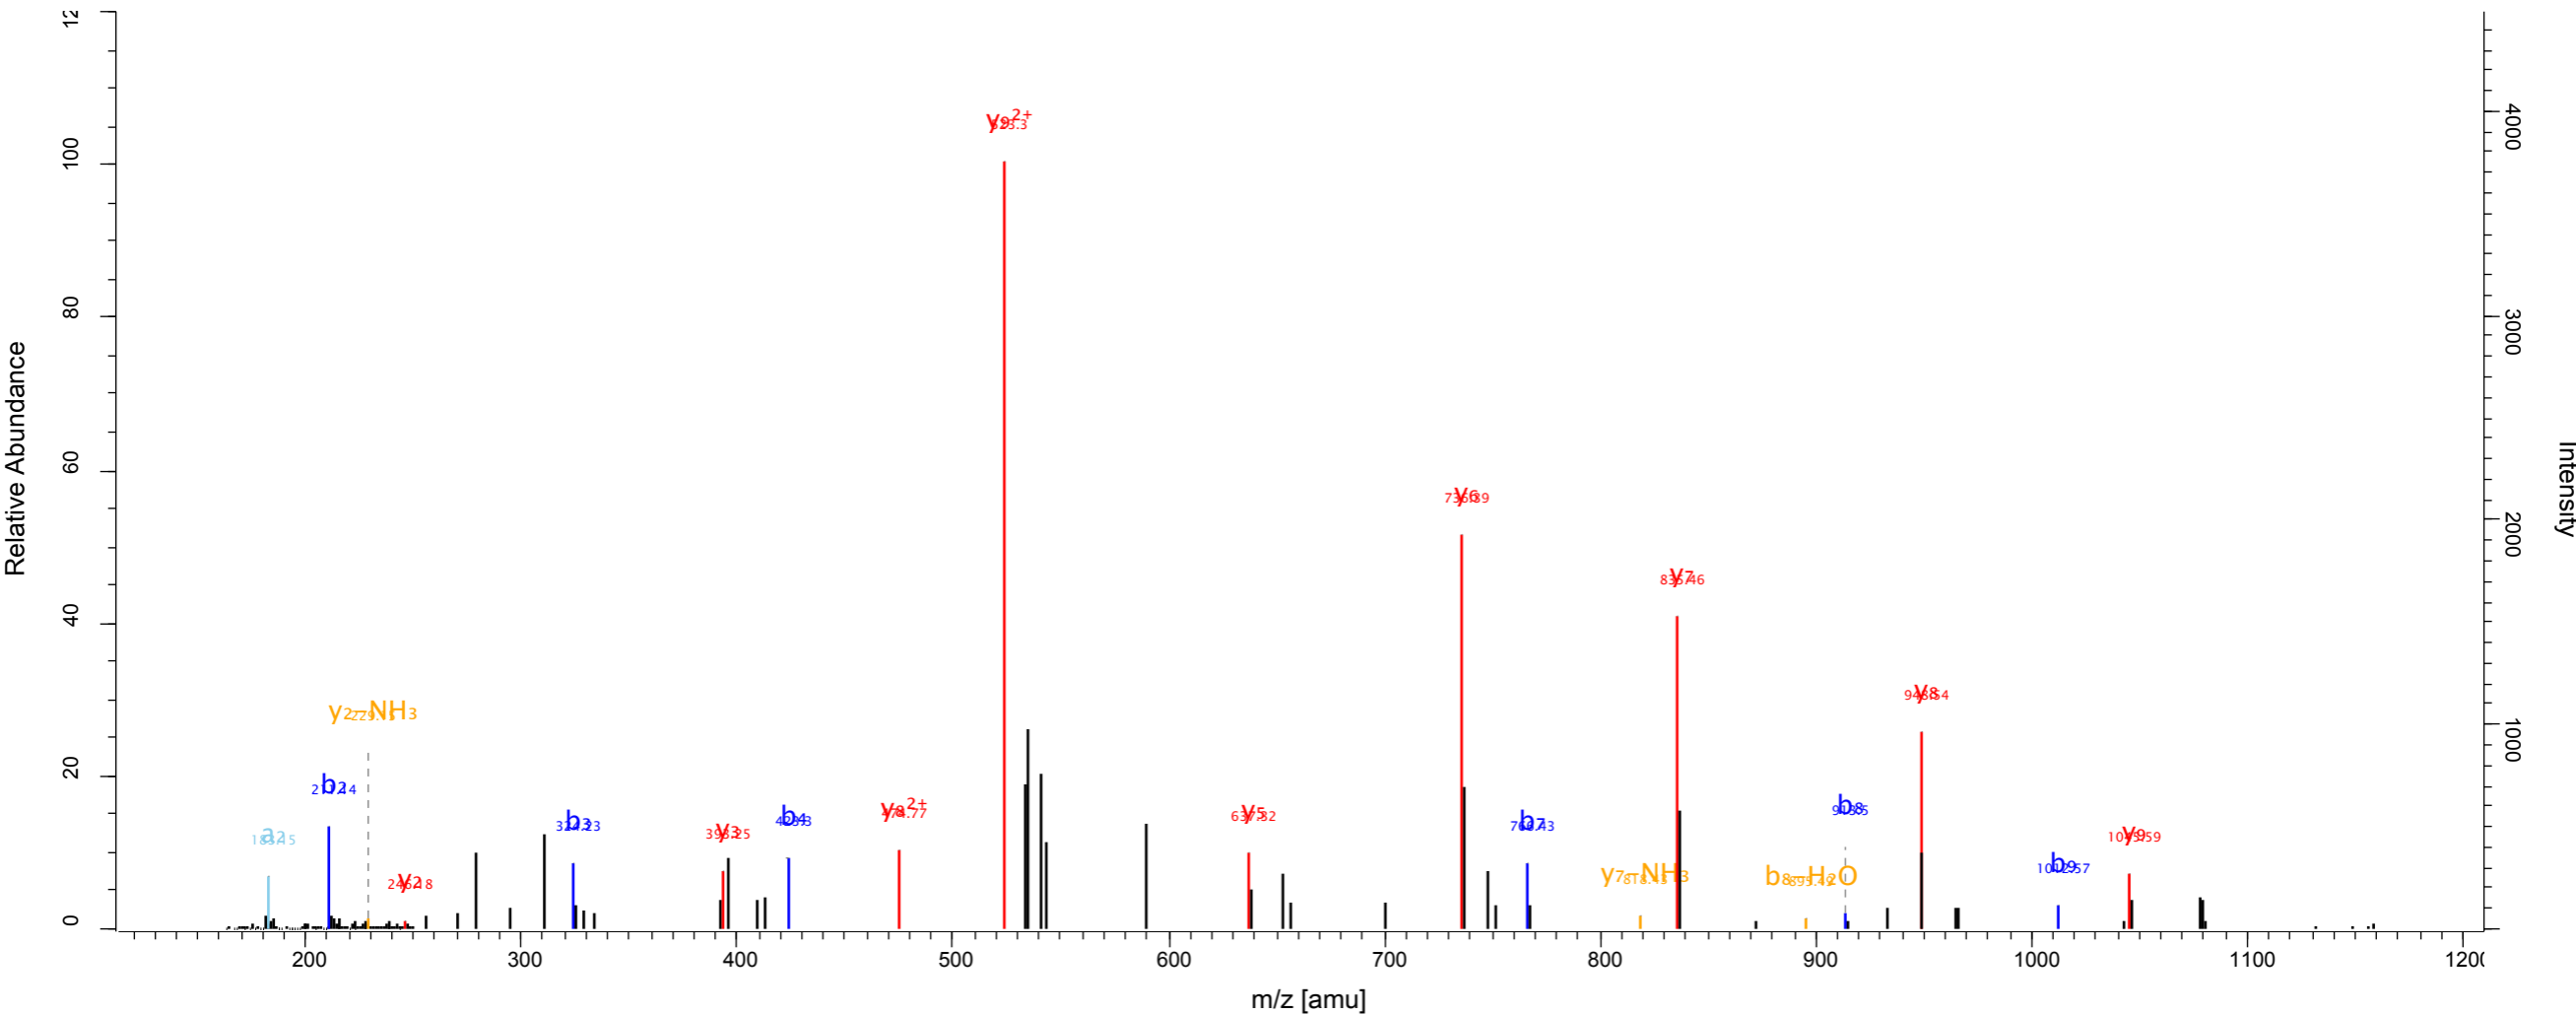



Scan number 7274 Raw file SKaraca\_LMB\_H1\_Forward\_041011\_19\_rep1  
 Method ITMS; CID Pepti... 275.42

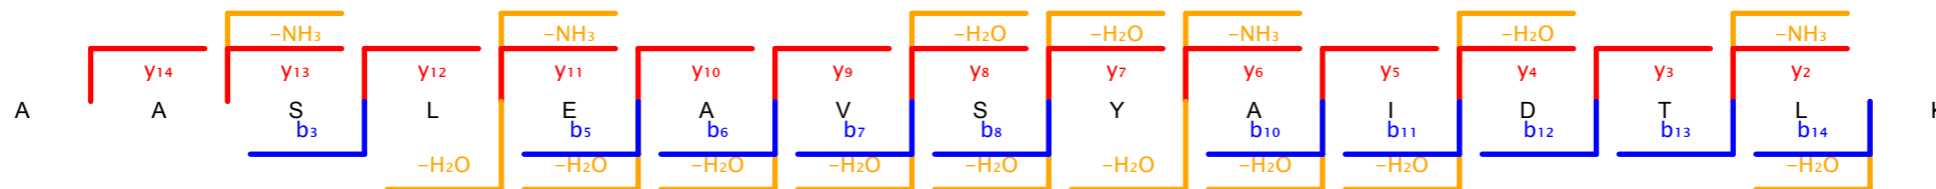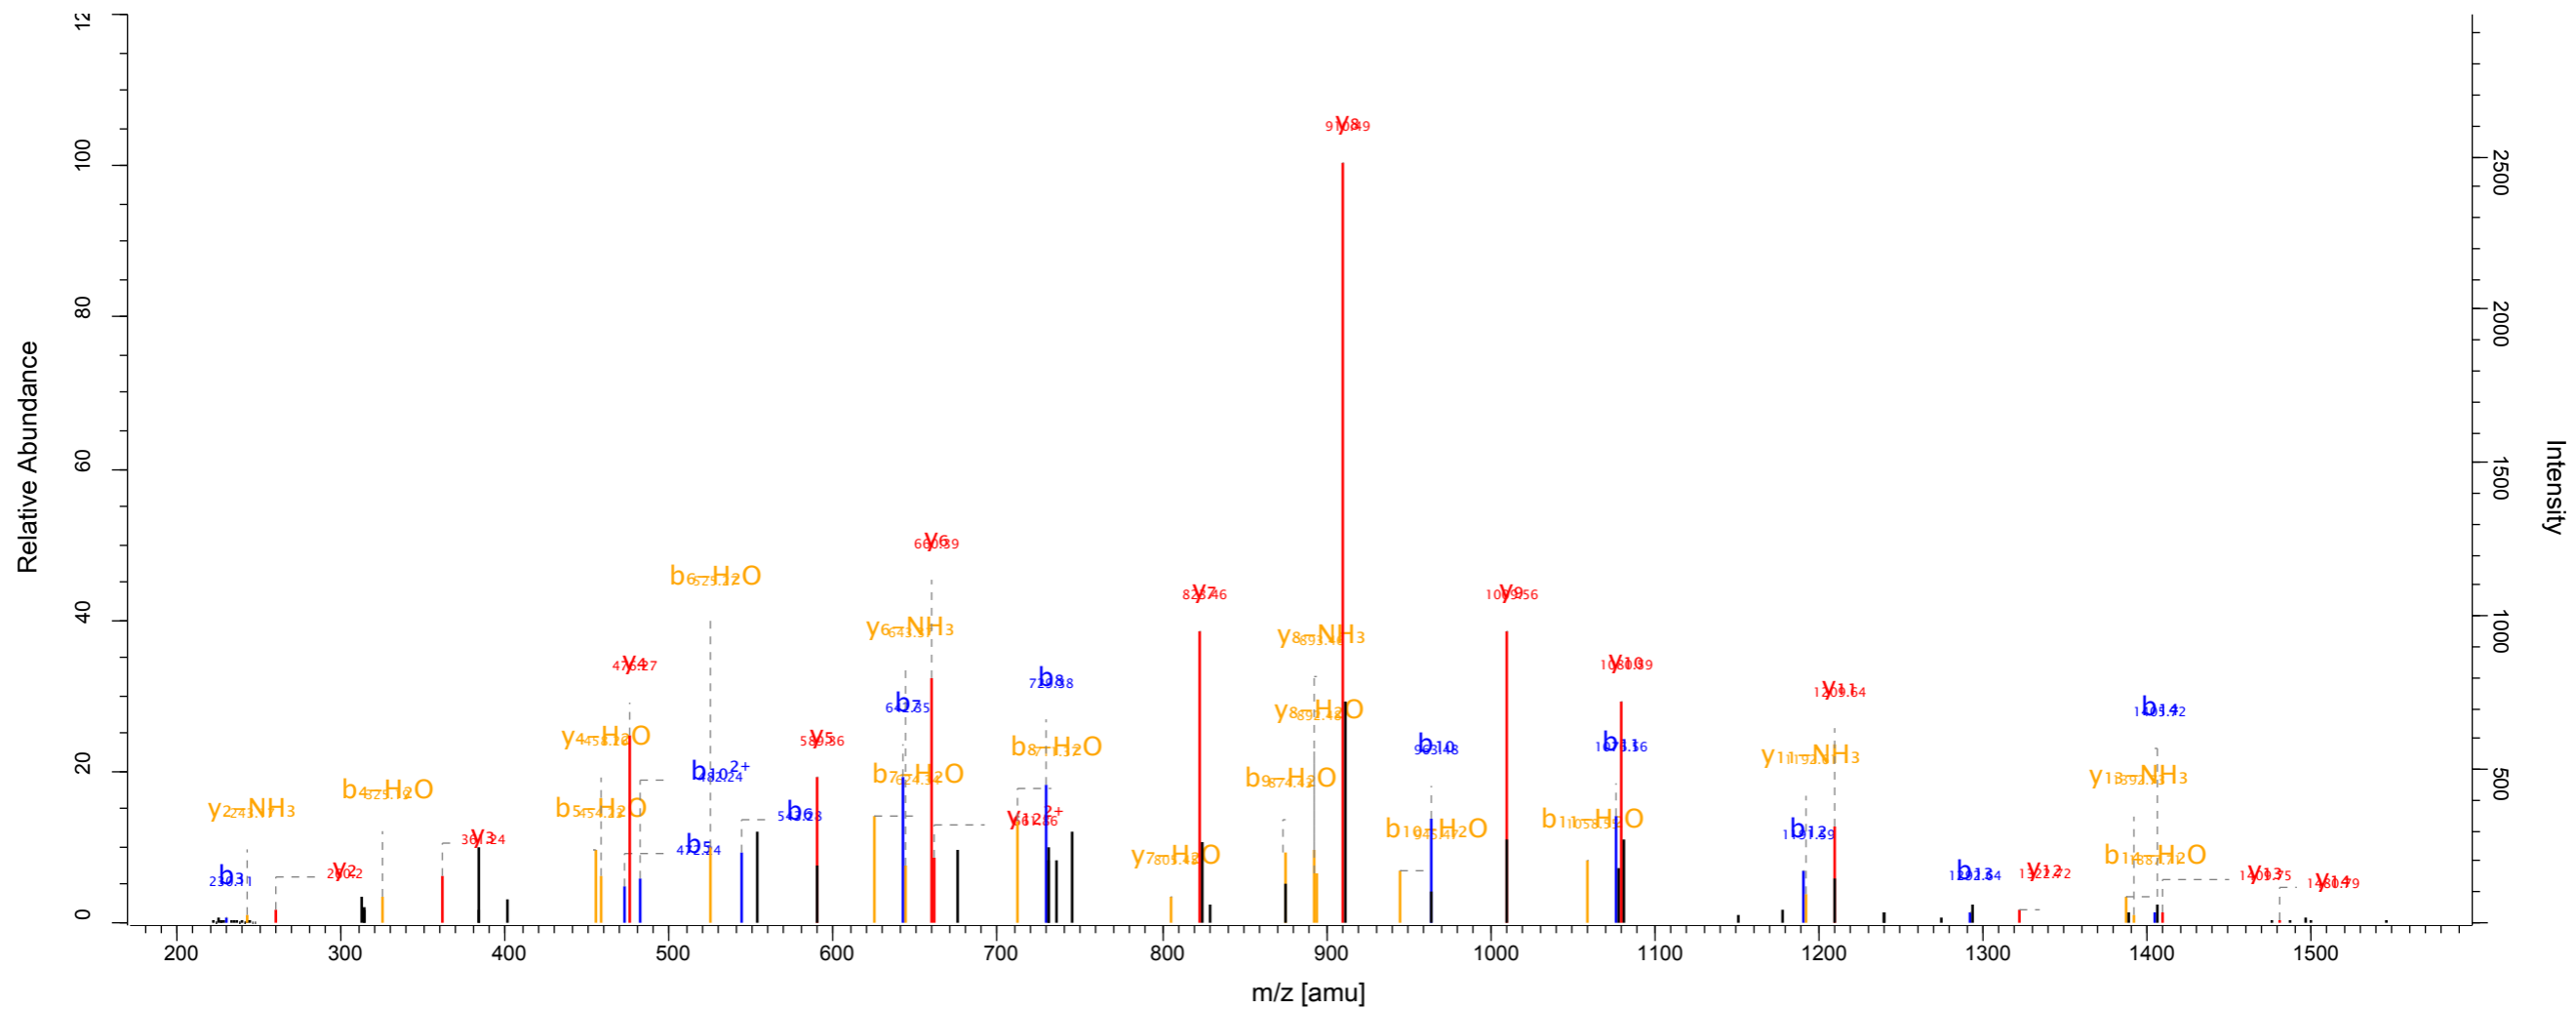

Scan number 7951 Raw file SKaraca\_LMB\_H1\_Forward\_041011\_19\_rep1  
 Method ITMS; CID Pepti... 132.79

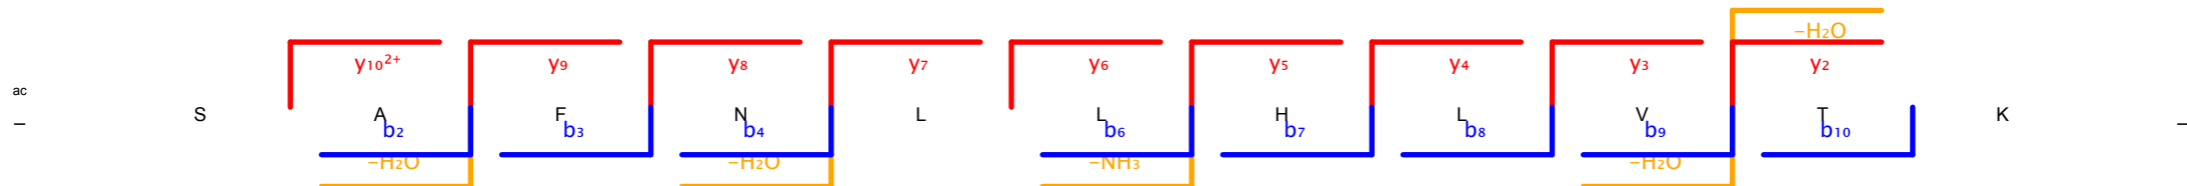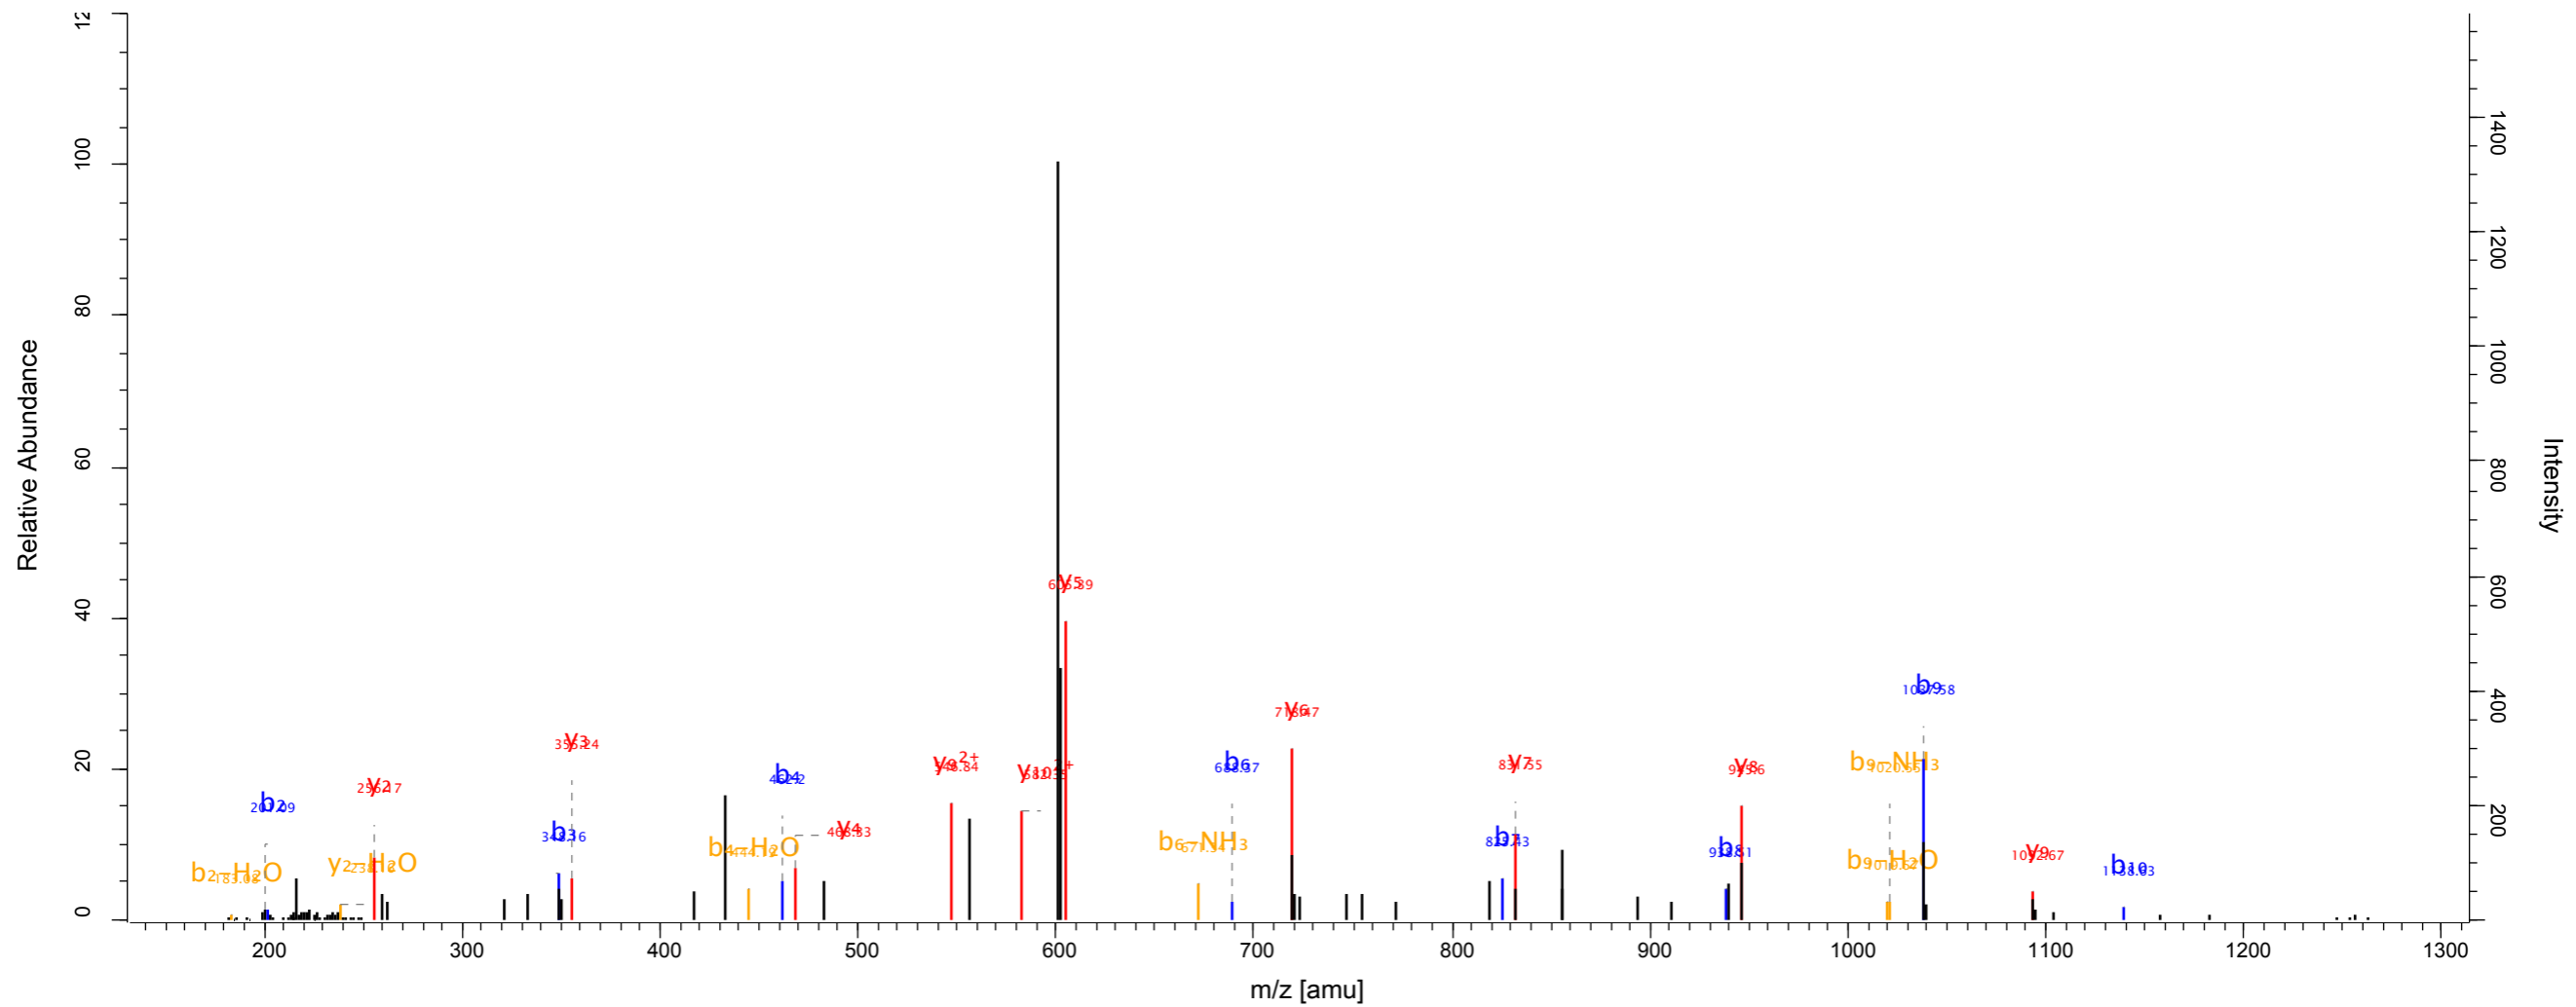

|             |           |          |                                       |
|-------------|-----------|----------|---------------------------------------|
| Scan number | 4842      | Raw file | SKaraca_LMB_H1_Forward_041011_19_rep2 |
| Method      | ITMS; CID | Pepti... | 143.03                                |

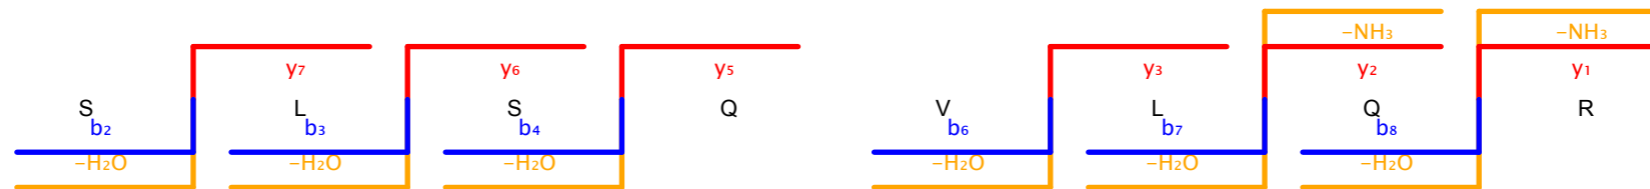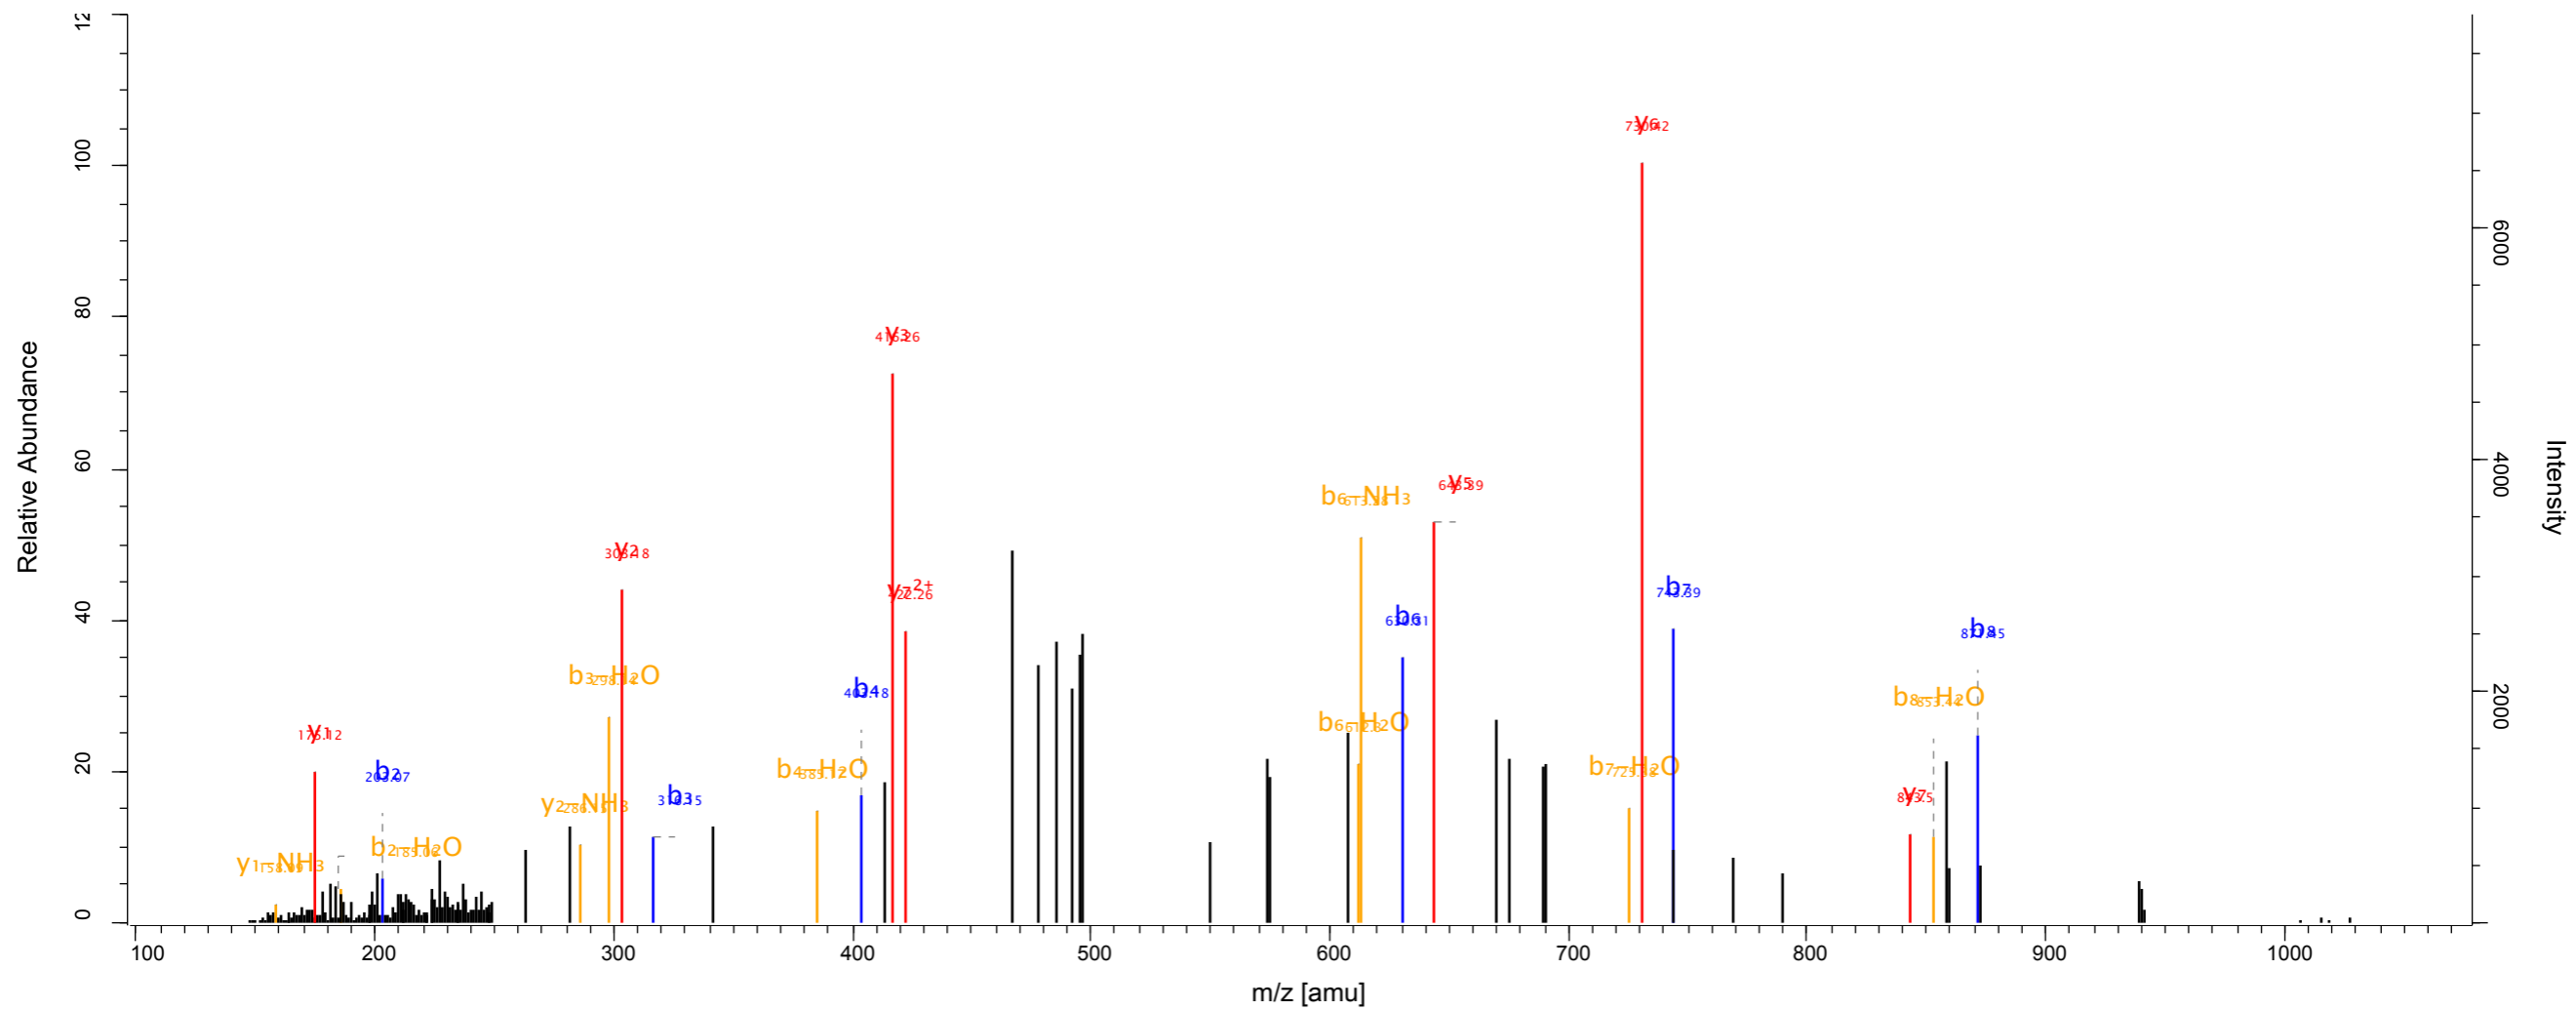

Scan number 7956 Raw file SKaraca\_LMB\_H1\_Forward\_041011\_19\_rep2  
 Method ITMS; CID Pepti... 195.2

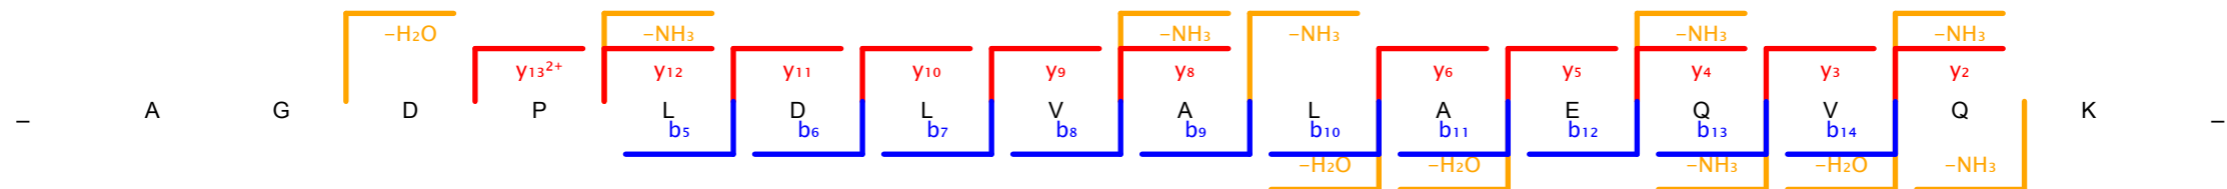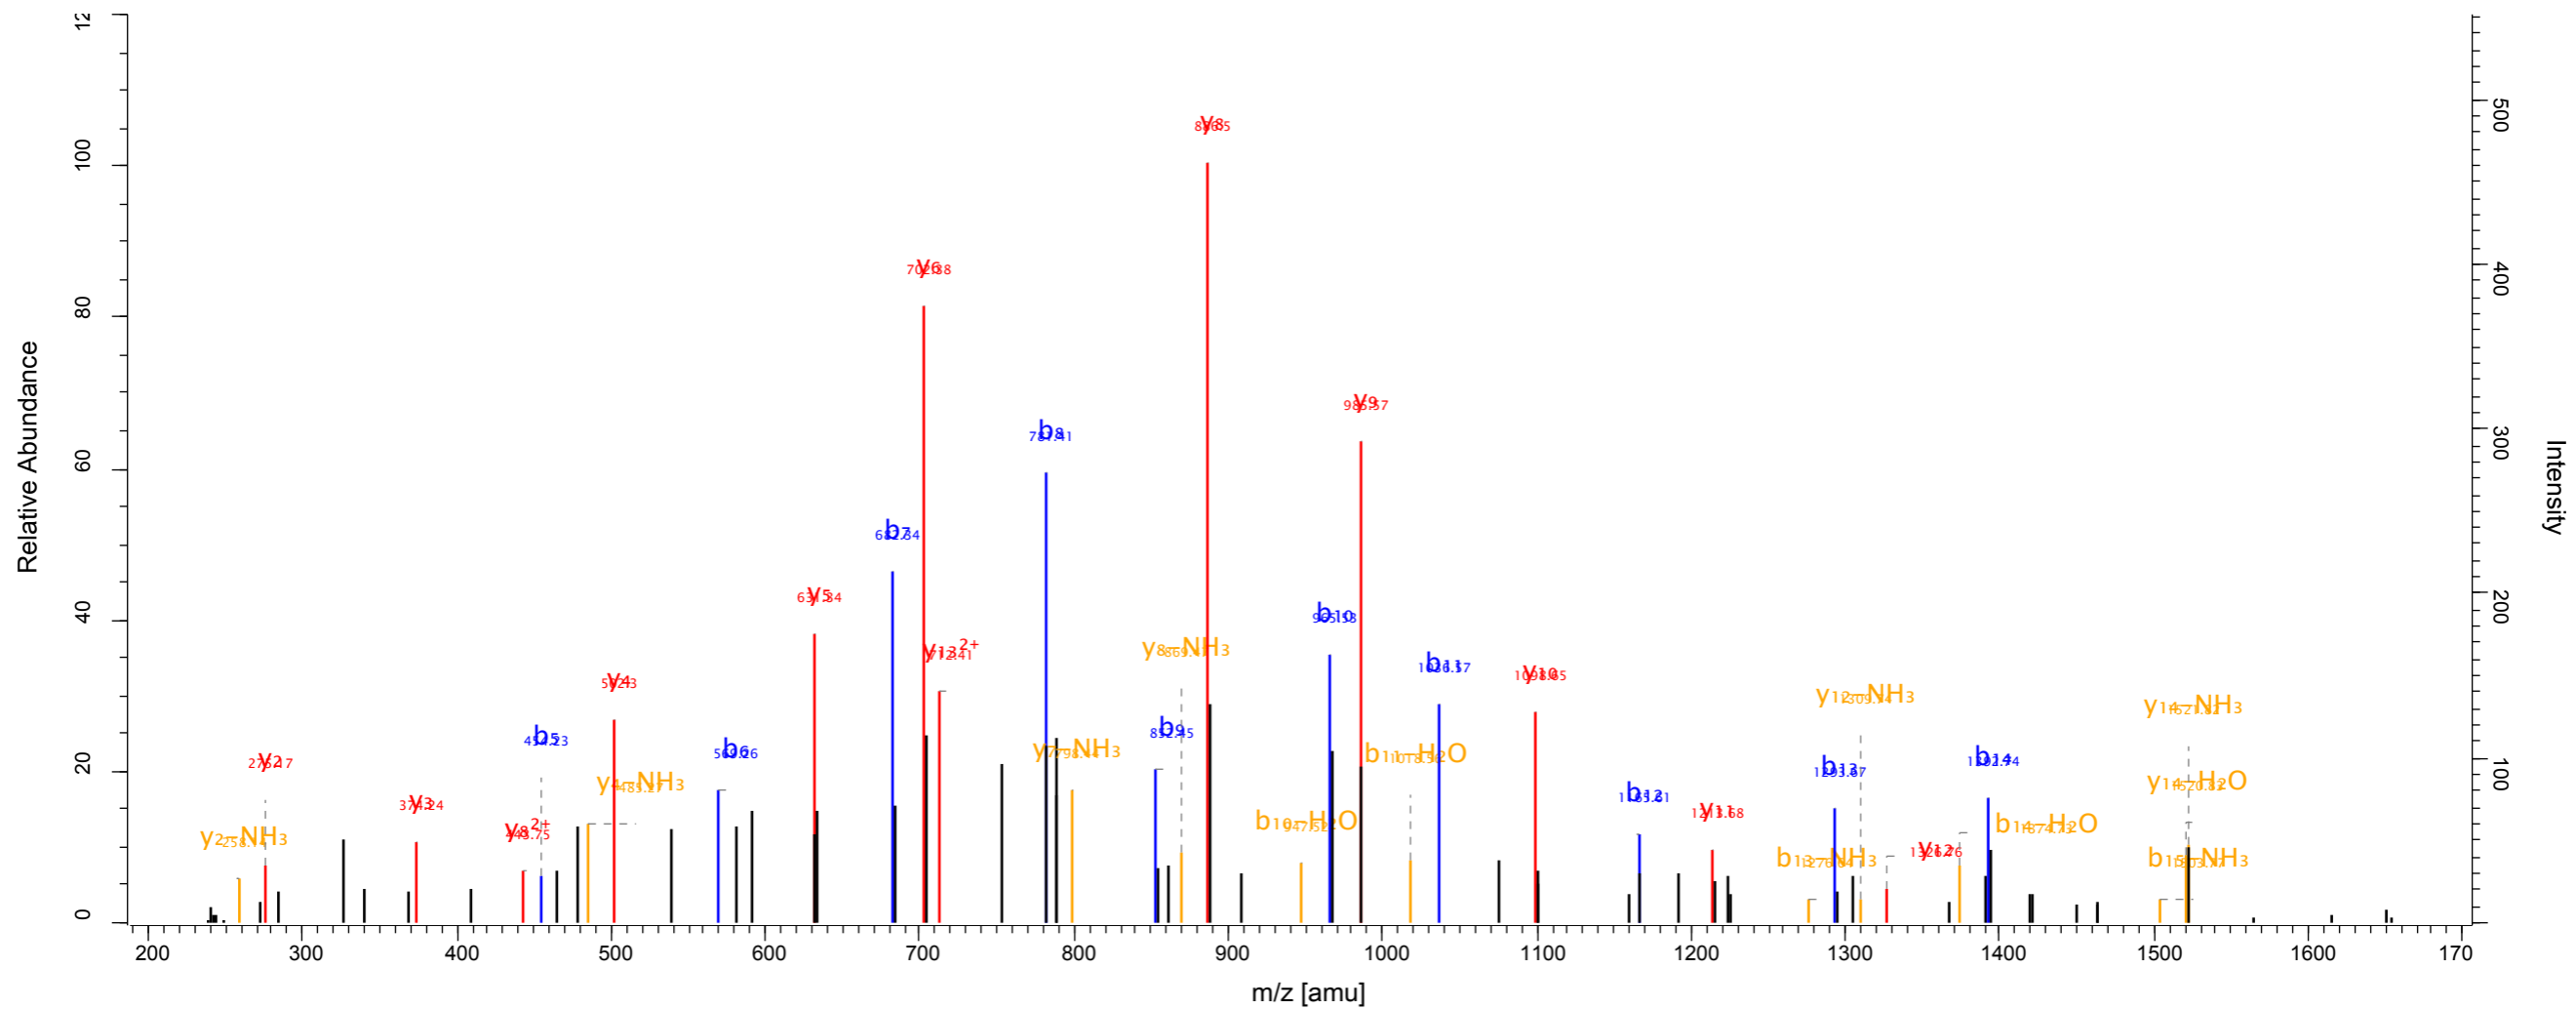

Scan number 4557 Raw file SKaraca\_LMB\_H1\_Forward\_041011\_21\_rep1  
 Method ITMS; CID Pepti... 129.7

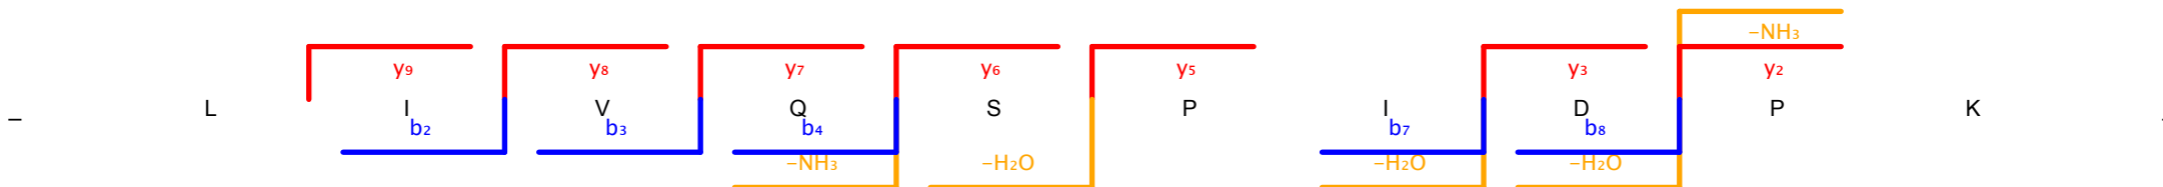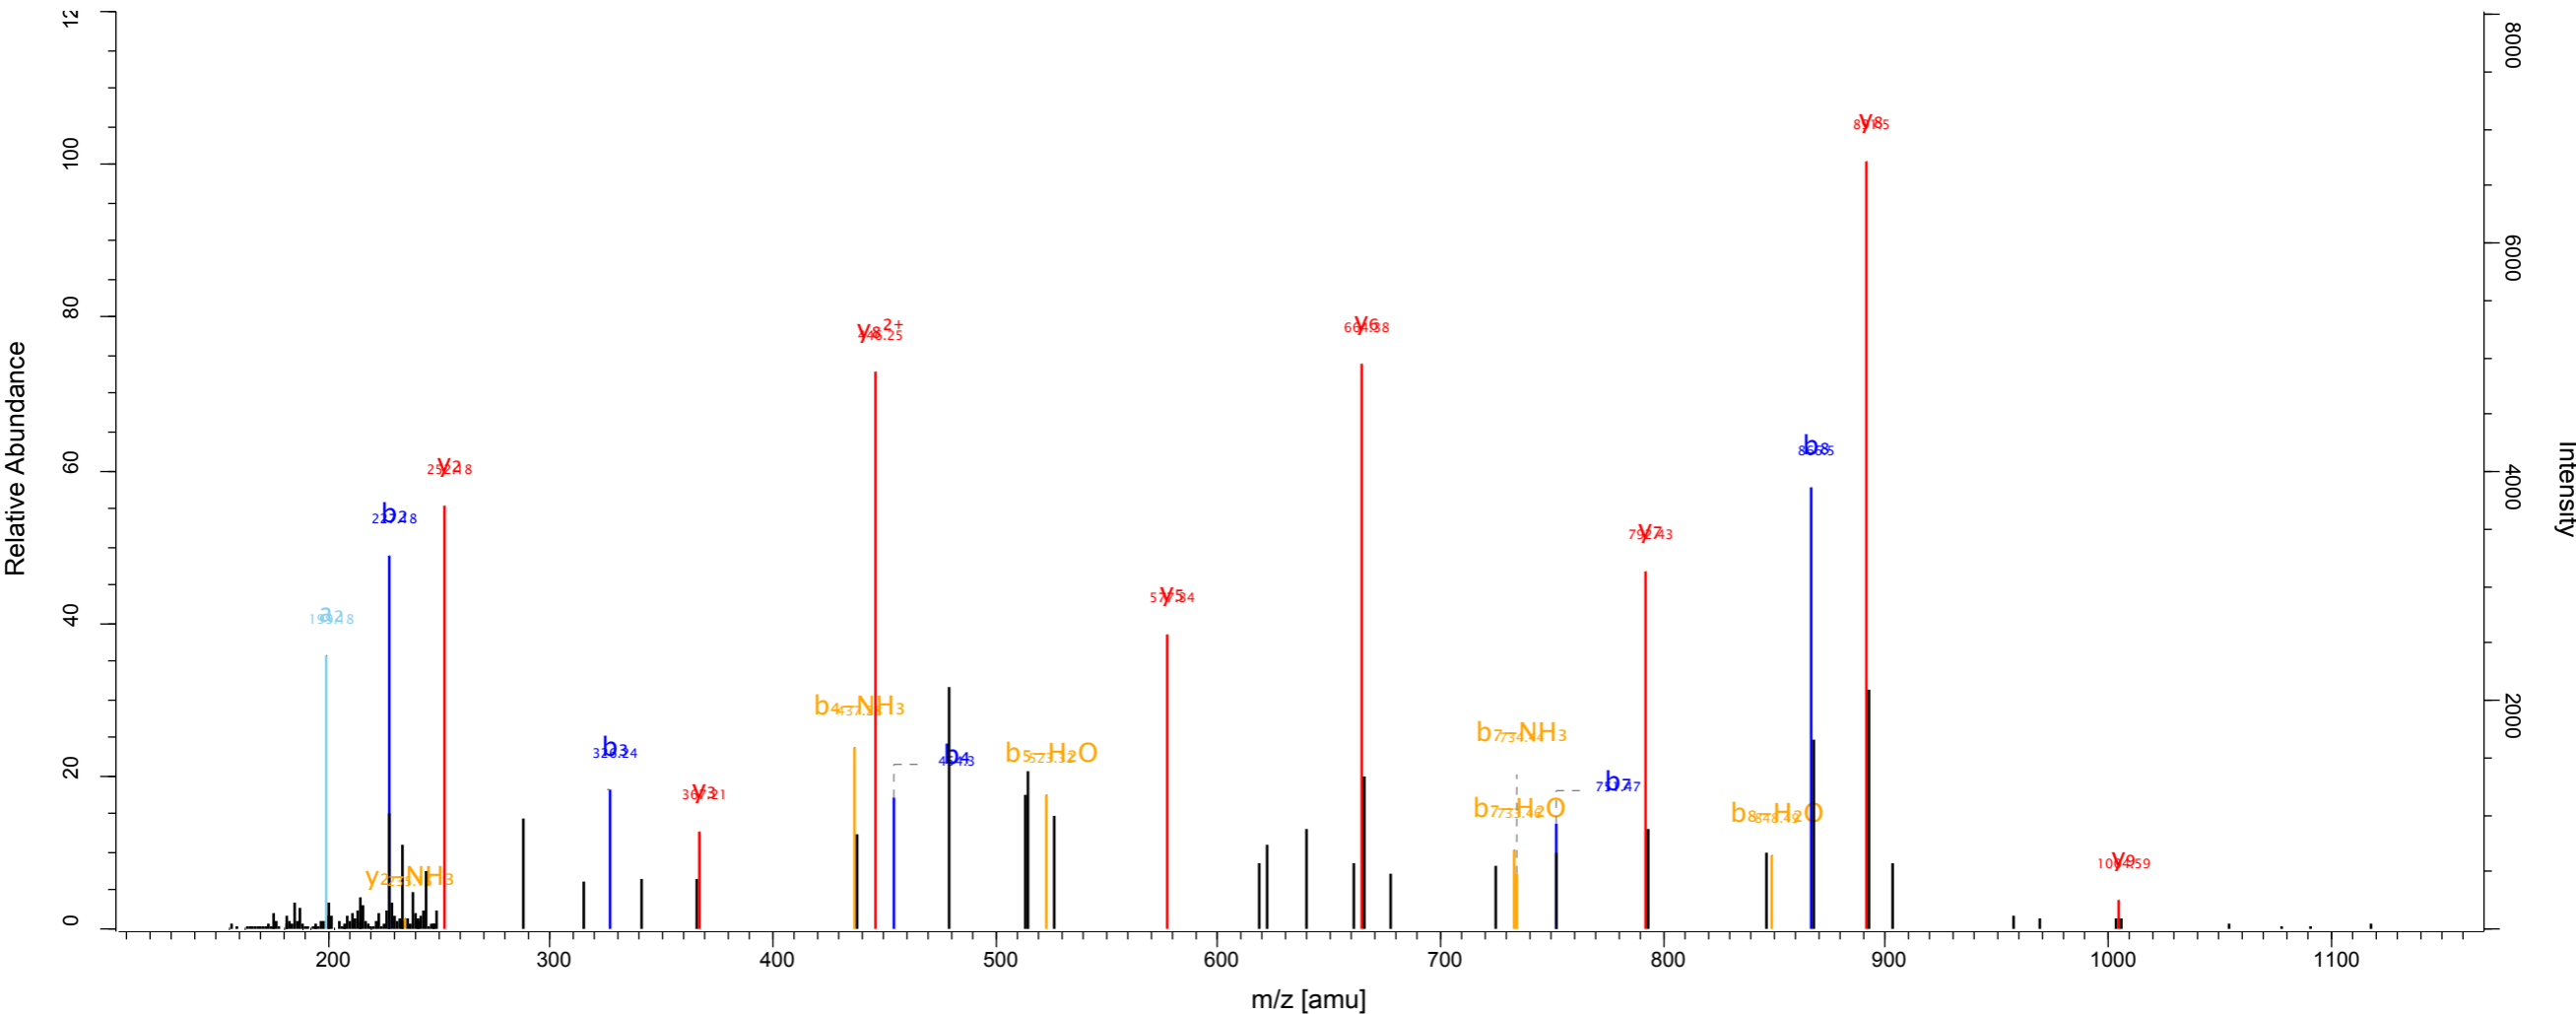

Scan number 6597 Raw file SKaraca\_LMB\_H1\_Forward\_041011\_21\_rep2  
Method ITMS; CID Pepti... 93.91

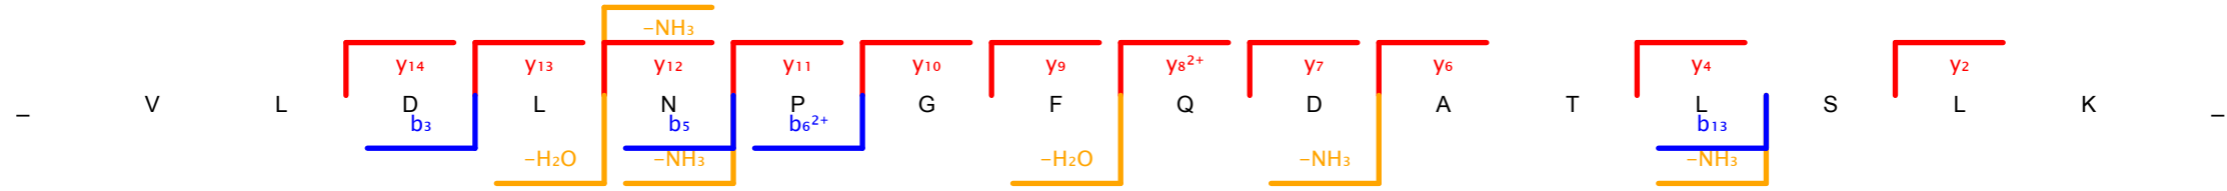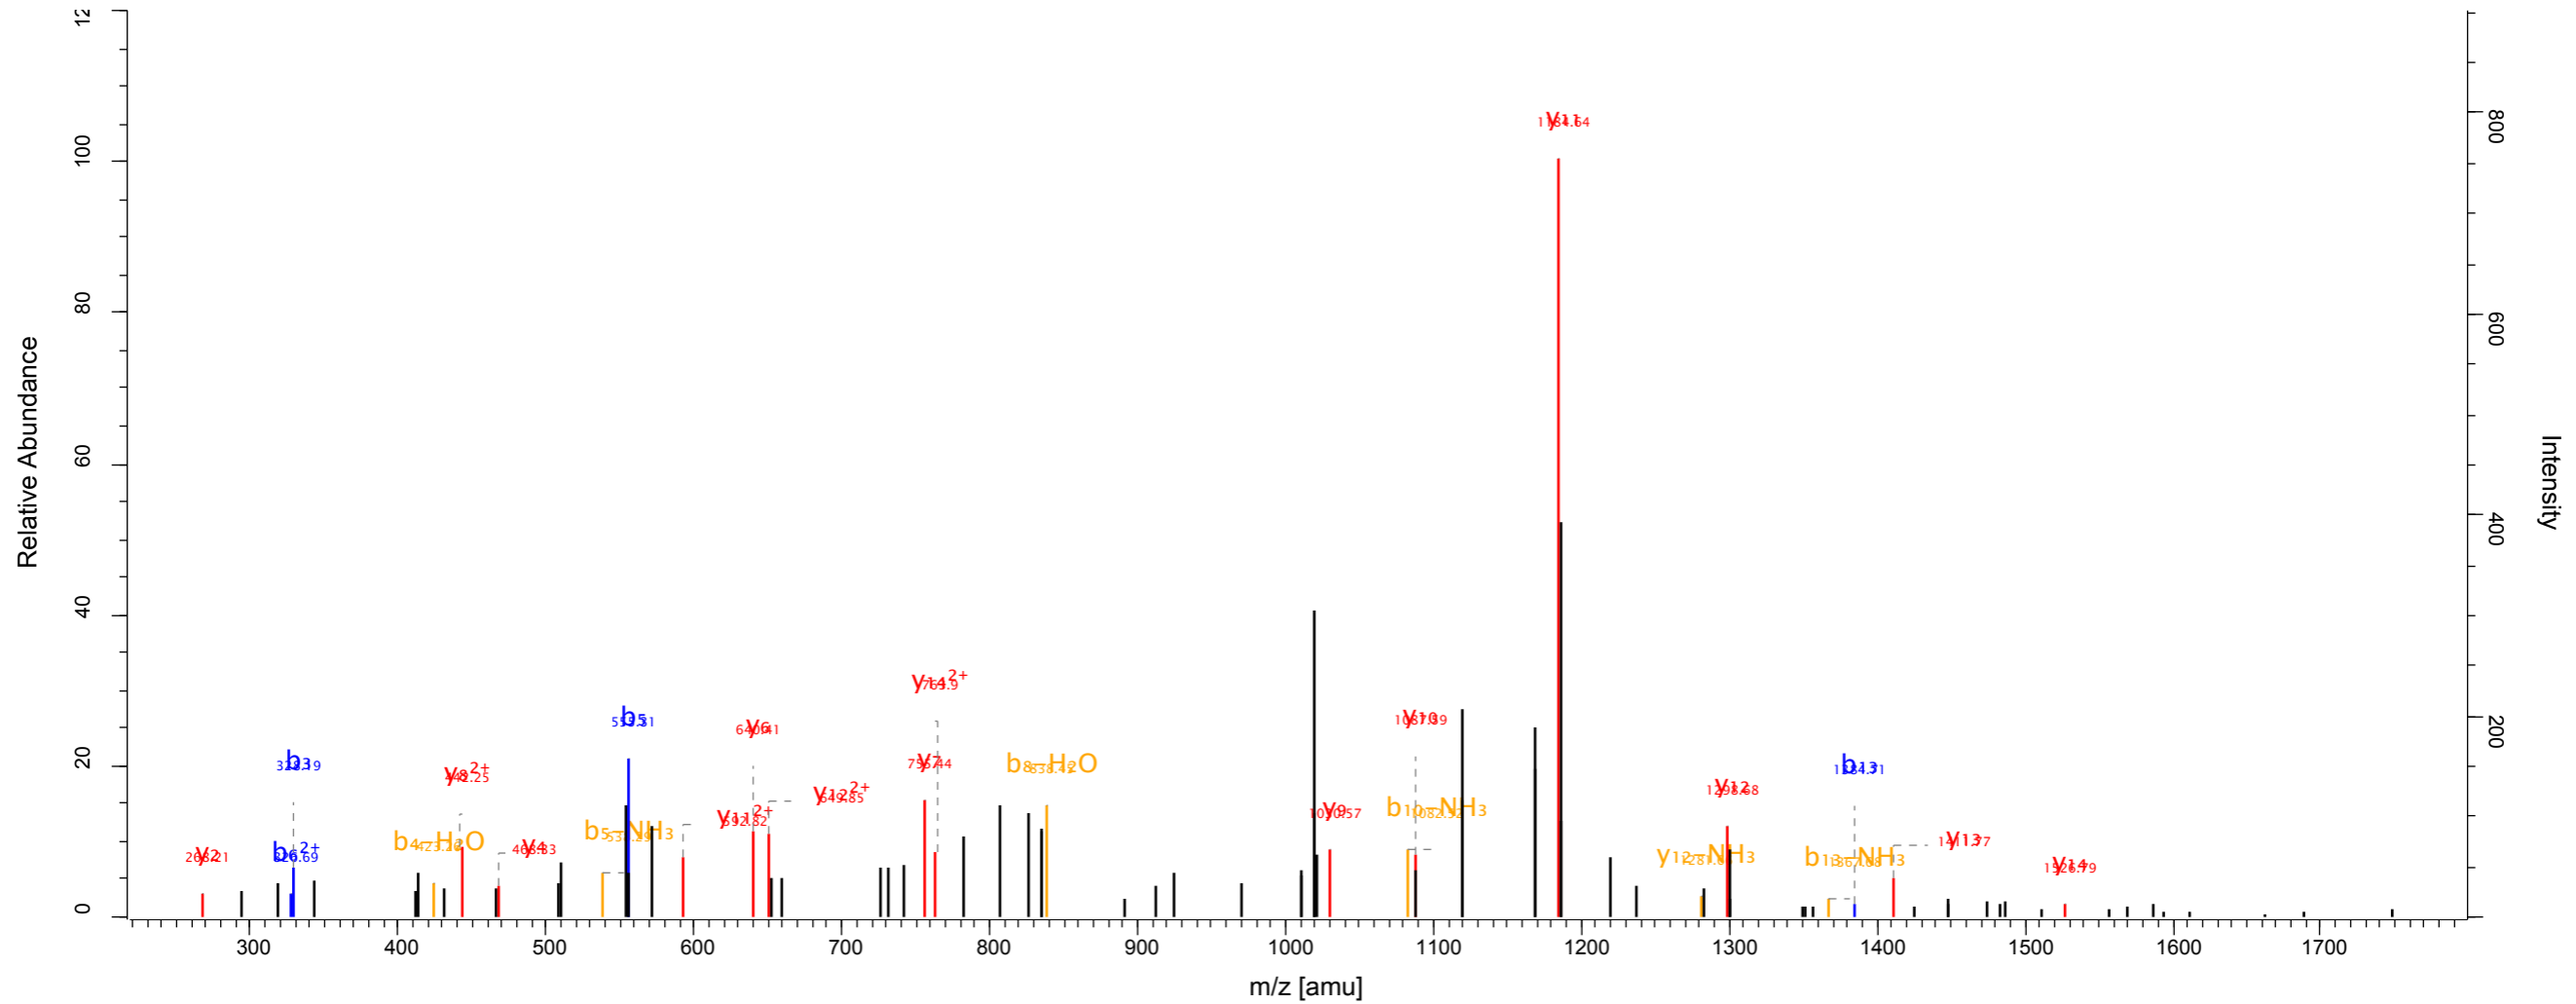

Scan number 2840 Raw file SKaraca\_LMB\_H1\_Forward\_041011\_22\_rep2  
 Method ITMS; CID Pepti... 168.76

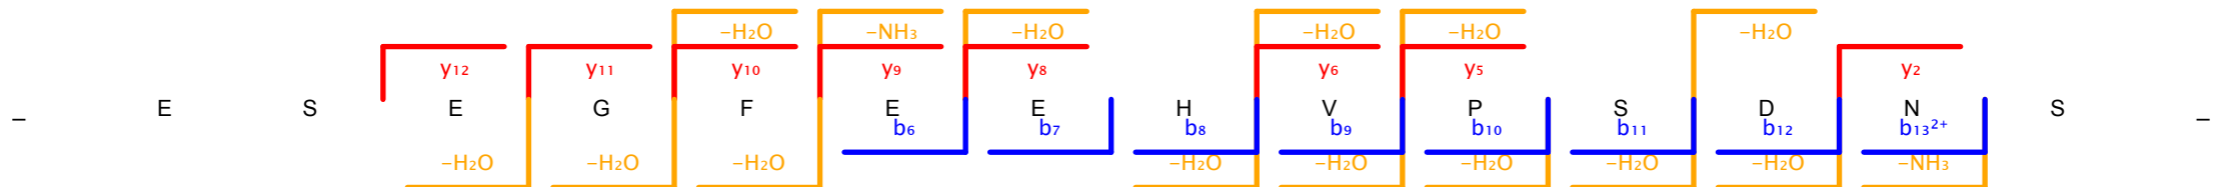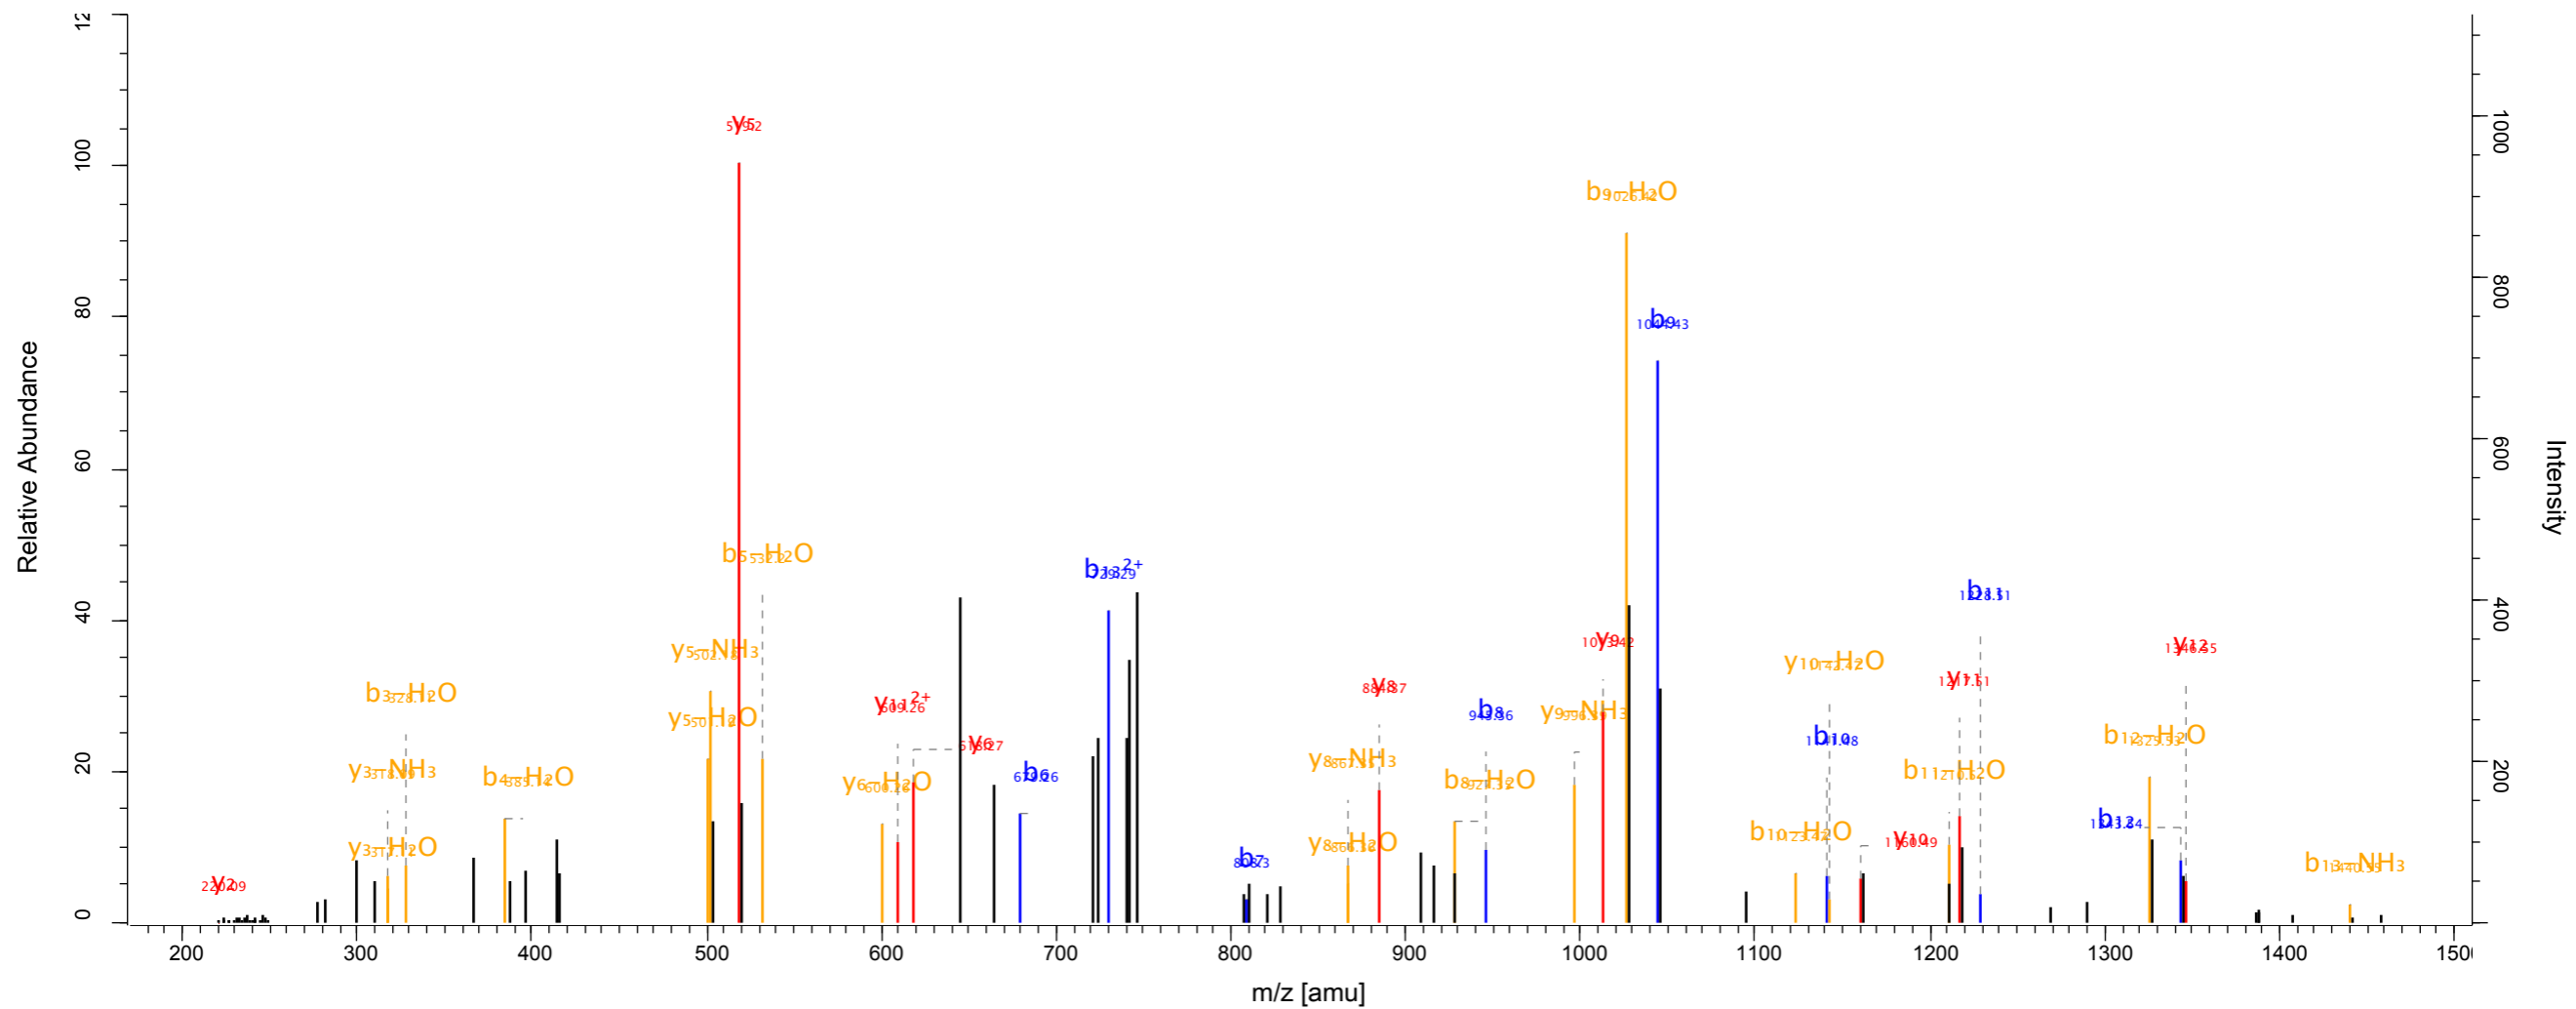

Scan number 3722 Raw file SKaraca\_LMB\_H1\_Forward\_041011\_5\_rep1  
 Method ITMS; CID Pepti... 112.08

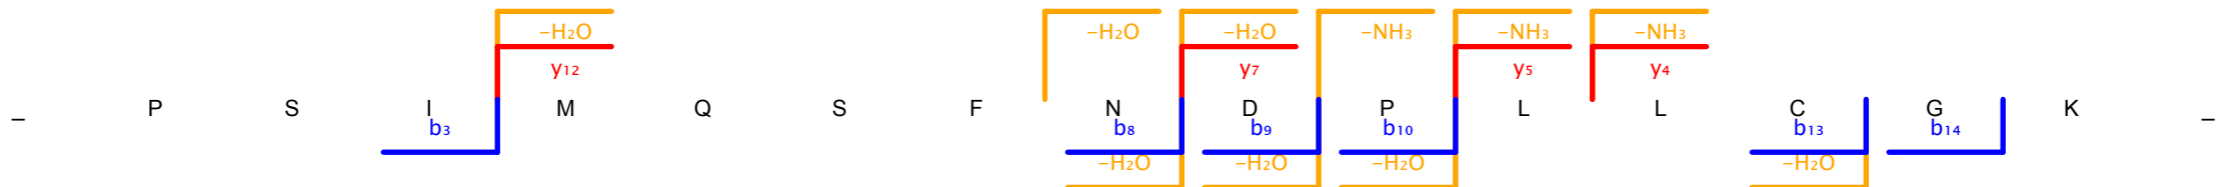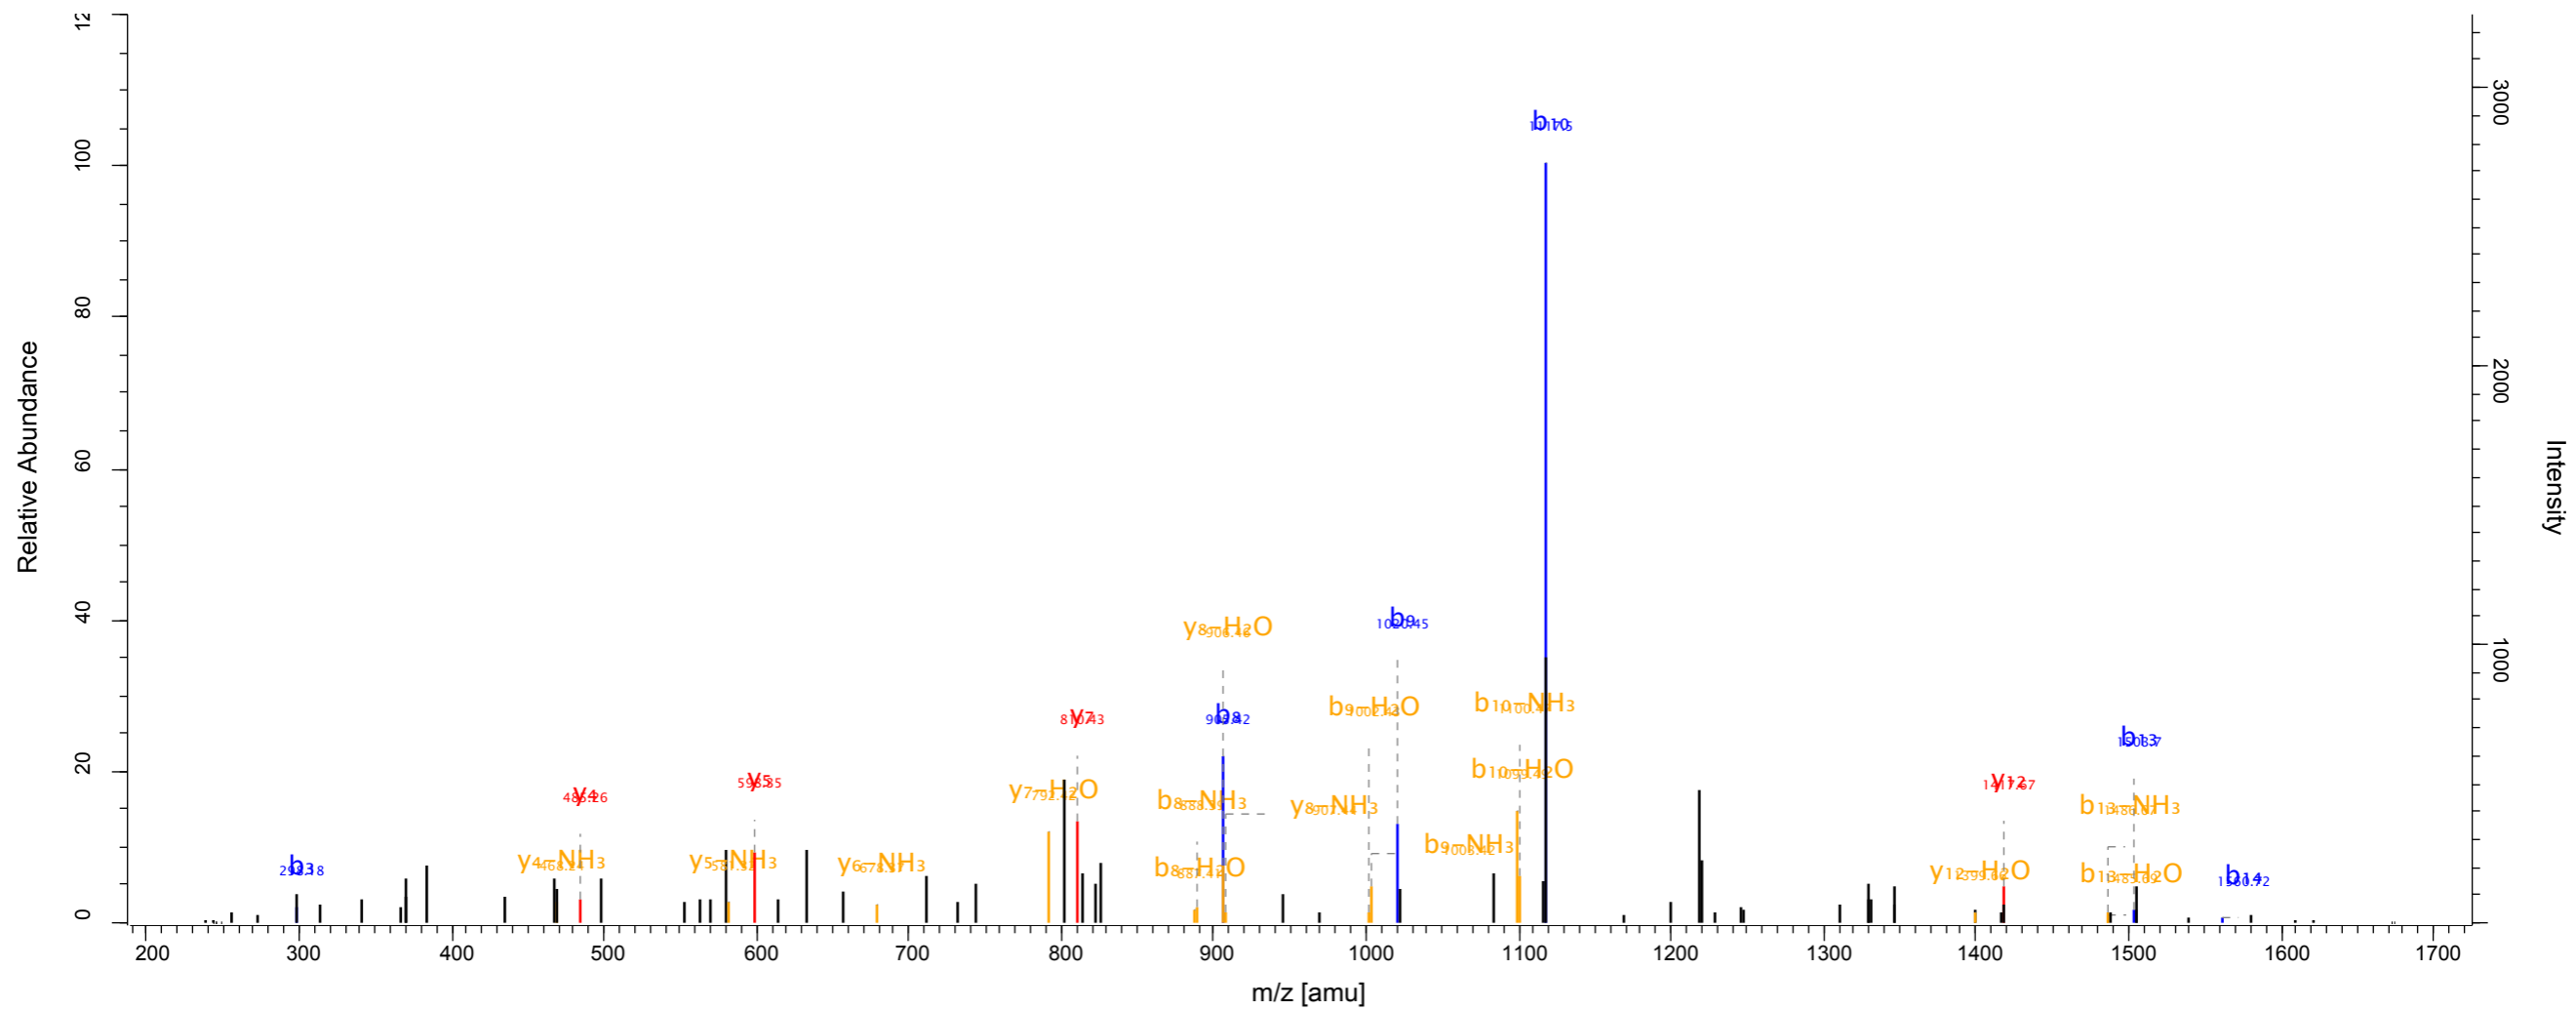



|             |           |          |                                      |
|-------------|-----------|----------|--------------------------------------|
| Scan number | 5531      | Raw file | SKaraca_LMB_H1_Forward_041011_6_rep2 |
| Method      | ITMS; CID | Pepti... | 140.45                               |

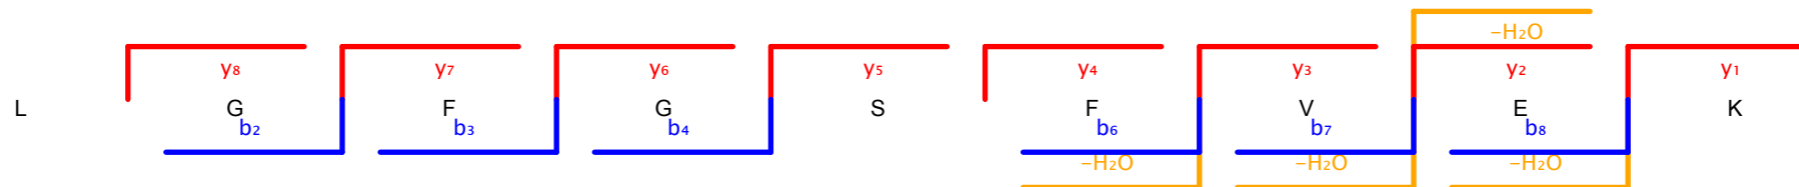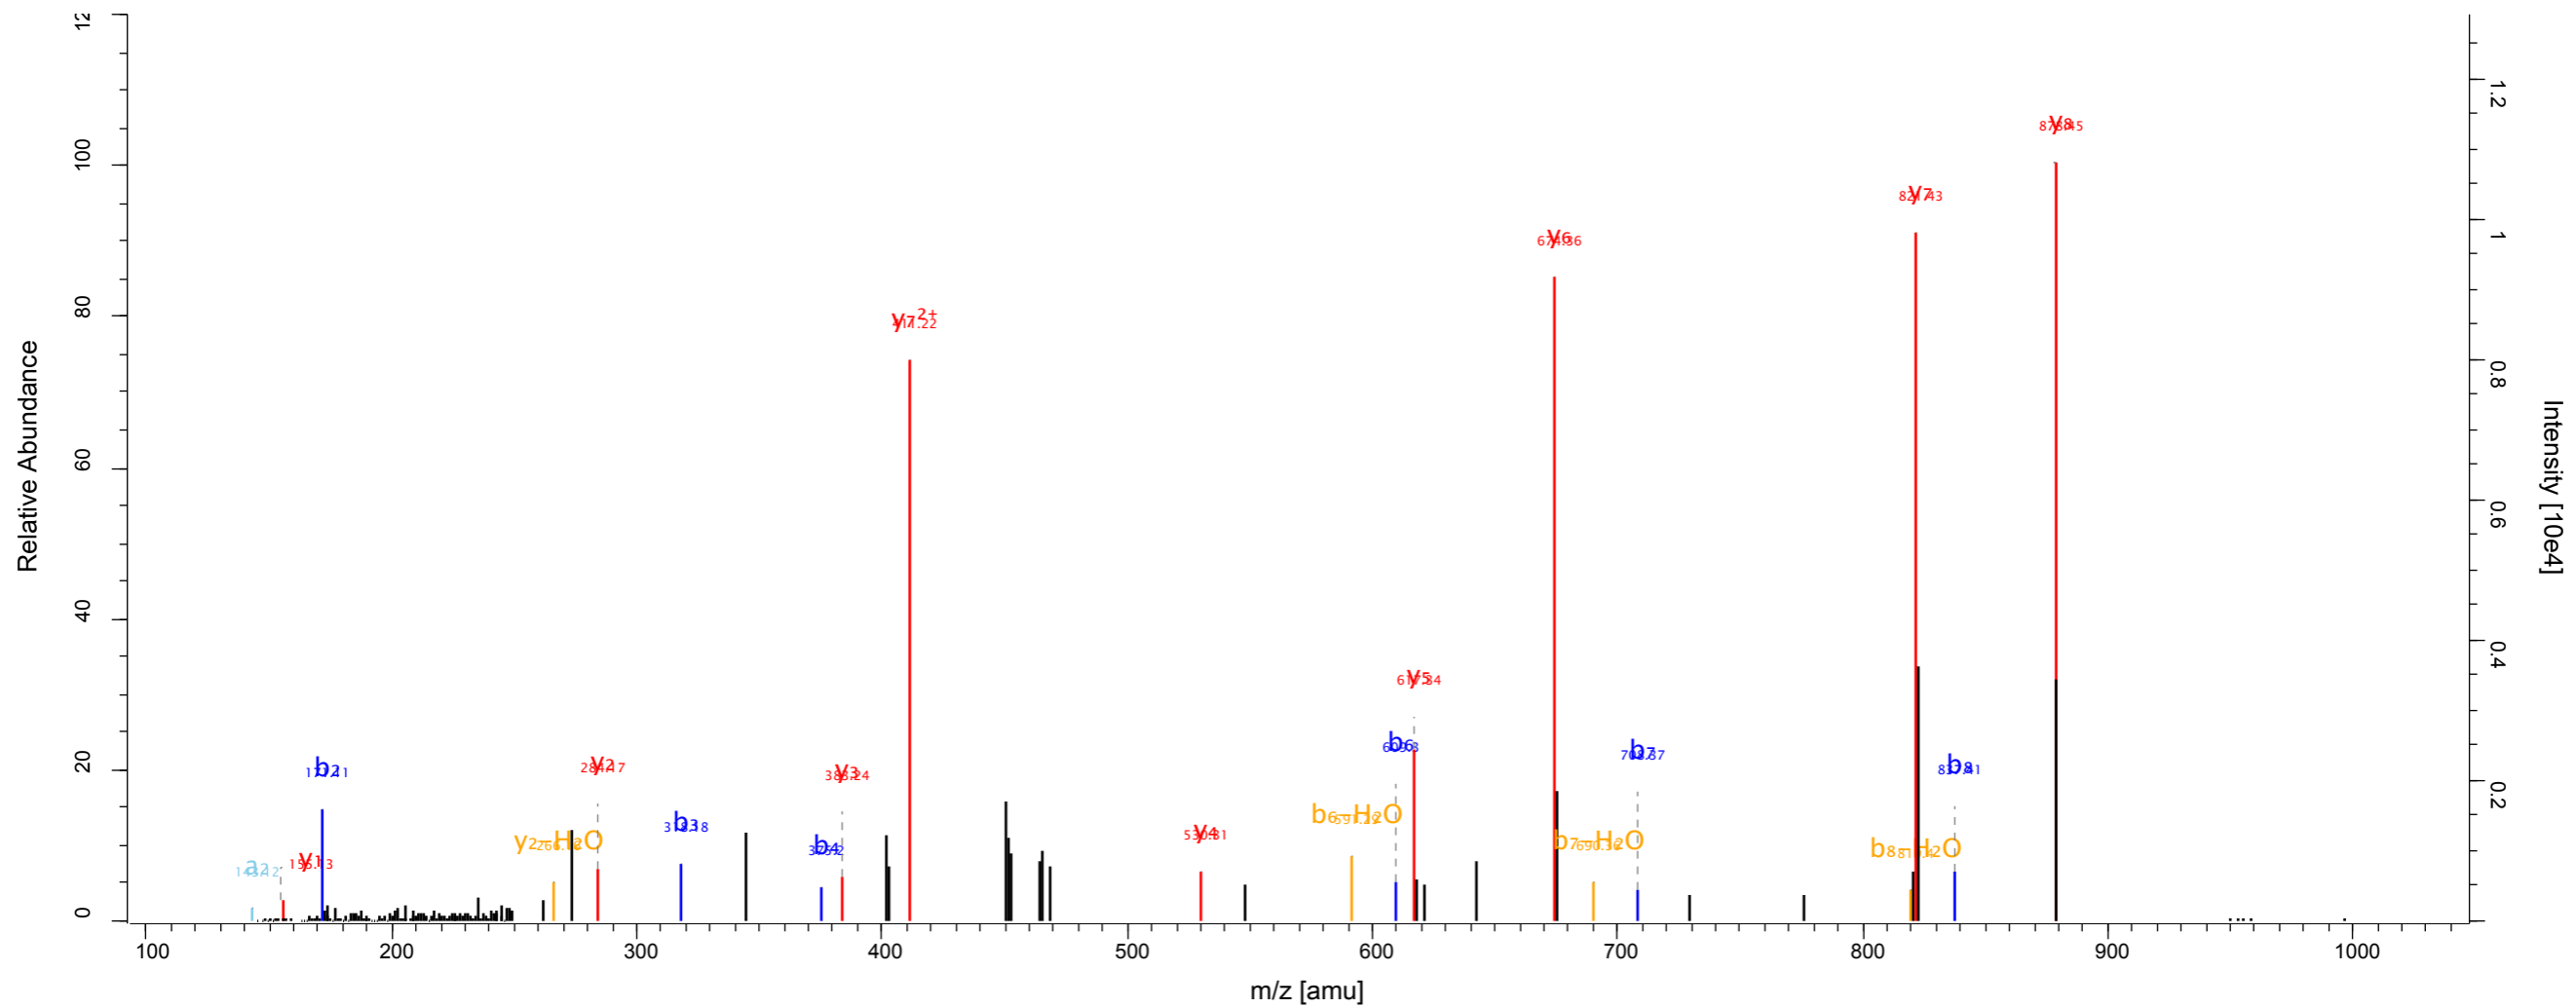

Scan number 7110 Raw file SKaraca\_LMB\_H1\_Forward\_041011\_7\_rep1  
 Method ITMS; CID Pepti... 165.66

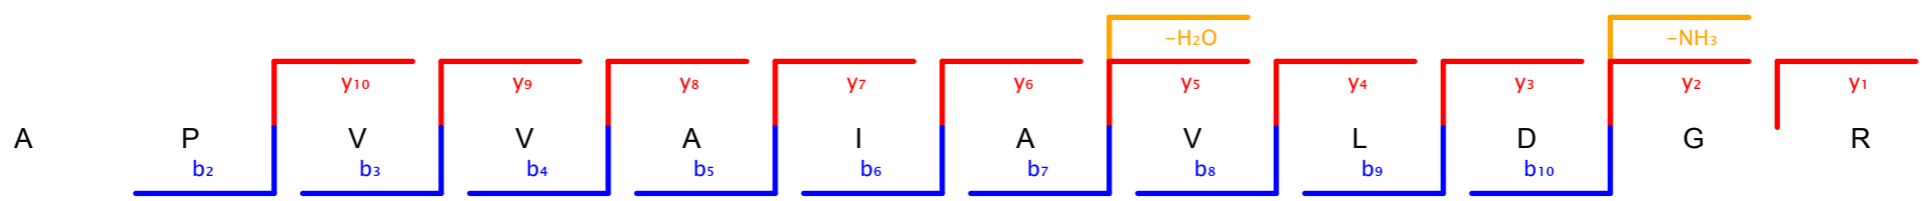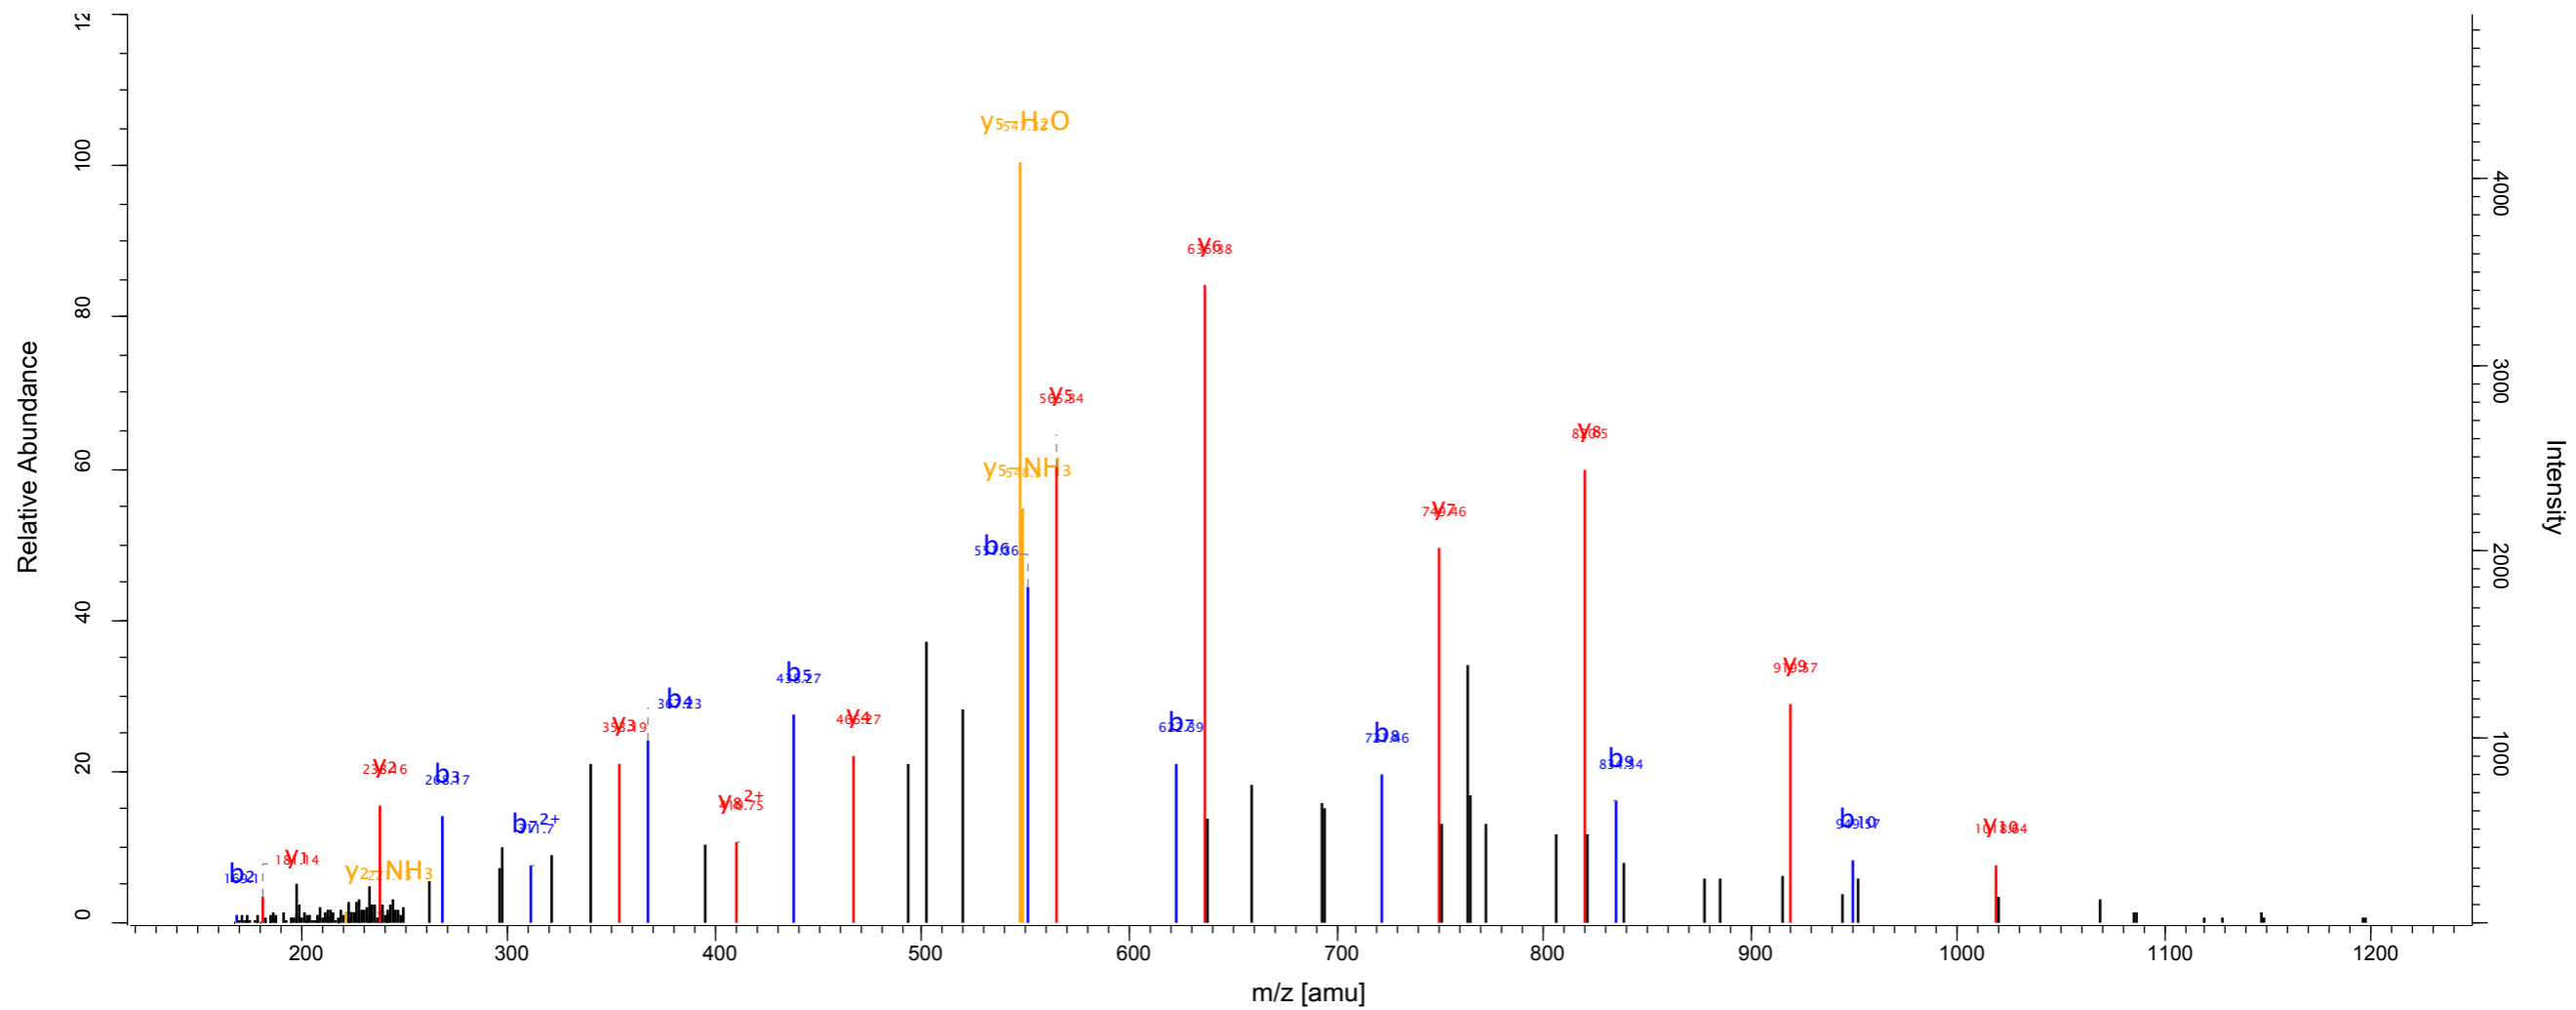

Scan number 4433 Raw file SKaraca\_LMB\_H1\_Forward\_041011\_8\_rep1  
 Method ITMS; CID Pepti... 124.42

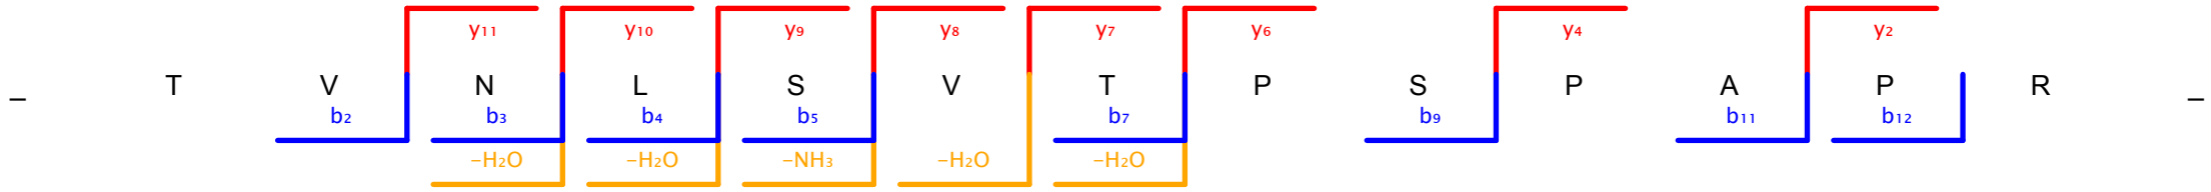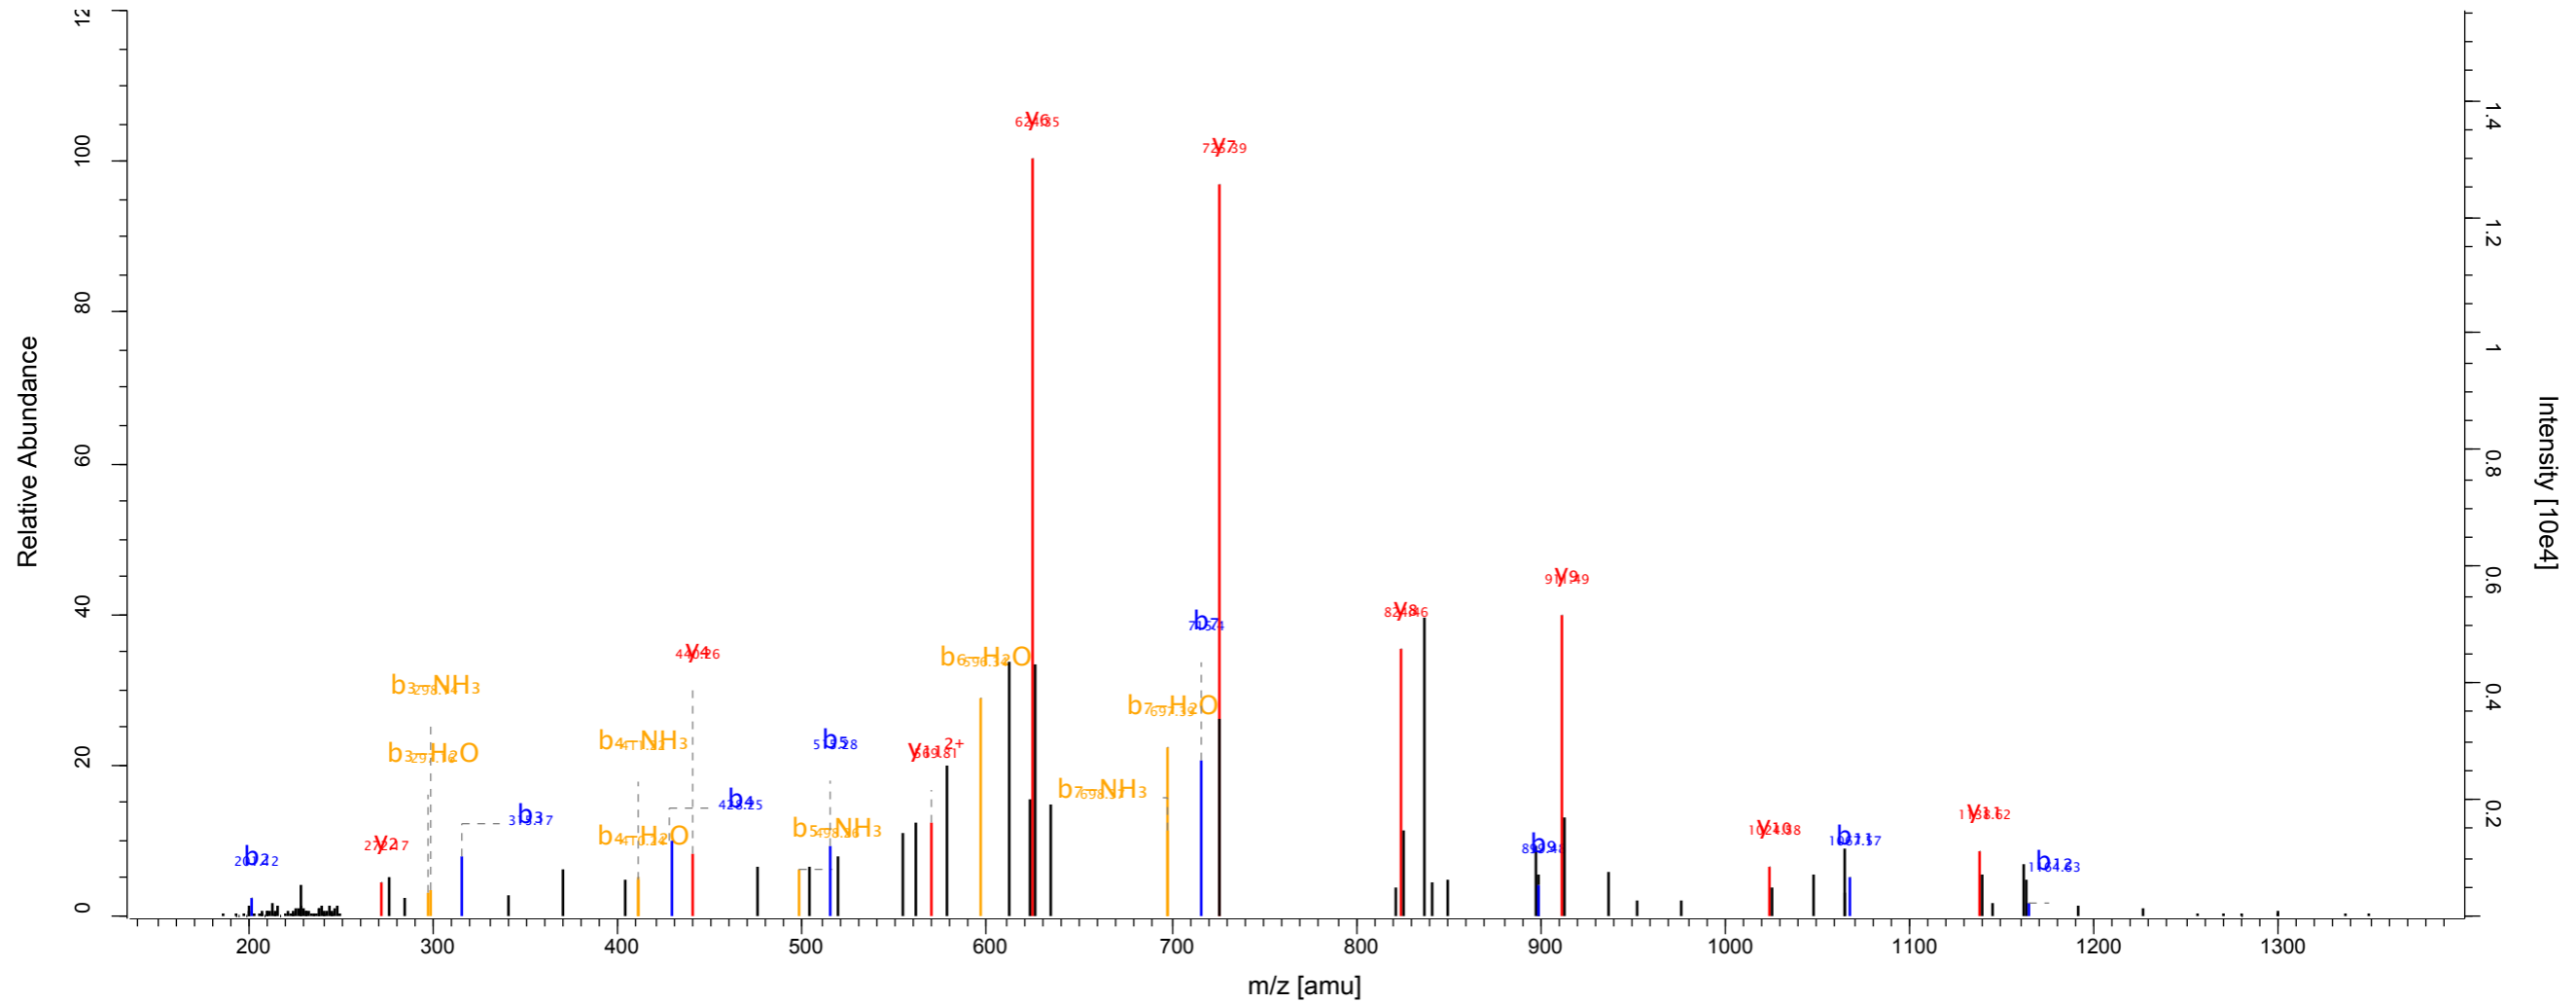

|             |           |          |                                      |
|-------------|-----------|----------|--------------------------------------|
| Scan number | 4418      | Raw file | SKaraca_LMB_H1_Forward_041011_8_rep2 |
| Method      | ITMS; CID | Pepti... | 140.14                               |

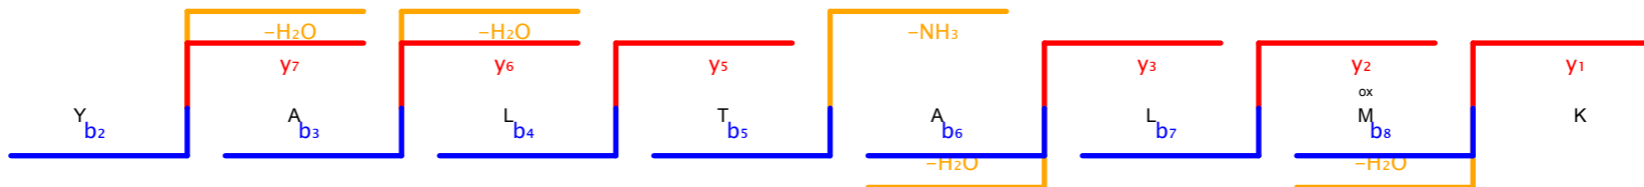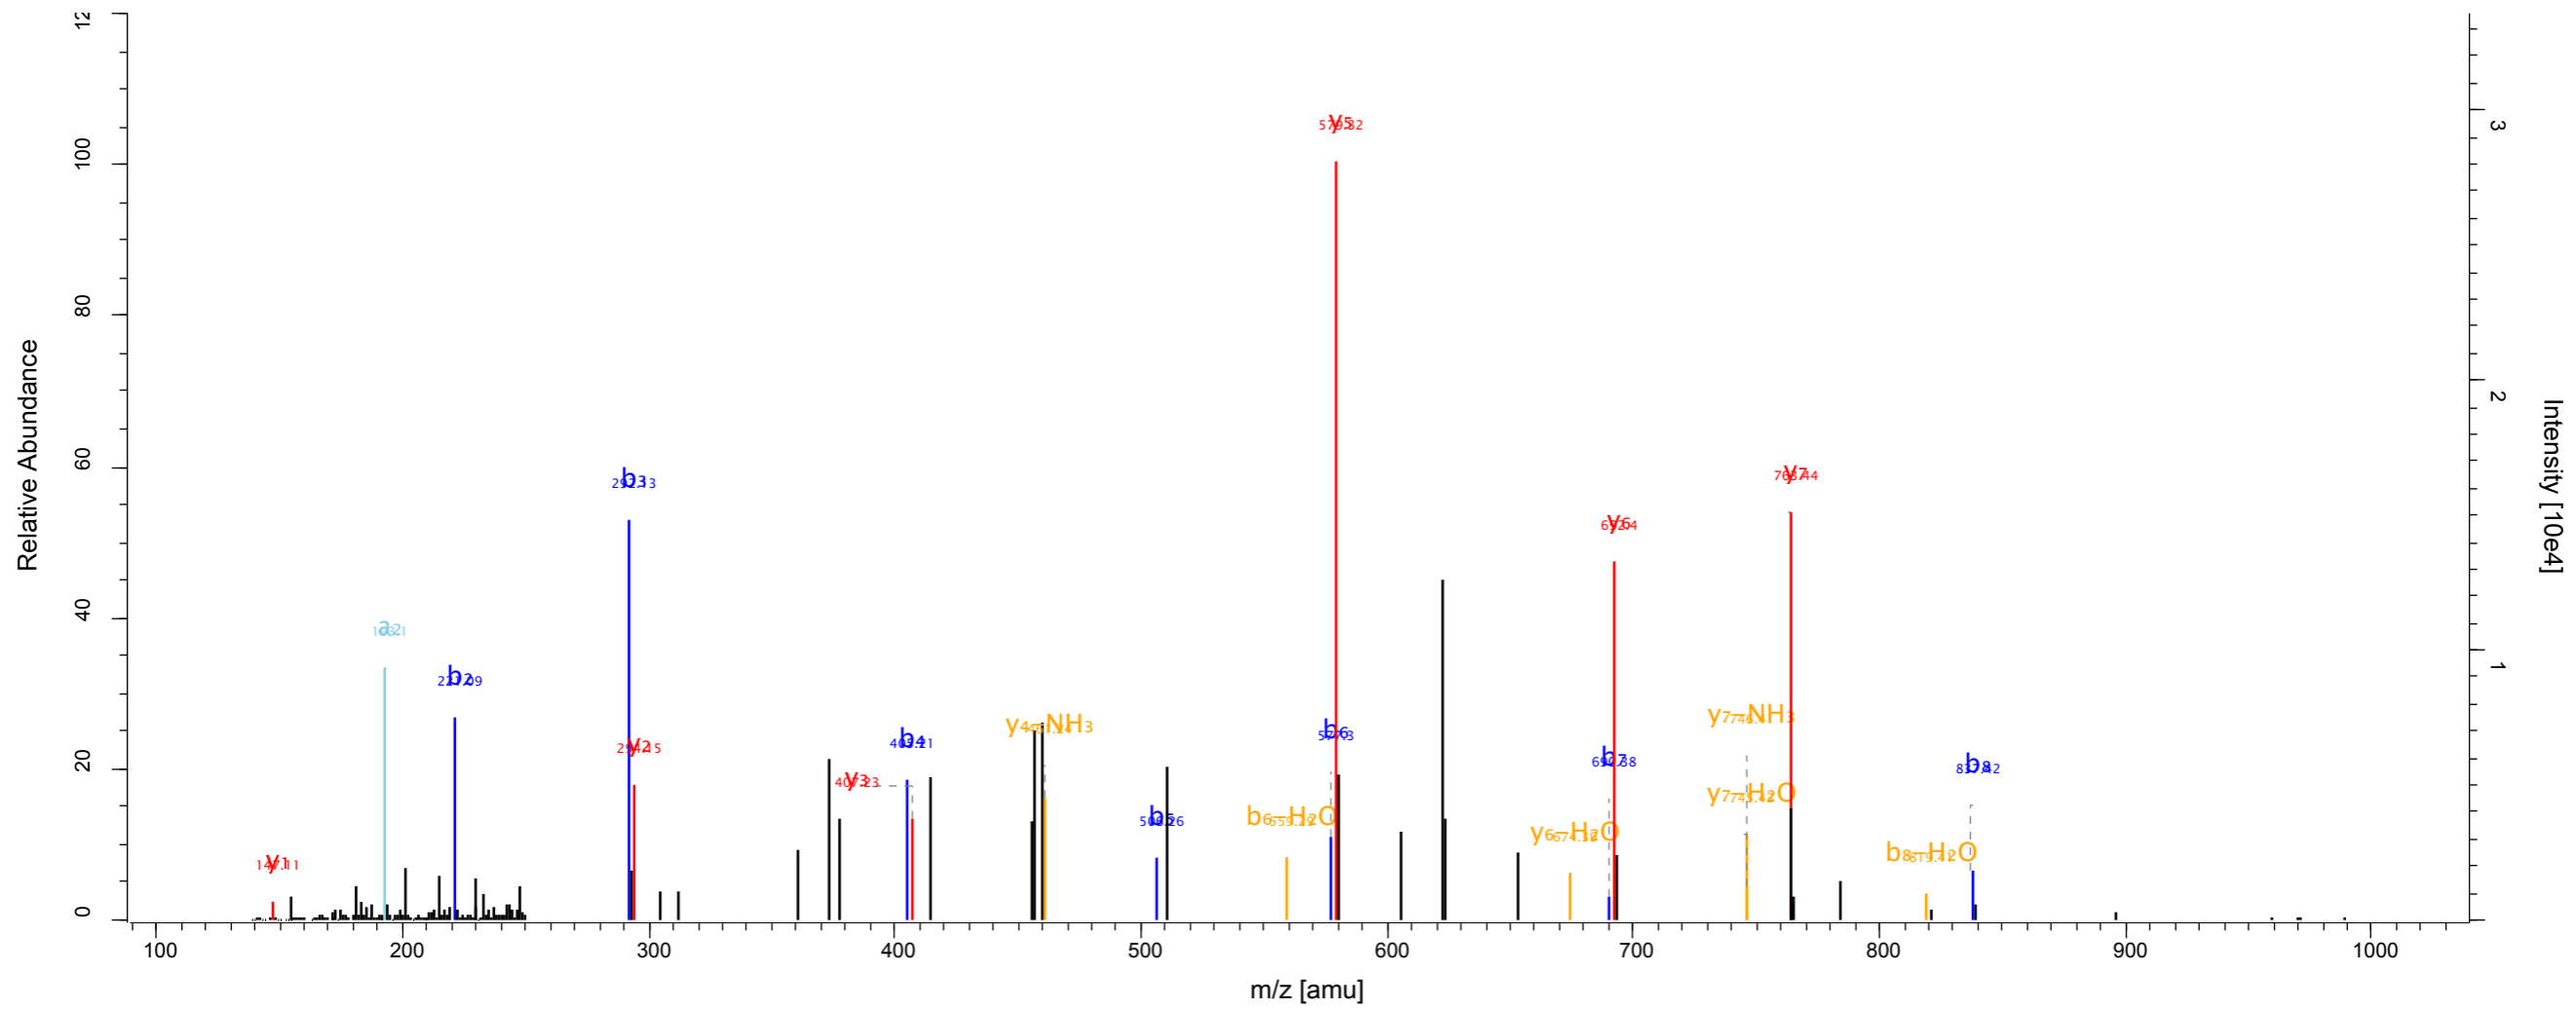

Scan number 8087 Raw file SKaraca\_LMB\_H1\_forward\_180811\_10\_rep1  
 Method ITMS; CID Pepti... 130.94

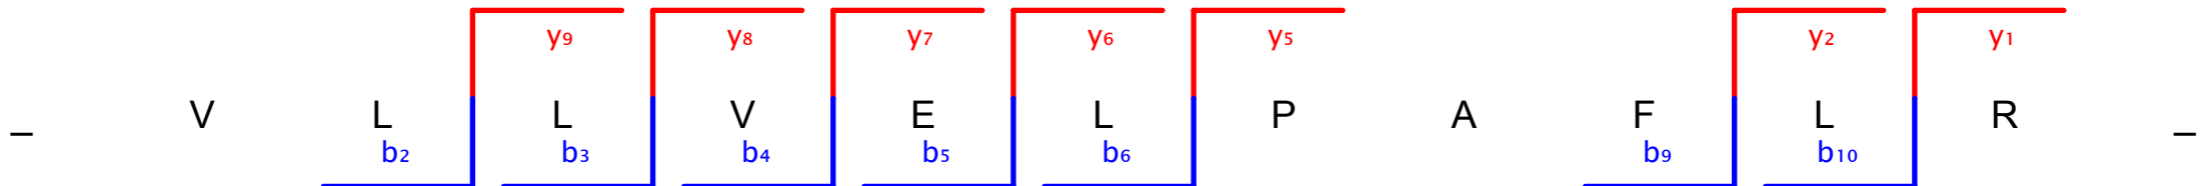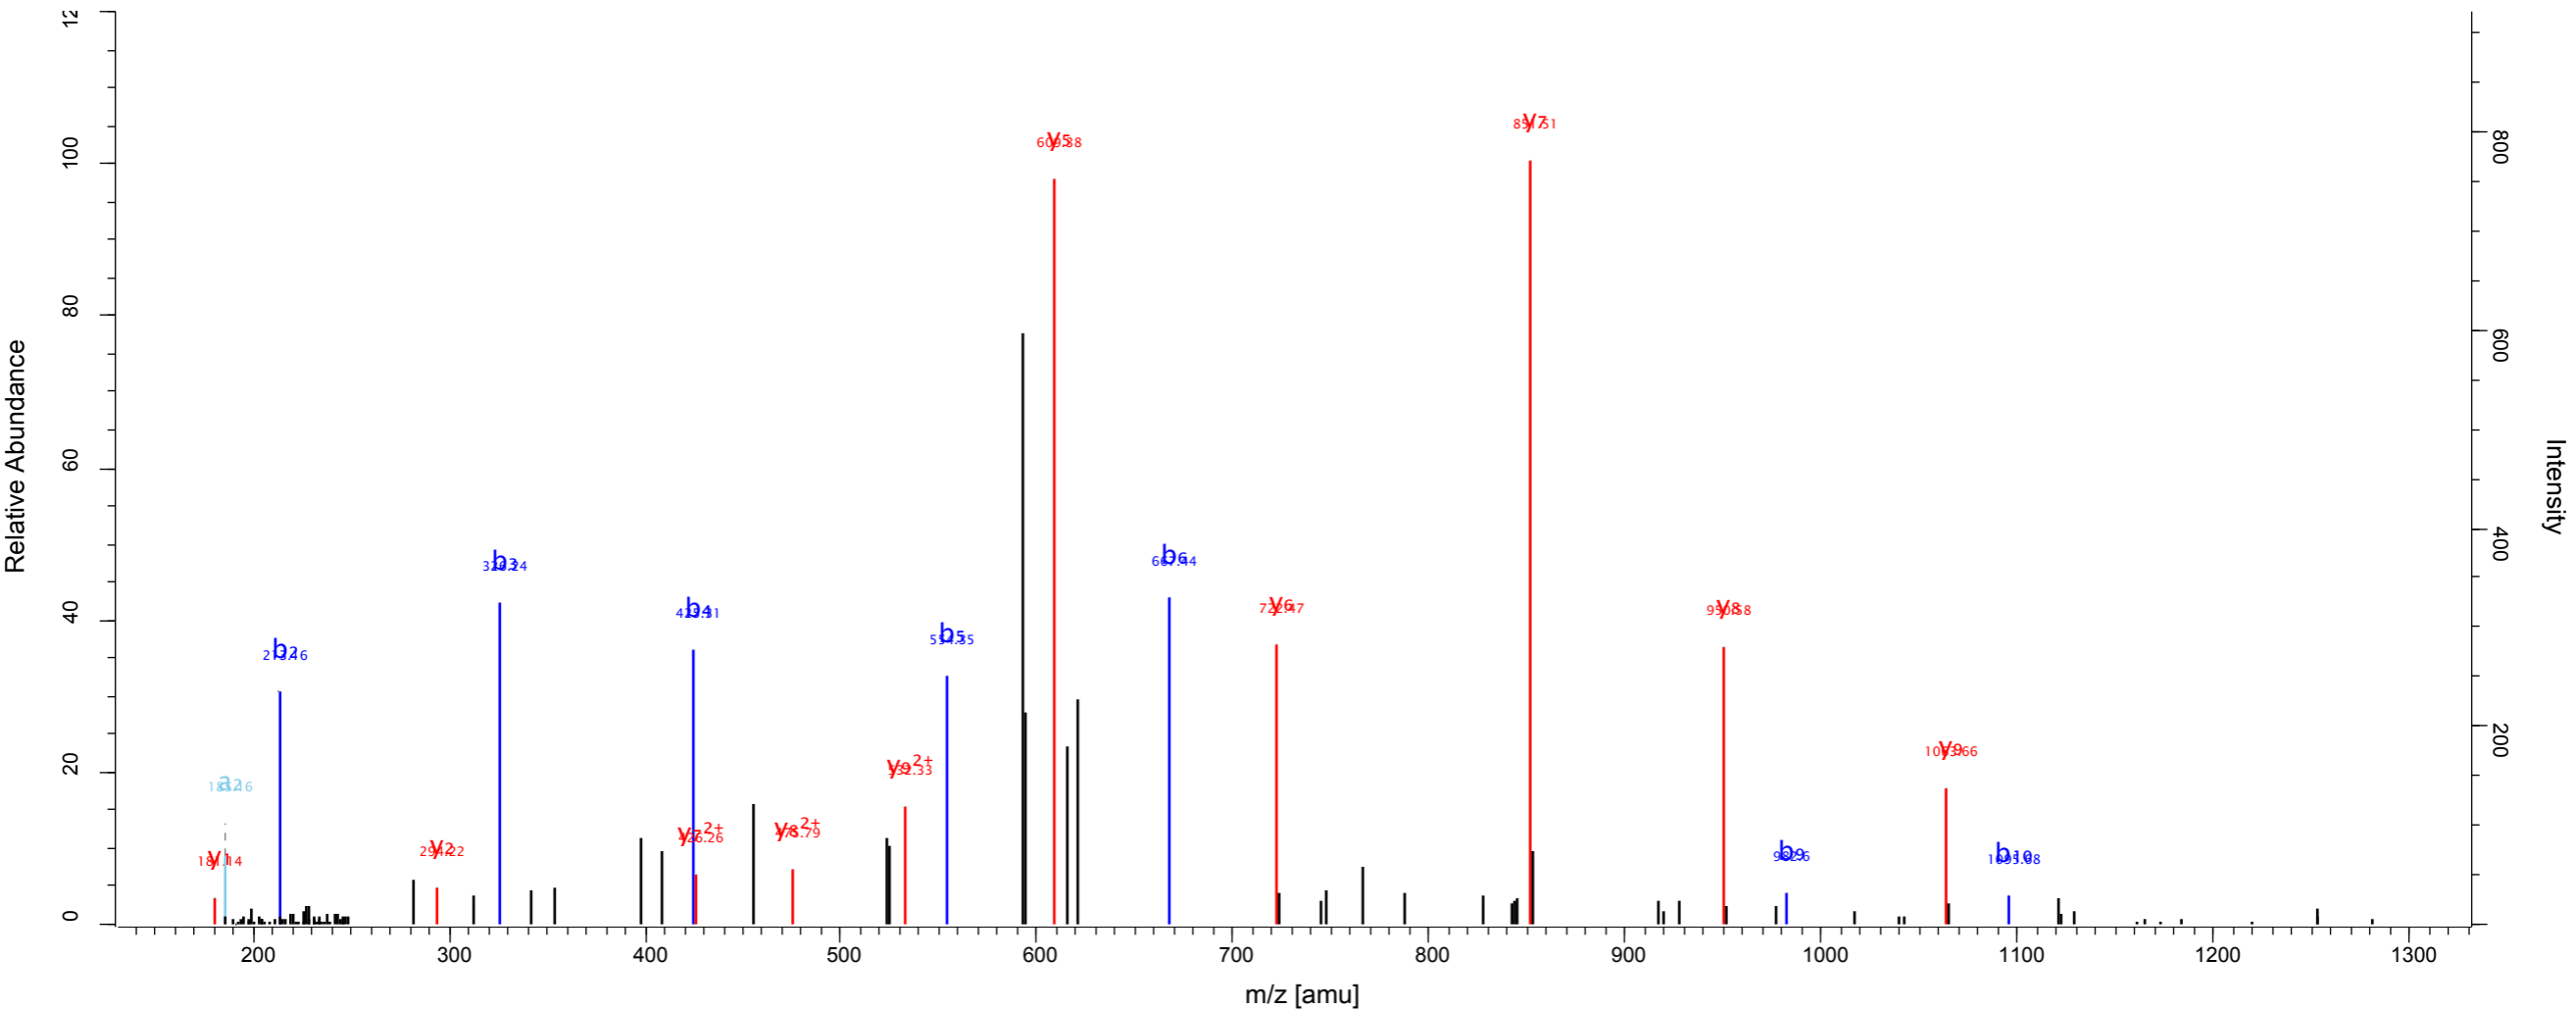

Scan number 4362 Raw file SKaraca\_LMB\_H1\_forward\_180811\_10\_rep2  
 Method ITMS; CID Pepti... 118.9

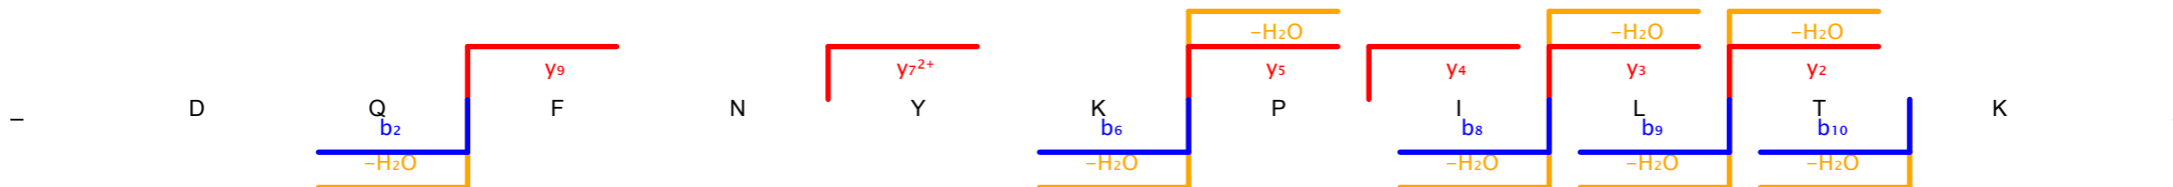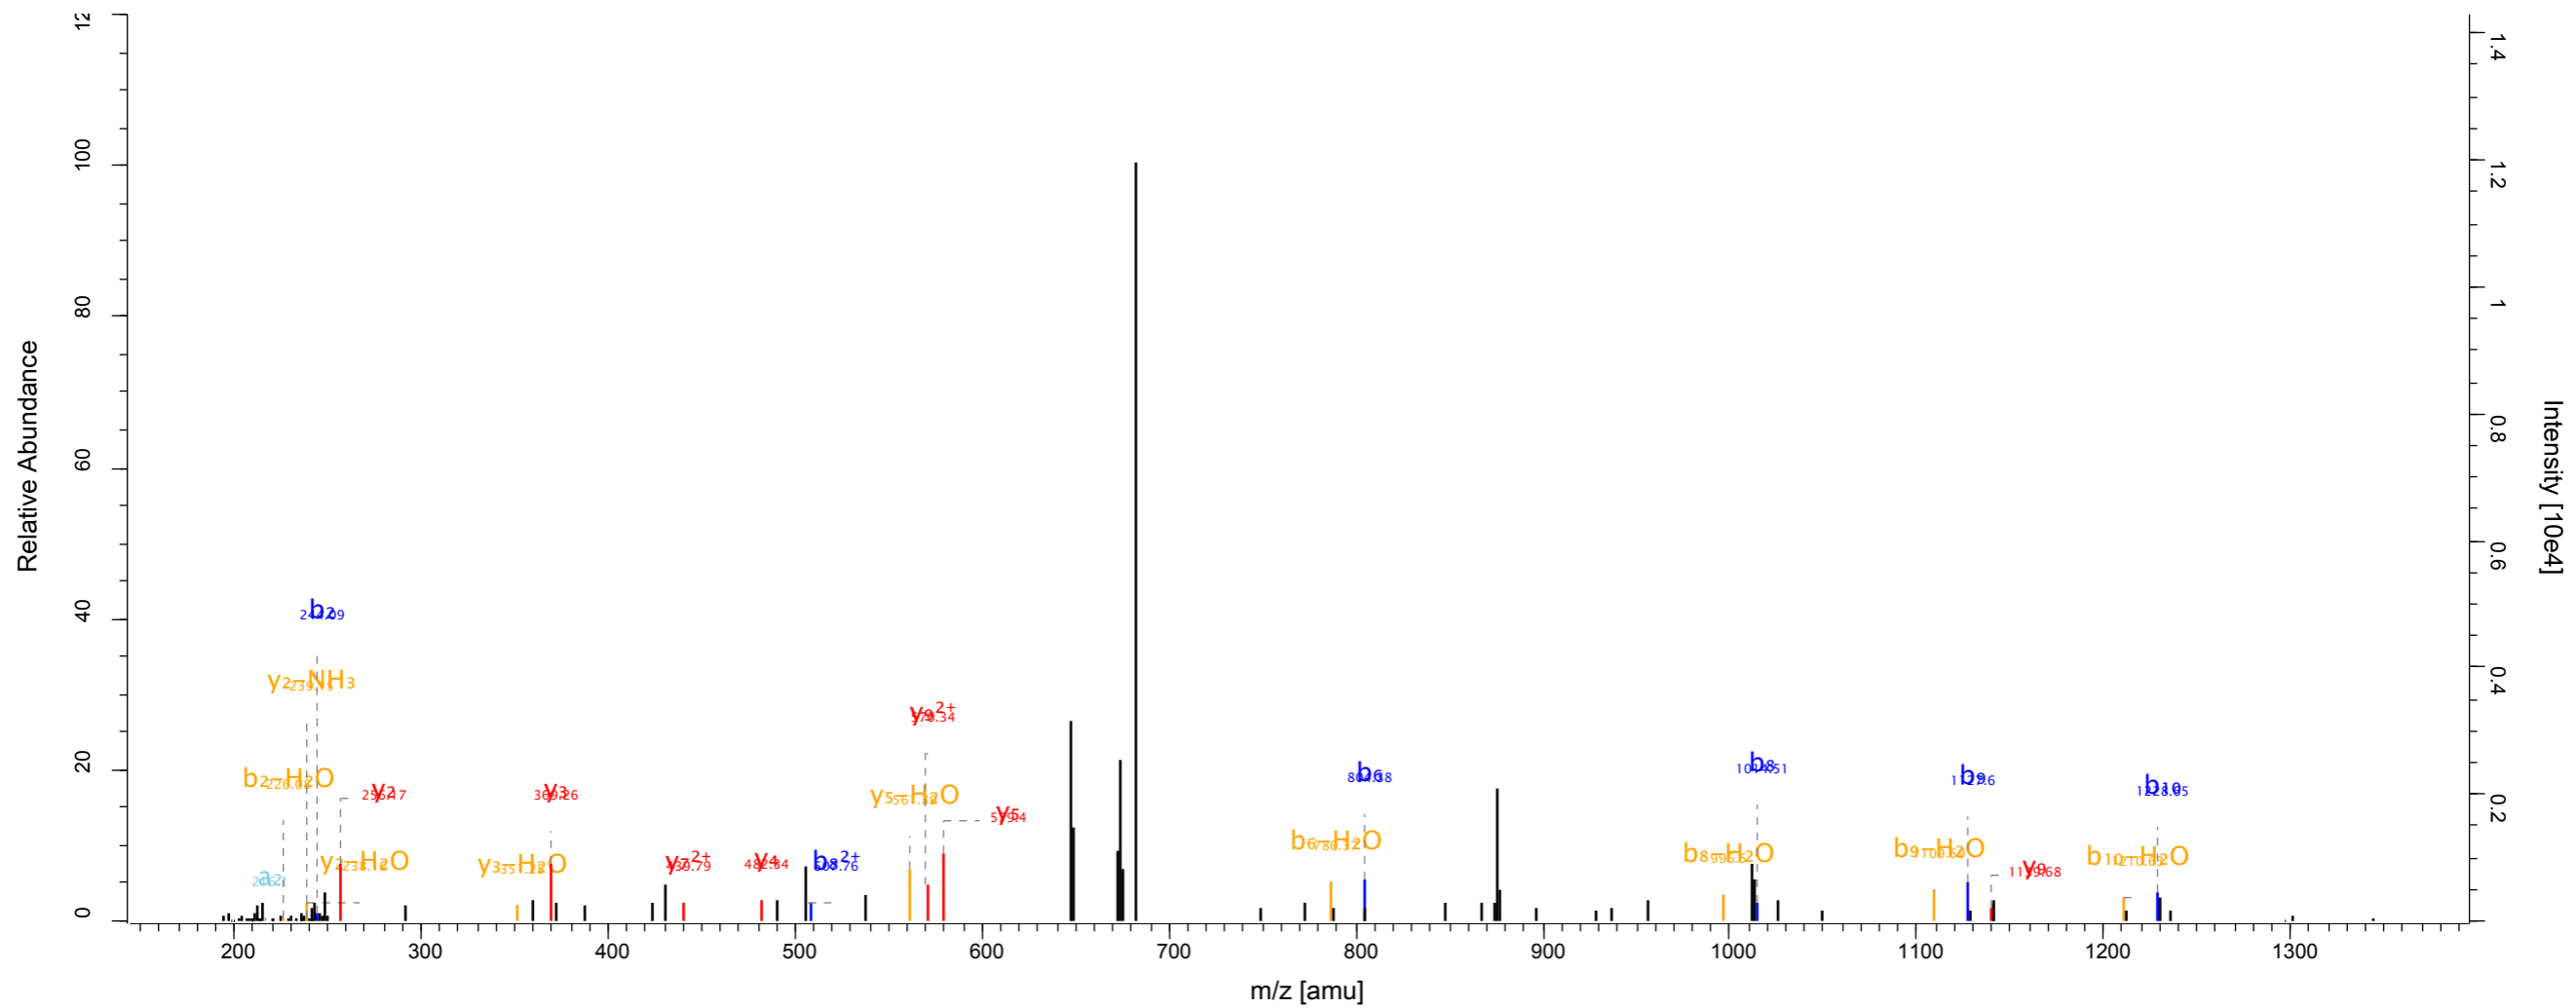

Scan number 4197 Raw file SKaraca\_LMB\_H1\_forward\_180811\_11\_rep1  
 Method ITMS; CID Pepti... 141.73

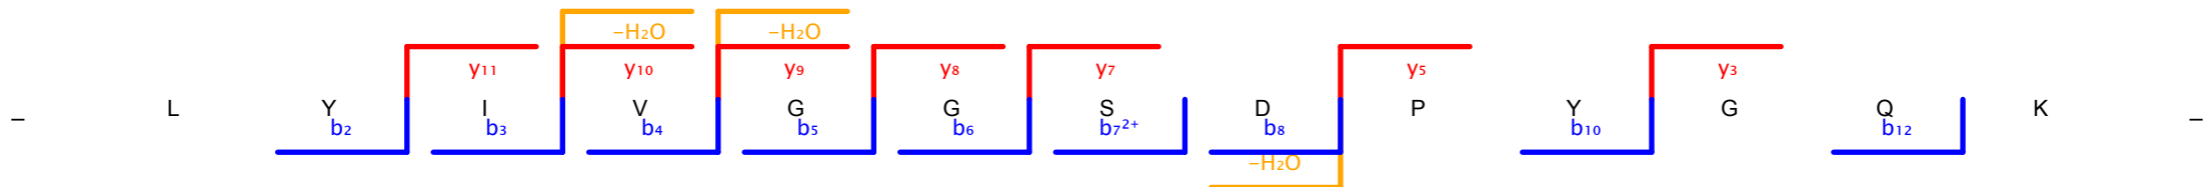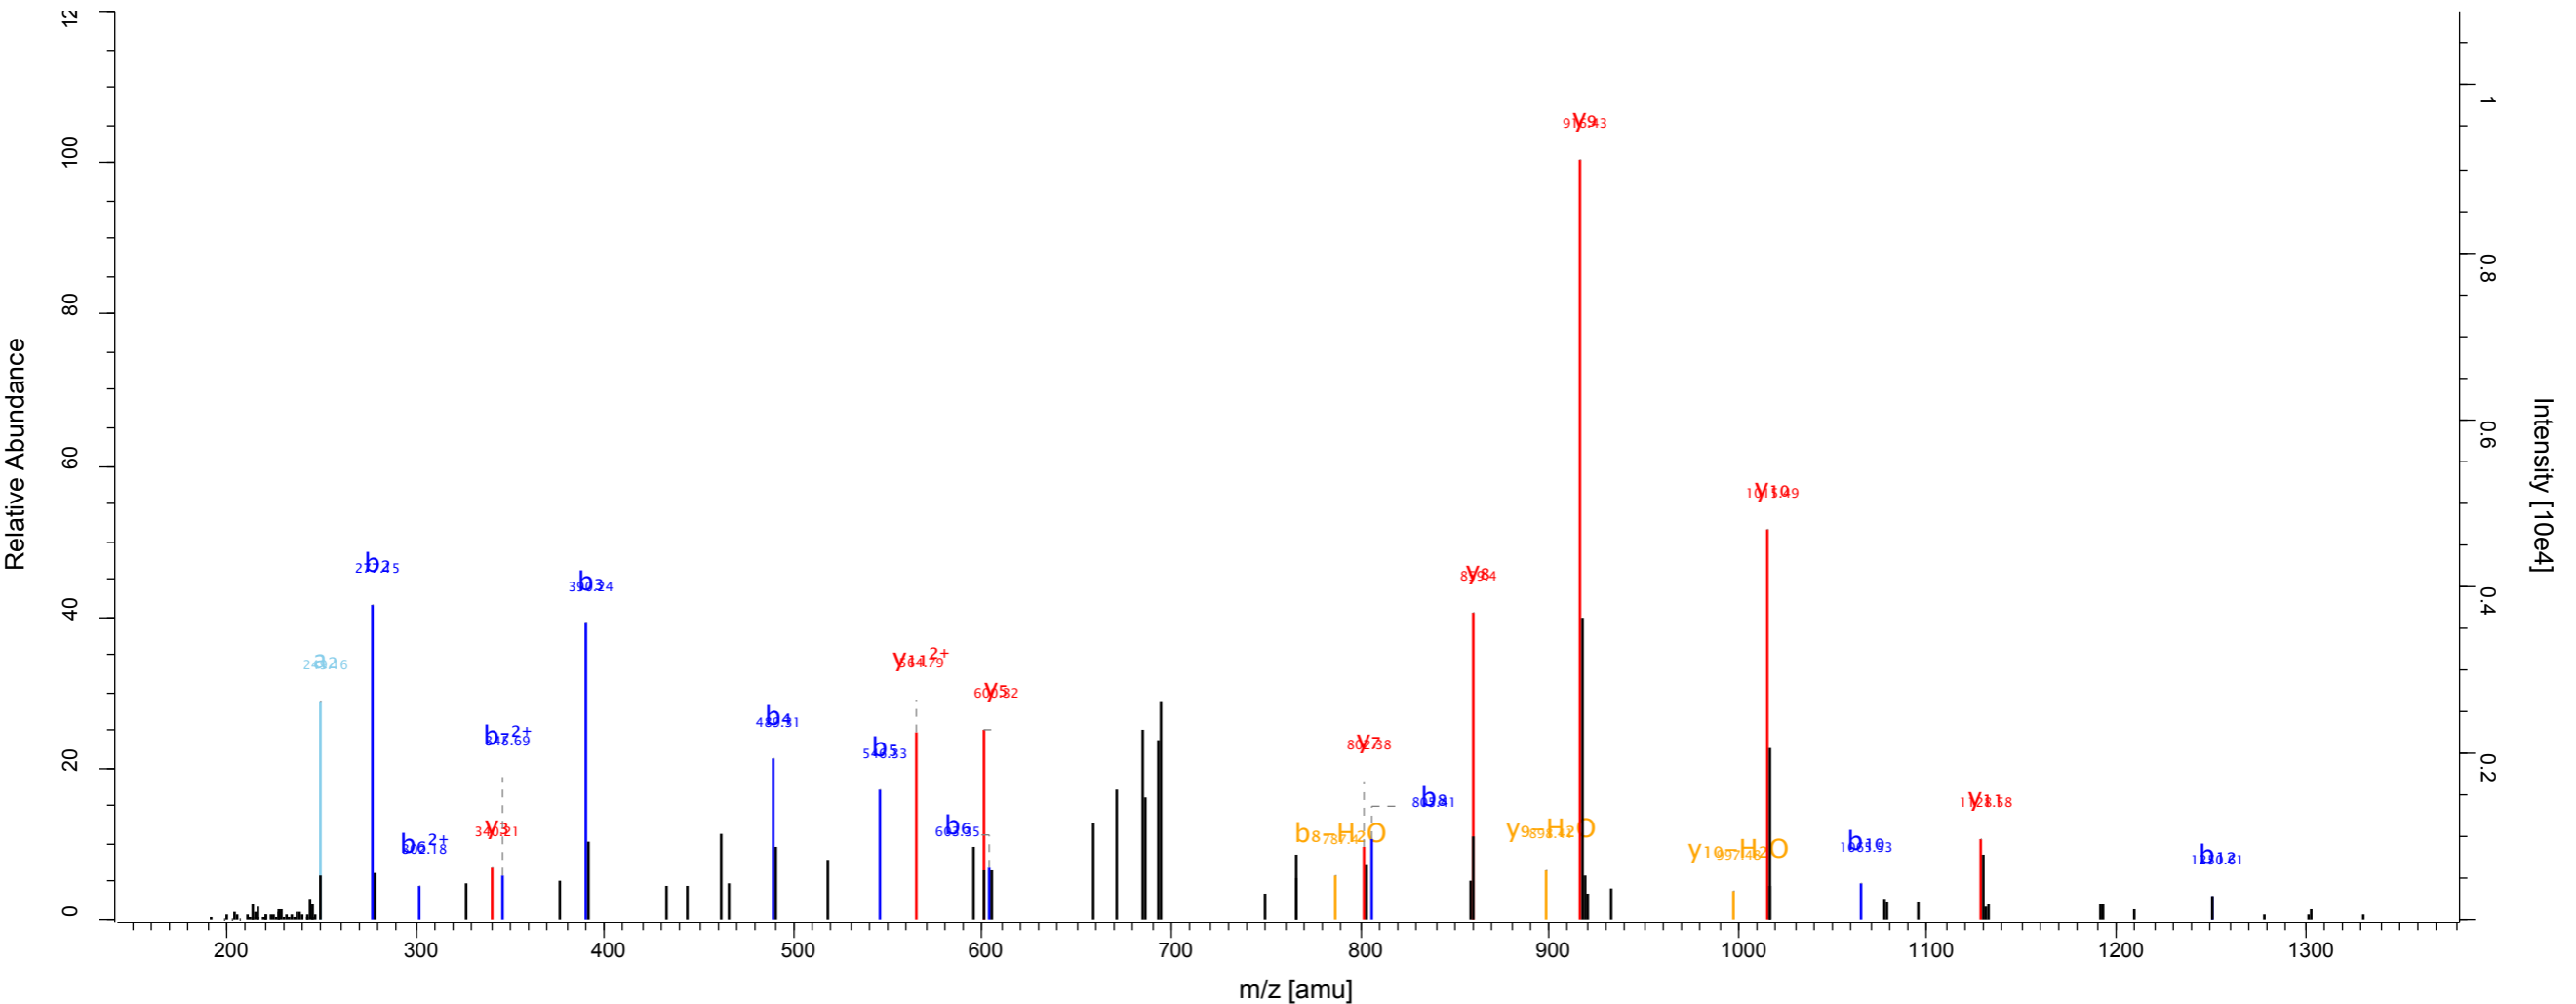

|             |           |          |                                       |
|-------------|-----------|----------|---------------------------------------|
| Scan number | 6835      | Raw file | SKaraca_LMB_H1_forward_180811_11_rep1 |
| Method      | ITMS; CID | Pepti... | 112.67                                |

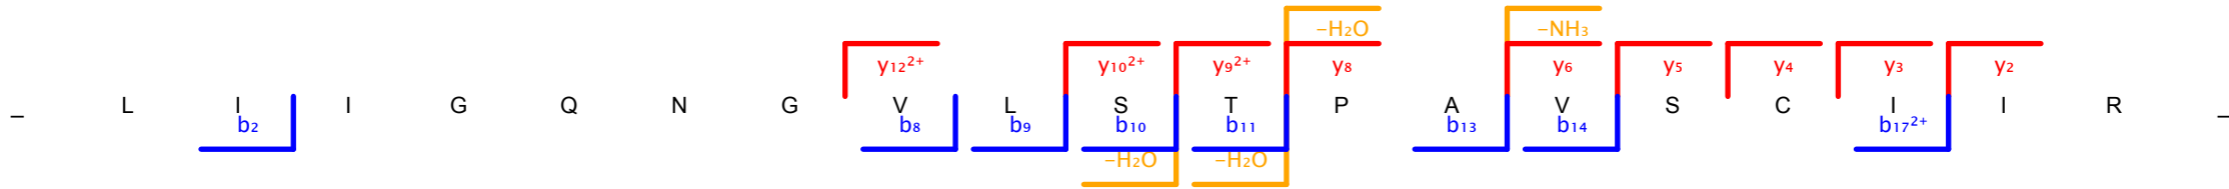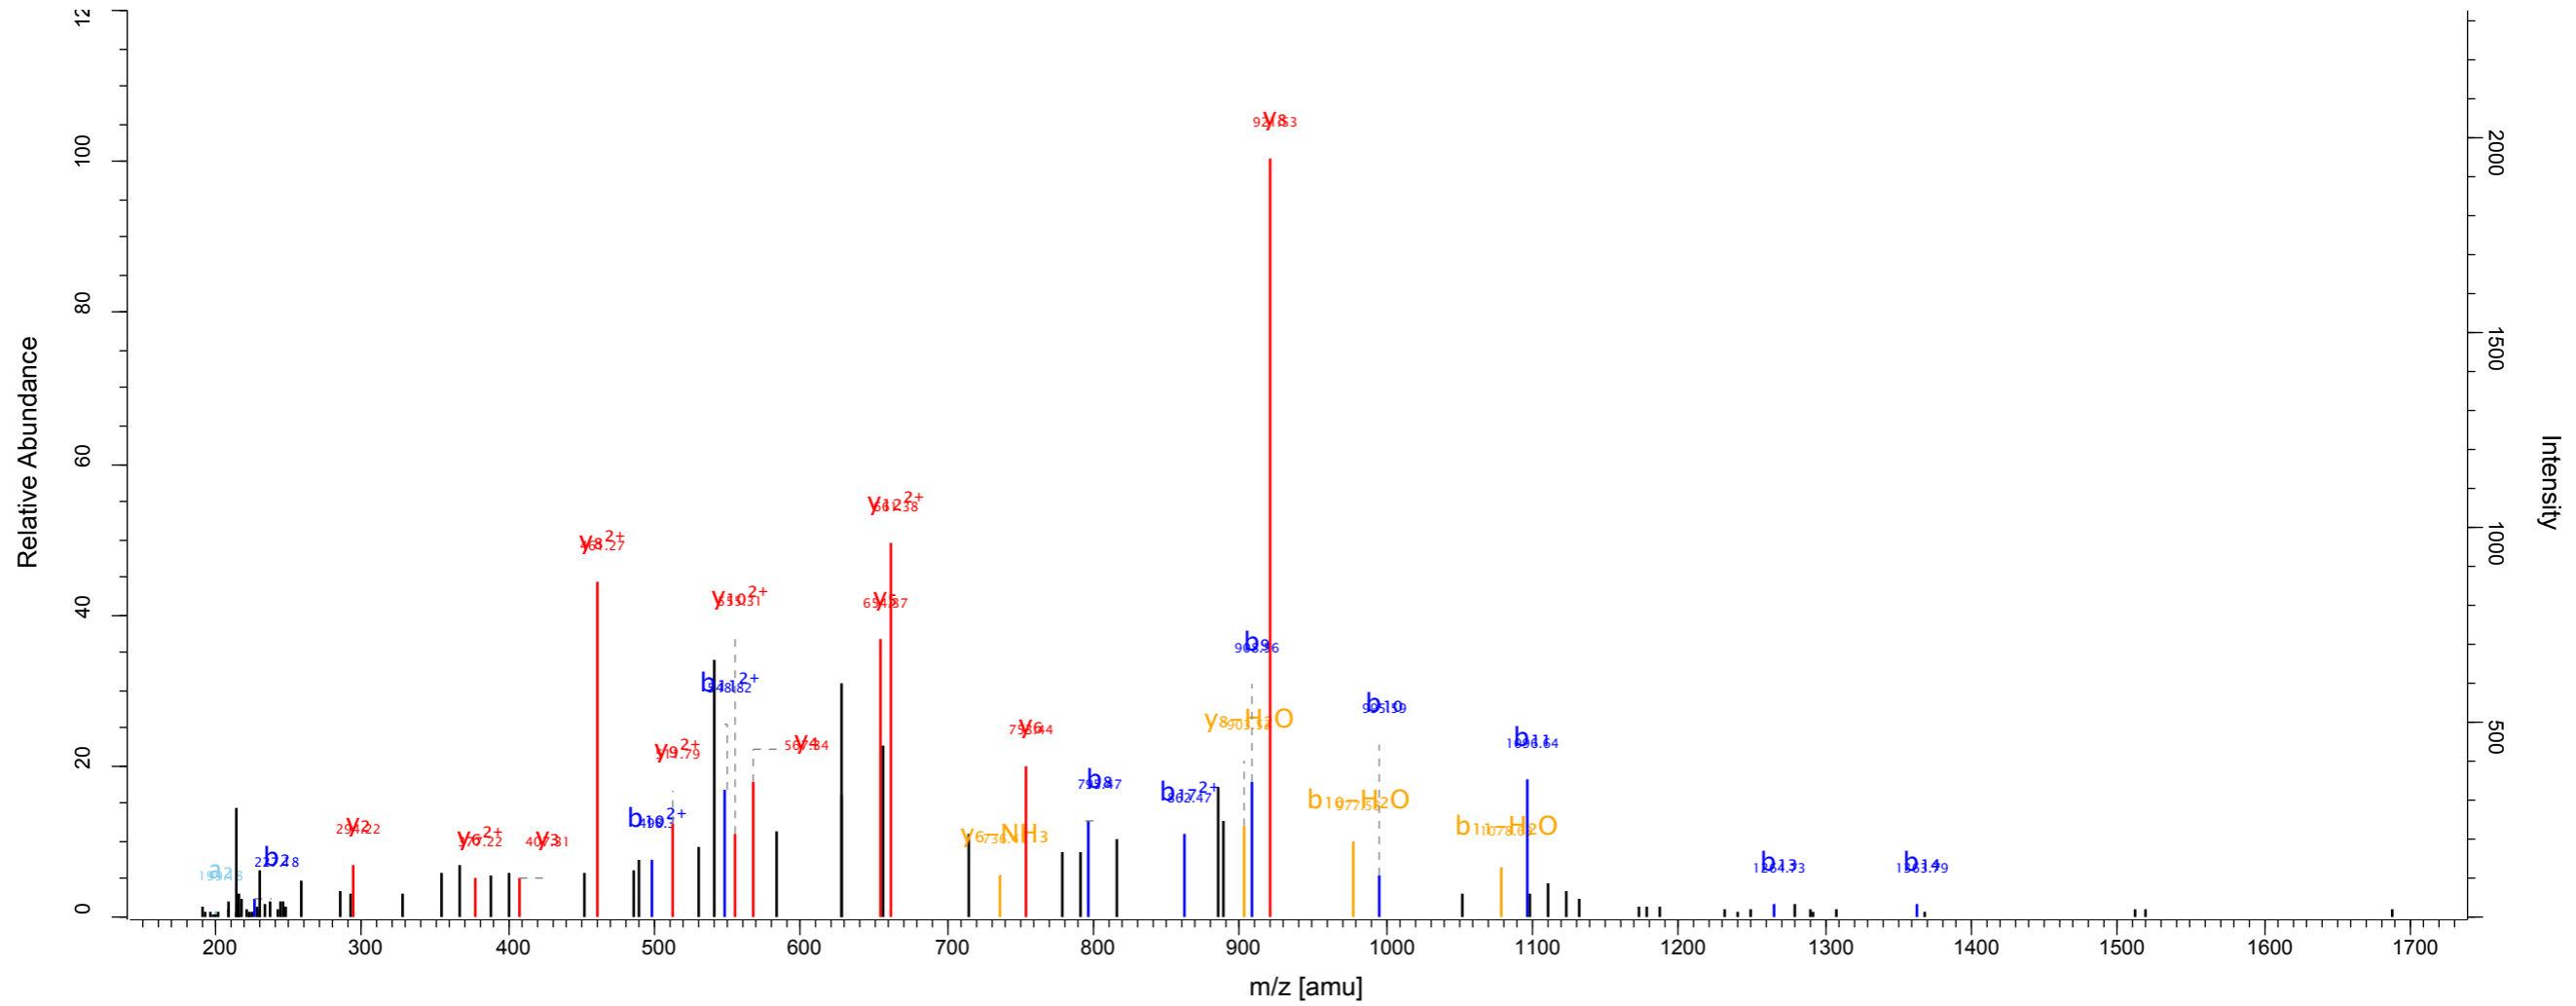



|             |           |          |                                       |
|-------------|-----------|----------|---------------------------------------|
| Scan number | 2258      | Raw file | SKaraca_LMB_H1_forward_180811_16_rep1 |
| Method      | ITMS; CID | Pepti... | 115.29                                |

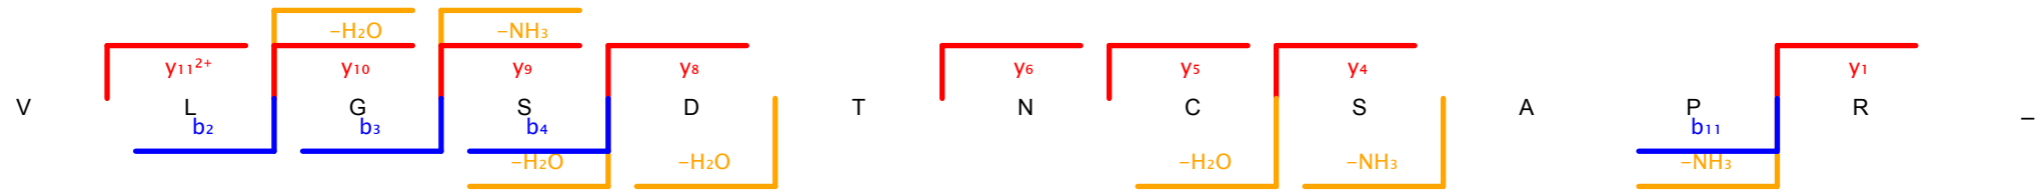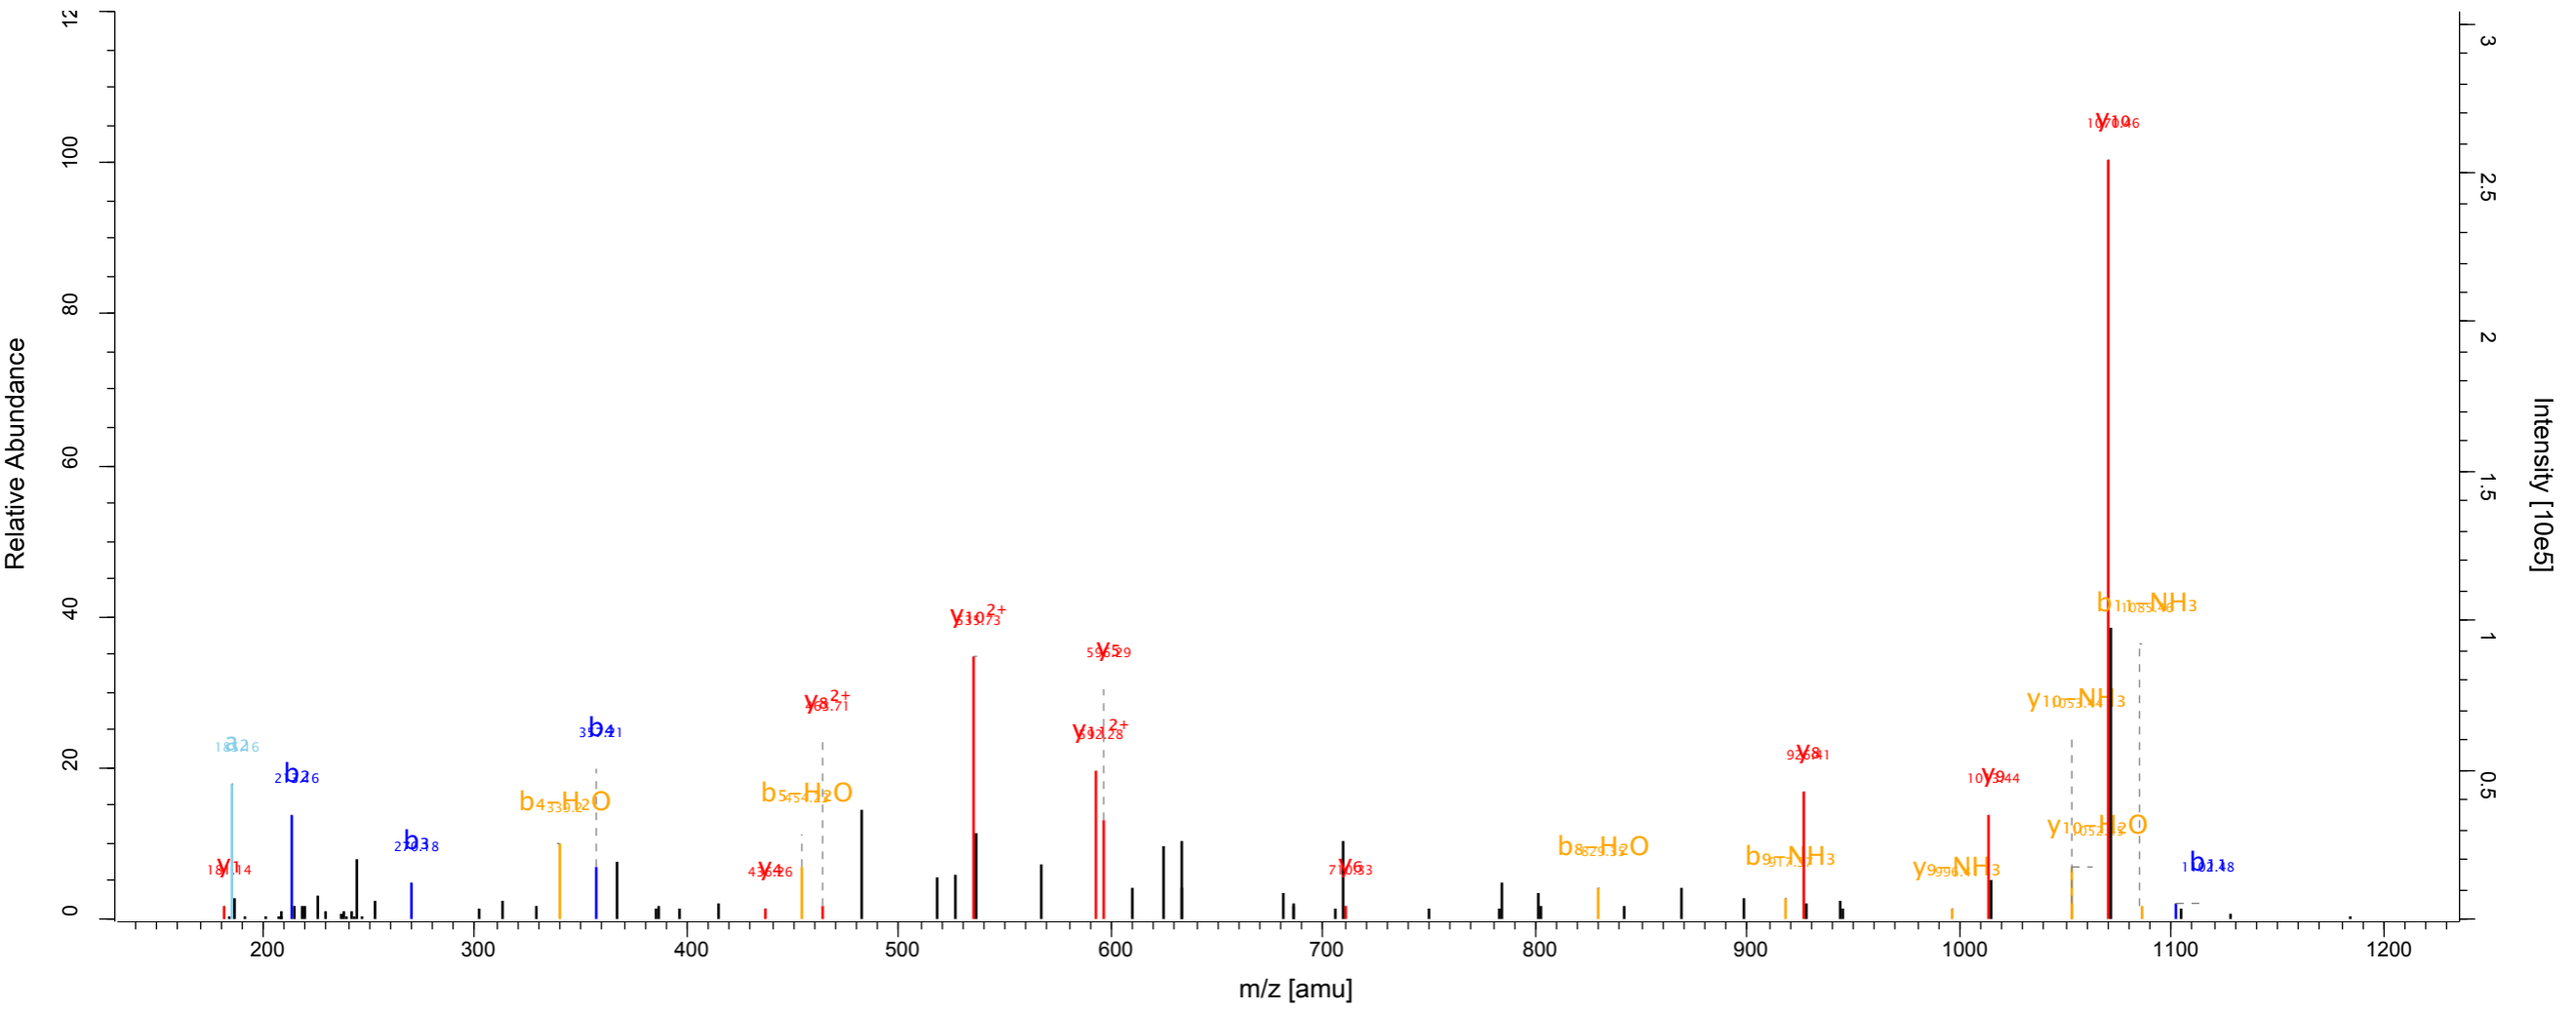

|             |           |          |                                       |
|-------------|-----------|----------|---------------------------------------|
| Scan number | 6161      | Raw file | SKaraca_LMB_H1_forward_180811_16_rep1 |
| Method      | ITMS; CID | Pepti... | 145.09                                |

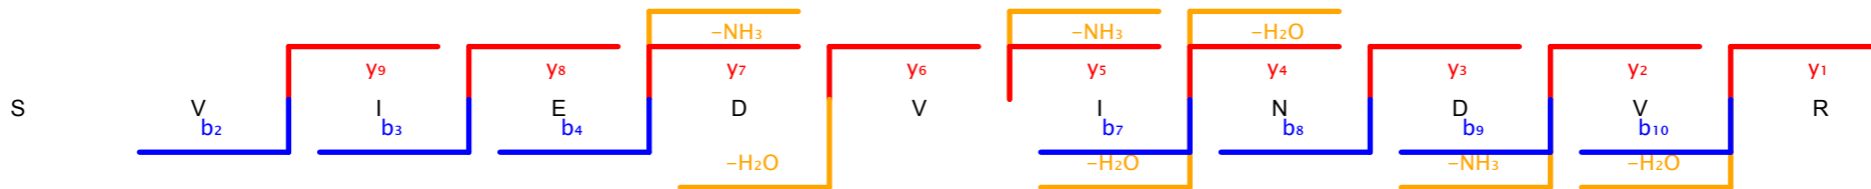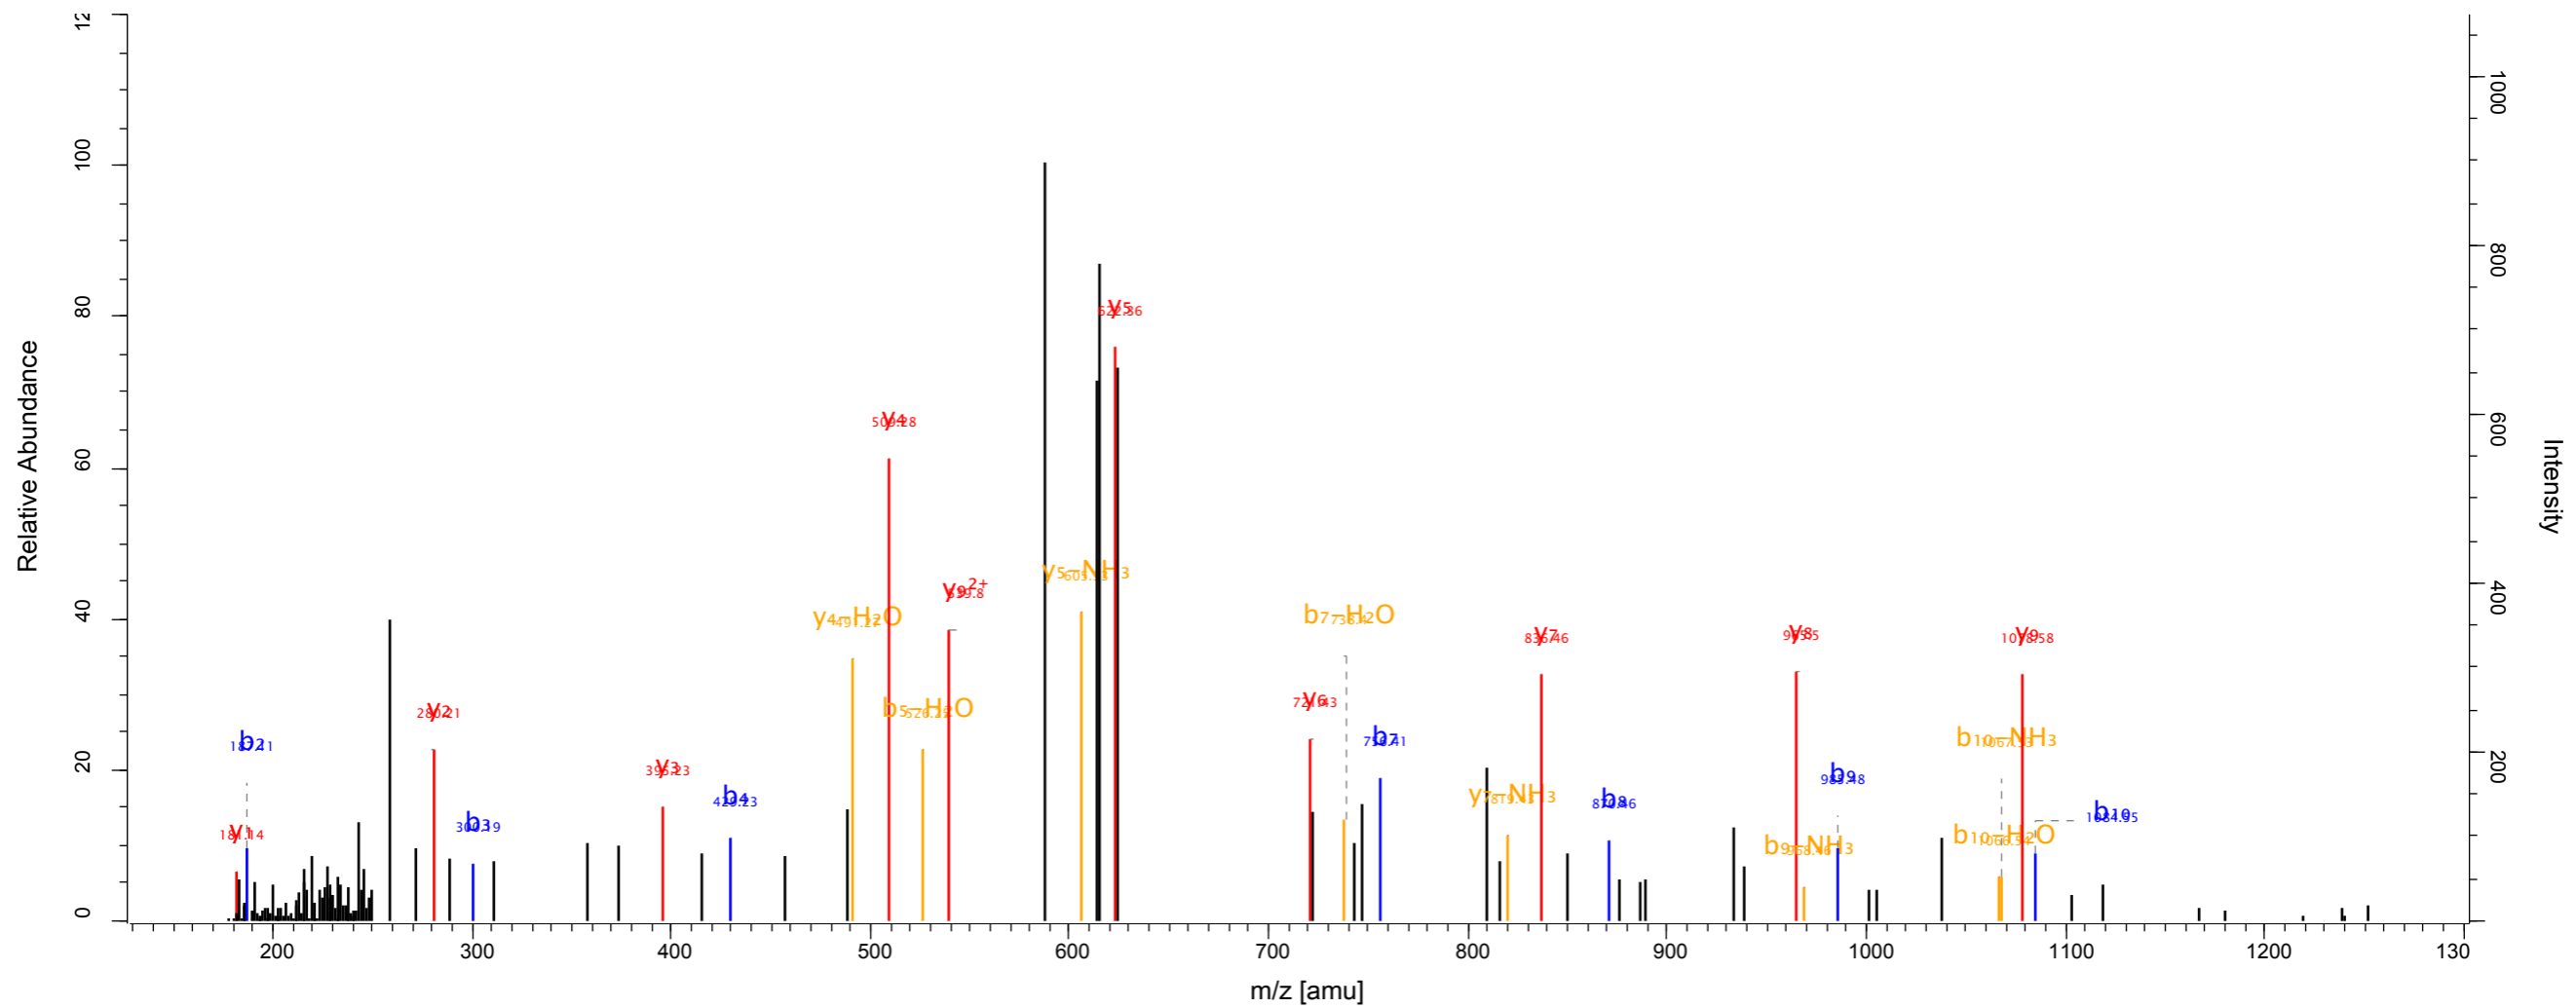

Scan number 6215 Raw file SKaraca\_LMB\_H1\_forward\_180811\_19\_rep1  
 Method ITMS; CID Pepti... 185.29

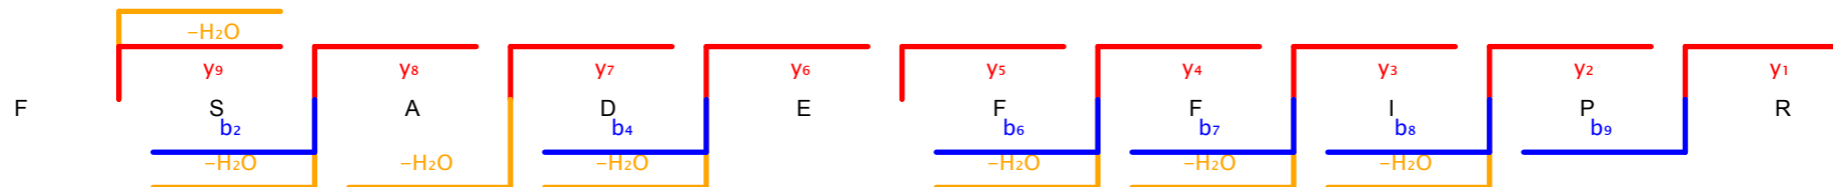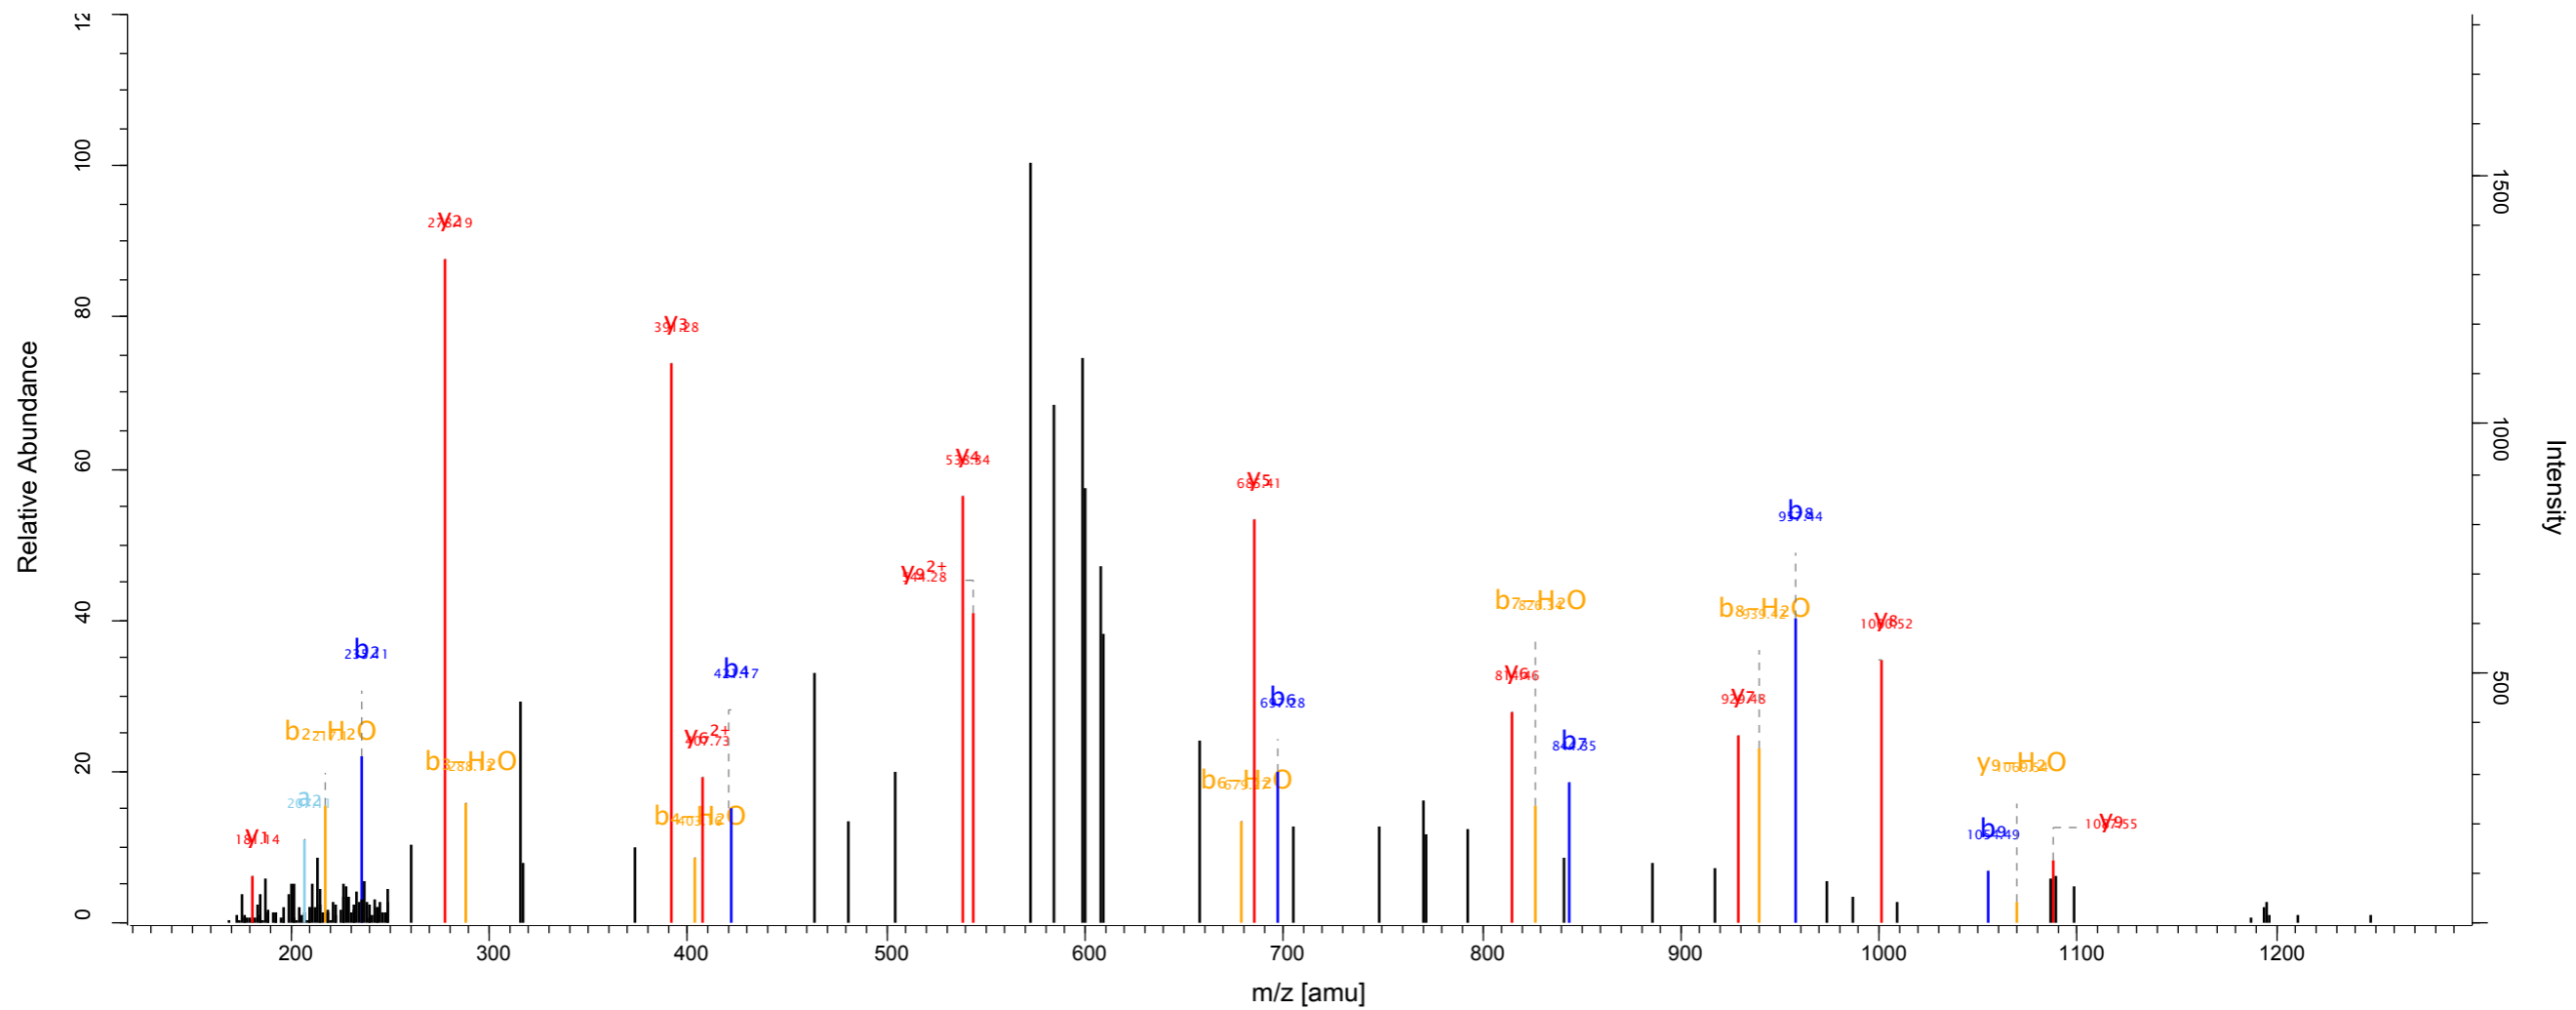

|             |           |          |                                       |
|-------------|-----------|----------|---------------------------------------|
| Scan number | 5434      | Raw file | SKaraca_LMB_H1_forward_180811_19_rep2 |
| Method      | ITMS; CID | Pepti... | 129.54                                |

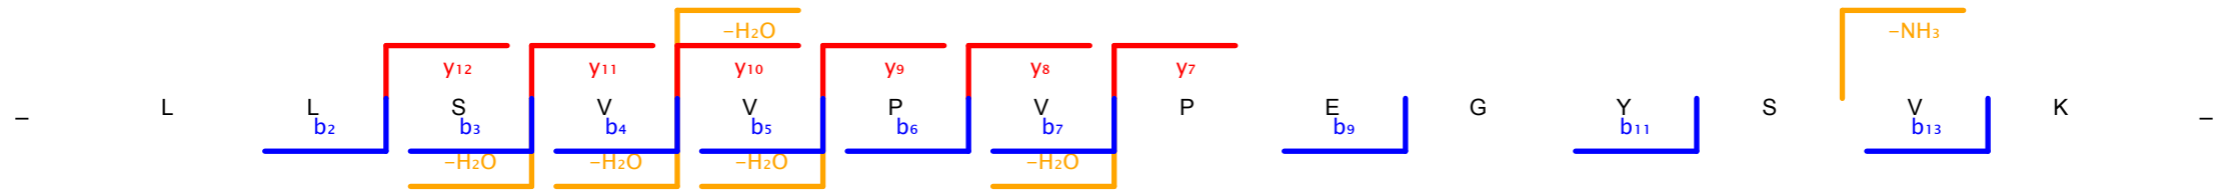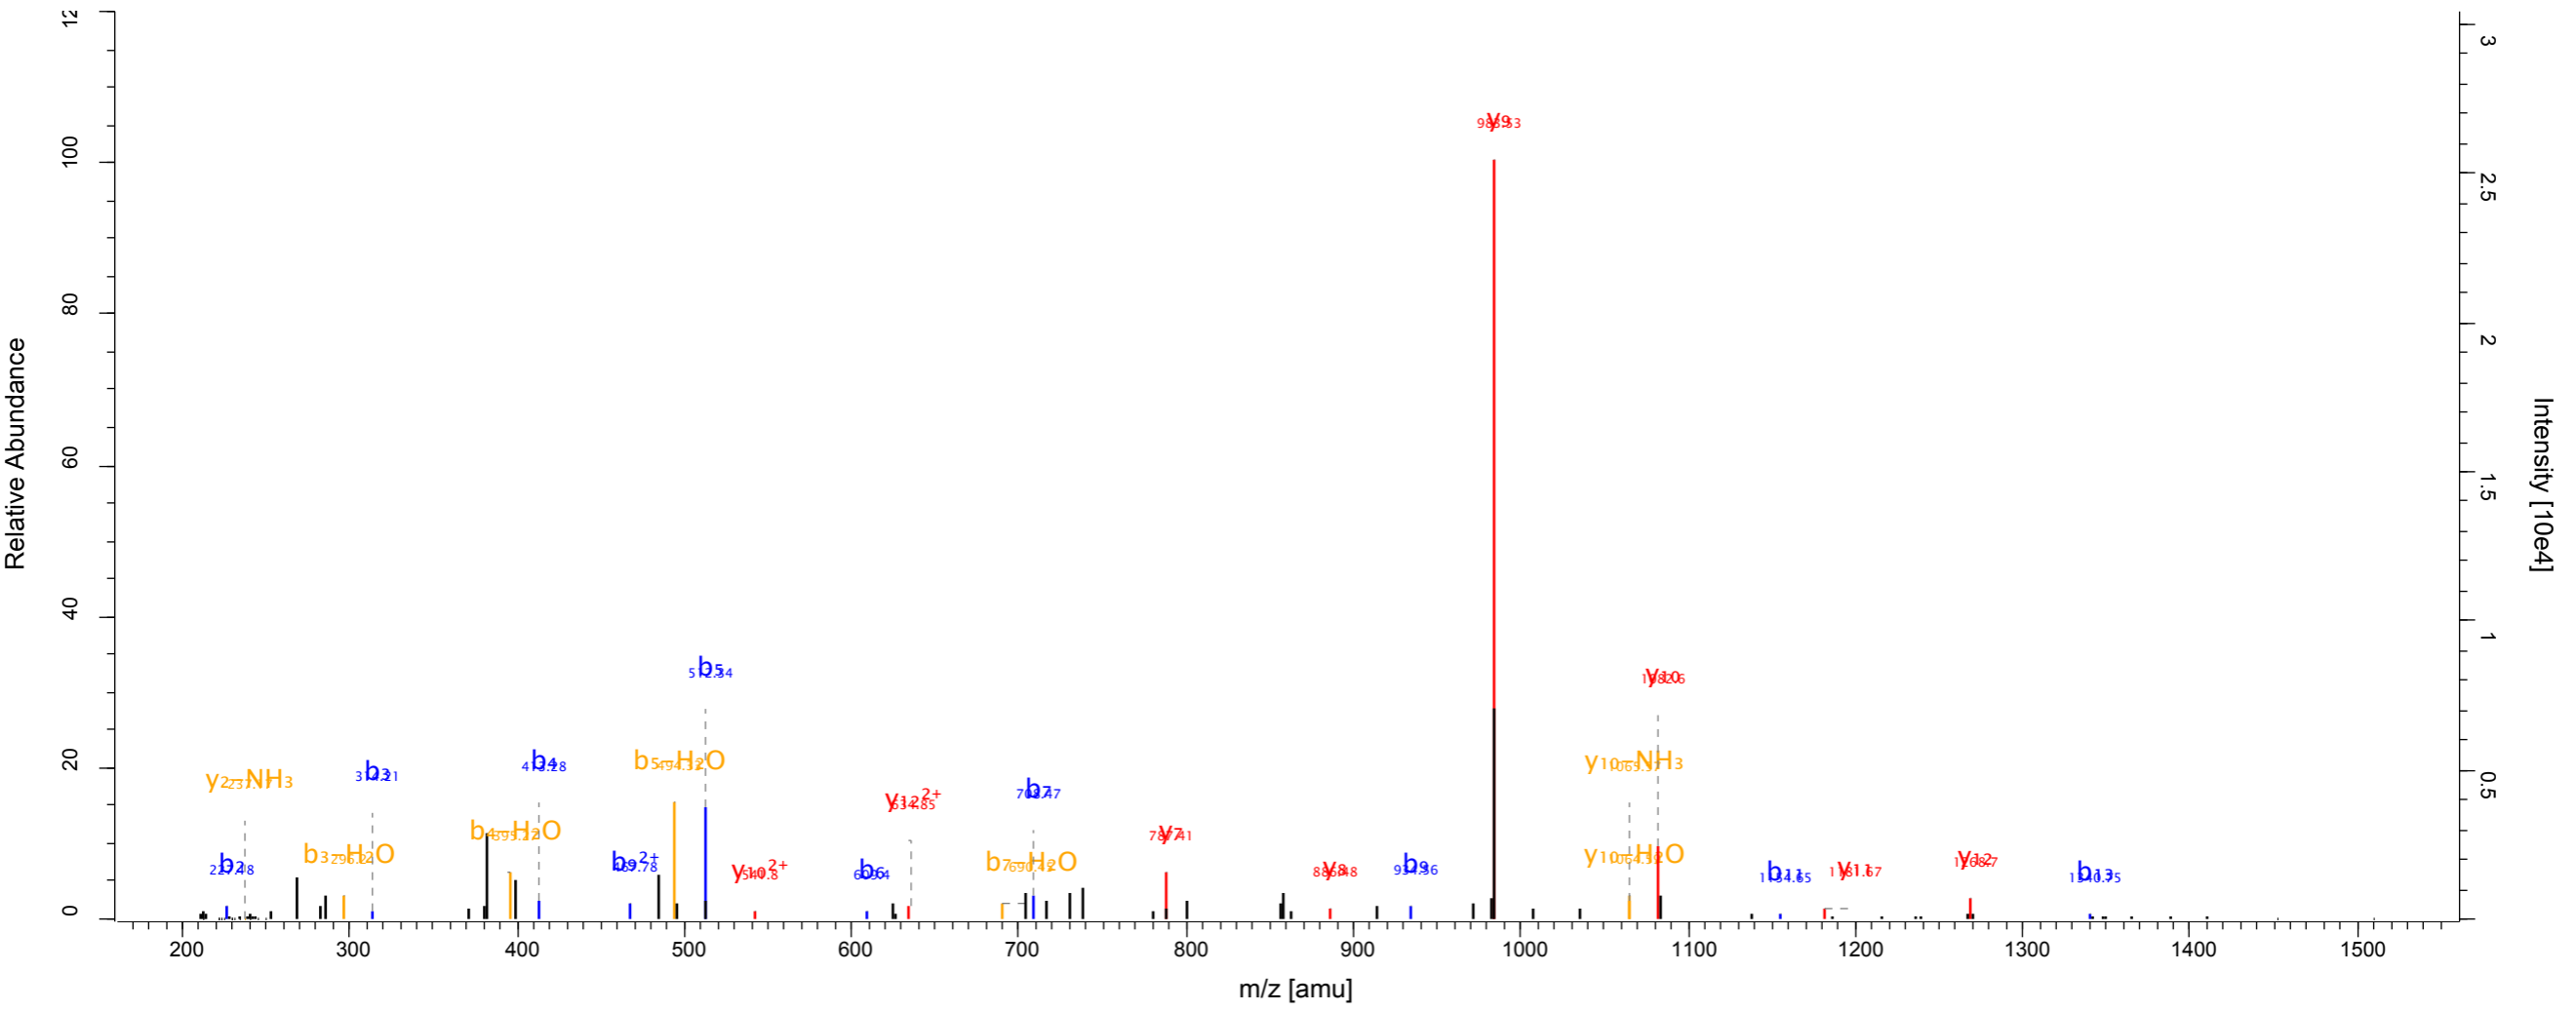

Scan number 1088 Raw file SKaraca\_LMB\_H1\_forward\_180811\_2\_rep1  
 Method ITMS; CID Pepti... 78.07

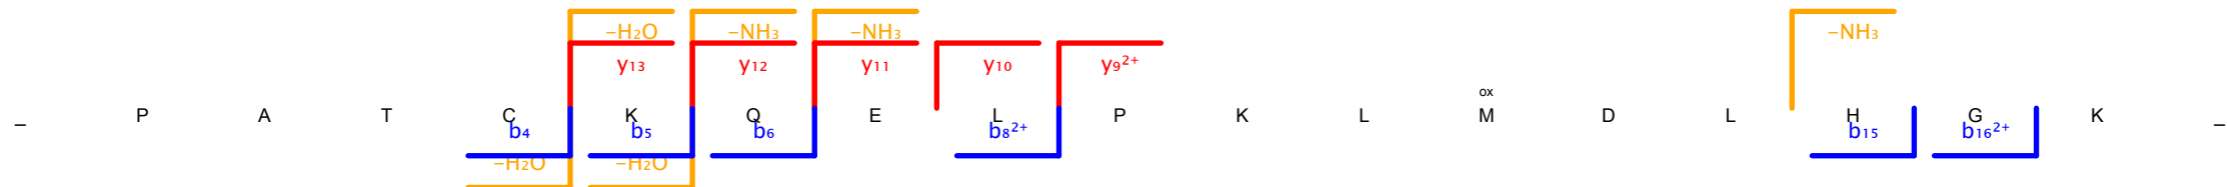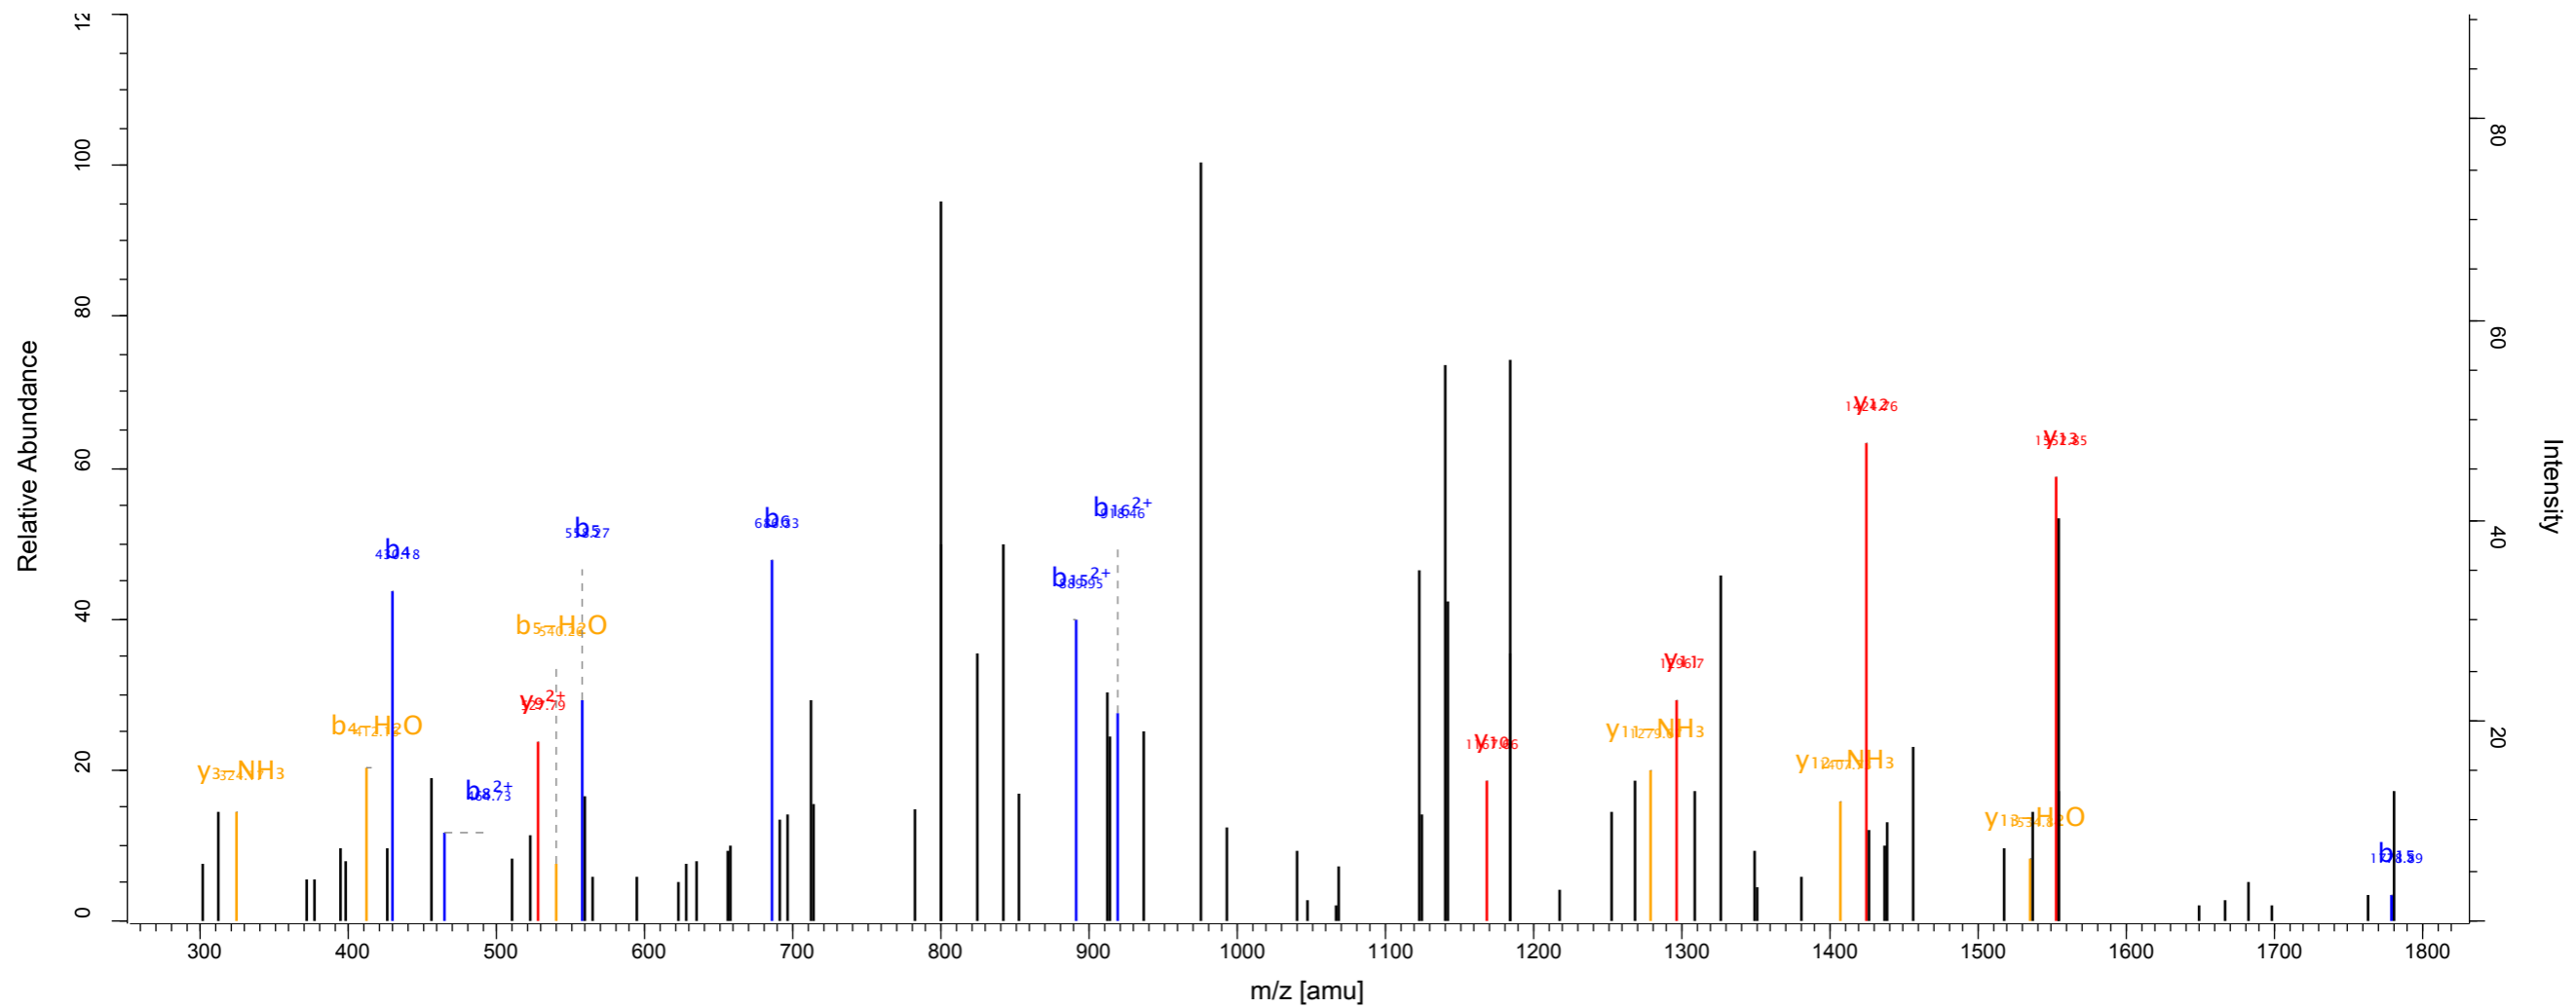

|             |           |          |                                       |
|-------------|-----------|----------|---------------------------------------|
| Scan number | 2979      | Raw file | SKaraca_LMB_H1_forward_180811_20_rep1 |
| Method      | ITMS; CID | Pepti... | 139.04                                |

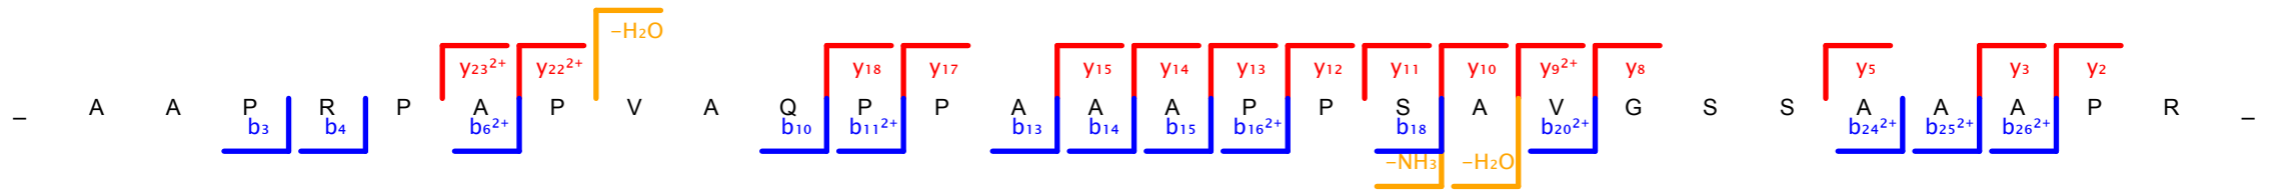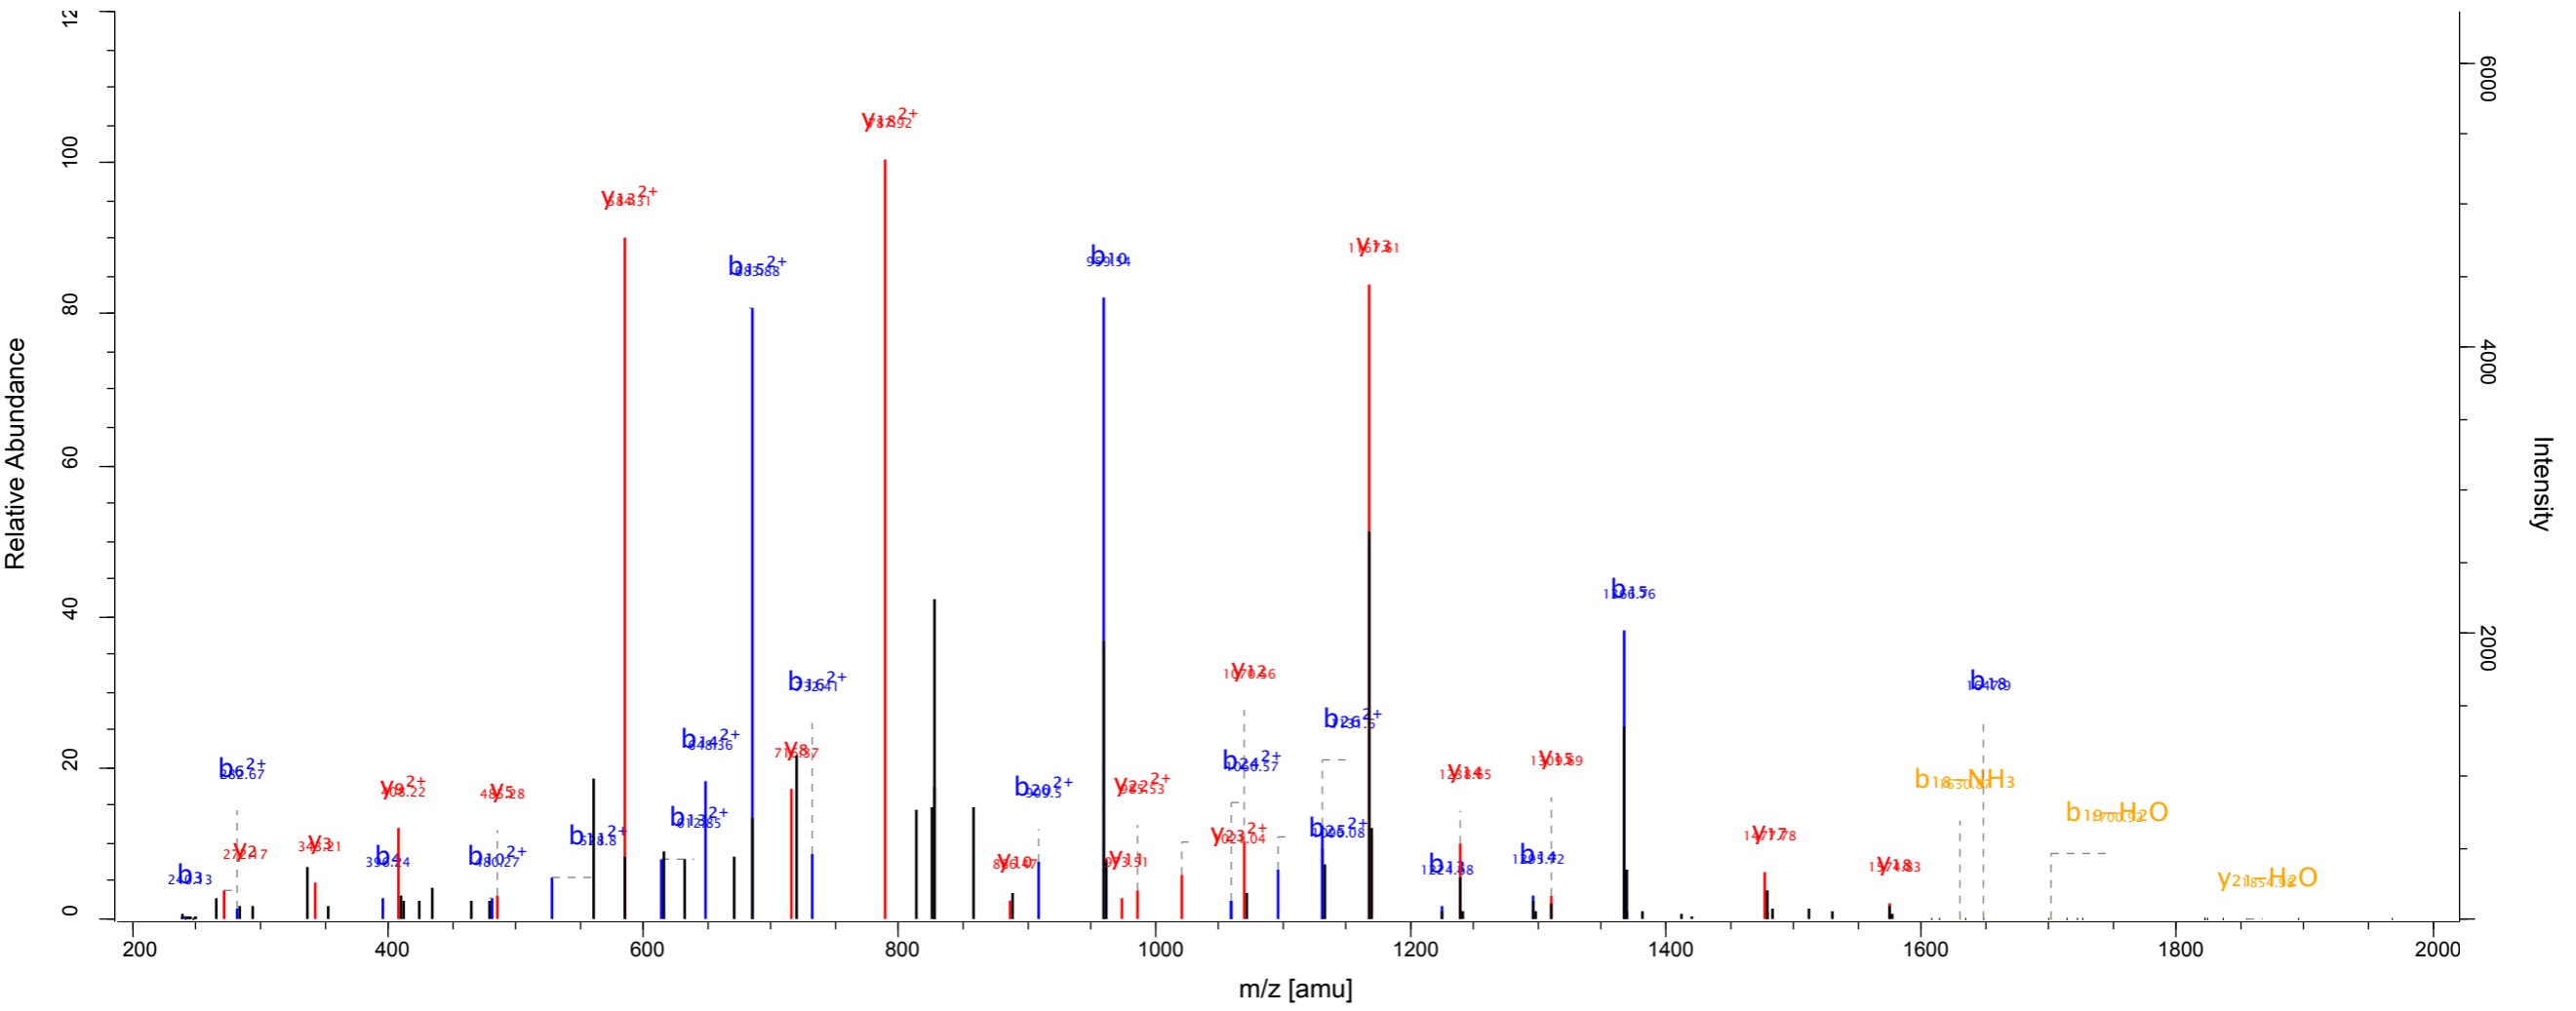

Scan number 3131 Raw file SKaraca\_LMB\_H1\_forward\_180811\_22\_rep2  
 Method ITMS; CID Pepti... 201.58

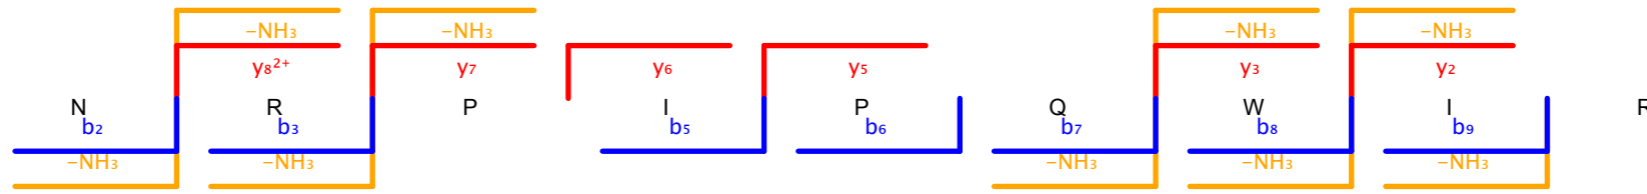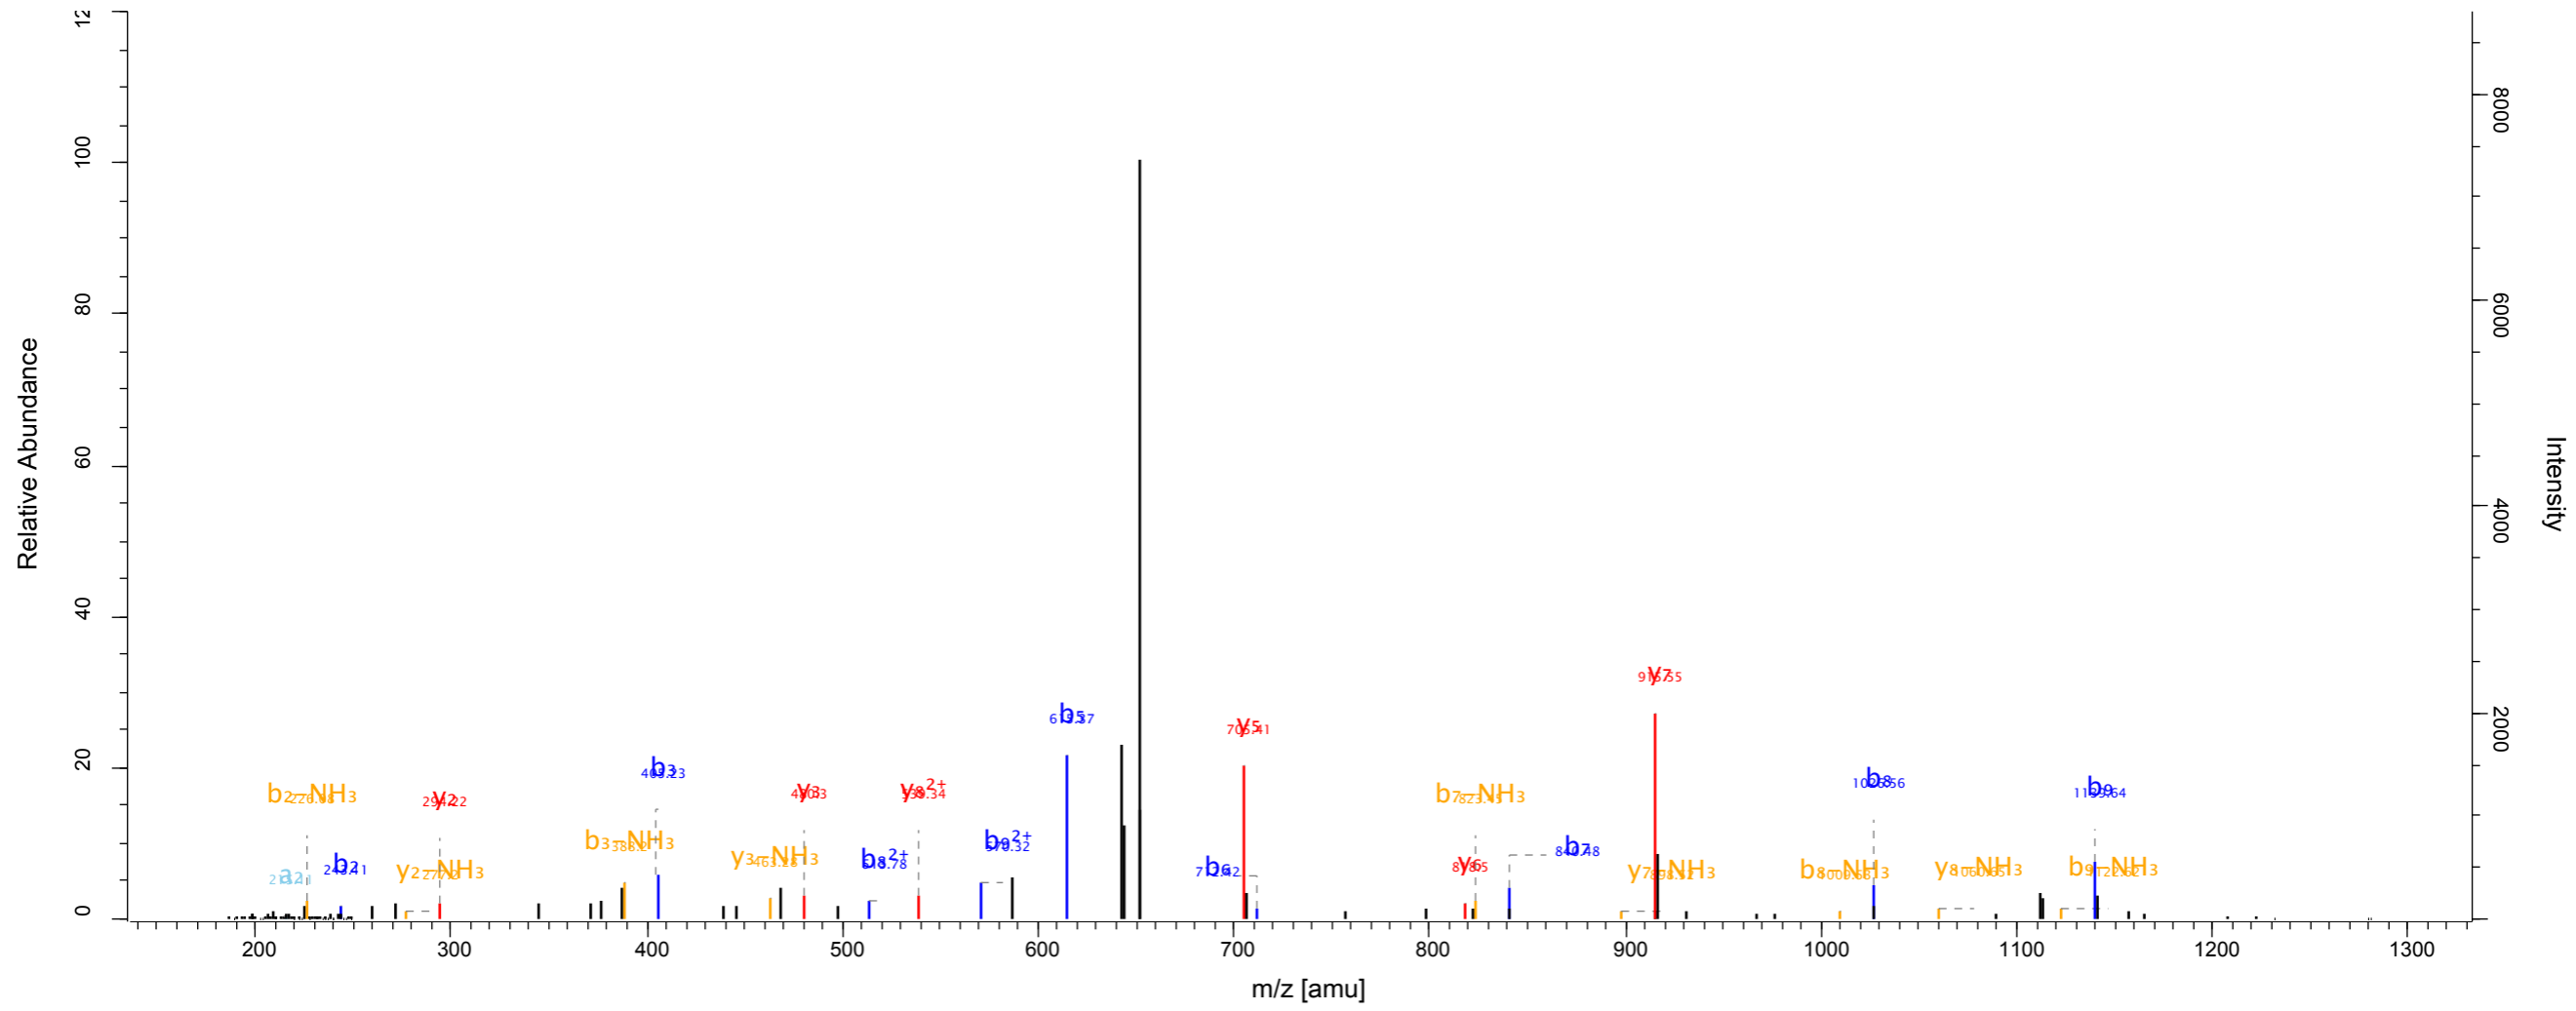

Scan number 3307 Raw file SKaraca\_LMB\_H1\_forward\_180811\_22\_rep2  
 Method ITMS; CID Pepti... 134.75

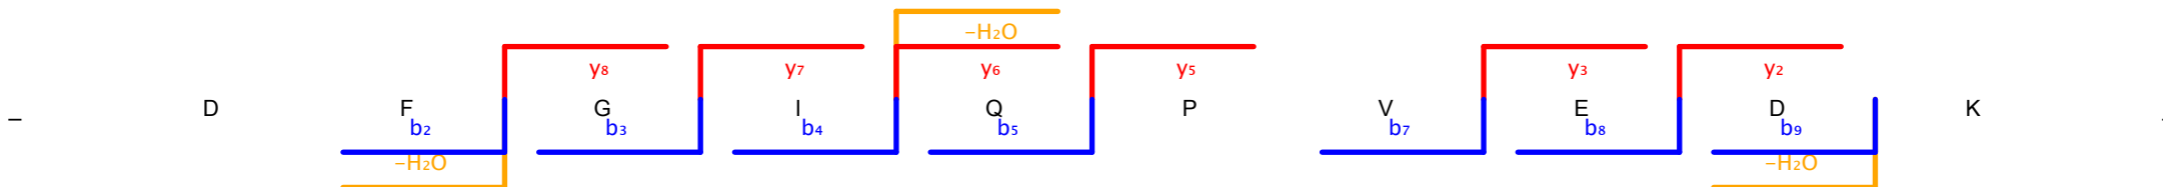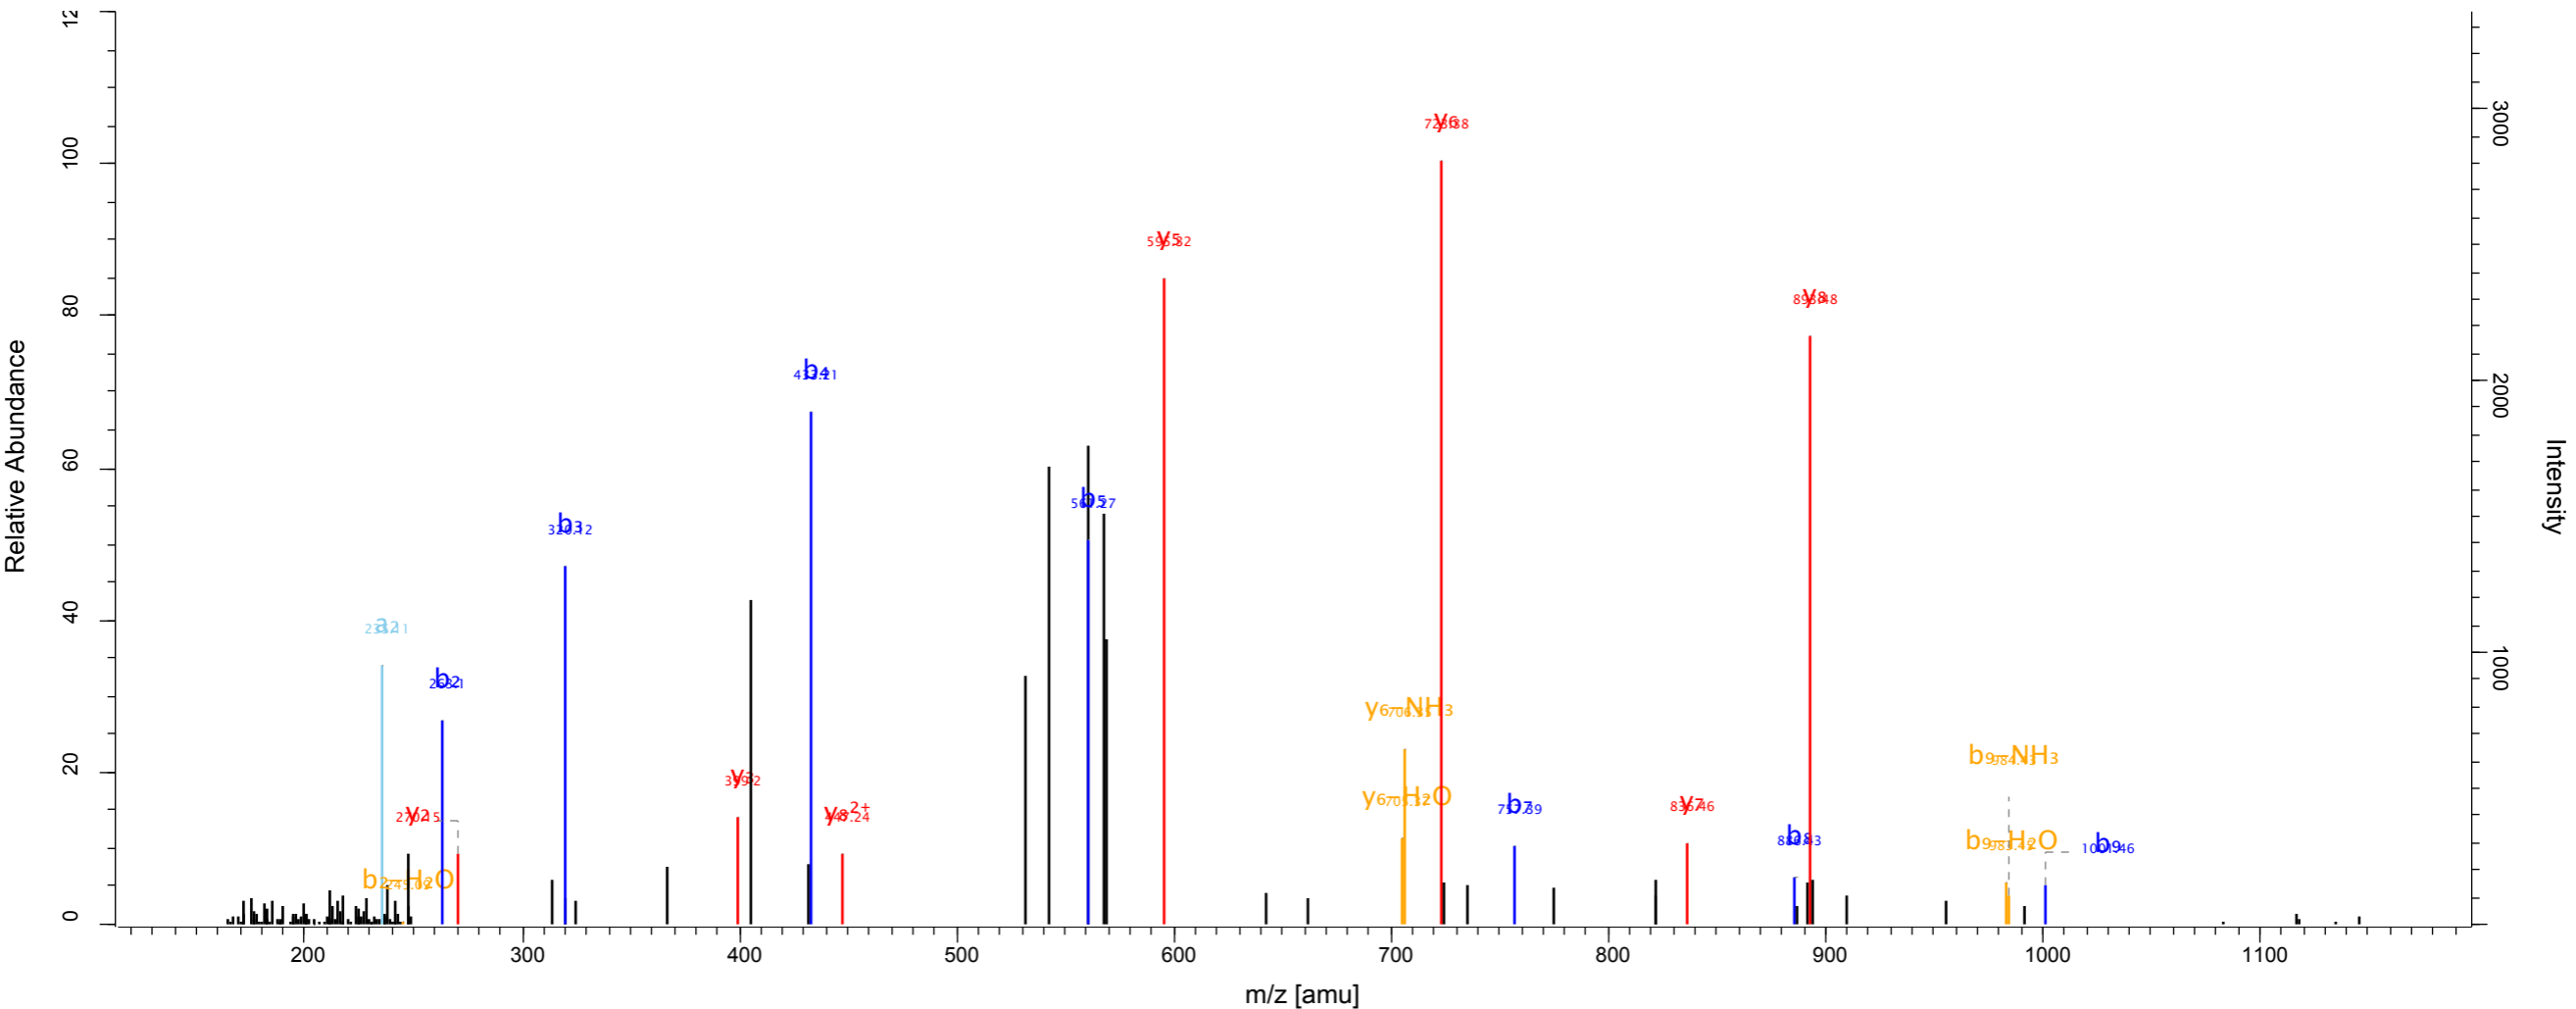



|             |           |          |                                      |
|-------------|-----------|----------|--------------------------------------|
| Scan number | 1139      | Raw file | SKaraca_LMB_H1_forward_180811_4_rep1 |
| Method      | ITMS; CID | Pepti... | 138.08                               |

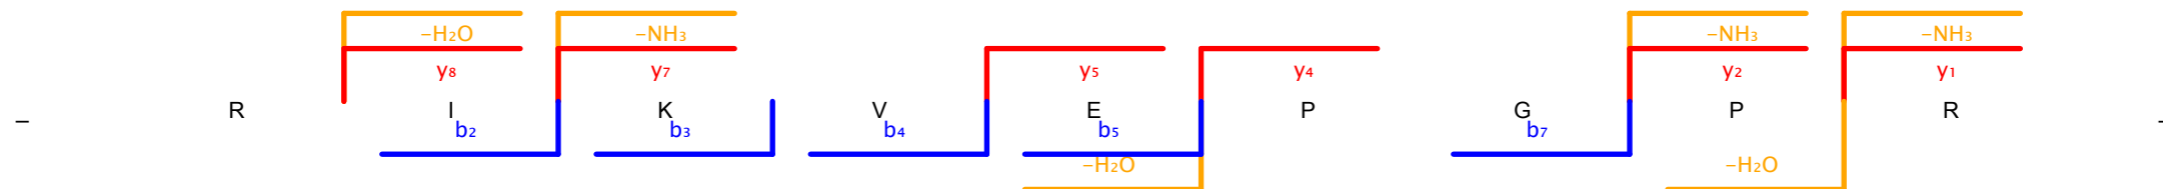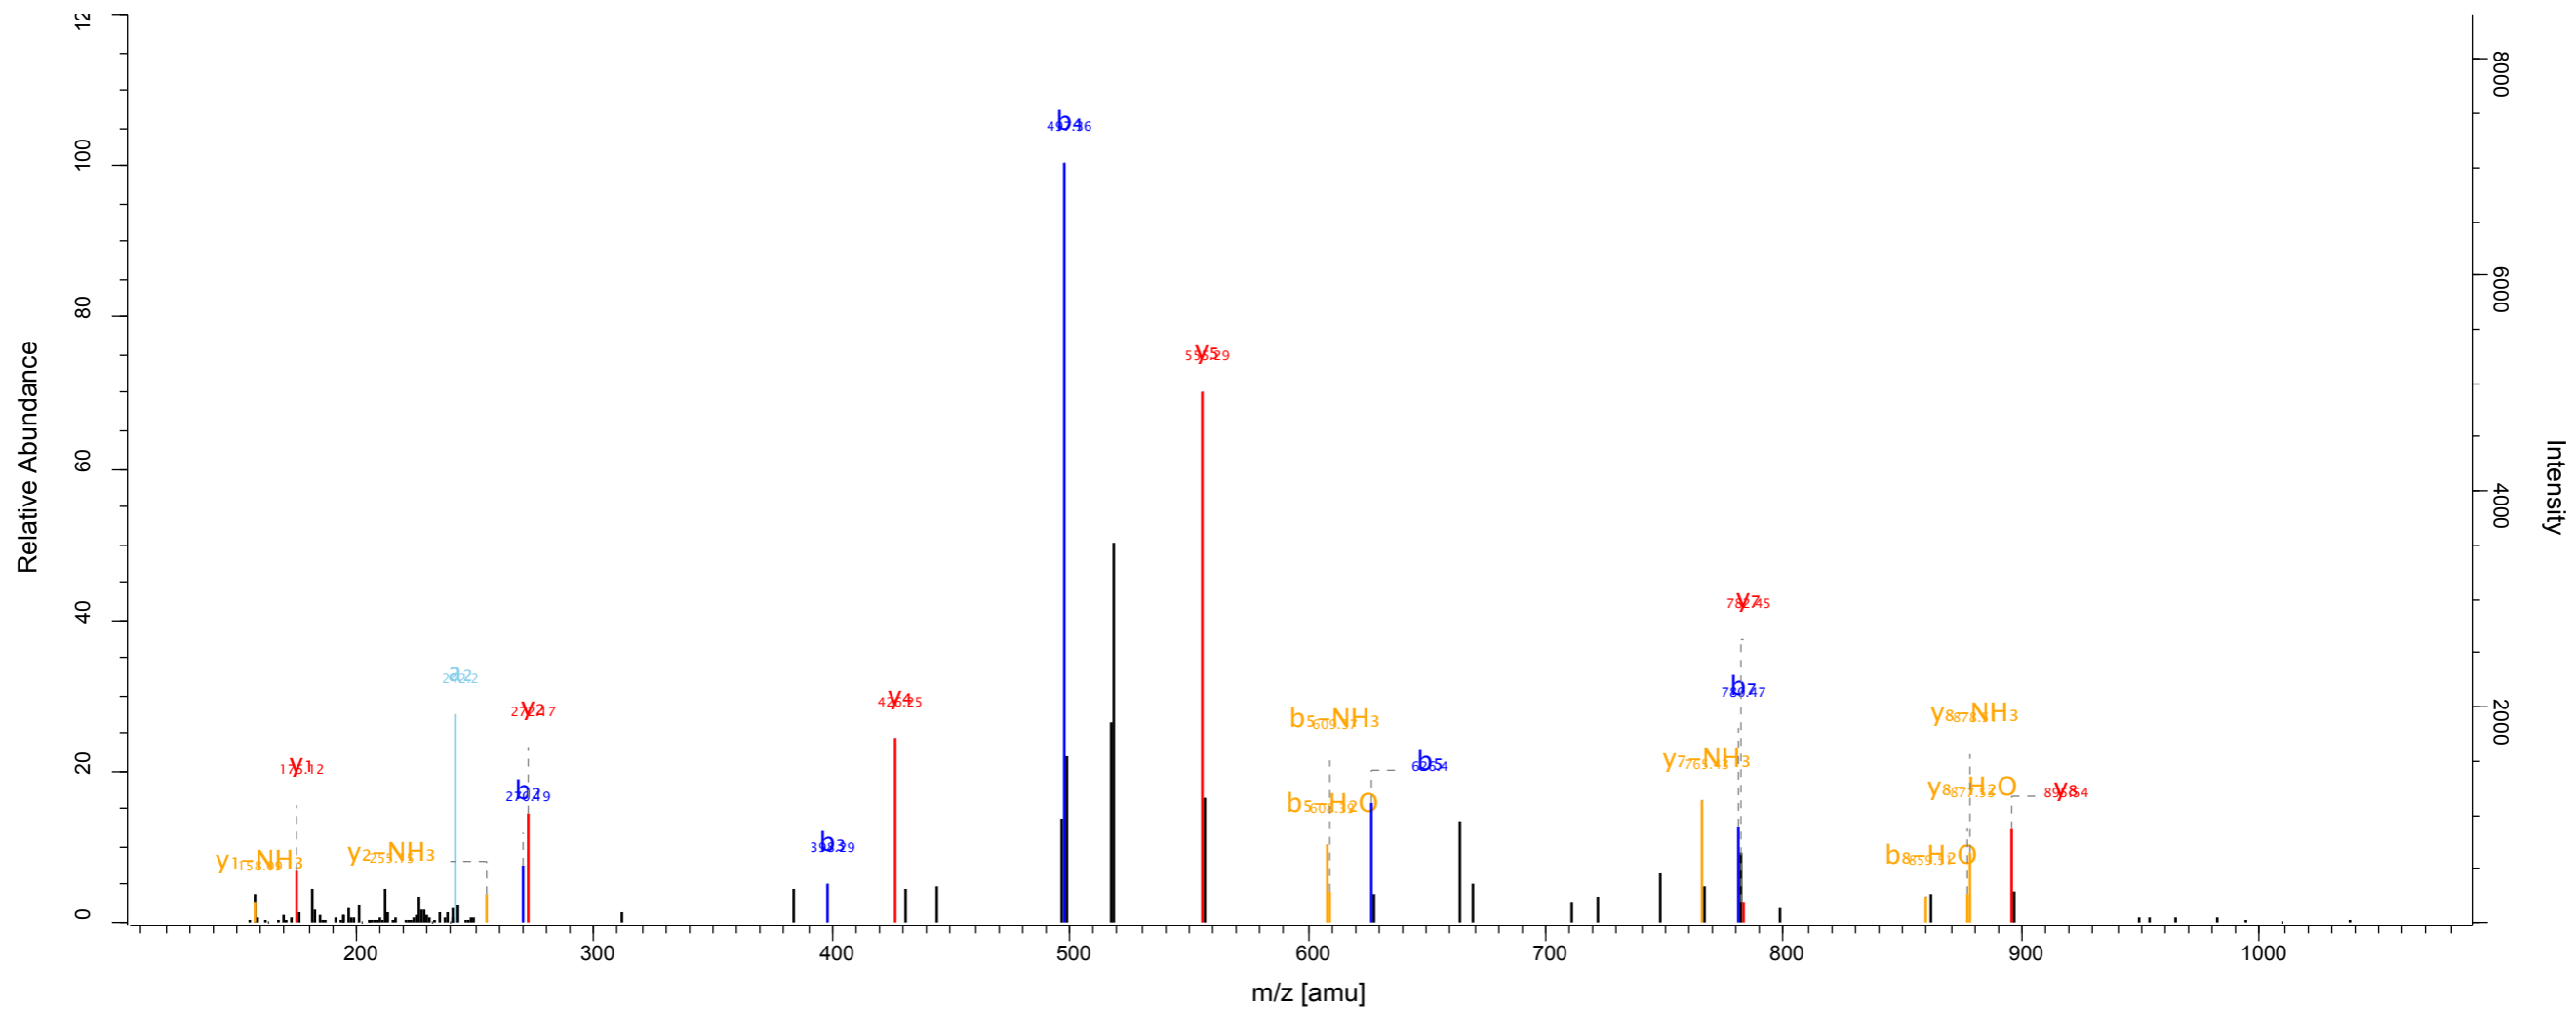

Scan number 846 Raw file SKaraca\_LMB\_H1\_forward\_180811\_7\_rep1  
 Method ITMS; CID Pepti... 127.57

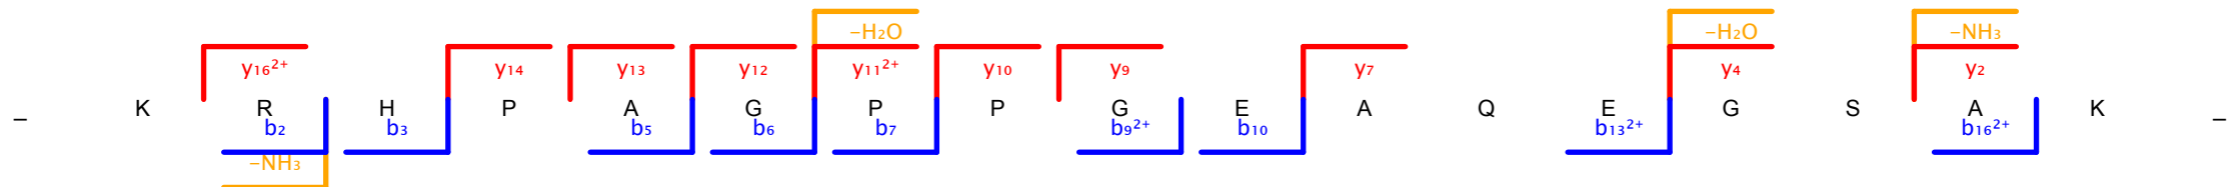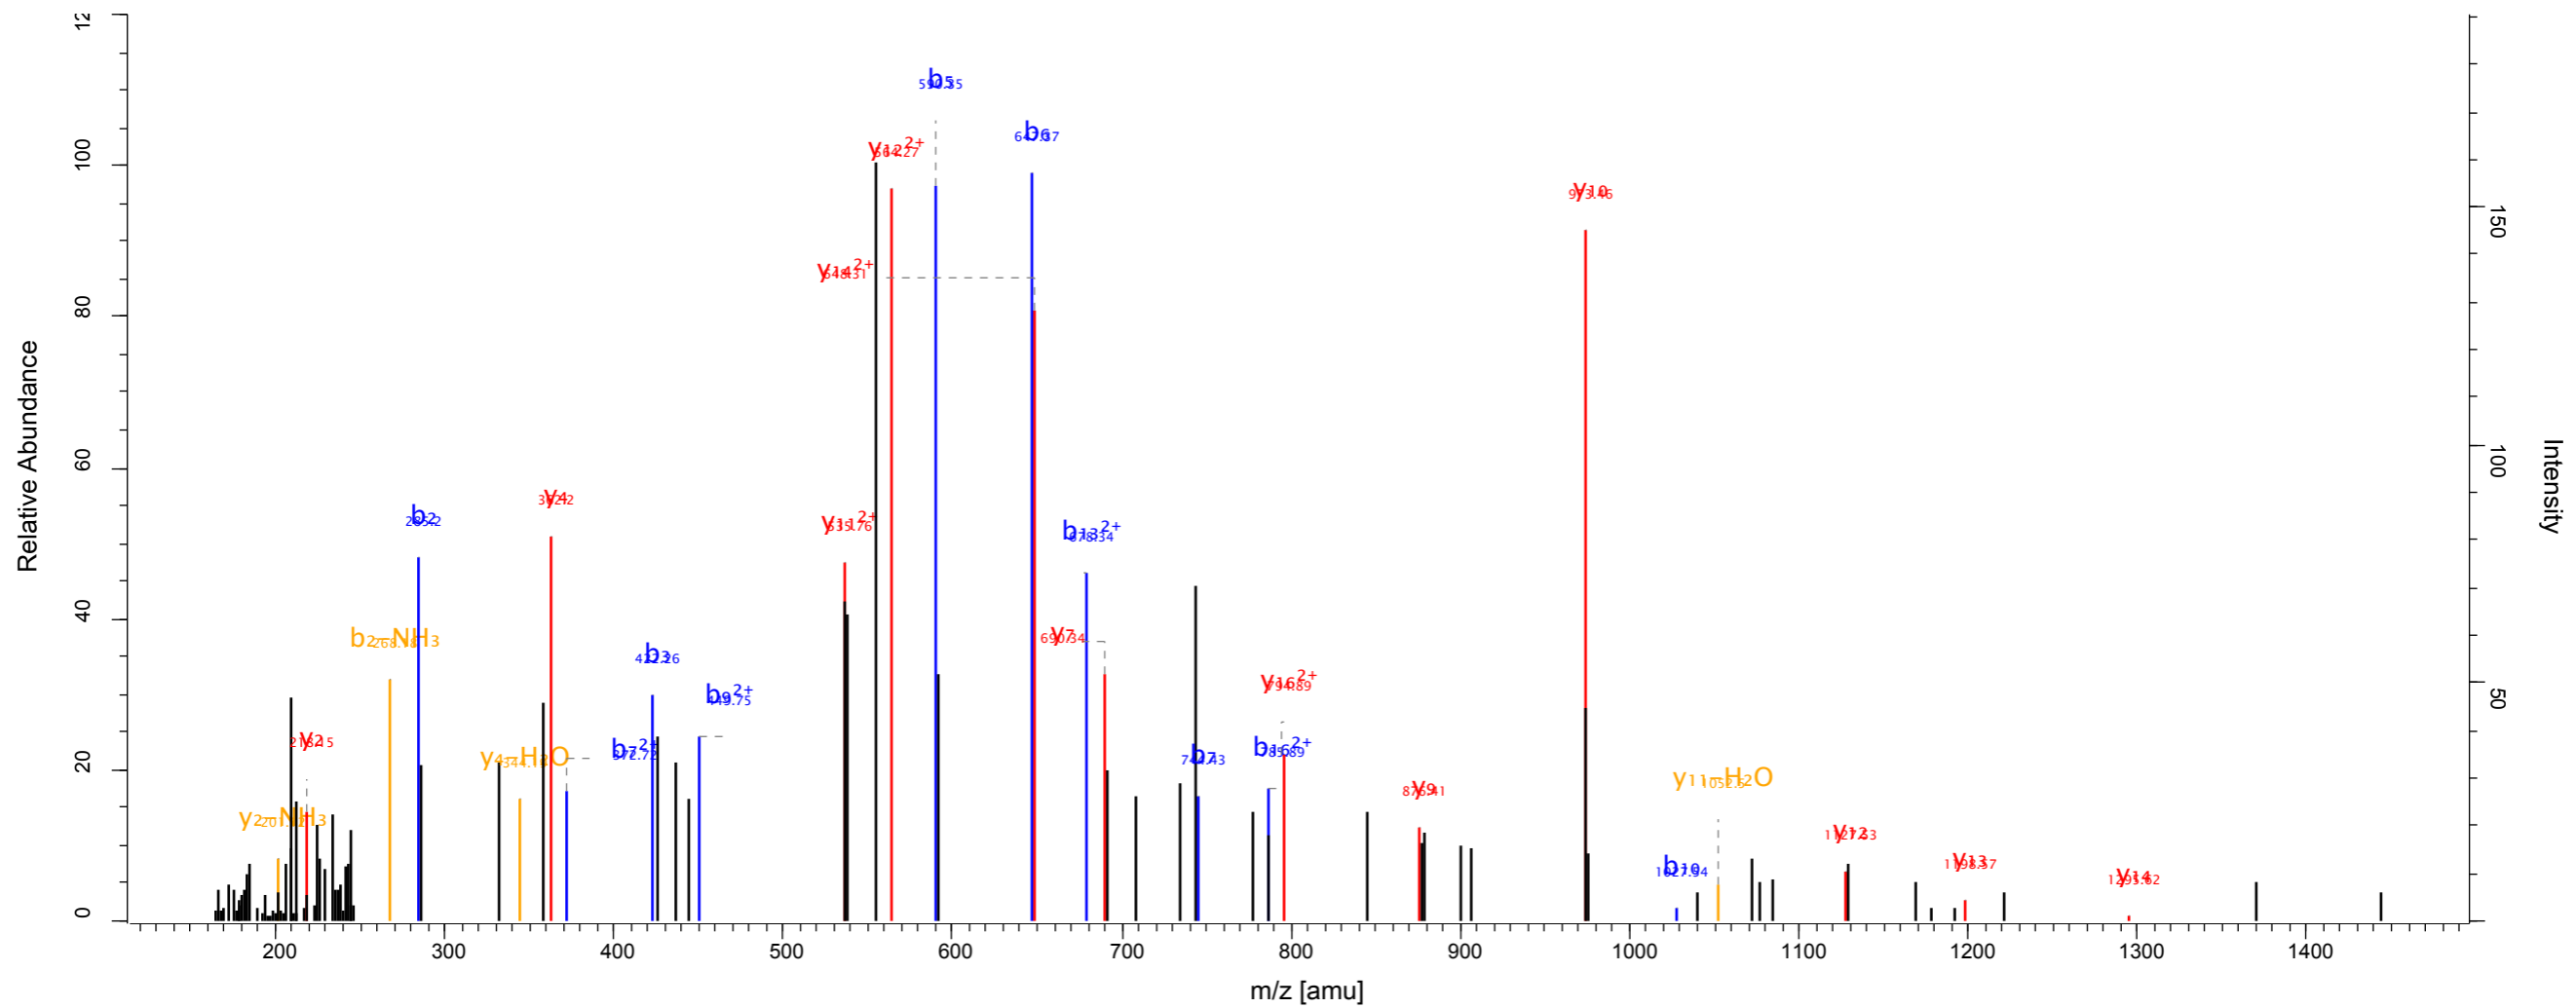

Scan number 992 Raw file SKaraca\_LMB\_H1\_forward\_180811\_7\_rep1  
 Method ITMS; CID Pepti... 103.08

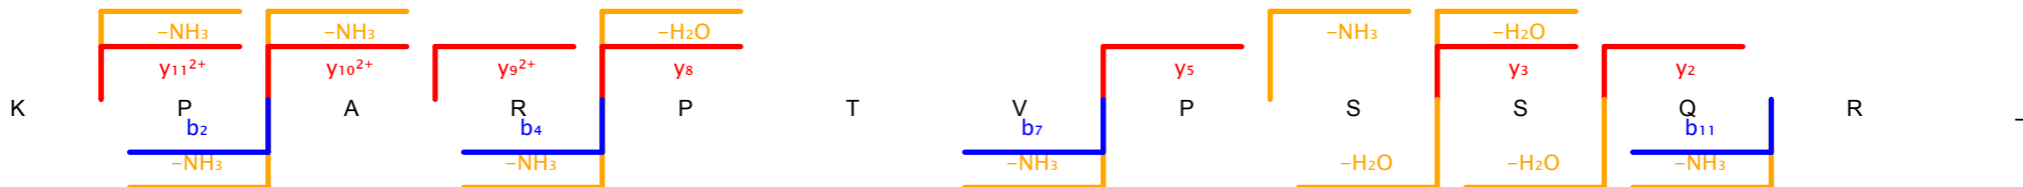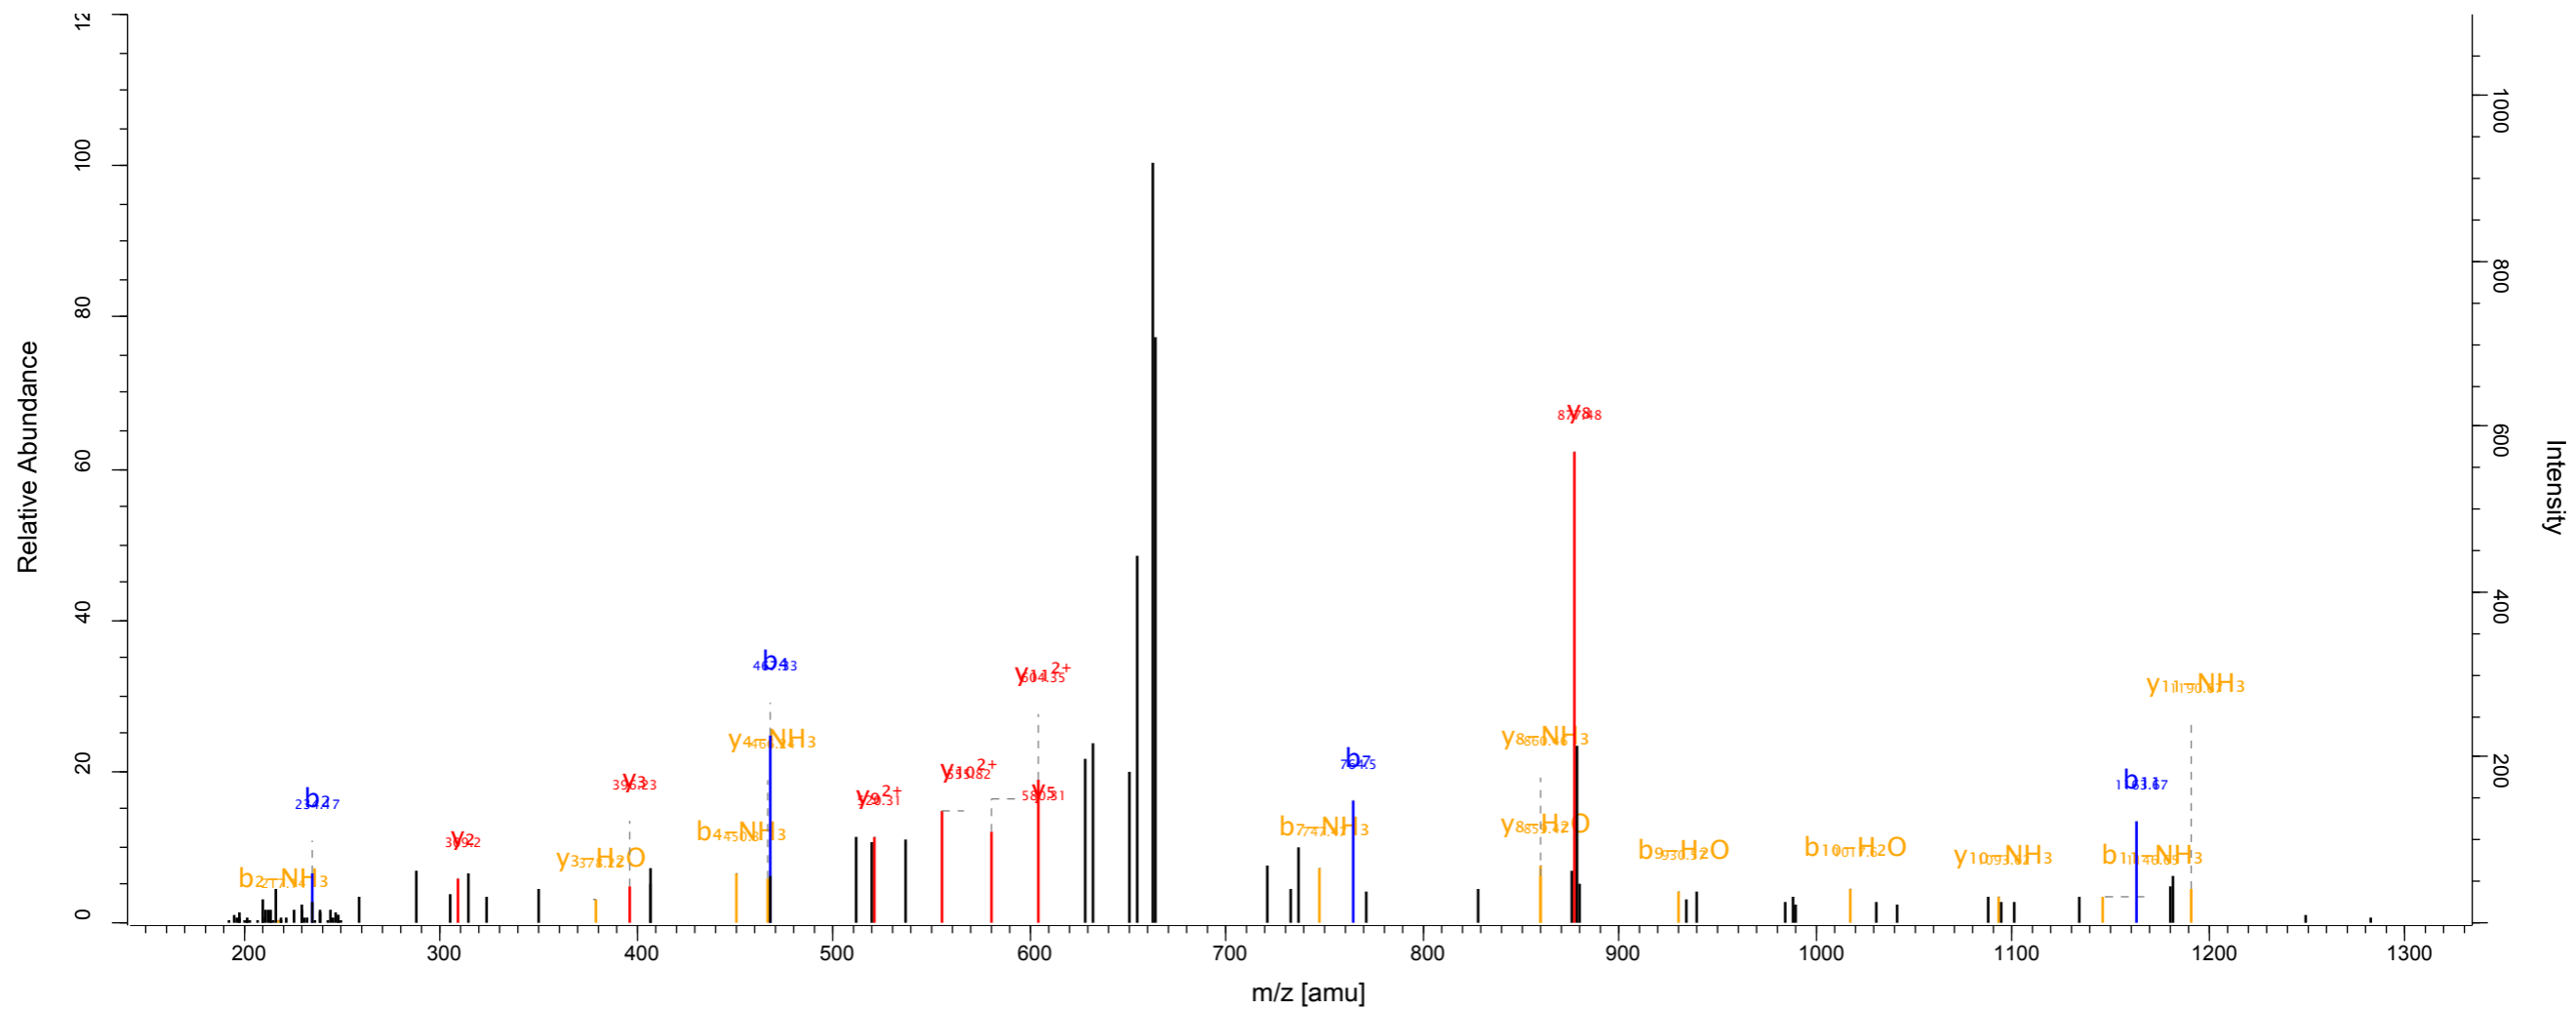

Scan number 6840 Raw file SKaraca\_LMB\_H1\_forward\_180811\_8\_rep1  
 Method ITMS; CID Pepti... 120.87

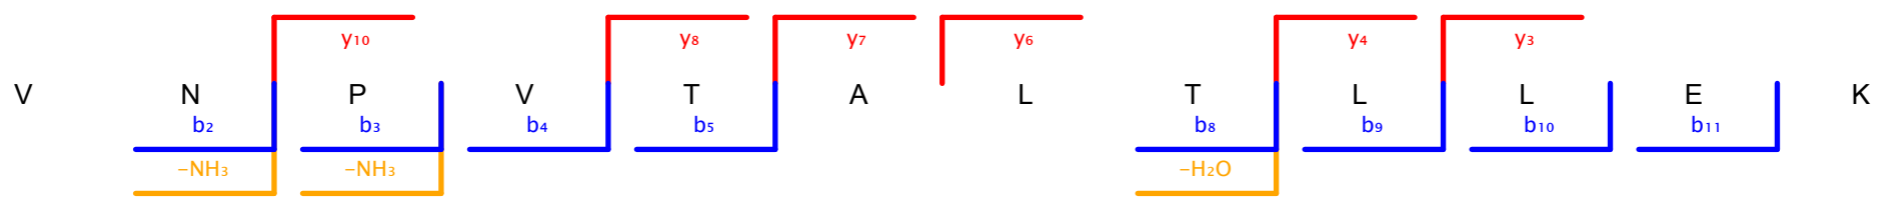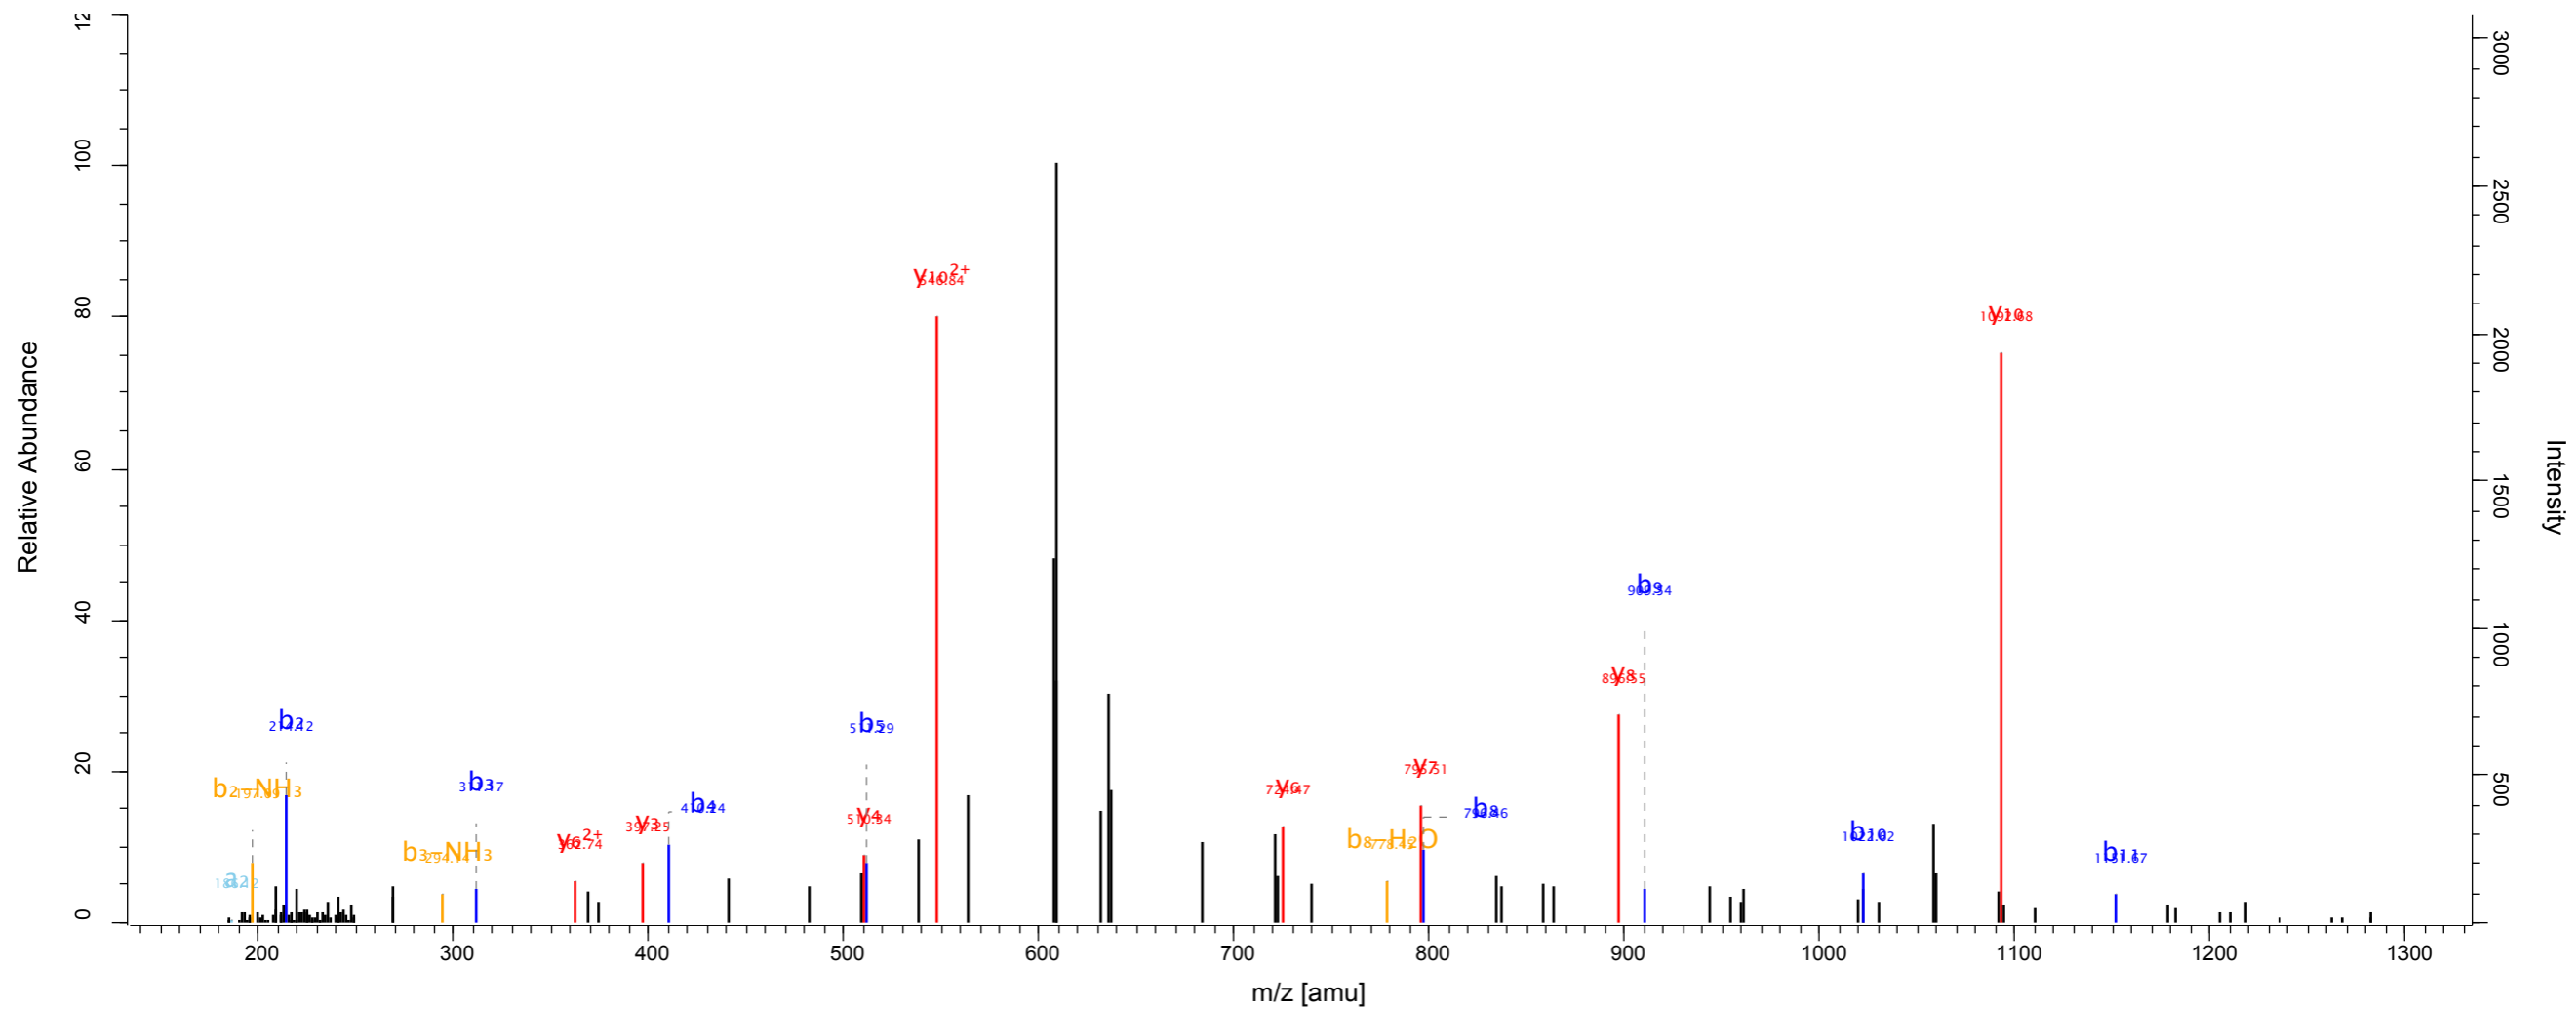

Scan number 3457 Raw file SKaraca\_LMB\_H1\_Reverse\_041011\_1\_rep1  
 Method ITMS; CID Pepti... 131.17

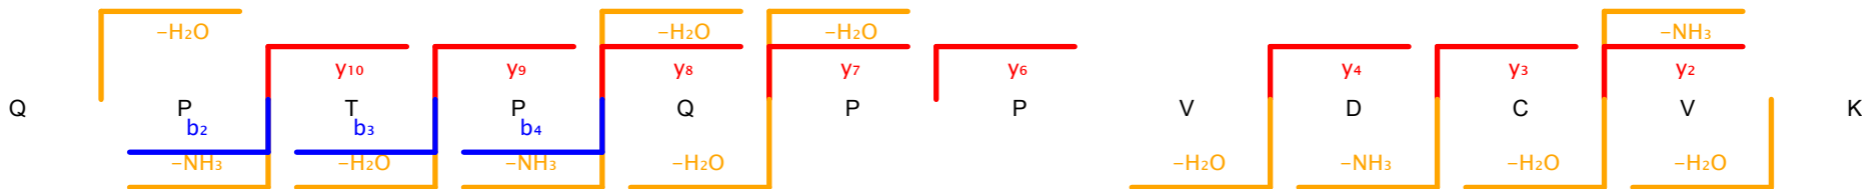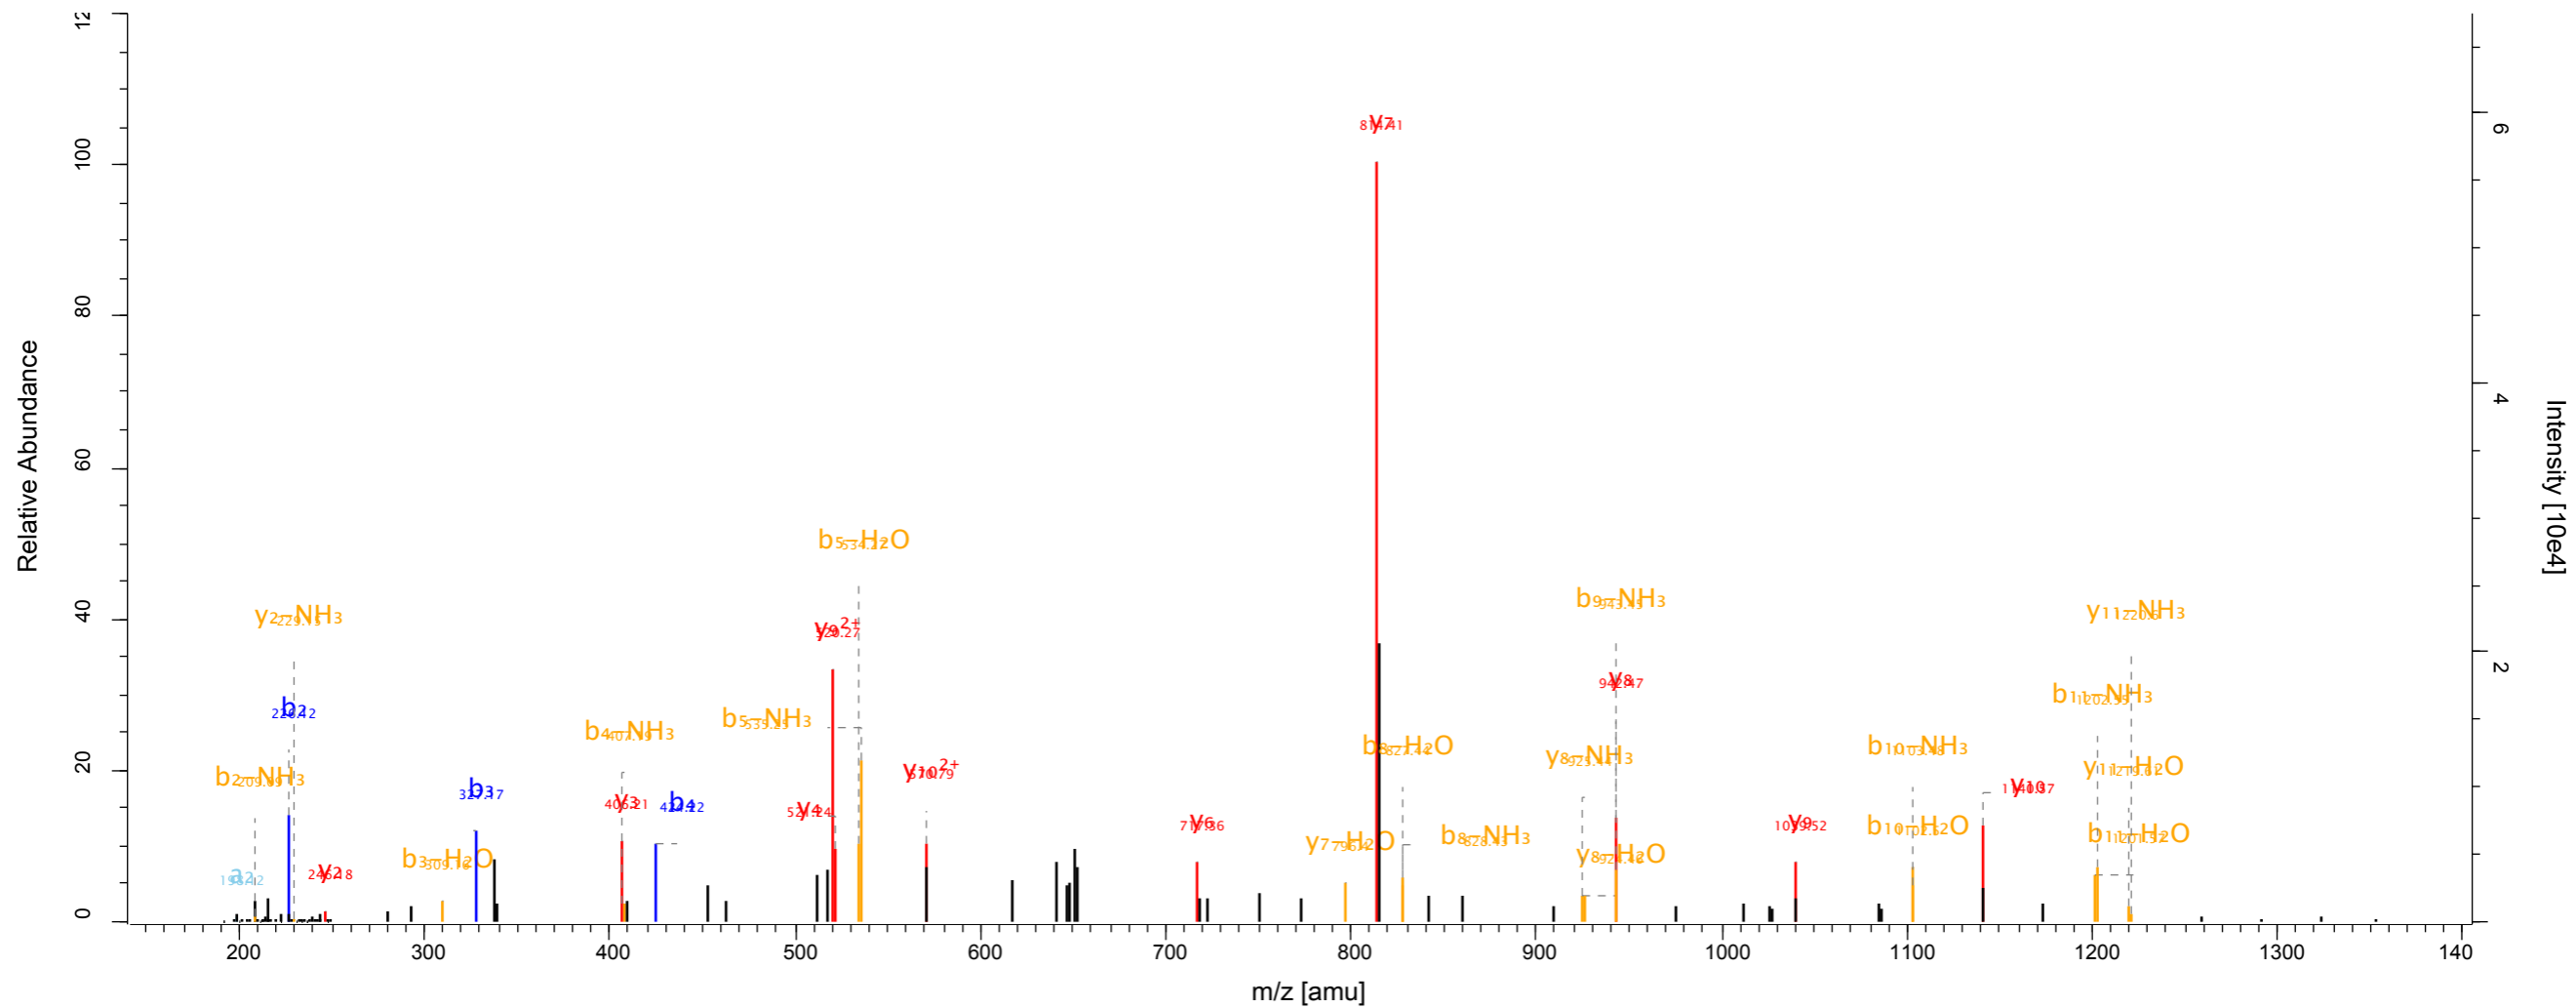

Scan number 3565 Raw file SKaraca\_LMB\_H1\_Reverse\_041011\_1\_rep1  
 Method ITMS; CID Pepti... 209.6

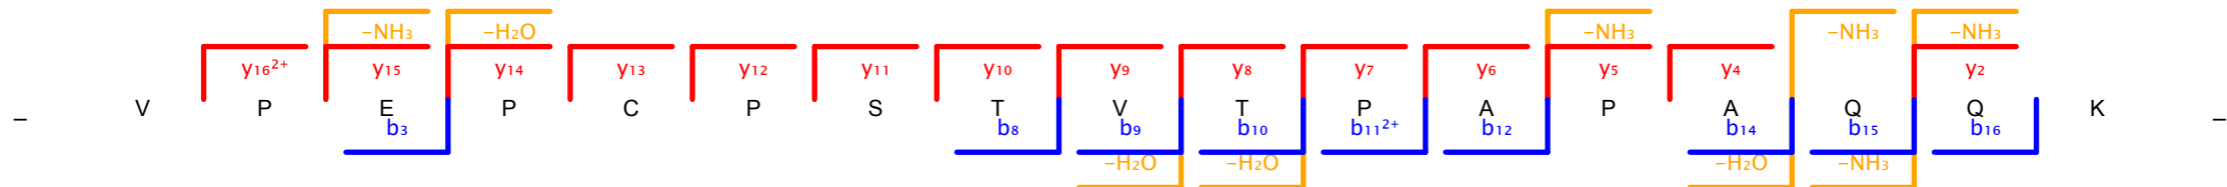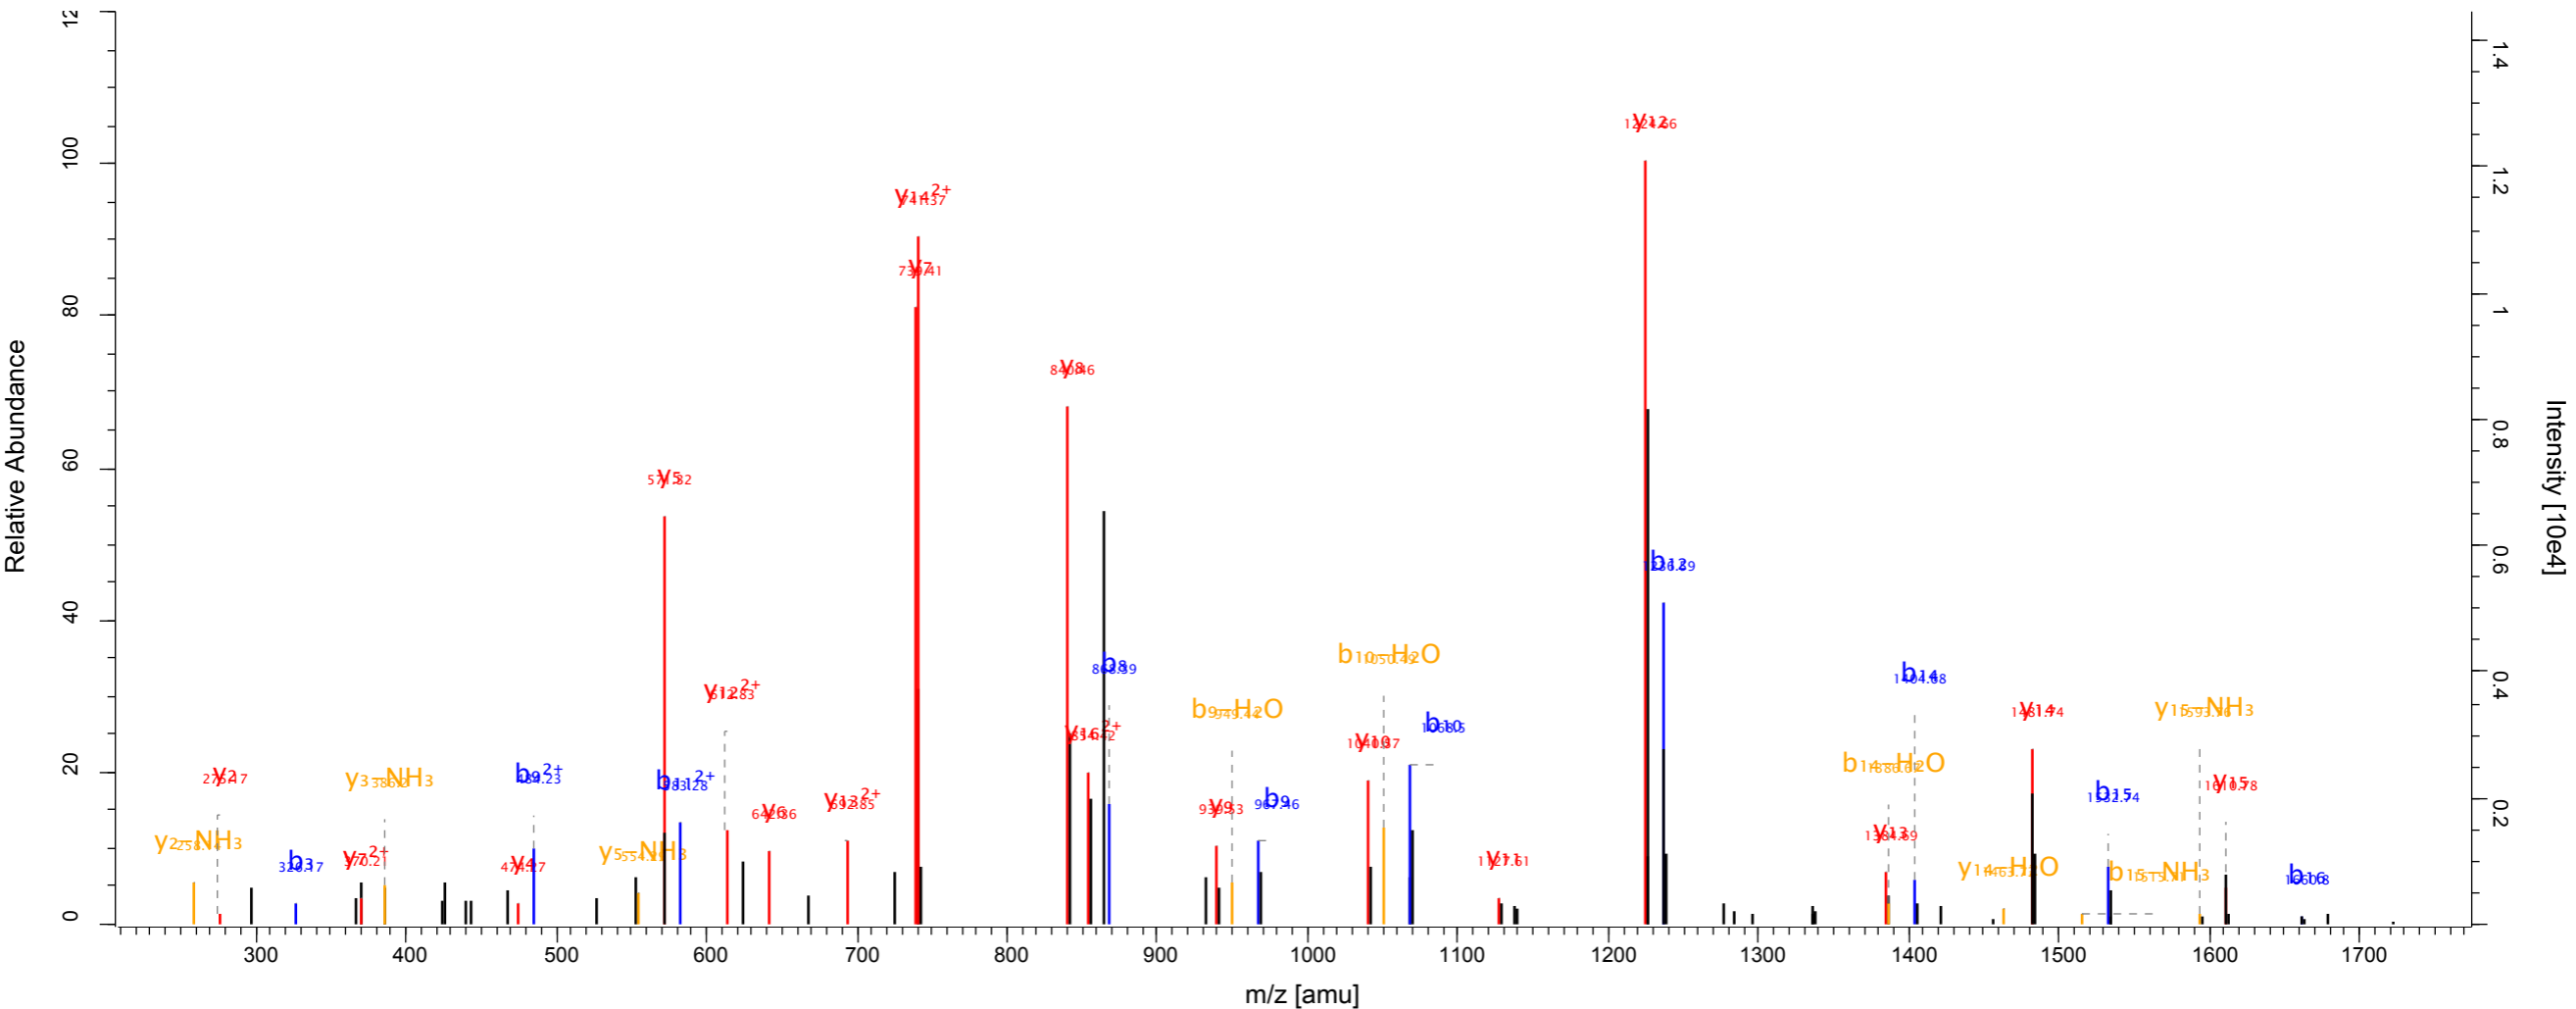

|             |           |          |                                      |
|-------------|-----------|----------|--------------------------------------|
| Scan number | 7943      | Raw file | SKaraca_LMB_H1_Reverse_041011_1_rep1 |
| Method      | ITMS; CID | Pepti... | 138.24                               |

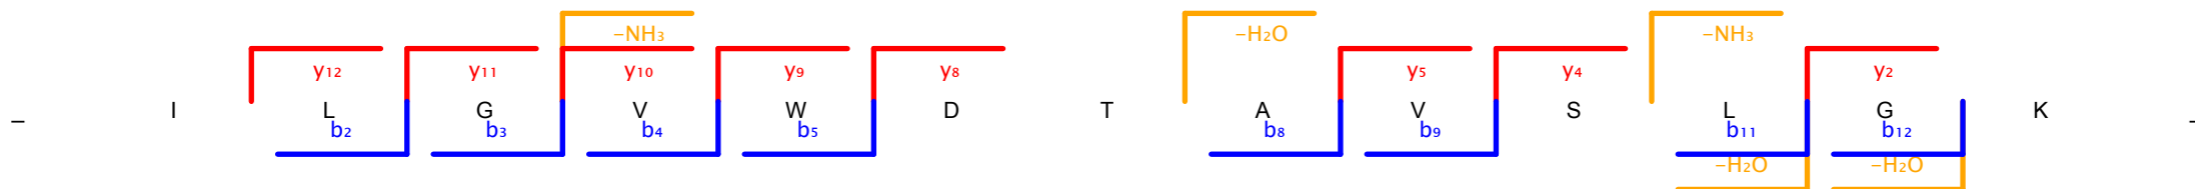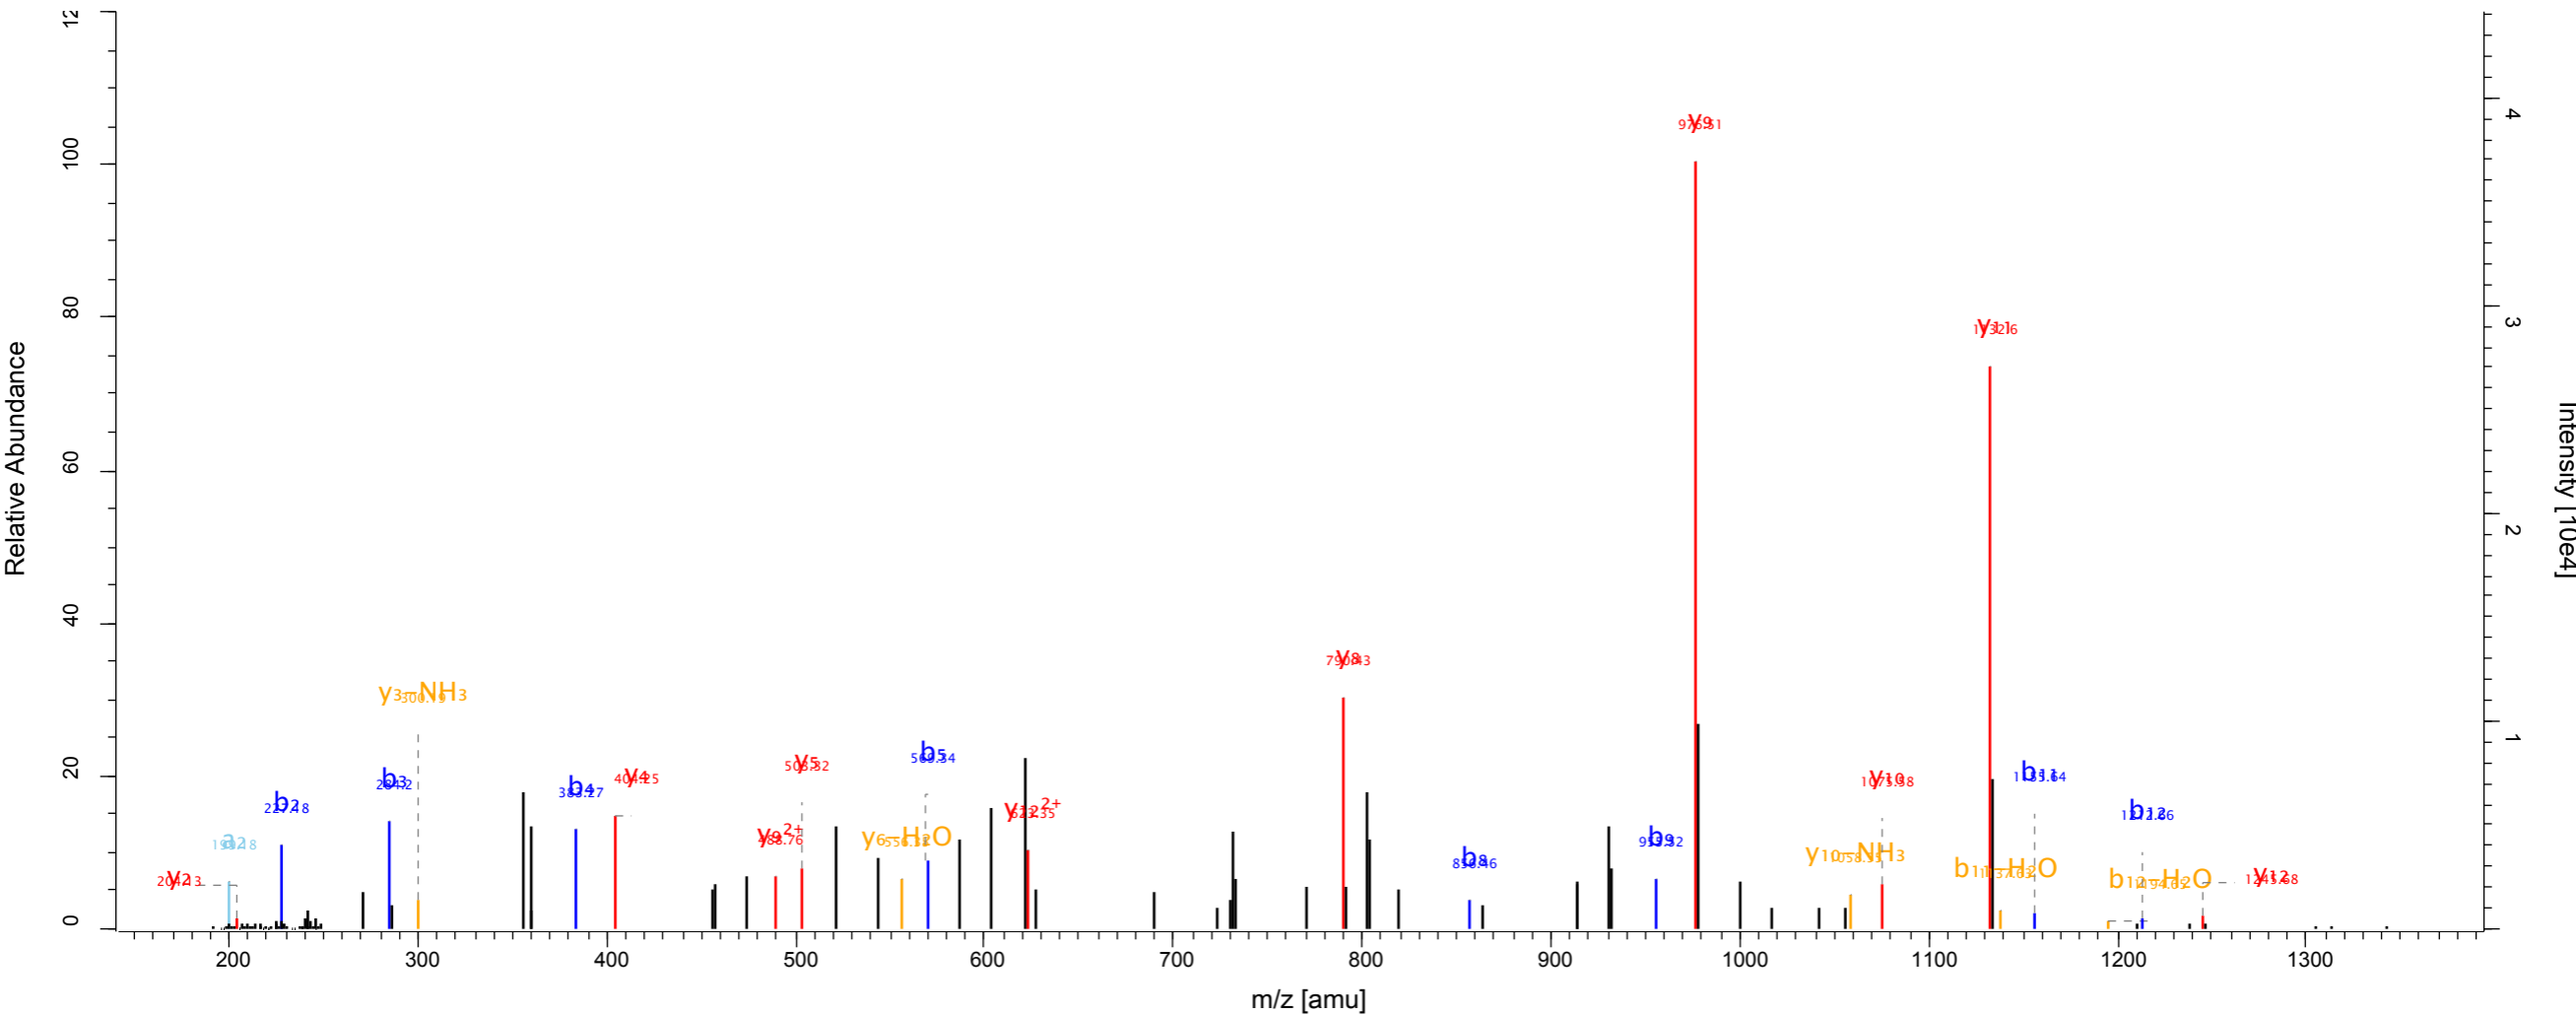

Scan number 9281 Raw file SKaraca\_LMB\_H1\_Reverse\_041011\_1\_rep1  
 Method ITMS; CID Pepti... 230.38

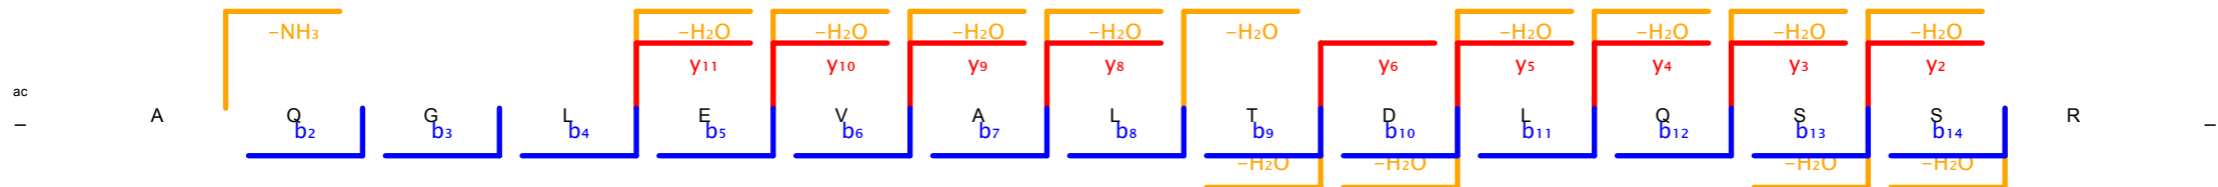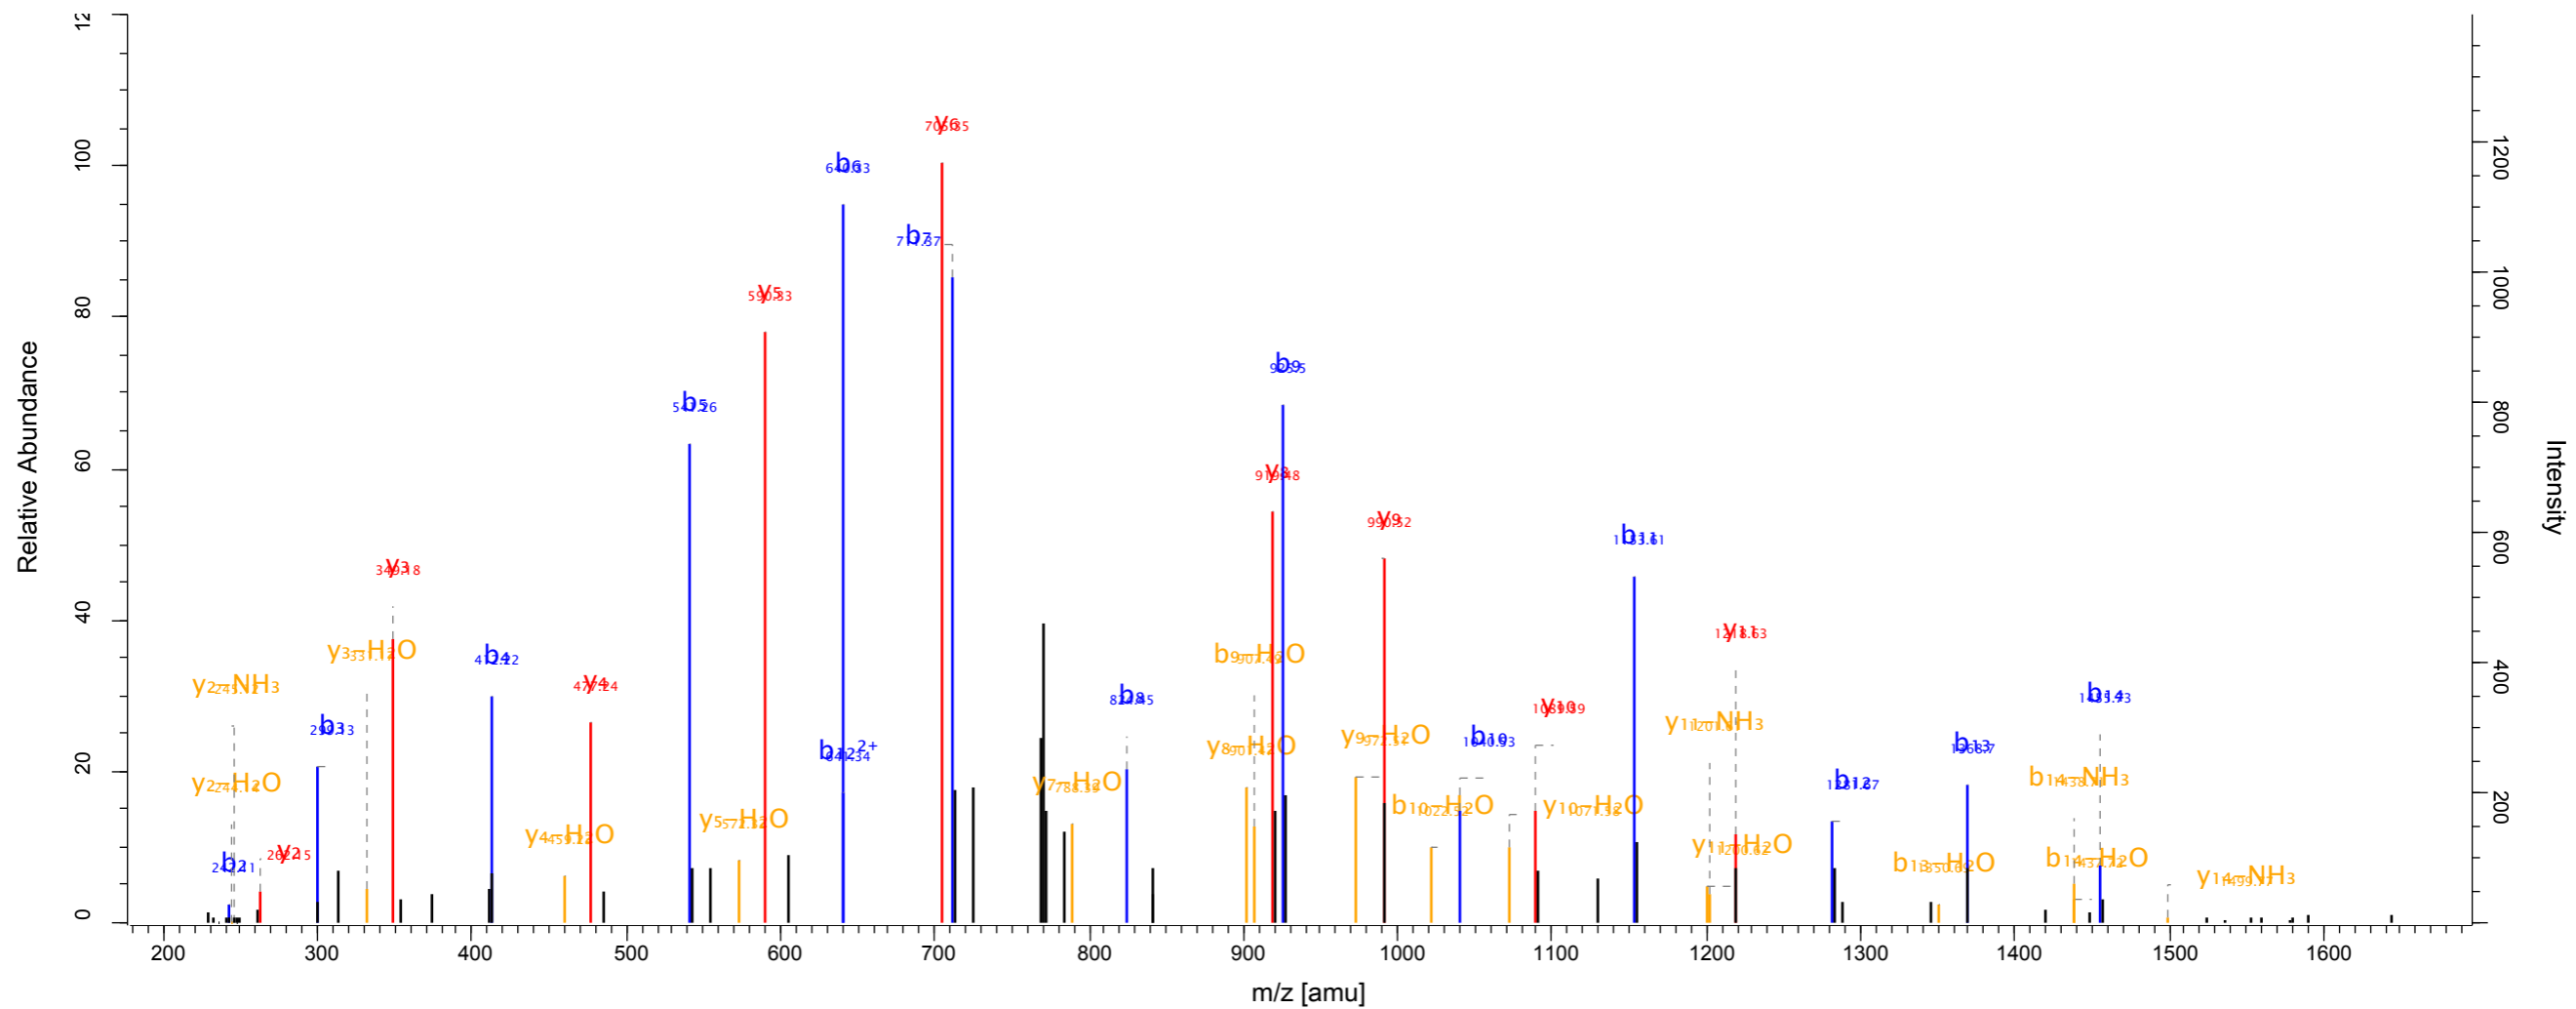



Scan number 4944 Raw file SKaraca\_LMB\_H1\_Reverse\_041011\_1\_rep2  
 Method ITMS; CID Pepti... 131.69

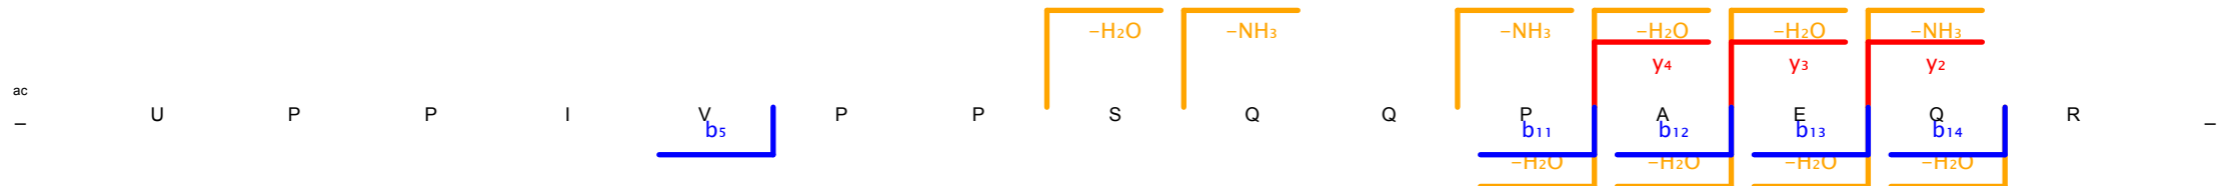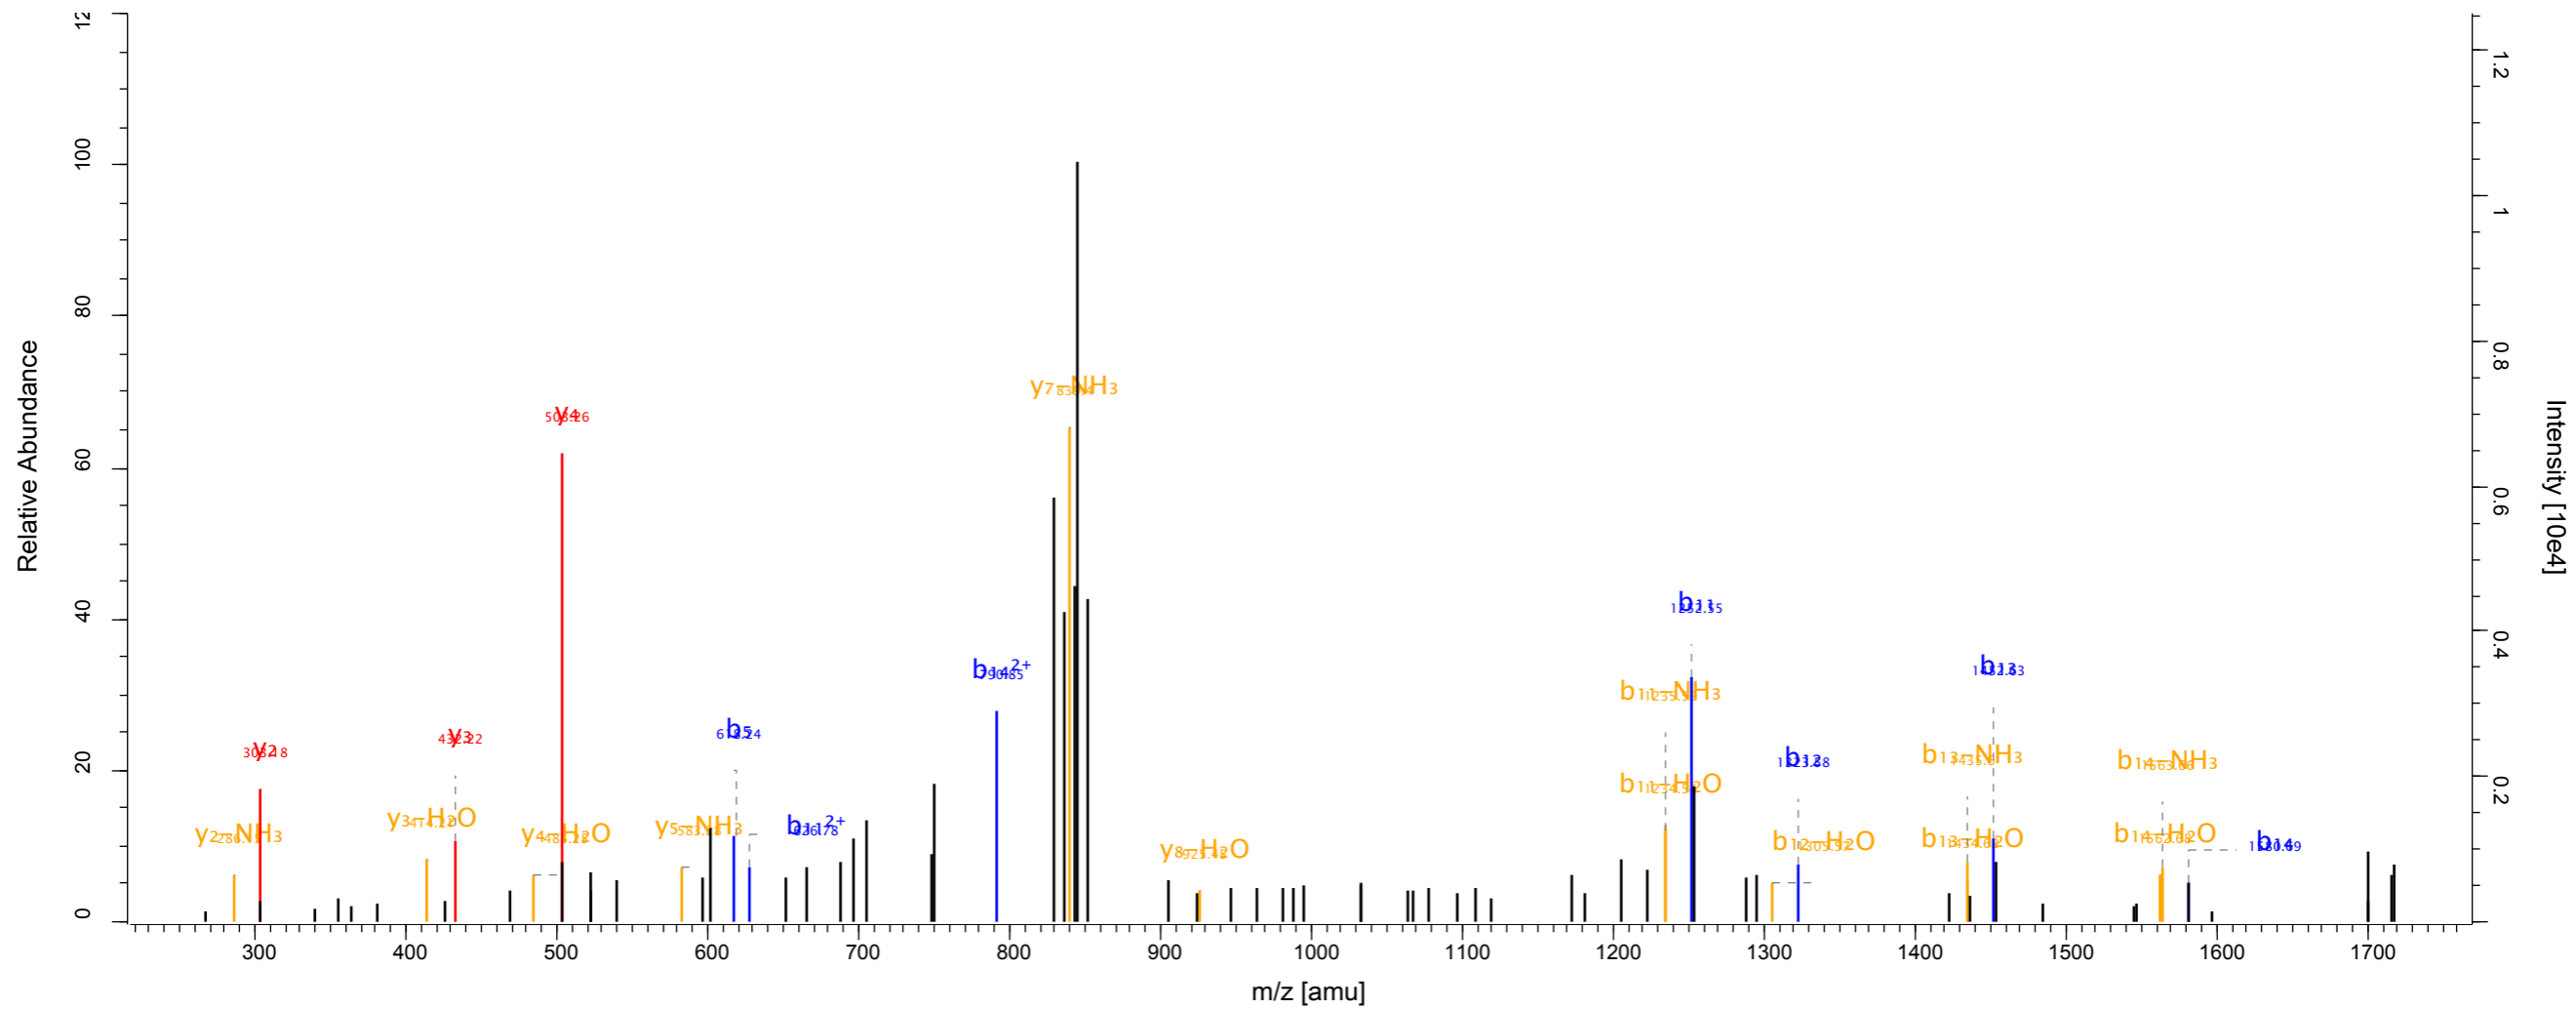

Scan number 5970 Raw file SKaraca\_LMB\_H1\_Reverse\_041011\_1\_rep2  
 Method ITMS; CID Pepti... 131.17

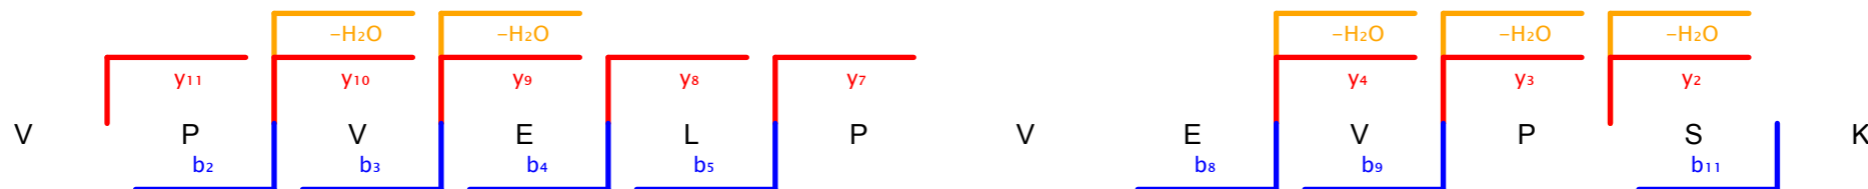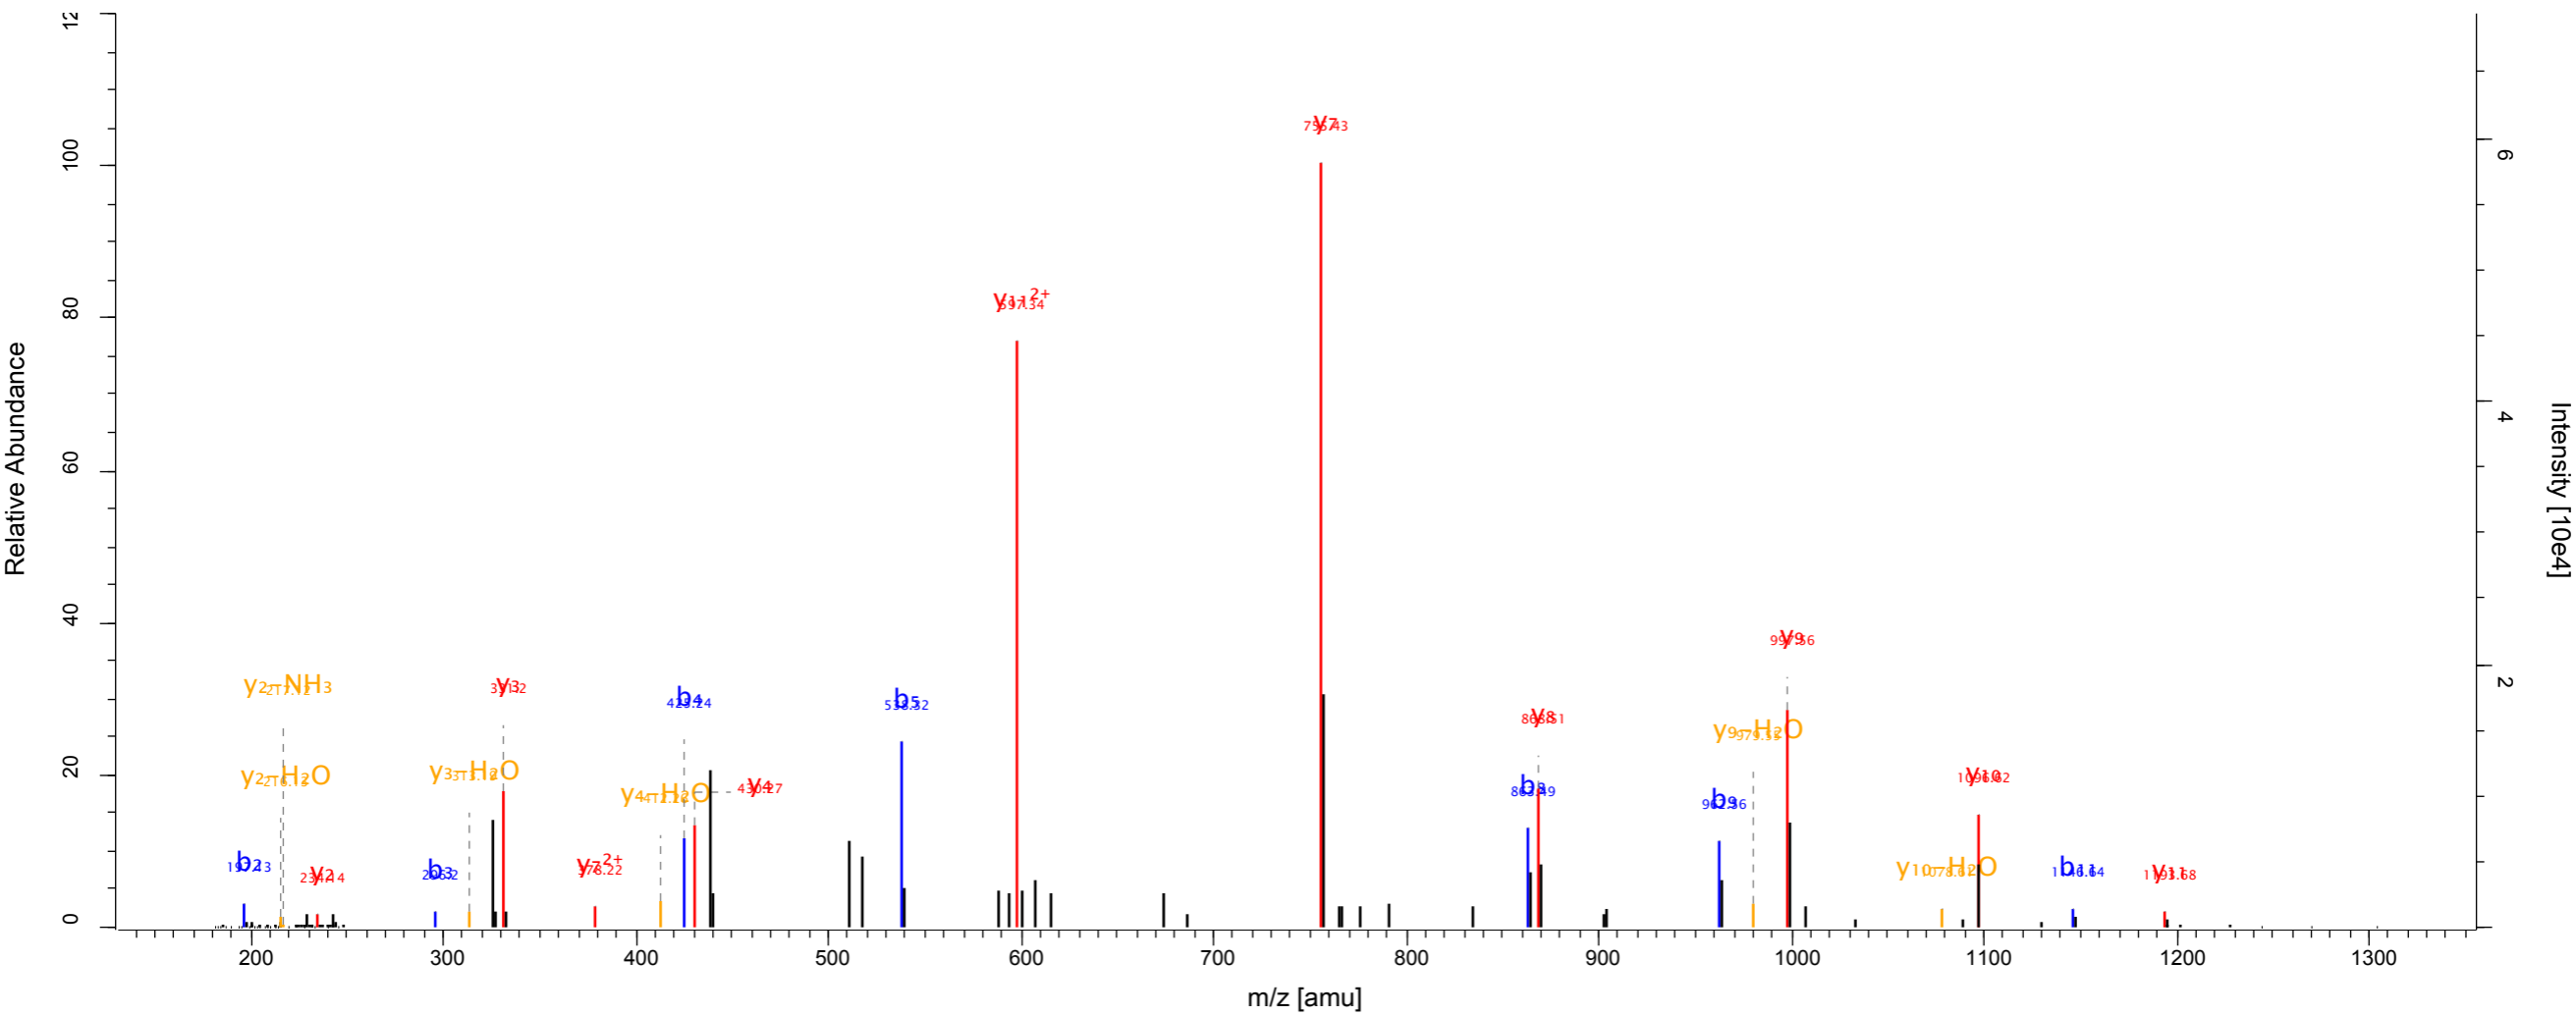



Scan number 8458 Raw file SKaraca\_LMB\_H1\_Reverse\_041011\_1\_rep2  
 Method ITMS; CID Pepti... 145.46

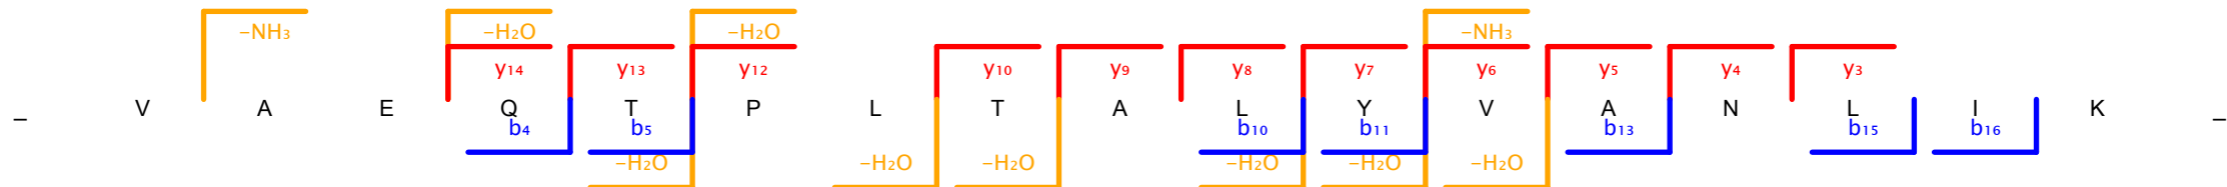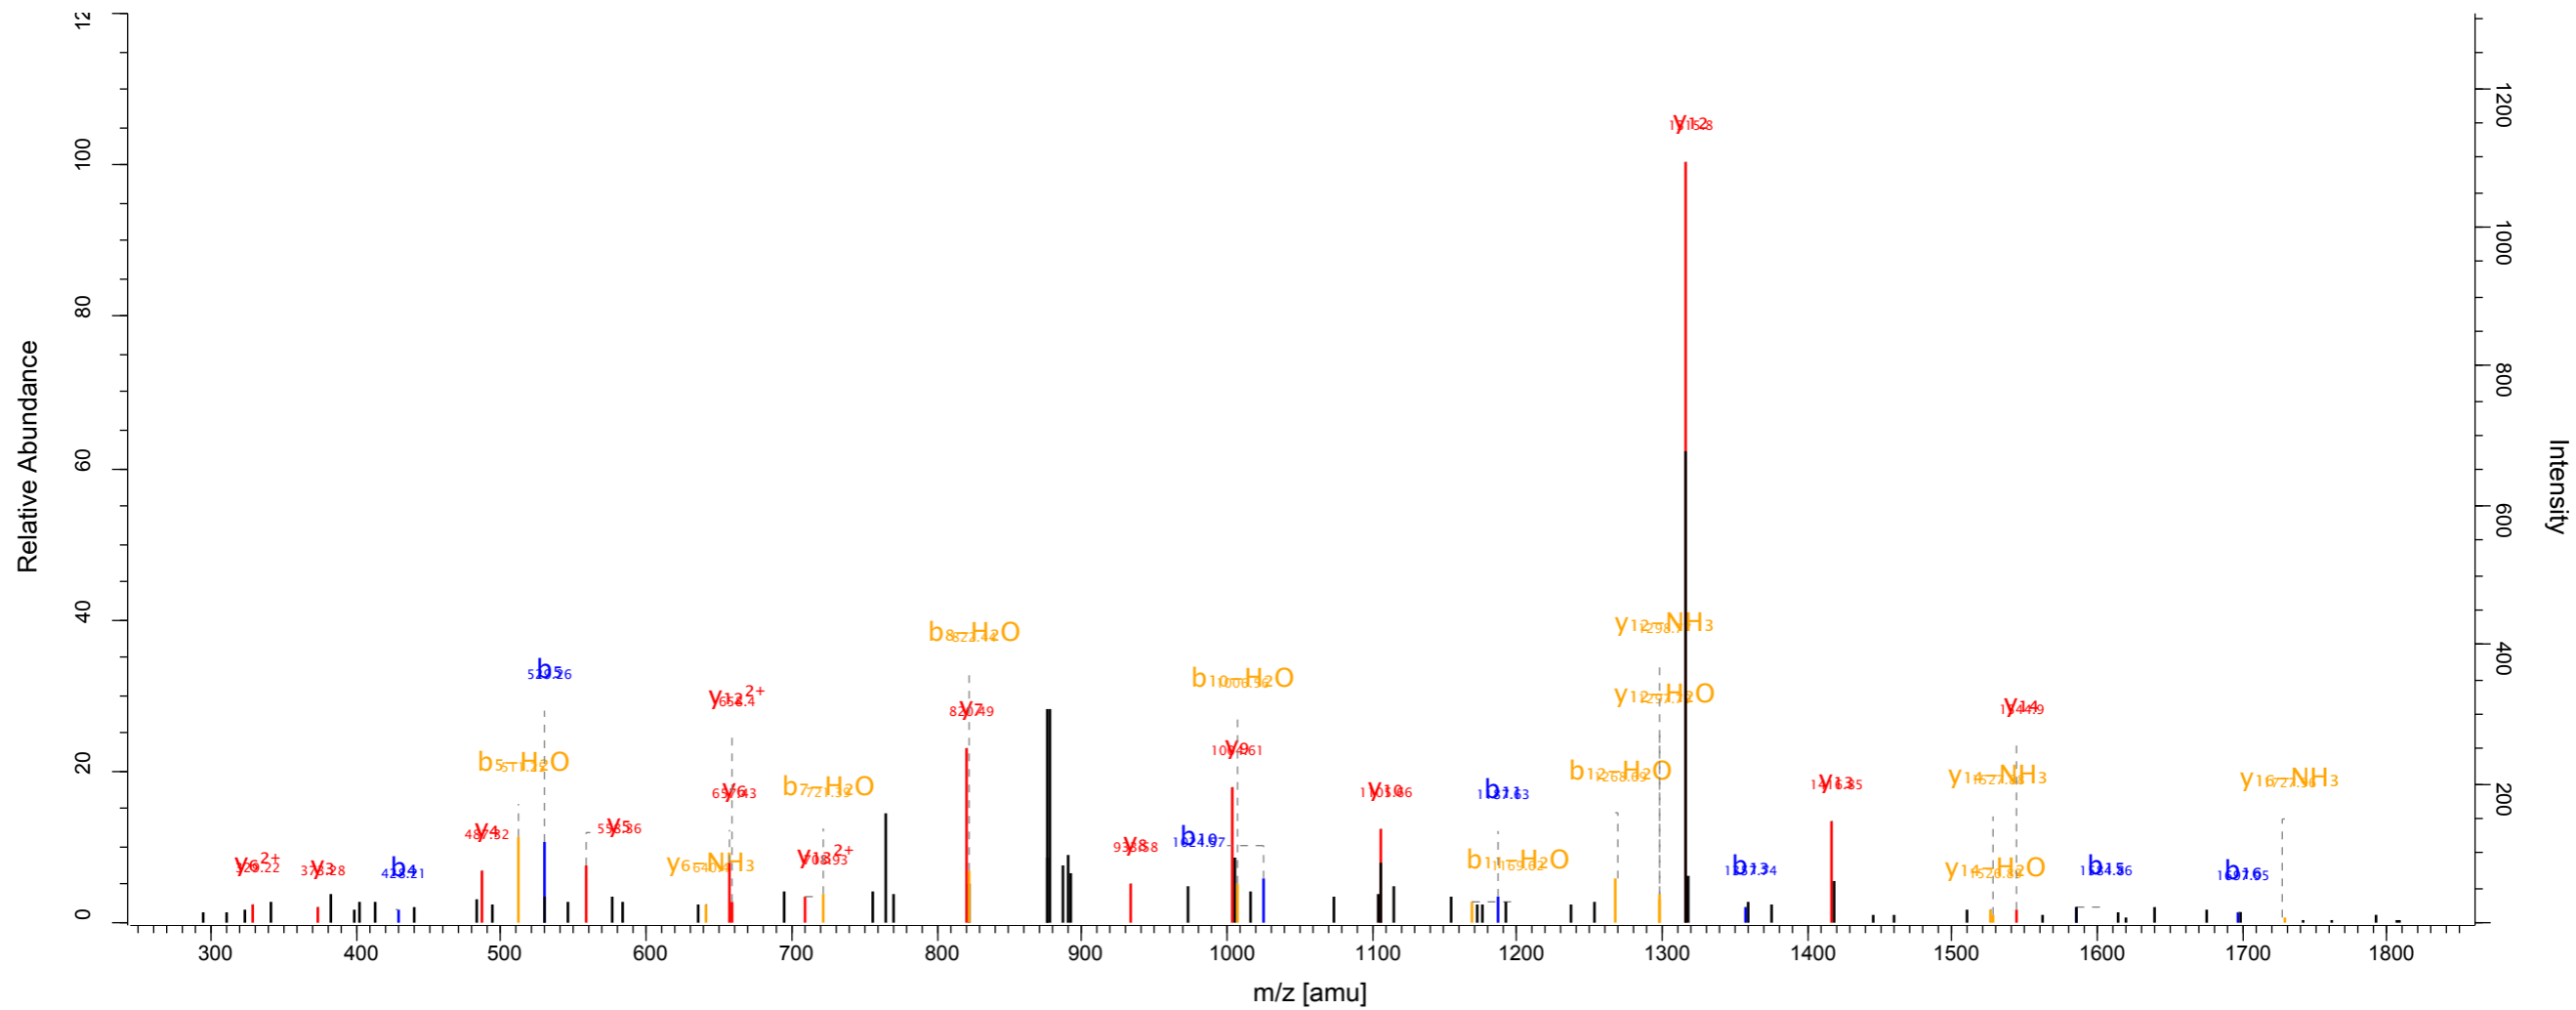

Scan number 8366 Raw file SKaraca\_LMB\_H1\_Reverse\_041011\_10\_rep1  
 Method ITMS; CID Pepti... 154.36

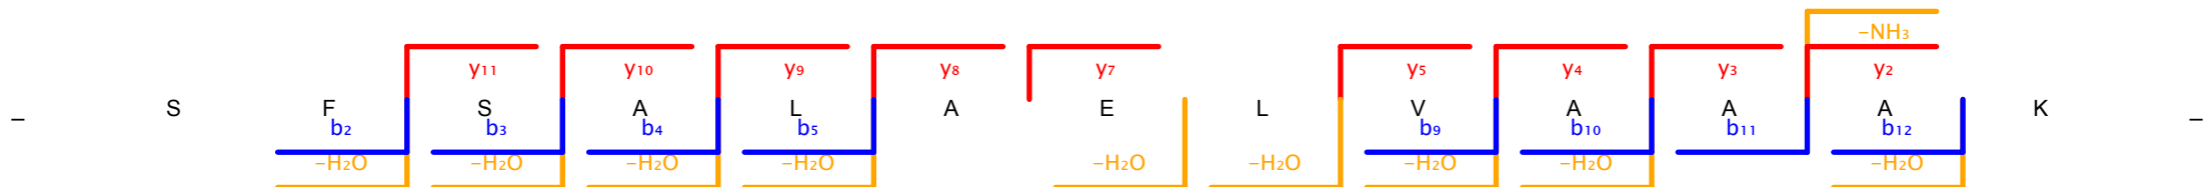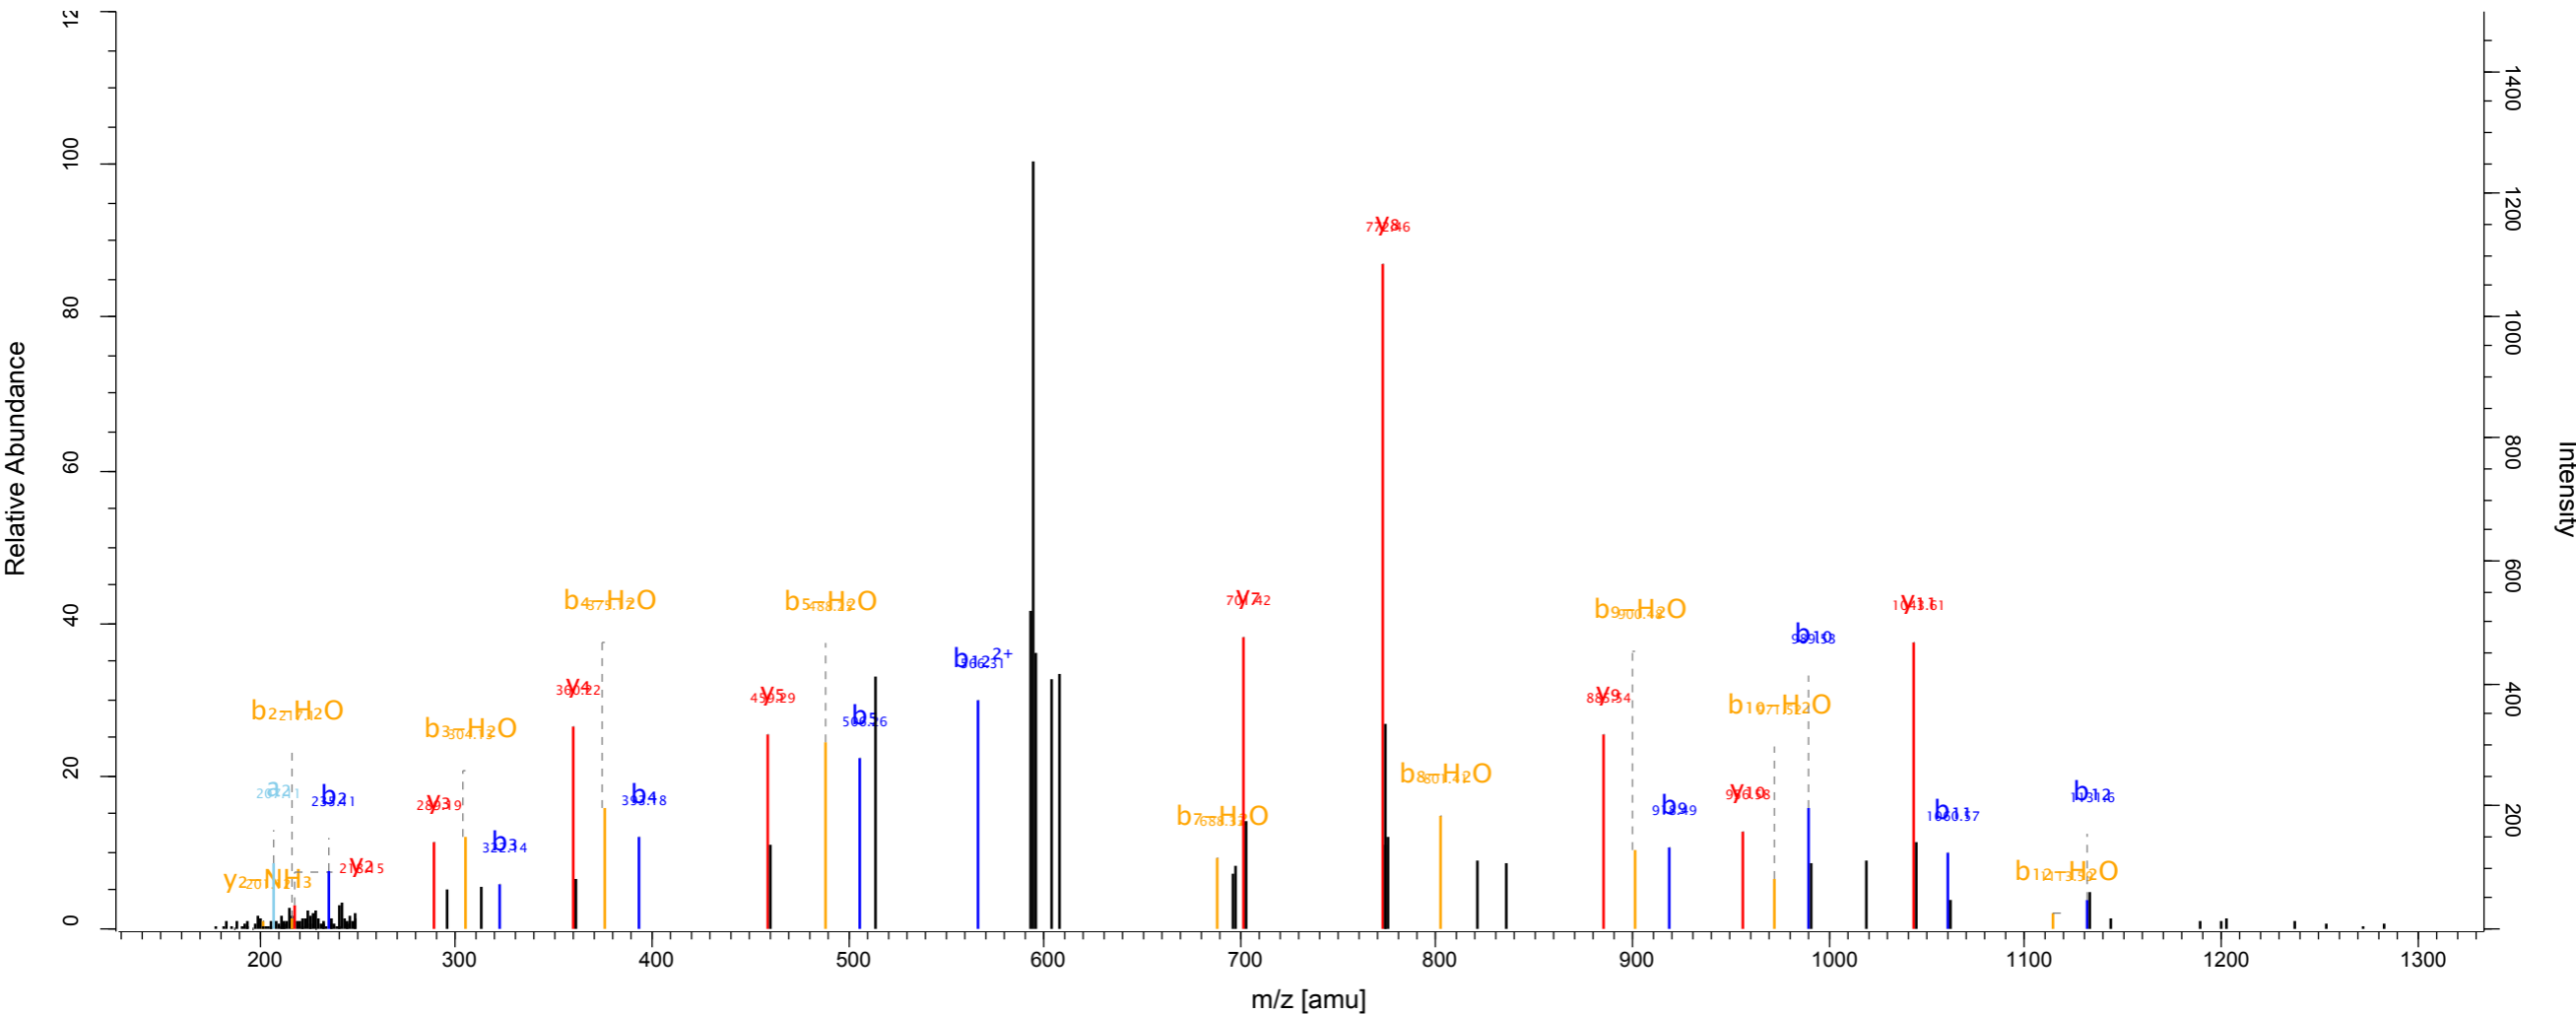

Scan number 9219 Raw file SKaraca\_LMB\_H1\_Reverse\_041011\_10\_rep1  
 Method ITMS; CID Pepti... 172.13

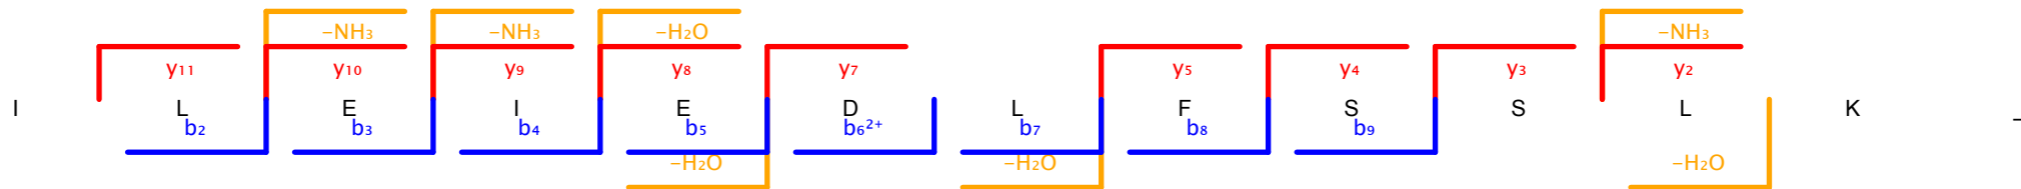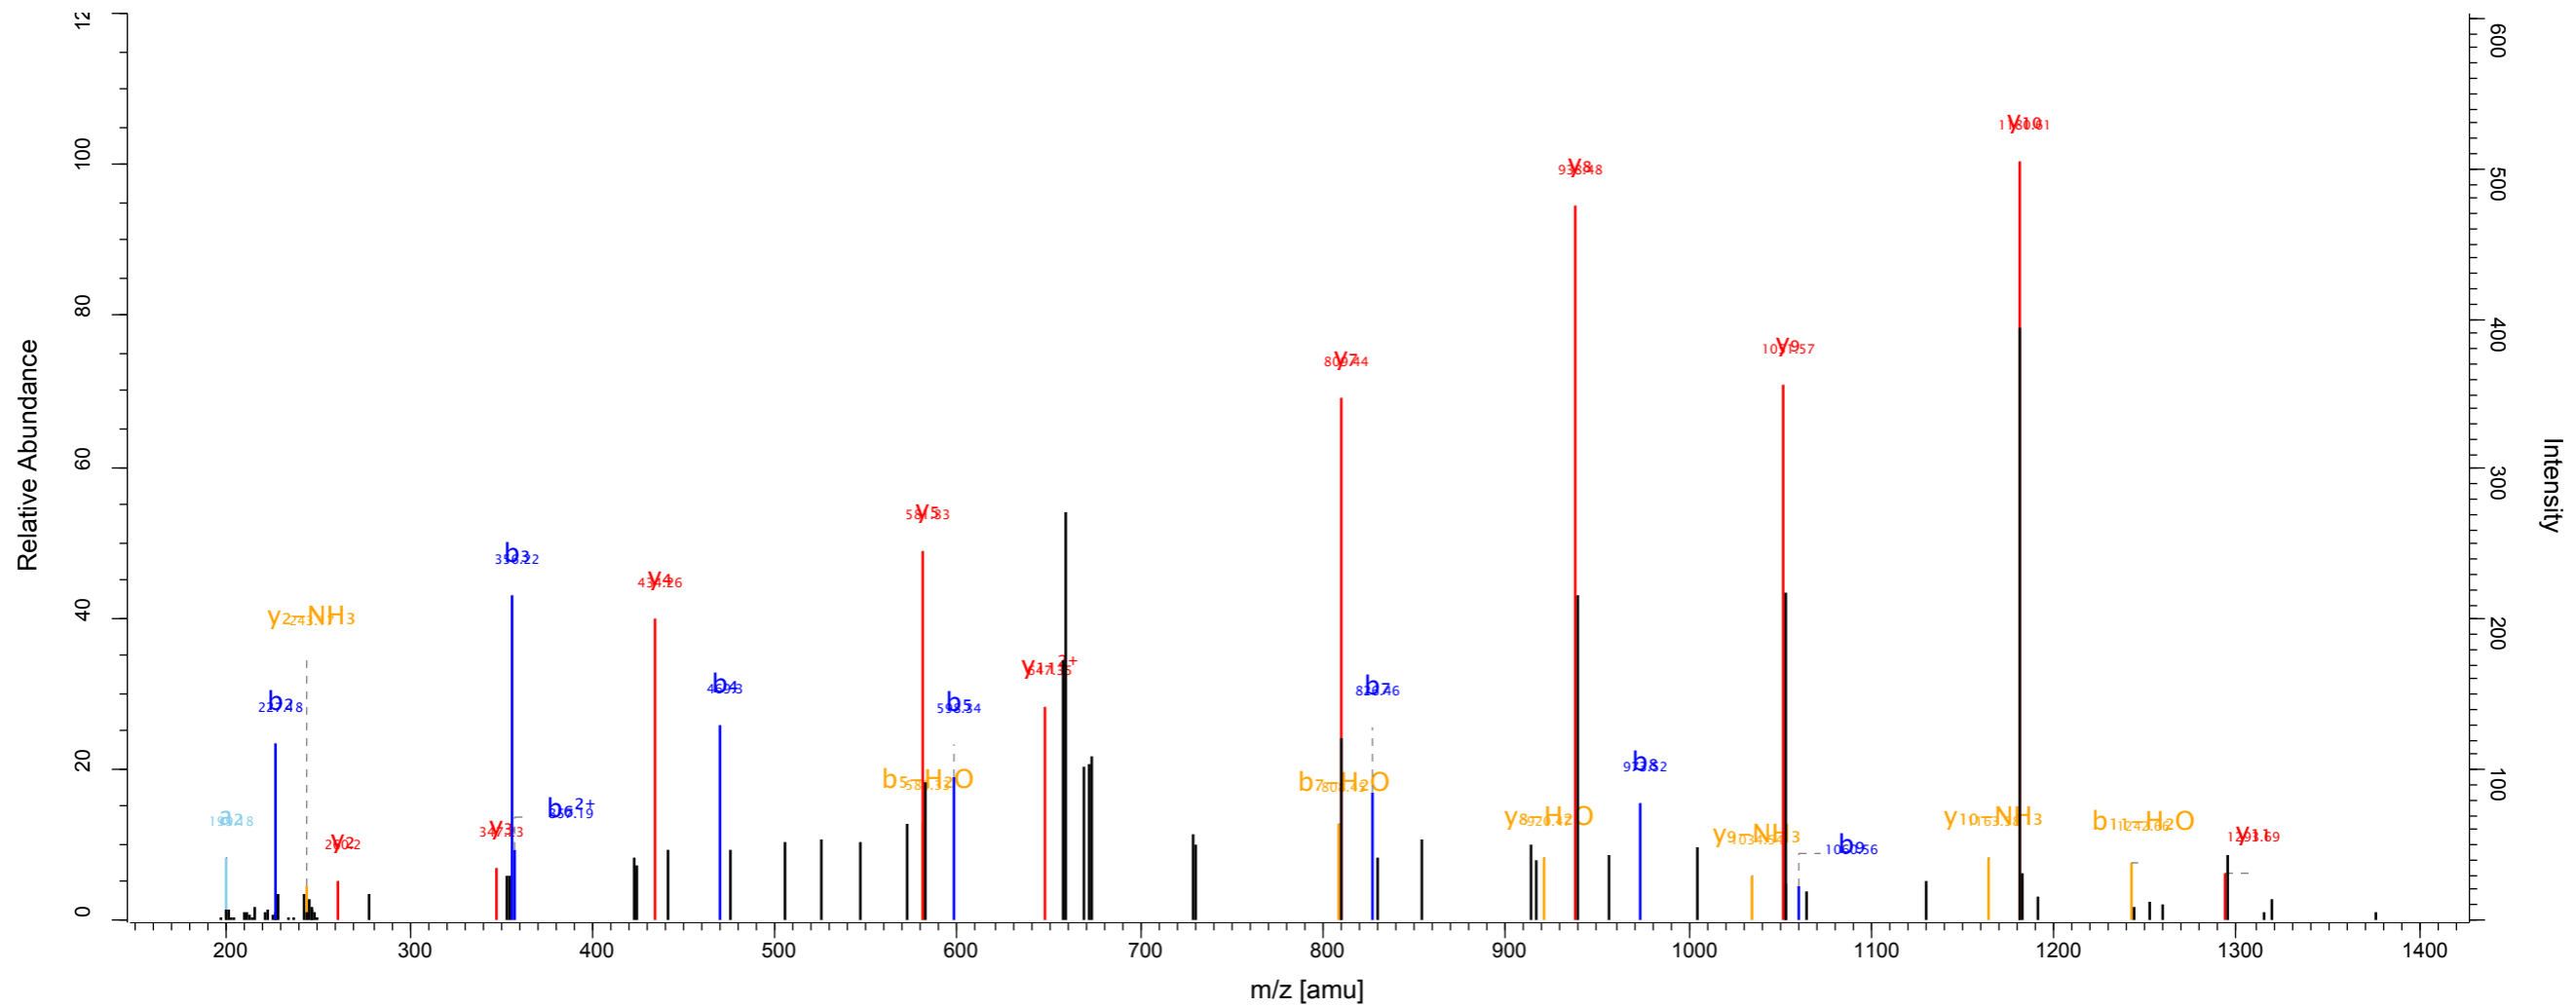

|             |           |          |                                       |
|-------------|-----------|----------|---------------------------------------|
| Scan number | 8296      | Raw file | SKaraca_LMB_H1_Reverse_041011_11_rep1 |
| Method      | ITMS; CID | Pepti... | 106.36                                |

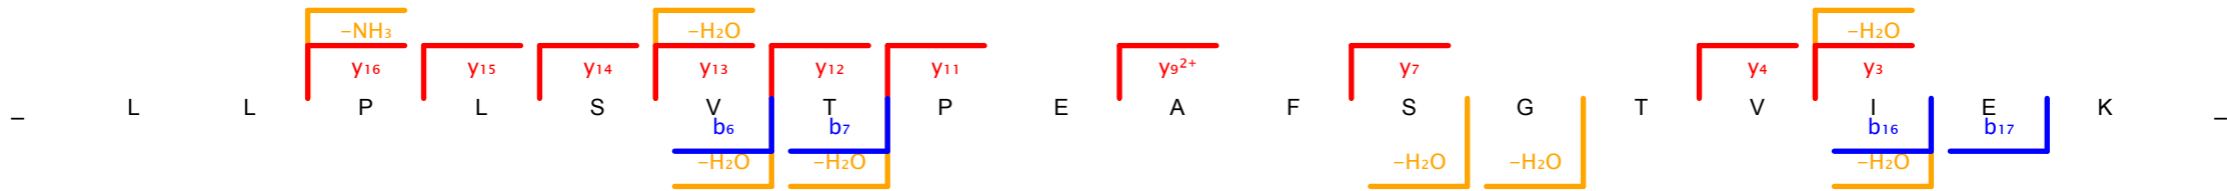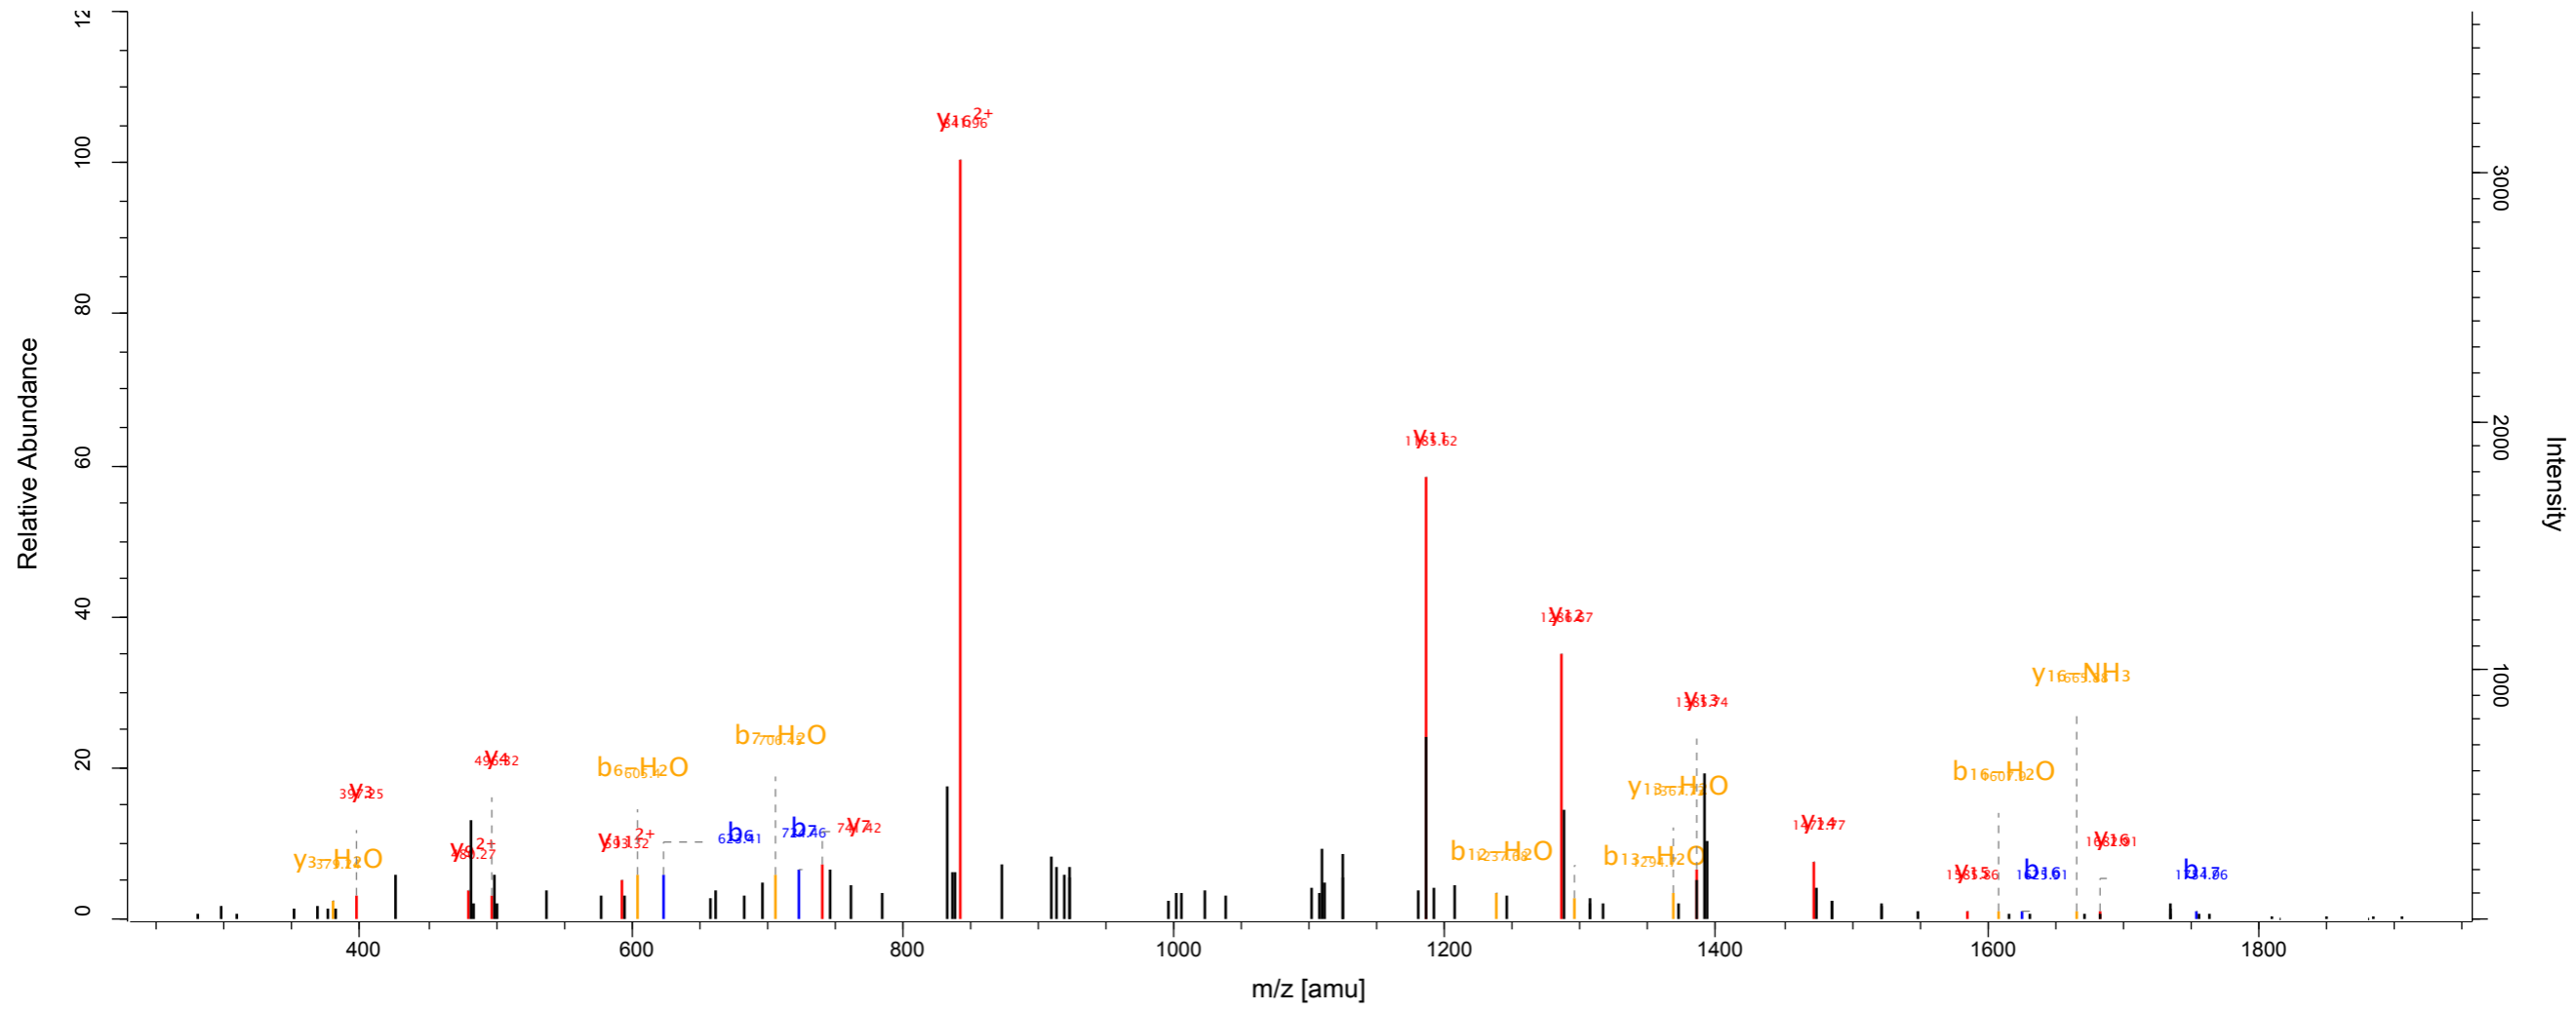

Scan number 8990 Raw file SKaraca\_LMB\_H1\_Reverse\_041011\_12\_rep1  
 Method ITMS; CID Pepti... 143.94

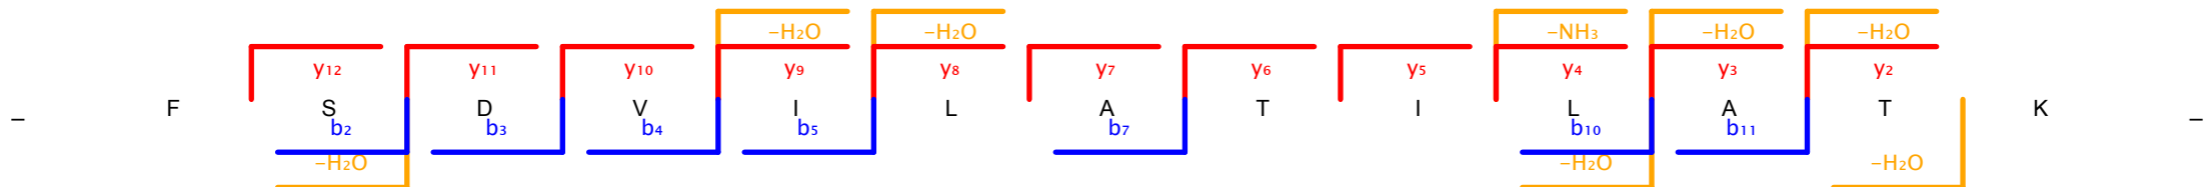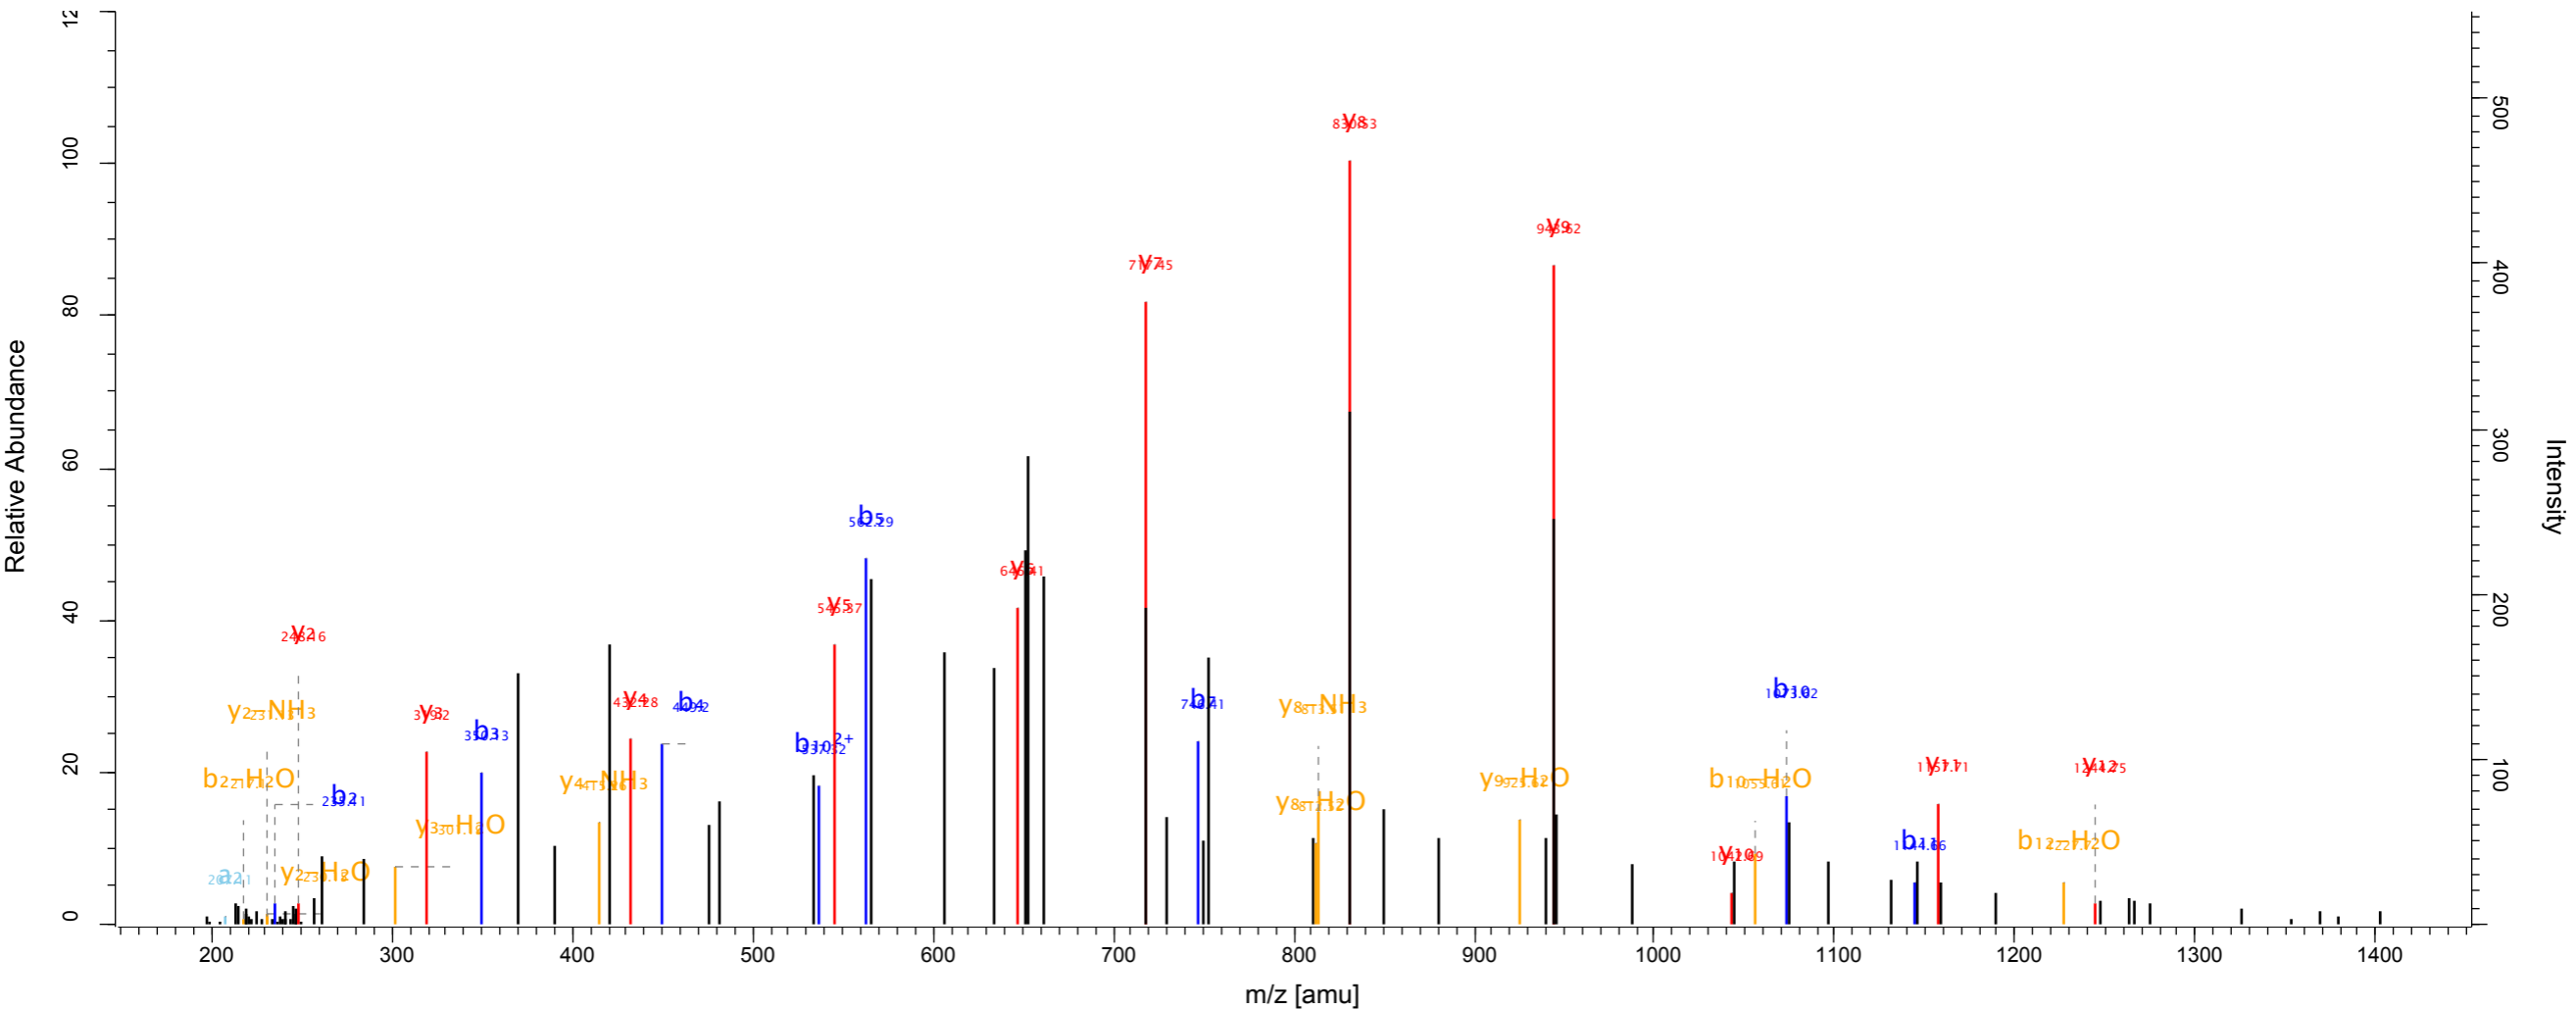



Scan number 3437 Raw file SKaraca\_LMB\_H1\_Reverse\_041011\_14\_rep2  
 Method ITMS; CID Pepti... 123.51

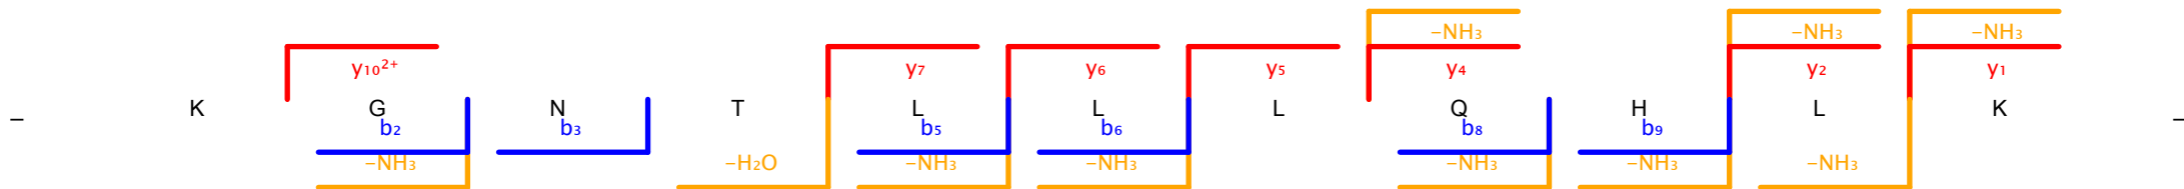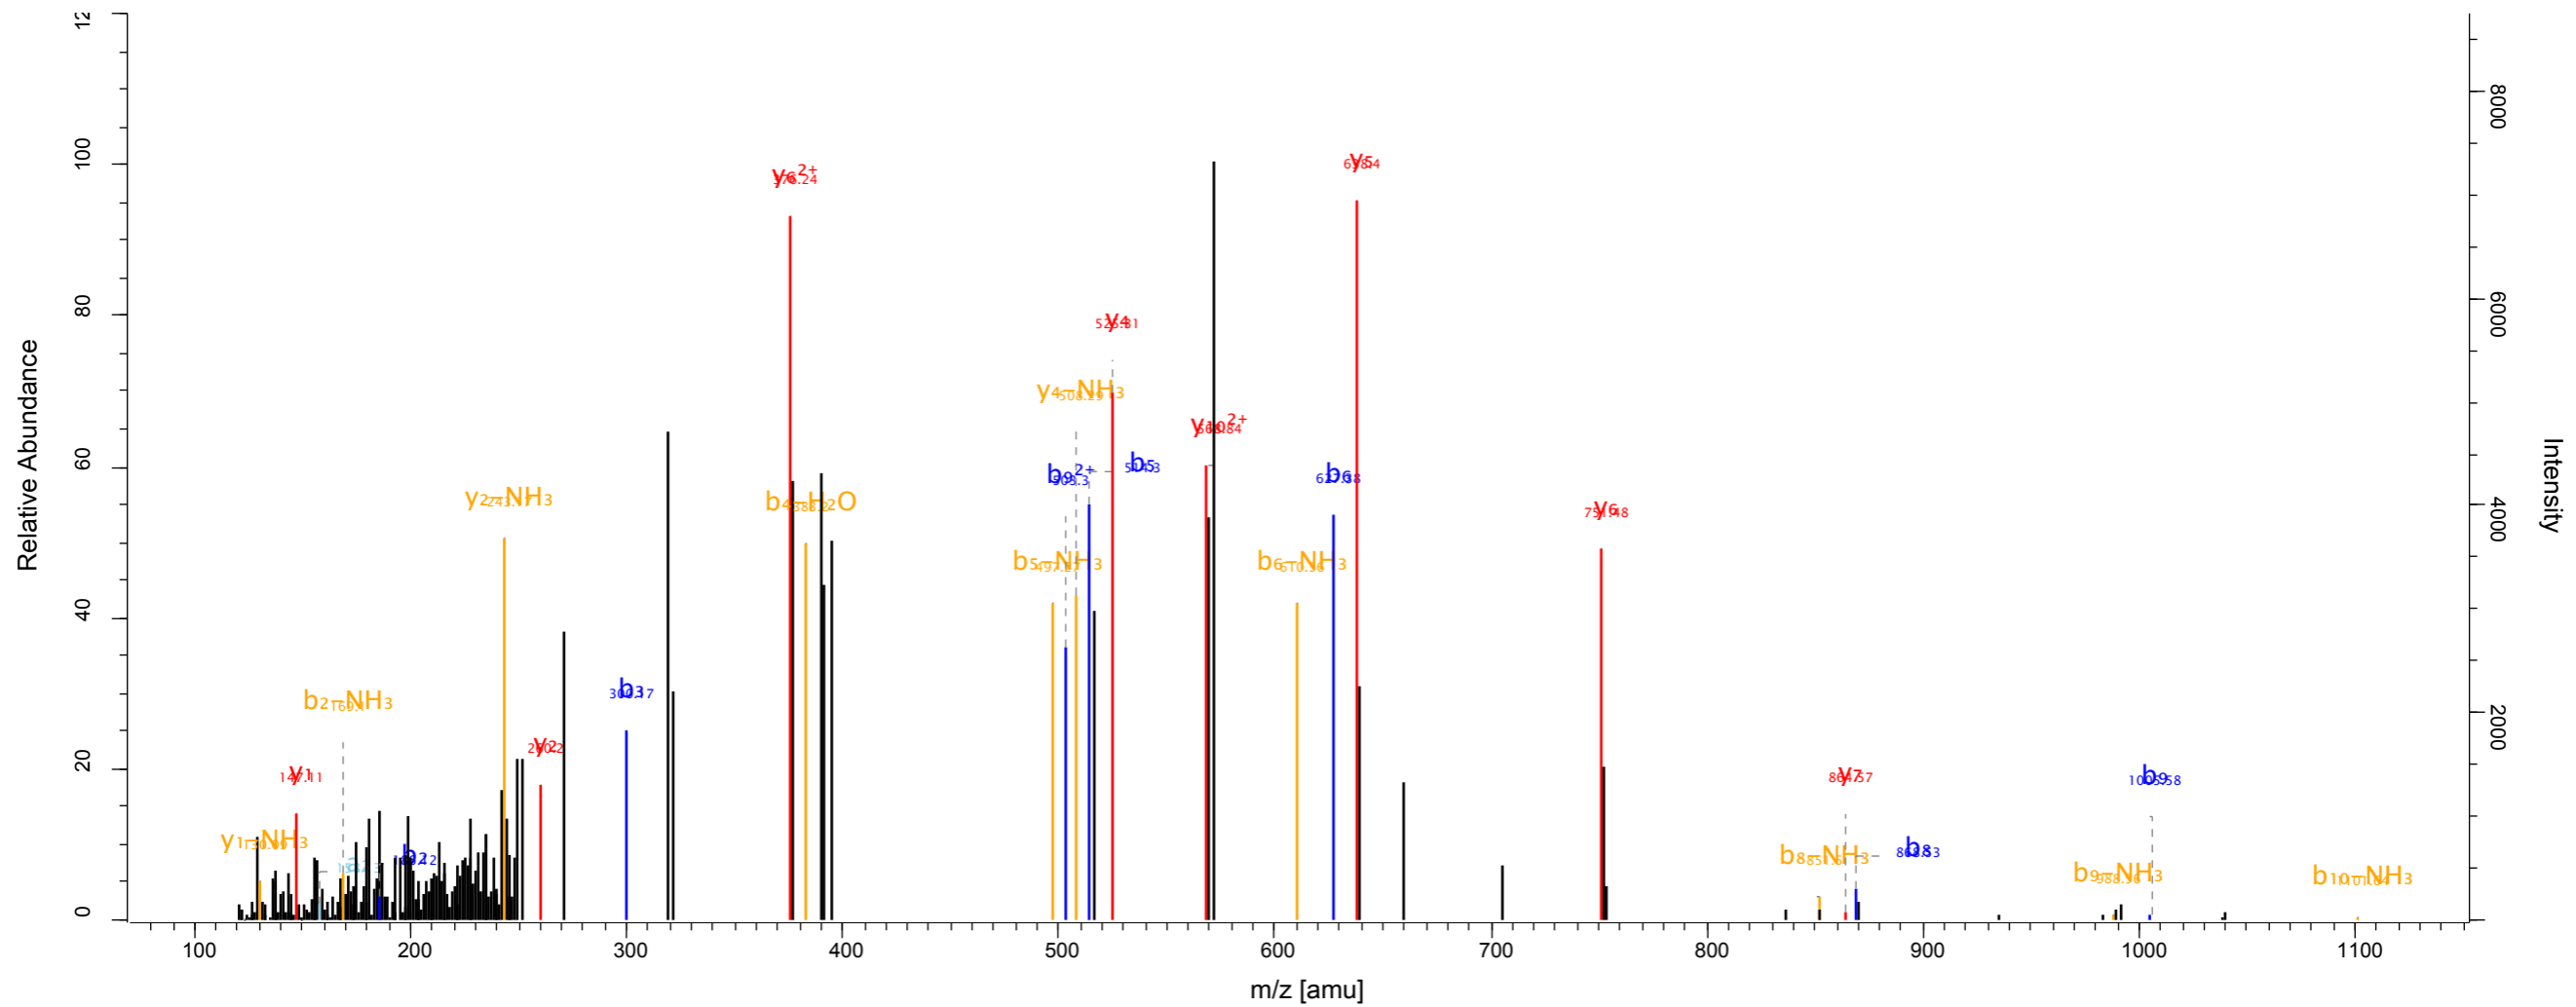

|             |           |          |                                       |
|-------------|-----------|----------|---------------------------------------|
| Scan number | 1440      | Raw file | SKaraca_LMB_H1_Reverse_041011_15_rep2 |
| Method      | ITMS; CID | Pepti... | 140.49                                |

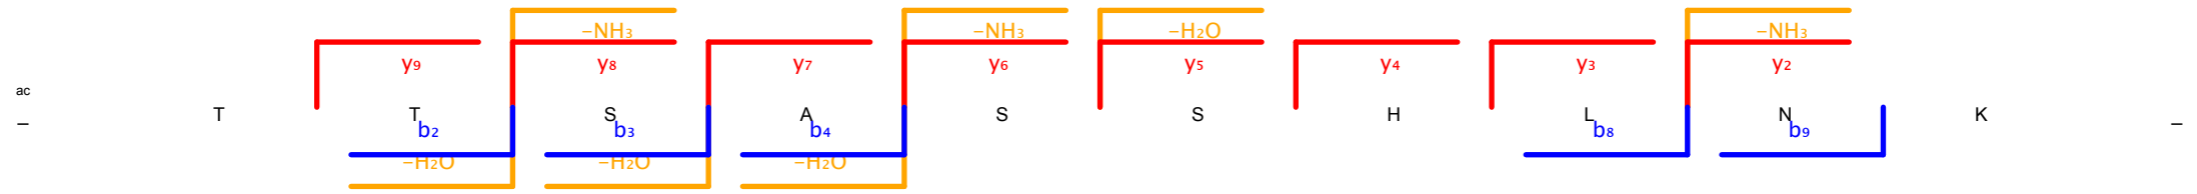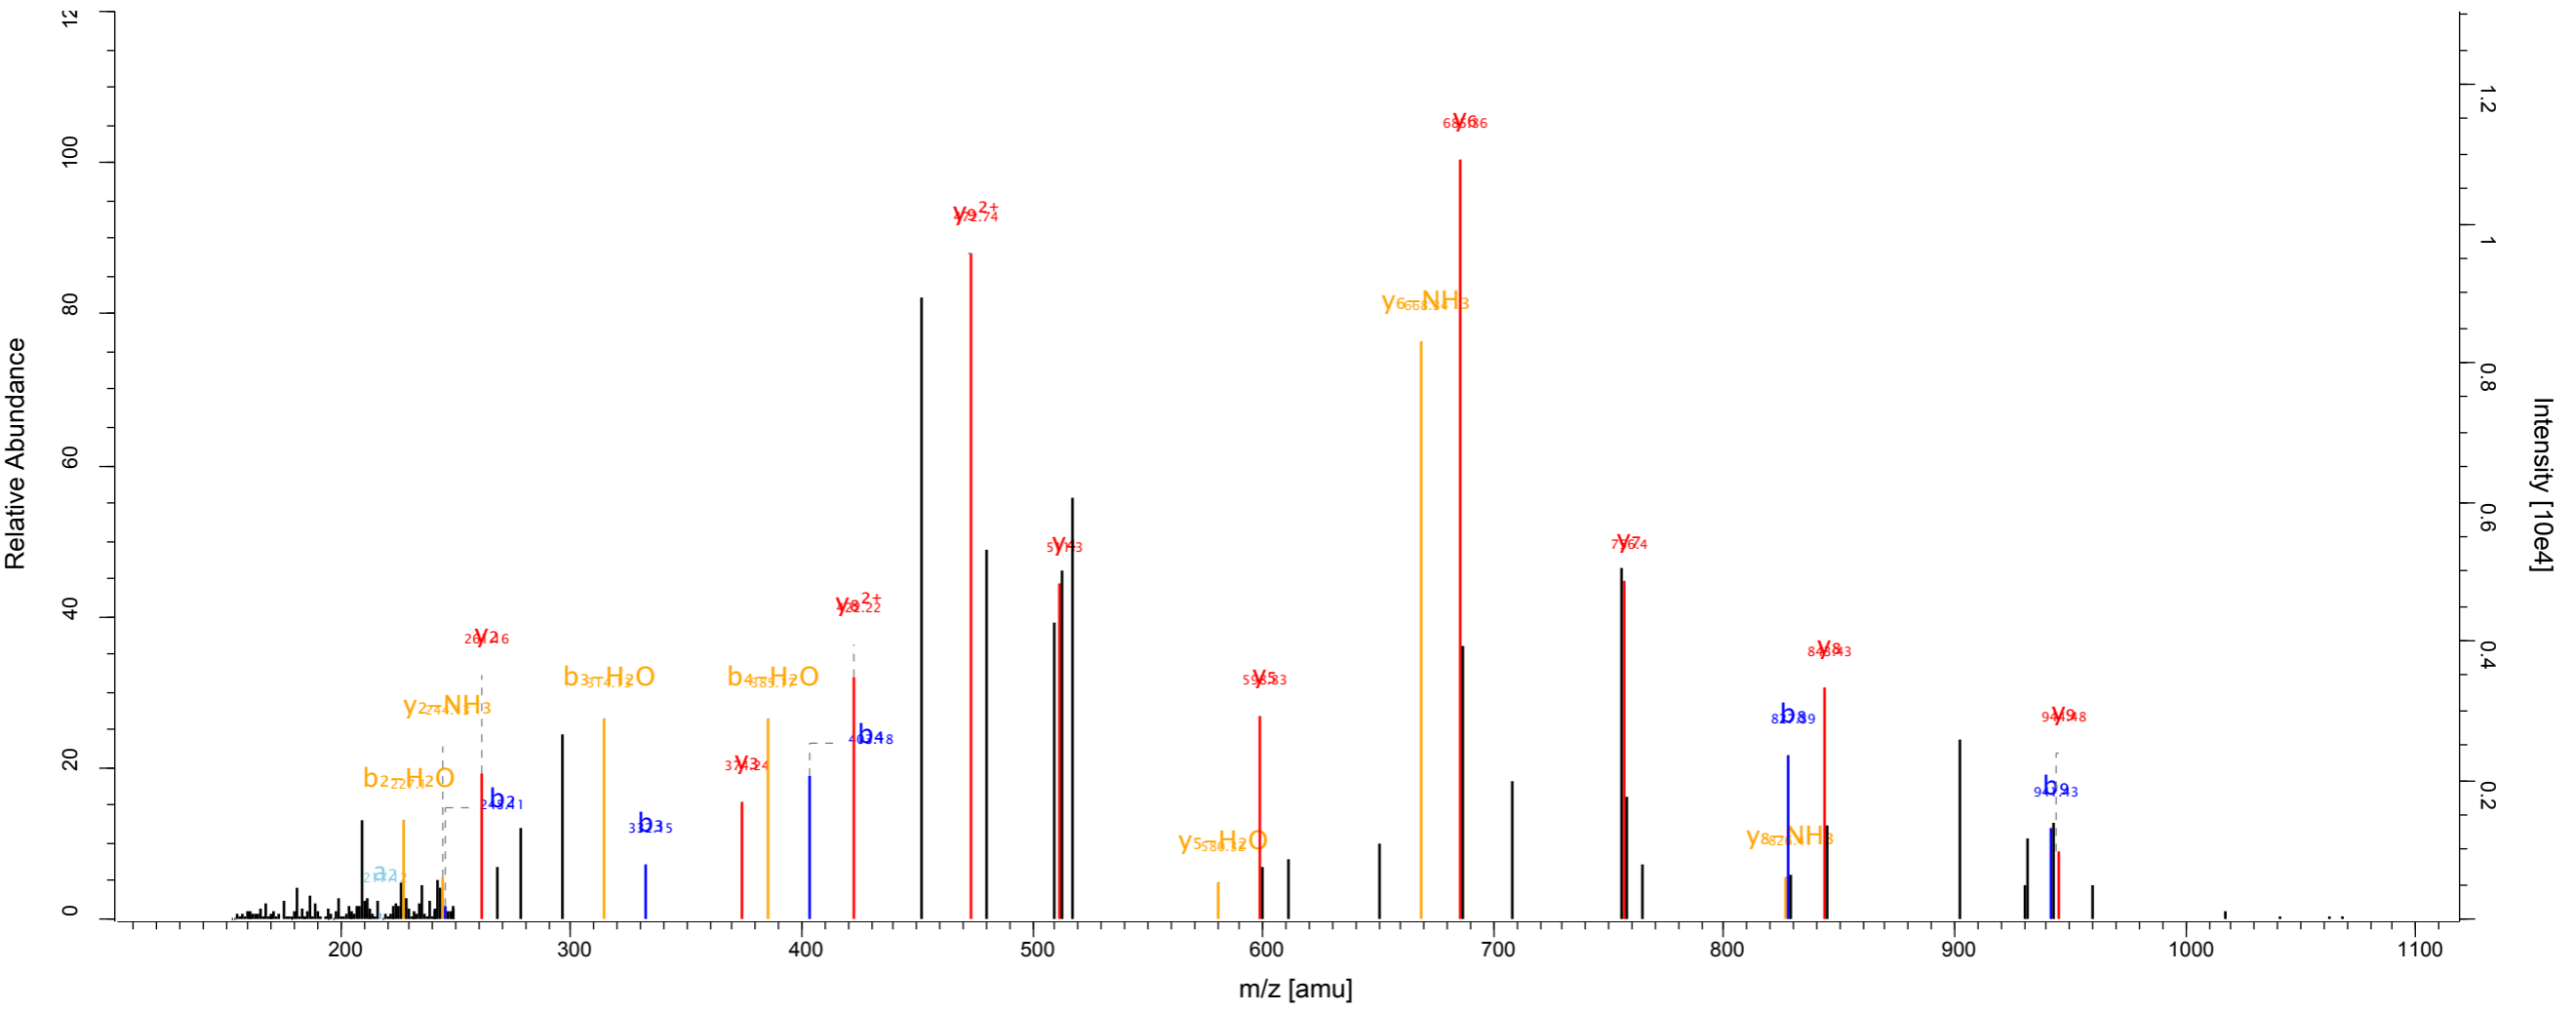

Scan number 8582 Raw file SKaraca\_LMB\_H1\_Reverse\_041011\_15\_rep2  
 Method ITMS; CID Pepti... 150.1

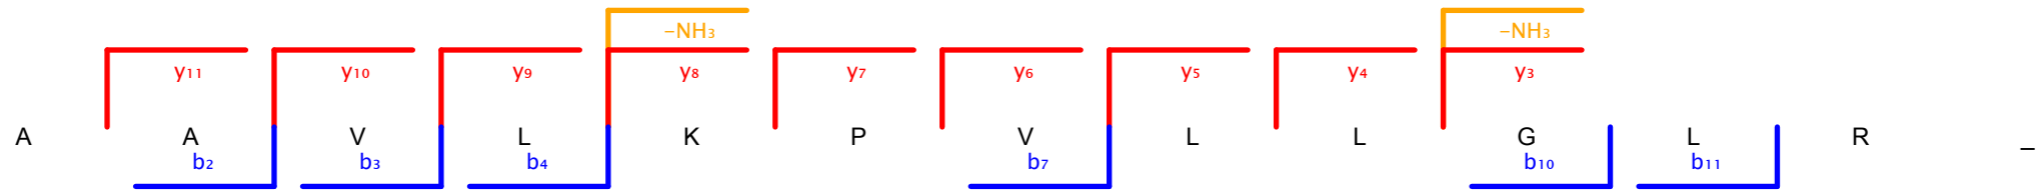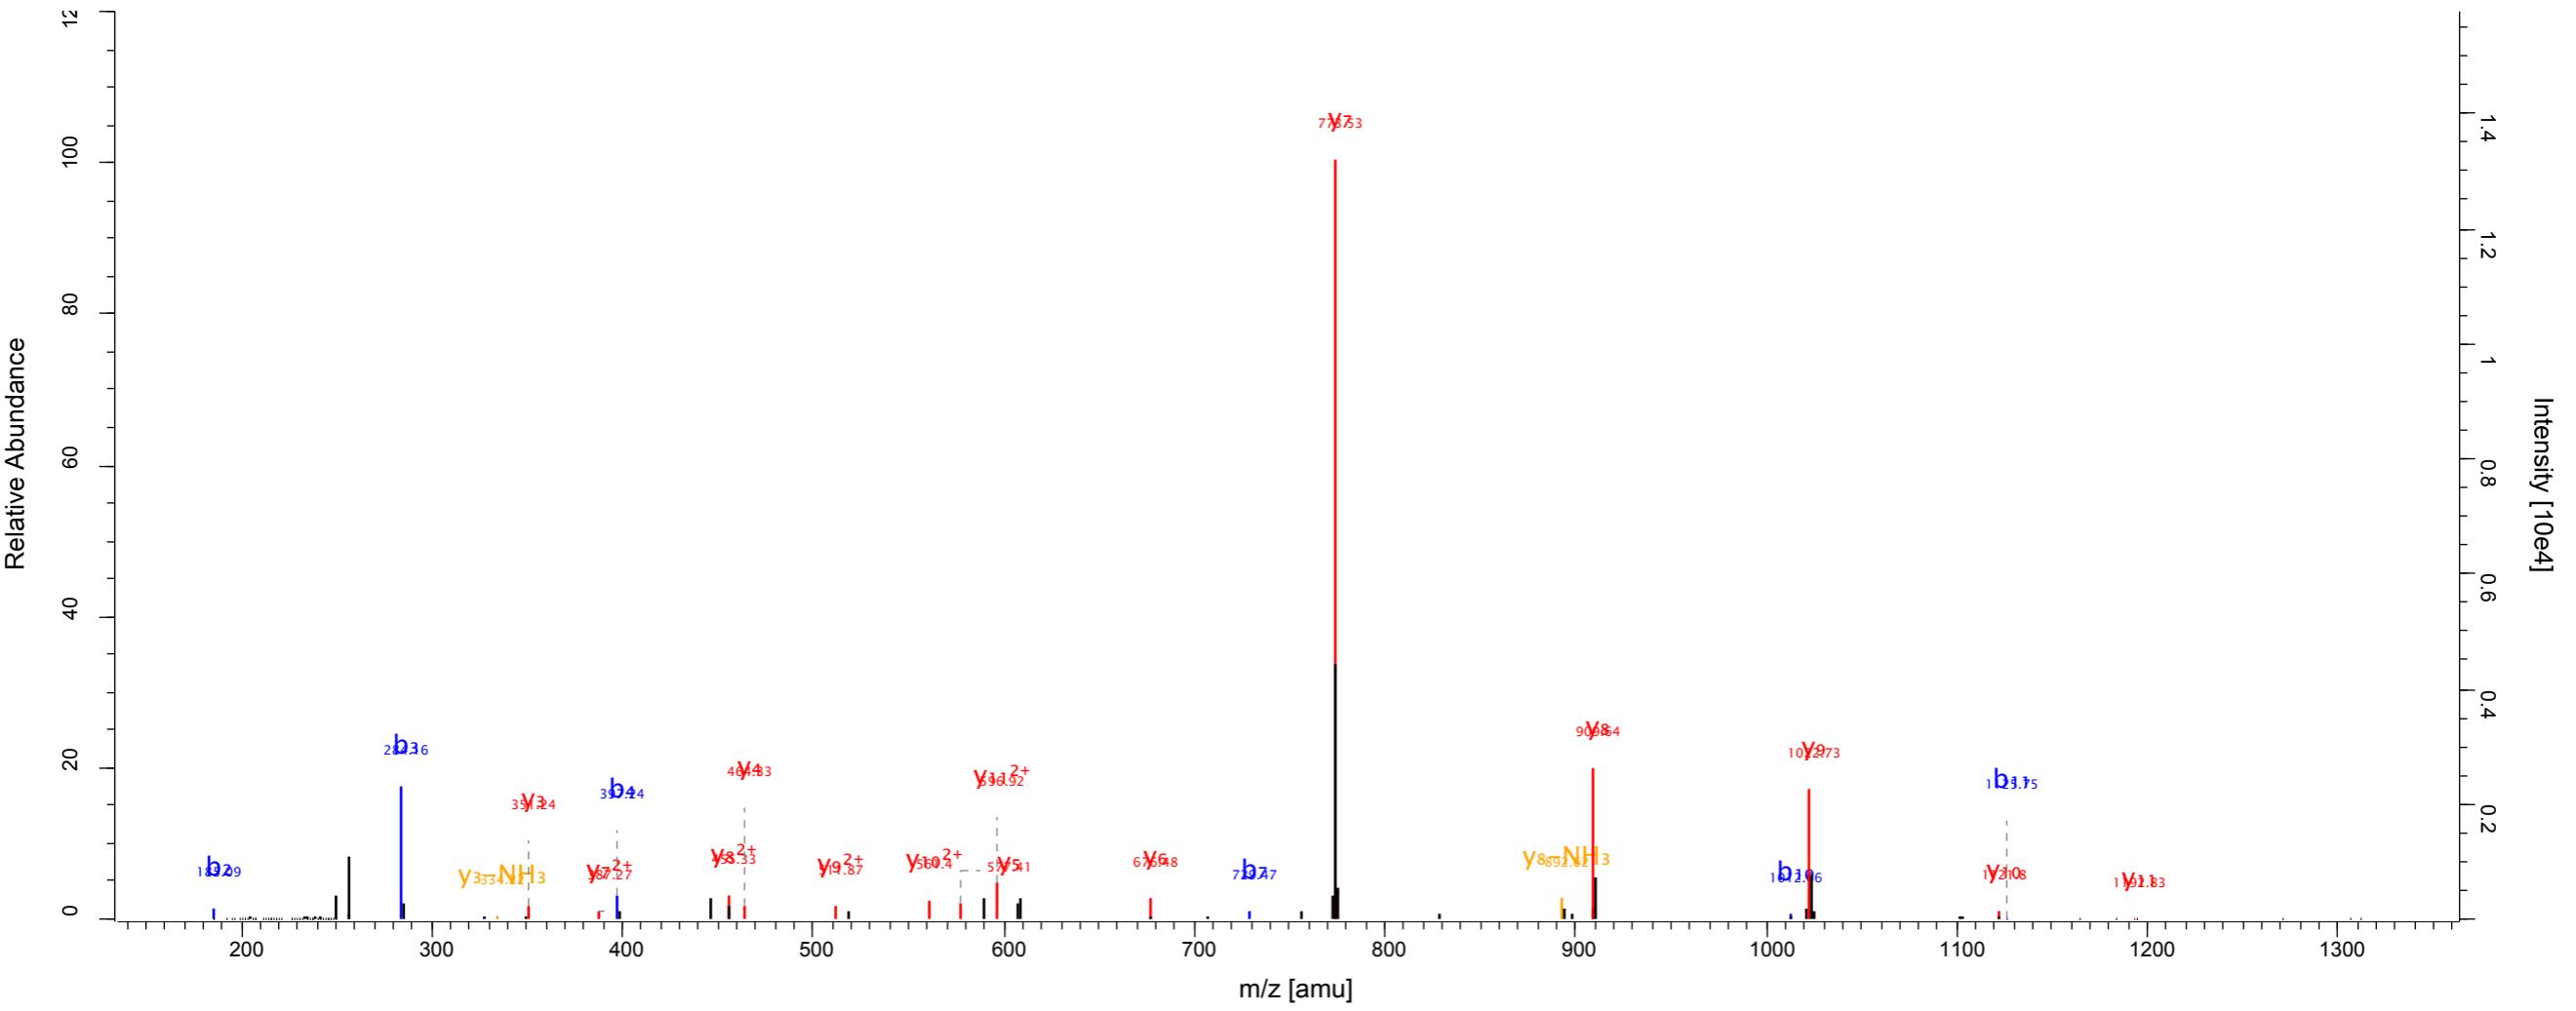

Scan number 5456 Raw file SKaraca\_LMB\_H1\_Reverse\_041011\_16\_rep1  
Method ITMS; CID Pepti... 116.63

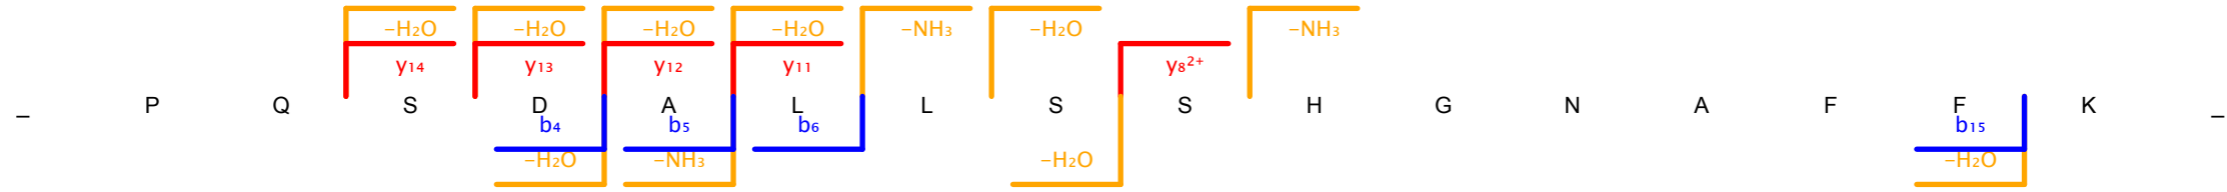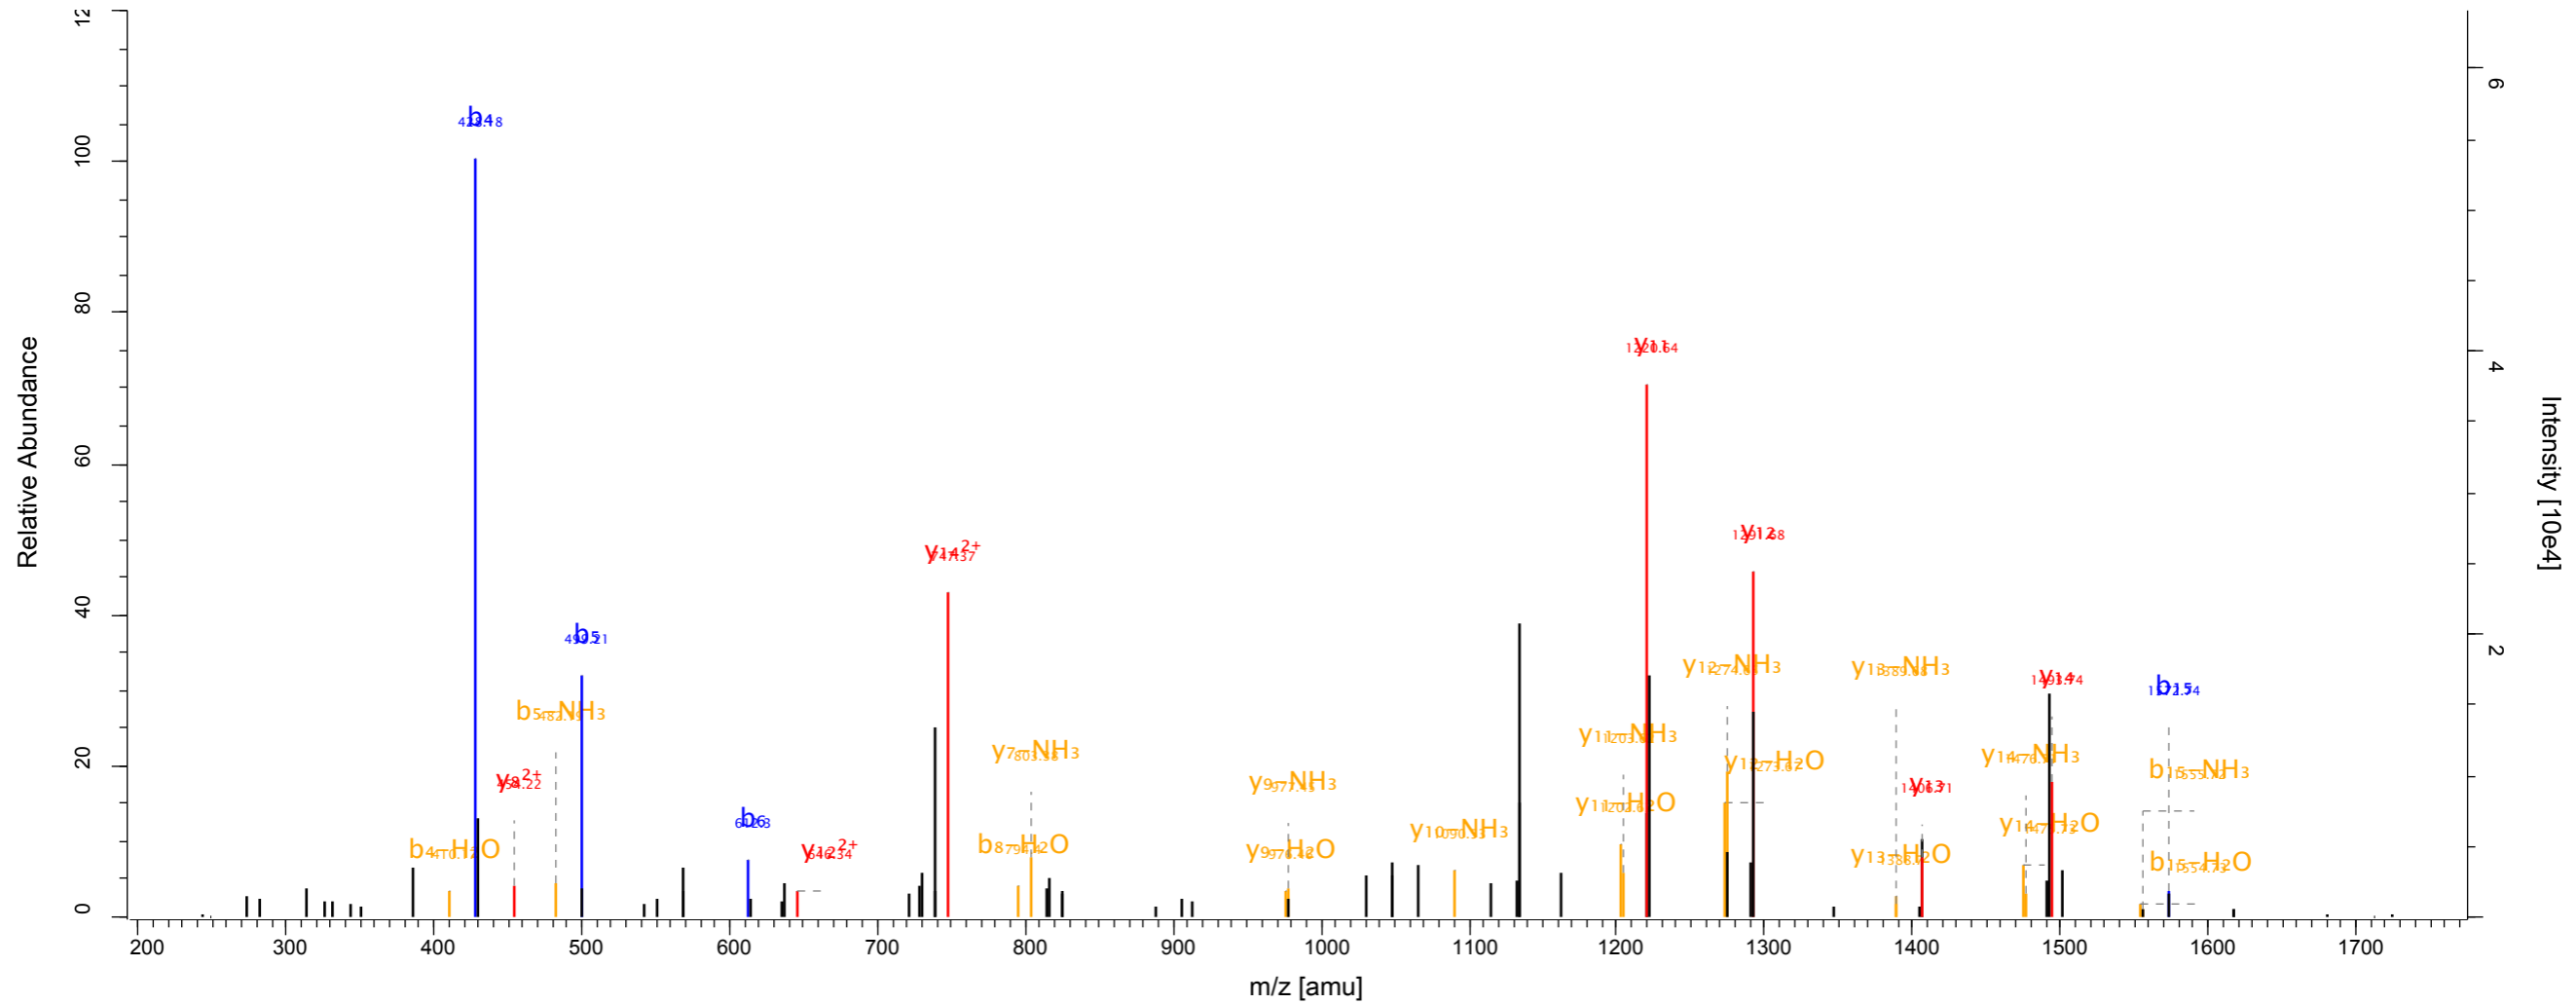

Scan number 8181 Raw file SKaraca\_LMB\_H1\_Reverse\_041011\_16\_rep2  
 Method ITMS; CID Pepti... 189.09

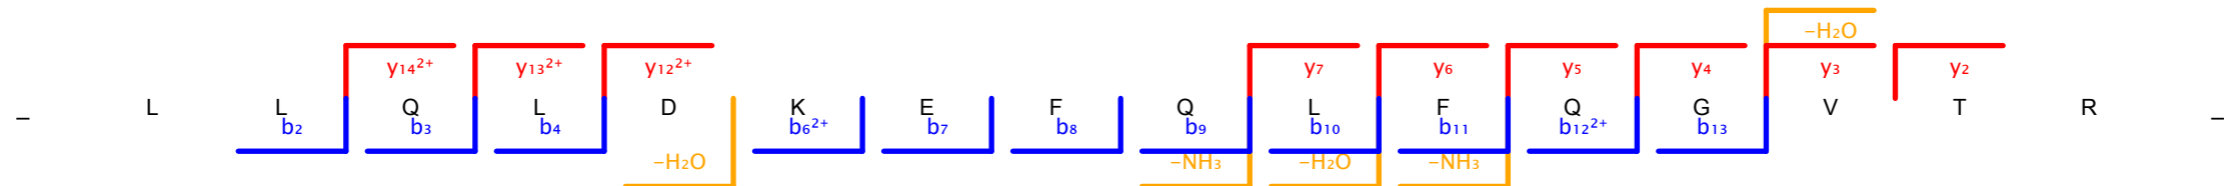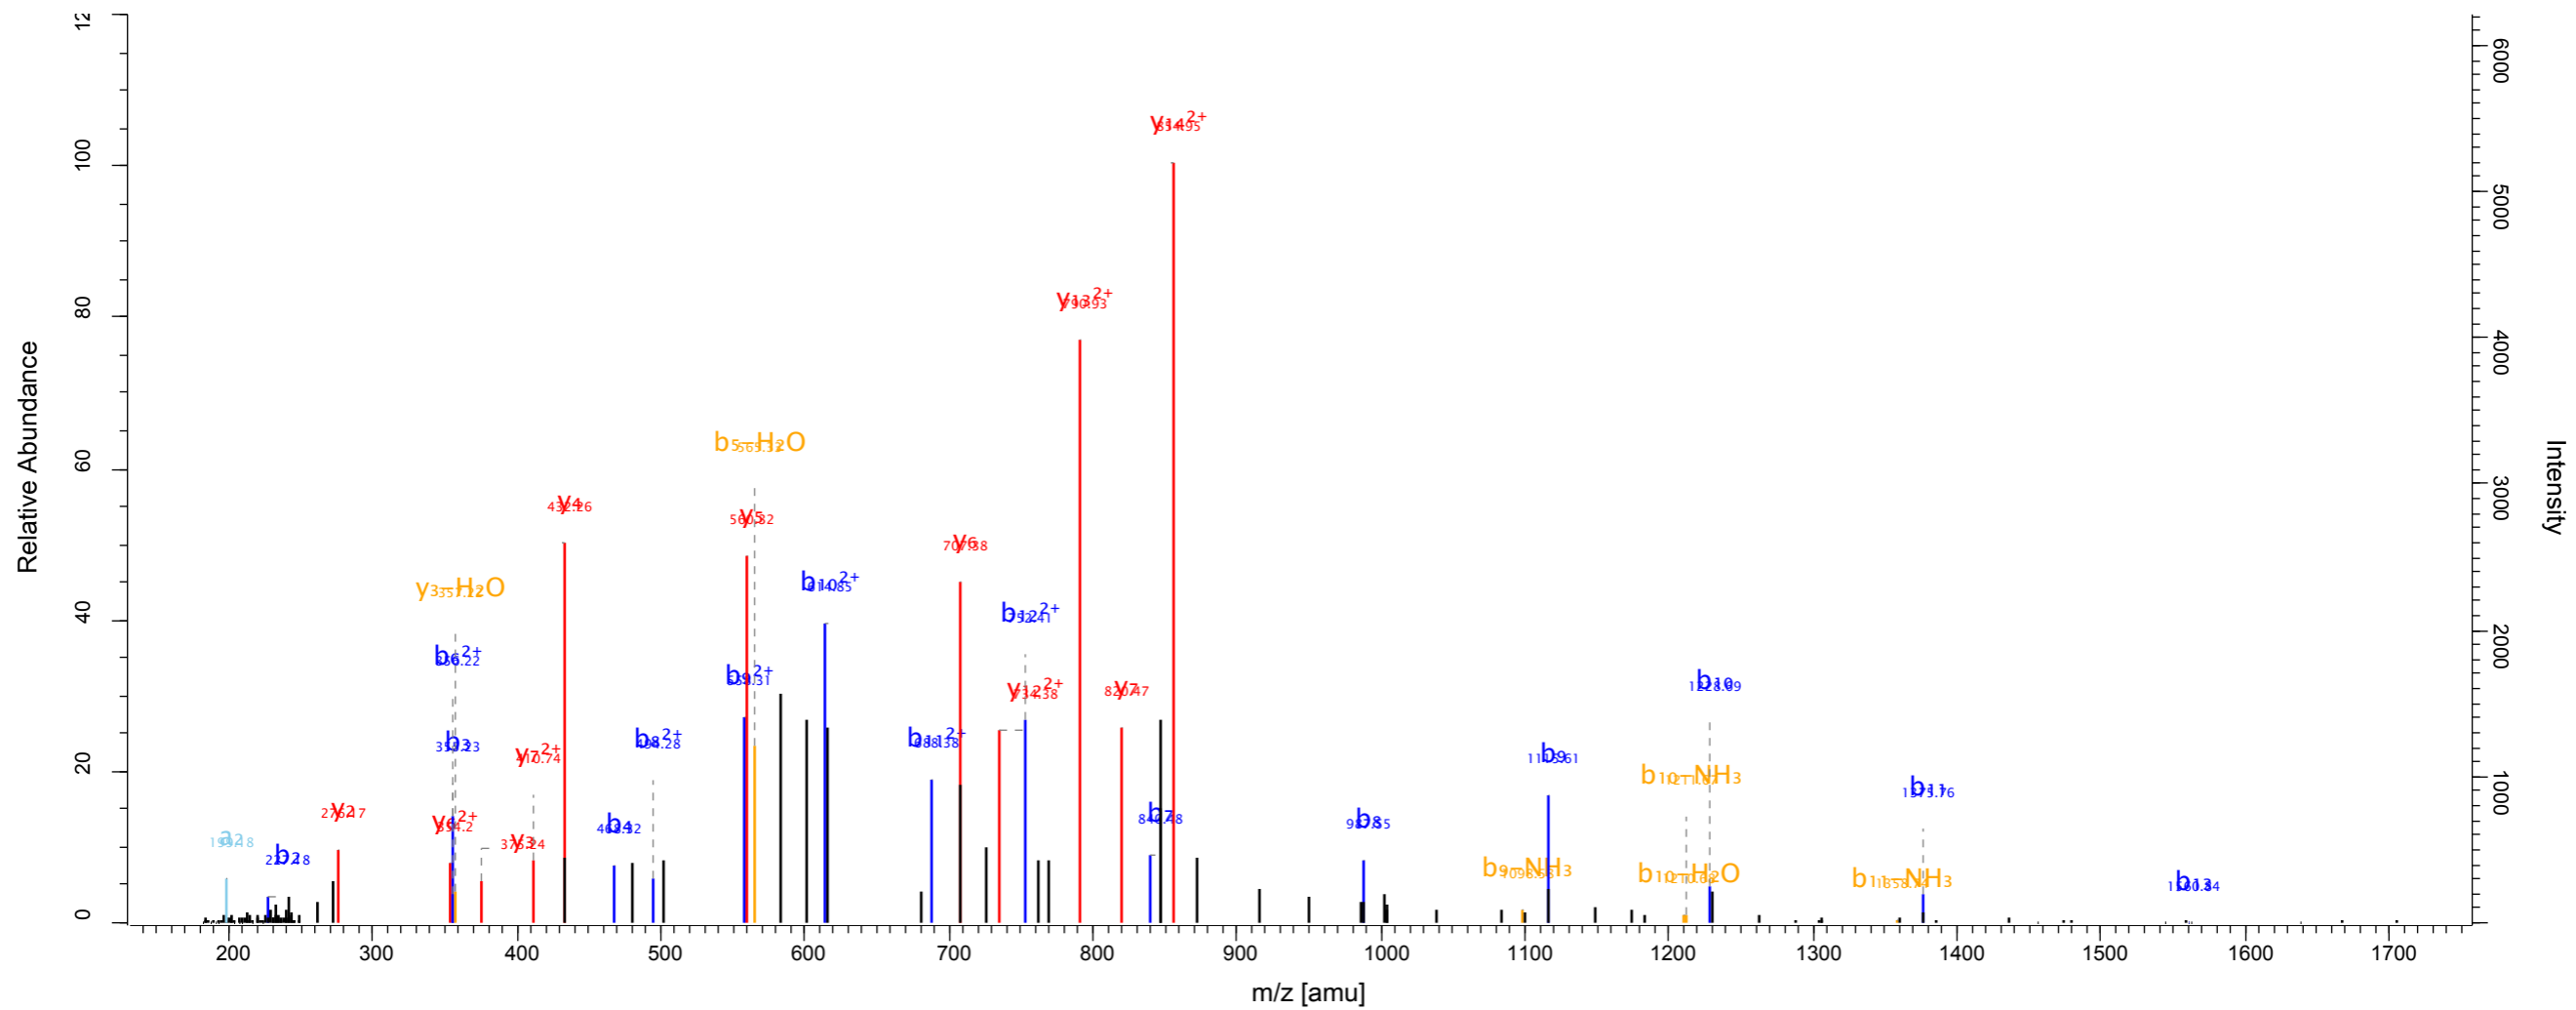

Scan number 1112 Raw file SKaraca\_LMB\_H1\_Reverse\_041011\_17\_rep1  
 Method ITMS; CID Pepti... 129.82

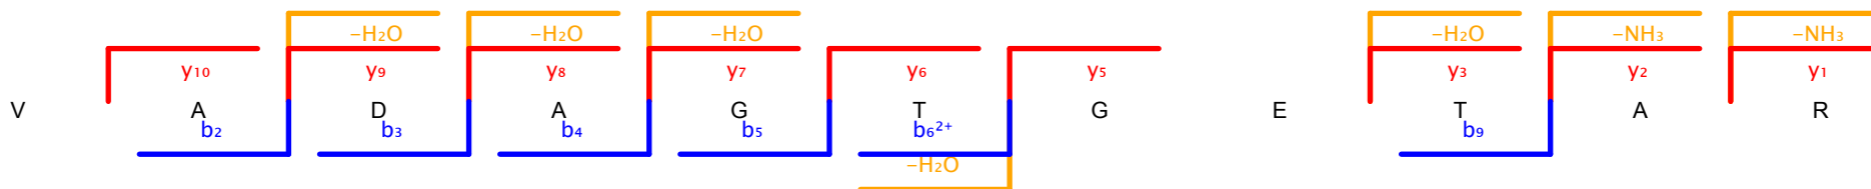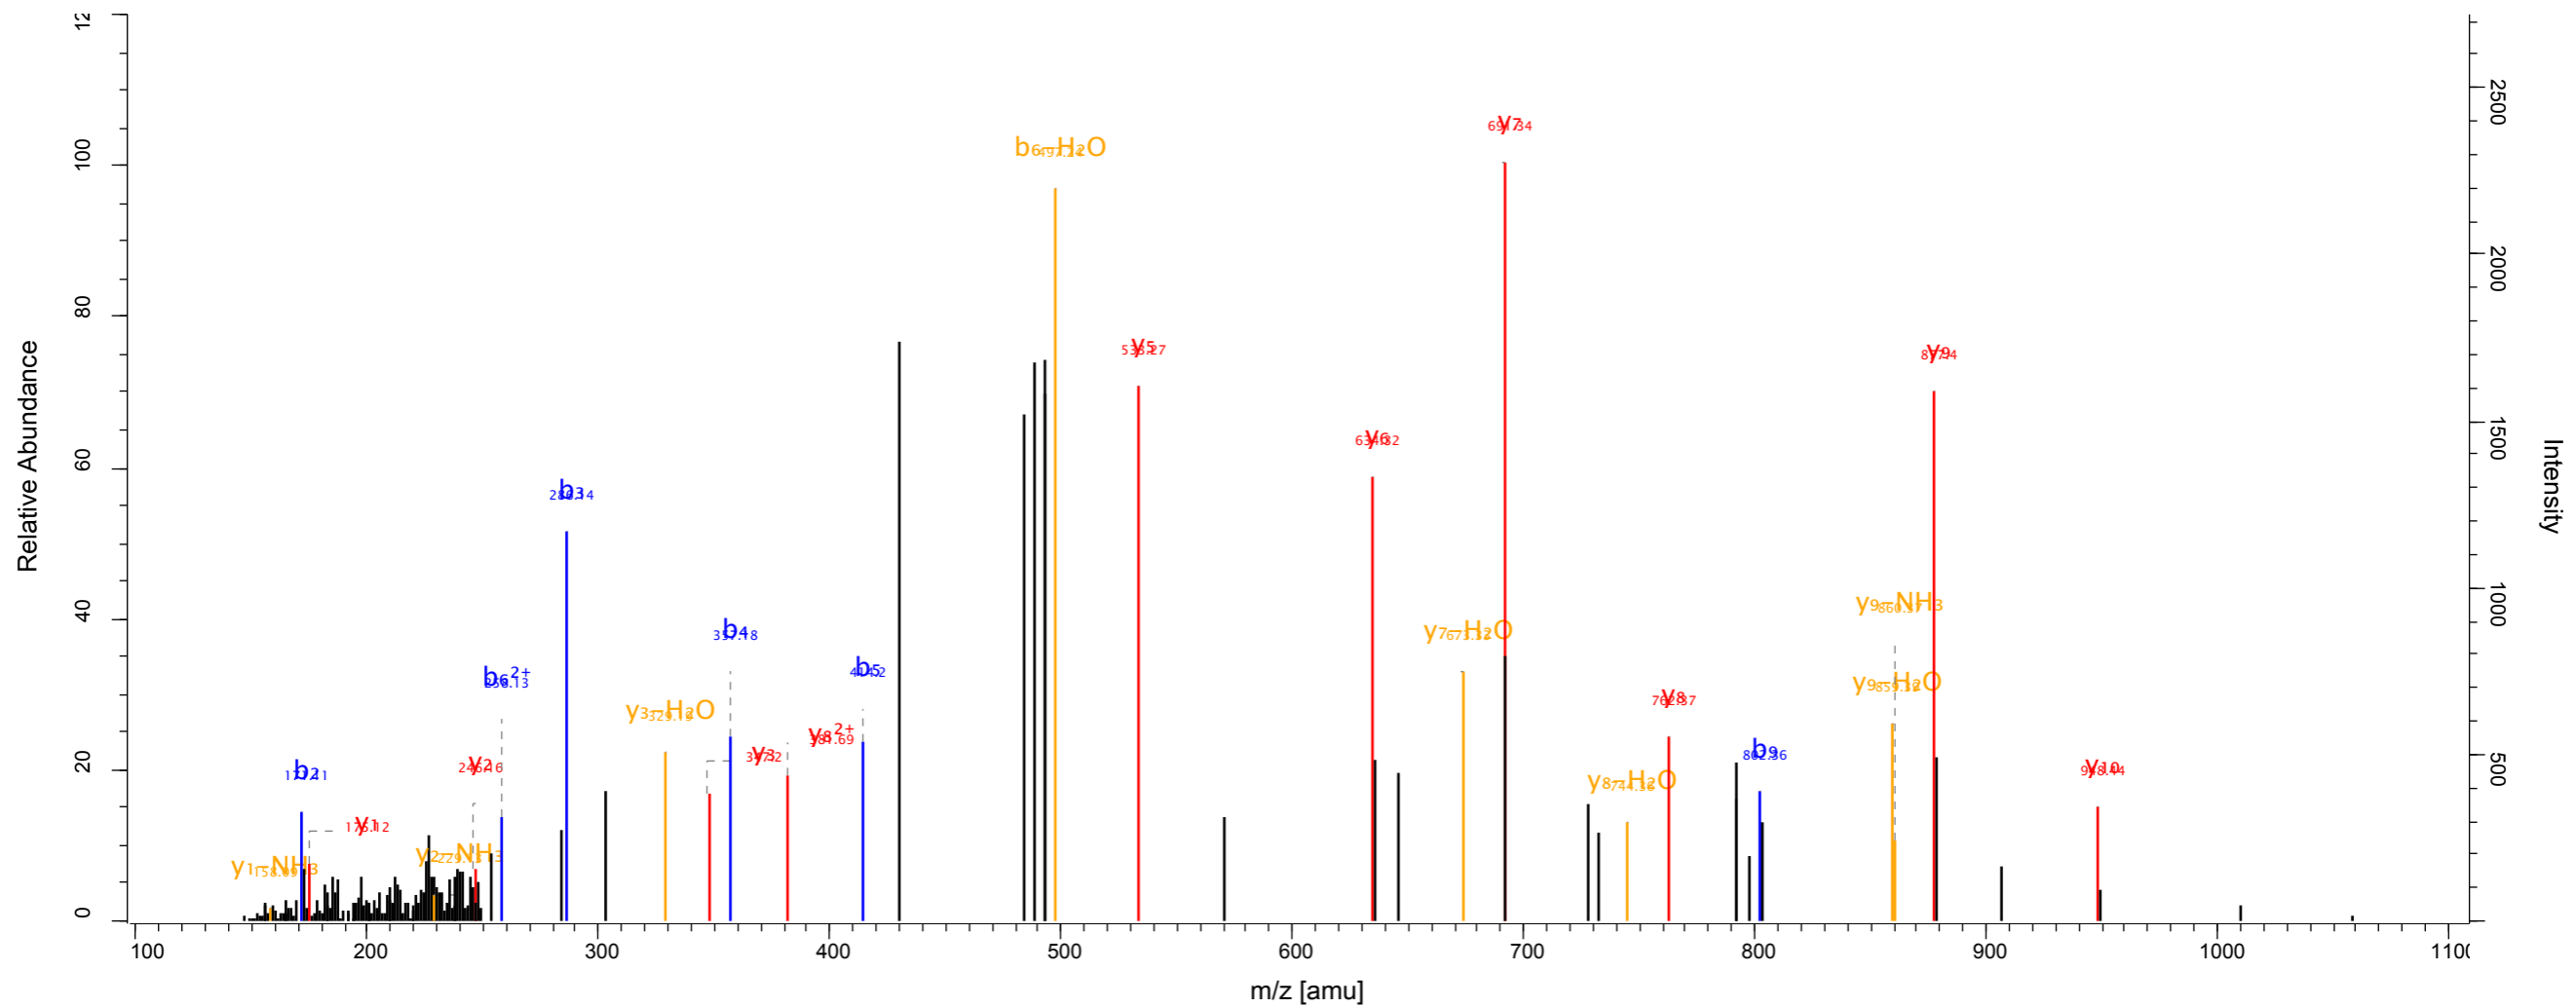

Scan number 1077 Raw file SKaraca\_LMB\_H1\_Reverse\_041011\_17\_rep2  
 Method ITMS; CID Pepti... 196.88

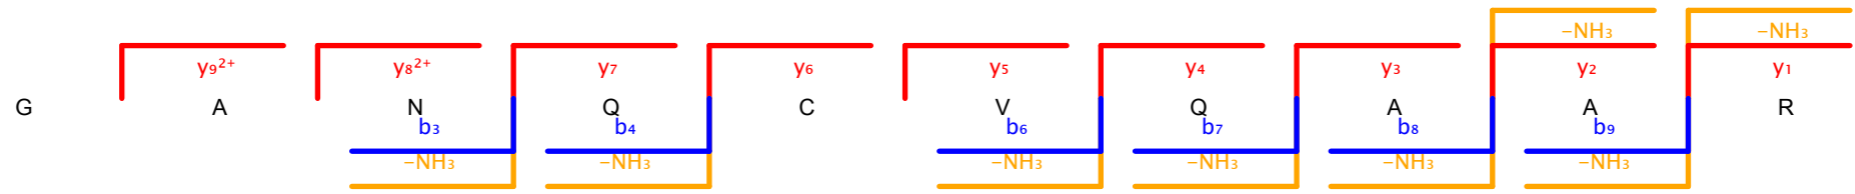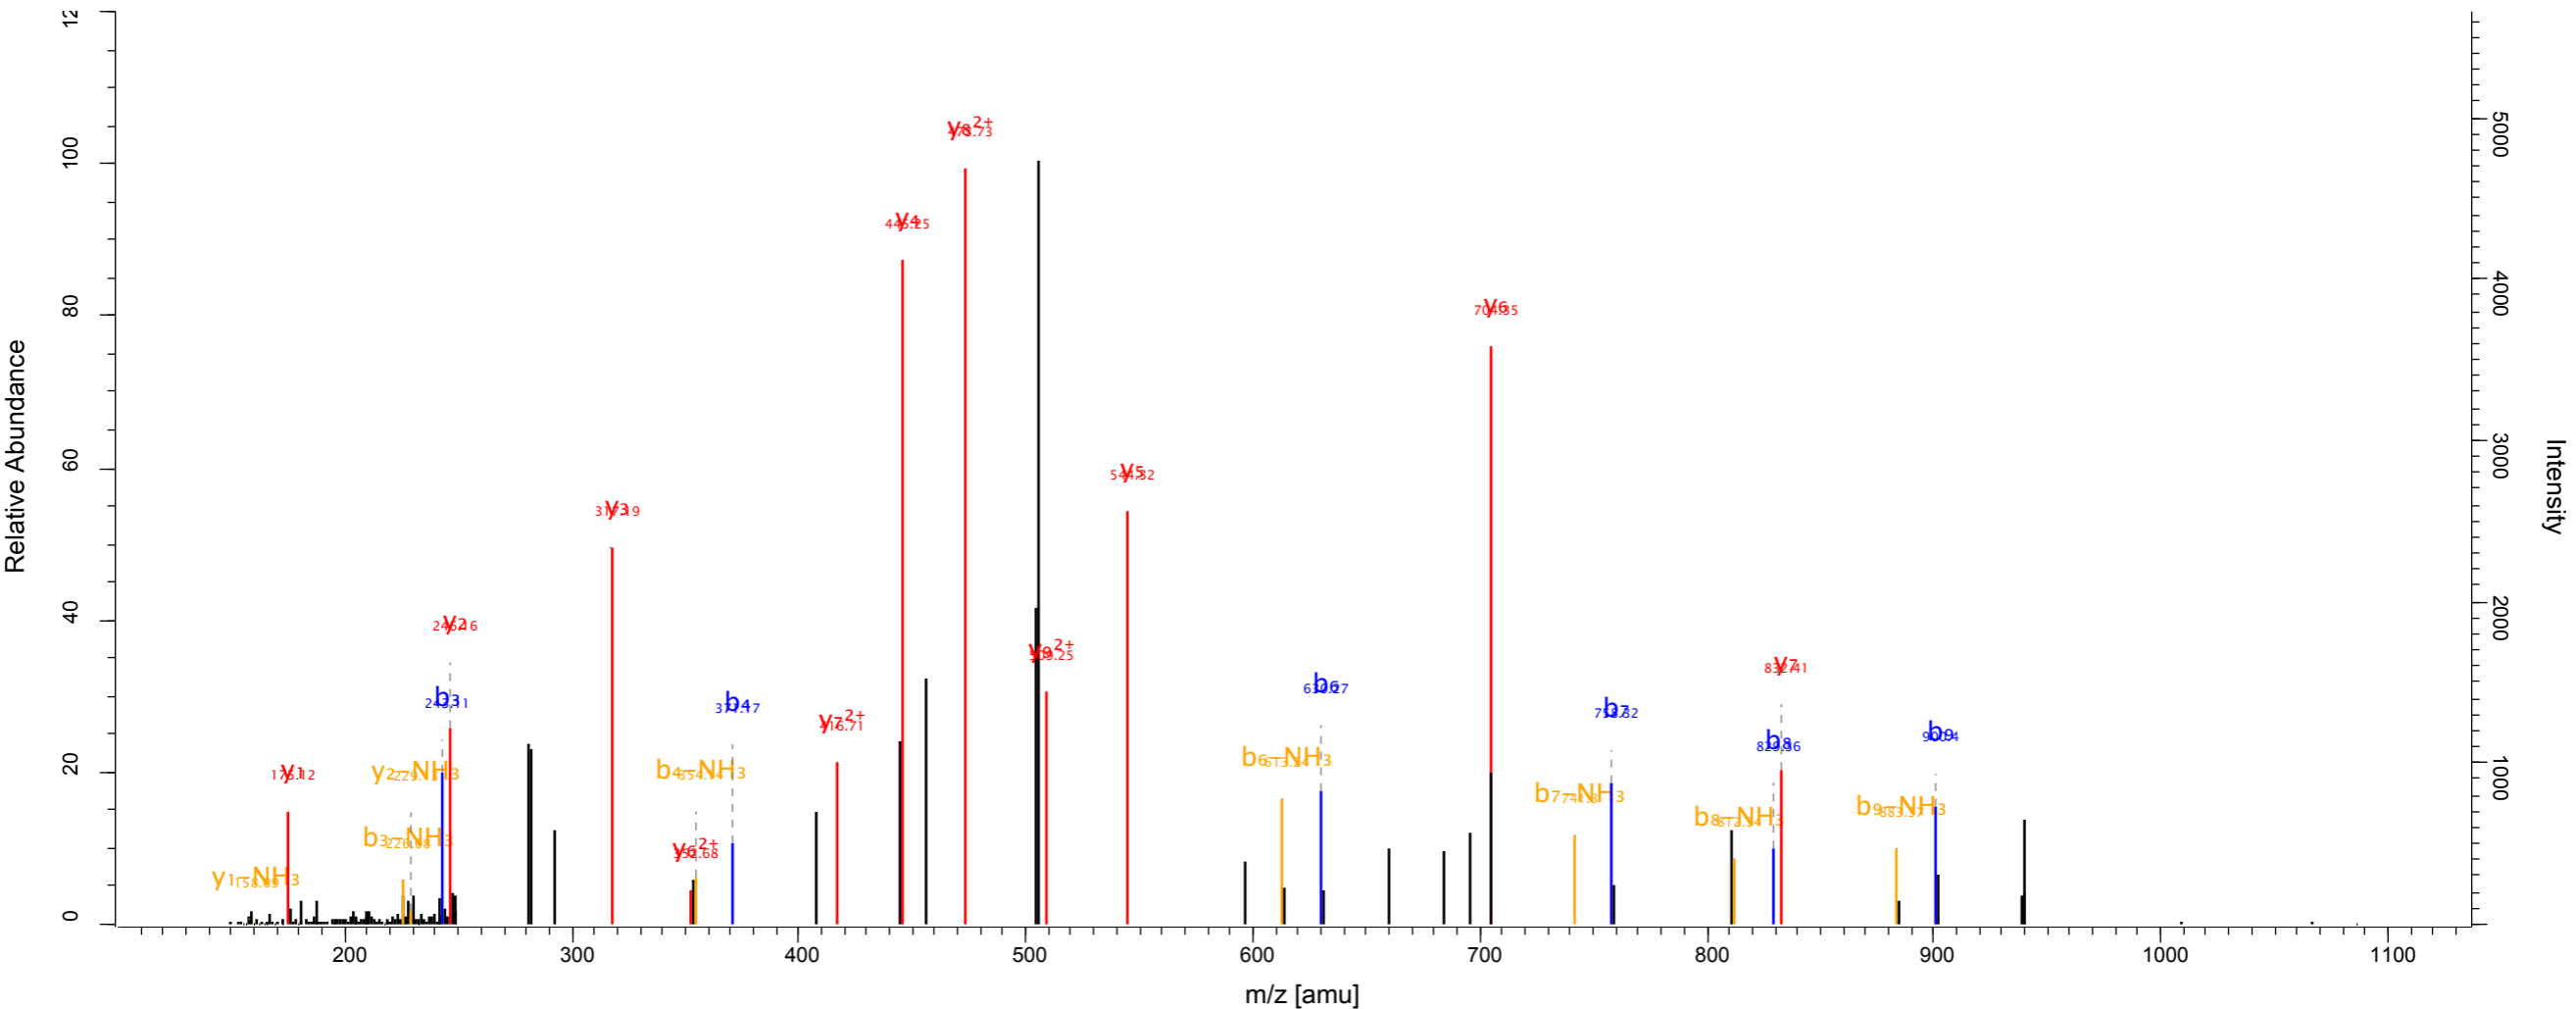

|             |           |          |                                       |
|-------------|-----------|----------|---------------------------------------|
| Scan number | 2486      | Raw file | SKaraca_LMB_H1_Reverse_041011_17_rep2 |
| Method      | ITMS; CID | Pepti... | 122.64                                |

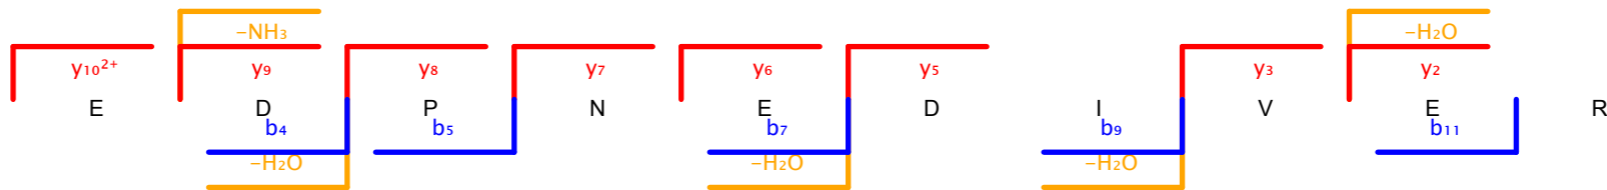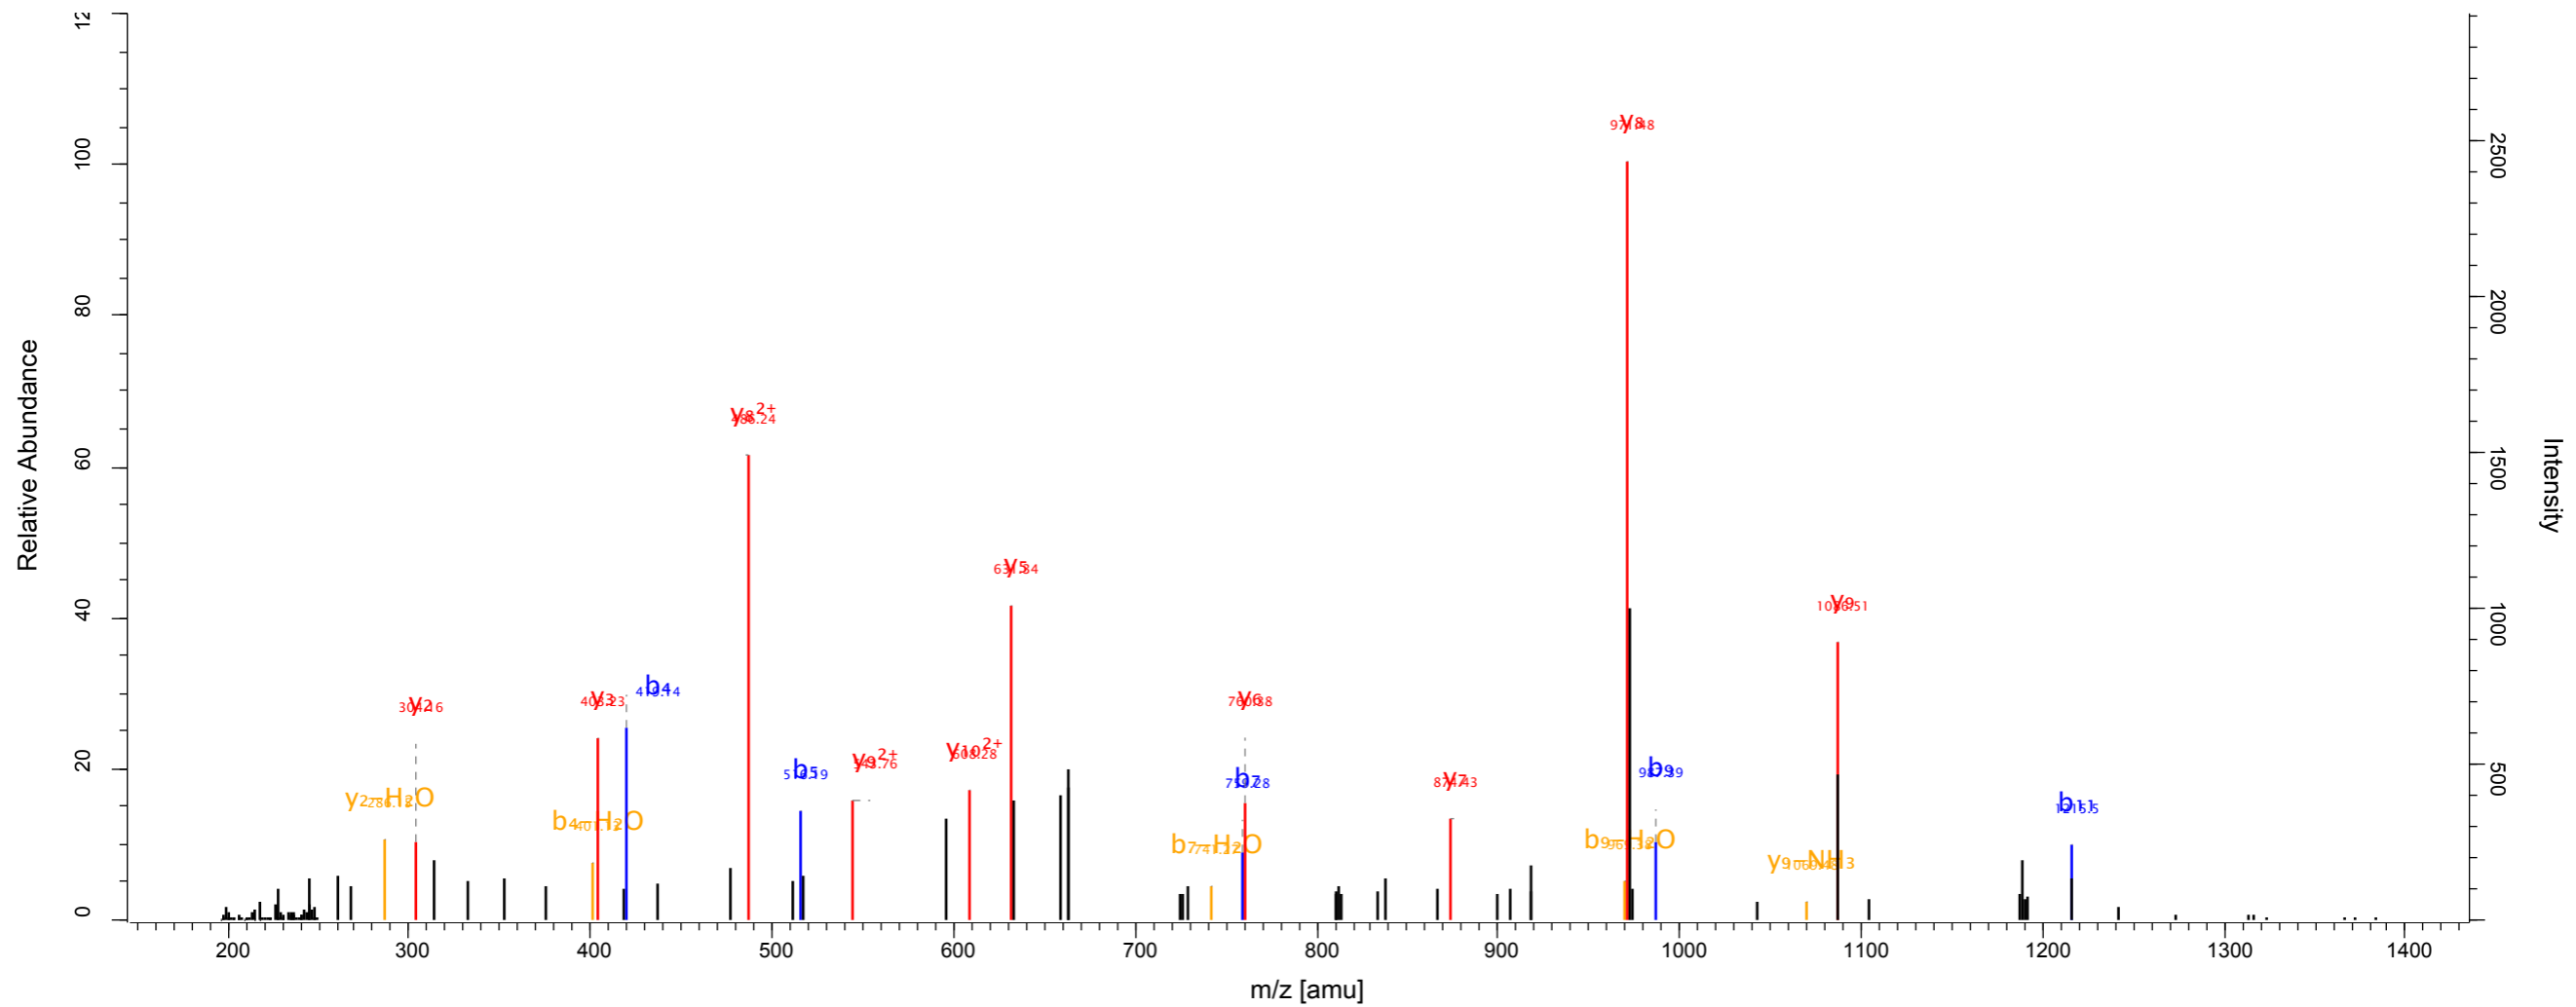



|             |           |          |                                       |
|-------------|-----------|----------|---------------------------------------|
| Scan number | 5534      | Raw file | SKaraca_LMB_H1_Reverse_041011_17_rep2 |
| Method      | ITMS; CID | Pepti... | 125.97                                |

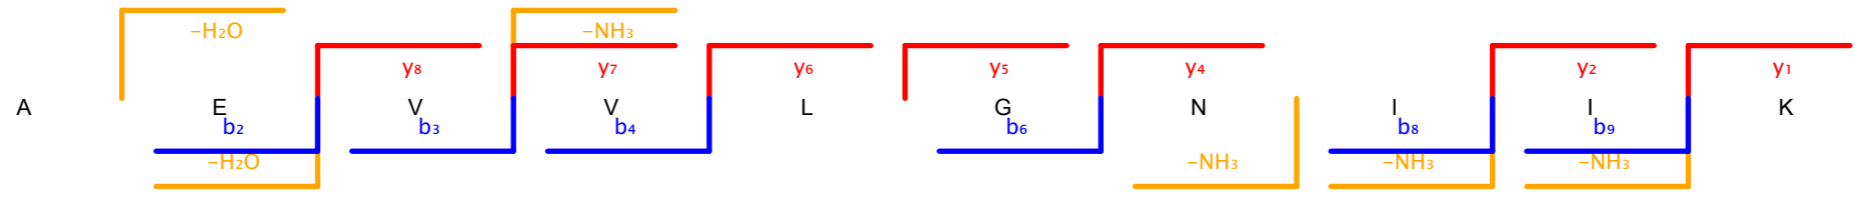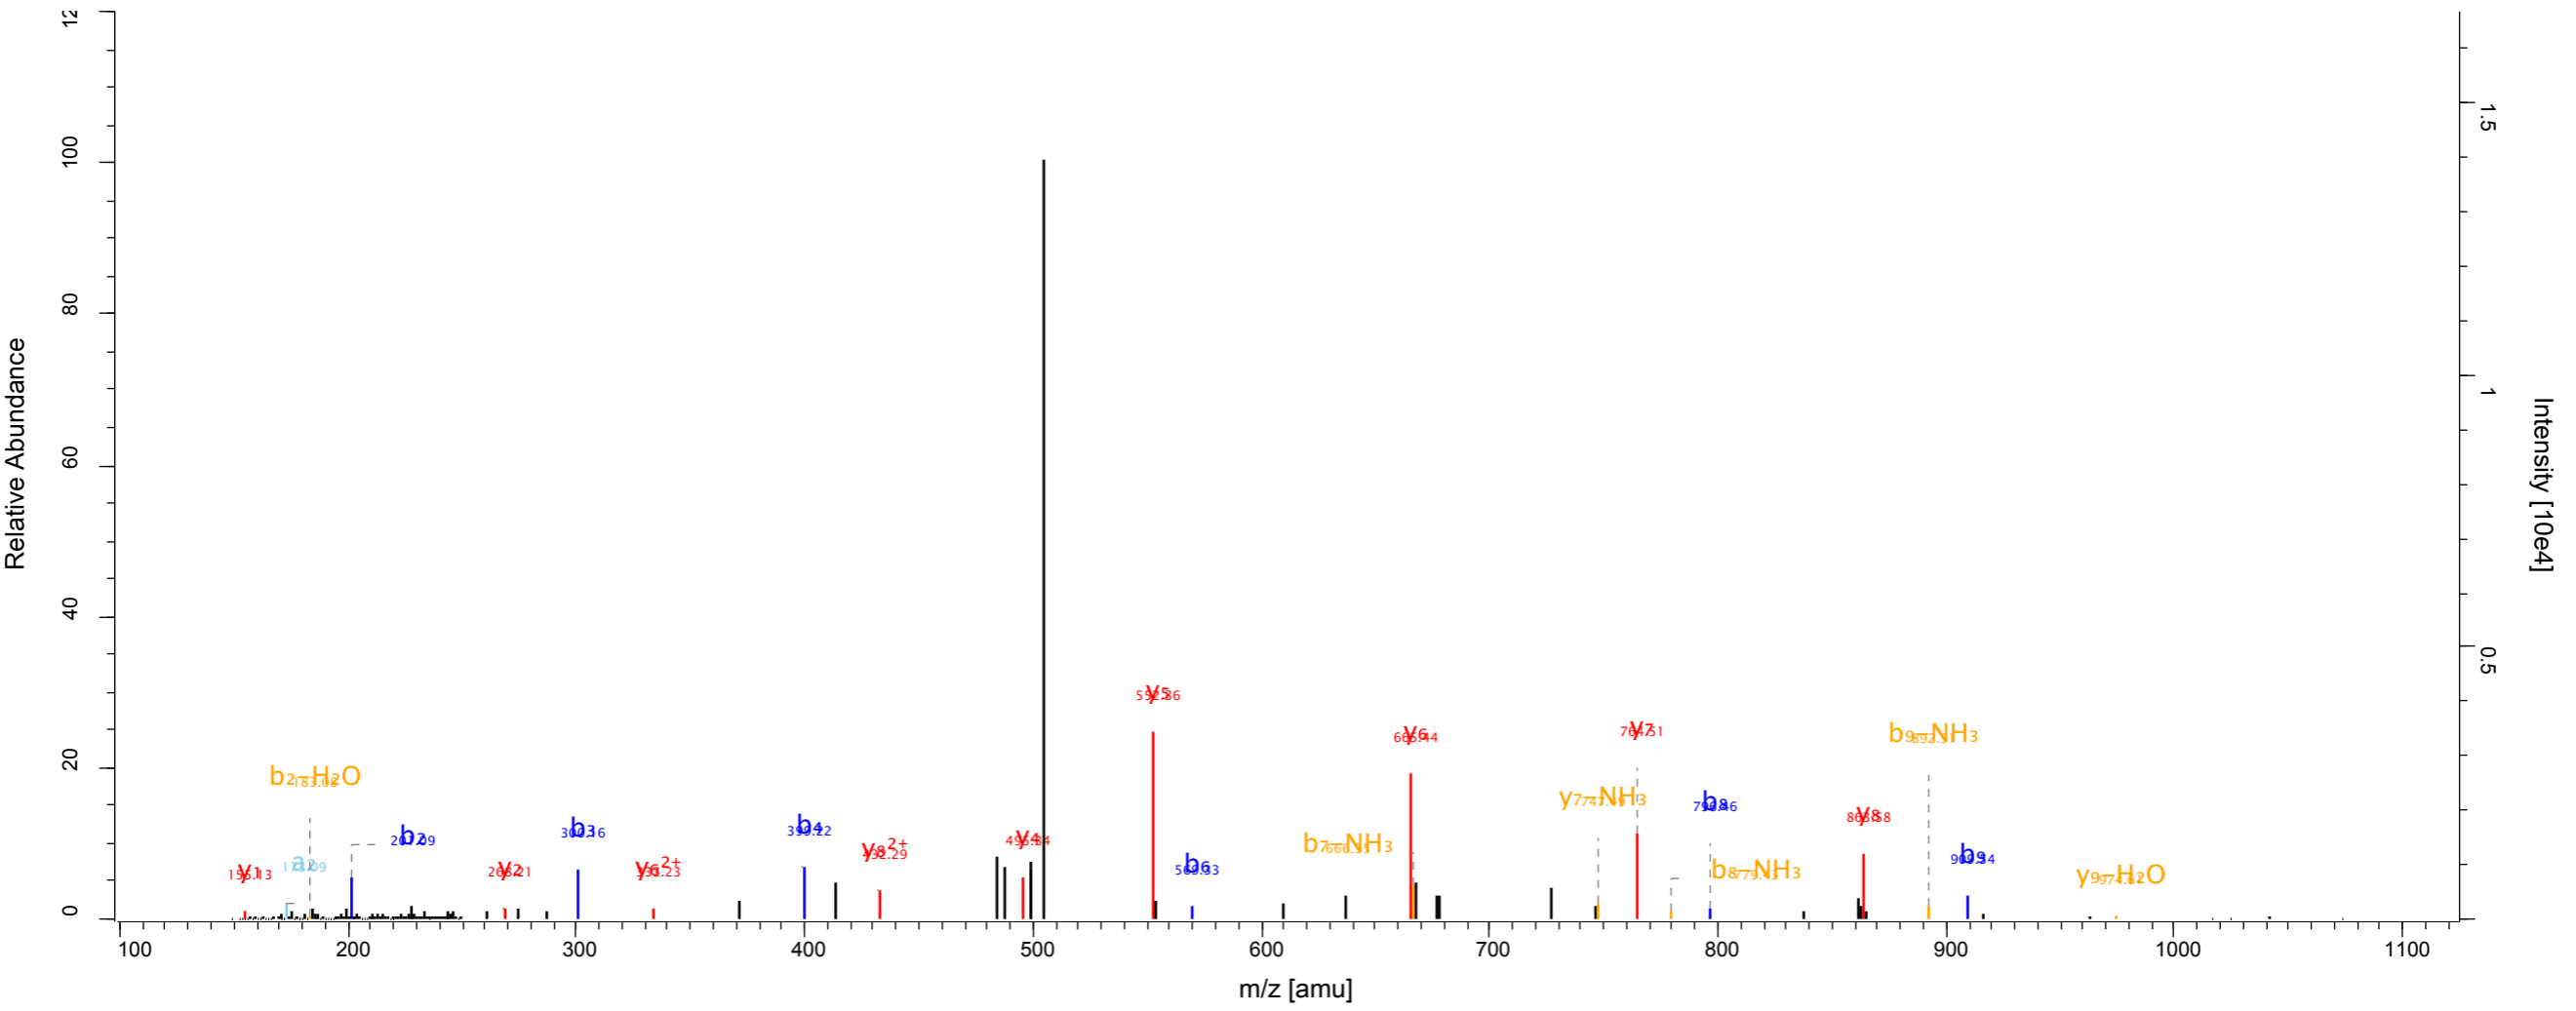

Scan number 3861 Raw file SKaraca\_LMB\_H1\_Reverse\_041011\_18\_rep2  
 Method ITMS; CID Pepti... 106.32

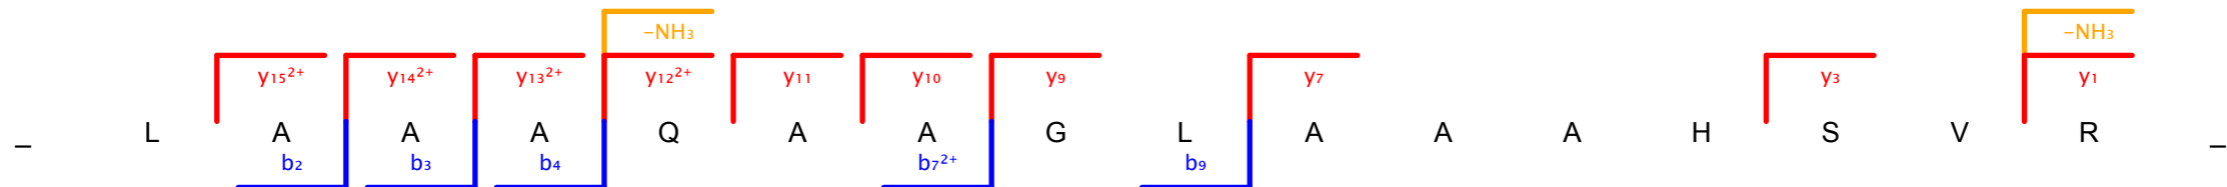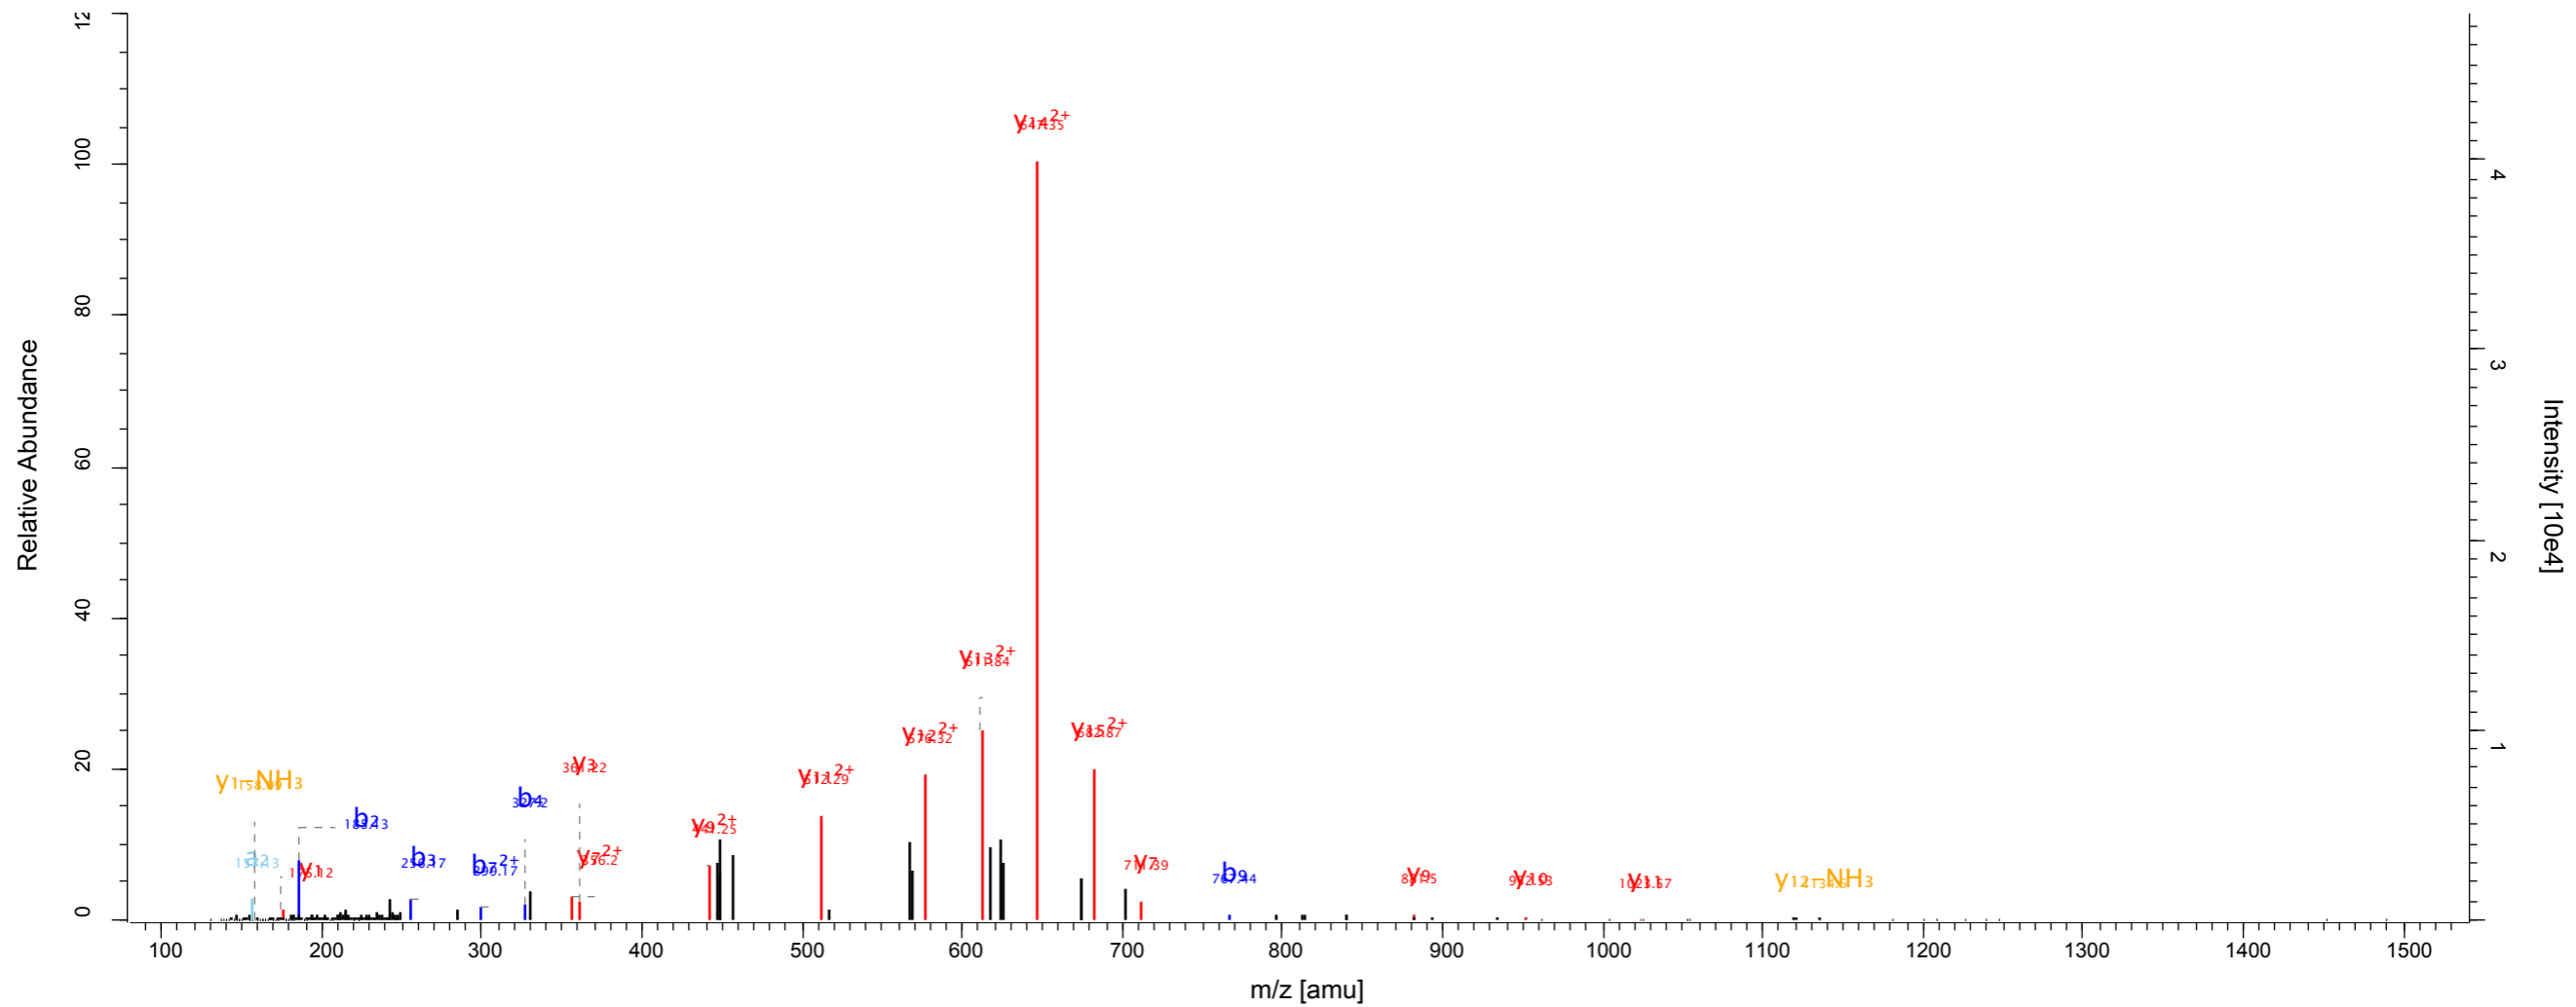

Scan number 5734 Raw file SKaraca\_LMB\_H1\_Reverse\_041011\_19\_rep2  
 Method ITMS; CID Pepti... 159.69

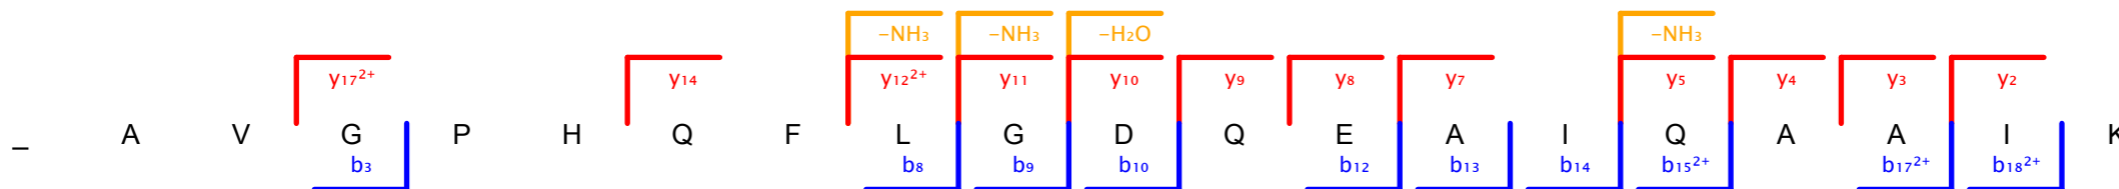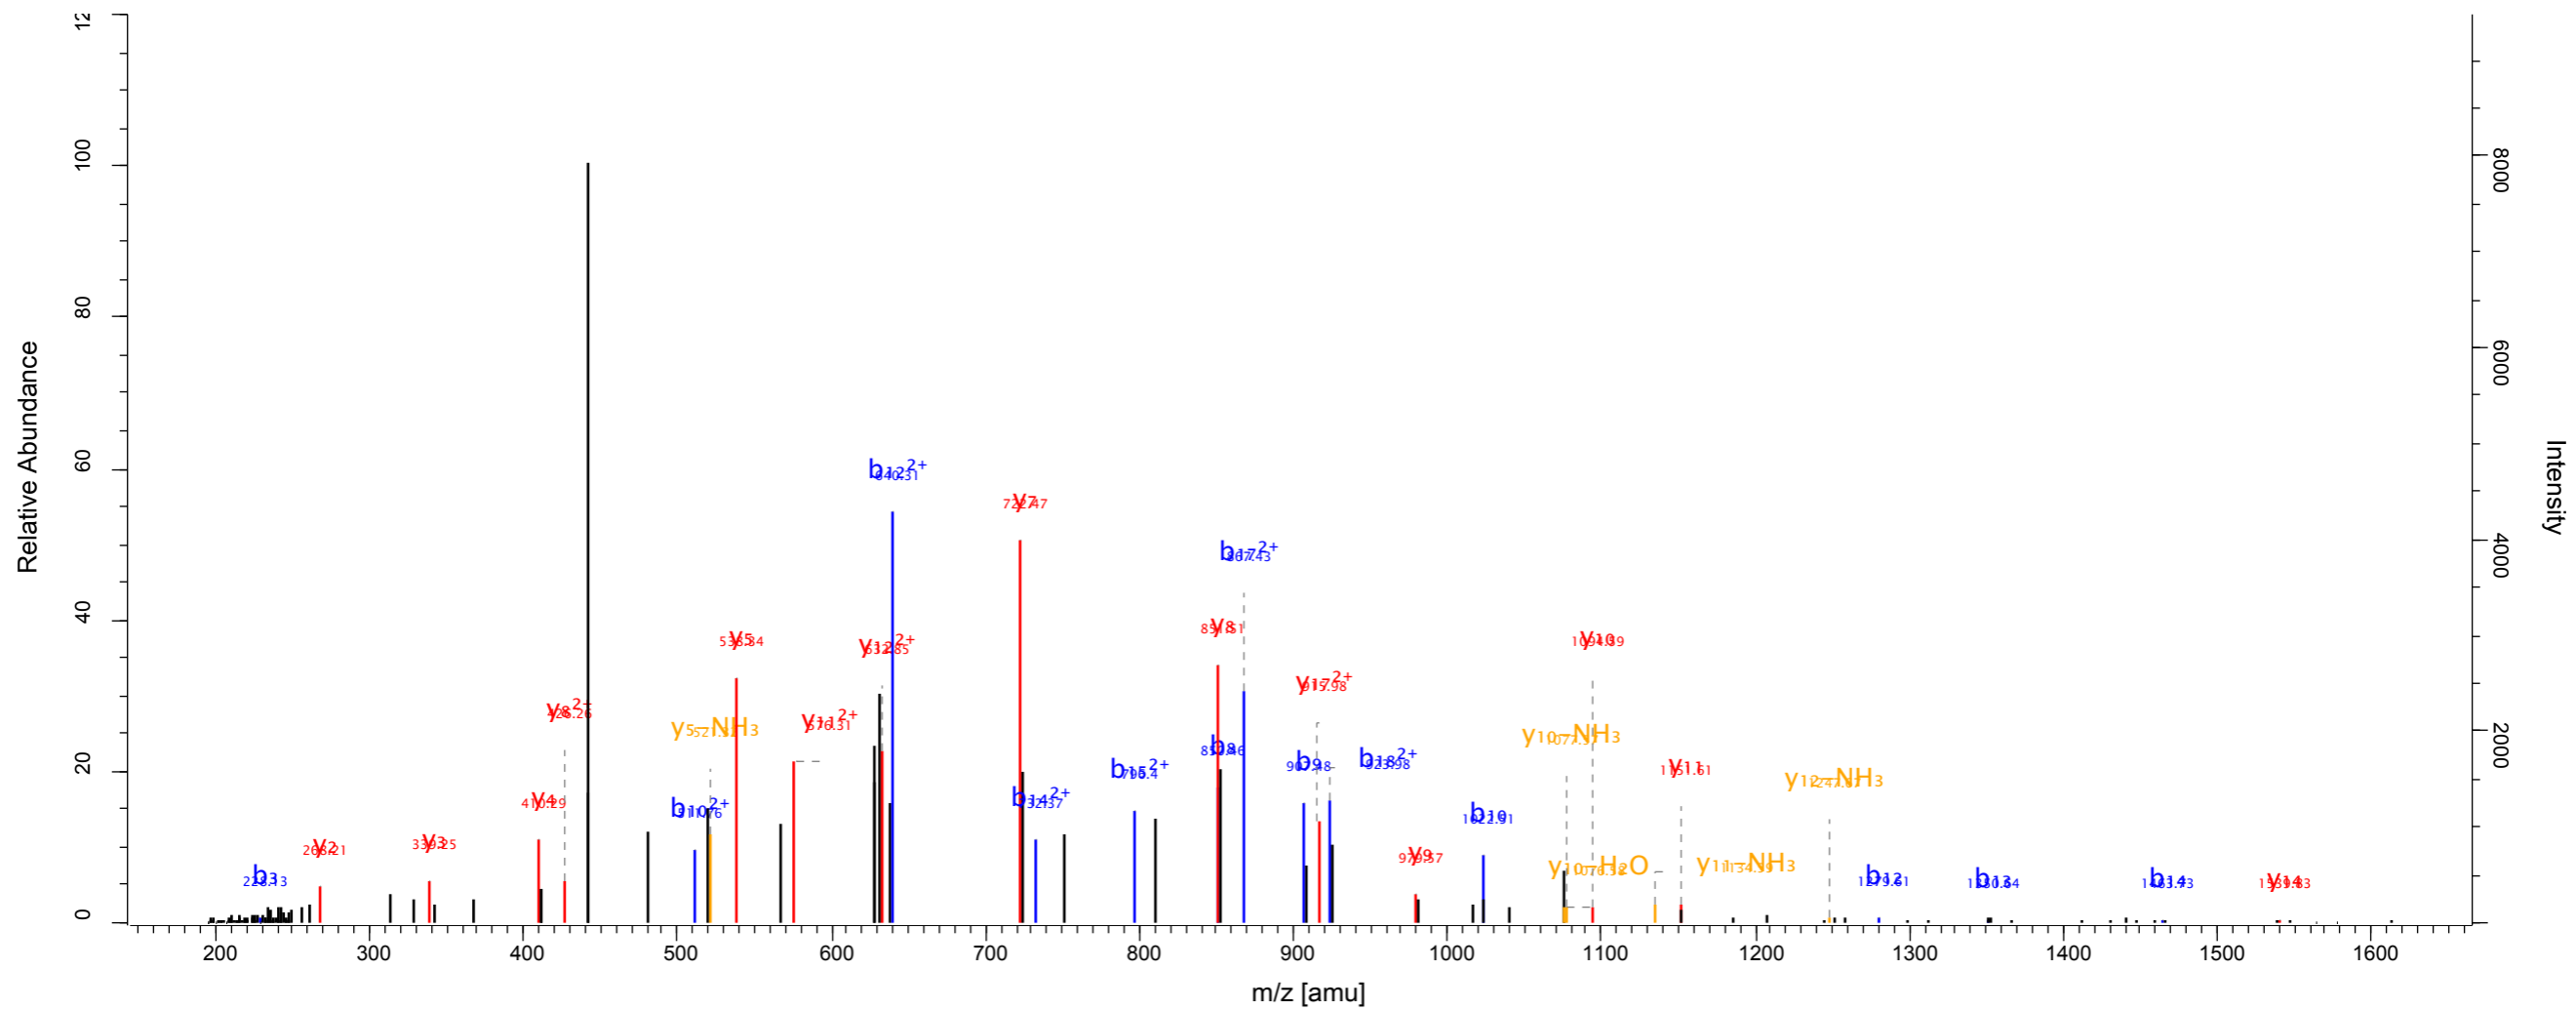

Scan number 8216 Raw file SKaraca\_LMB\_H1\_Reverse\_041011\_20\_rep1  
 Method ITMS; CID Pepti... 145.09

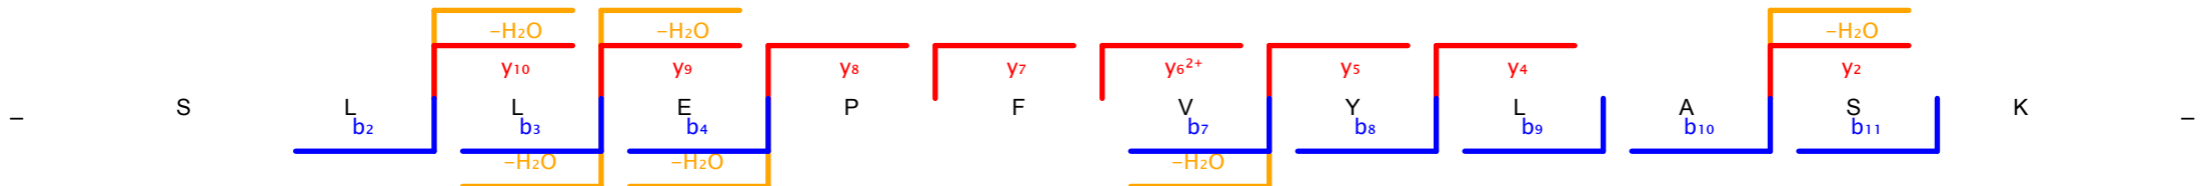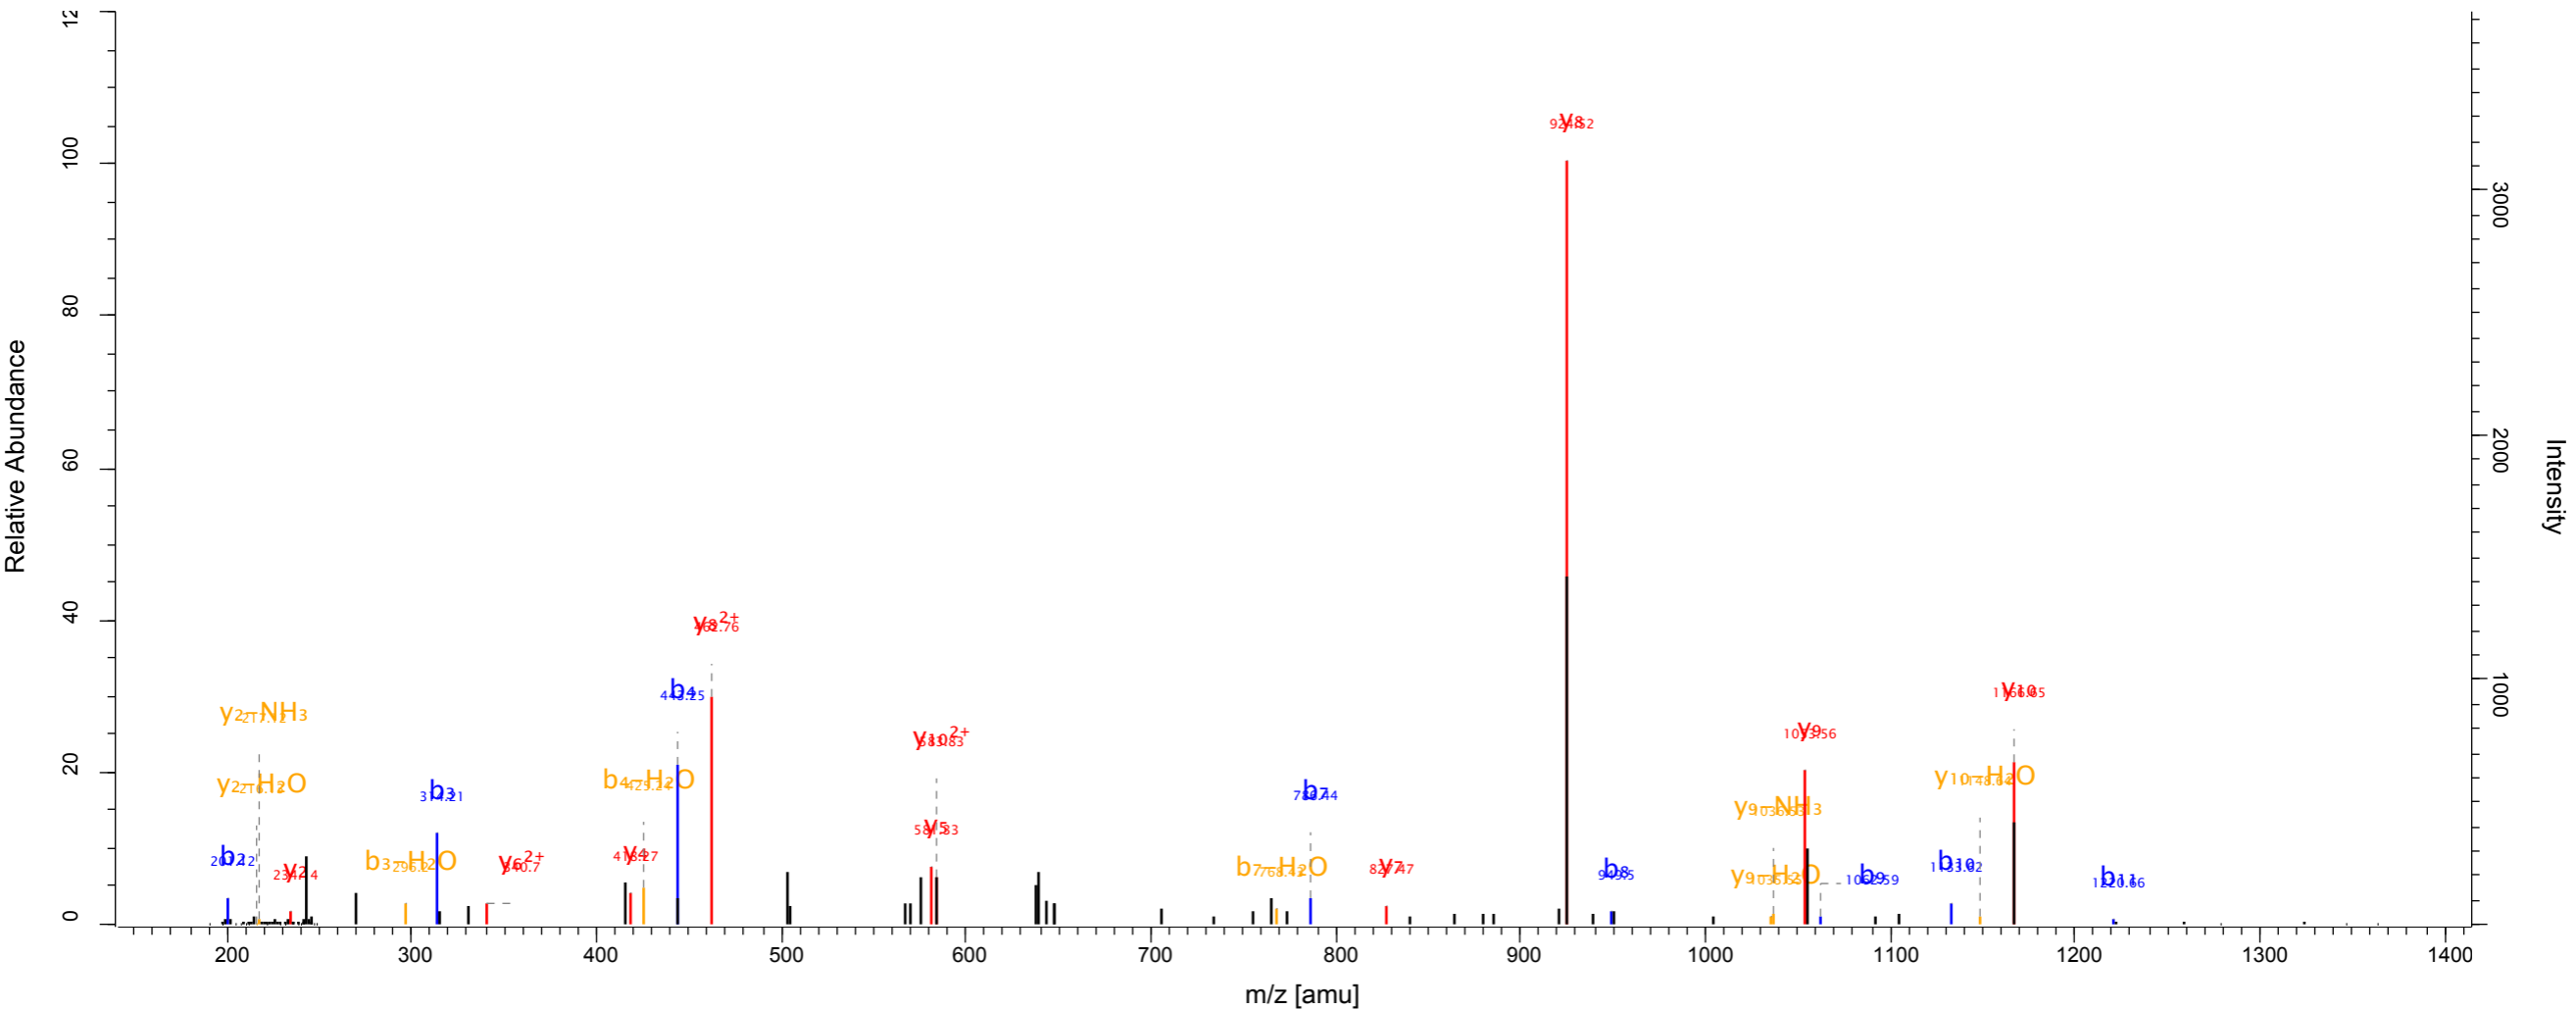

|             |           |          |                                       |
|-------------|-----------|----------|---------------------------------------|
| Scan number | 6997      | Raw file | SKaraca_LMB_H1_Reverse_041011_21_rep2 |
| Method      | ITMS; CID | Pepti... | 74.52                                 |

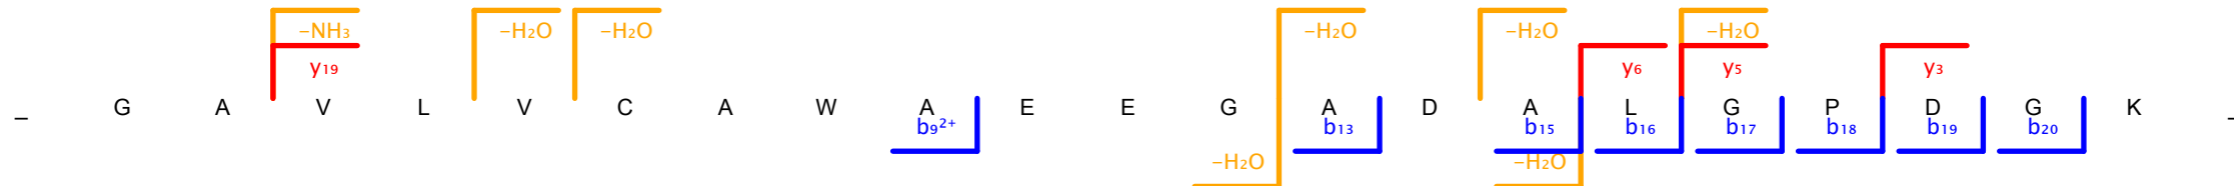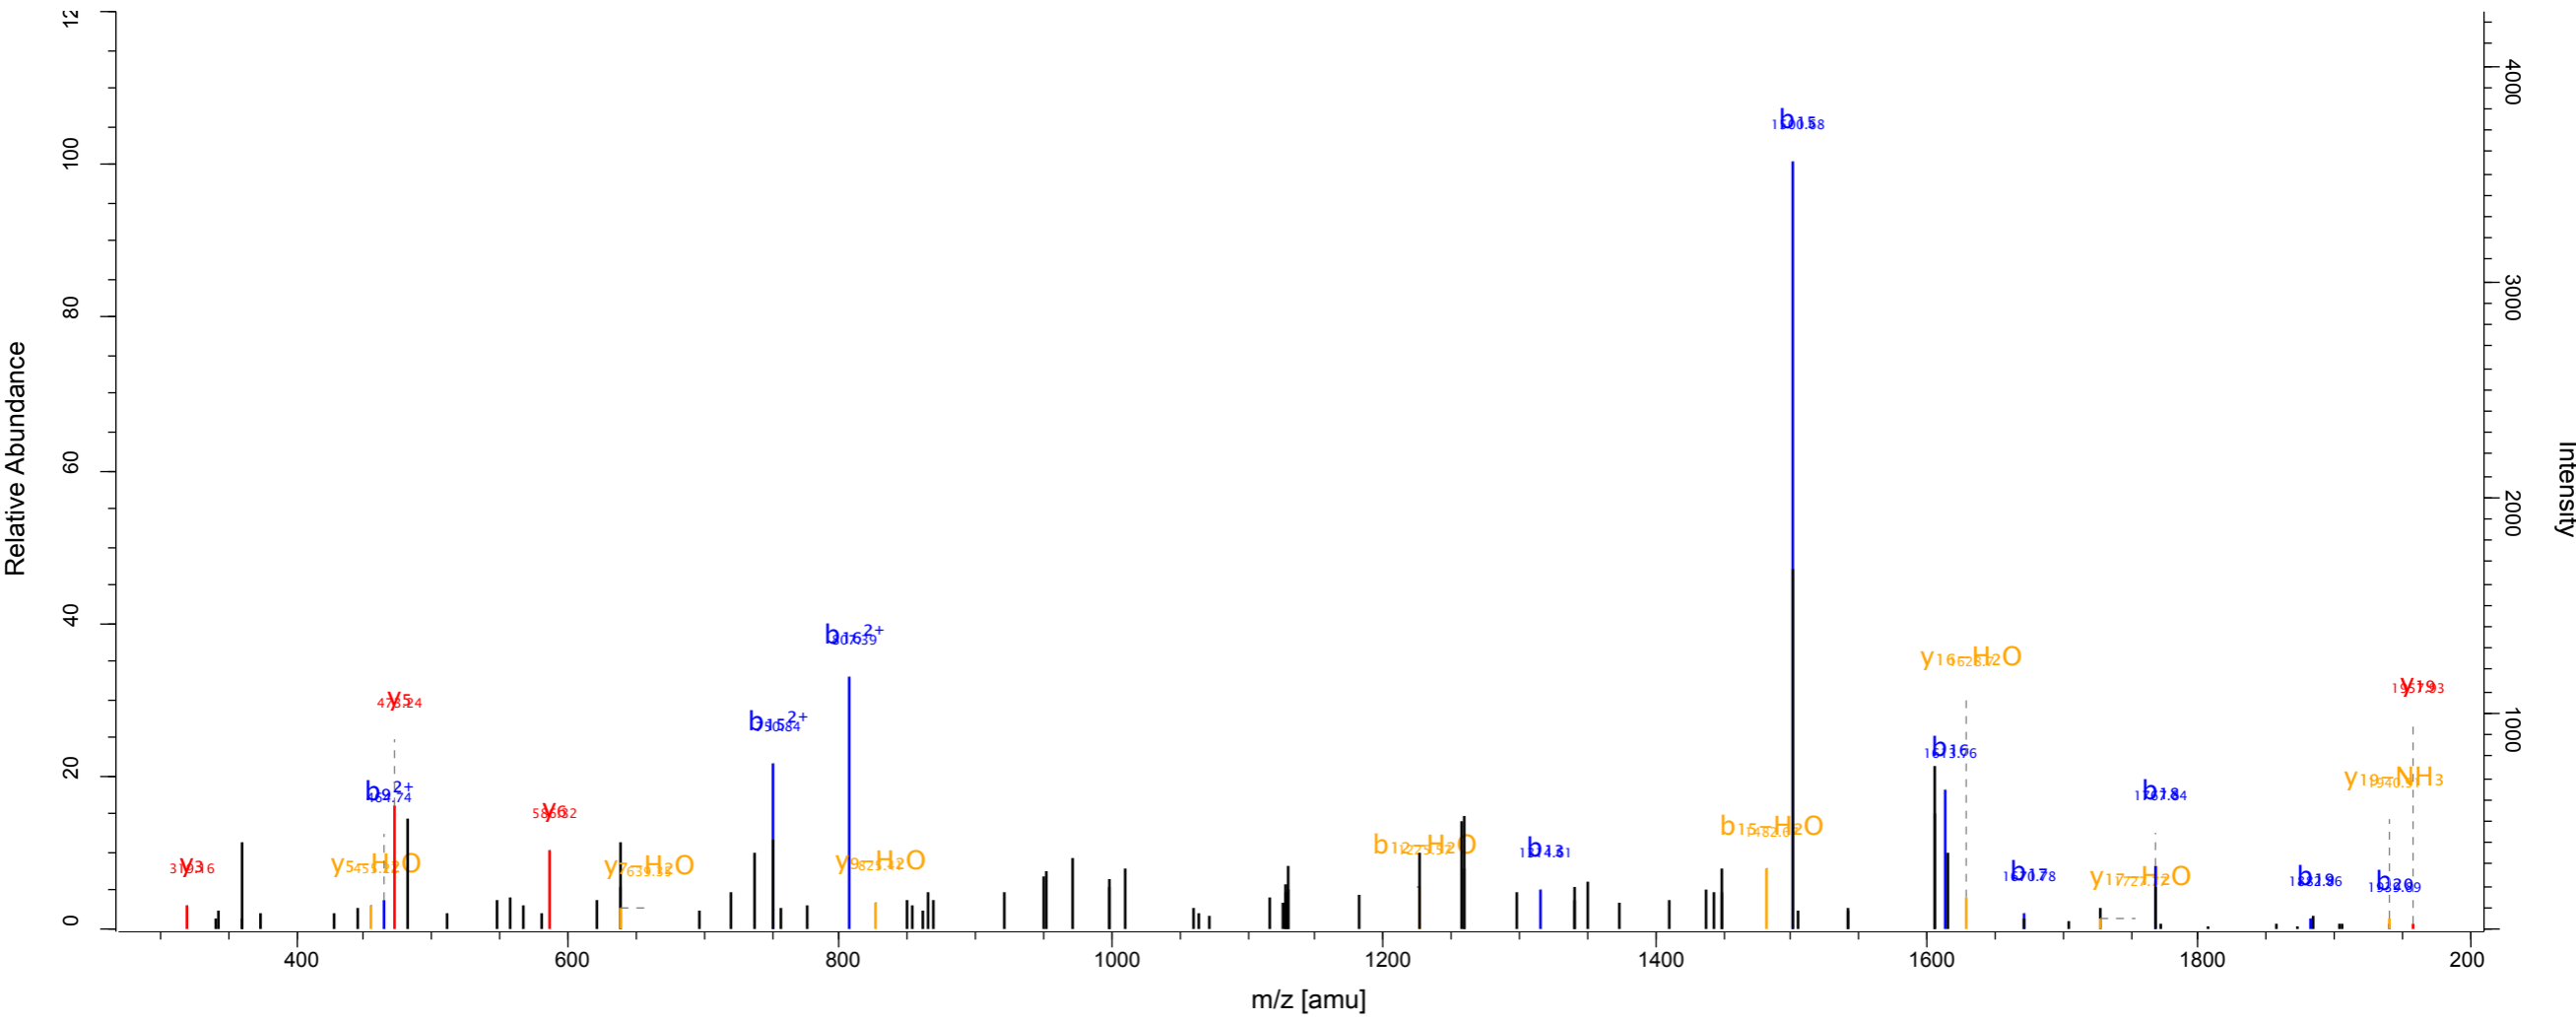

|             |           |          |                                       |
|-------------|-----------|----------|---------------------------------------|
| Scan number | 5509      | Raw file | SKaraca_LMB_H1_Reverse_041011_22_rep1 |
| Method      | ITMS; CID | Pepti... | 172.8                                 |

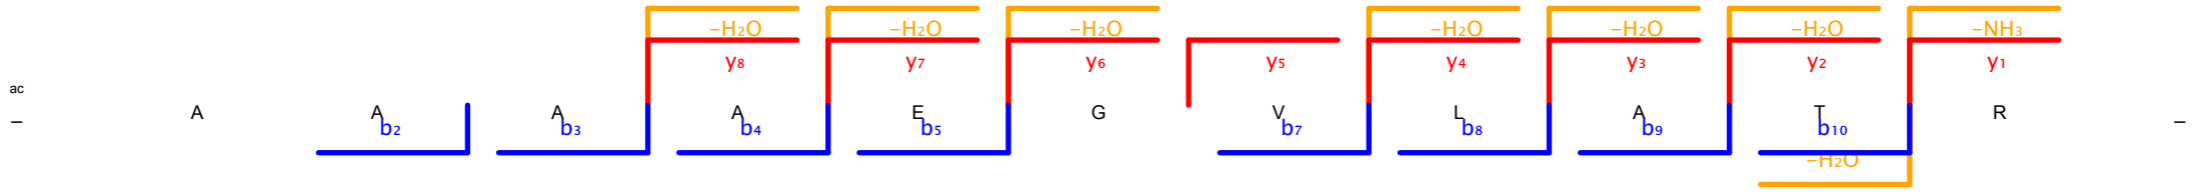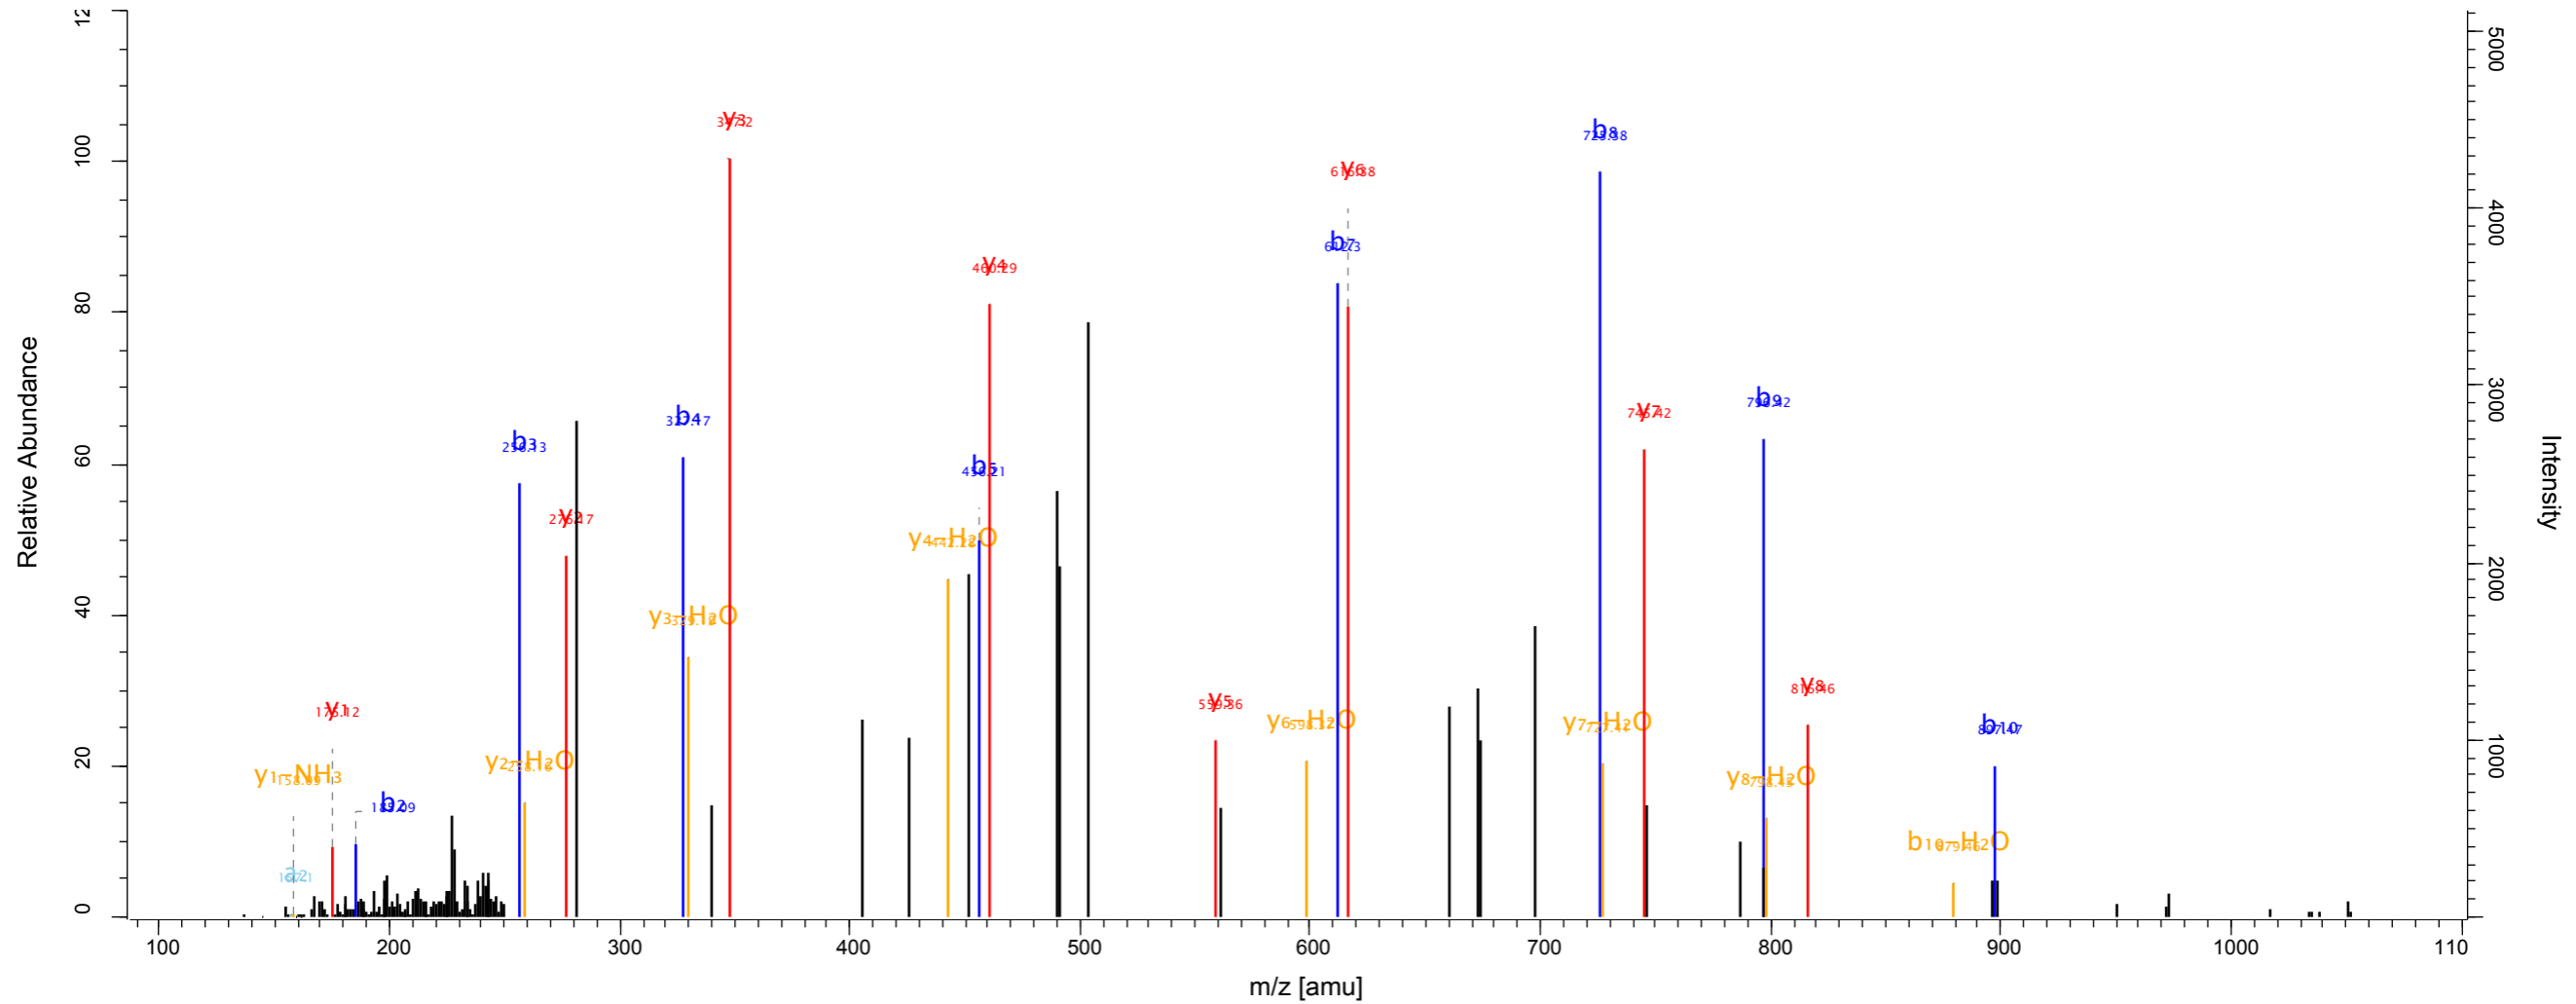

|             |           |          |                                       |
|-------------|-----------|----------|---------------------------------------|
| Scan number | 7549      | Raw file | SKaraca_LMB_H1_Reverse_041011_22_rep1 |
| Method      | ITMS; CID | Pepti... | 107.37                                |

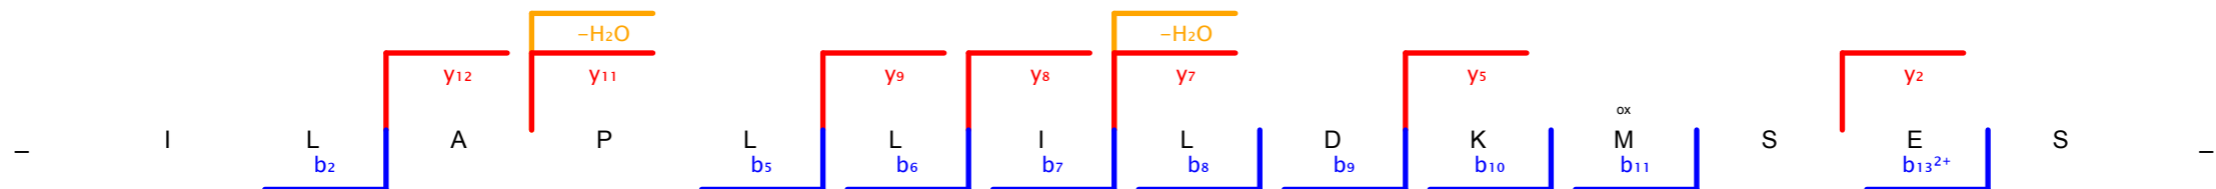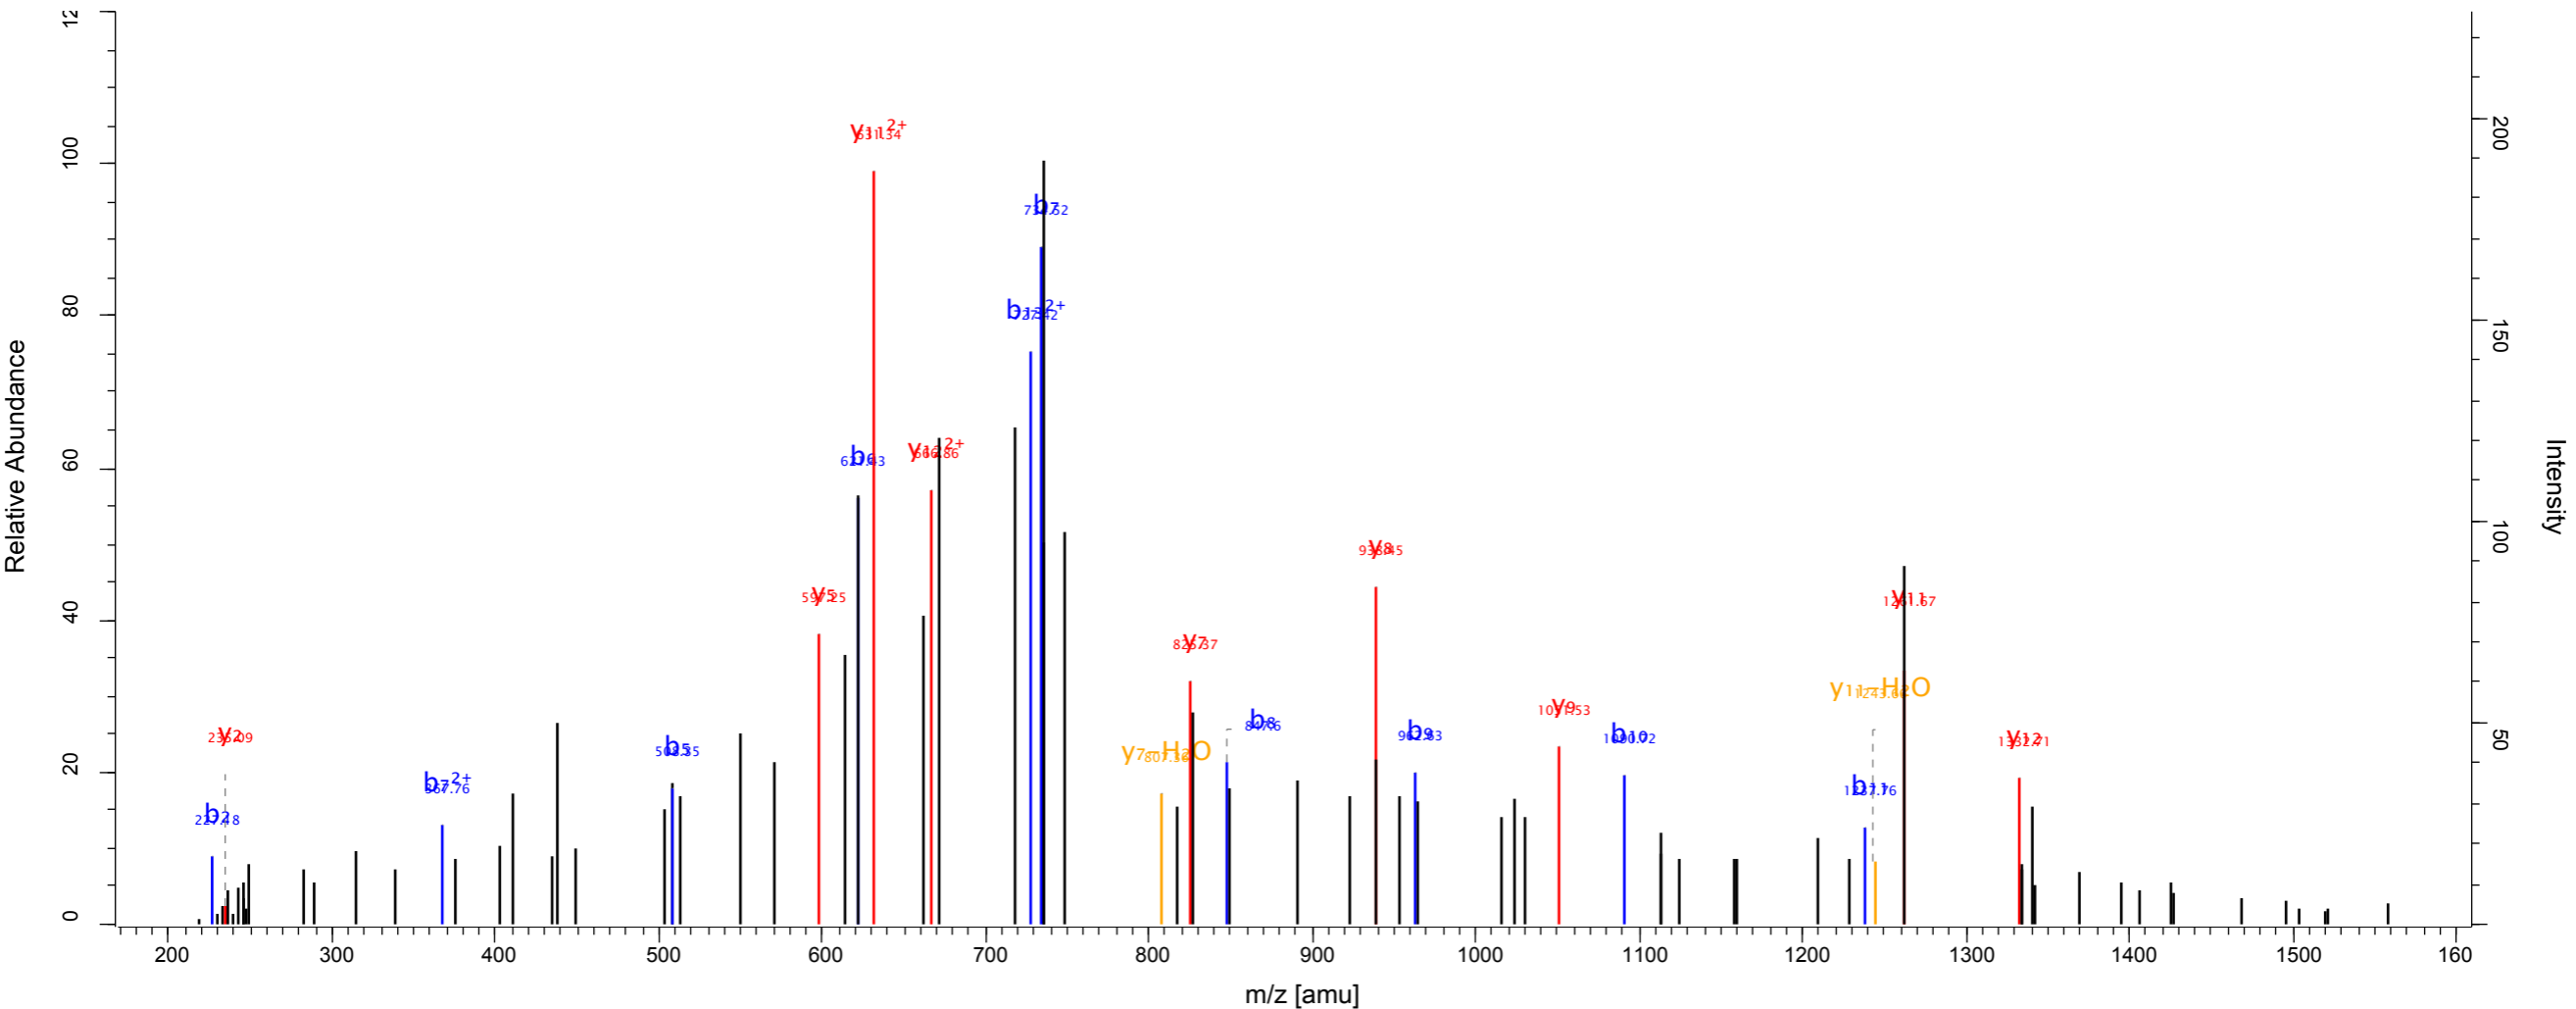

|             |           |          |                                       |
|-------------|-----------|----------|---------------------------------------|
| Scan number | 8107      | Raw file | SKaraca_LMB_H1_Reverse_041011_22_rep1 |
| Method      | ITMS; CID | Pepti... | 101.96                                |

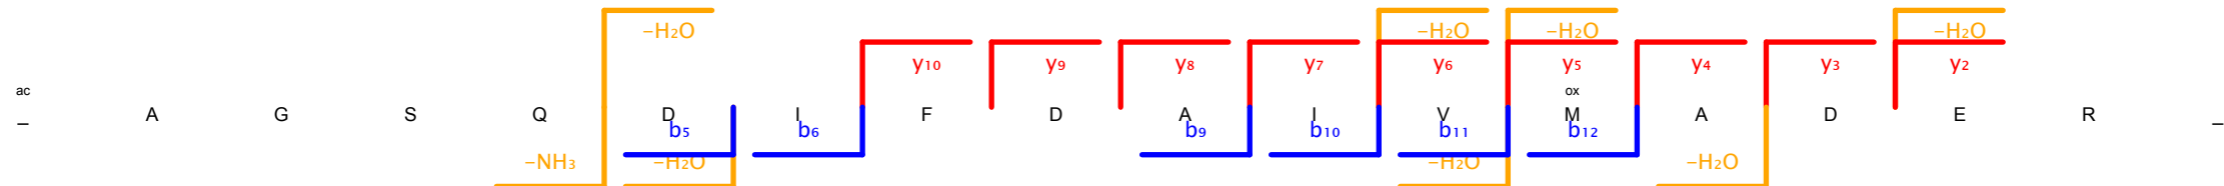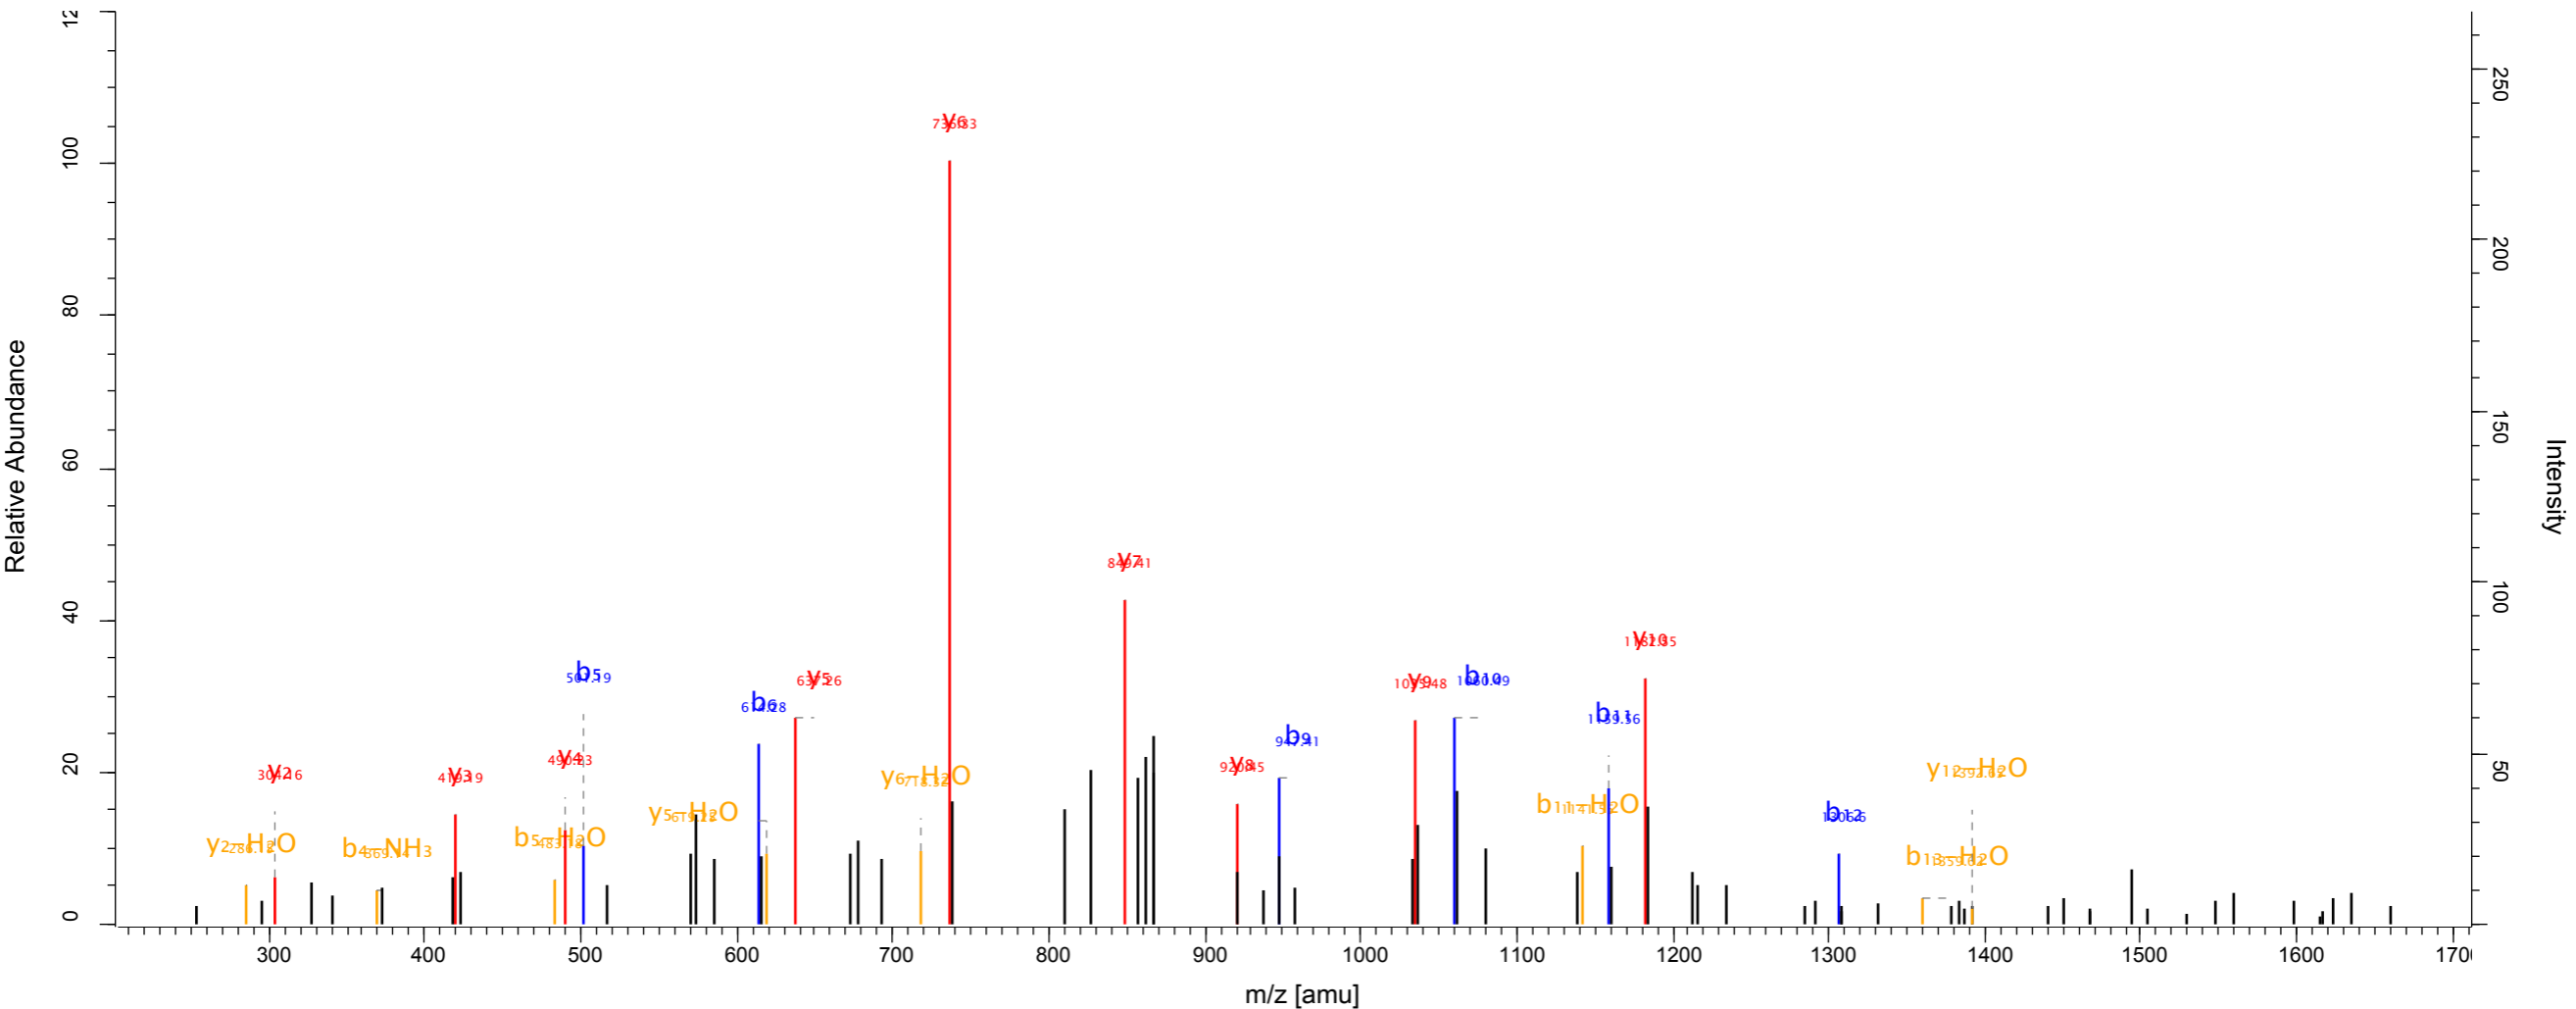



|             |           |          |                                      |
|-------------|-----------|----------|--------------------------------------|
| Scan number | 7512      | Raw file | SKaraca_LMB_H1_Reverse_041011_5_rep1 |
| Method      | ITMS; CID | Pepti... | 193.32                               |

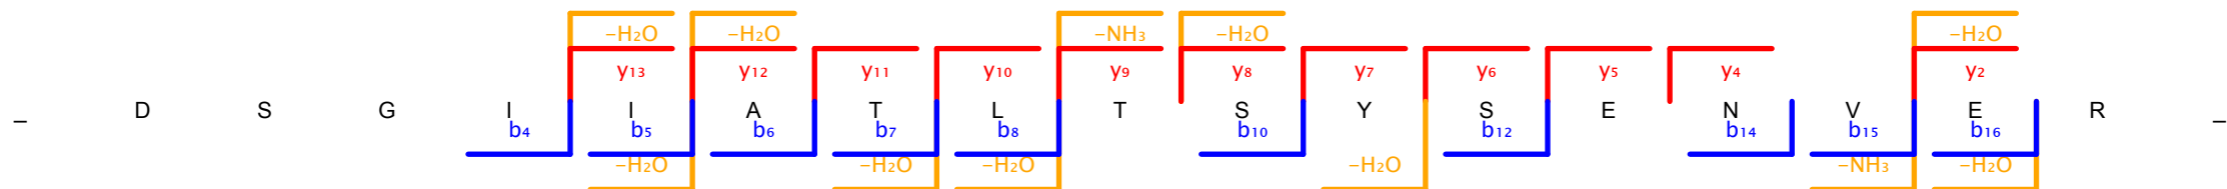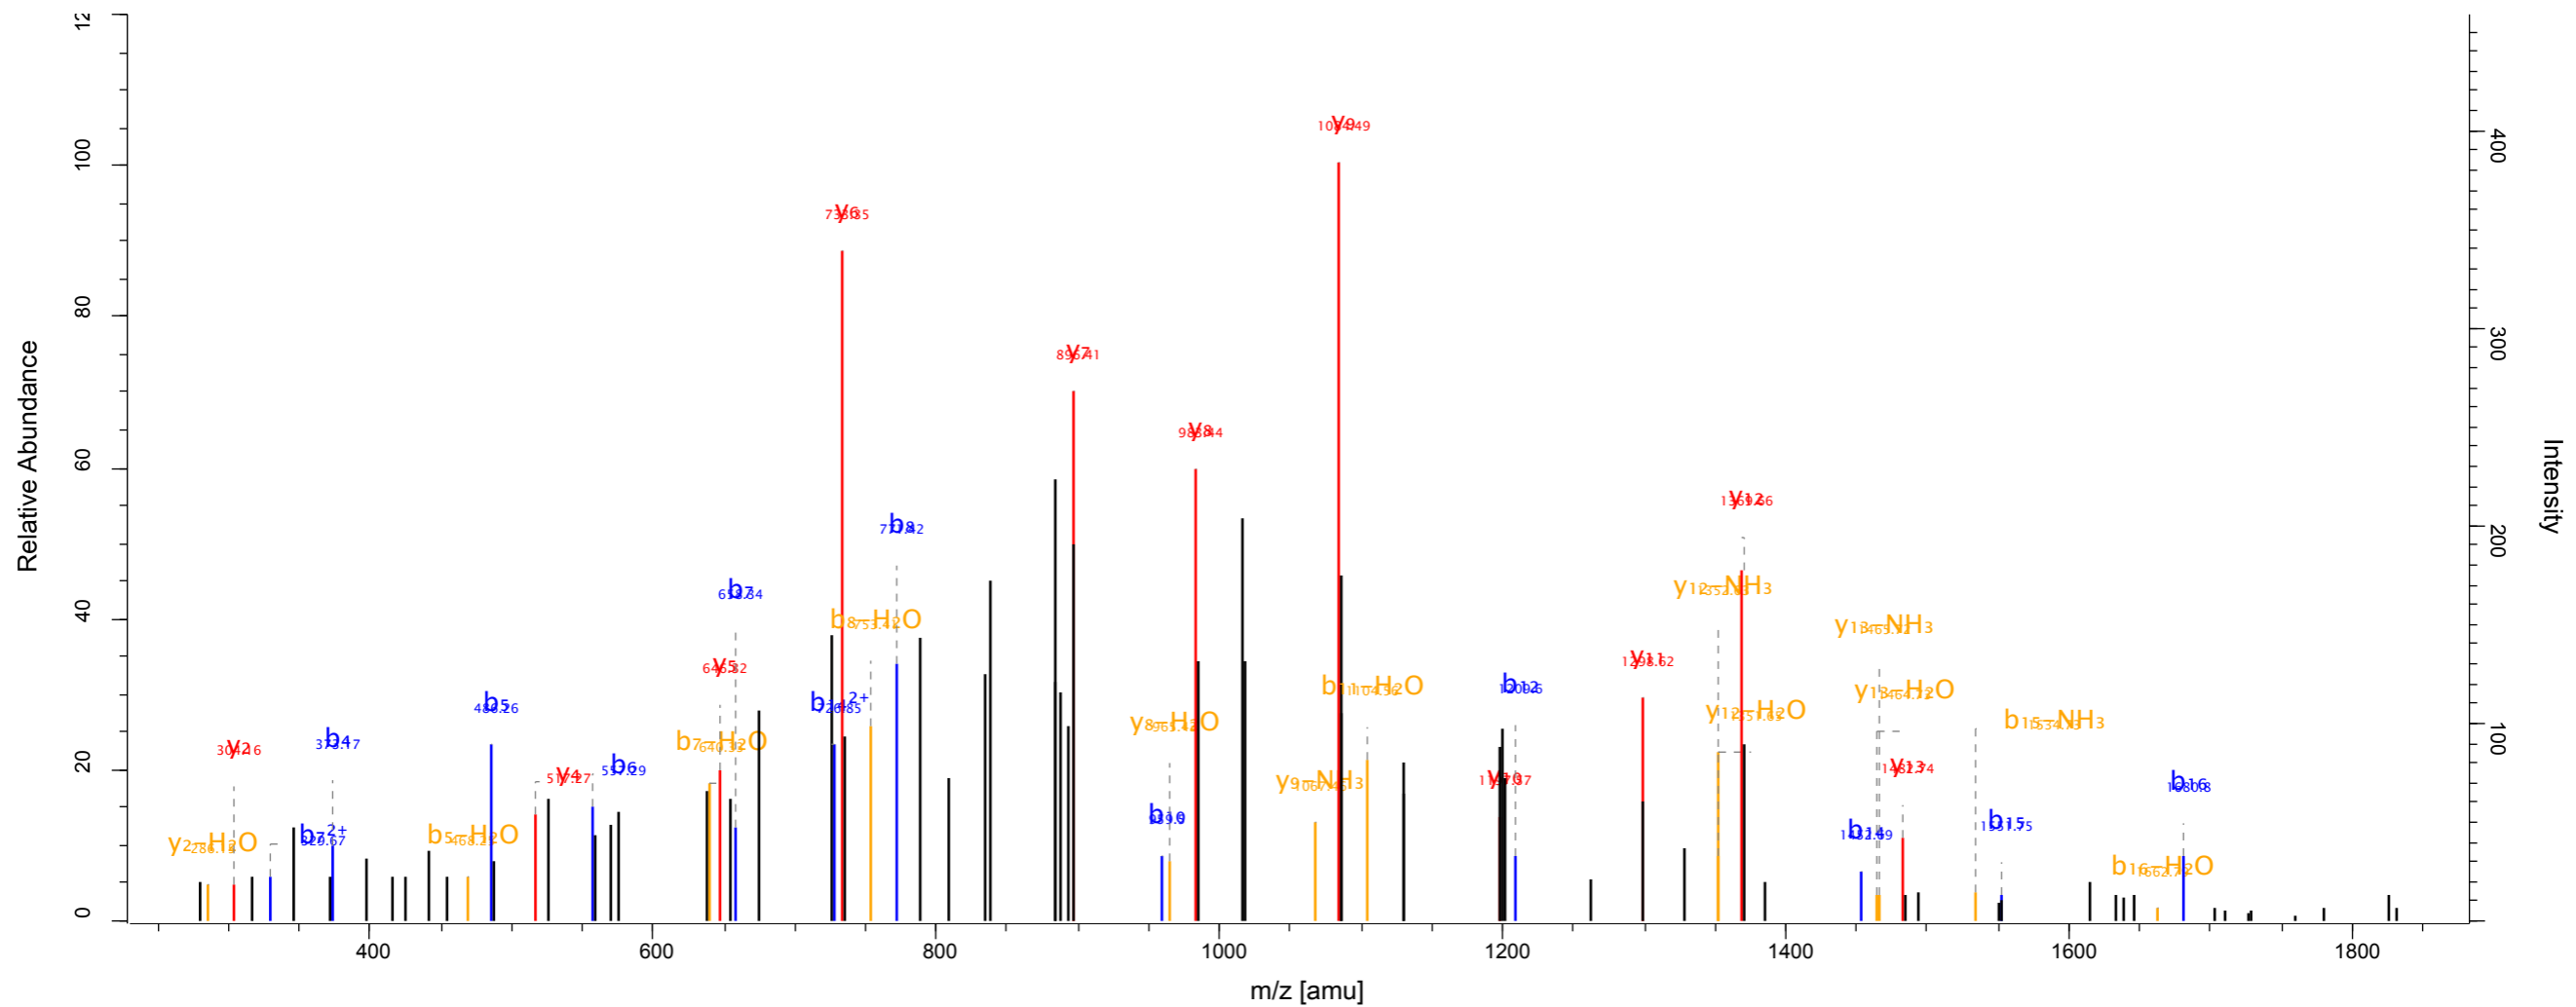

Scan number 4006 Raw file SKaraca\_LMB\_H1\_Reverse\_041011\_5\_rep2  
 Method ITMS; CID Pepti... 108.9

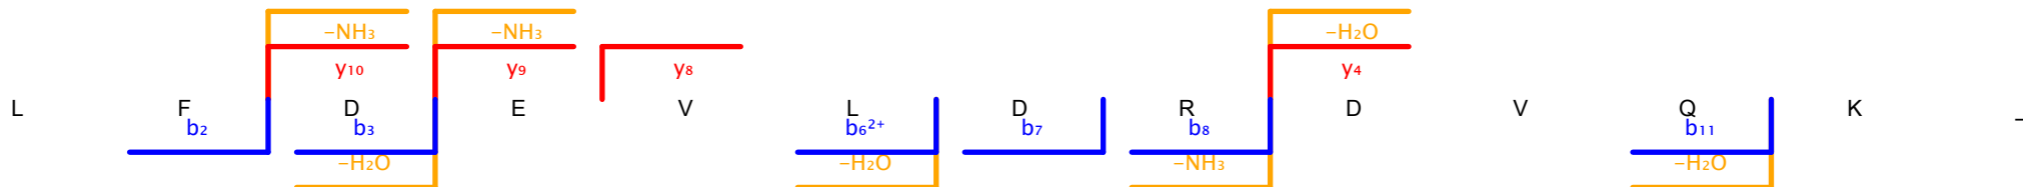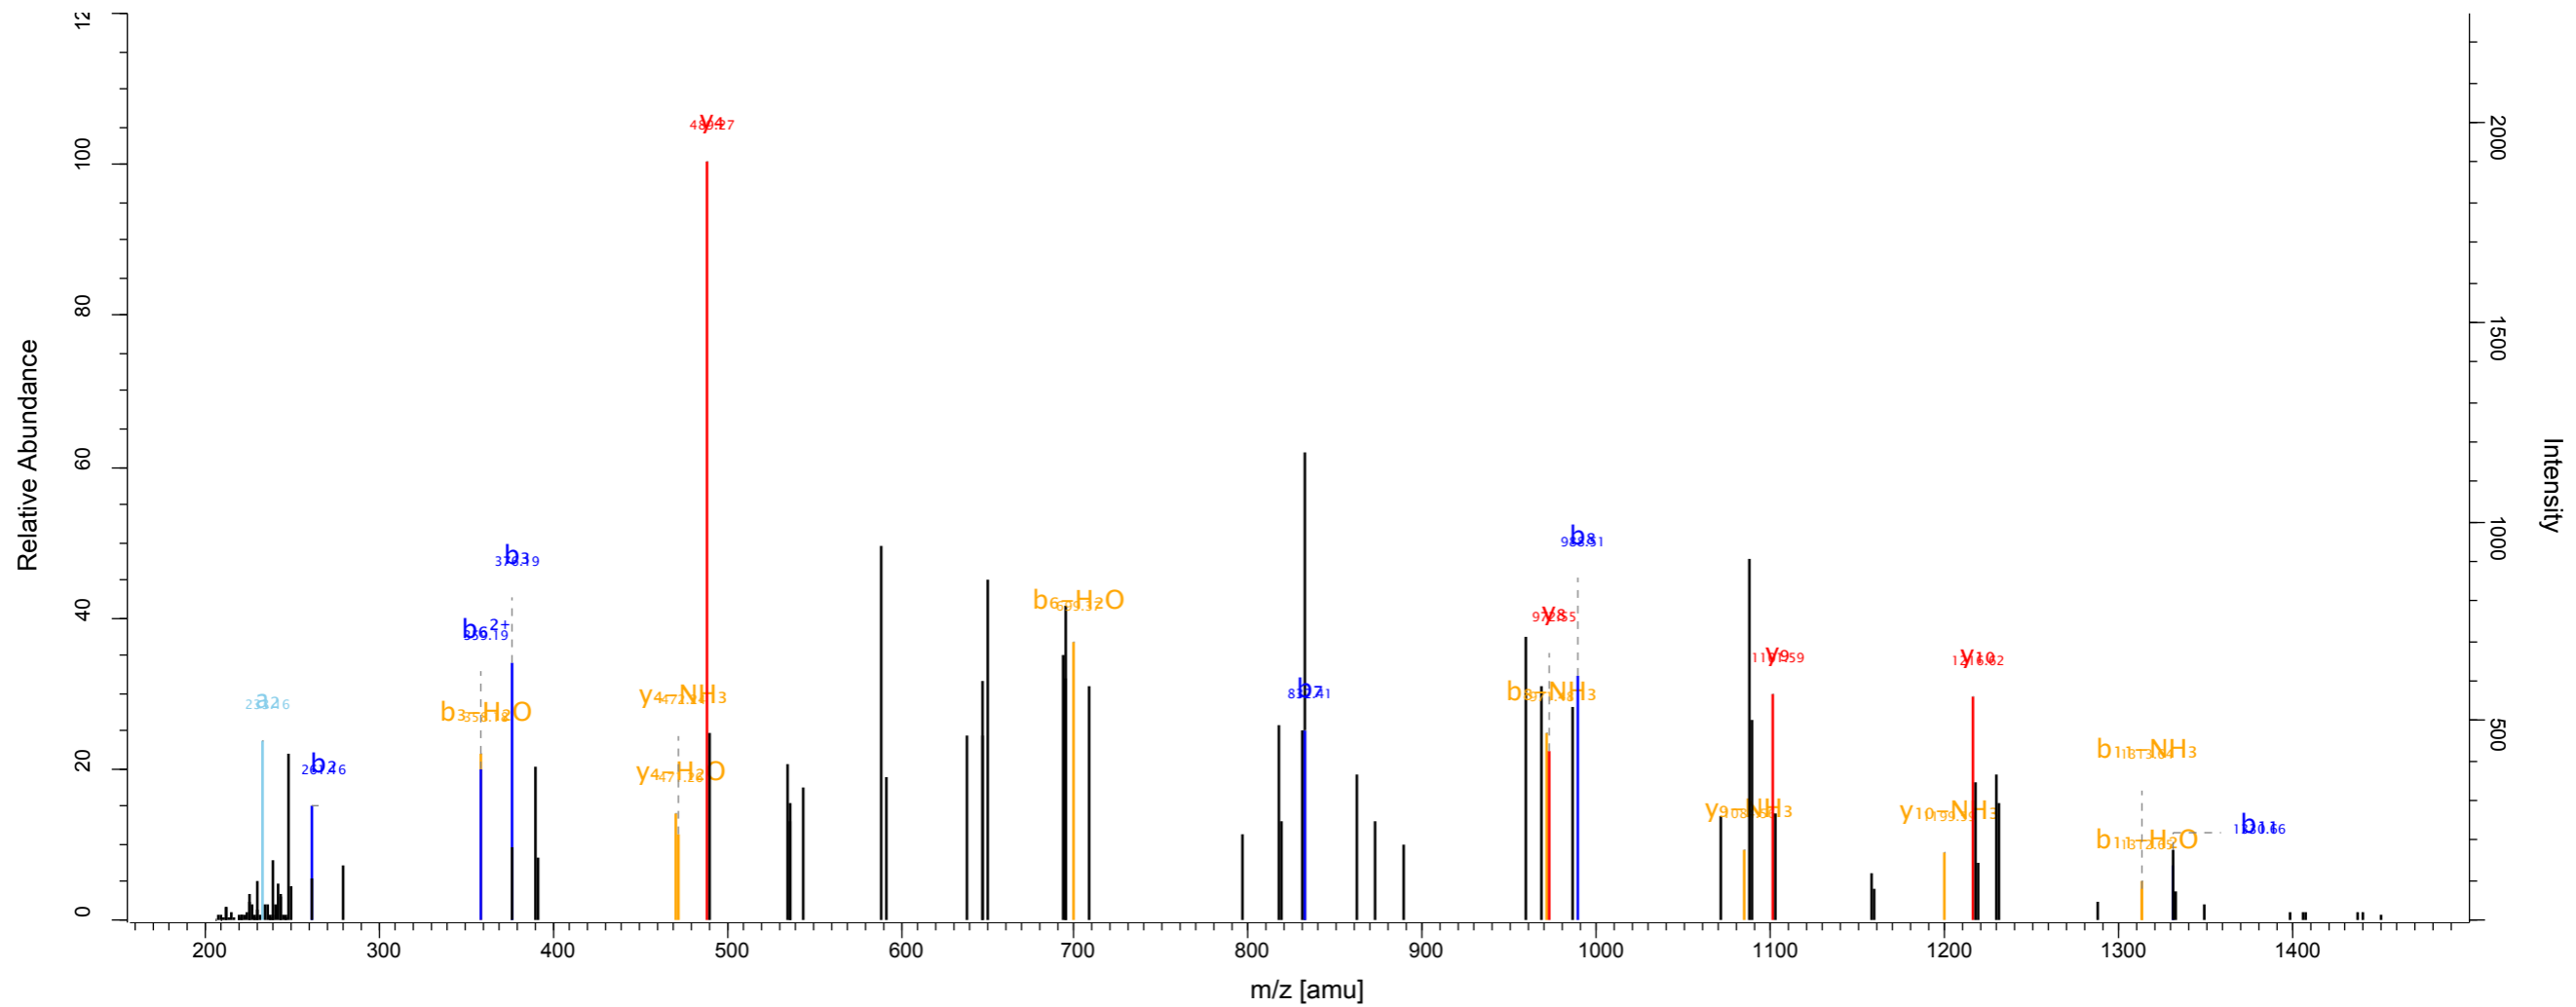

|             |           |          |                                      |
|-------------|-----------|----------|--------------------------------------|
| Scan number | 4056      | Raw file | SKaraca_LMB_H1_Reverse_041011_6_rep2 |
| Method      | ITMS; CID | Pepti... | 92.3                                 |

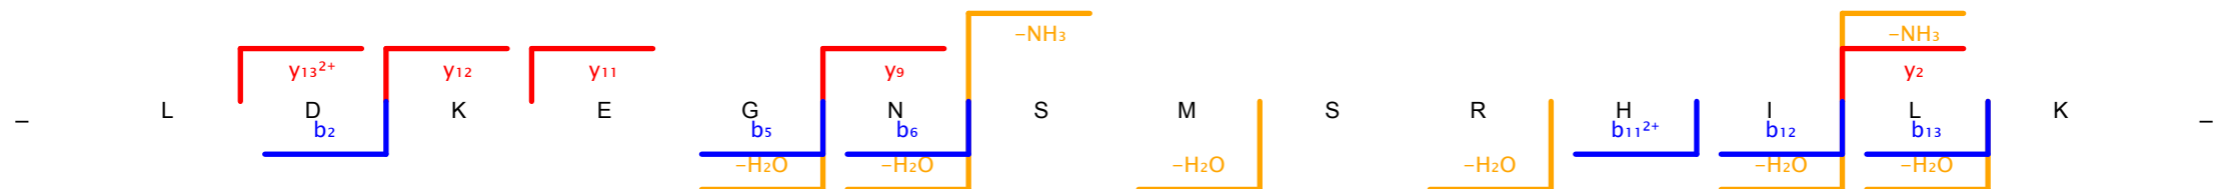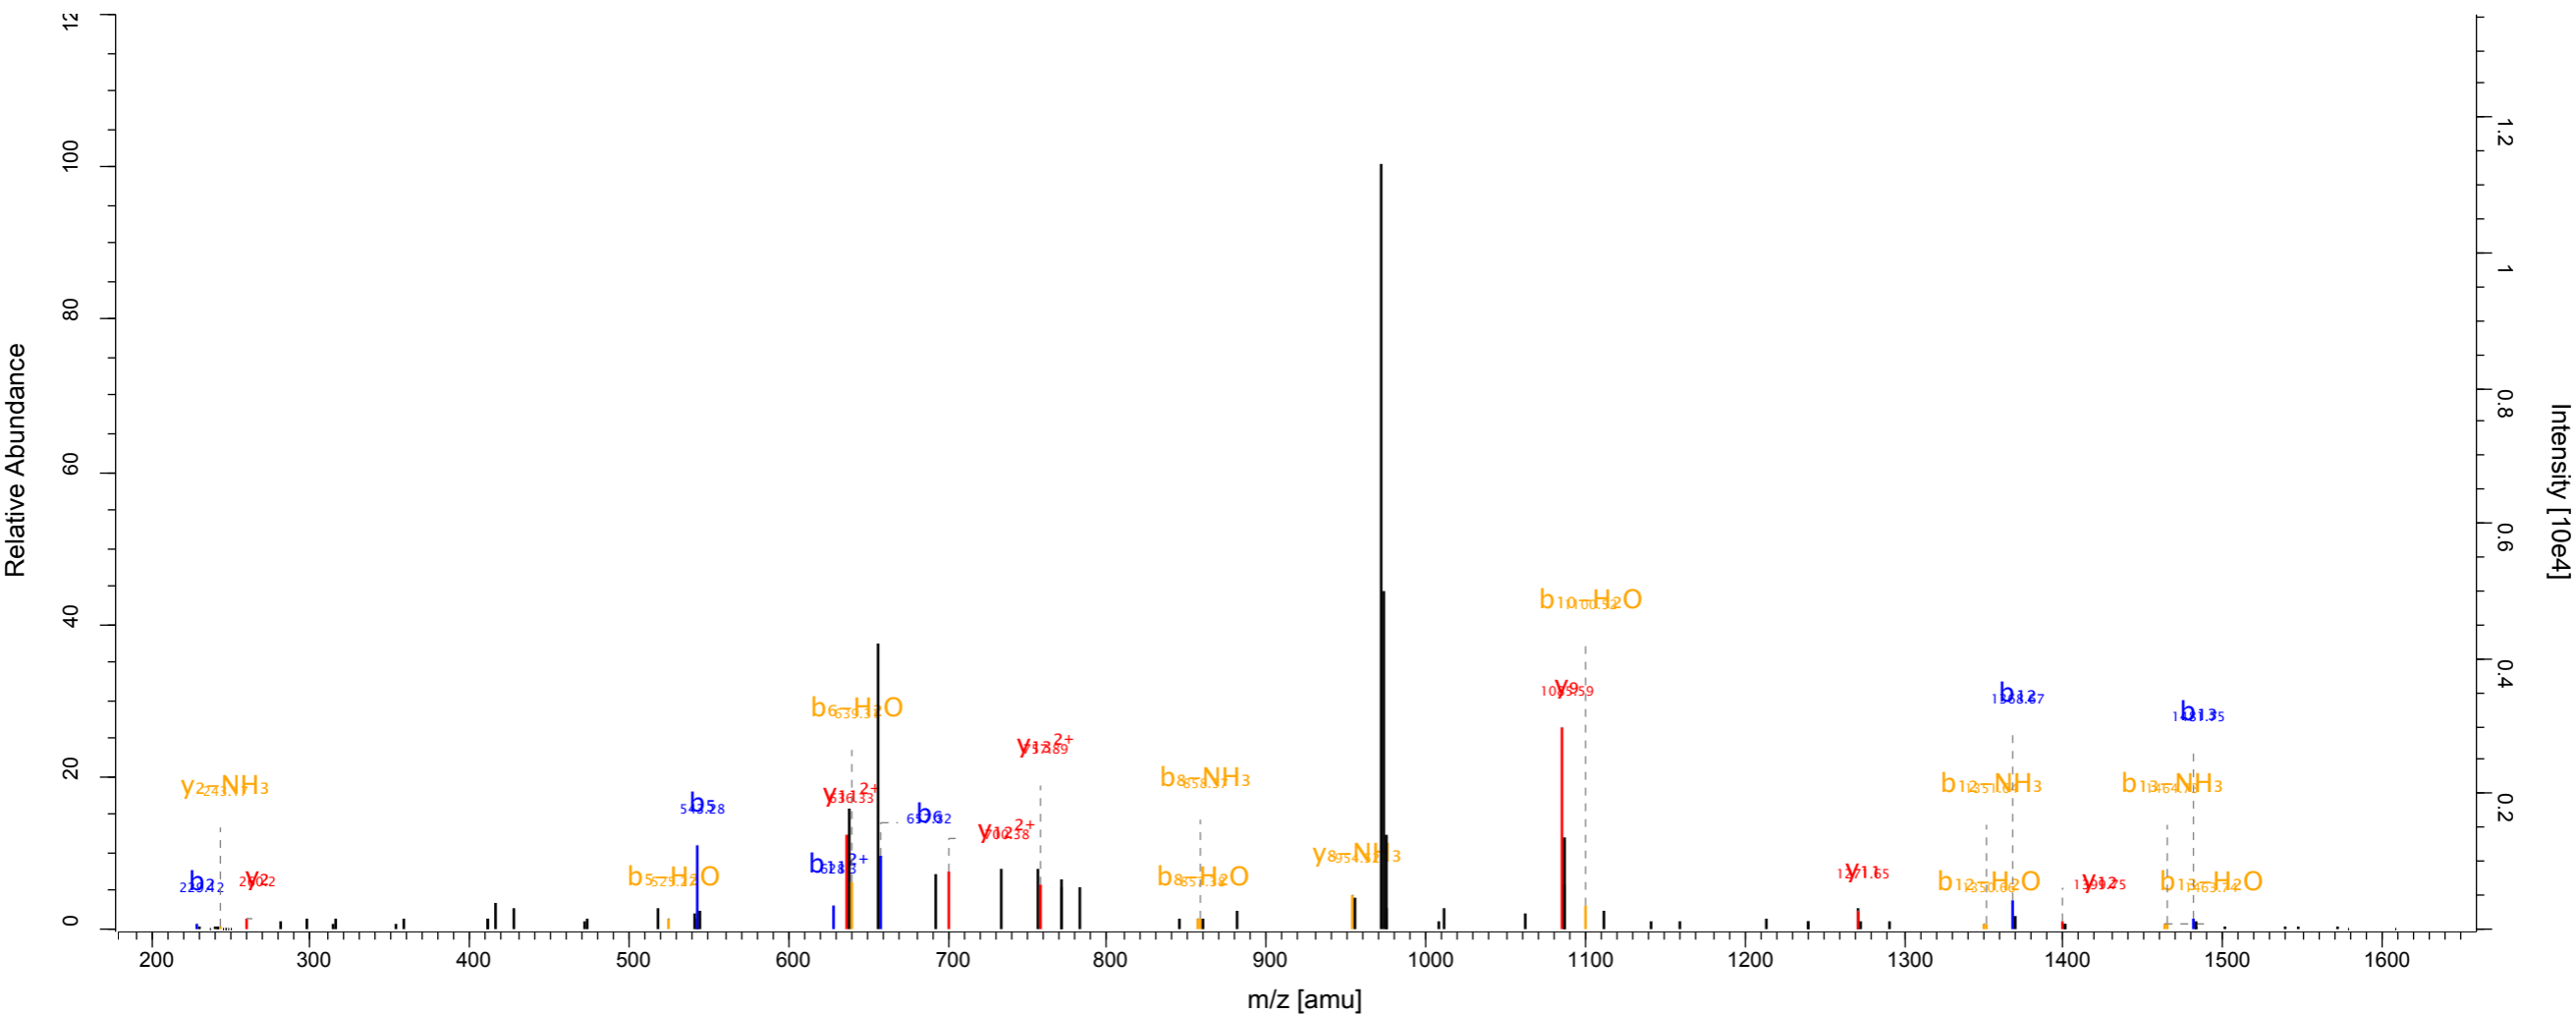

Scan number 8081 Raw file SKaraca\_LMB\_H1\_Reverse\_041011\_6\_rep2  
 Method ITMS; CID Pepti... 160.65

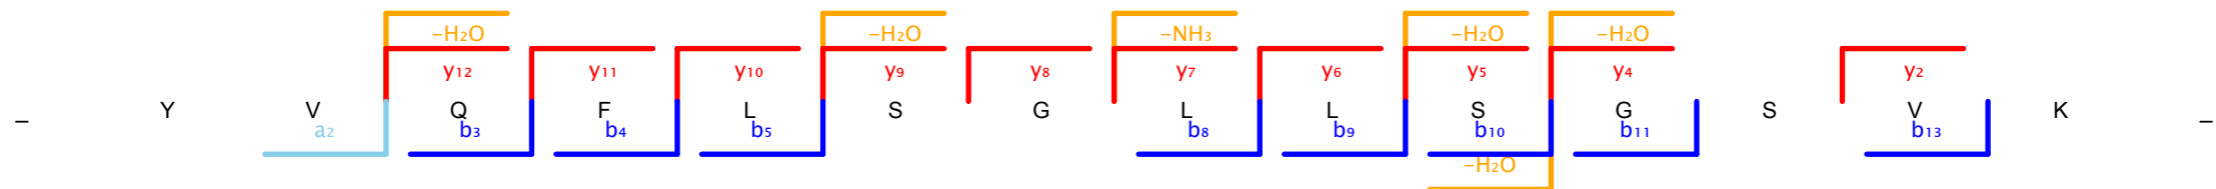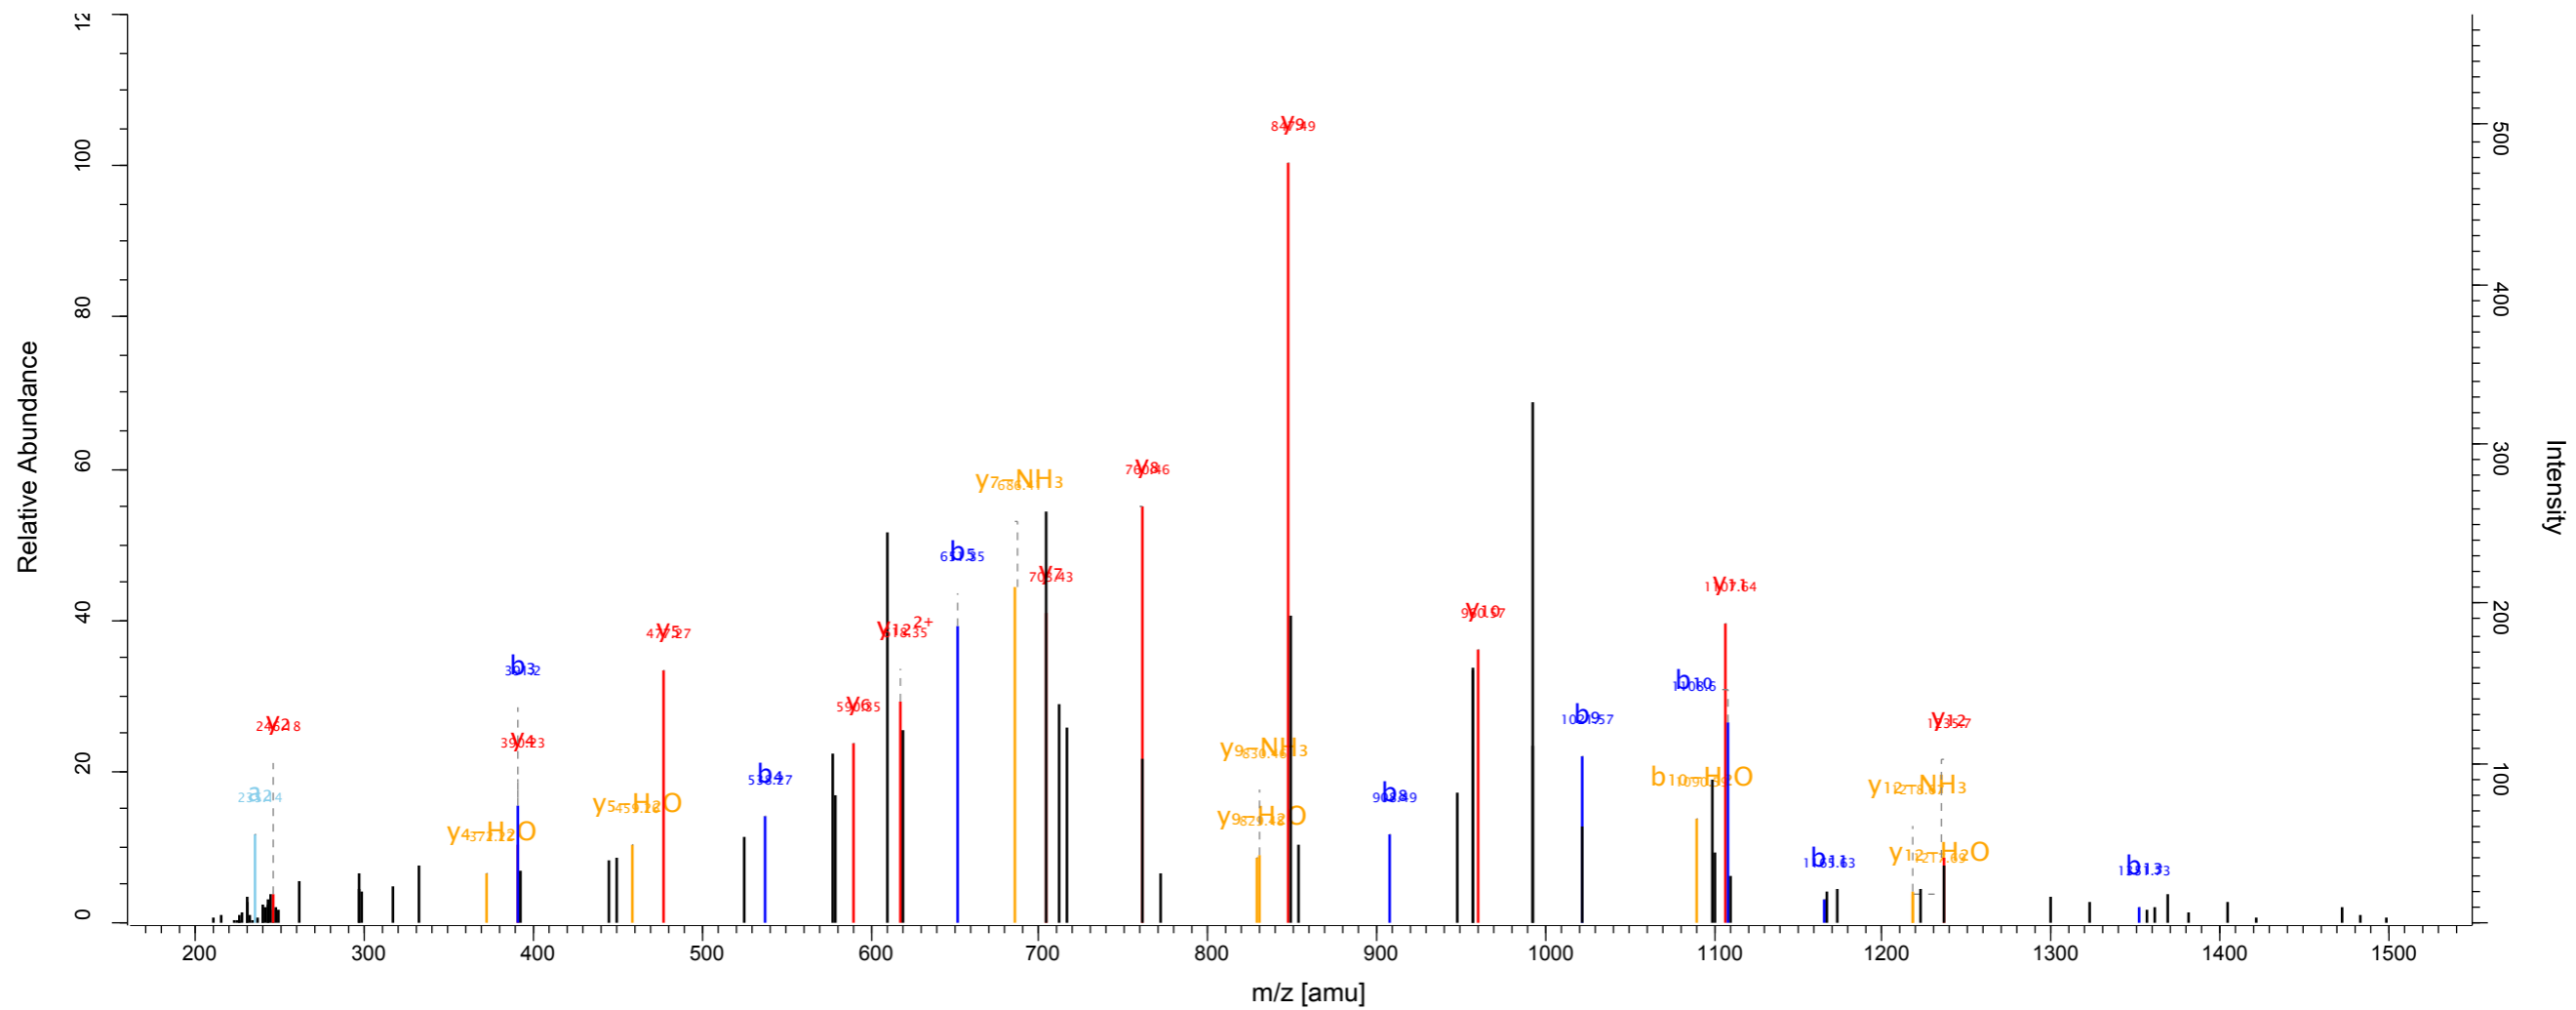

Scan number 8257 Raw file SKaraca\_LMB\_H1\_Reverse\_041011\_6\_rep2  
 Method ITMS; CID Pepti... 110.12

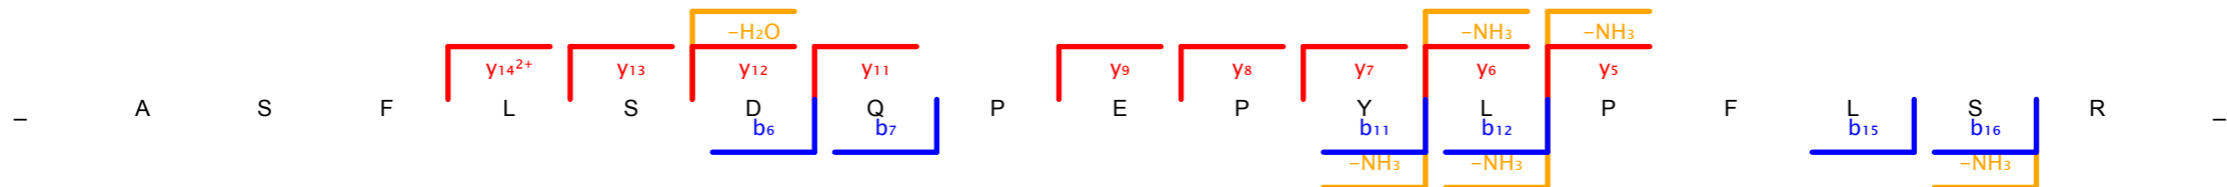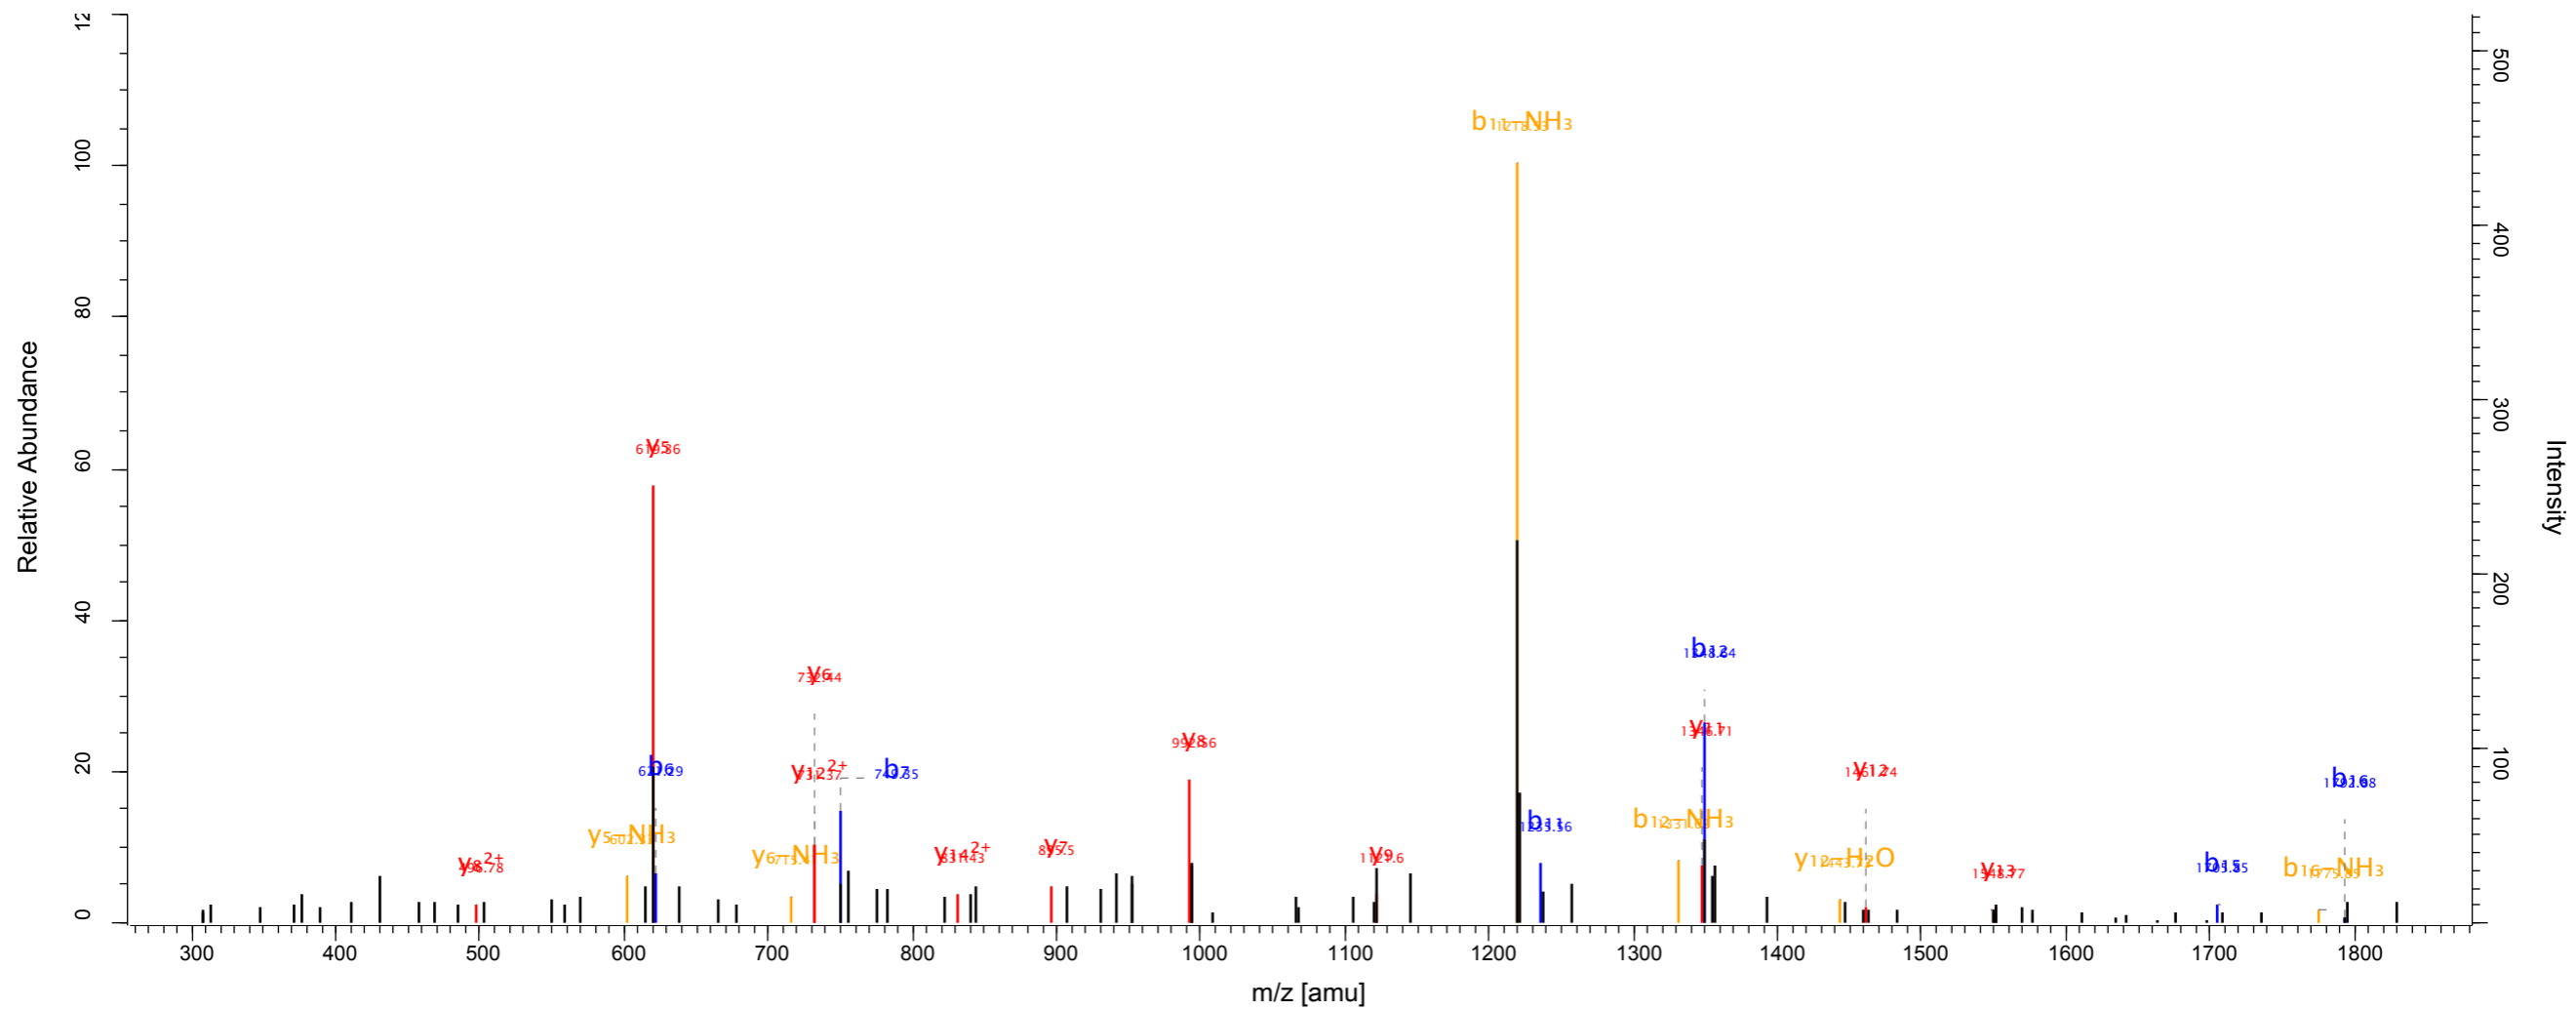

Scan number 2159 Raw file SKaraca\_LMB\_H1\_Reverse\_041011\_8\_rep2  
 Method ITMS; CID Pepti... 89.86

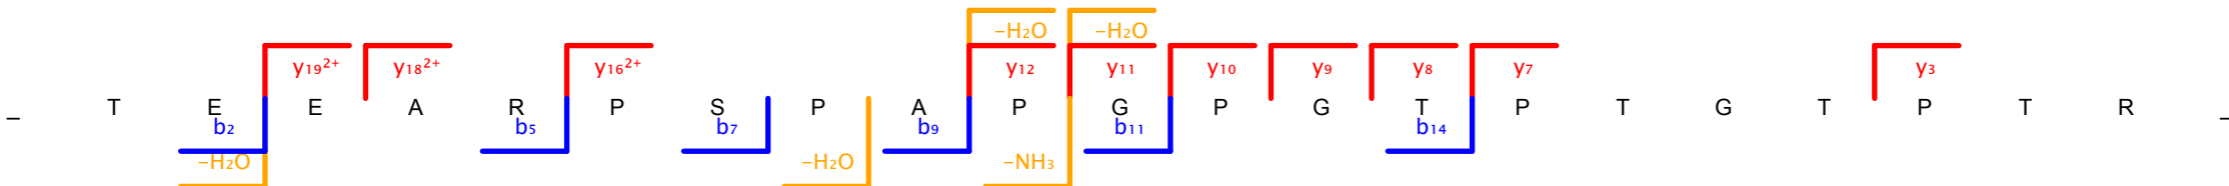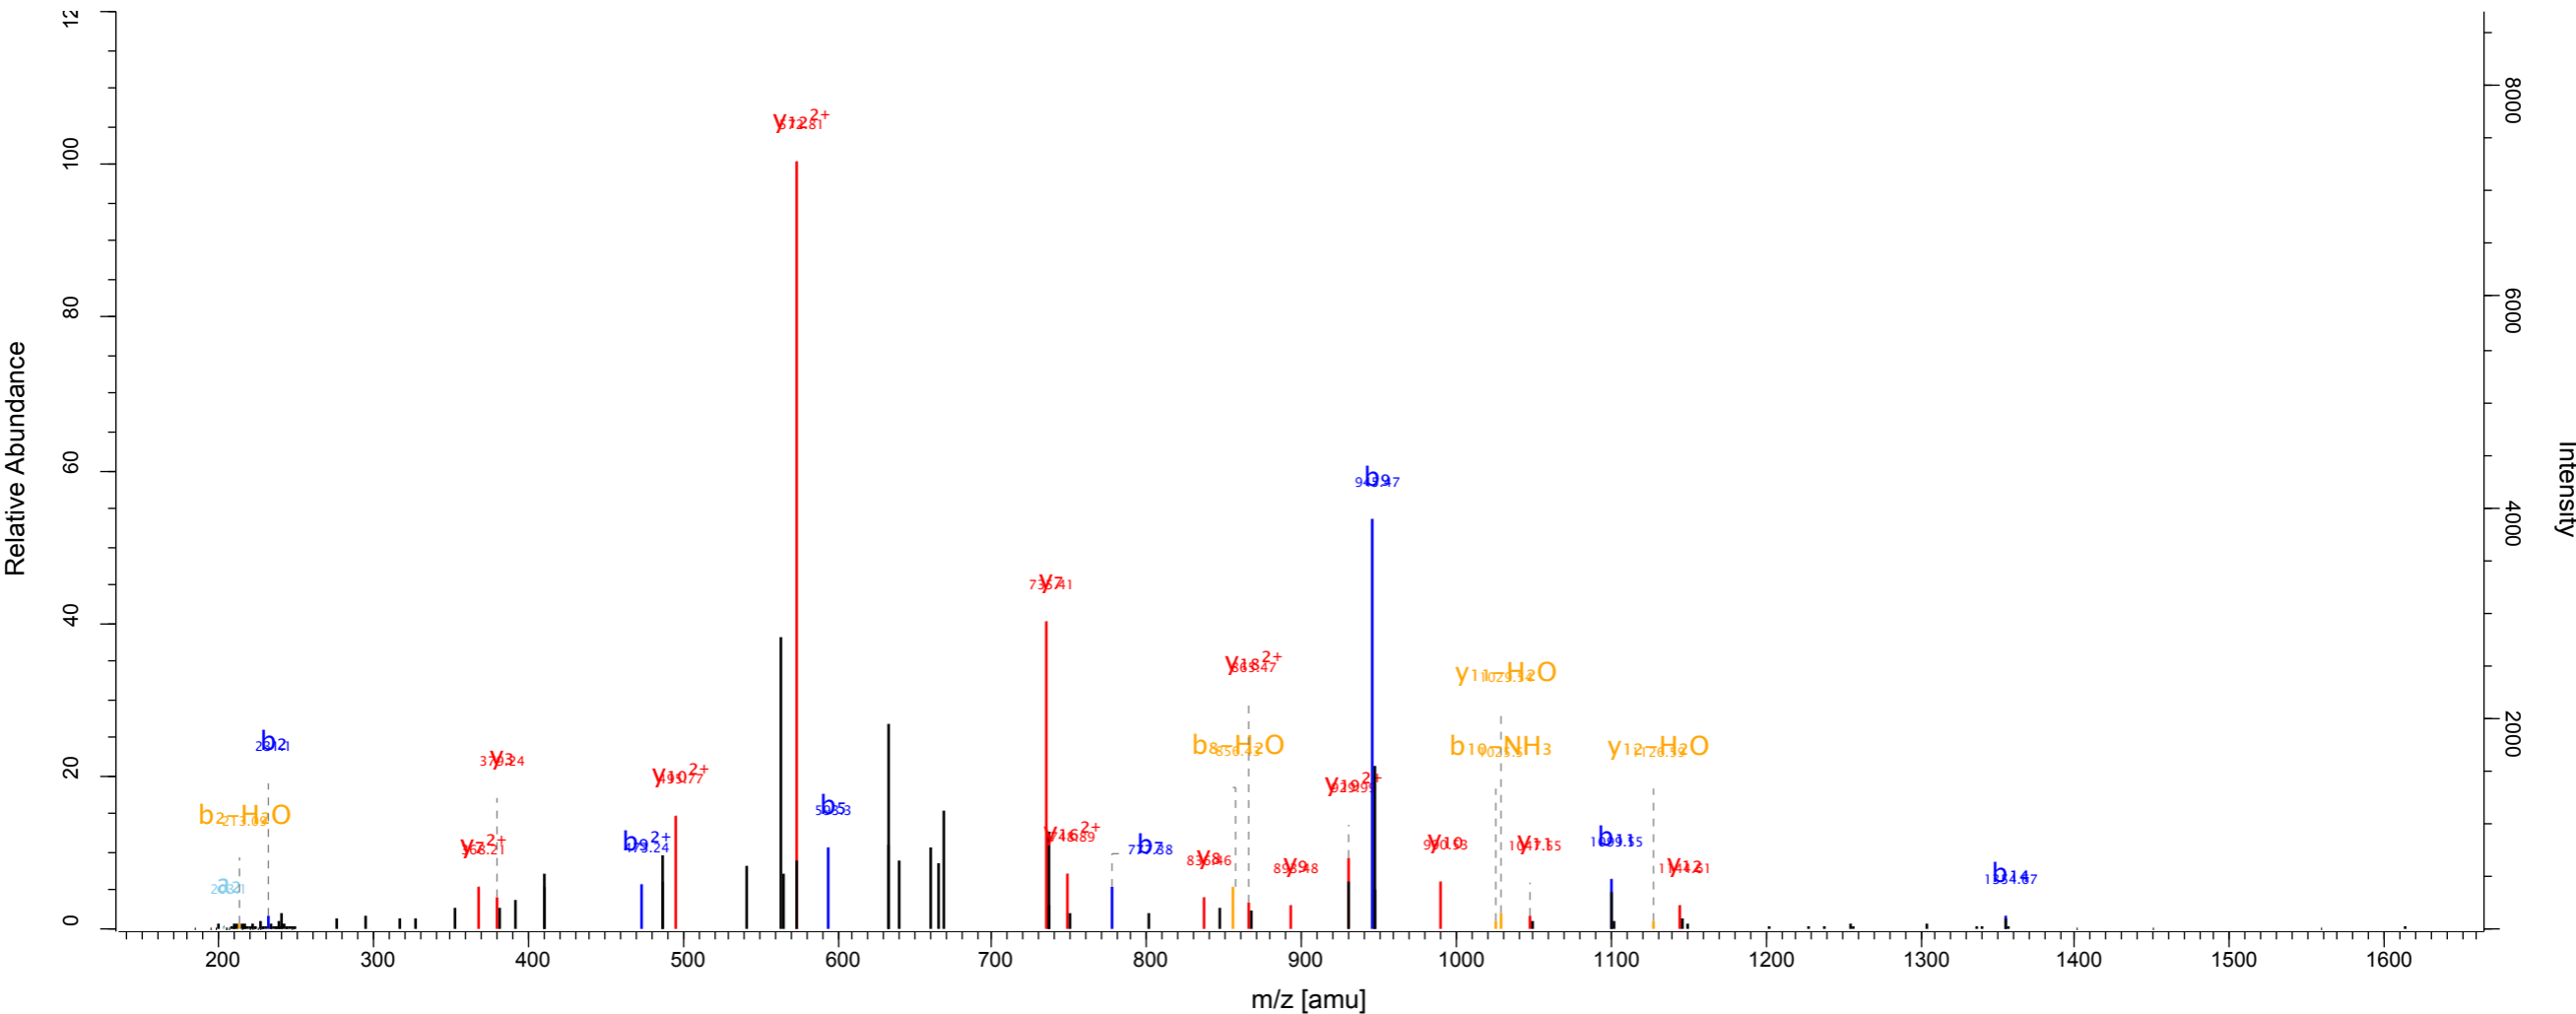

Scan number 6482 Raw file SKaraca\_LMB\_H1\_reverse\_180811\_10\_rep1  
 Method ITMS; CID Pepti... 149.23

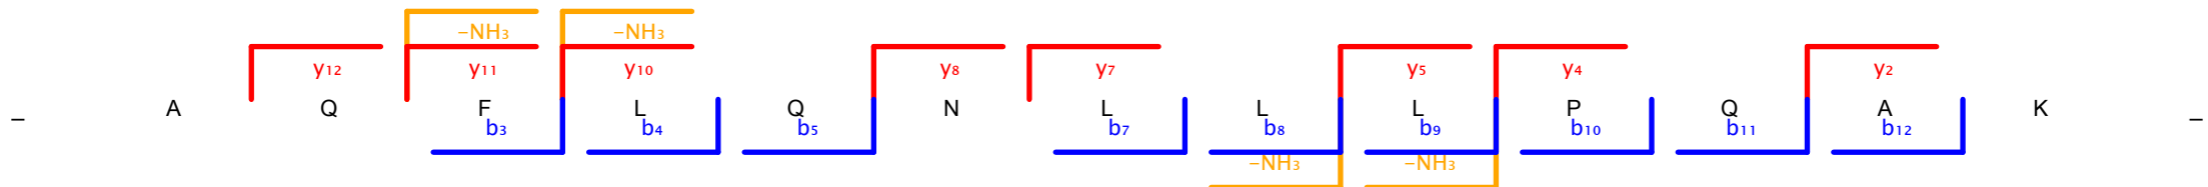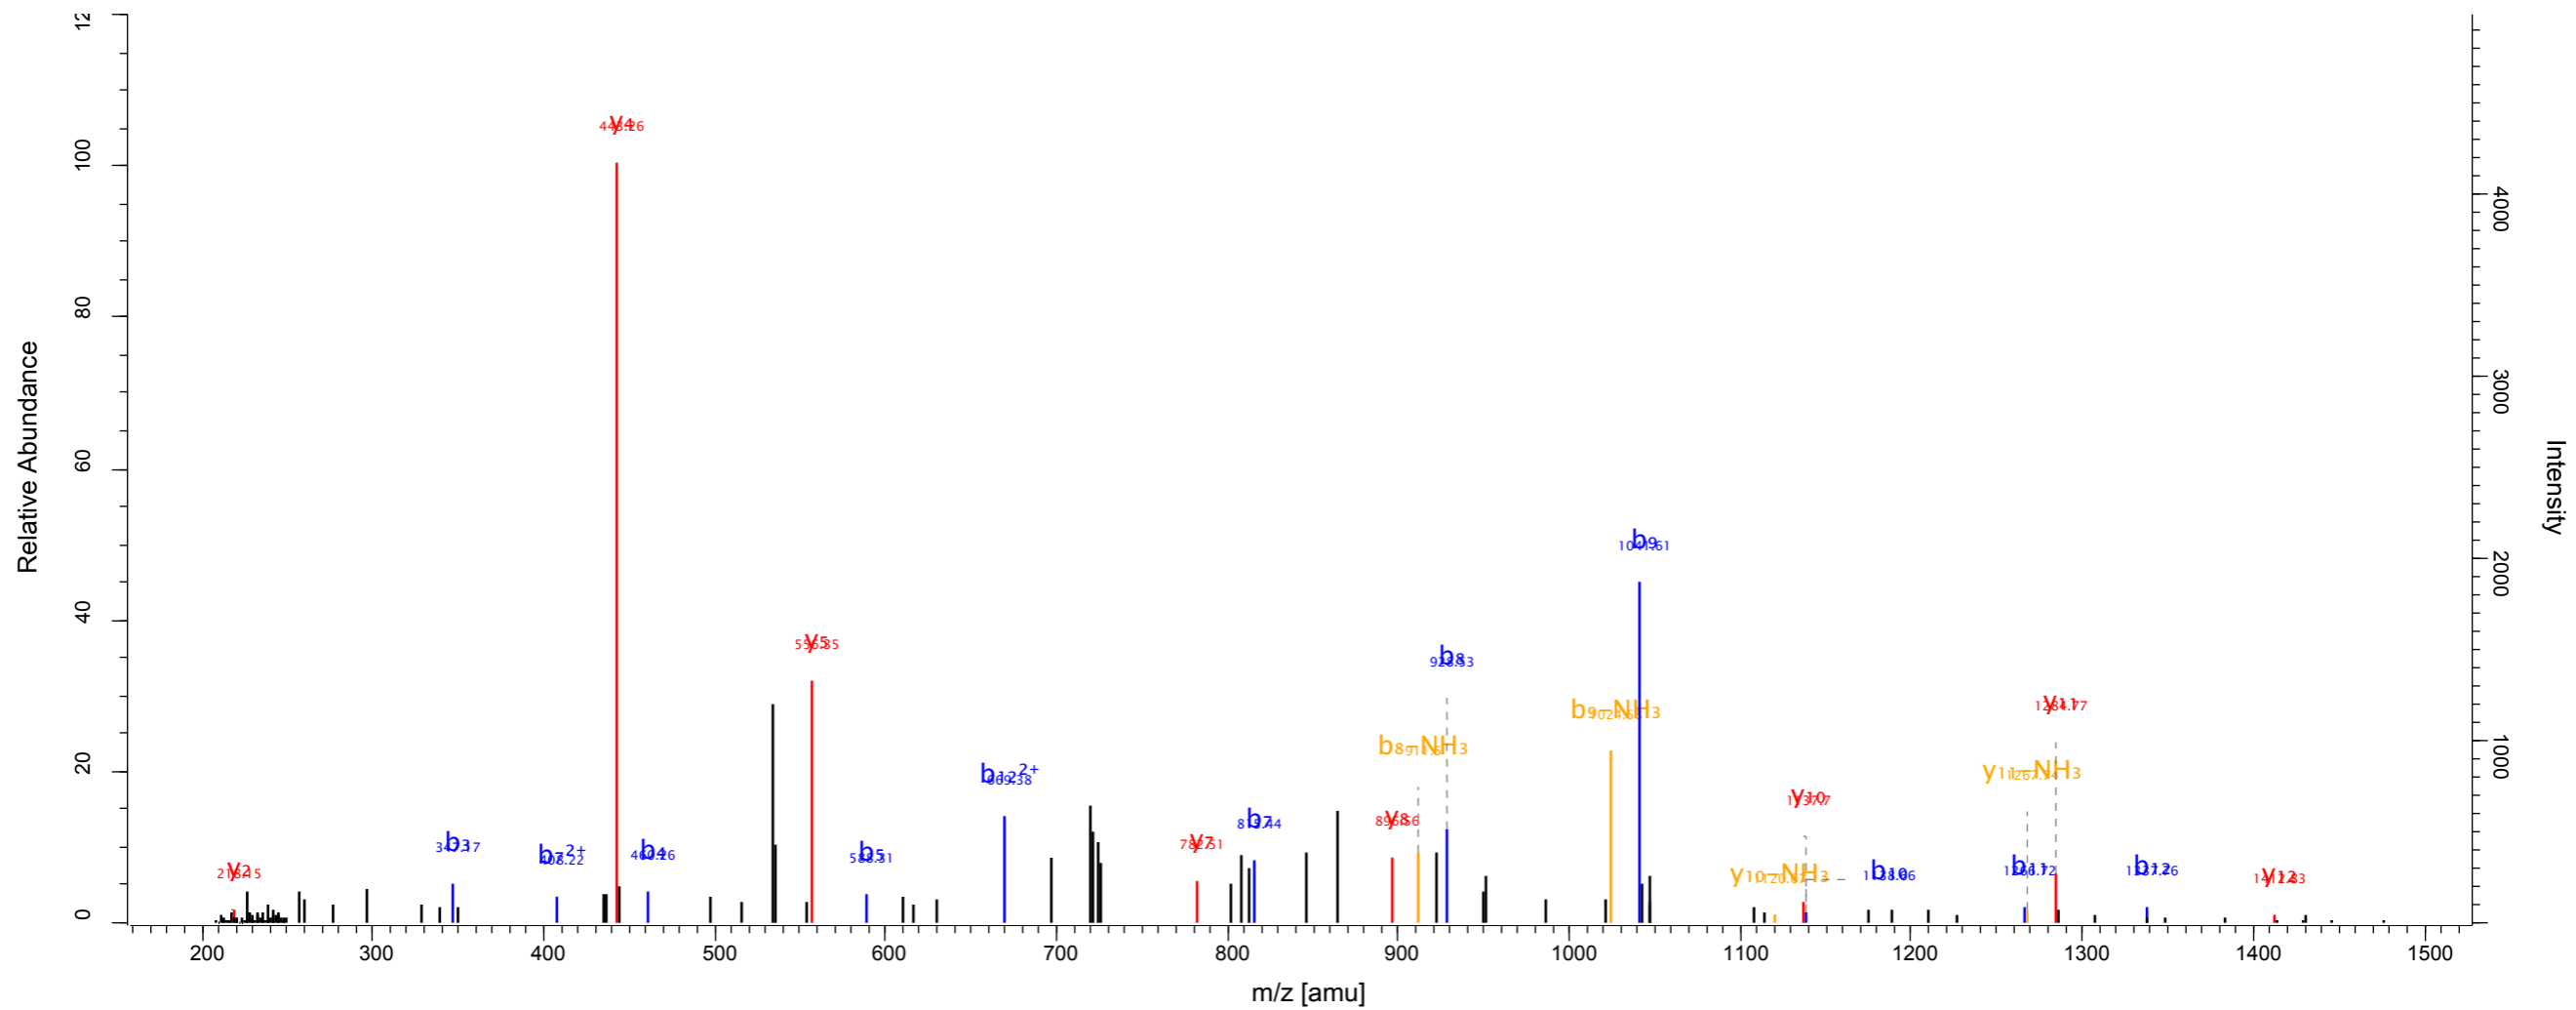

Scan number 7307 Raw file SKaraca\_LMB\_H1\_reverse\_180811\_11\_rep2  
 Method ITMS; CID Pepti... 247.32

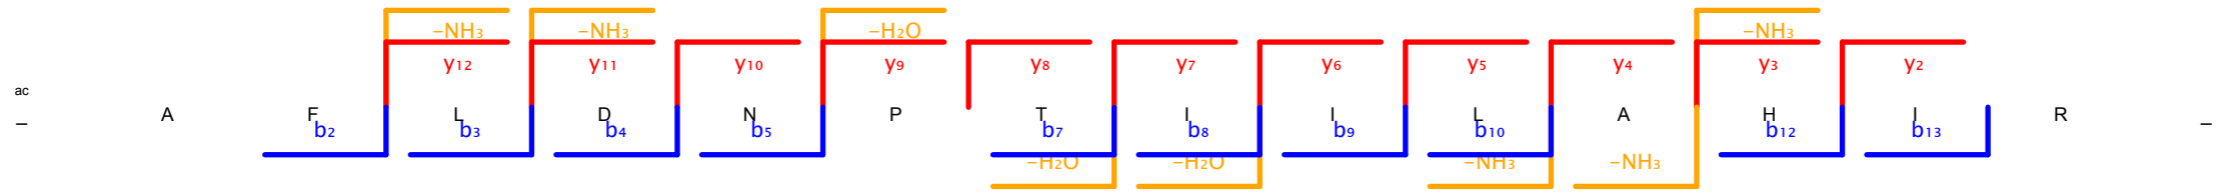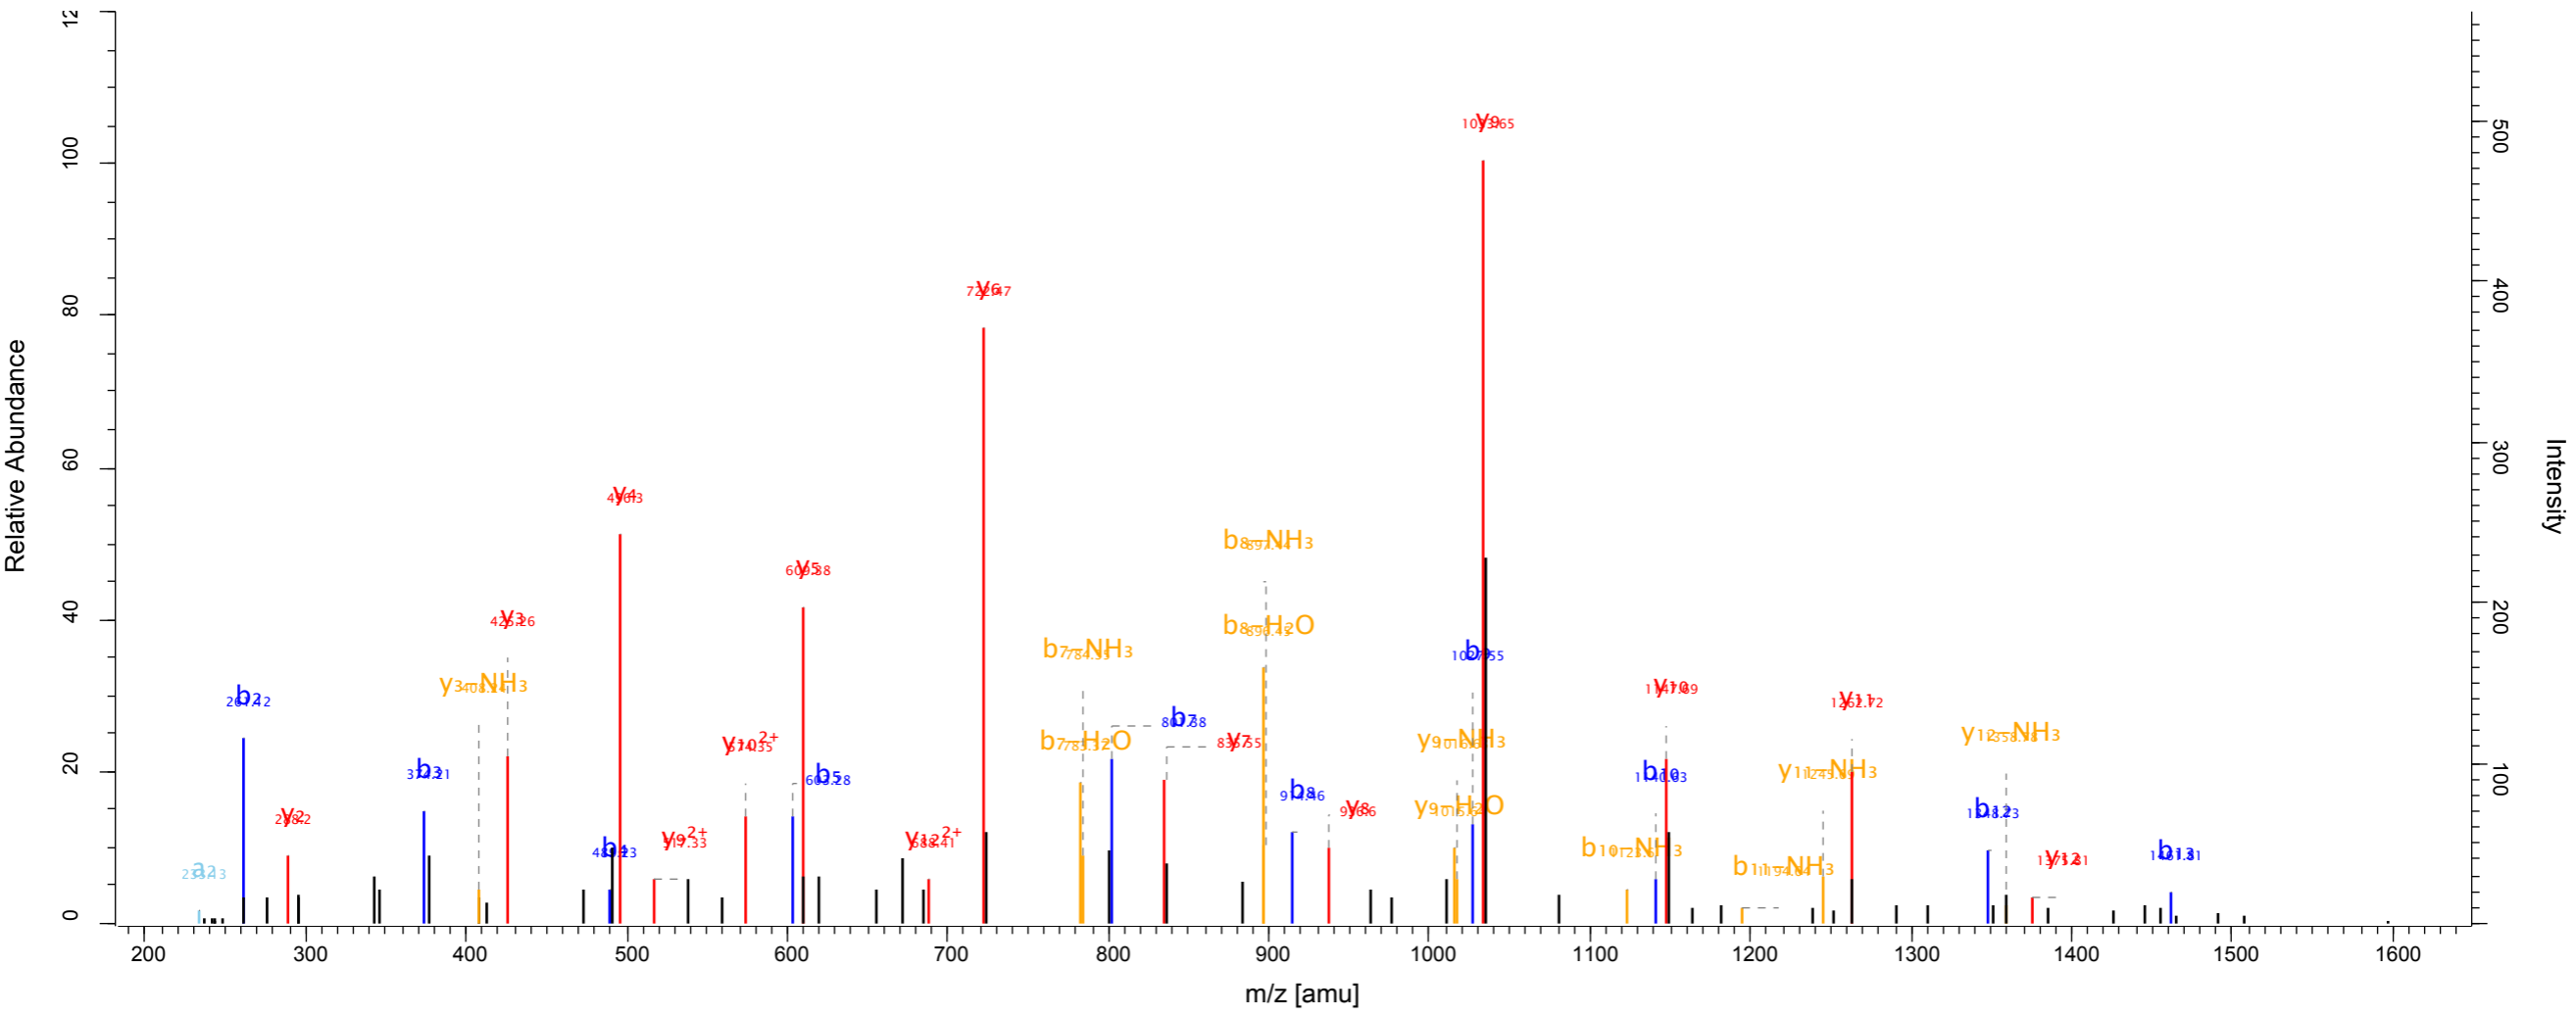



Scan number 7580 Raw file SKaraca\_LMB\_H1\_reverse\_180811\_12\_rep2  
 Method ITMS; CID Pepti... 256.63

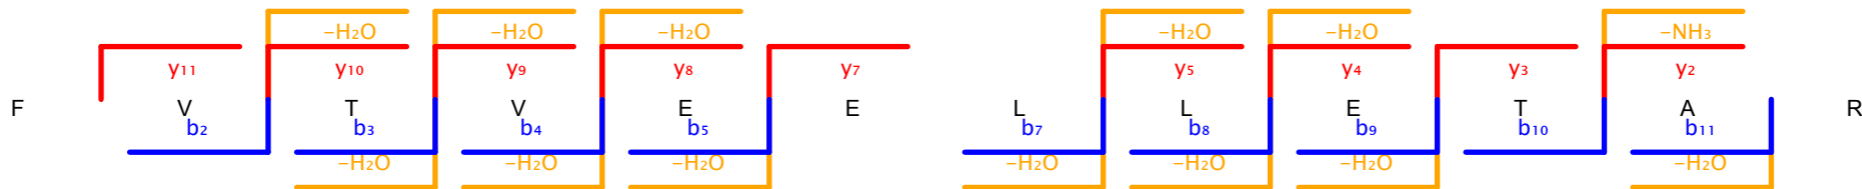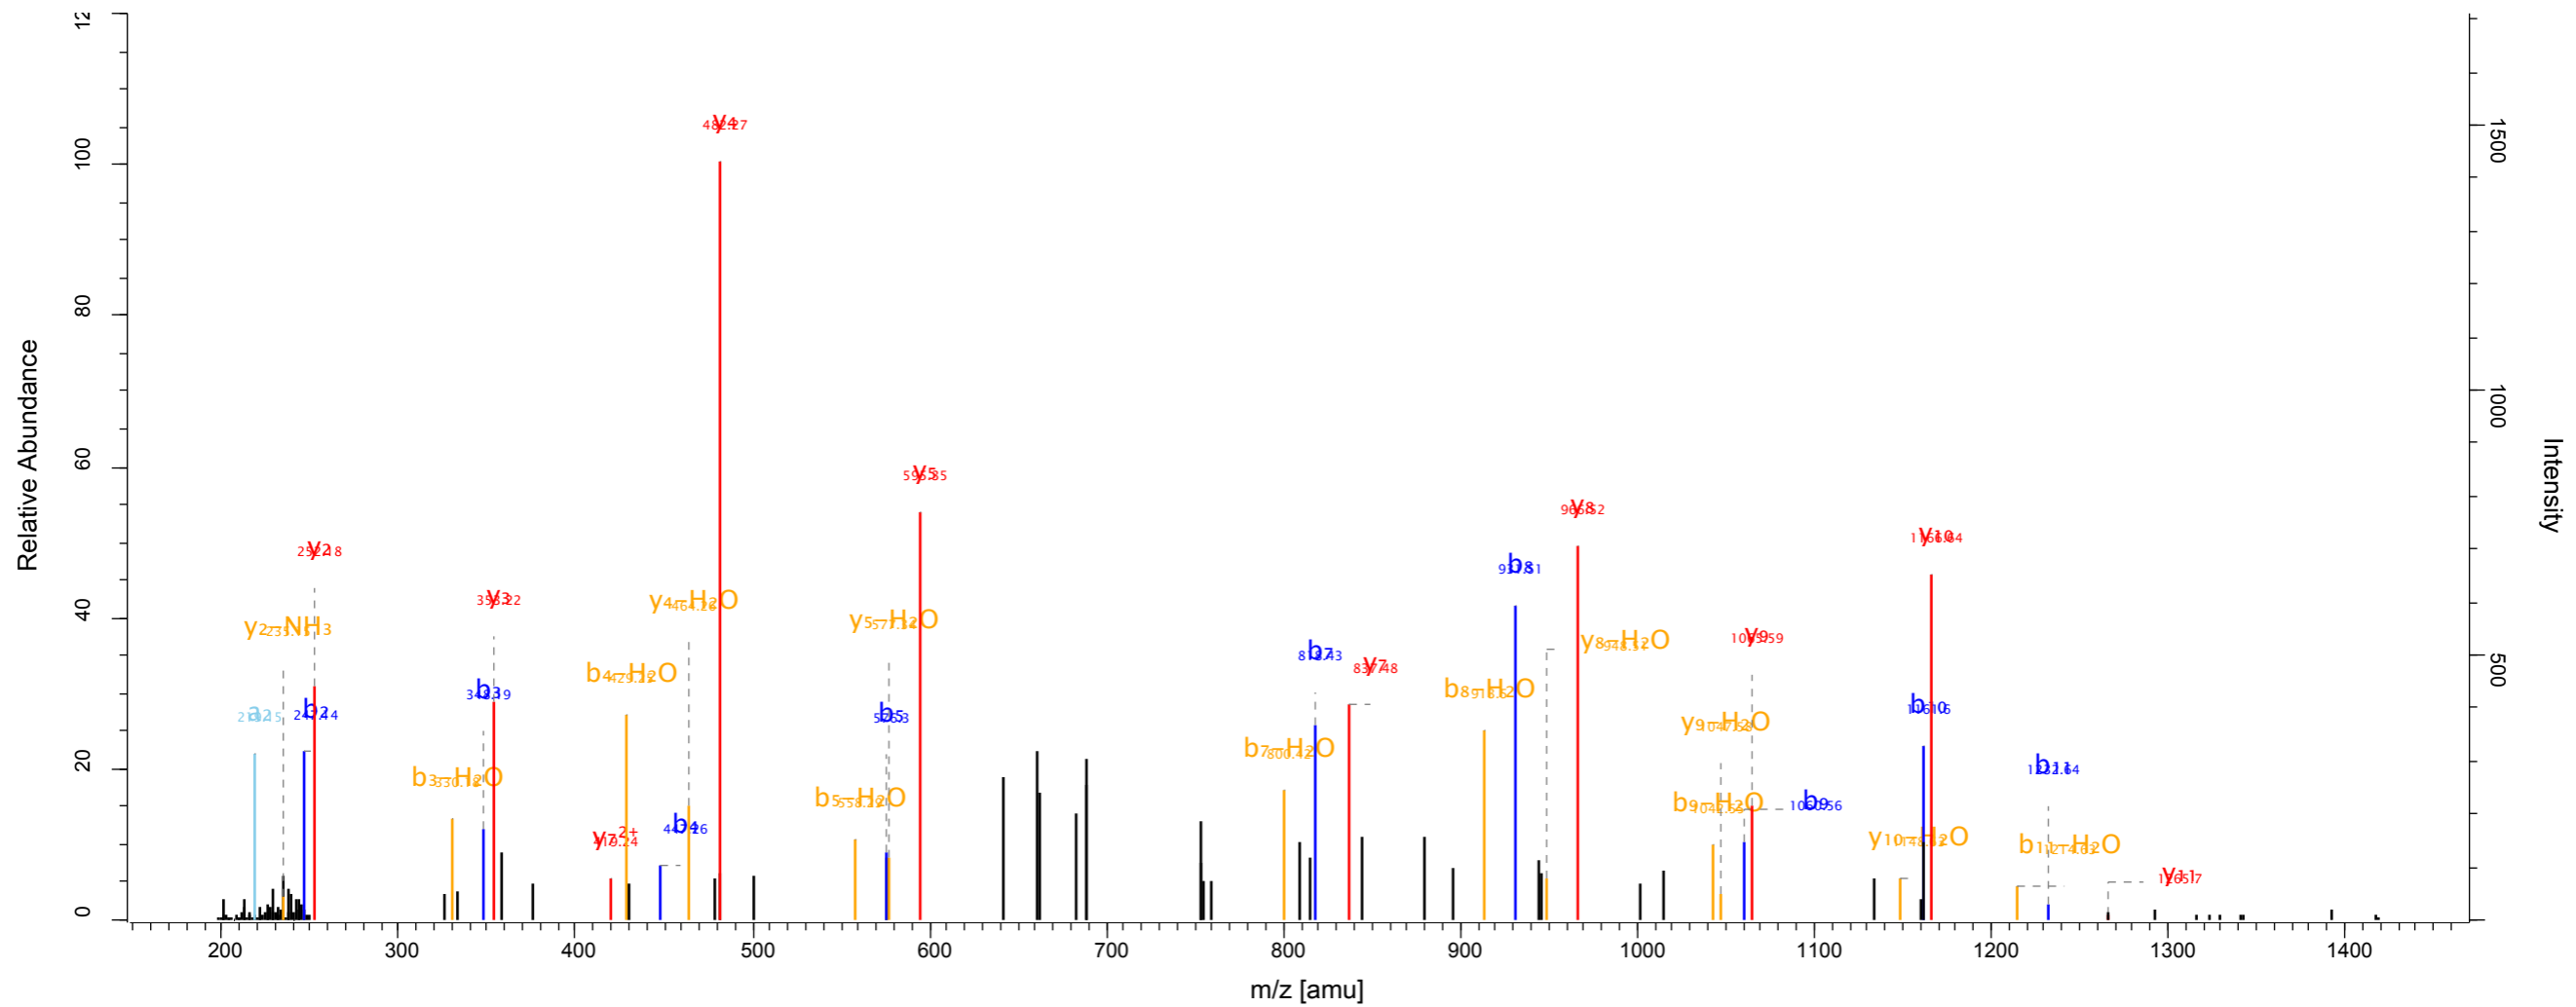

|             |           |          |                                       |
|-------------|-----------|----------|---------------------------------------|
| Scan number | 9139      | Raw file | SKaraca_LMB_H1_reverse_180811_13_rep1 |
| Method      | ITMS; CID | Pepti... | 92.94                                 |

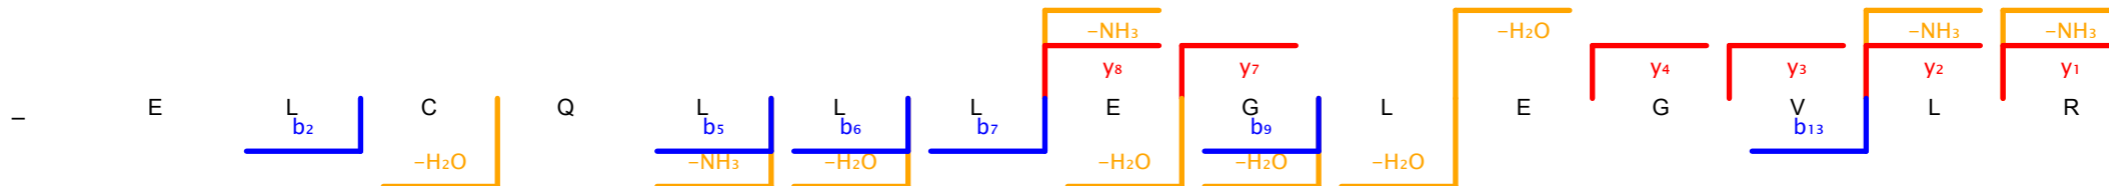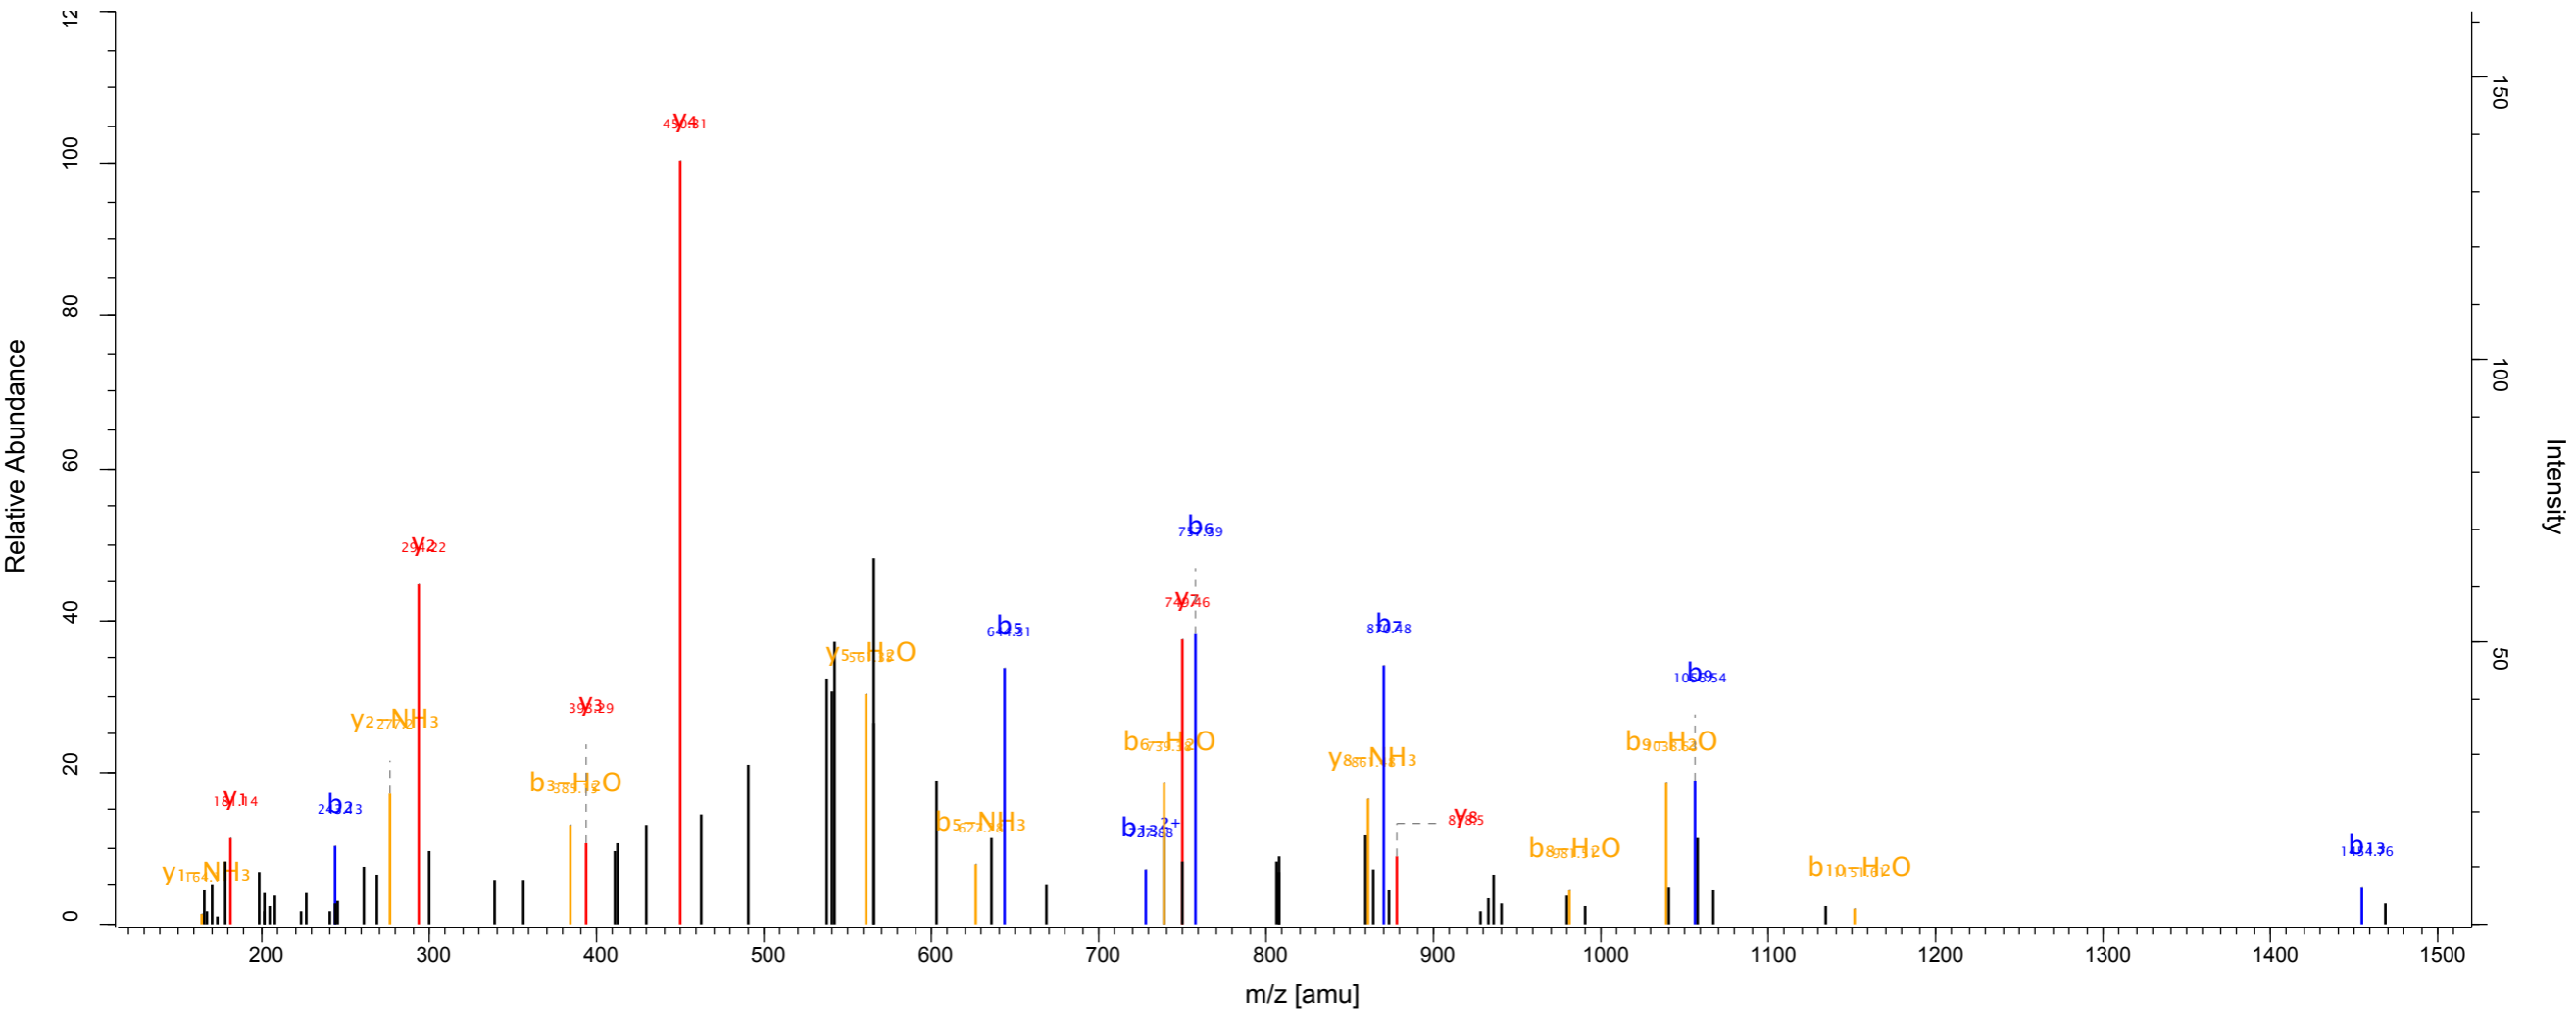

Scan number 9173 Raw file SKaraca\_LMB\_H1\_reverse\_180811\_13\_rep1  
 Method ITMS; CID Pepti... 162.29

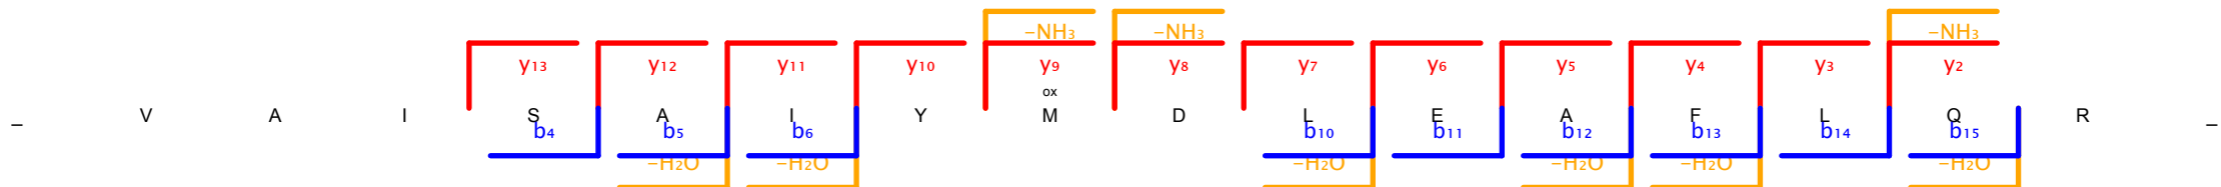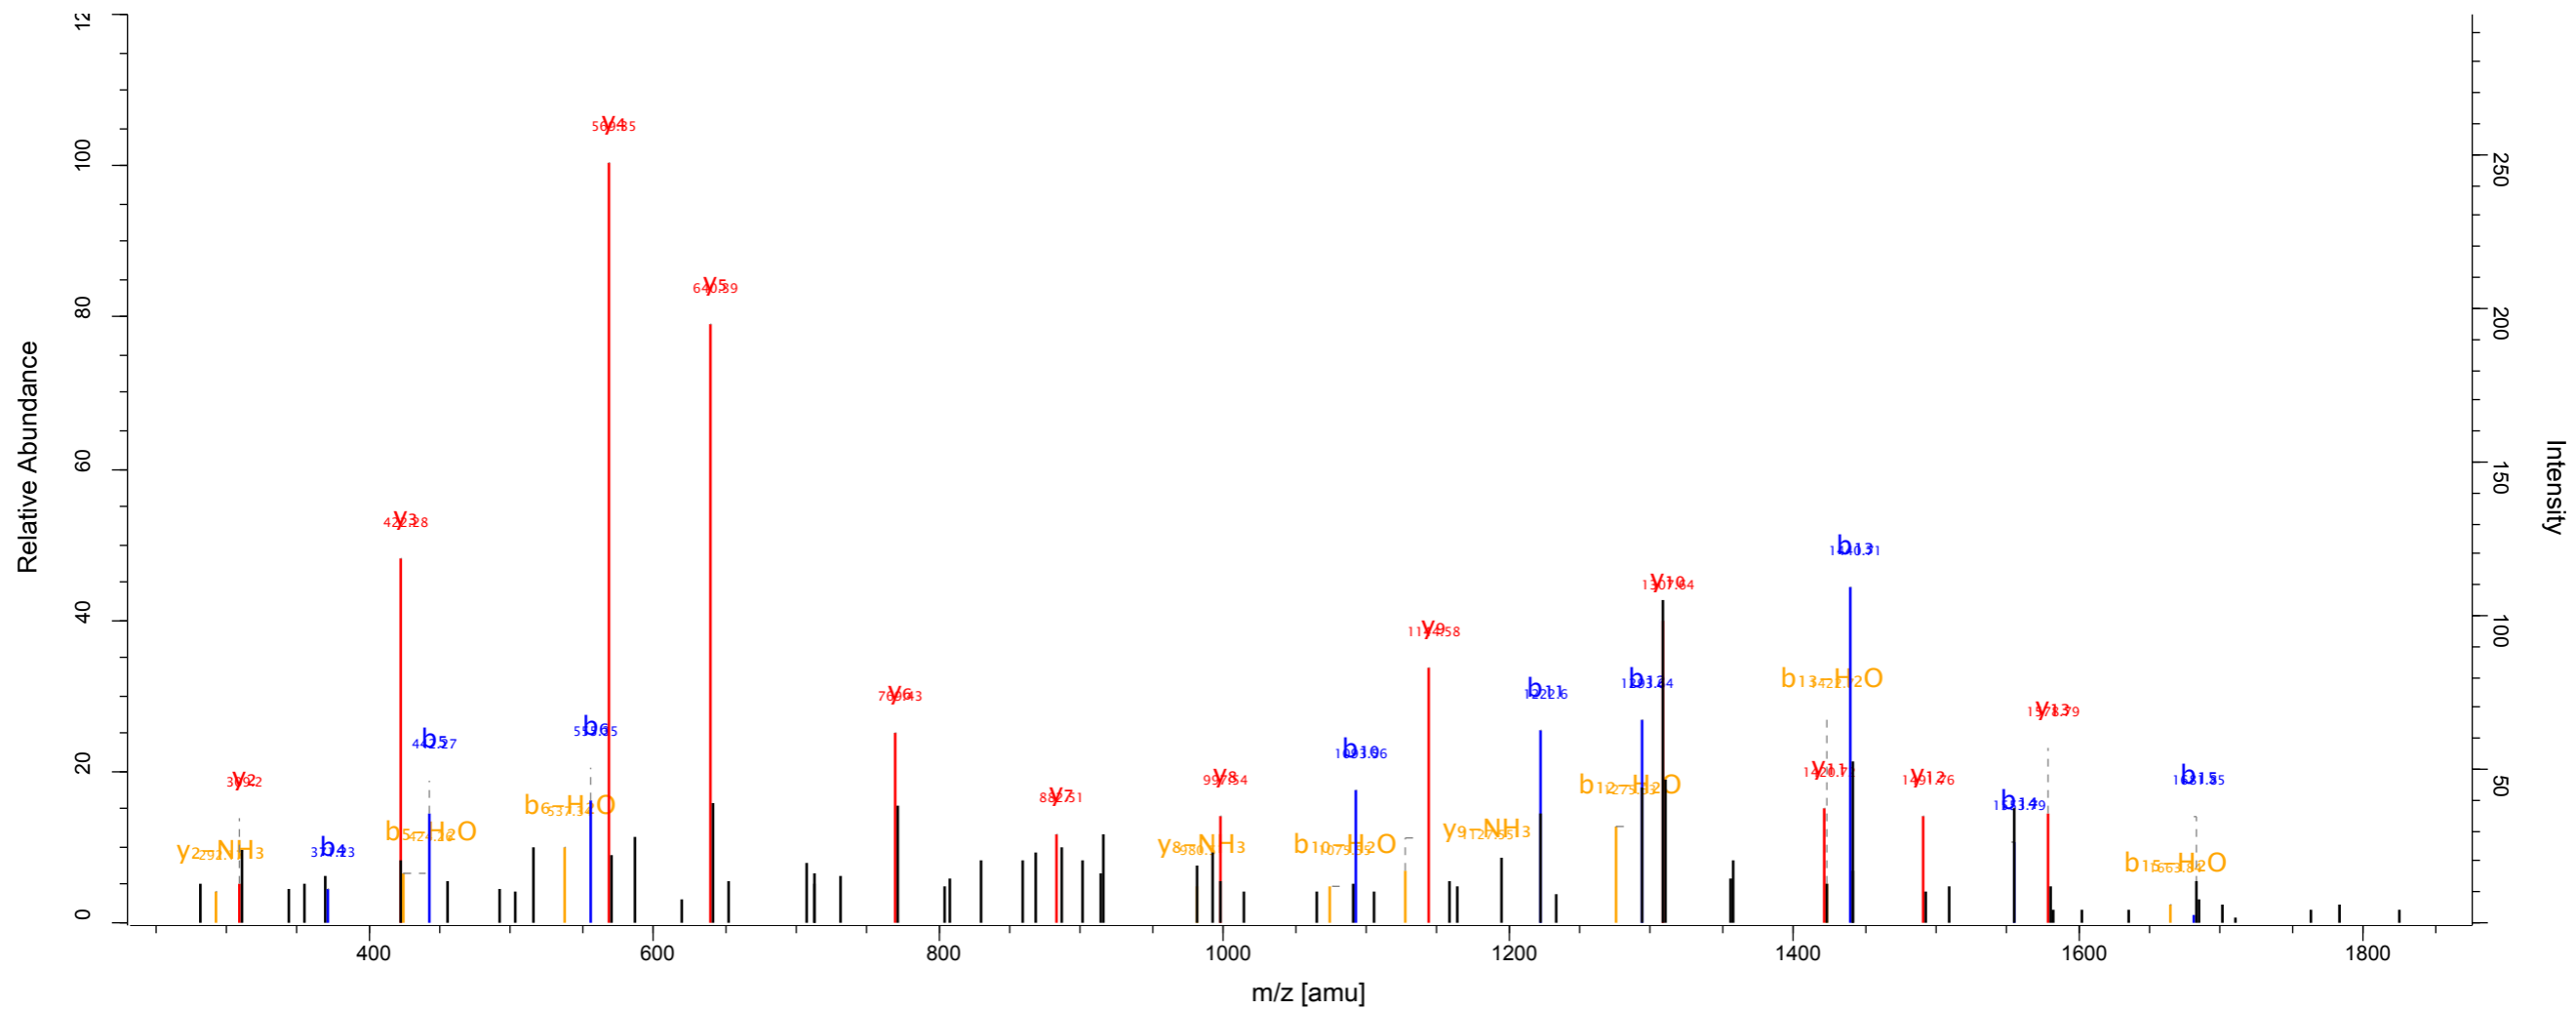

Scan number 6749 Raw file SKaraca\_LMB\_H1\_reverse\_180811\_14\_rep2  
 Method ITMS; CID Pepti... 119.88

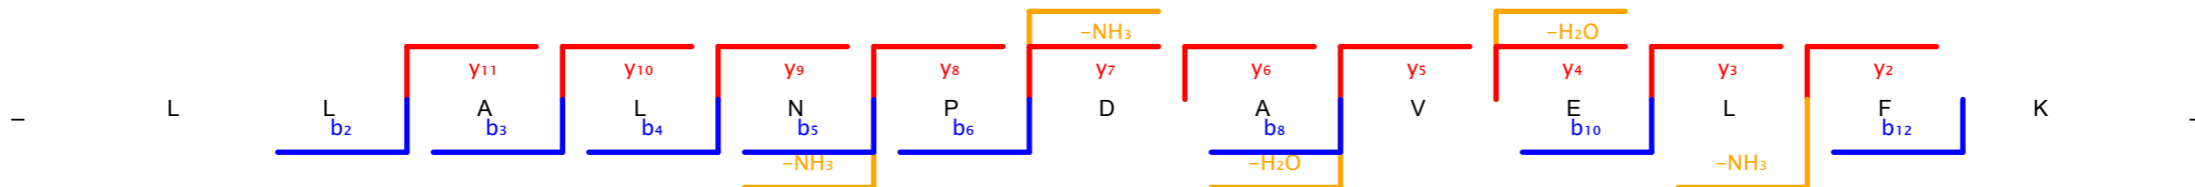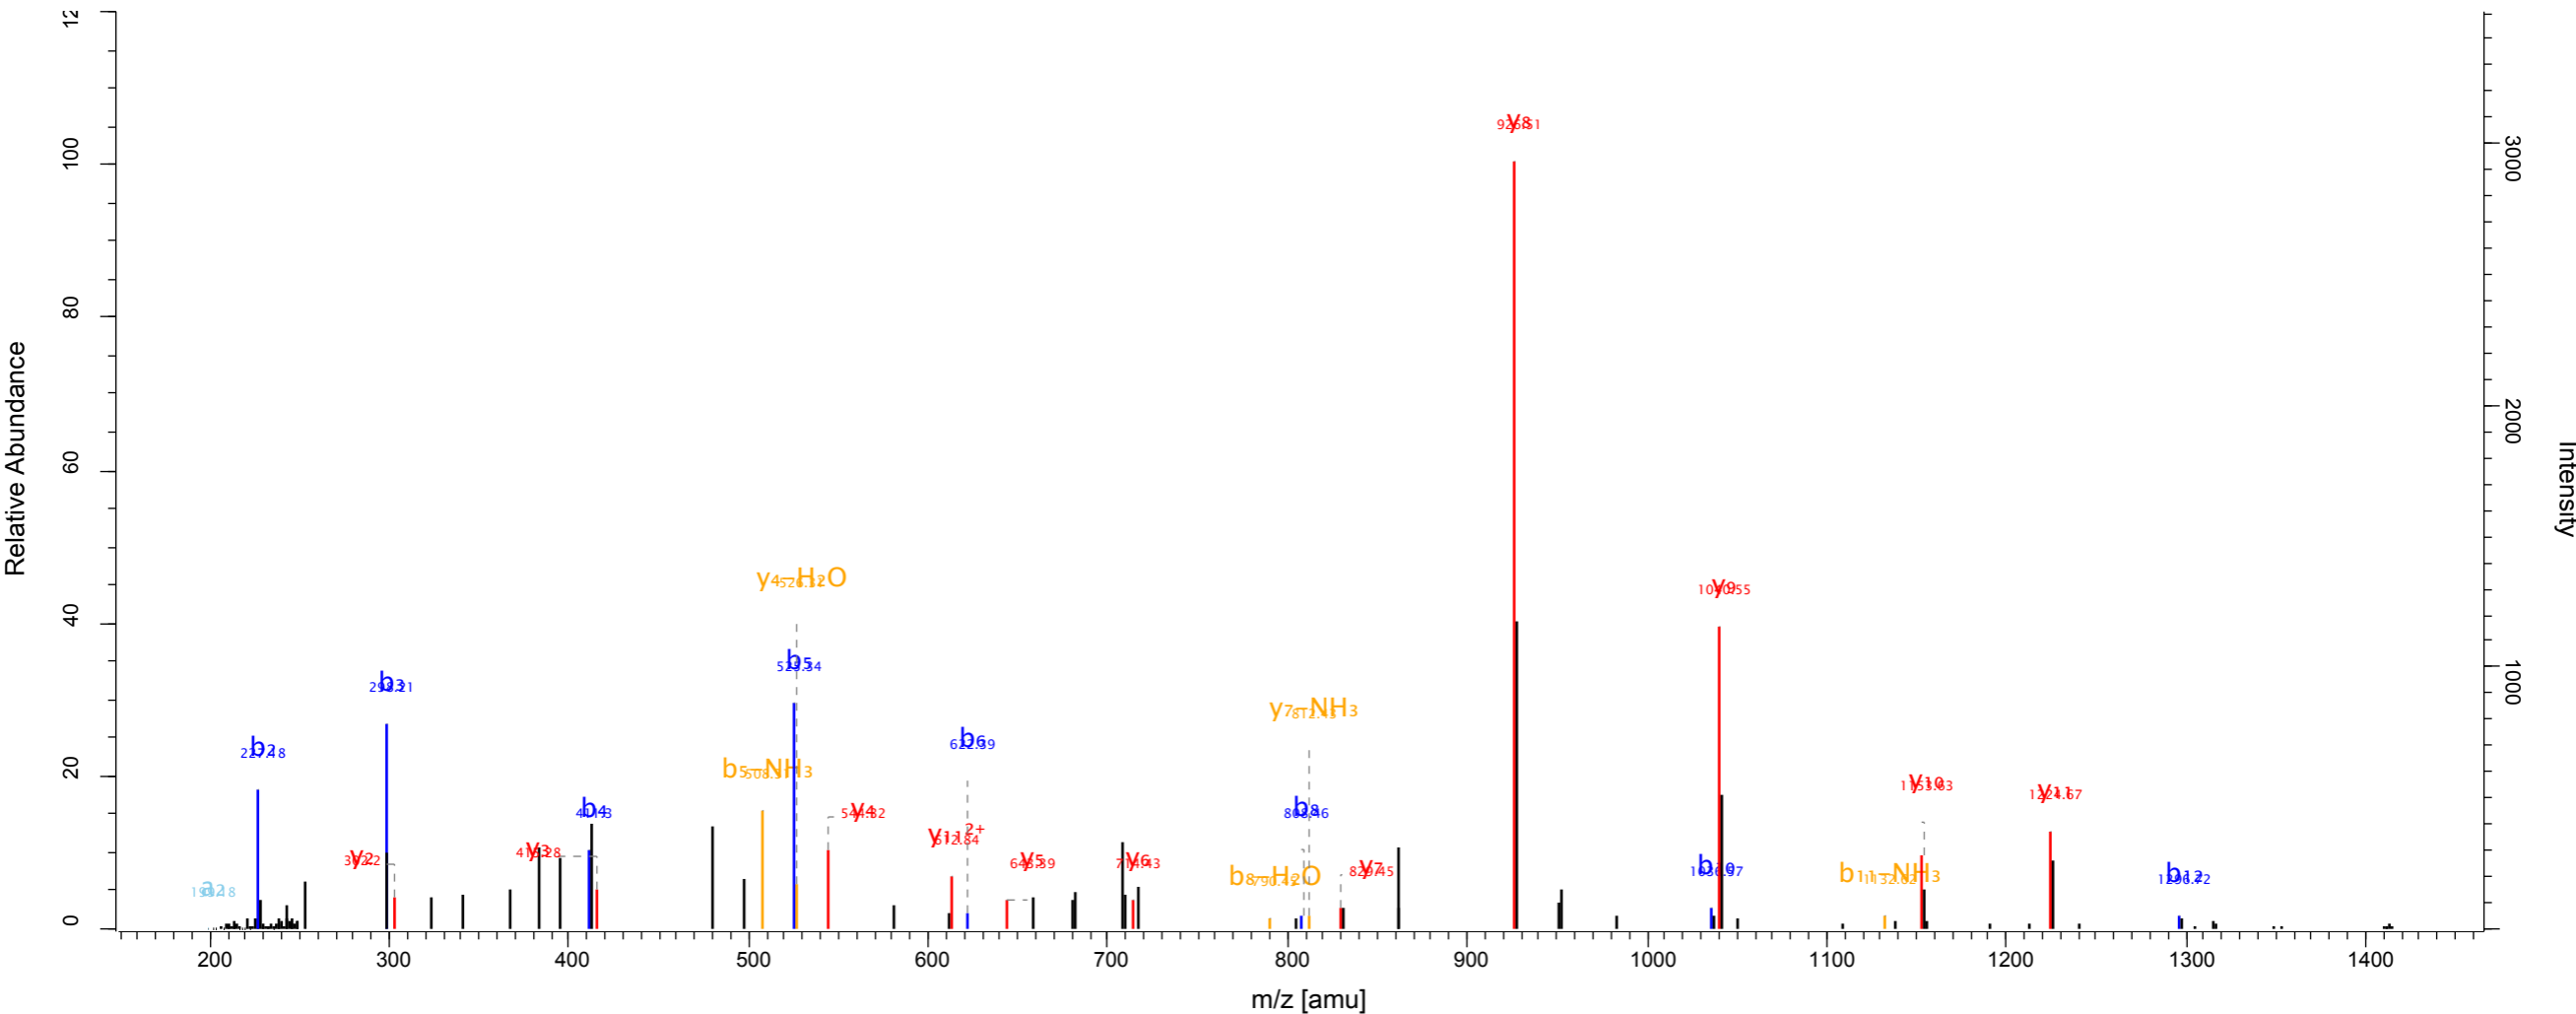

Scan number 6179 Raw file SKaraca\_LMB\_H1\_reverse\_180811\_15\_rep2  
 Method ITMS; CID Pepti... 139.46

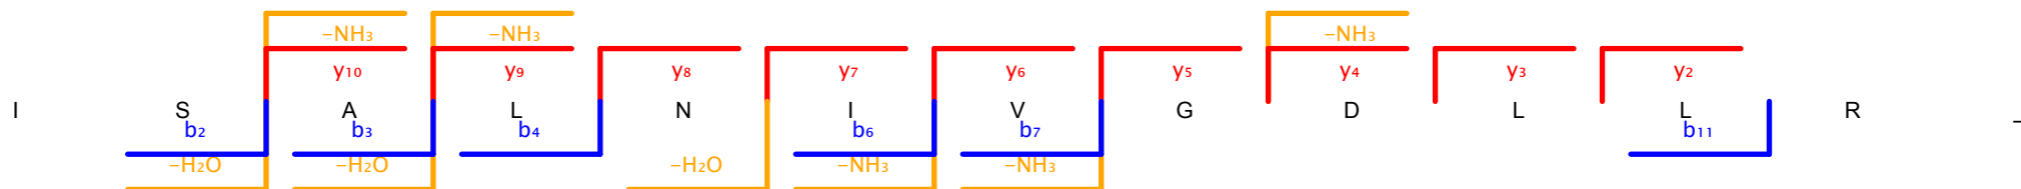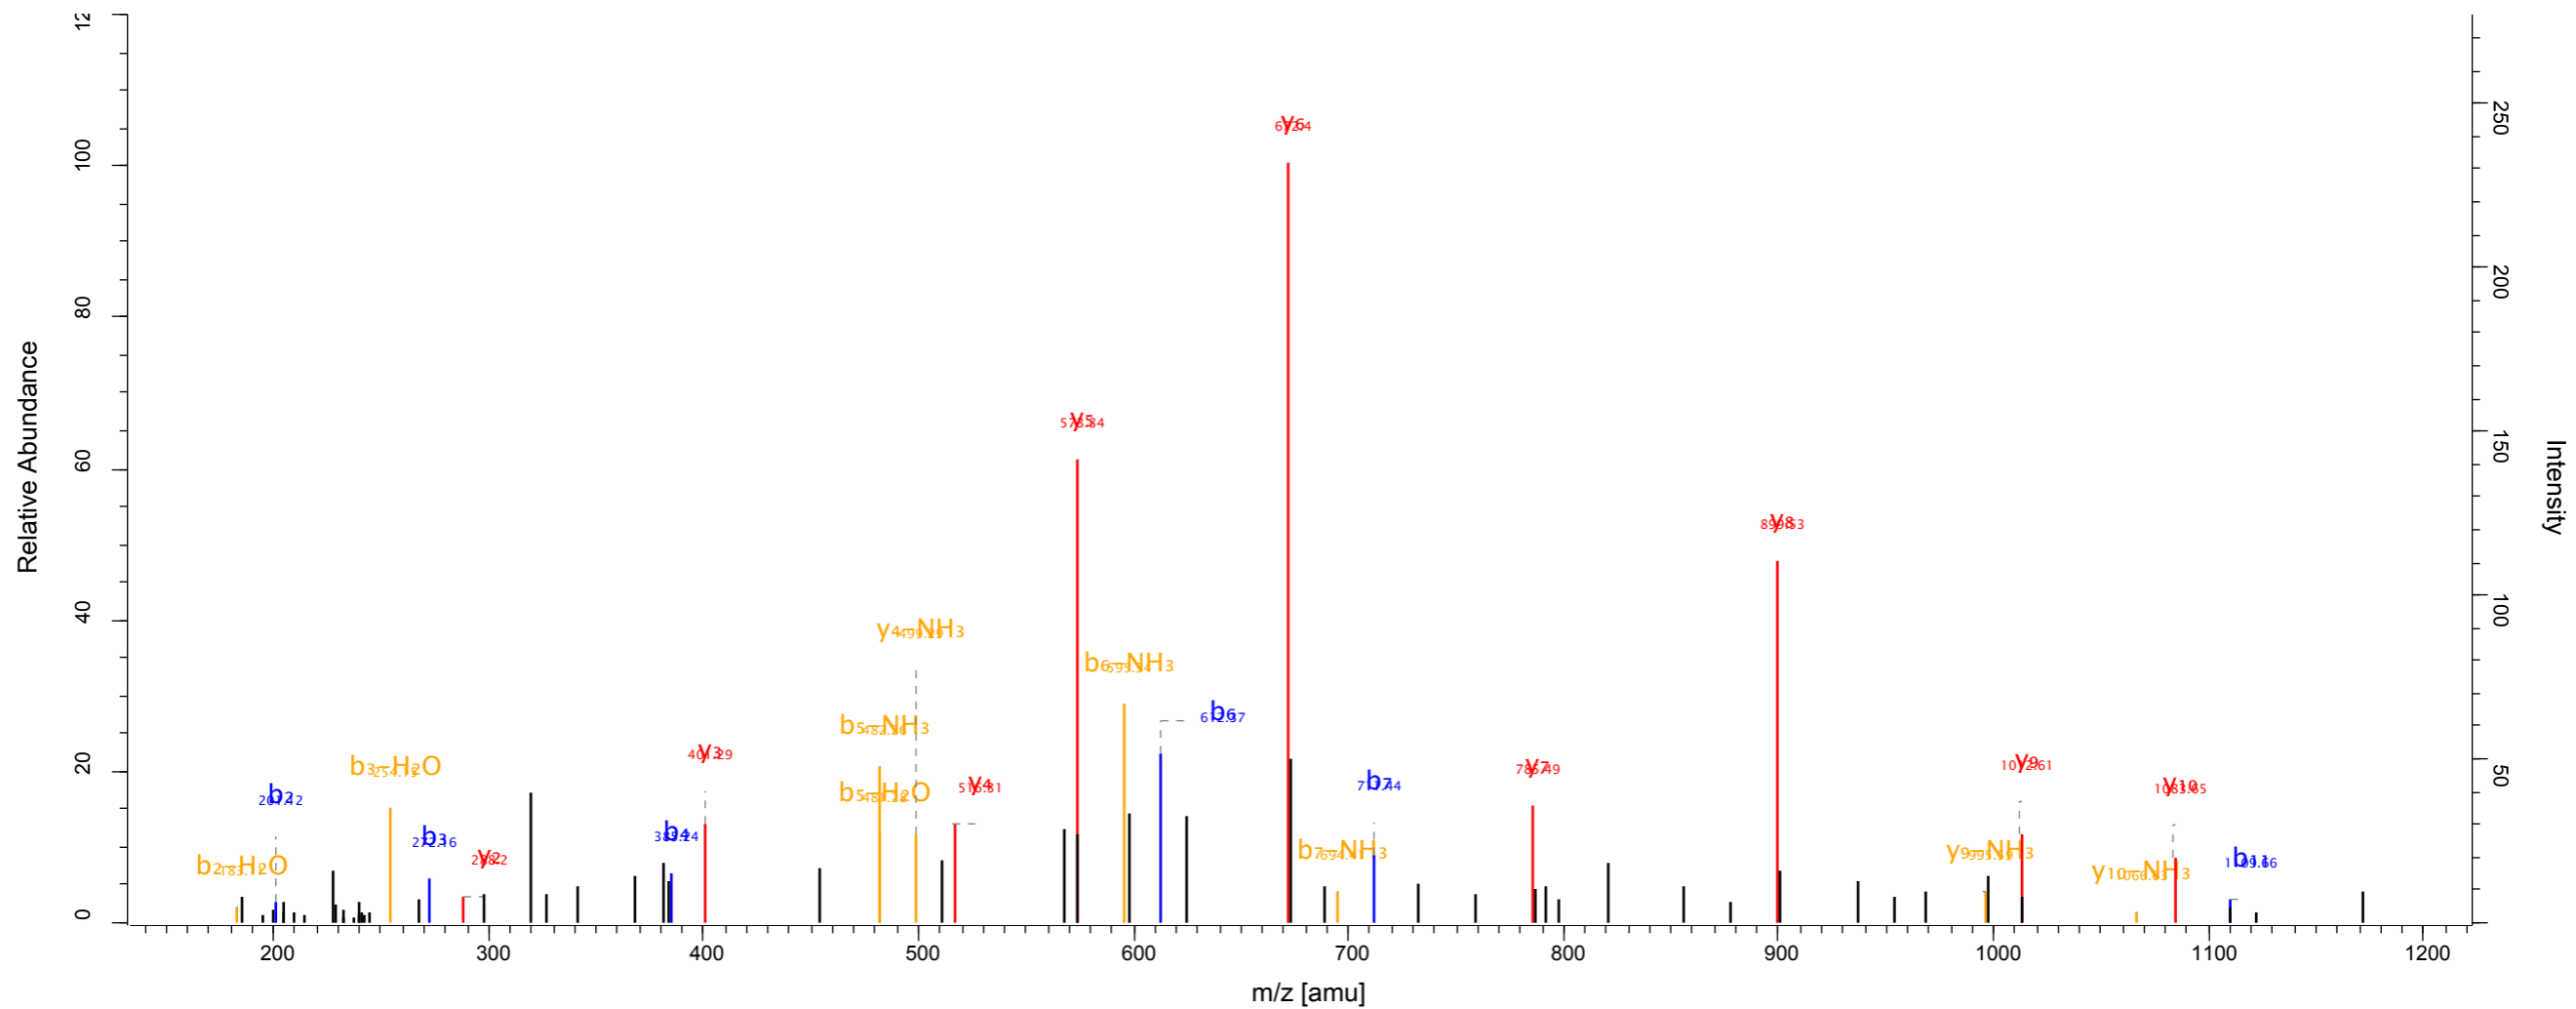

Scan number 7522 Raw file SKaraca\_LMB\_H1\_reverse\_180811\_16\_rep1  
 Method ITMS; CID Pepti... 189.1

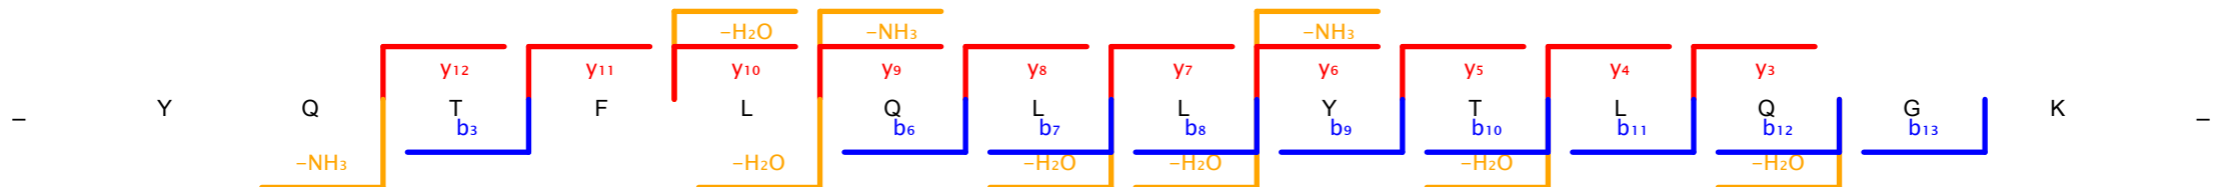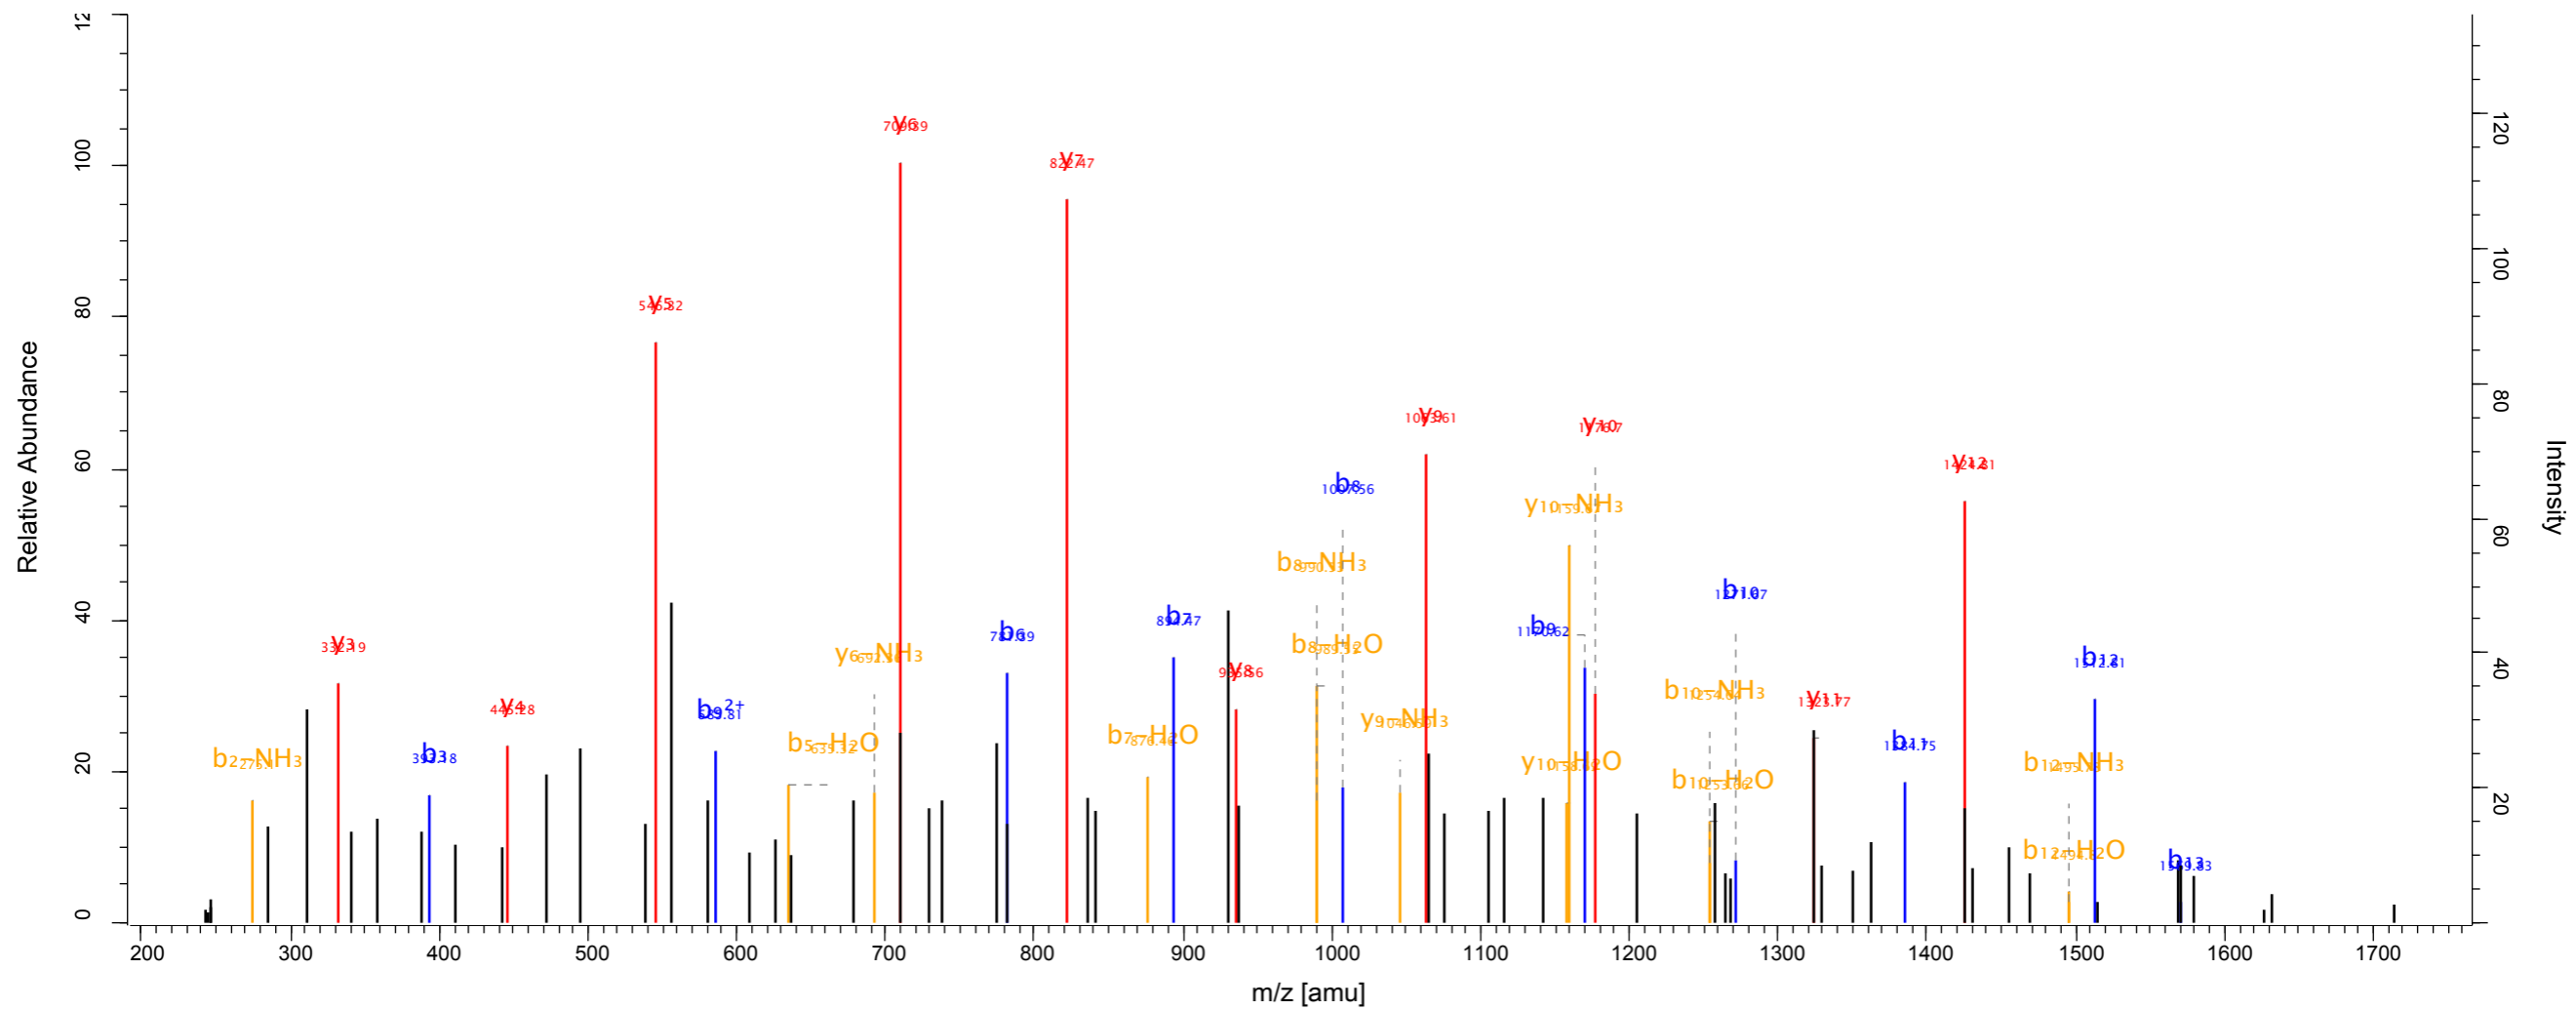

Scan number 6376 Raw file SKaraca\_LMB\_H1\_reverse\_180811\_17\_rep1  
 Method ITMS; CID Pepti... 194.5

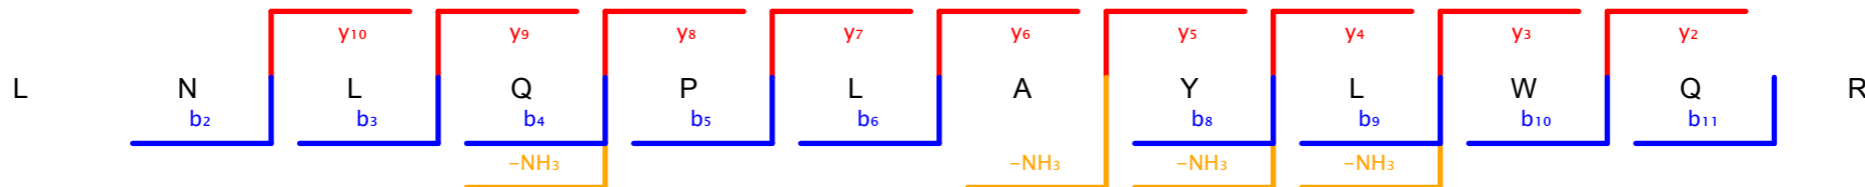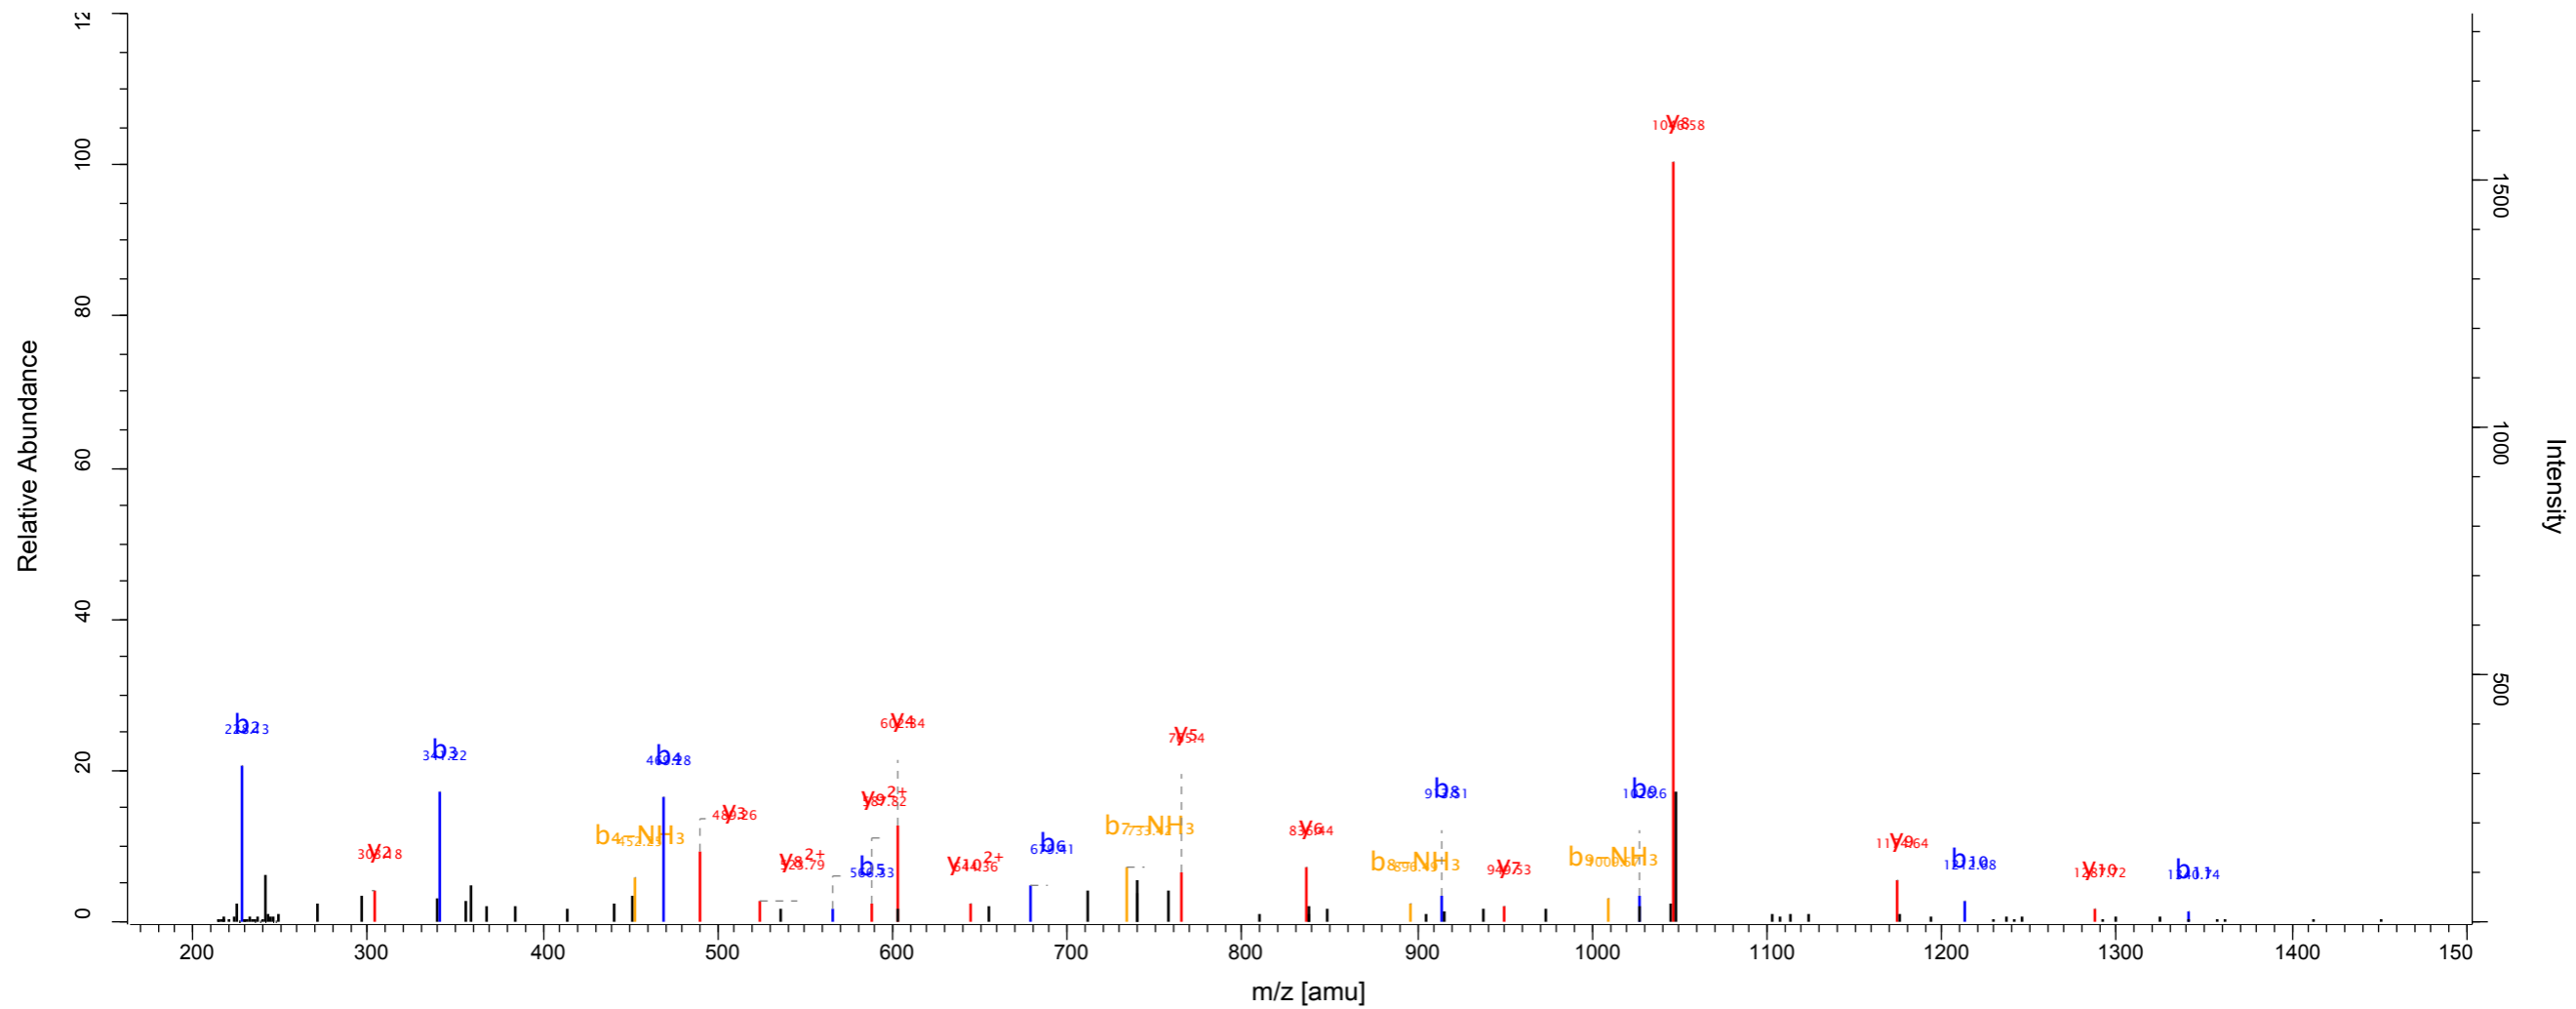

Scan number 7241 Raw file SKaraca\_LMB\_H1\_reverse\_180811\_18\_rep1  
 Method ITMS; CID Pepti... 216.54

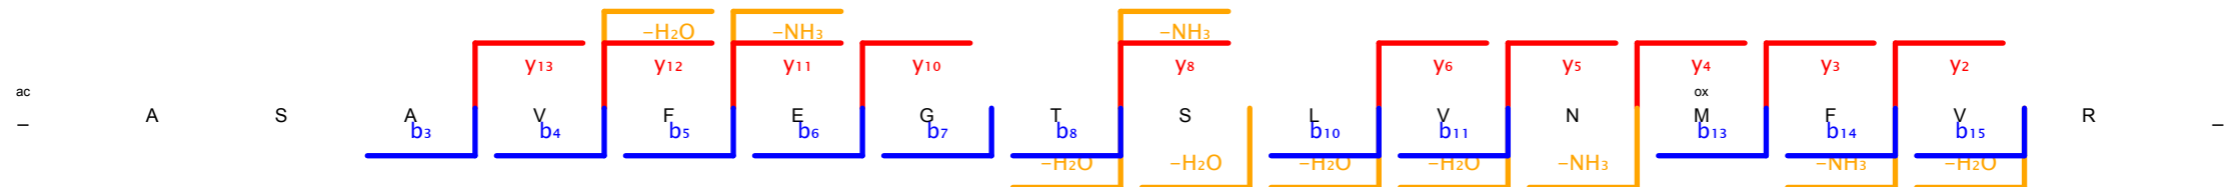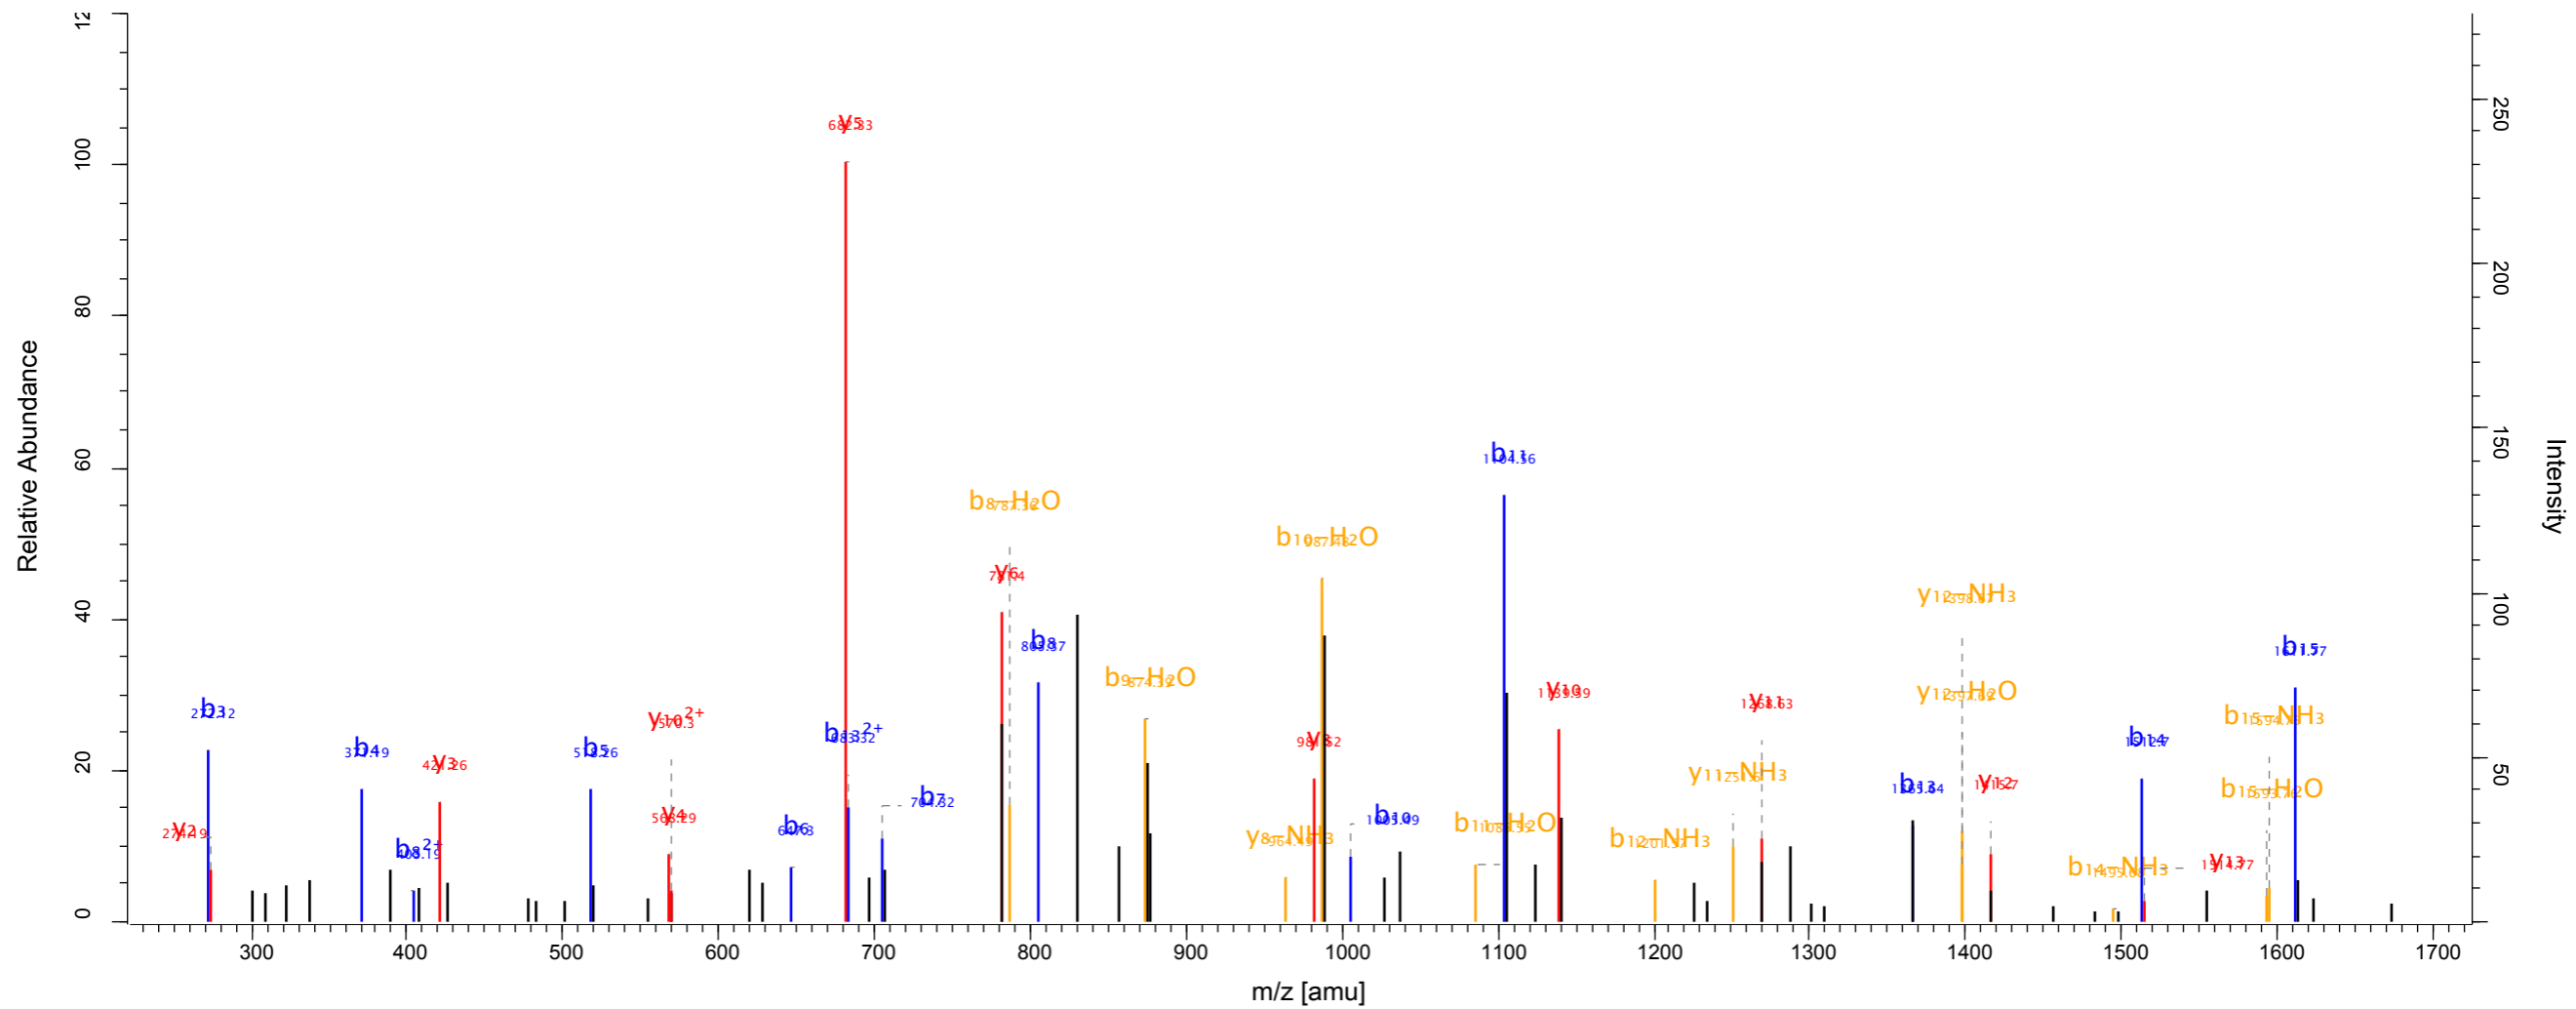



Scan number 7377 Raw file SKaraca\_LMB\_H1\_reverse\_180811\_18\_rep1  
 Method ITMS; CID Pepti... 336.85

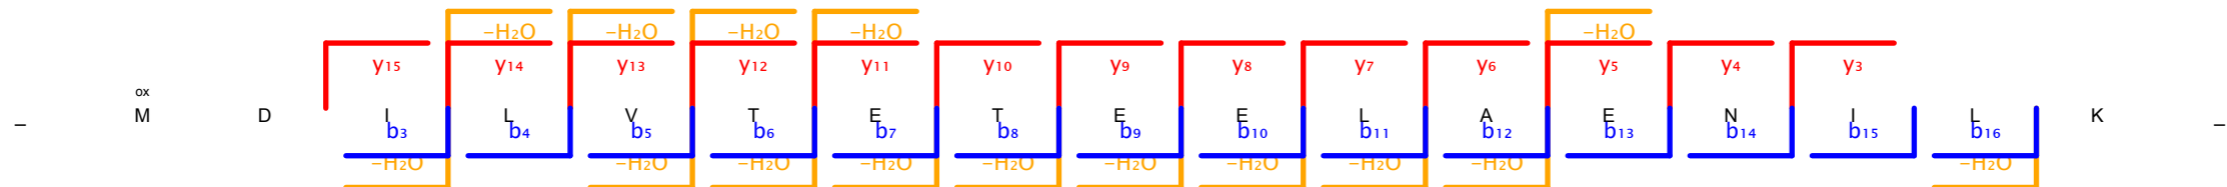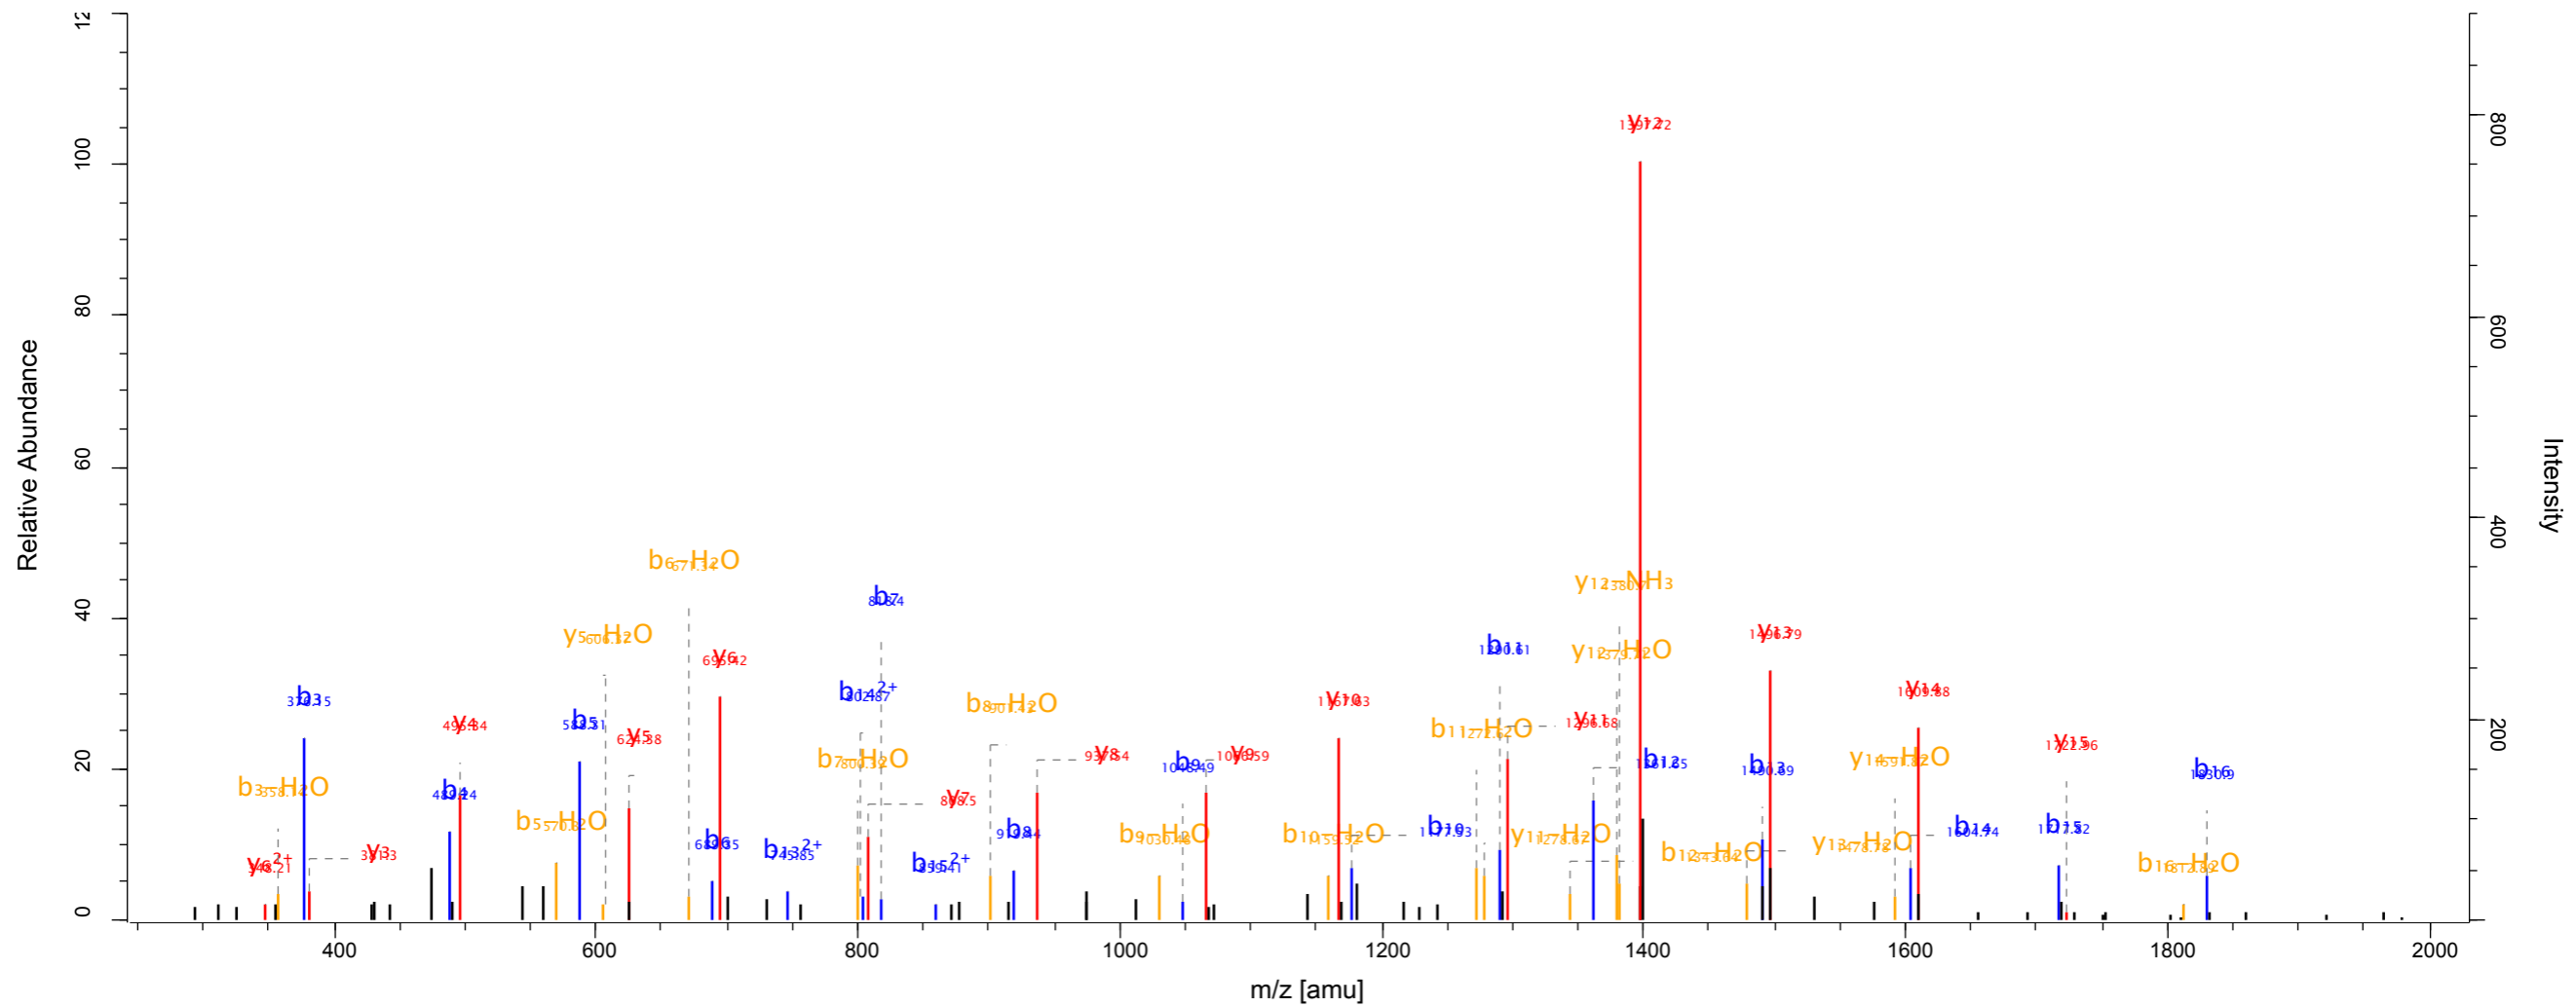

|             |           |          |                                       |
|-------------|-----------|----------|---------------------------------------|
| Scan number | 7391      | Raw file | SKaraca_LMB_H1_reverse_180811_18_rep1 |
| Method      | ITMS; CID | Pepti... | 114.46                                |

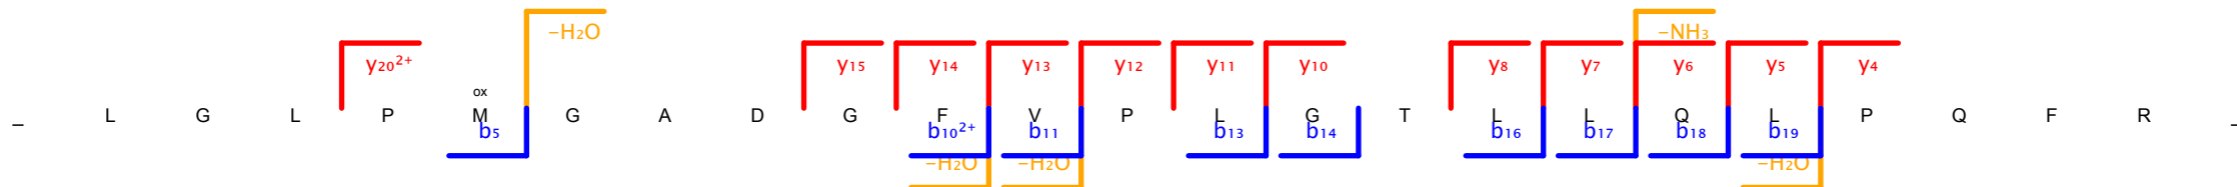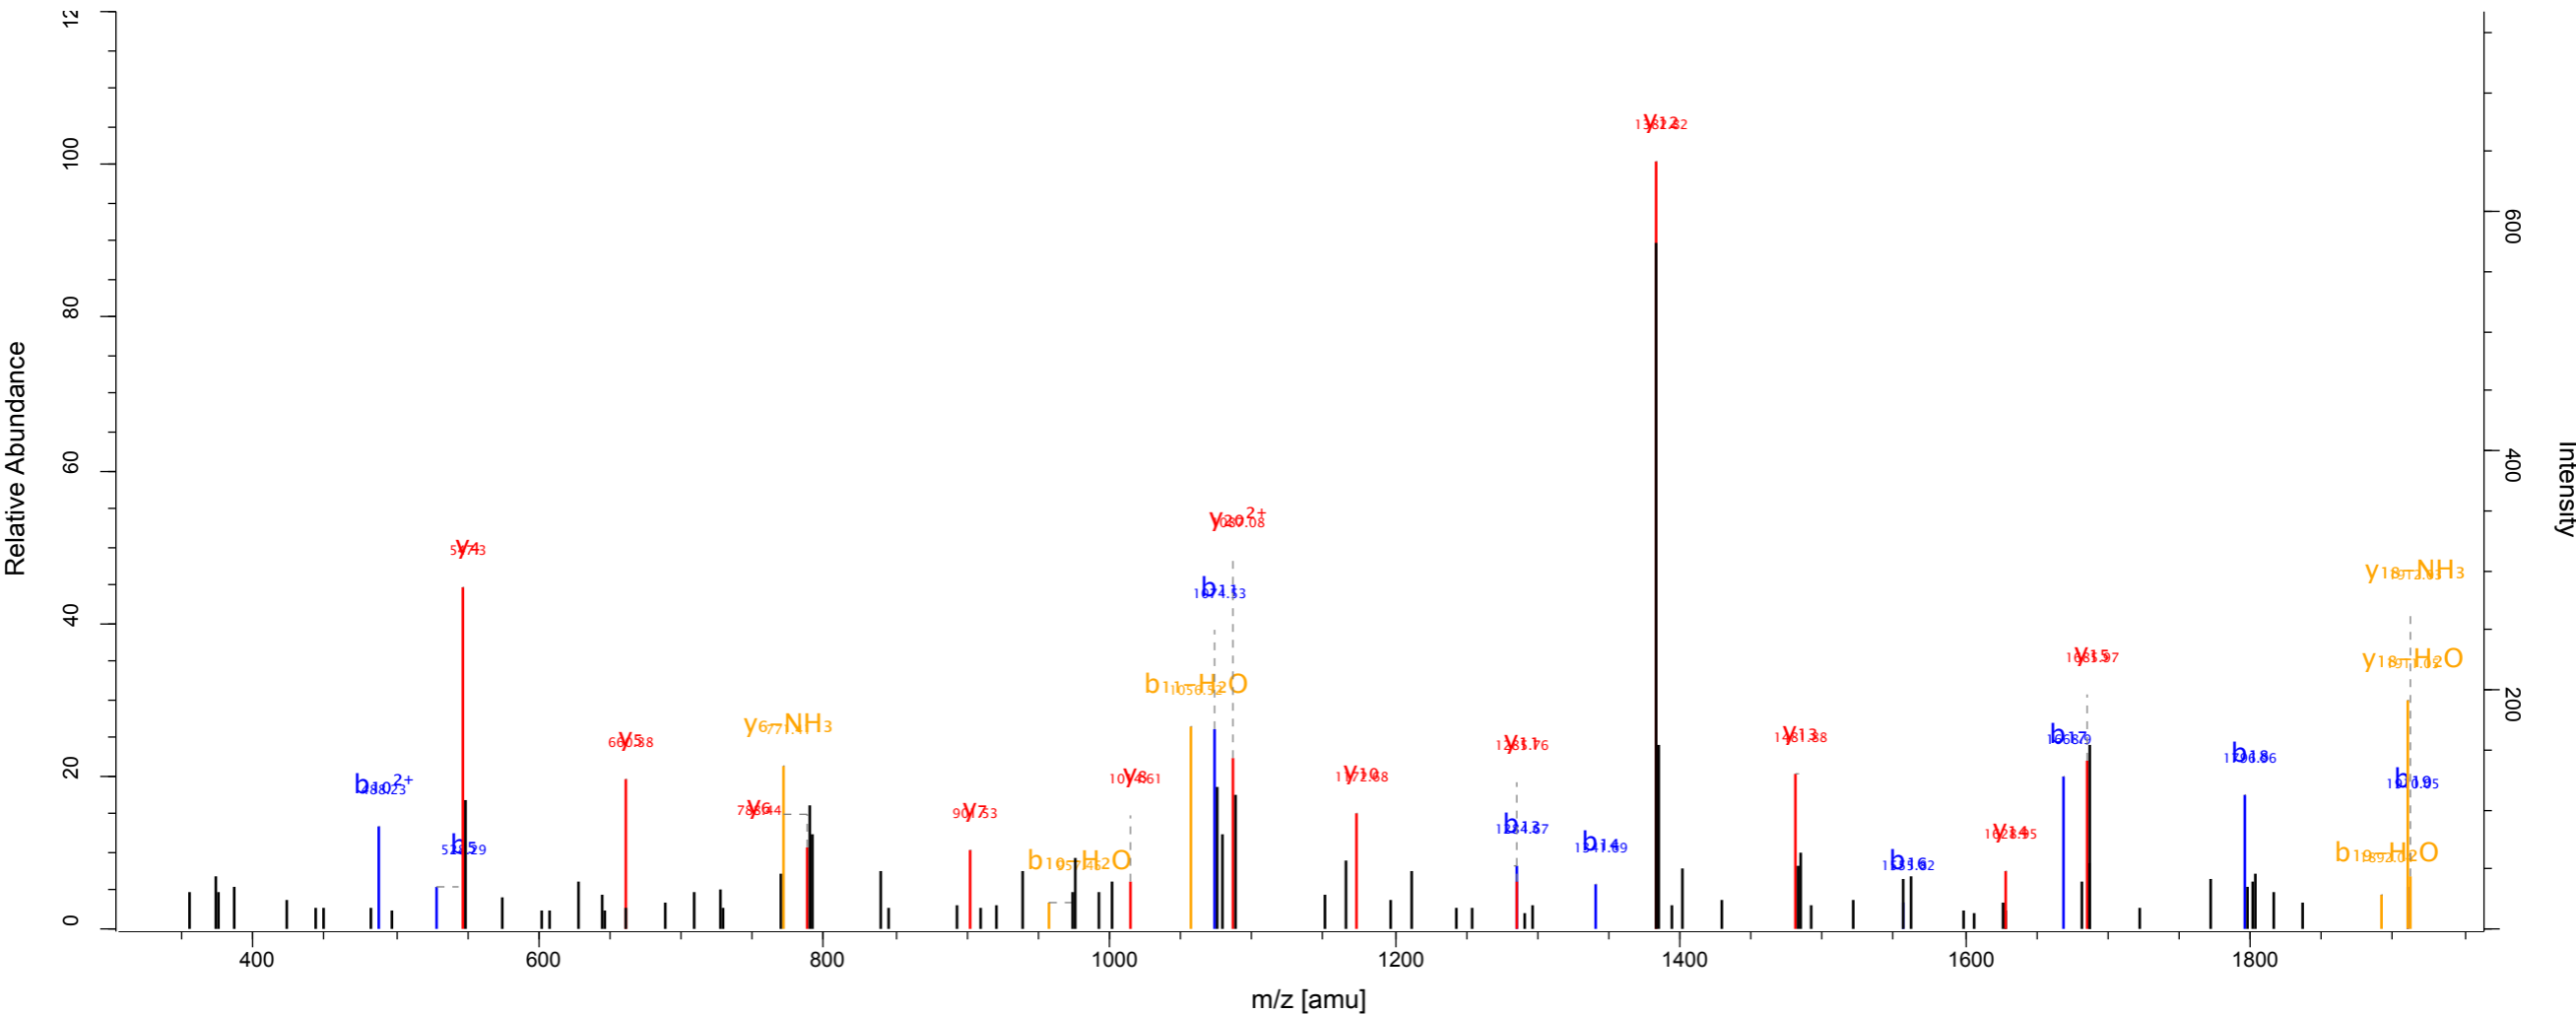

Scan number 3526 Raw file SKaraca\_LMB\_H1\_reverse\_180811\_19\_rep2  
 Method ITMS; CID Pepti... 116.55

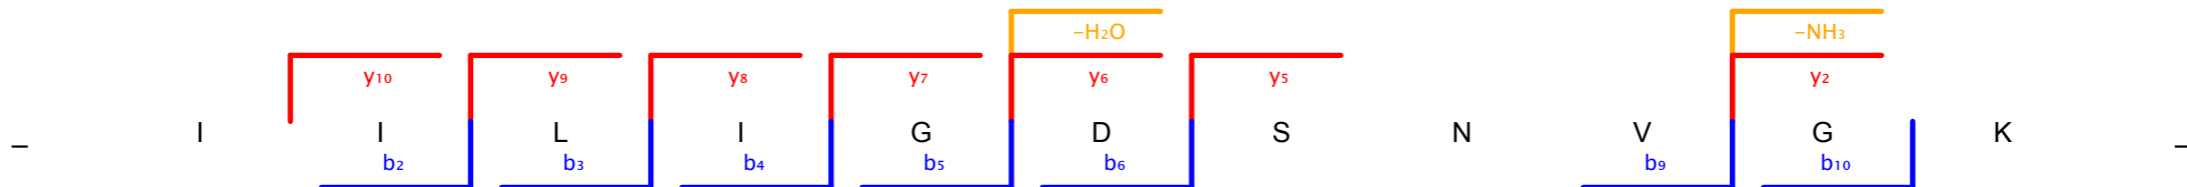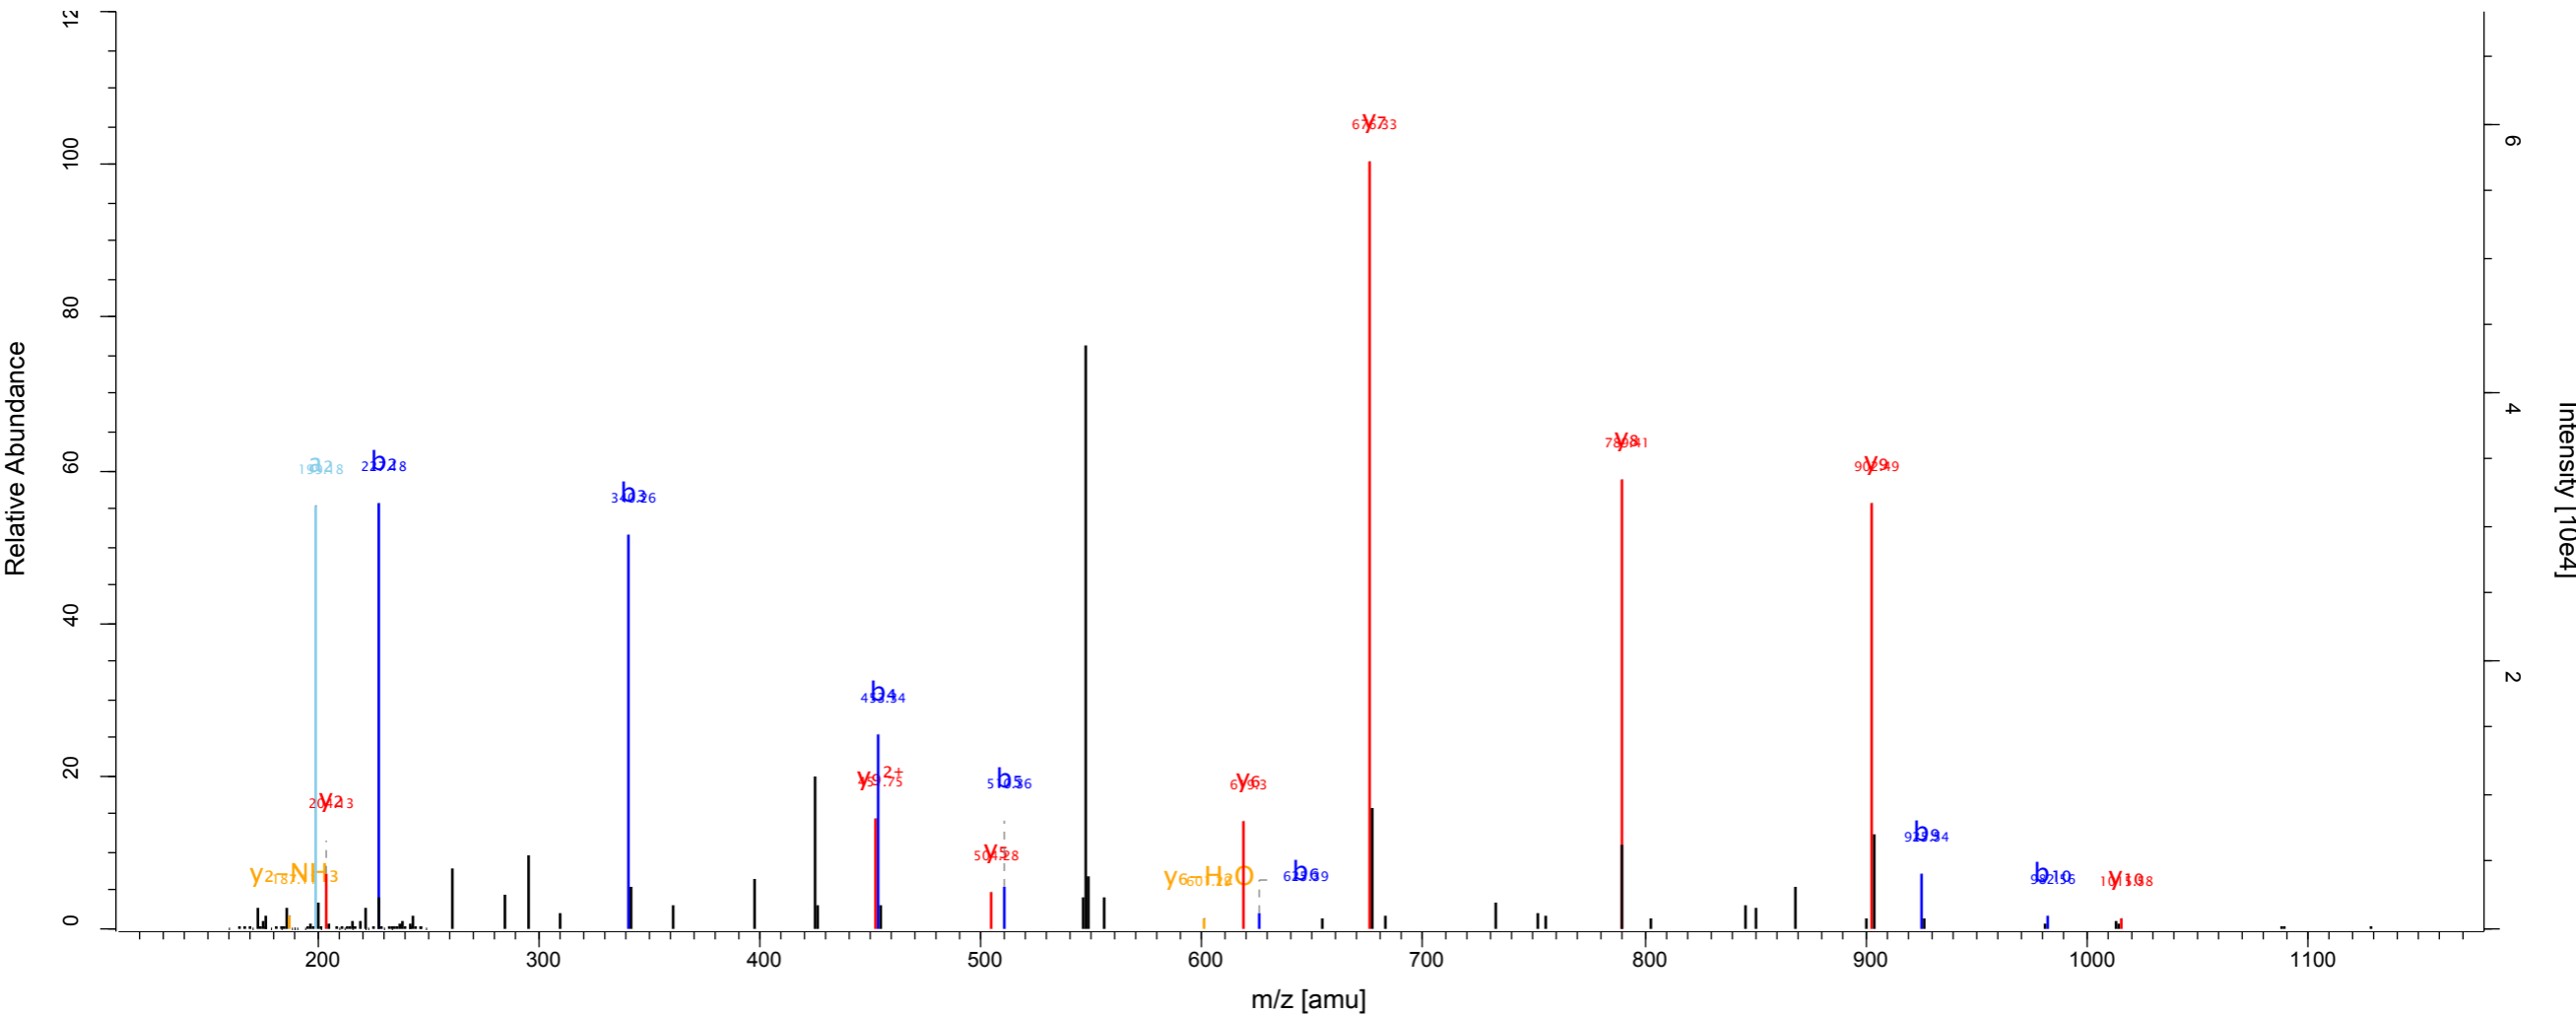

Scan number 3298 Raw file SKaraca\_LMB\_H1\_reverse\_180811\_21\_rep2  
 Method ITMS; CID Pepti... 246.64

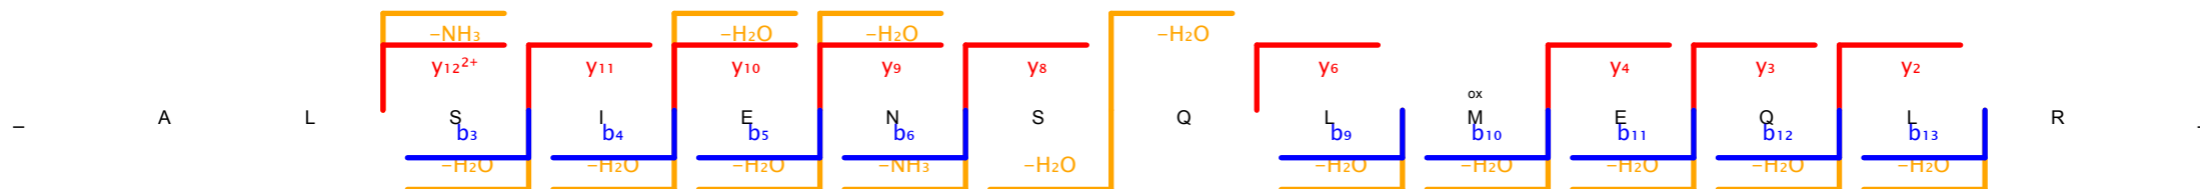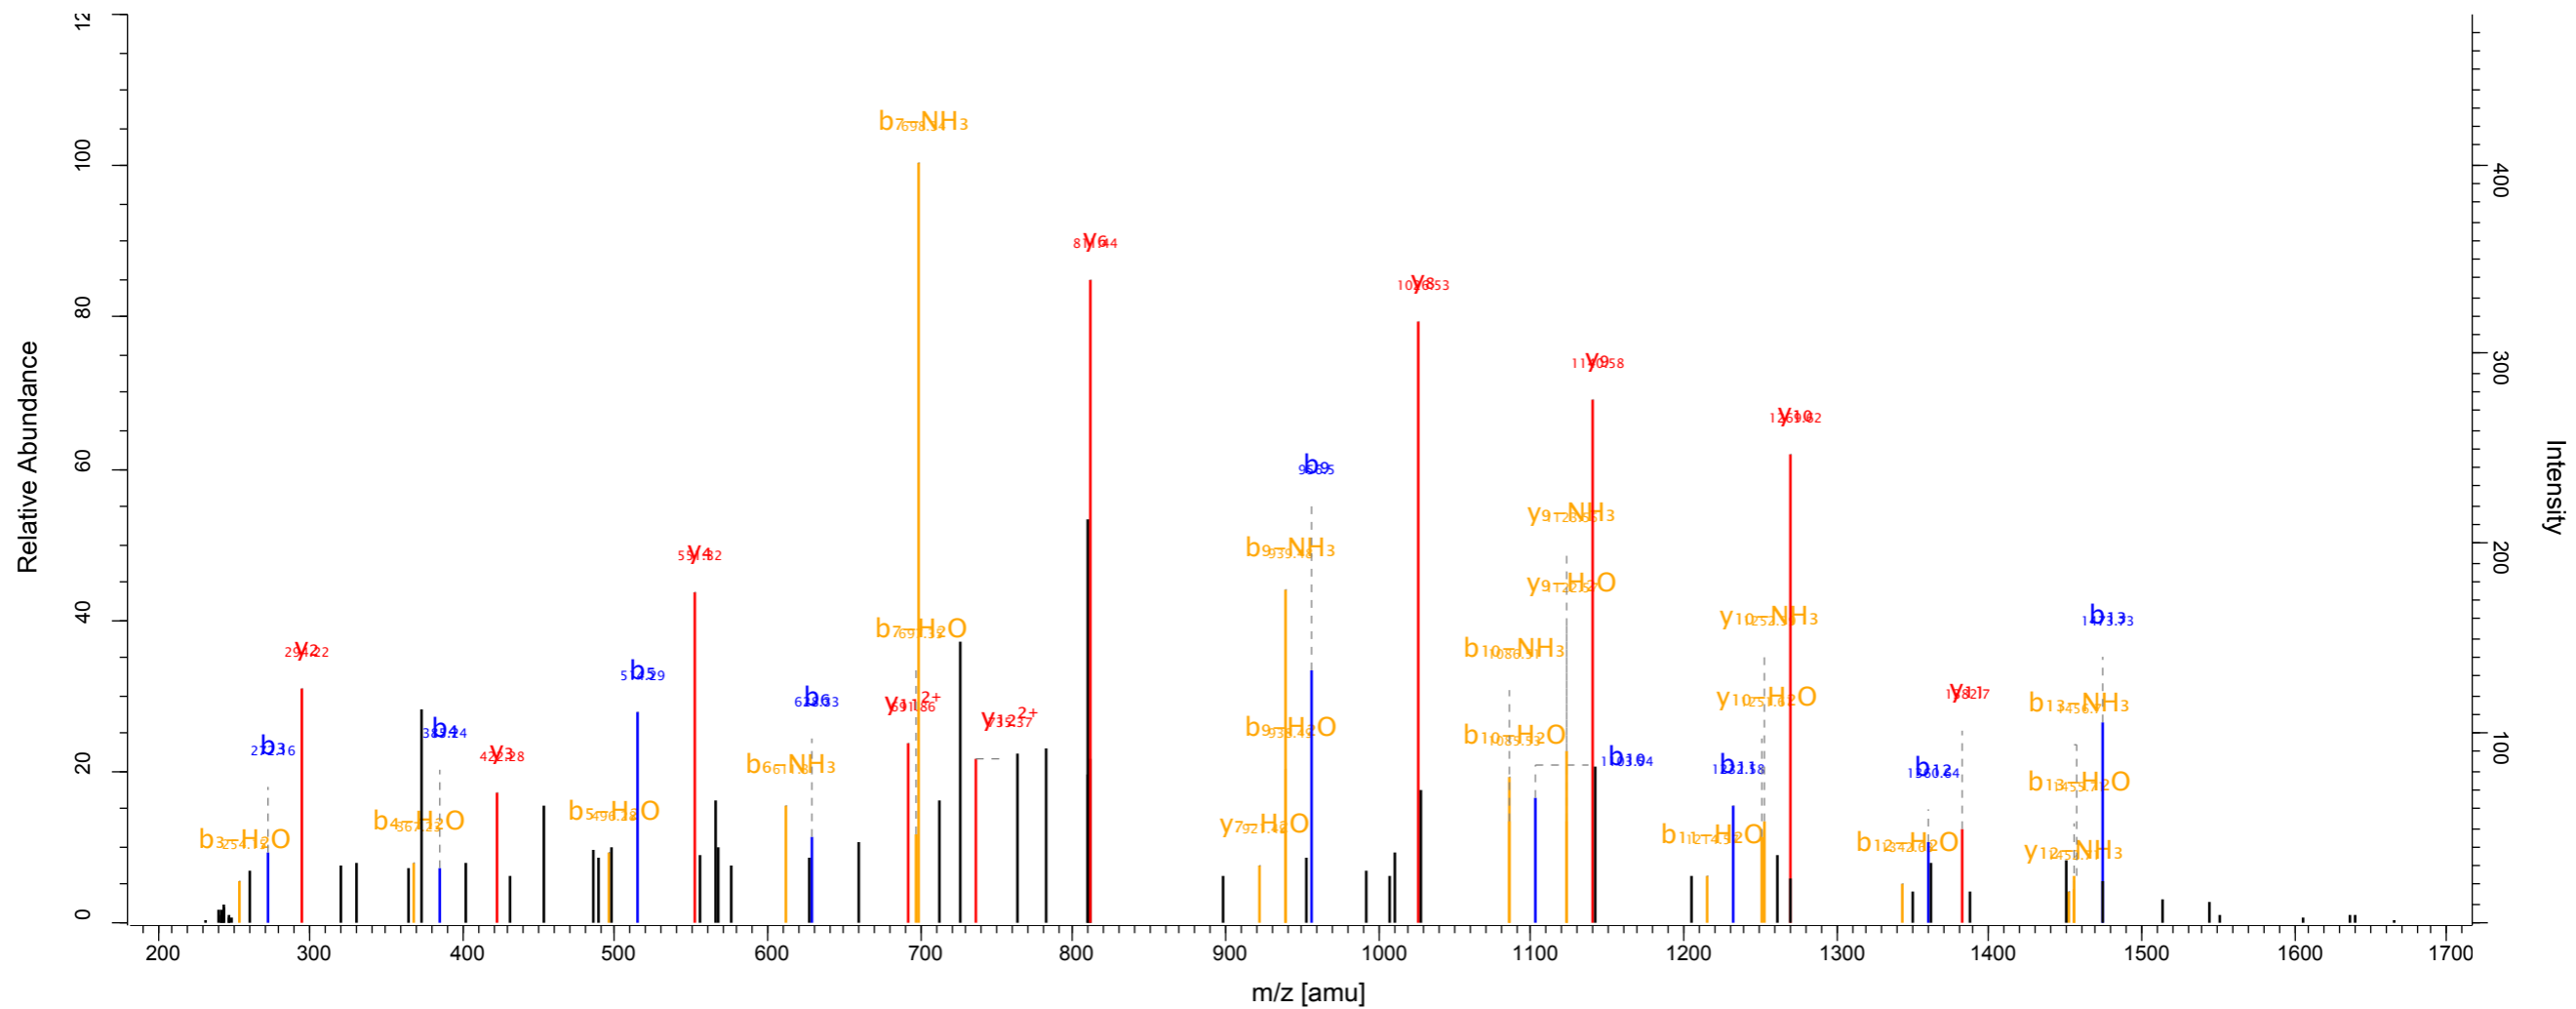

Scan number 8309 Raw file SKaraca\_LMB\_H1\_reverse\_180811\_4\_rep2  
Method ITMS; CID Pepti... 113.99

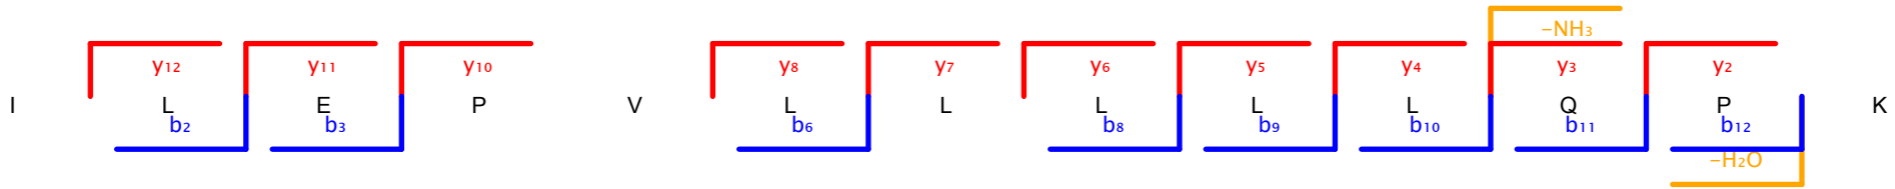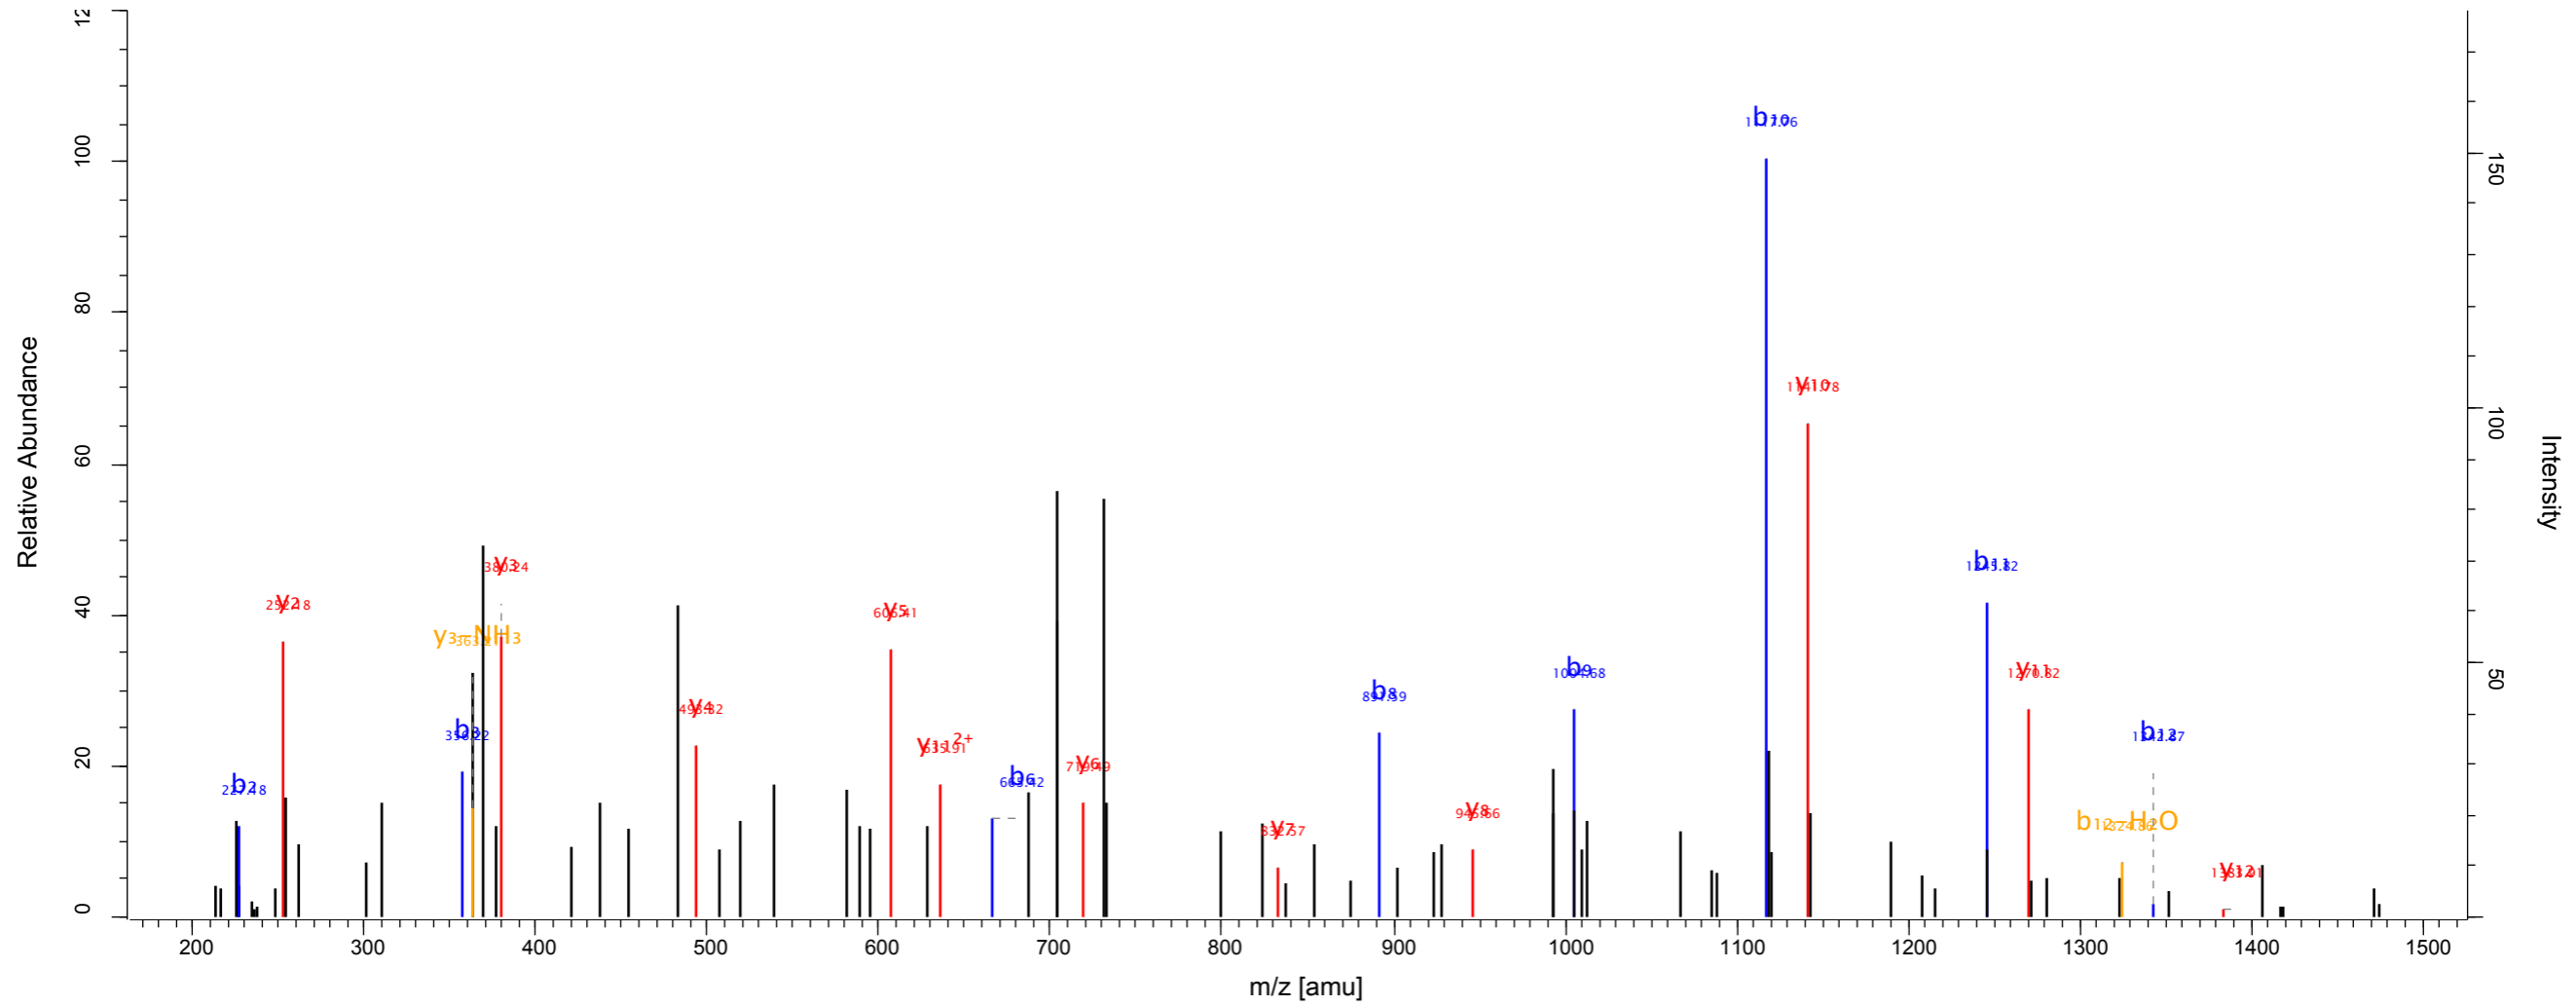

Scan number 5946 Raw file SKaraca\_LMB\_H1\_reverse\_180811\_5\_rep1  
 Method ITMS; CID Pepti... 208.74

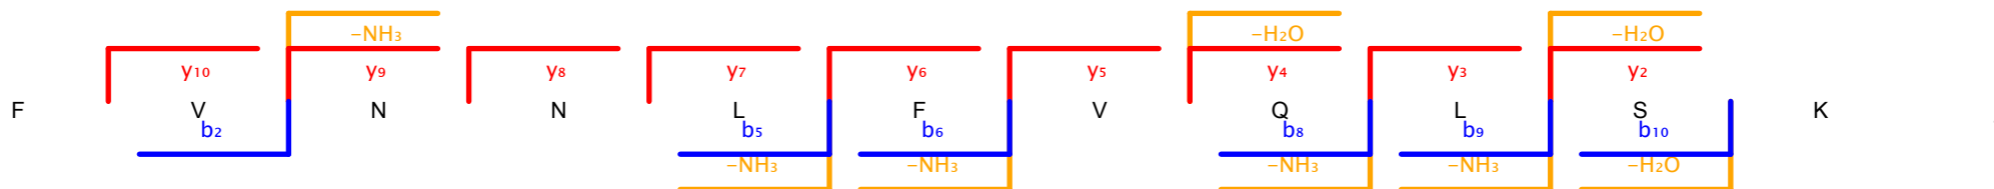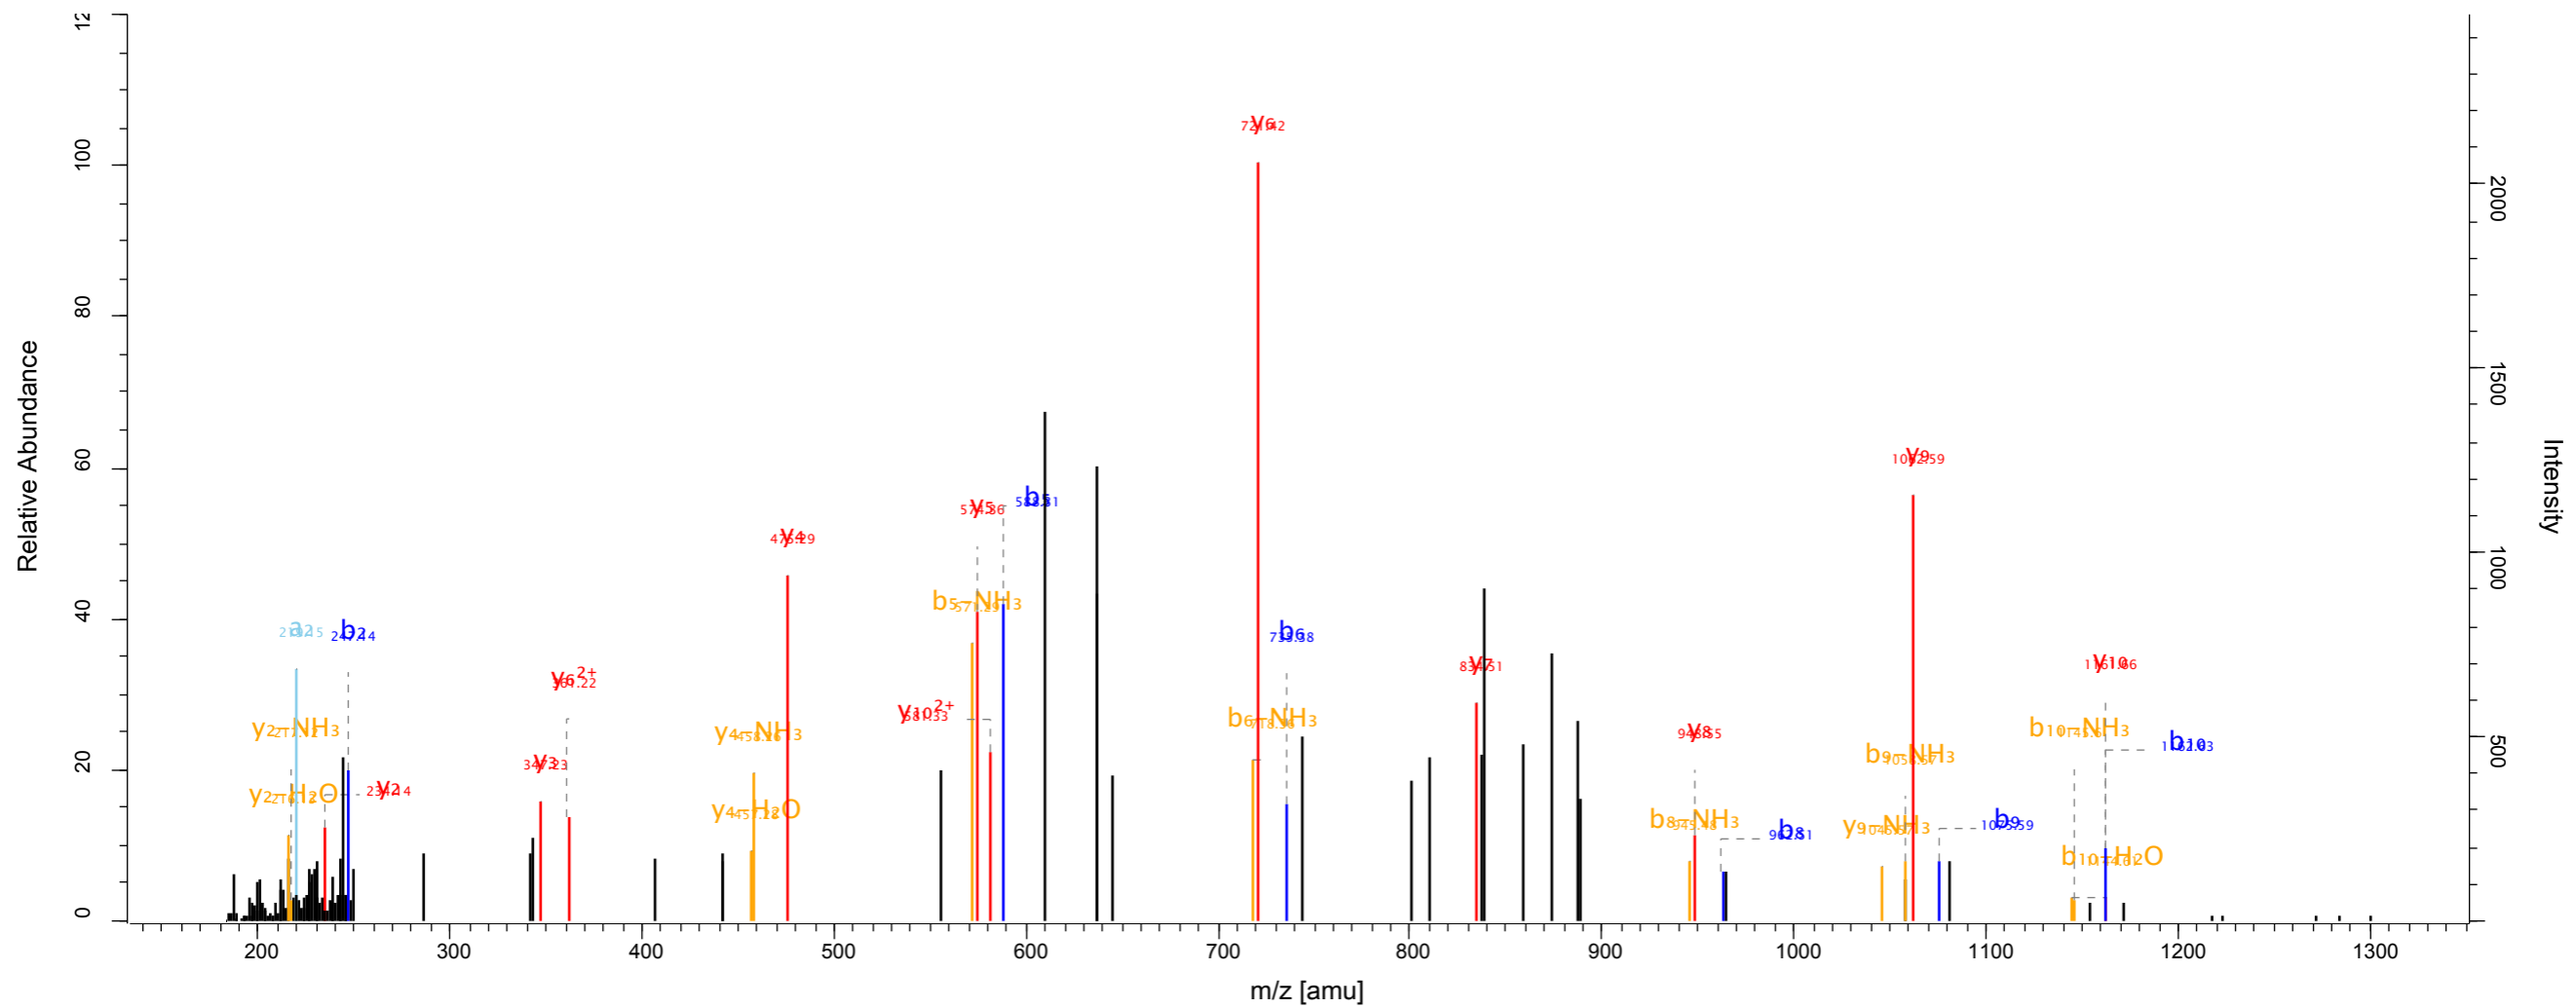

|             |           |          |                                      |
|-------------|-----------|----------|--------------------------------------|
| Scan number | 7302      | Raw file | SKaraca_LMB_H1_reverse_180811_6_rep1 |
| Method      | ITMS; CID | Pepti... | 143.01                               |

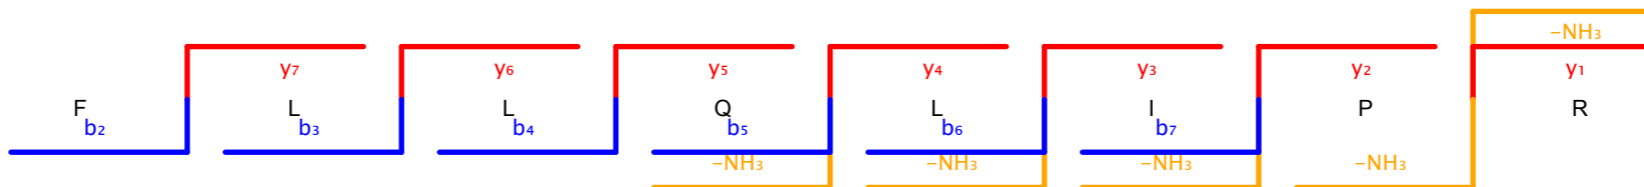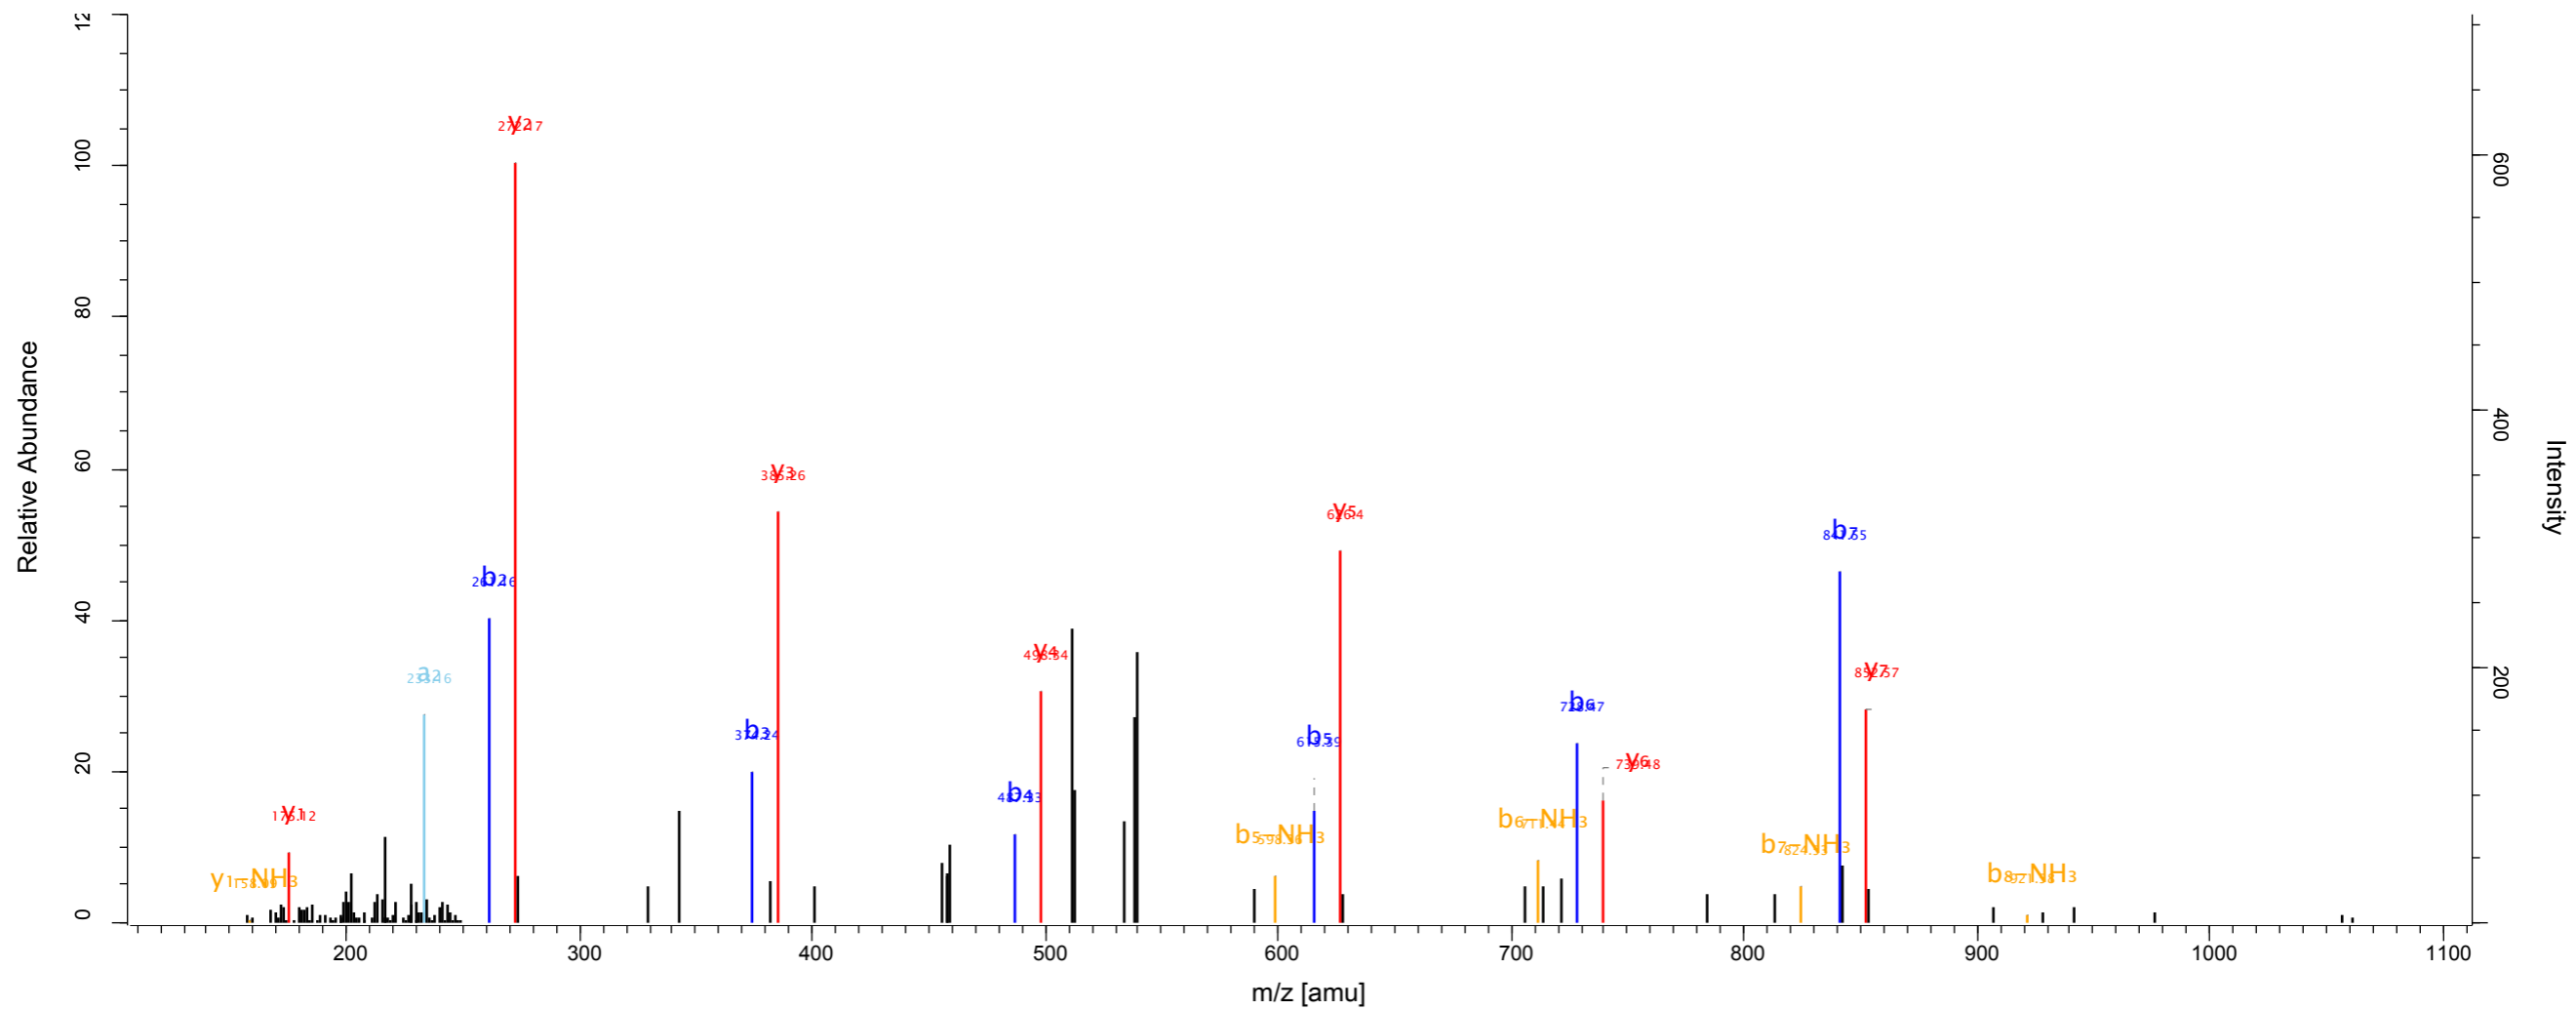

Scan number 7275 Raw file SKaraca\_LMB\_H1\_reverse\_180811\_7\_rep1  
 Method ITMS; CID Pepti... 142.43

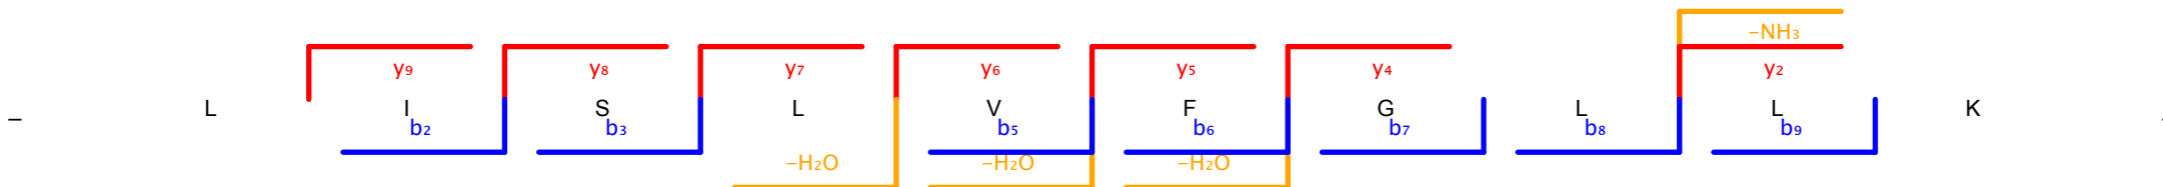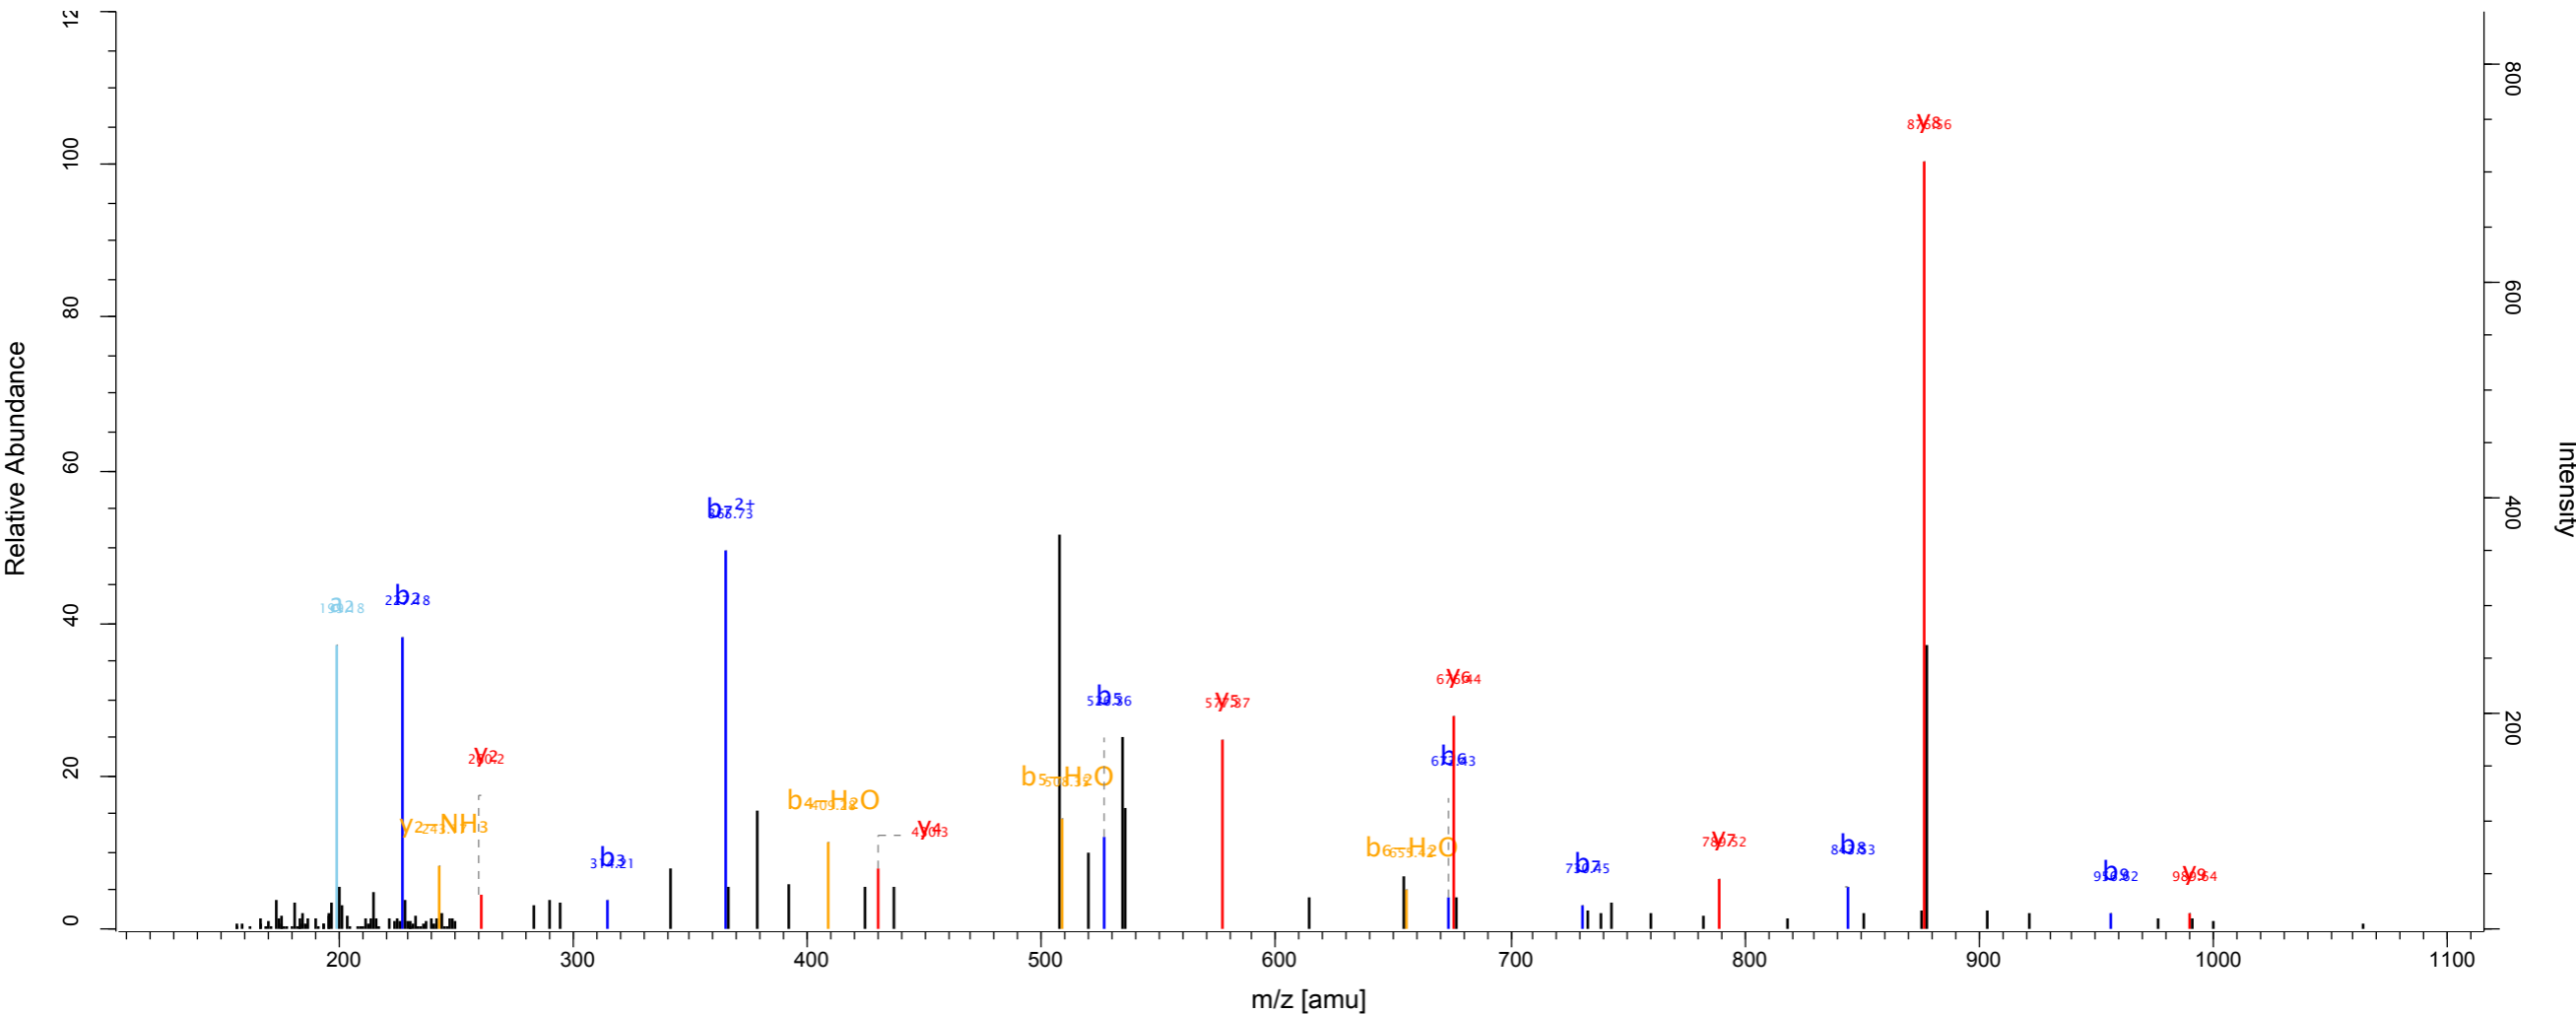



|             |           |          |                                      |
|-------------|-----------|----------|--------------------------------------|
| Scan number | 8064      | Raw file | SKaraca_LMB_H1_reverse_180811_9_rep1 |
| Method      | ITMS; CID | Pepti... | 92.26                                |

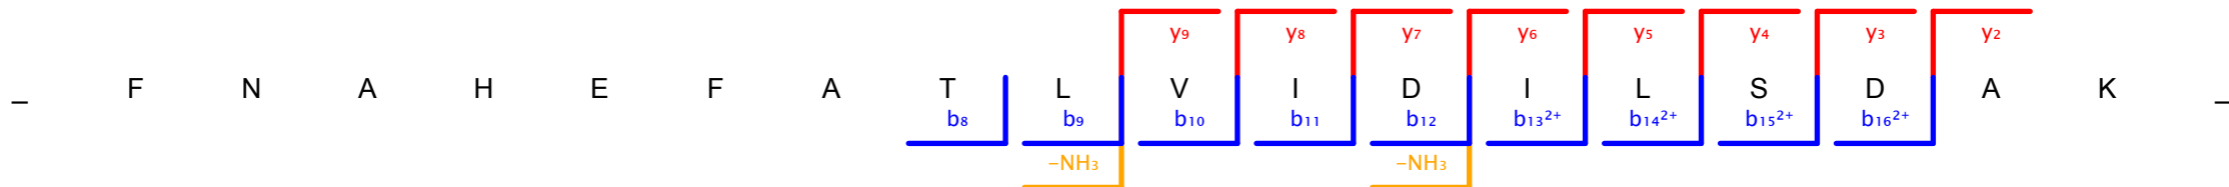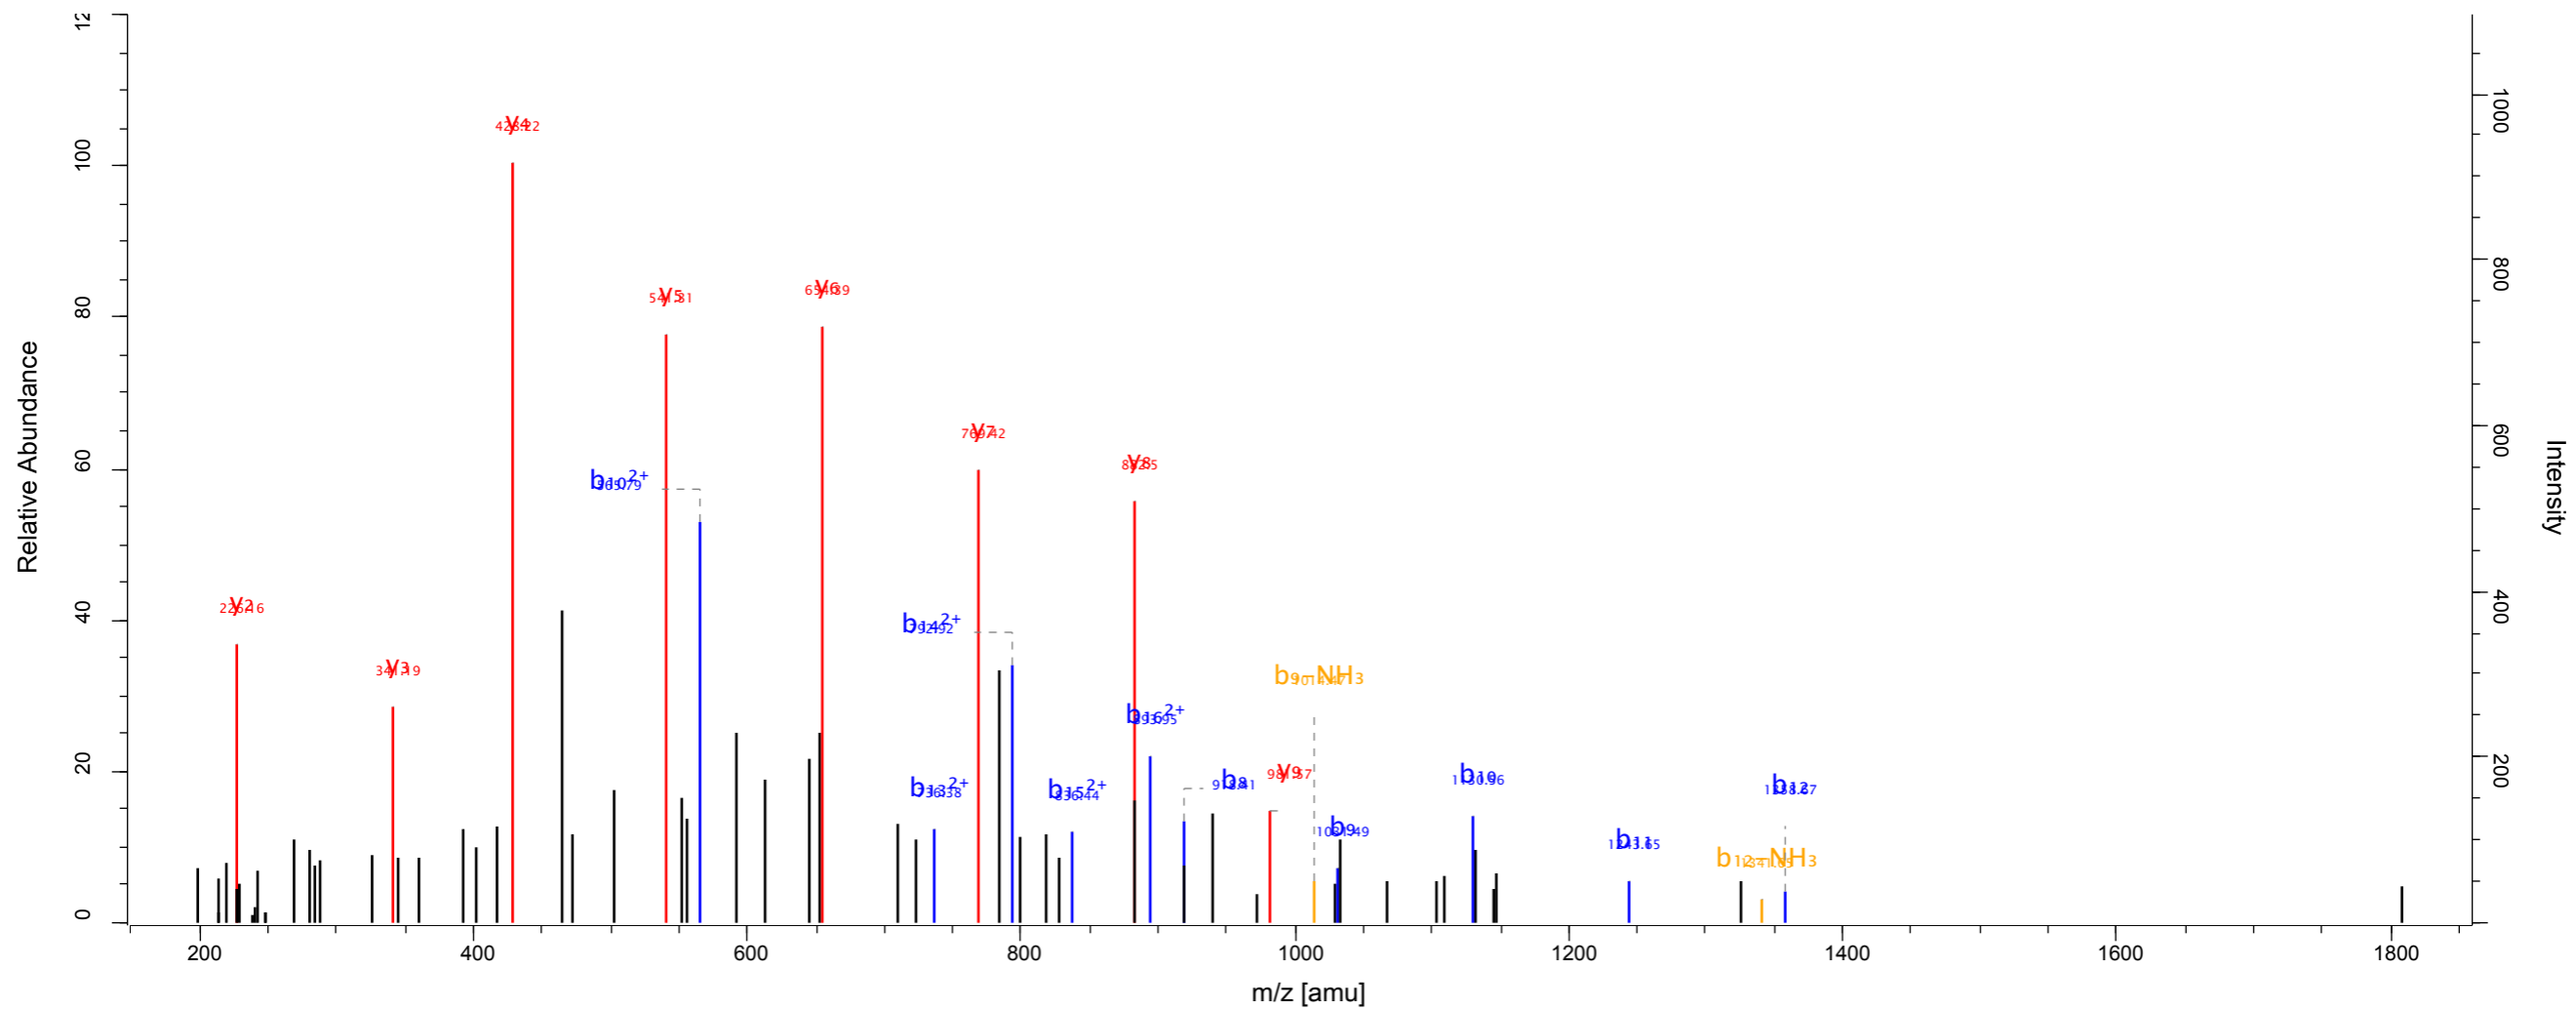

Scan number 7686 Raw file SKaraca\_LMB\_H1\_reverse\_180811\_9\_rep2  
 Method ITMS; CID Pepti... 143.17

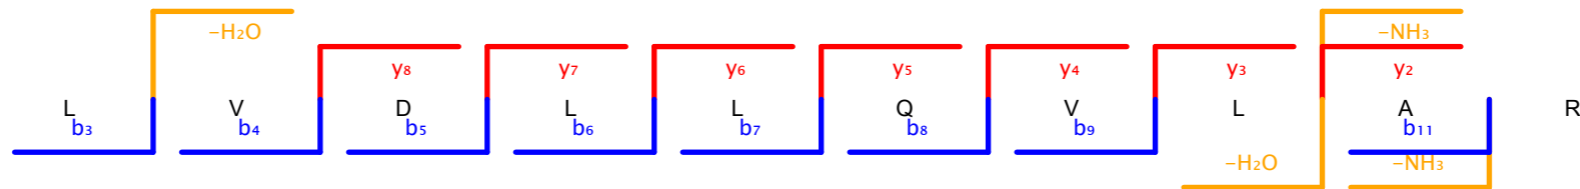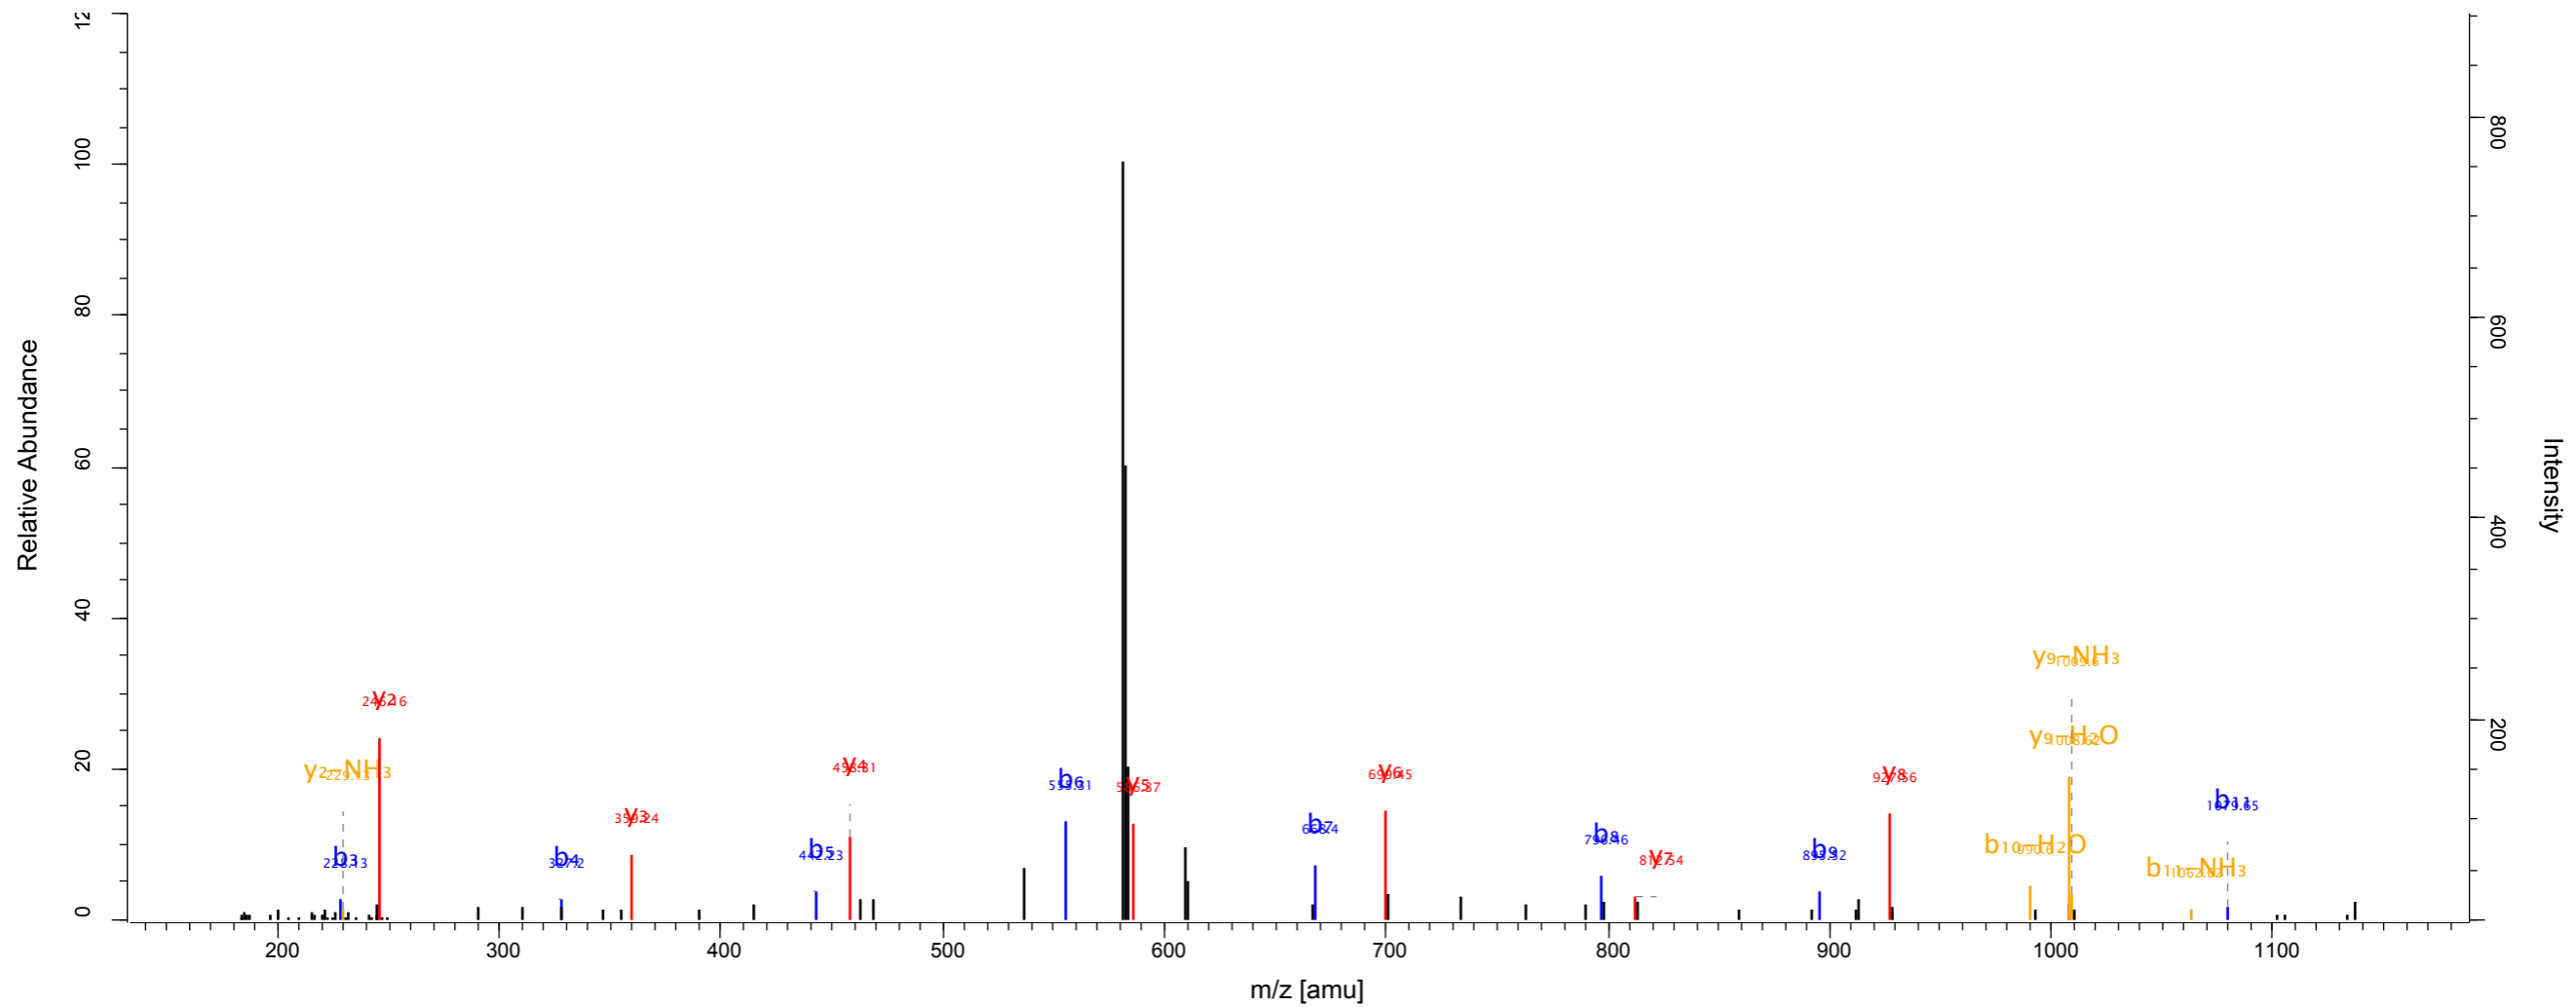

Scan number 6112 Raw file SKaraca\_LMB\_H3\_forward\_250811\_12\_rep2  
 Method ITMS; CID Pepti... 119.08

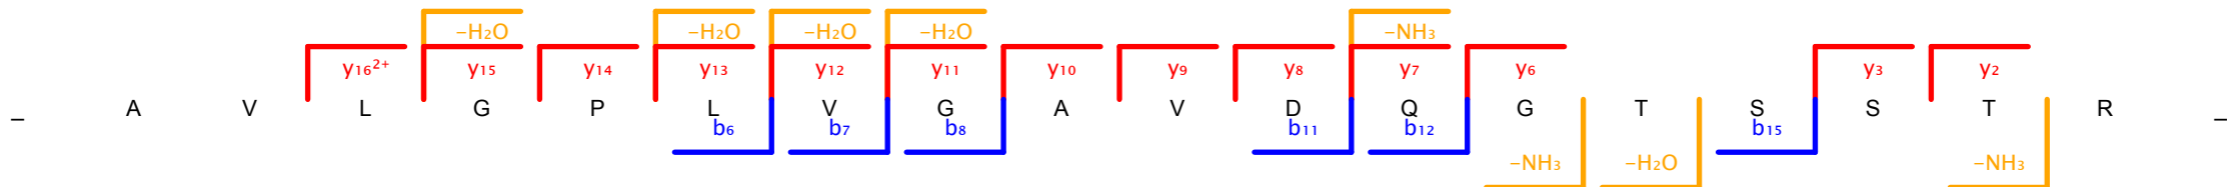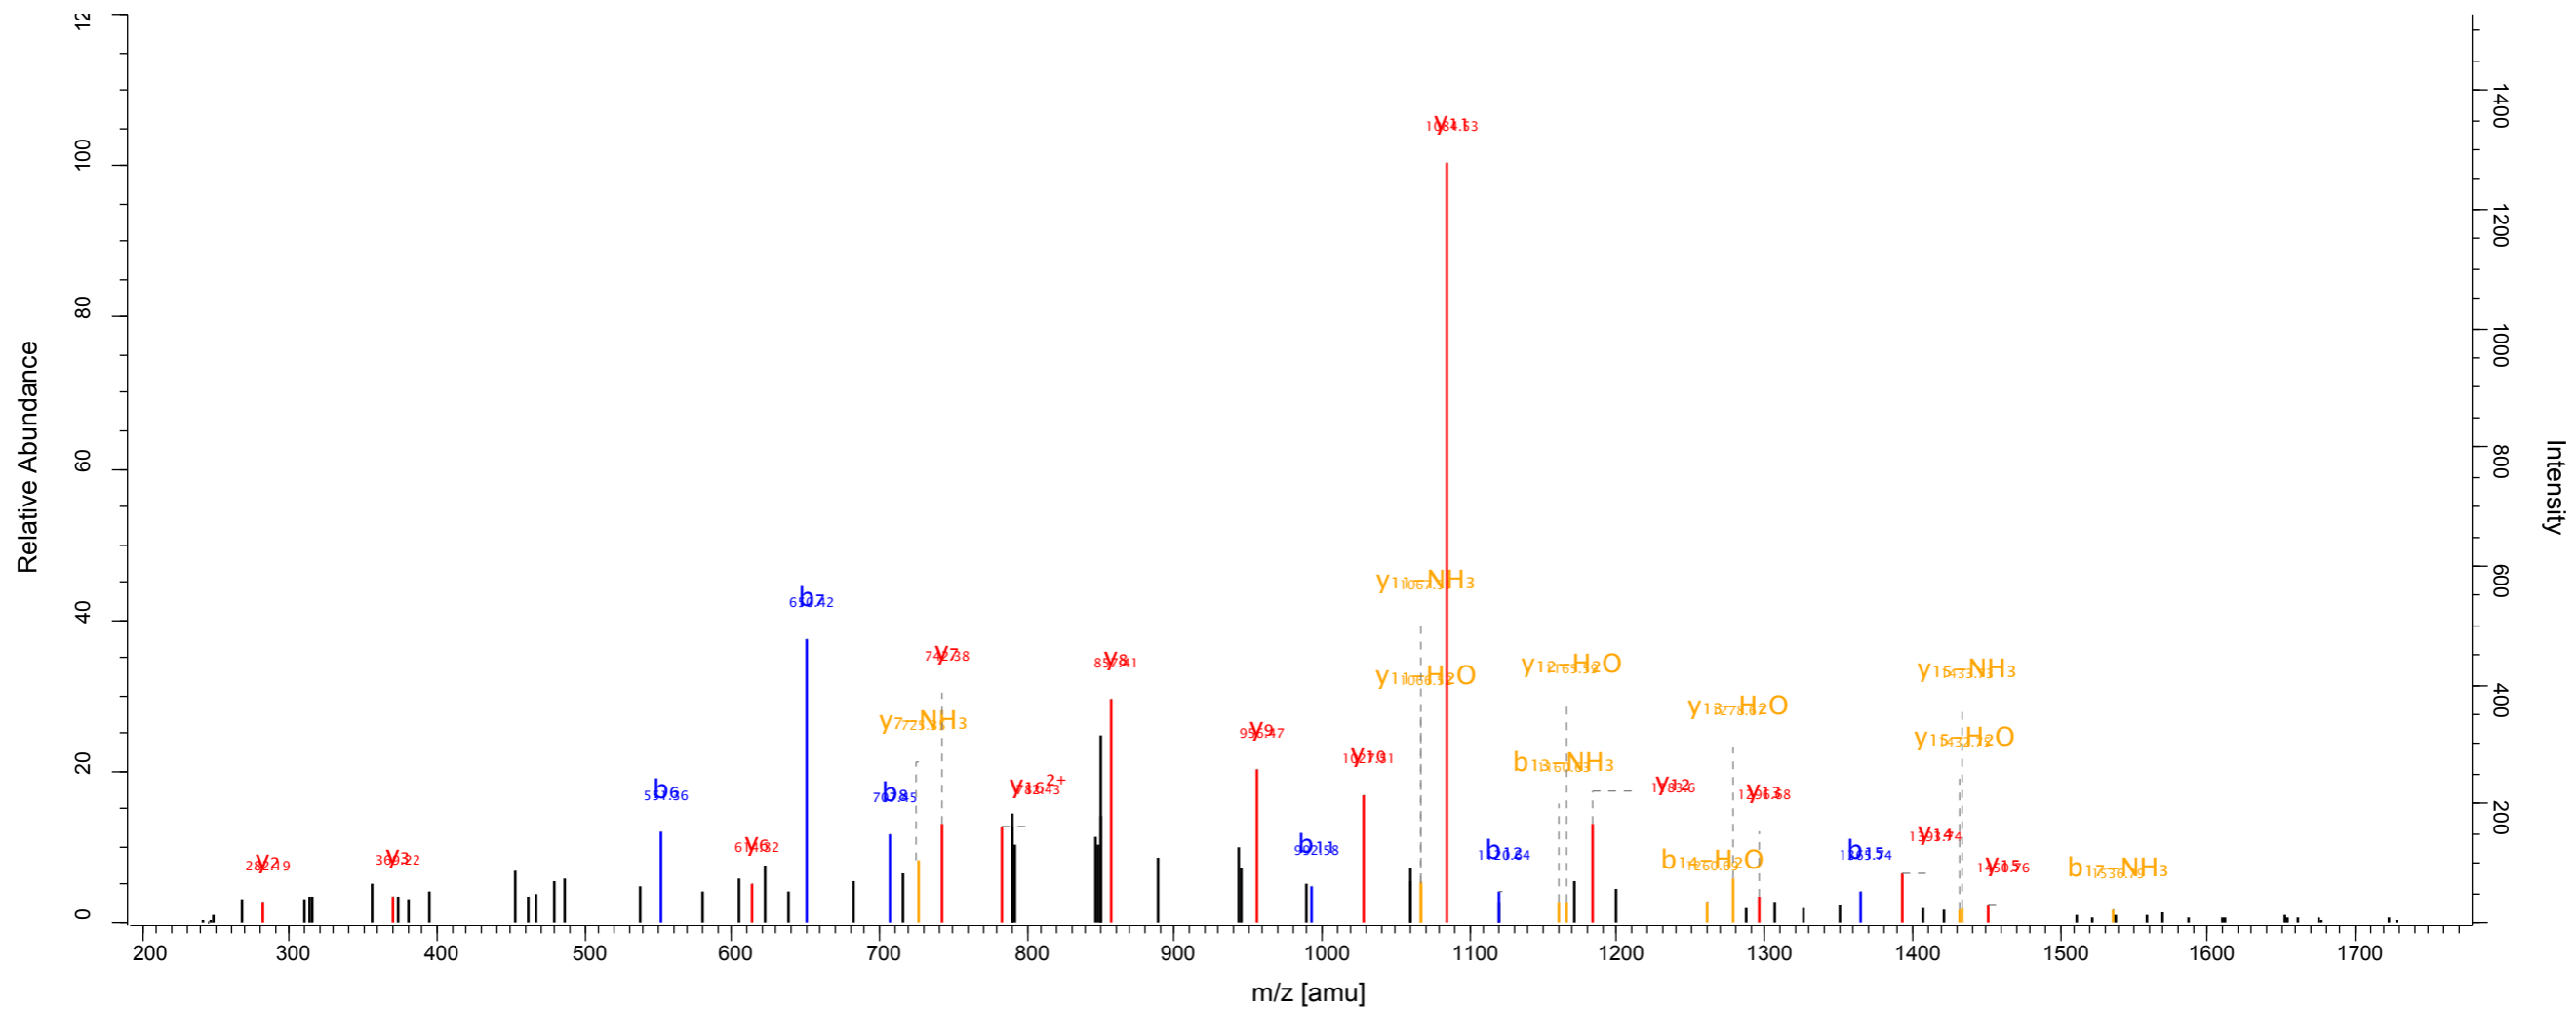

Scan number 1102 Raw file SKaraca\_LMB\_H3\_forward\_250811\_13\_rep2  
 Method ITMS; CID Pepti... 79.39

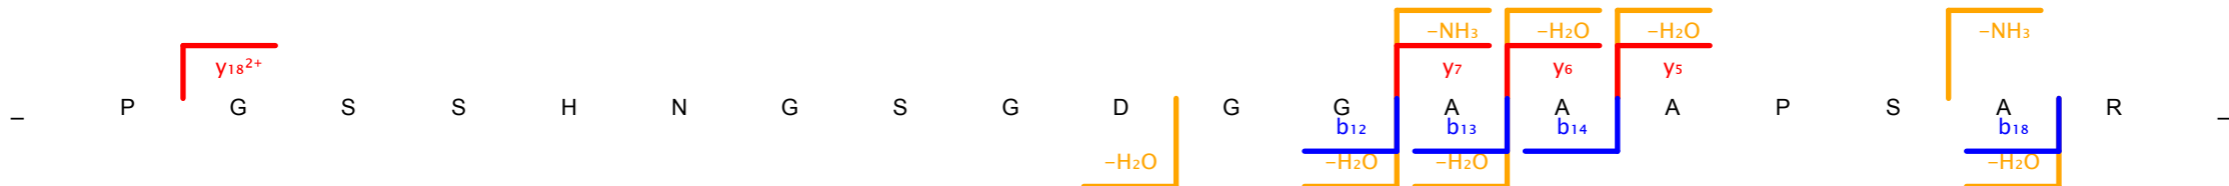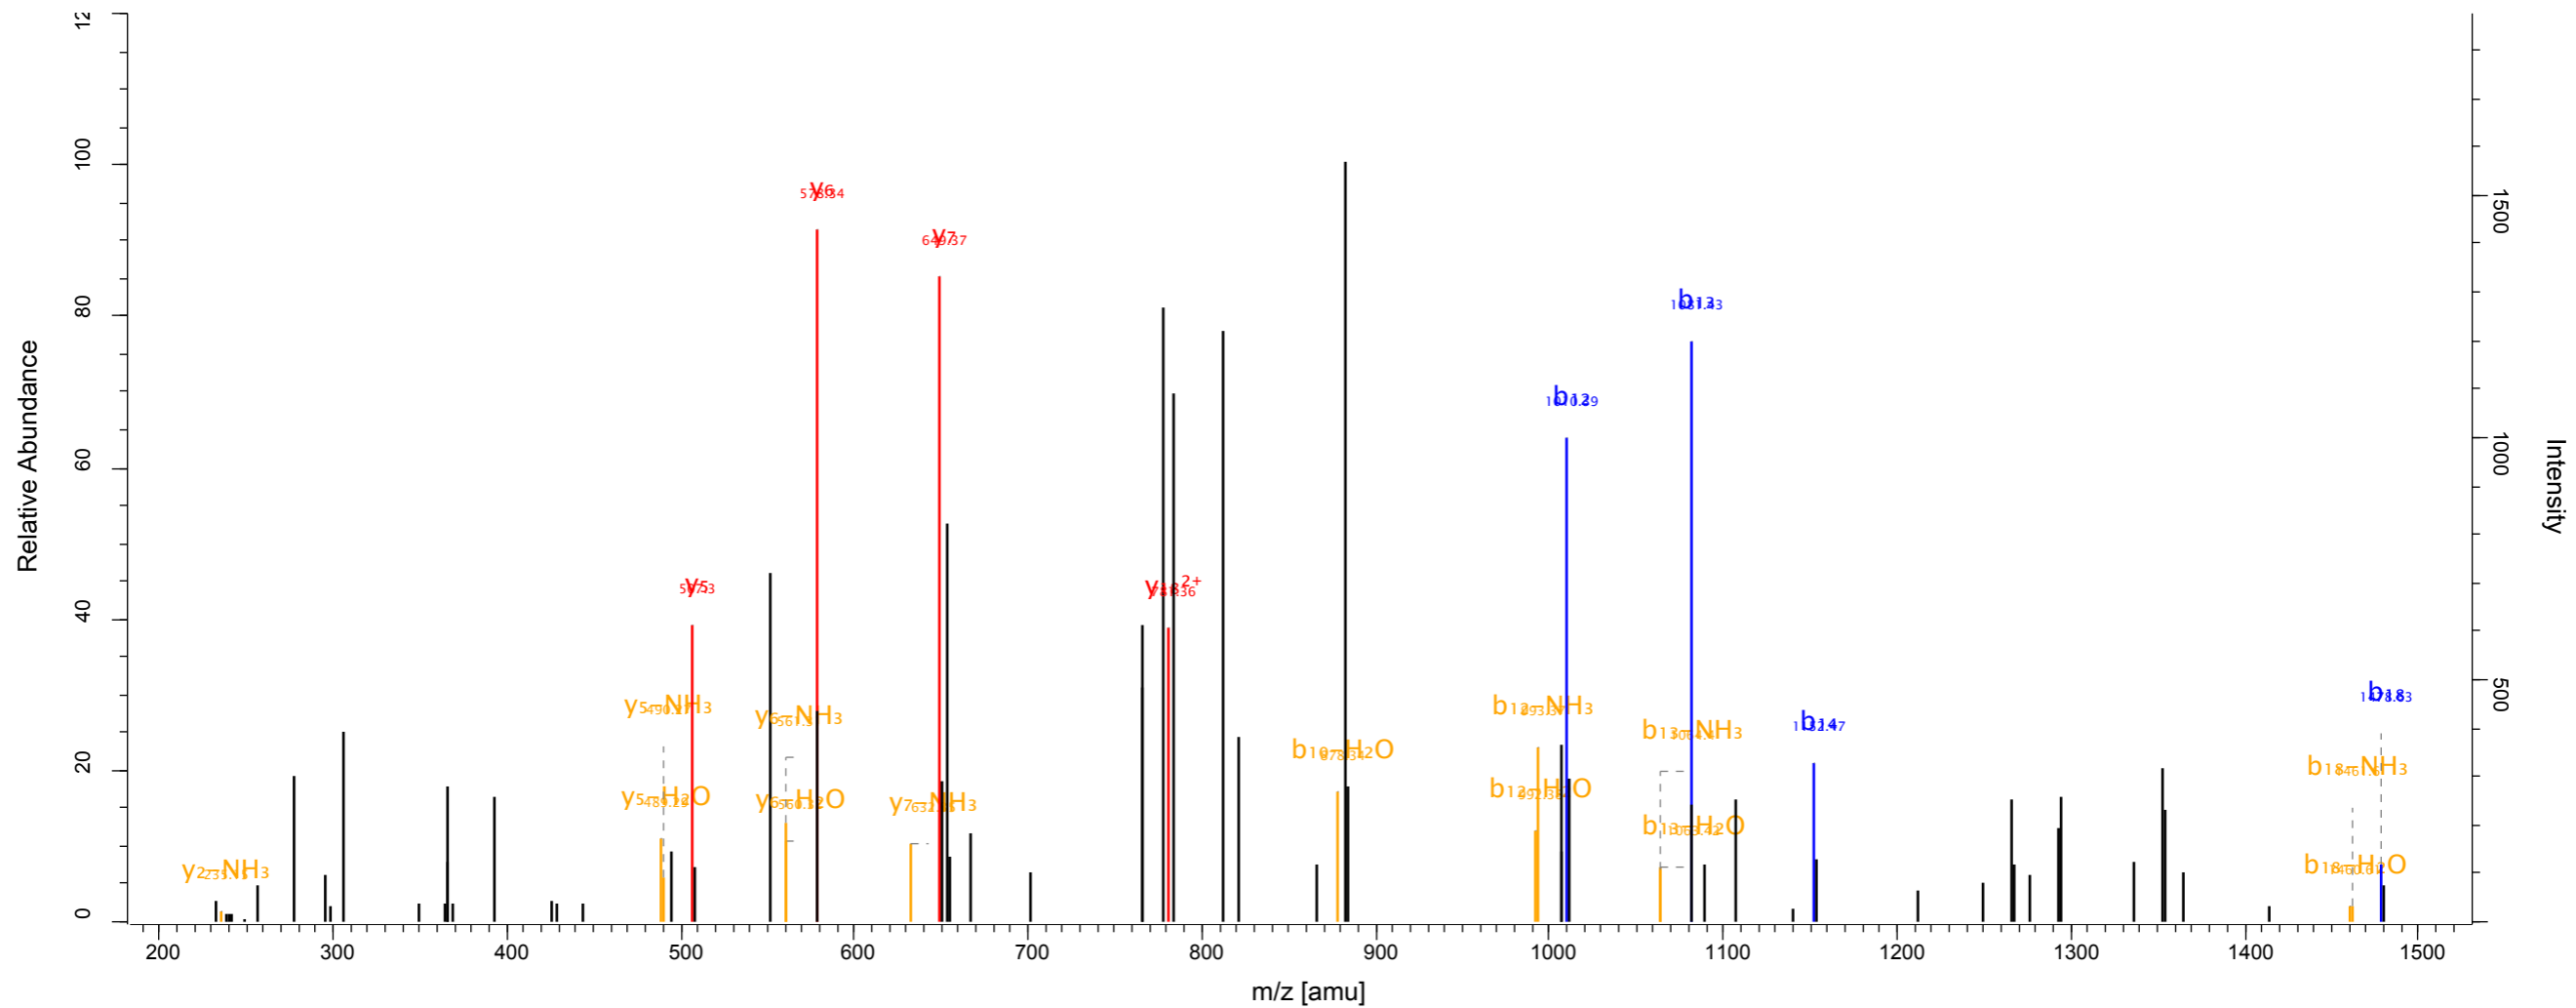

Scan number 7979 Raw file SKaraca\_LMB\_H3\_forward\_250811\_15\_rep2  
 Method ITMS; CID Pepti... 158.93

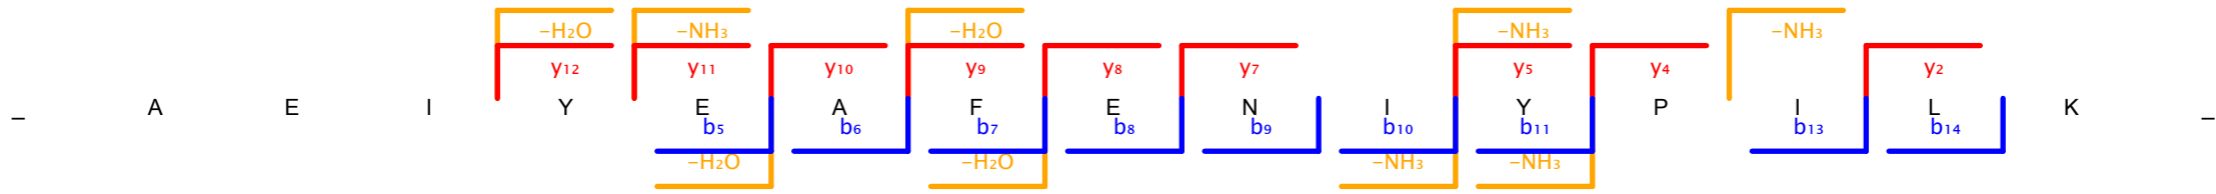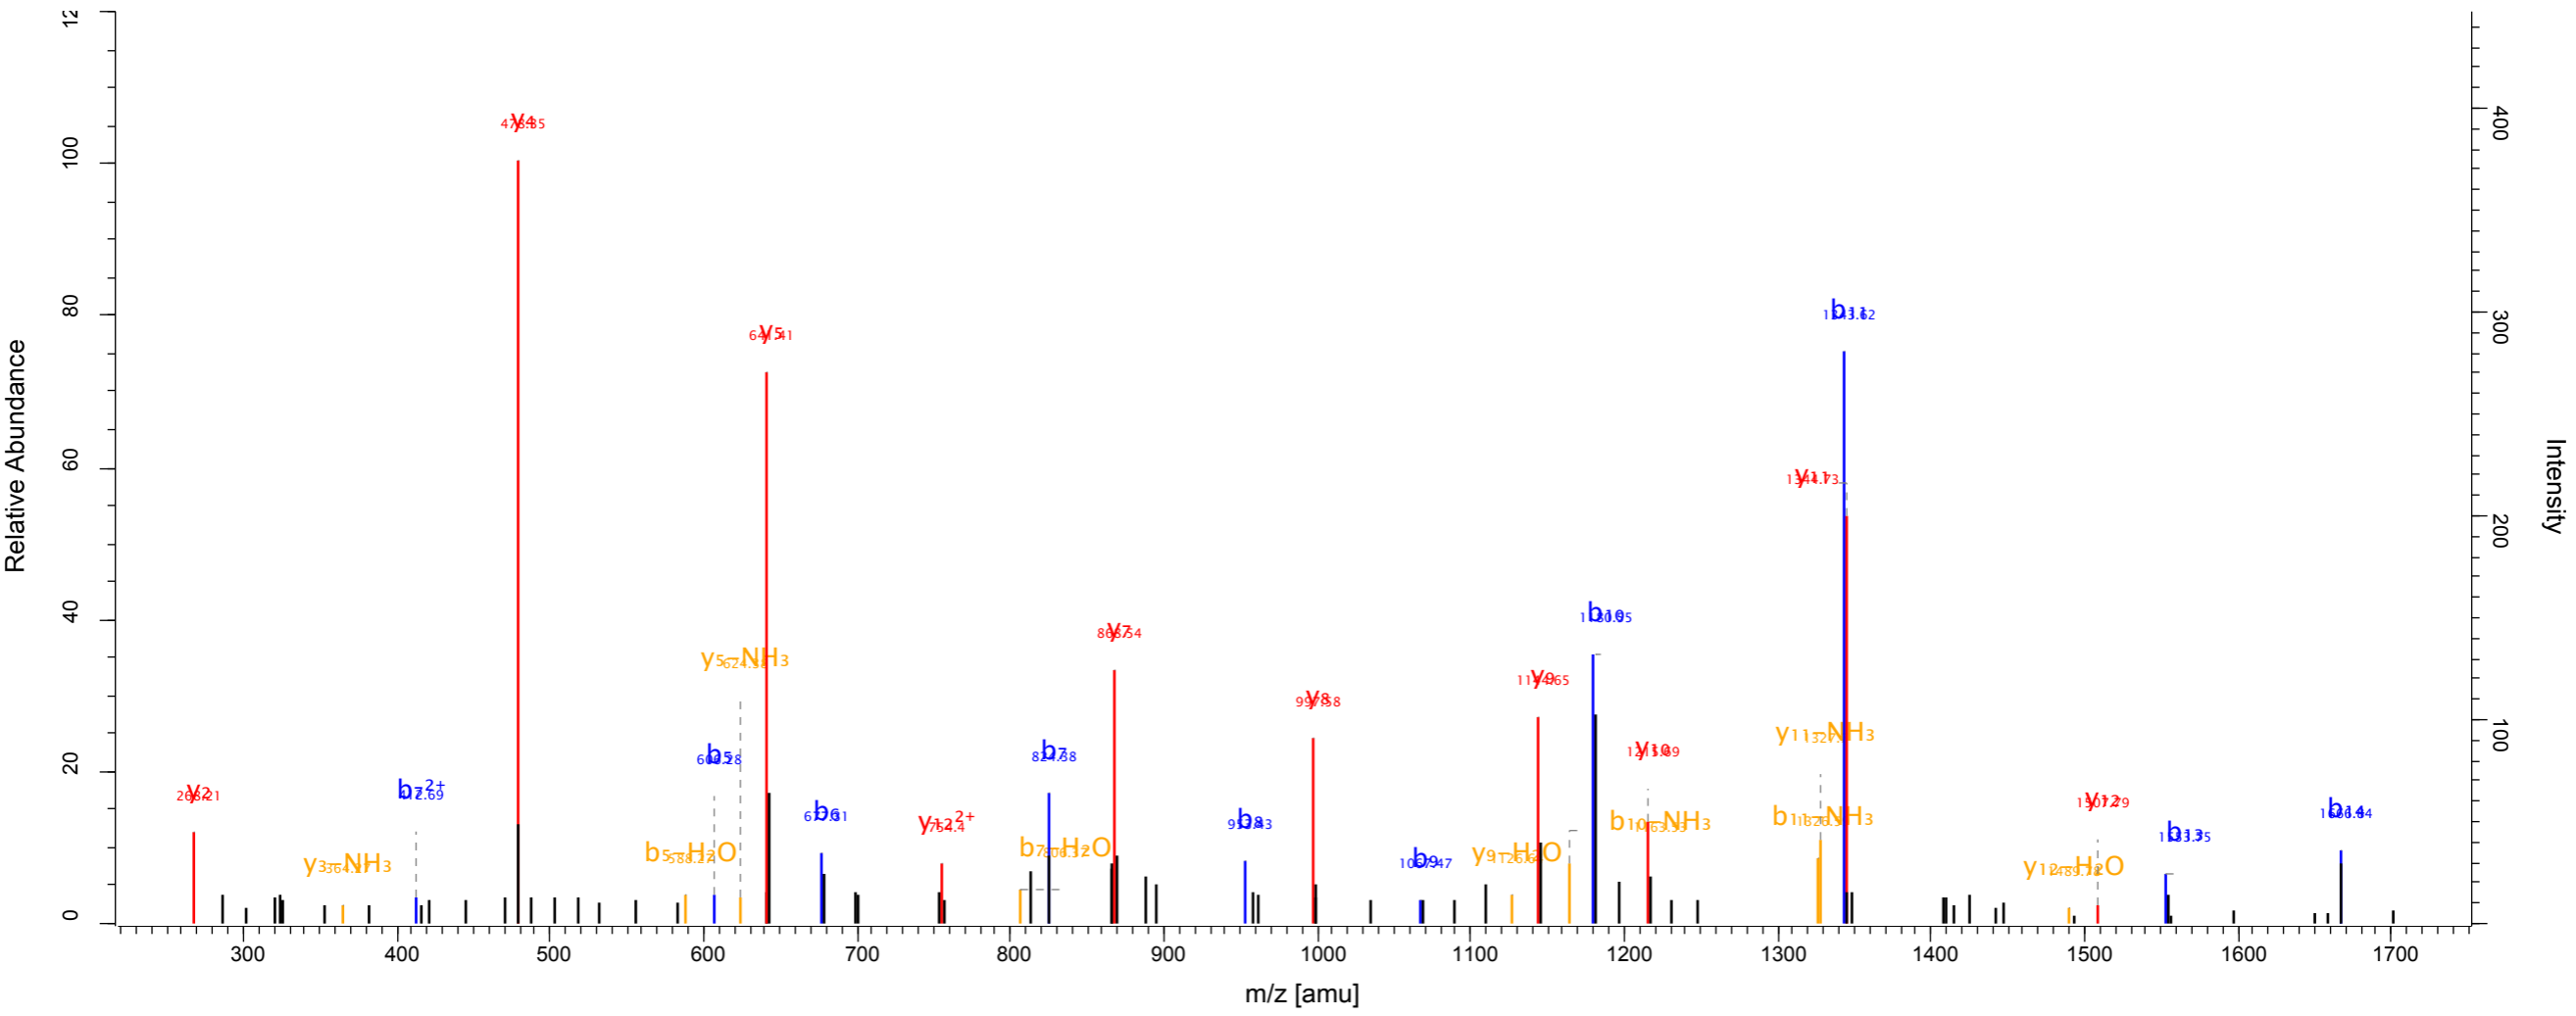

Scan number 8362 Raw file SKaraca\_LMB\_H3\_forward\_250811\_17\_rep2  
 Method ITMS; CID Pepti... 191.53

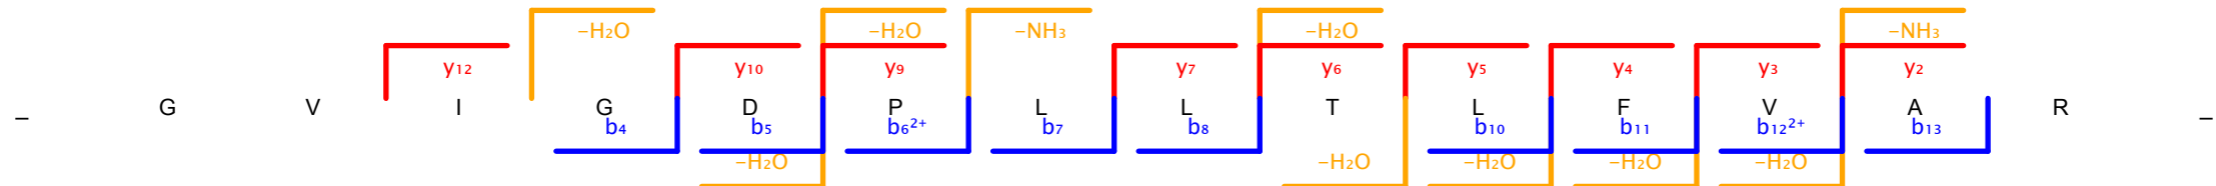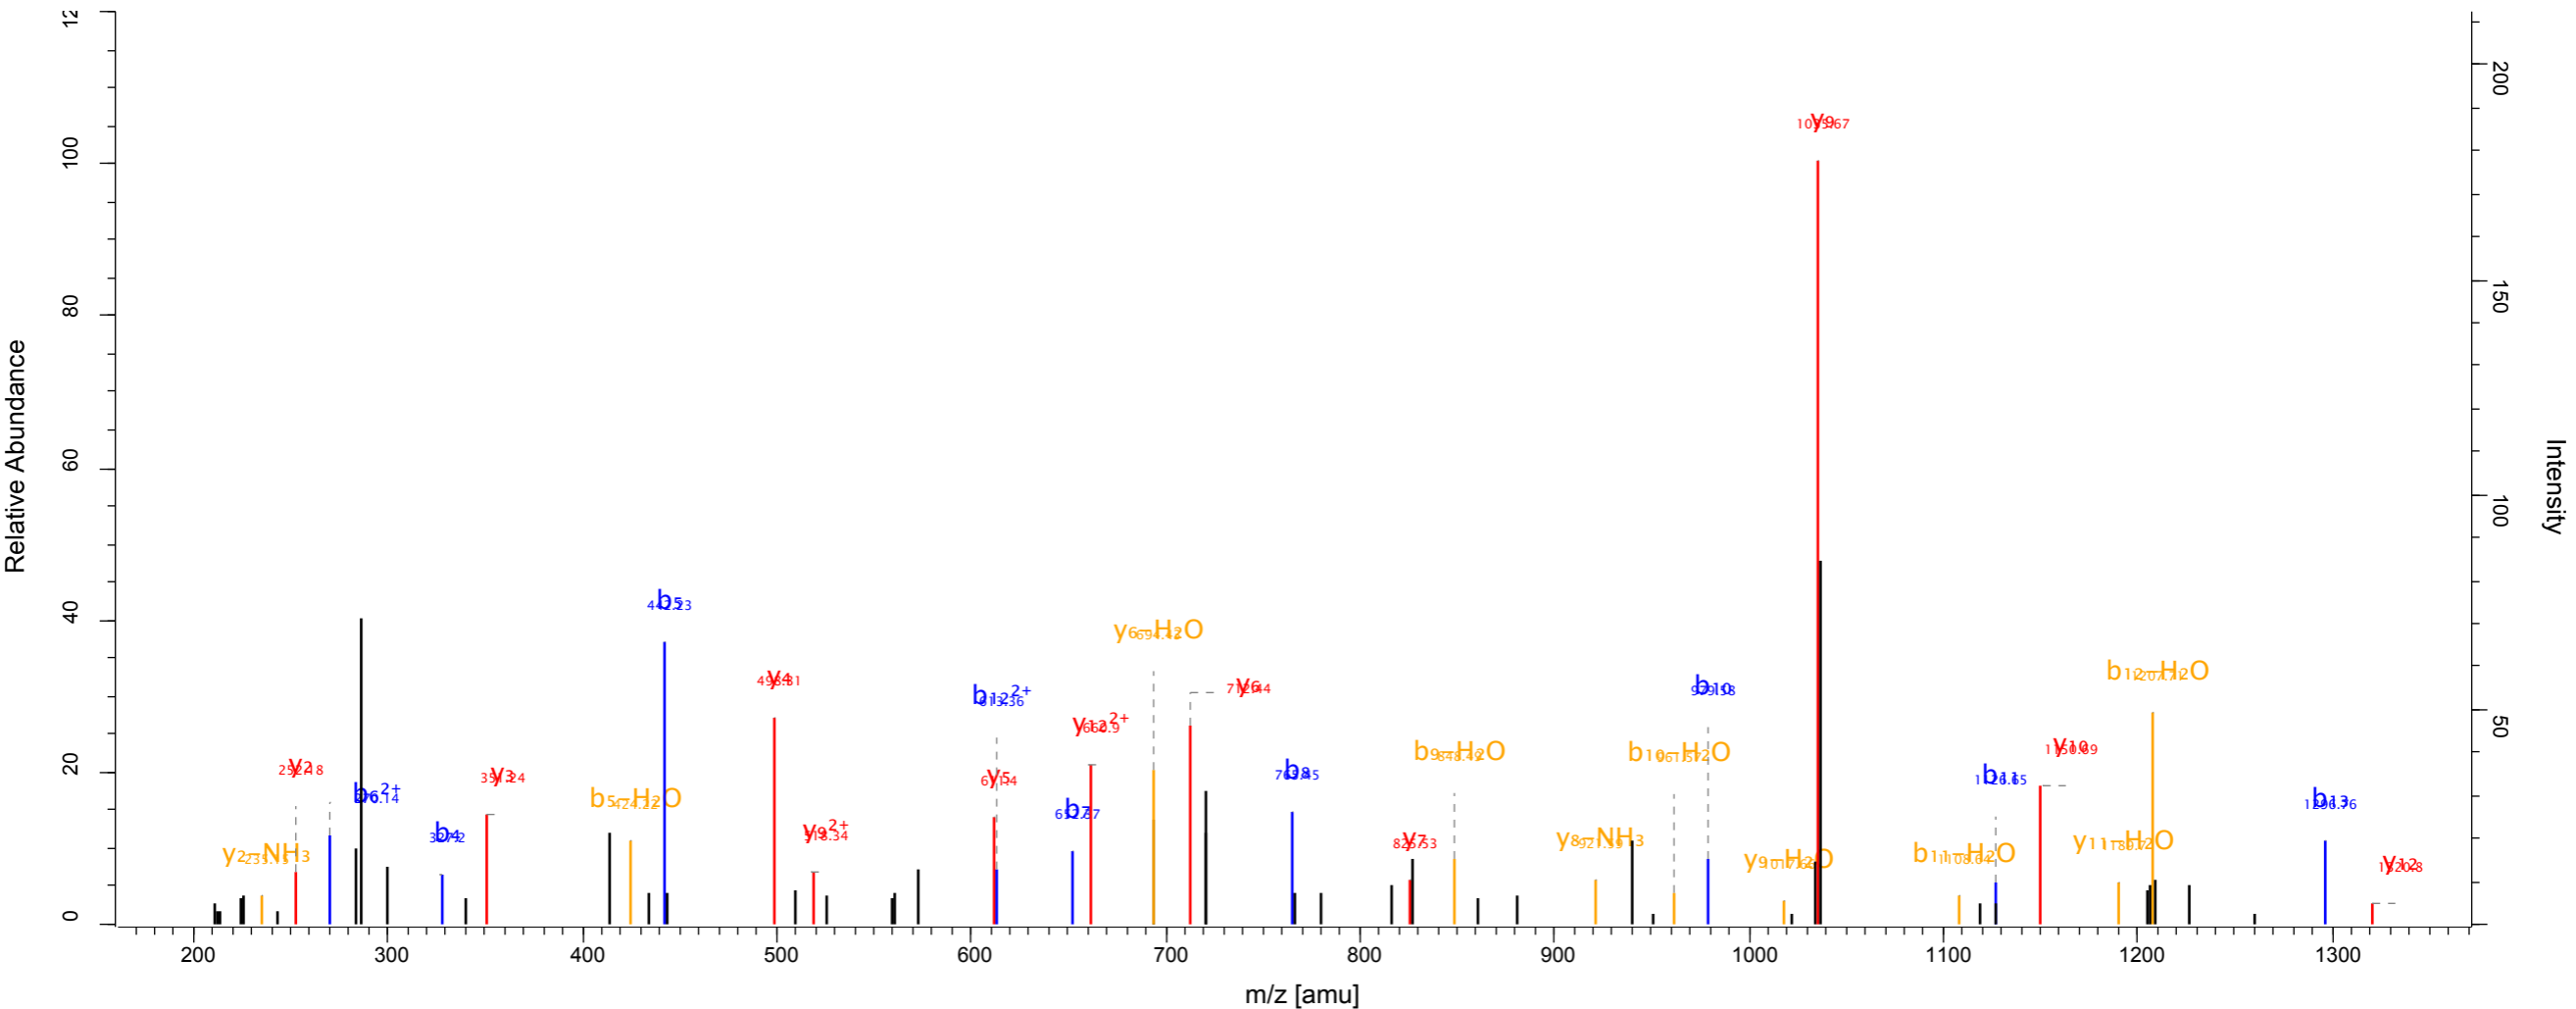

Scan number 8405 Raw file SKaraca\_LMB\_H3\_forward\_250811\_17\_rep3  
 Method ITMS; CID Pepti... 121.28

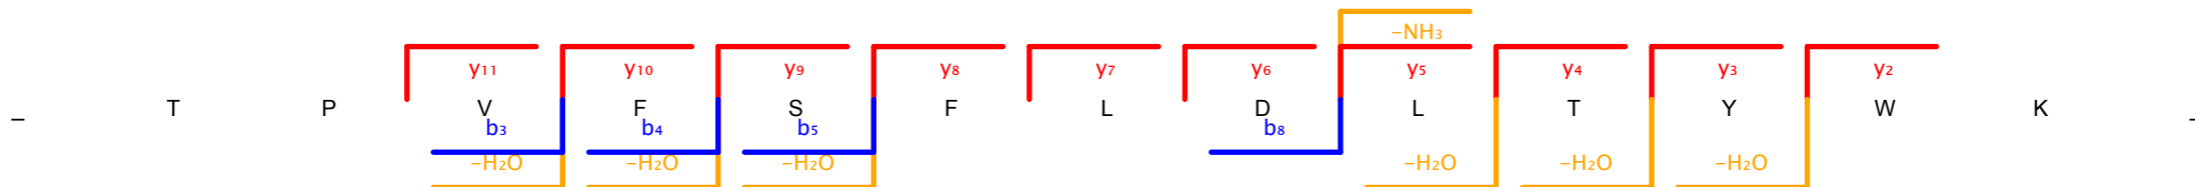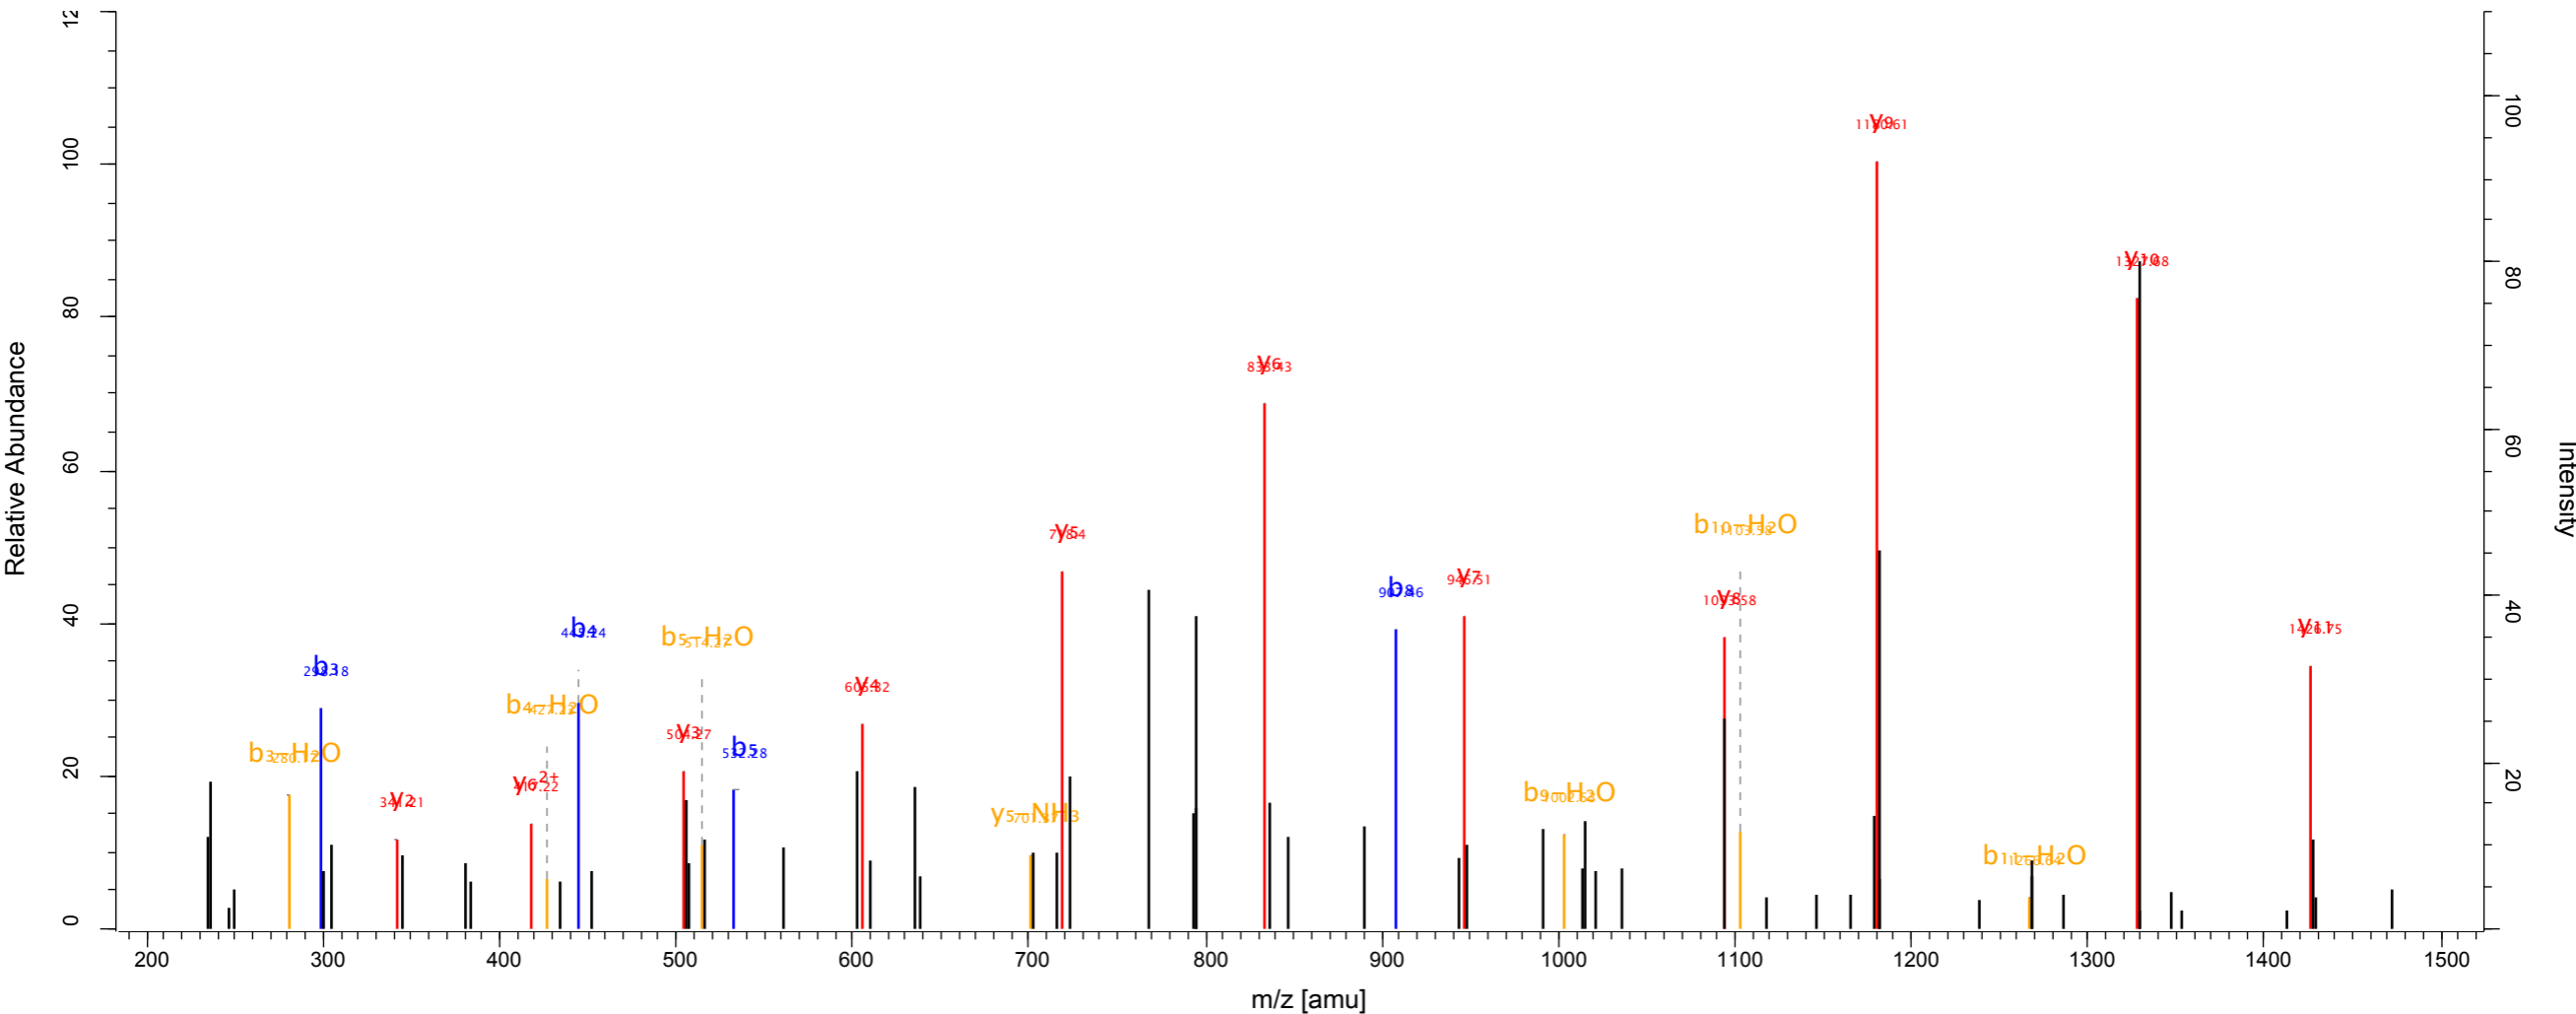

Scan number 6682 Raw file SKaraca\_LMB\_H3\_forward\_250811\_20\_rep3  
 Method ITMS; CID Pepti... 214.26

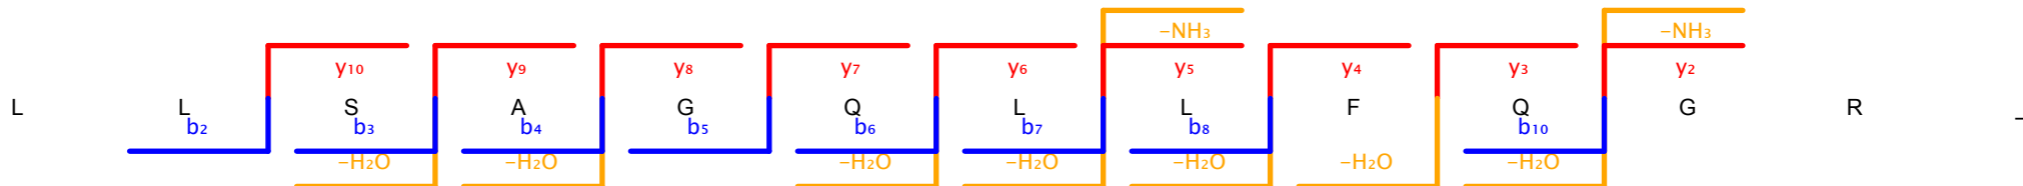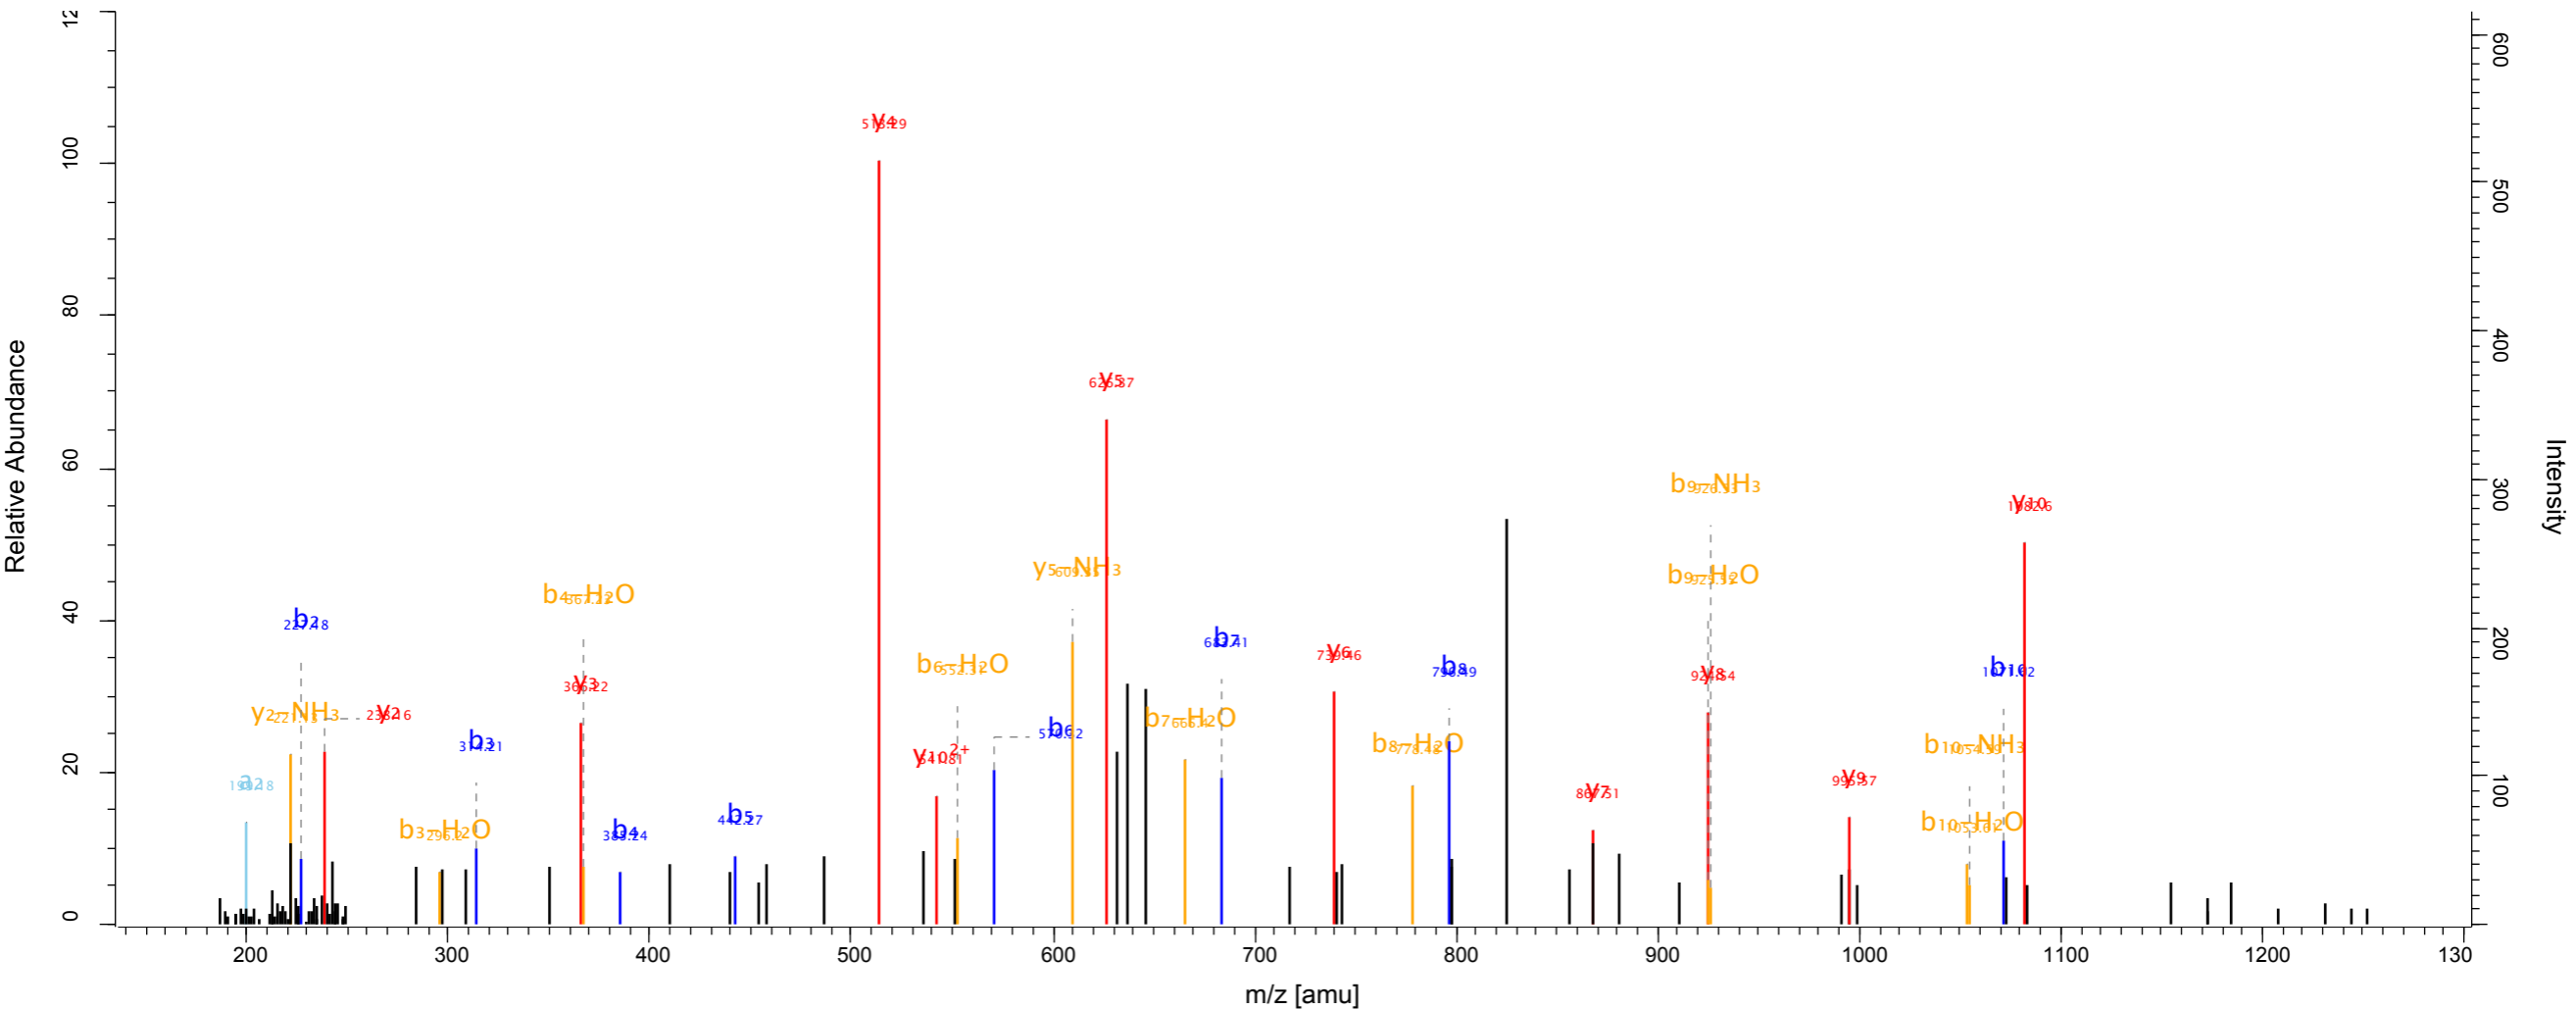



Scan number 6167 Raw file SKaraca\_LMB\_H3\_rev\_280811\_11\_rep3  
 Method ITMS; CID Pepti... 101.89

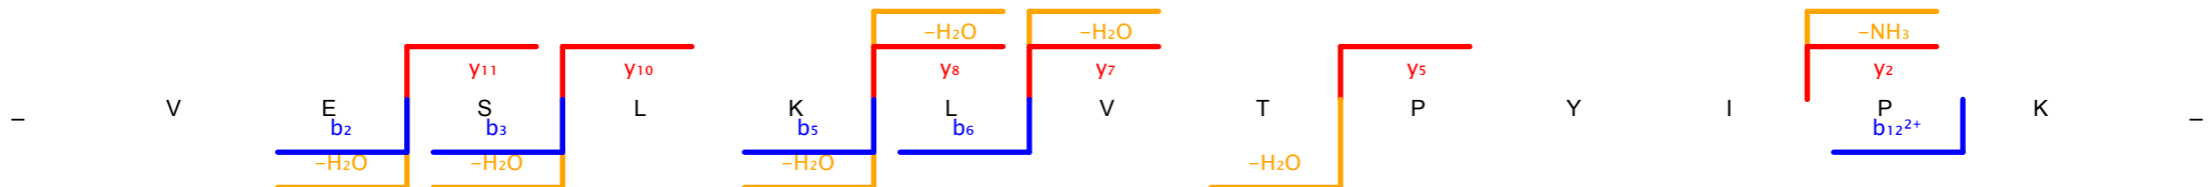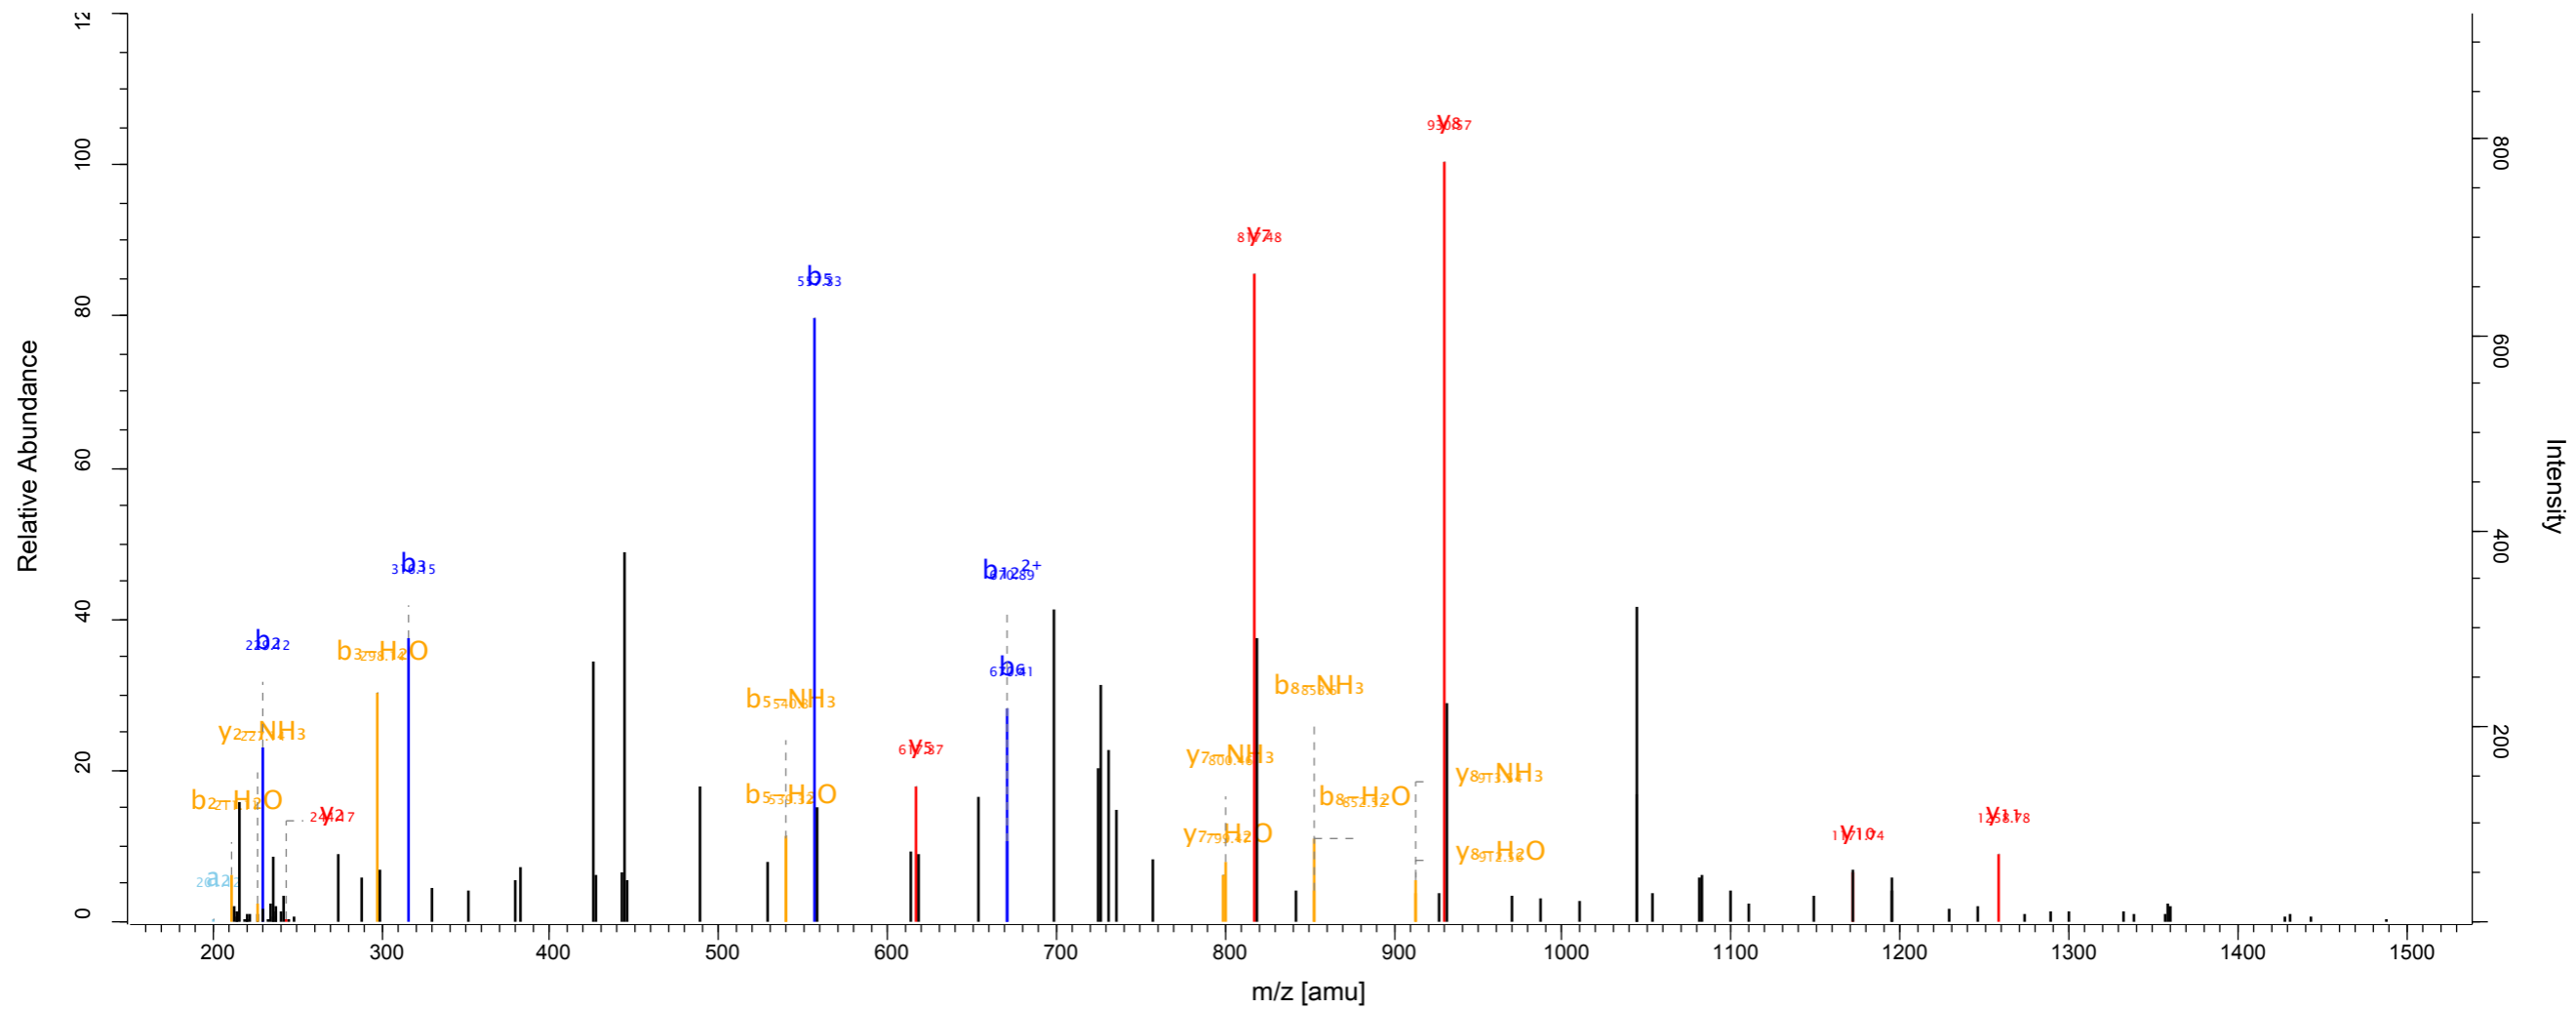

|             |           |          |                                   |
|-------------|-----------|----------|-----------------------------------|
| Scan number | 7484      | Raw file | SKaraca_LMB_H3_rev_280811_12_rep3 |
| Method      | ITMS; CID | Pepti... | 126.67                            |

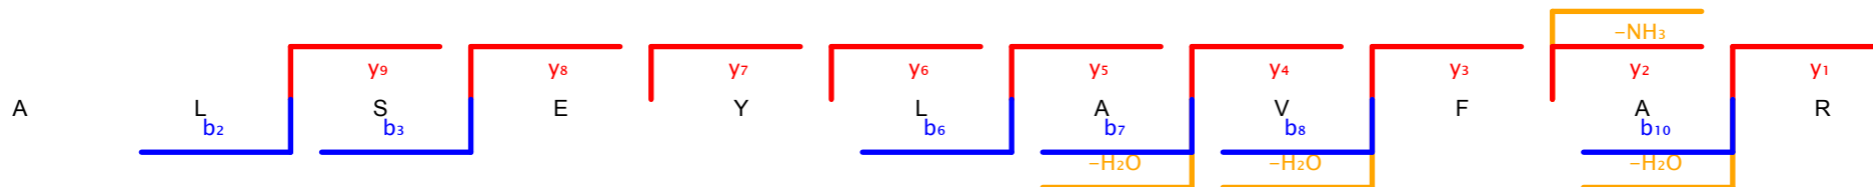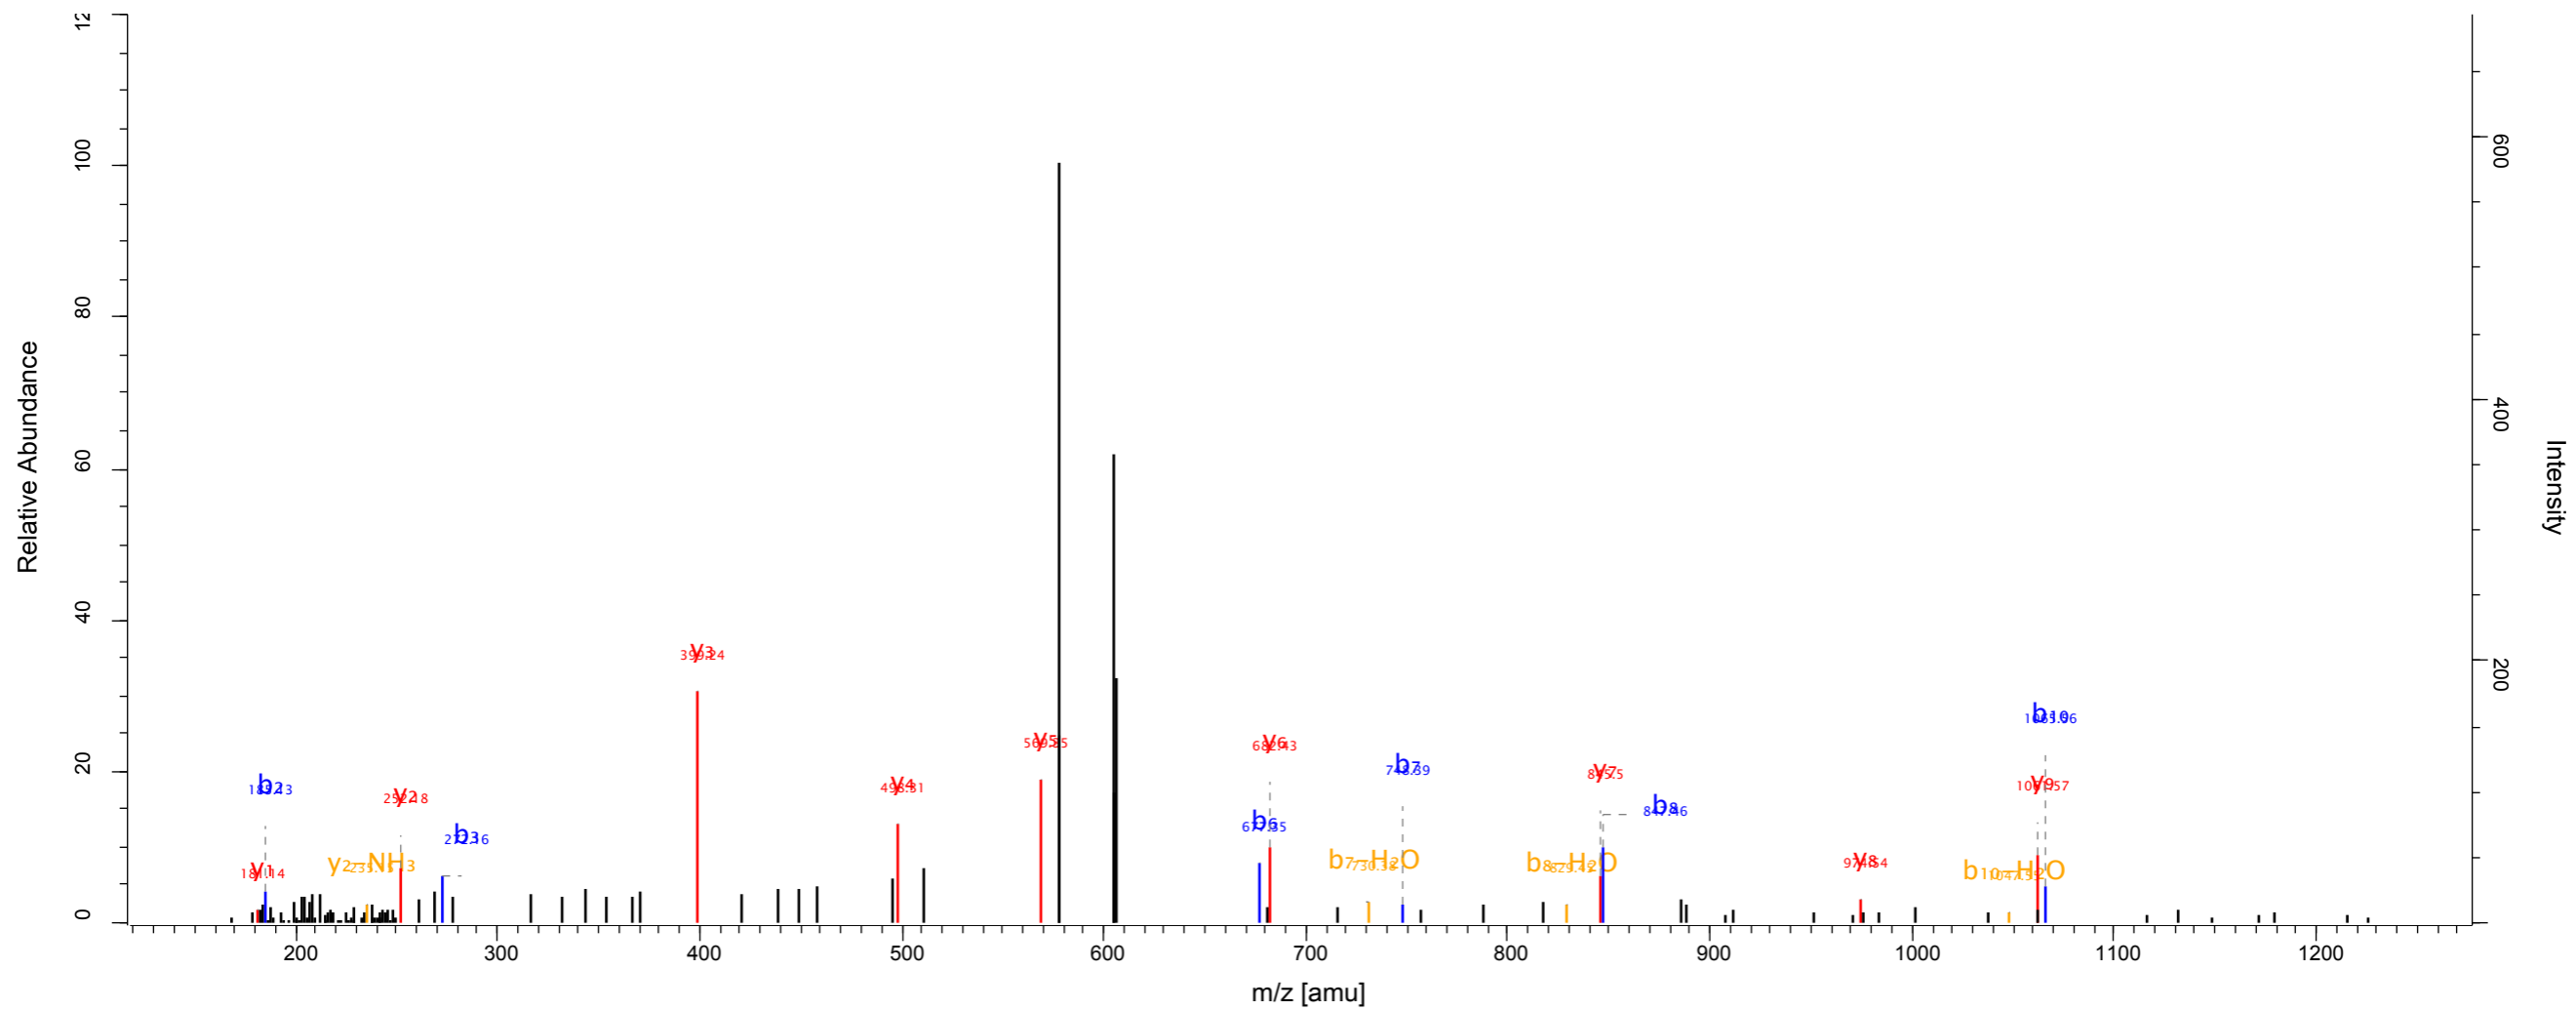

Scan number 4149 Raw file SKaraca\_LMB\_H3\_rev\_280811\_13\_rep2  
 Method ITMS; CID Pepti... 131.82

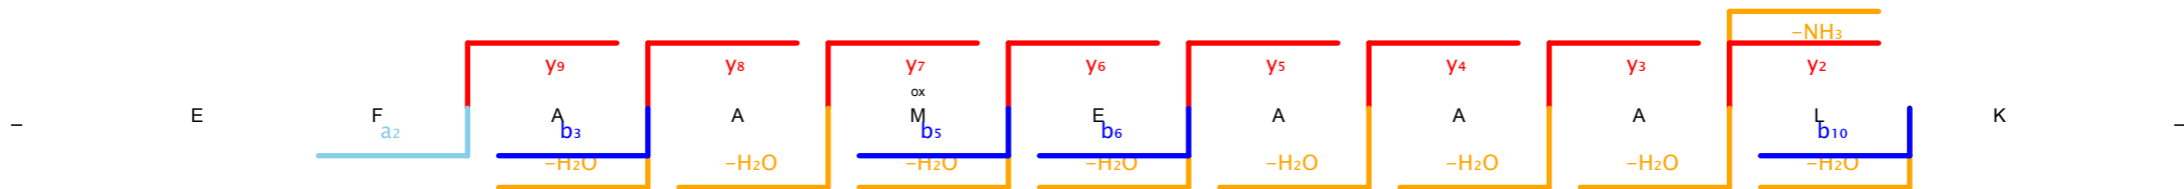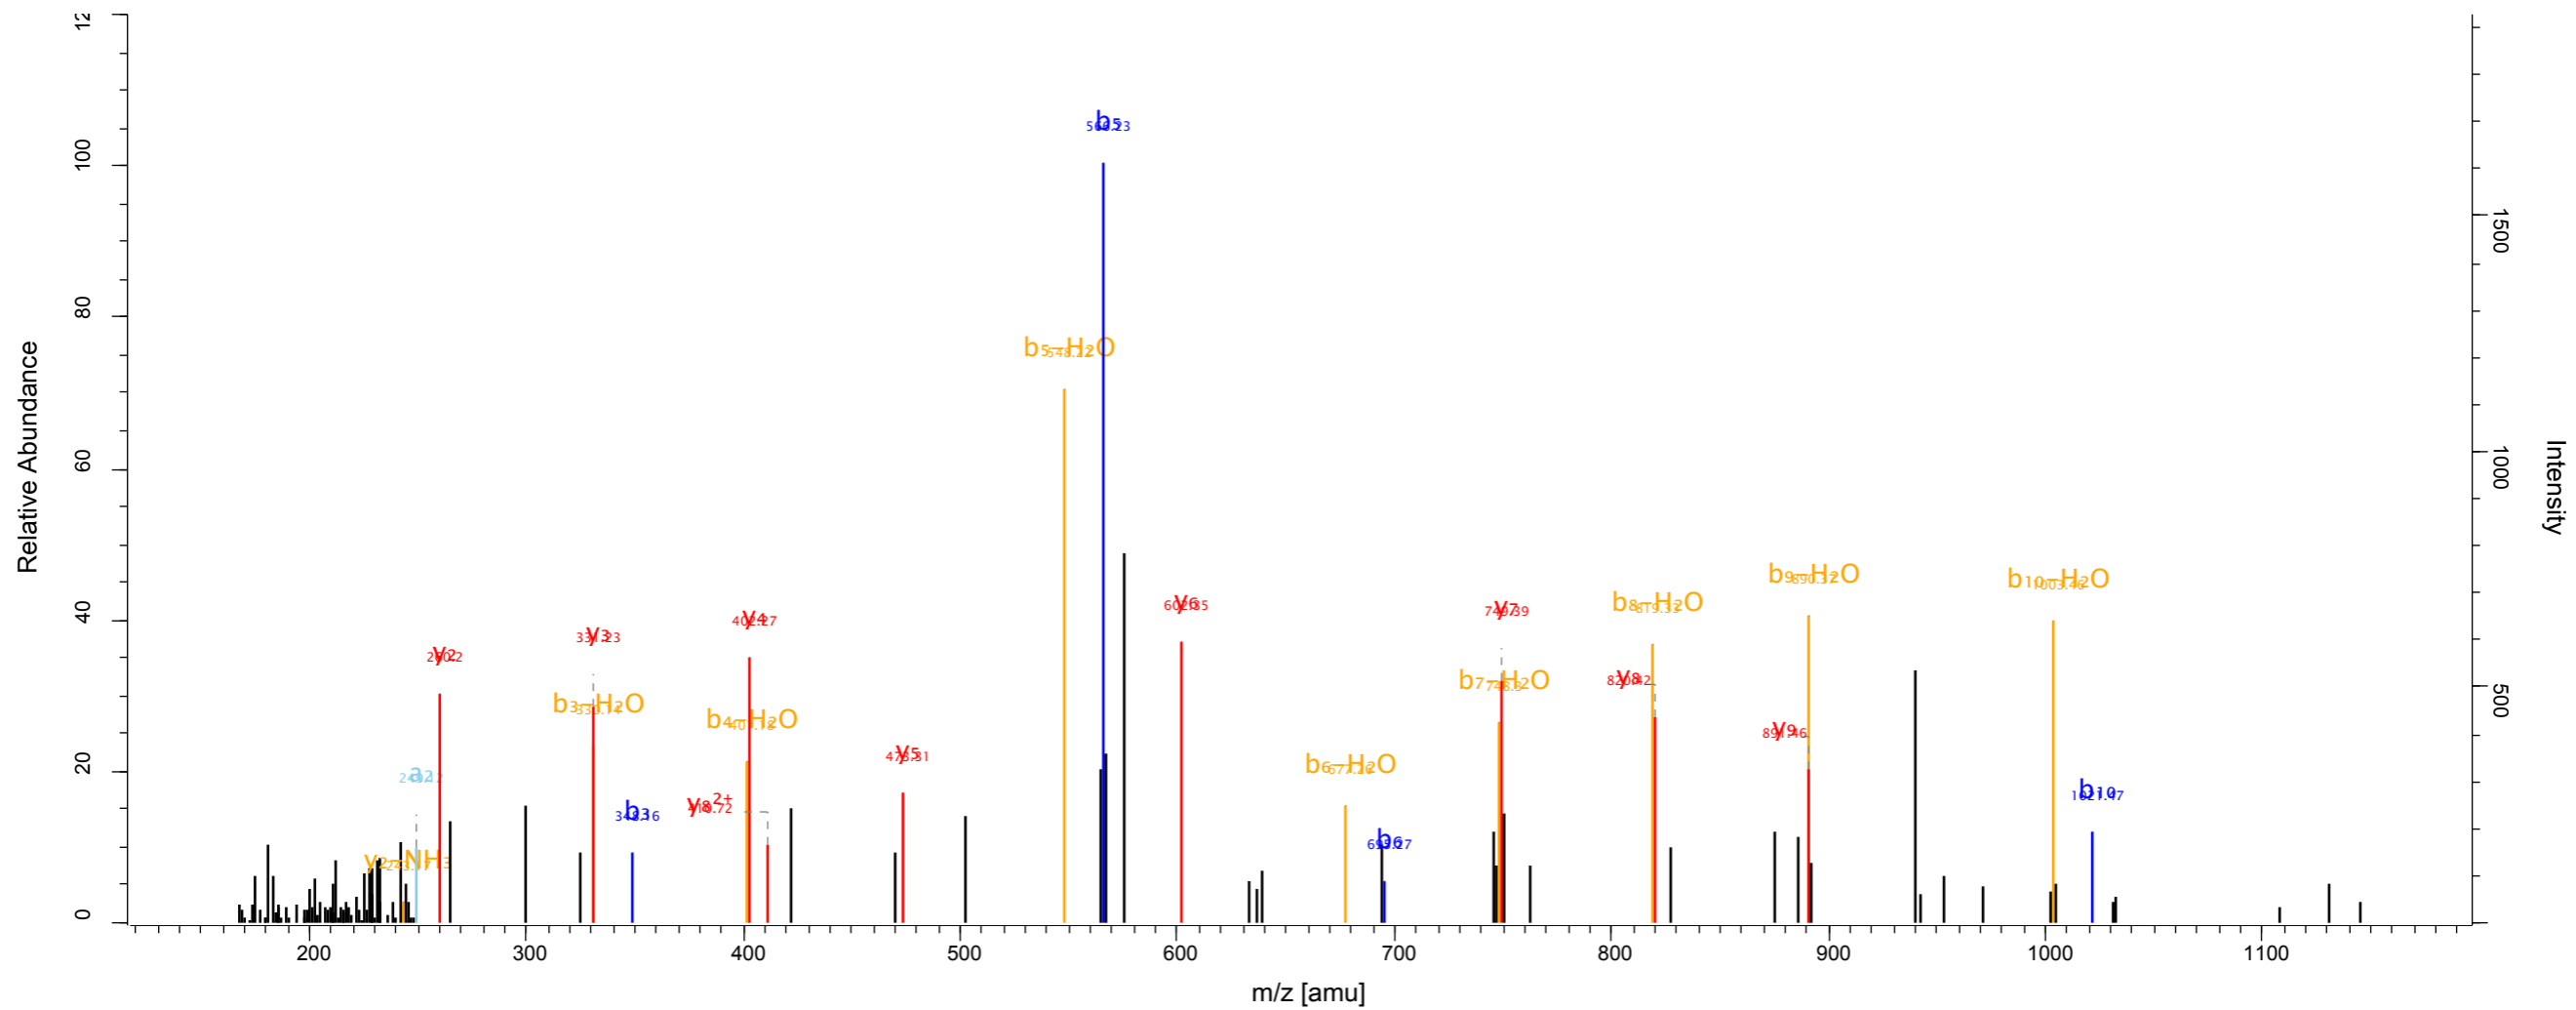

Scan number 7535 Raw file SKaraca\_LMB\_H3\_rev\_280811\_15\_rep3  
 Method ITMS; CID Pepti... 191.93

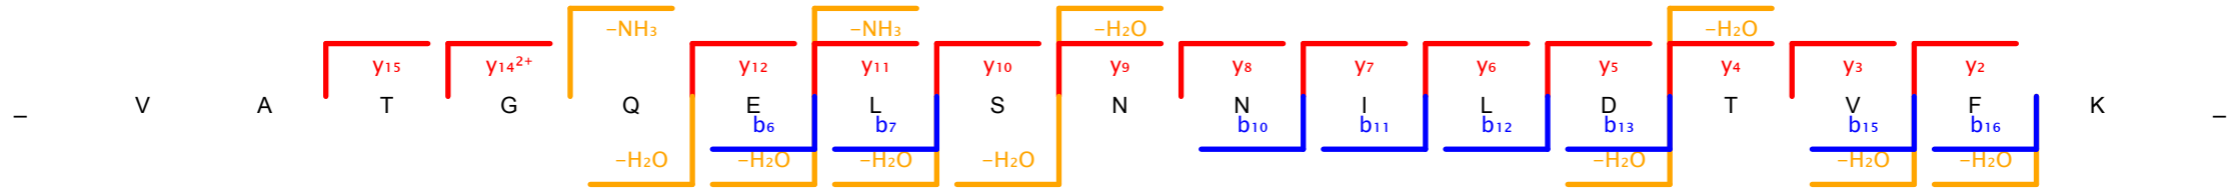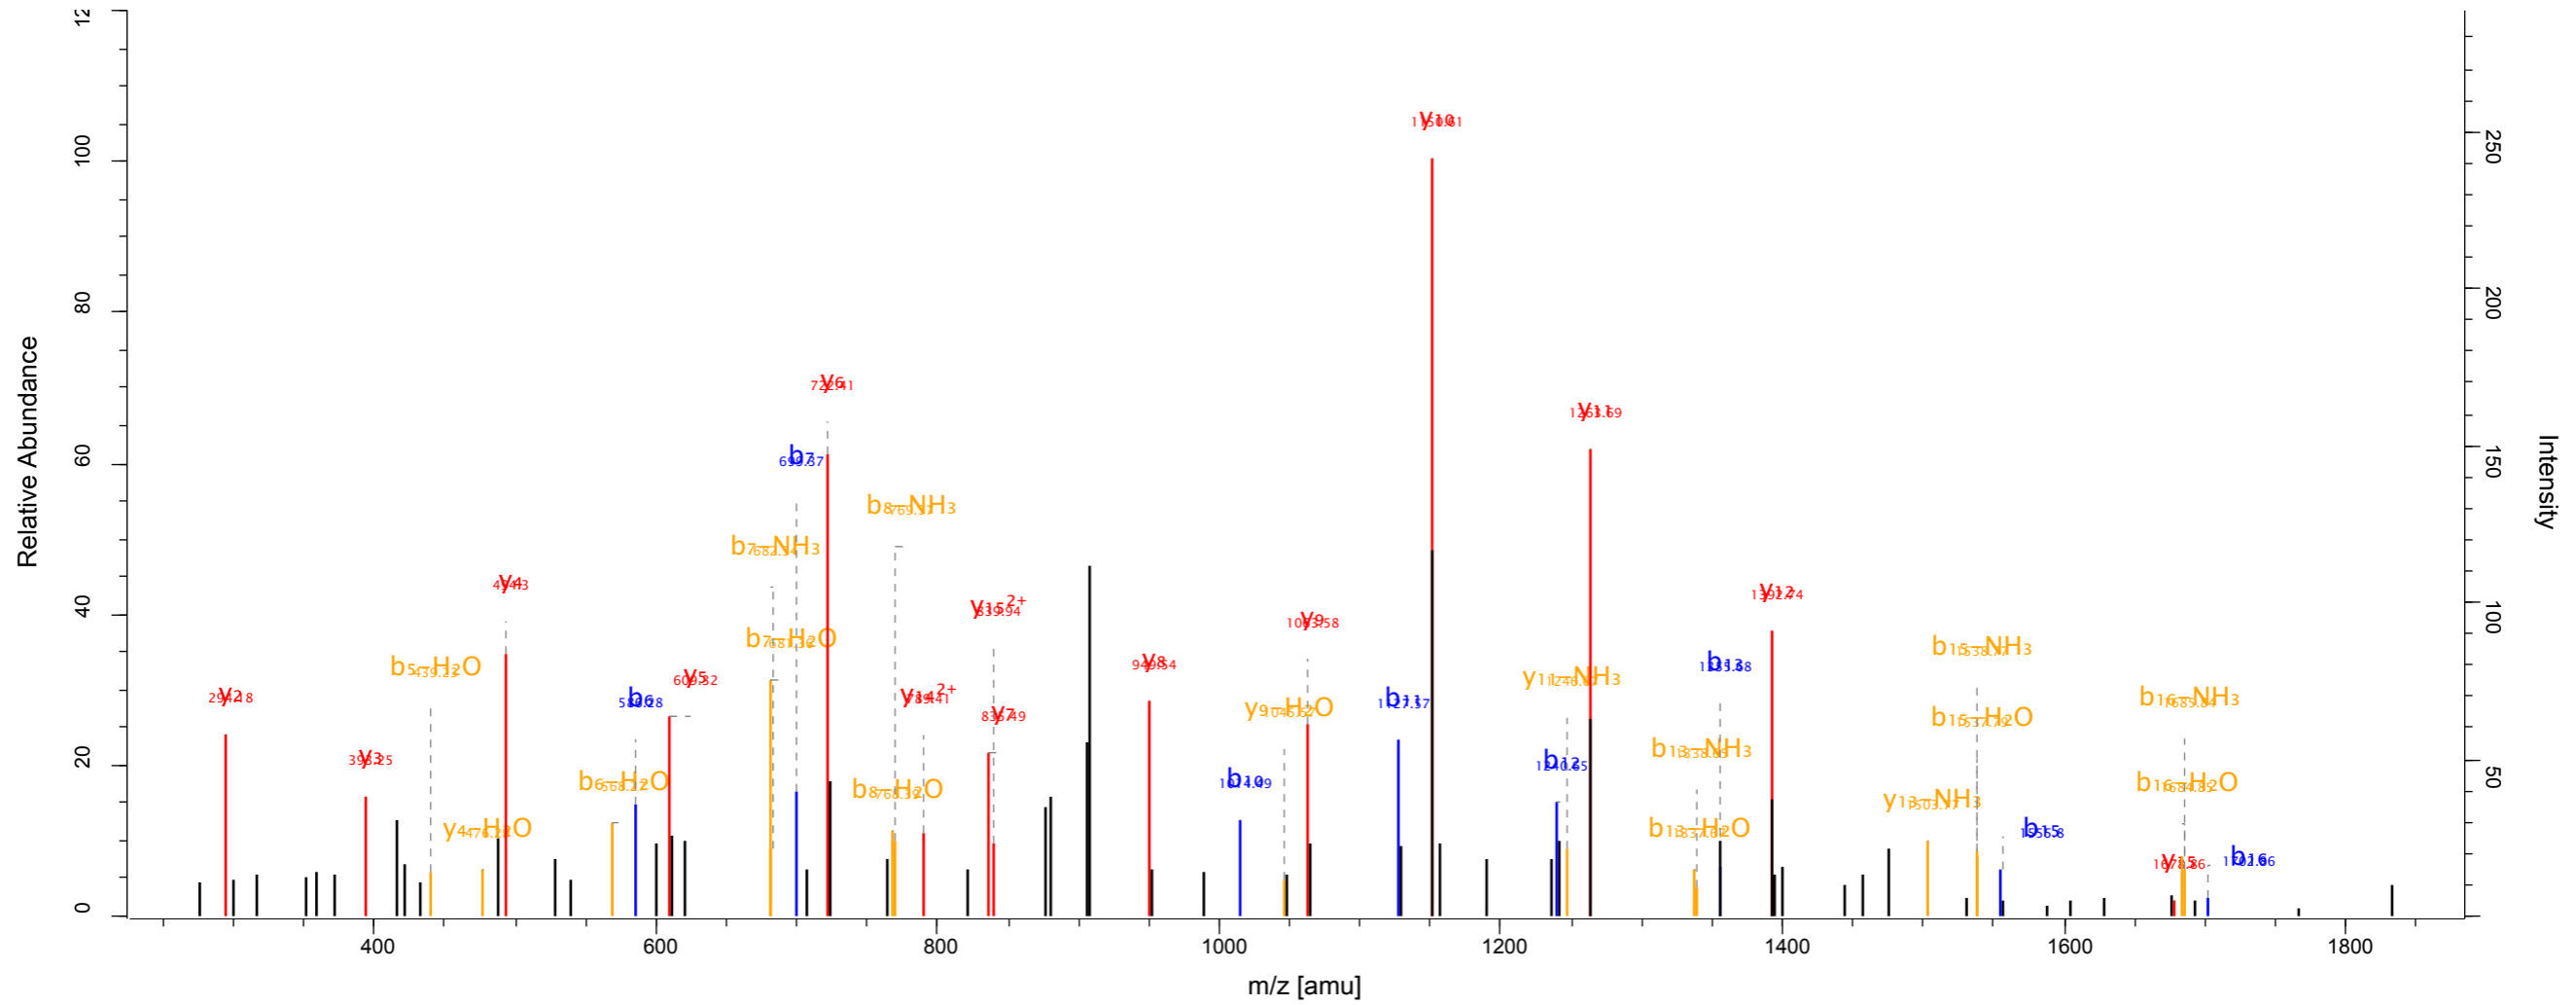

Scan number 7329 Raw file SKaraca\_LMB\_H3\_rev\_280811\_20\_rep2  
 Method ITMS; CID Pepti... 187.42

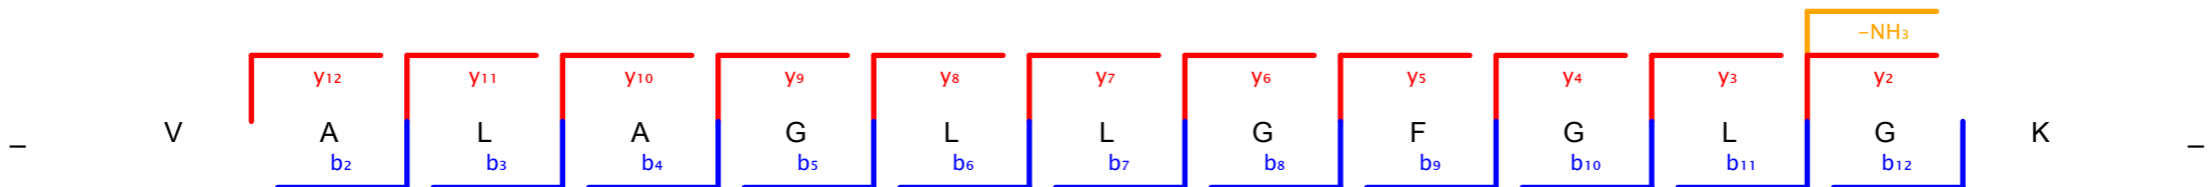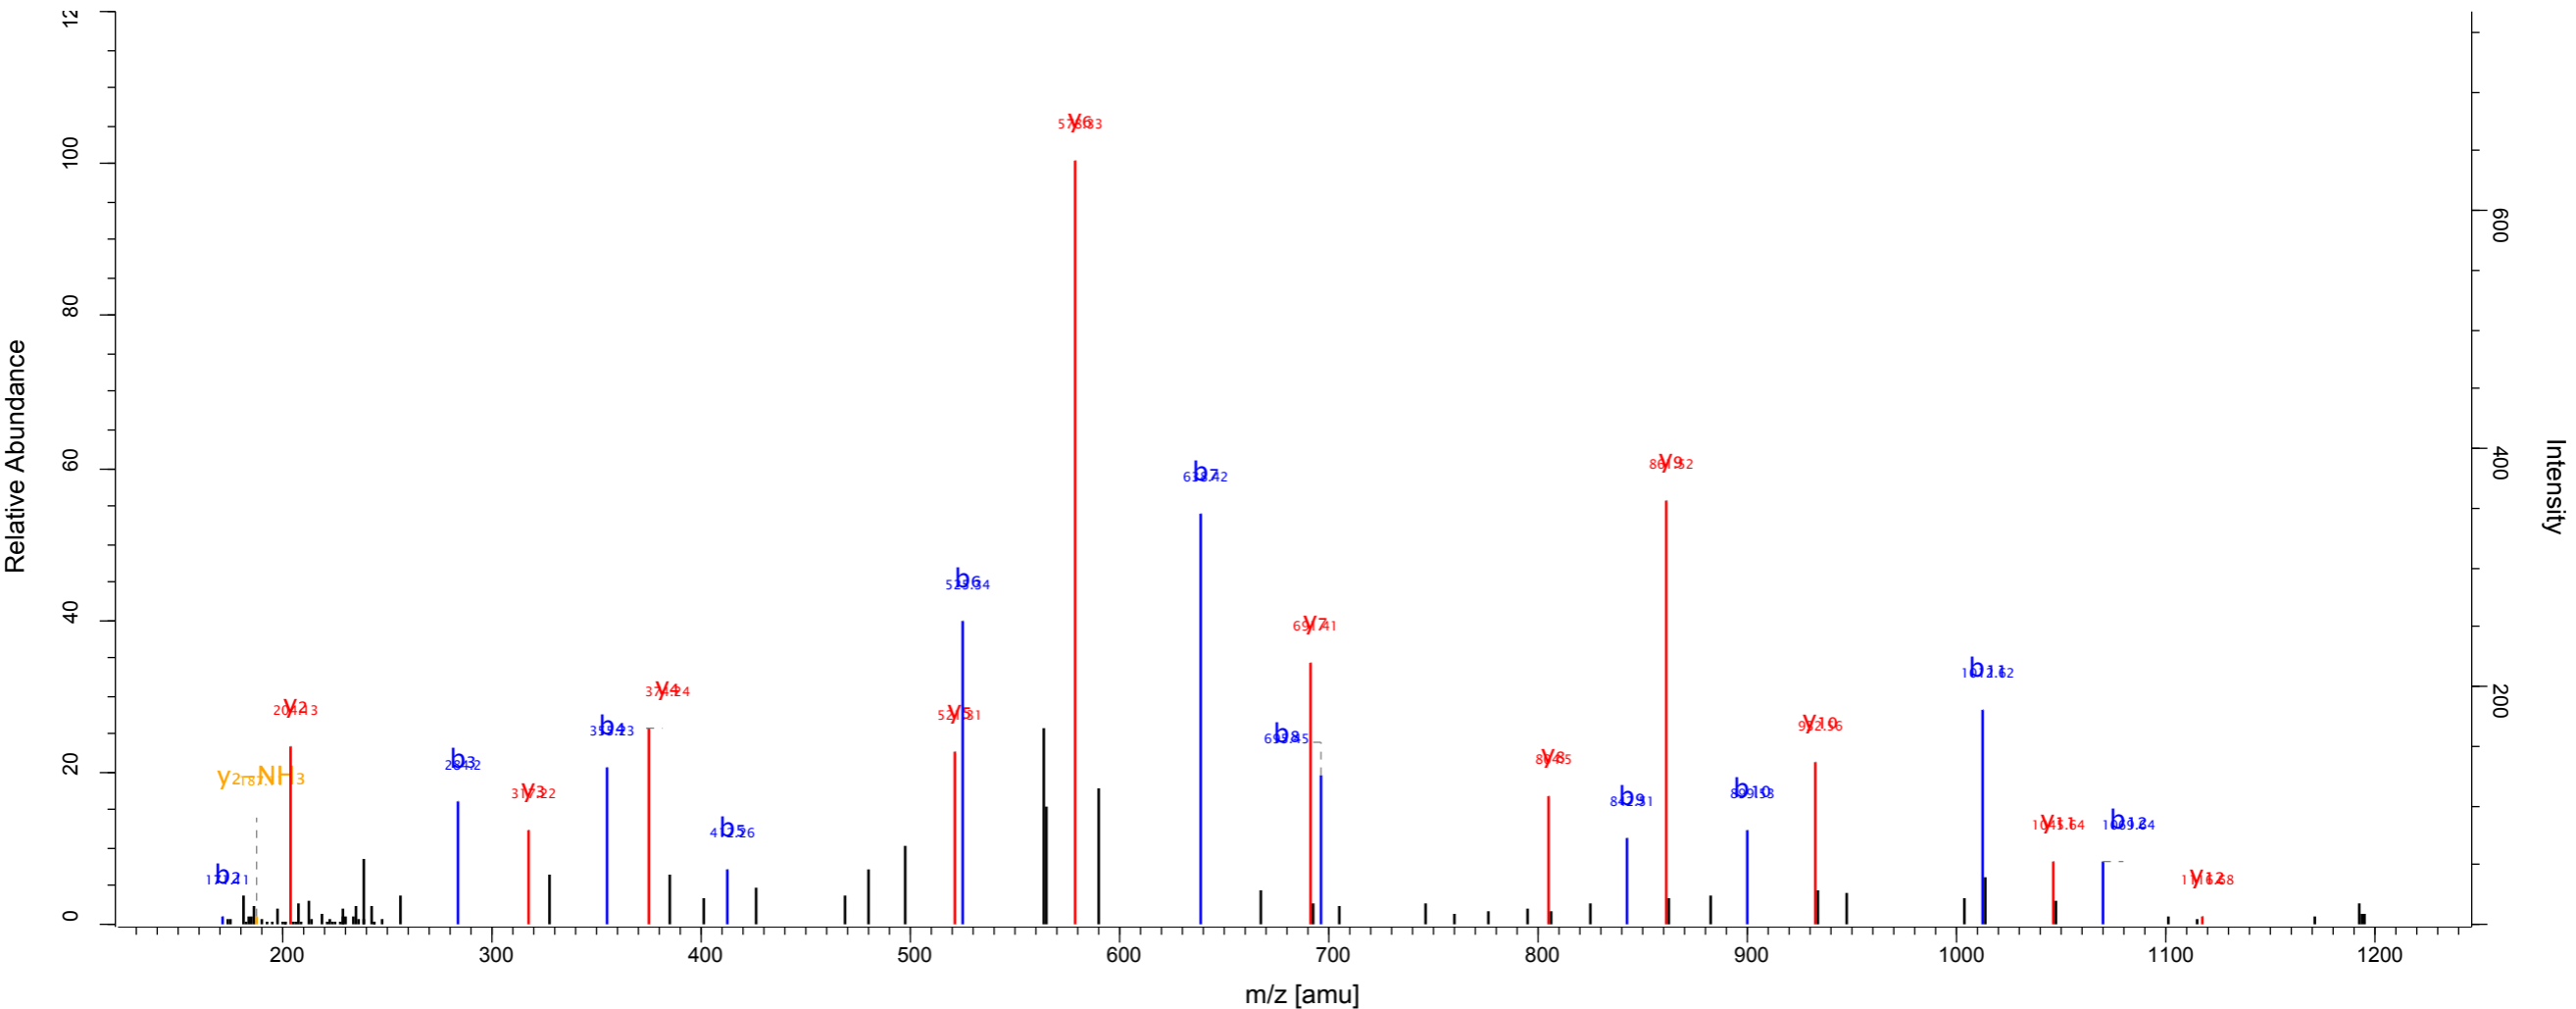

|             |           |          |                                   |
|-------------|-----------|----------|-----------------------------------|
| Scan number | 8144      | Raw file | SKaraca_LMB_H3_rev_280811_21_rep2 |
| Method      | ITMS; CID | Pepti... | 102.33                            |

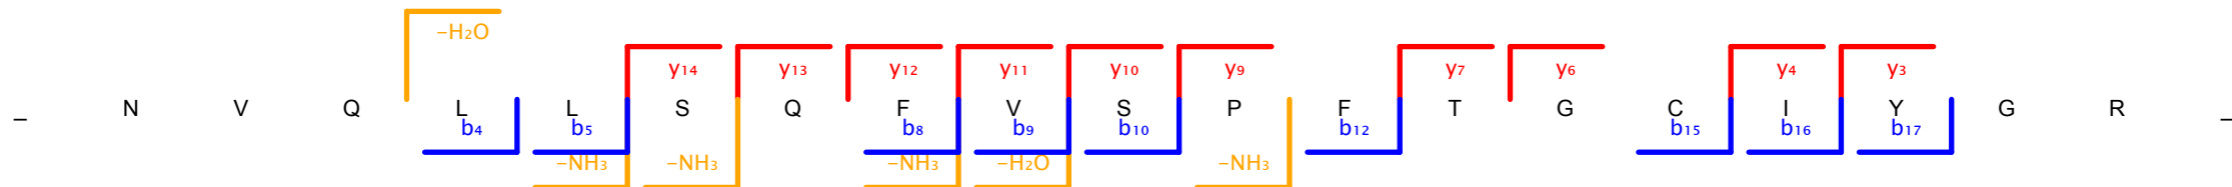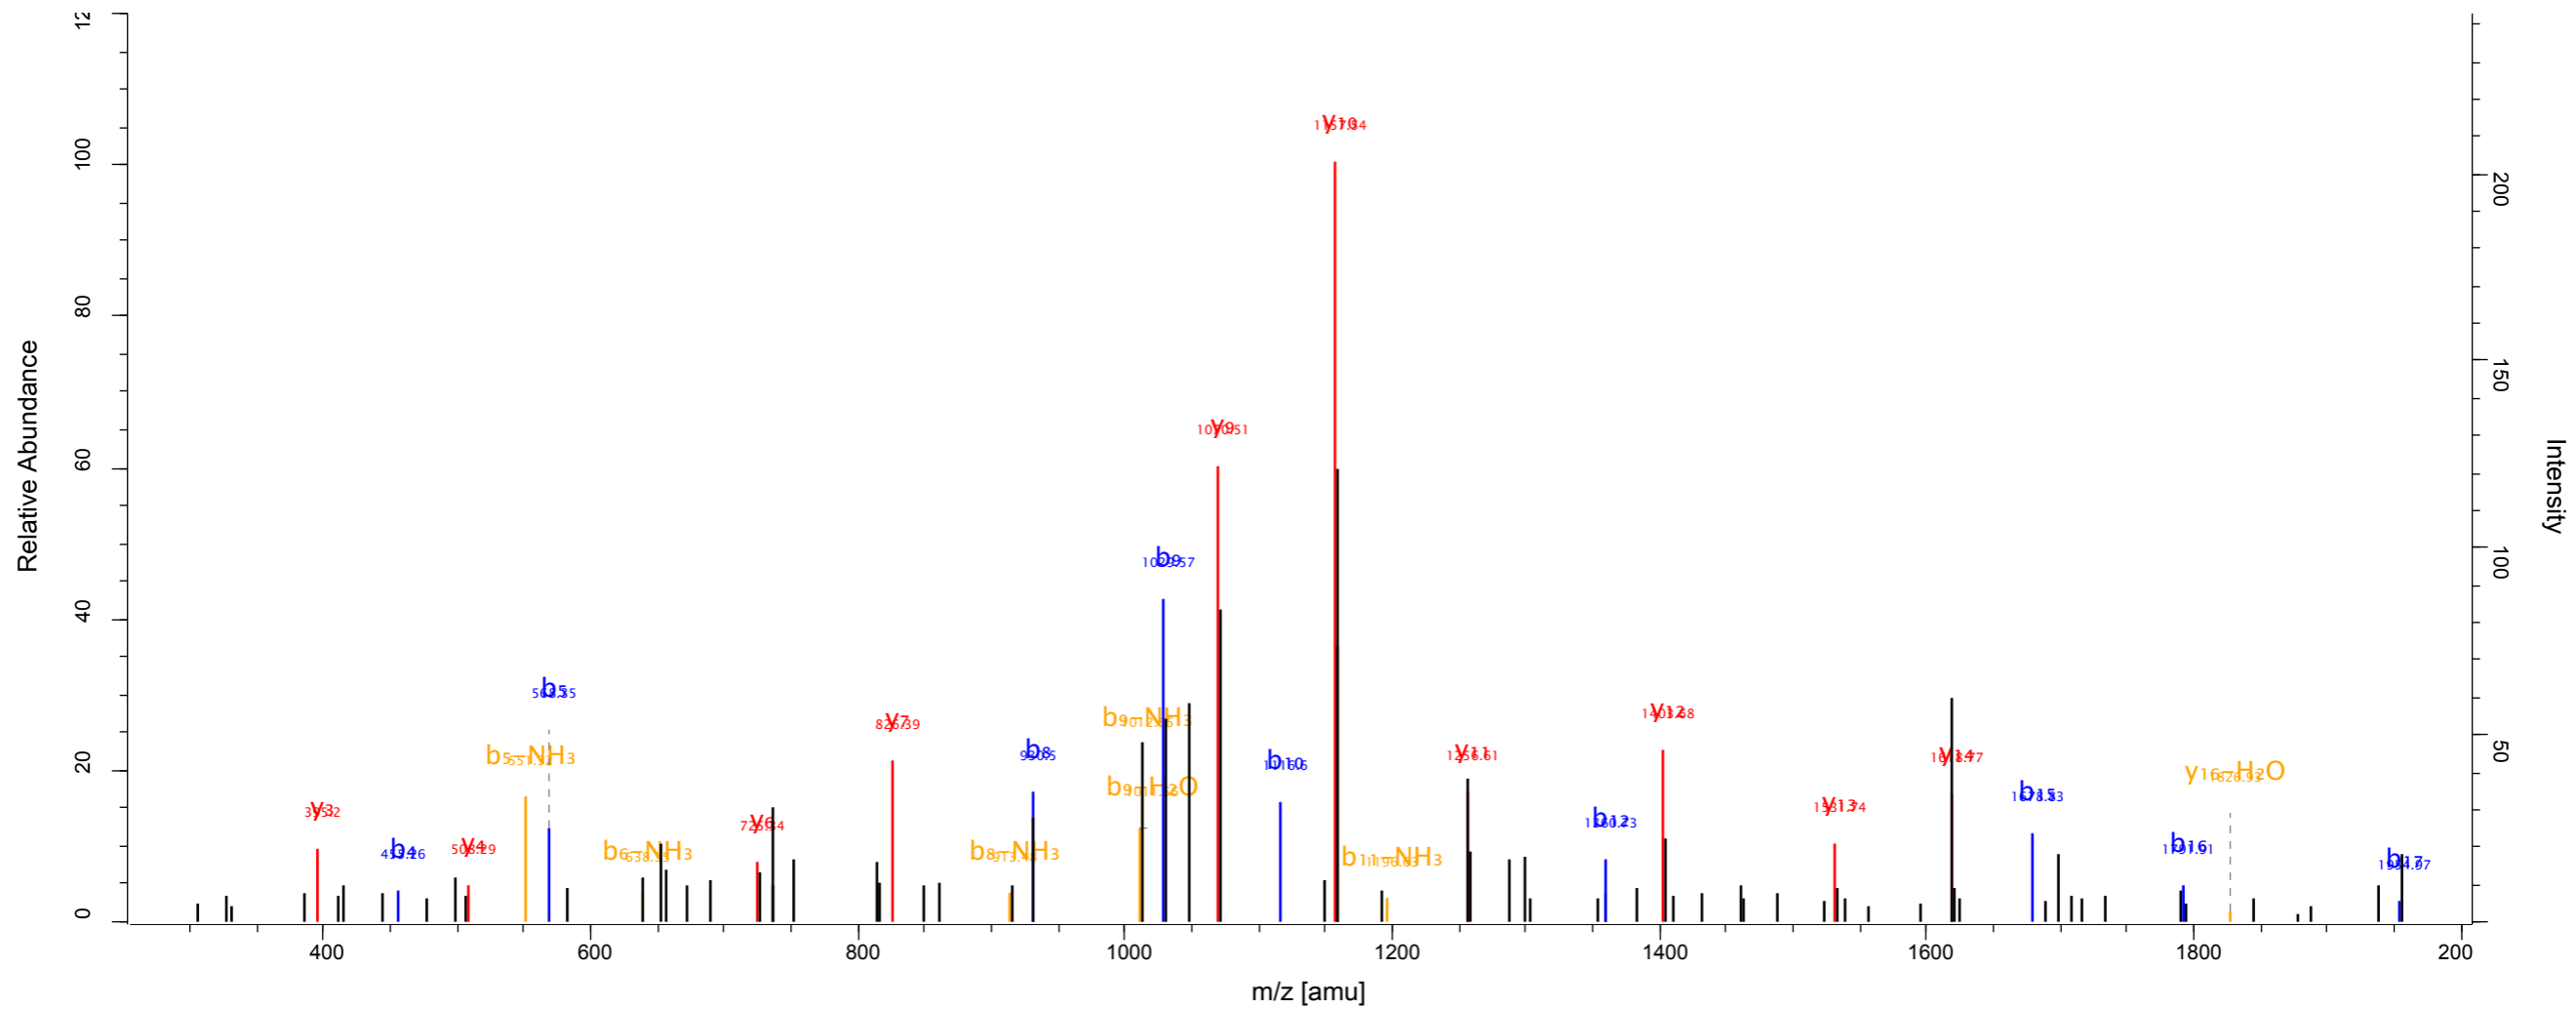

|             |           |          |                                   |
|-------------|-----------|----------|-----------------------------------|
| Scan number | 6633      | Raw file | SKaraca_LMB_H3_rev_280811_22_rep2 |
| Method      | ITMS; CID | Pepti... | 144.1                             |

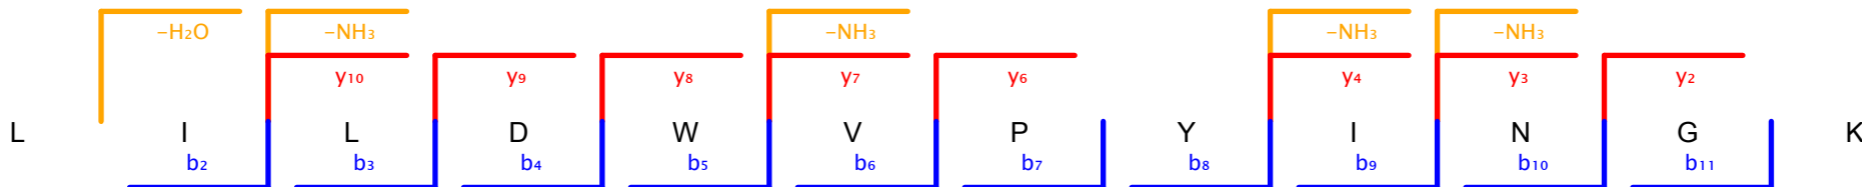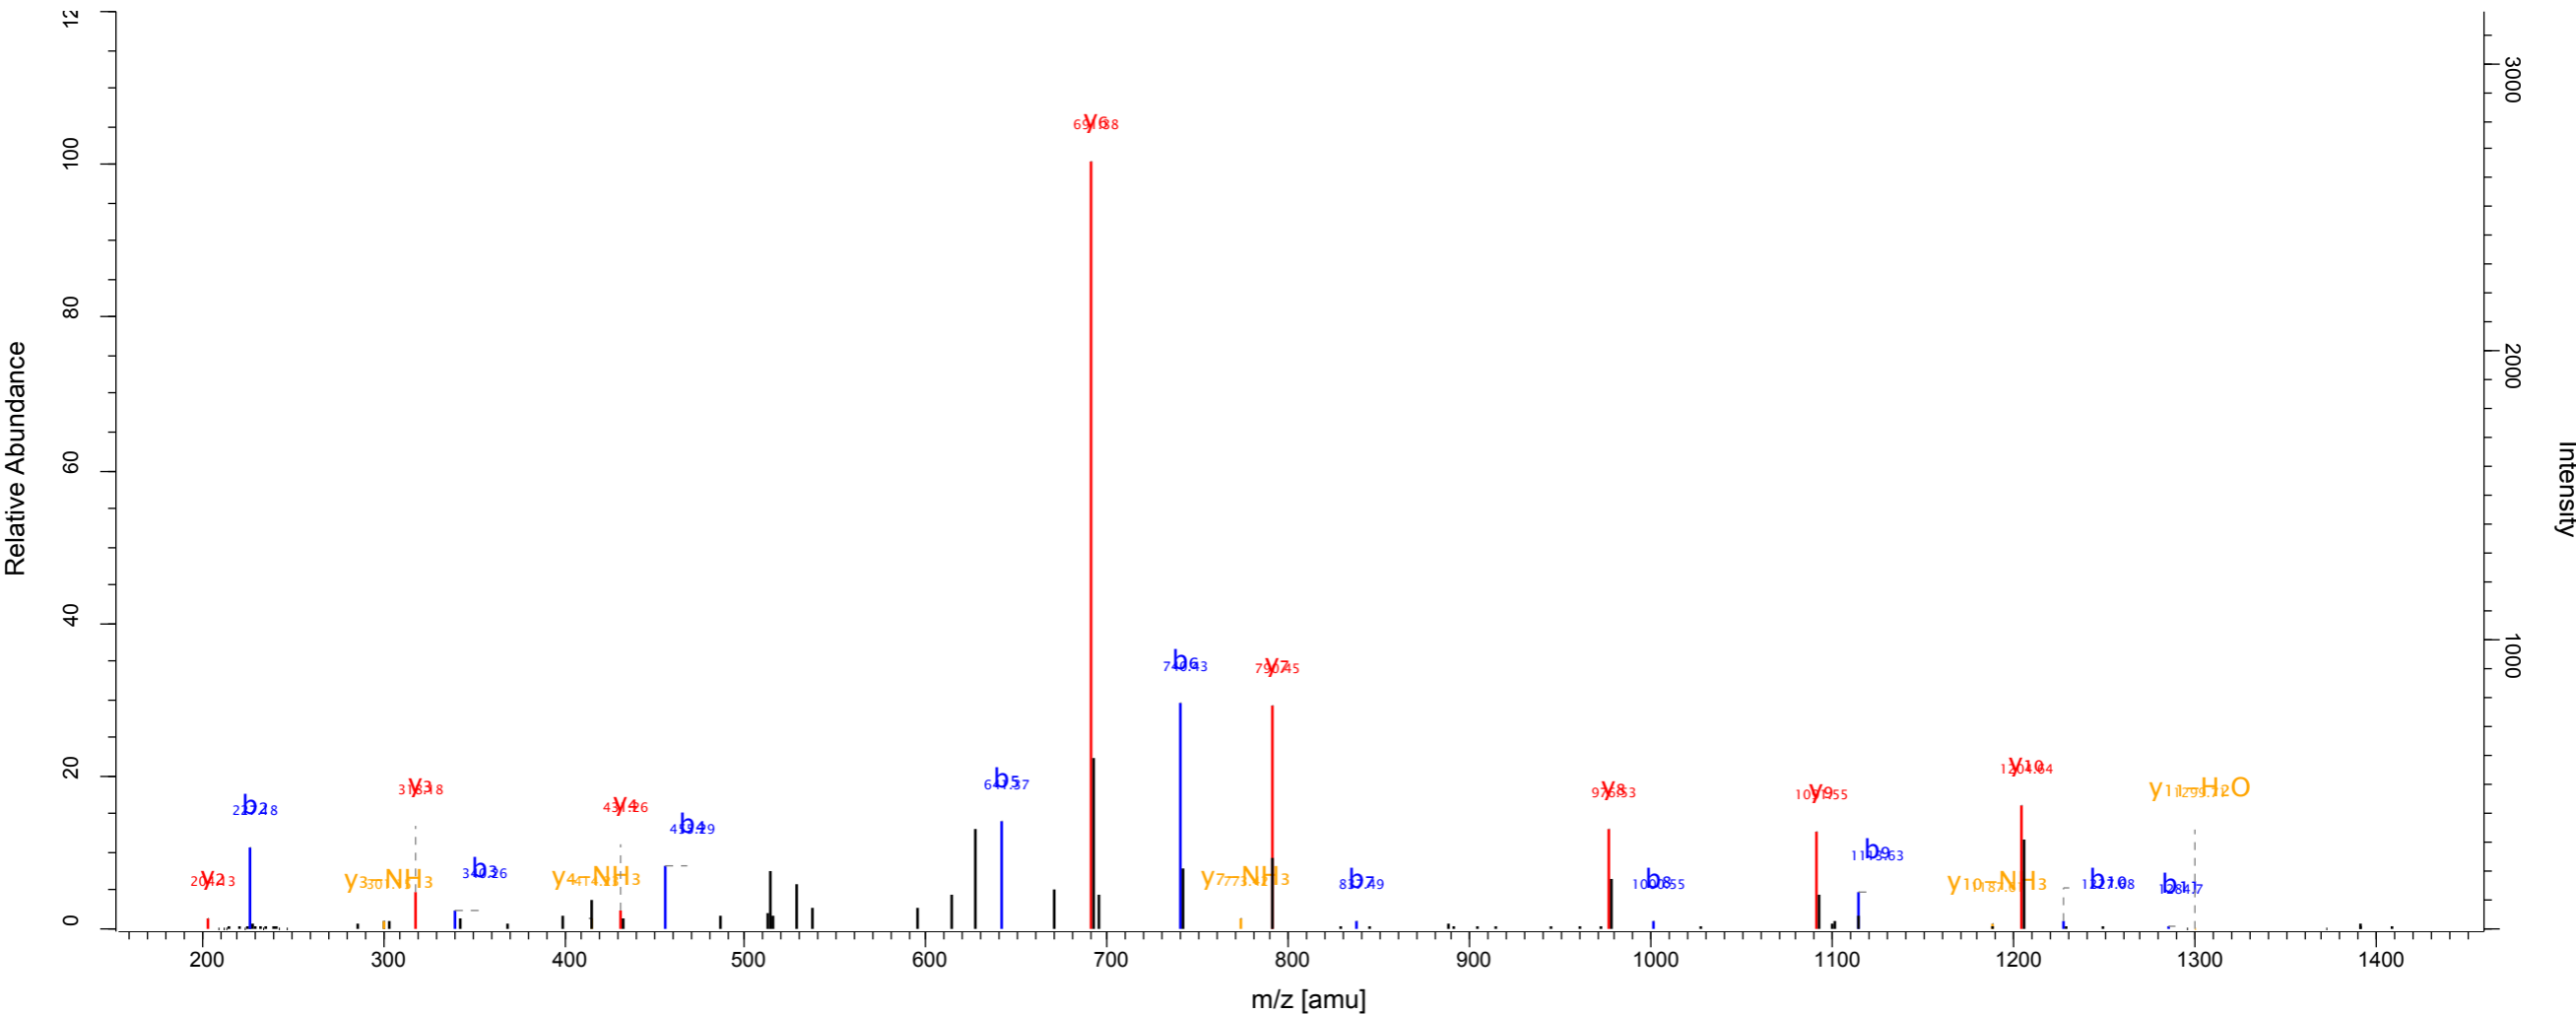

Scan number 6457 Raw file SKaraca\_LMB\_H3\_rev\_280811\_22\_rep3  
 Method ITMS; CID Pepti... 104.94

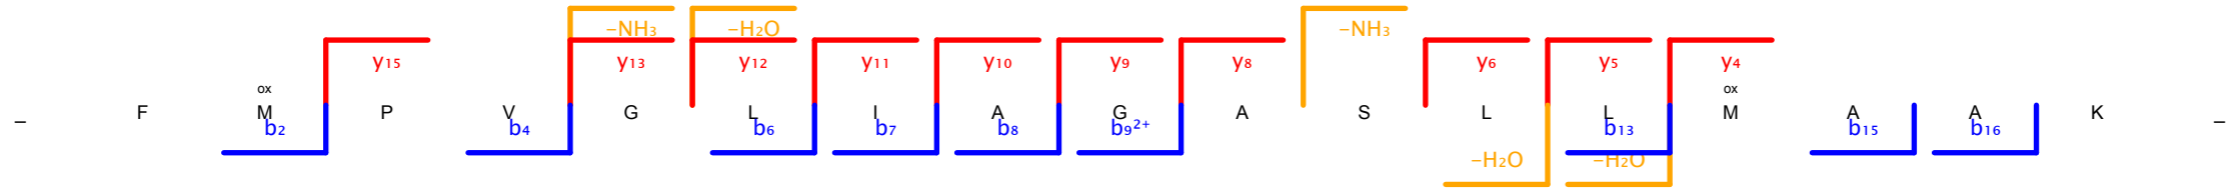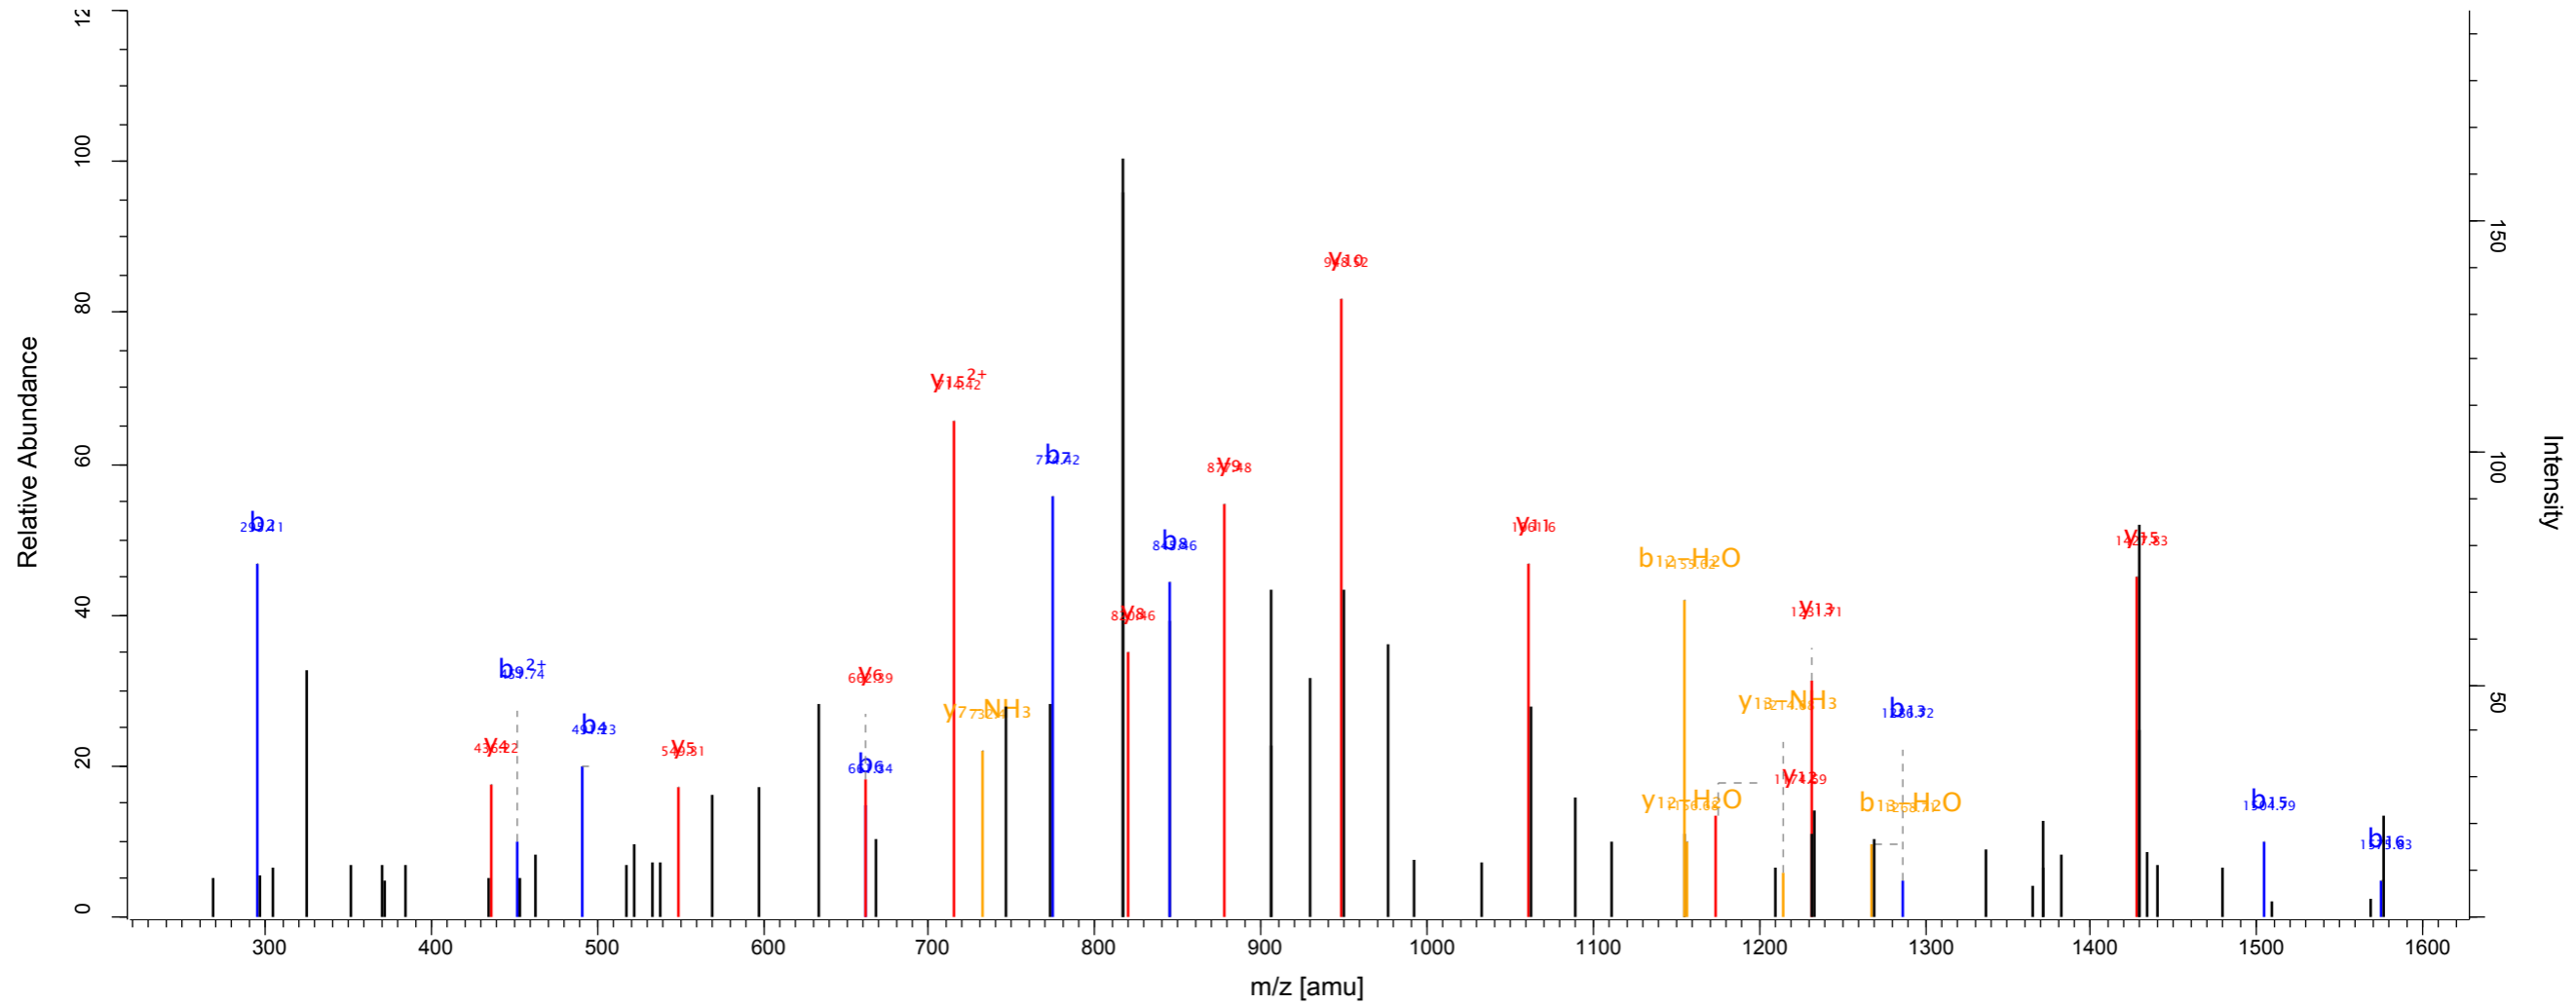



Scan number 5103 Raw file SKaraca\_LMB\_H3\_rev\_280811\_9\_rep3  
 Method ITMS; CID Pepti... 162.26

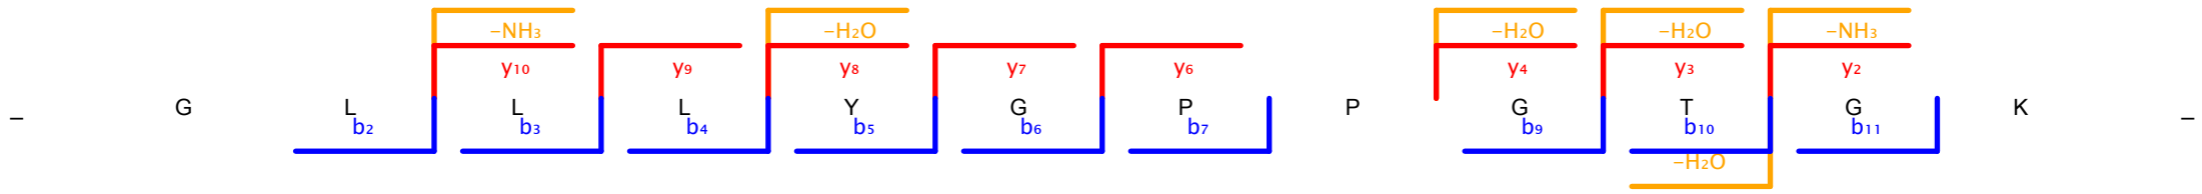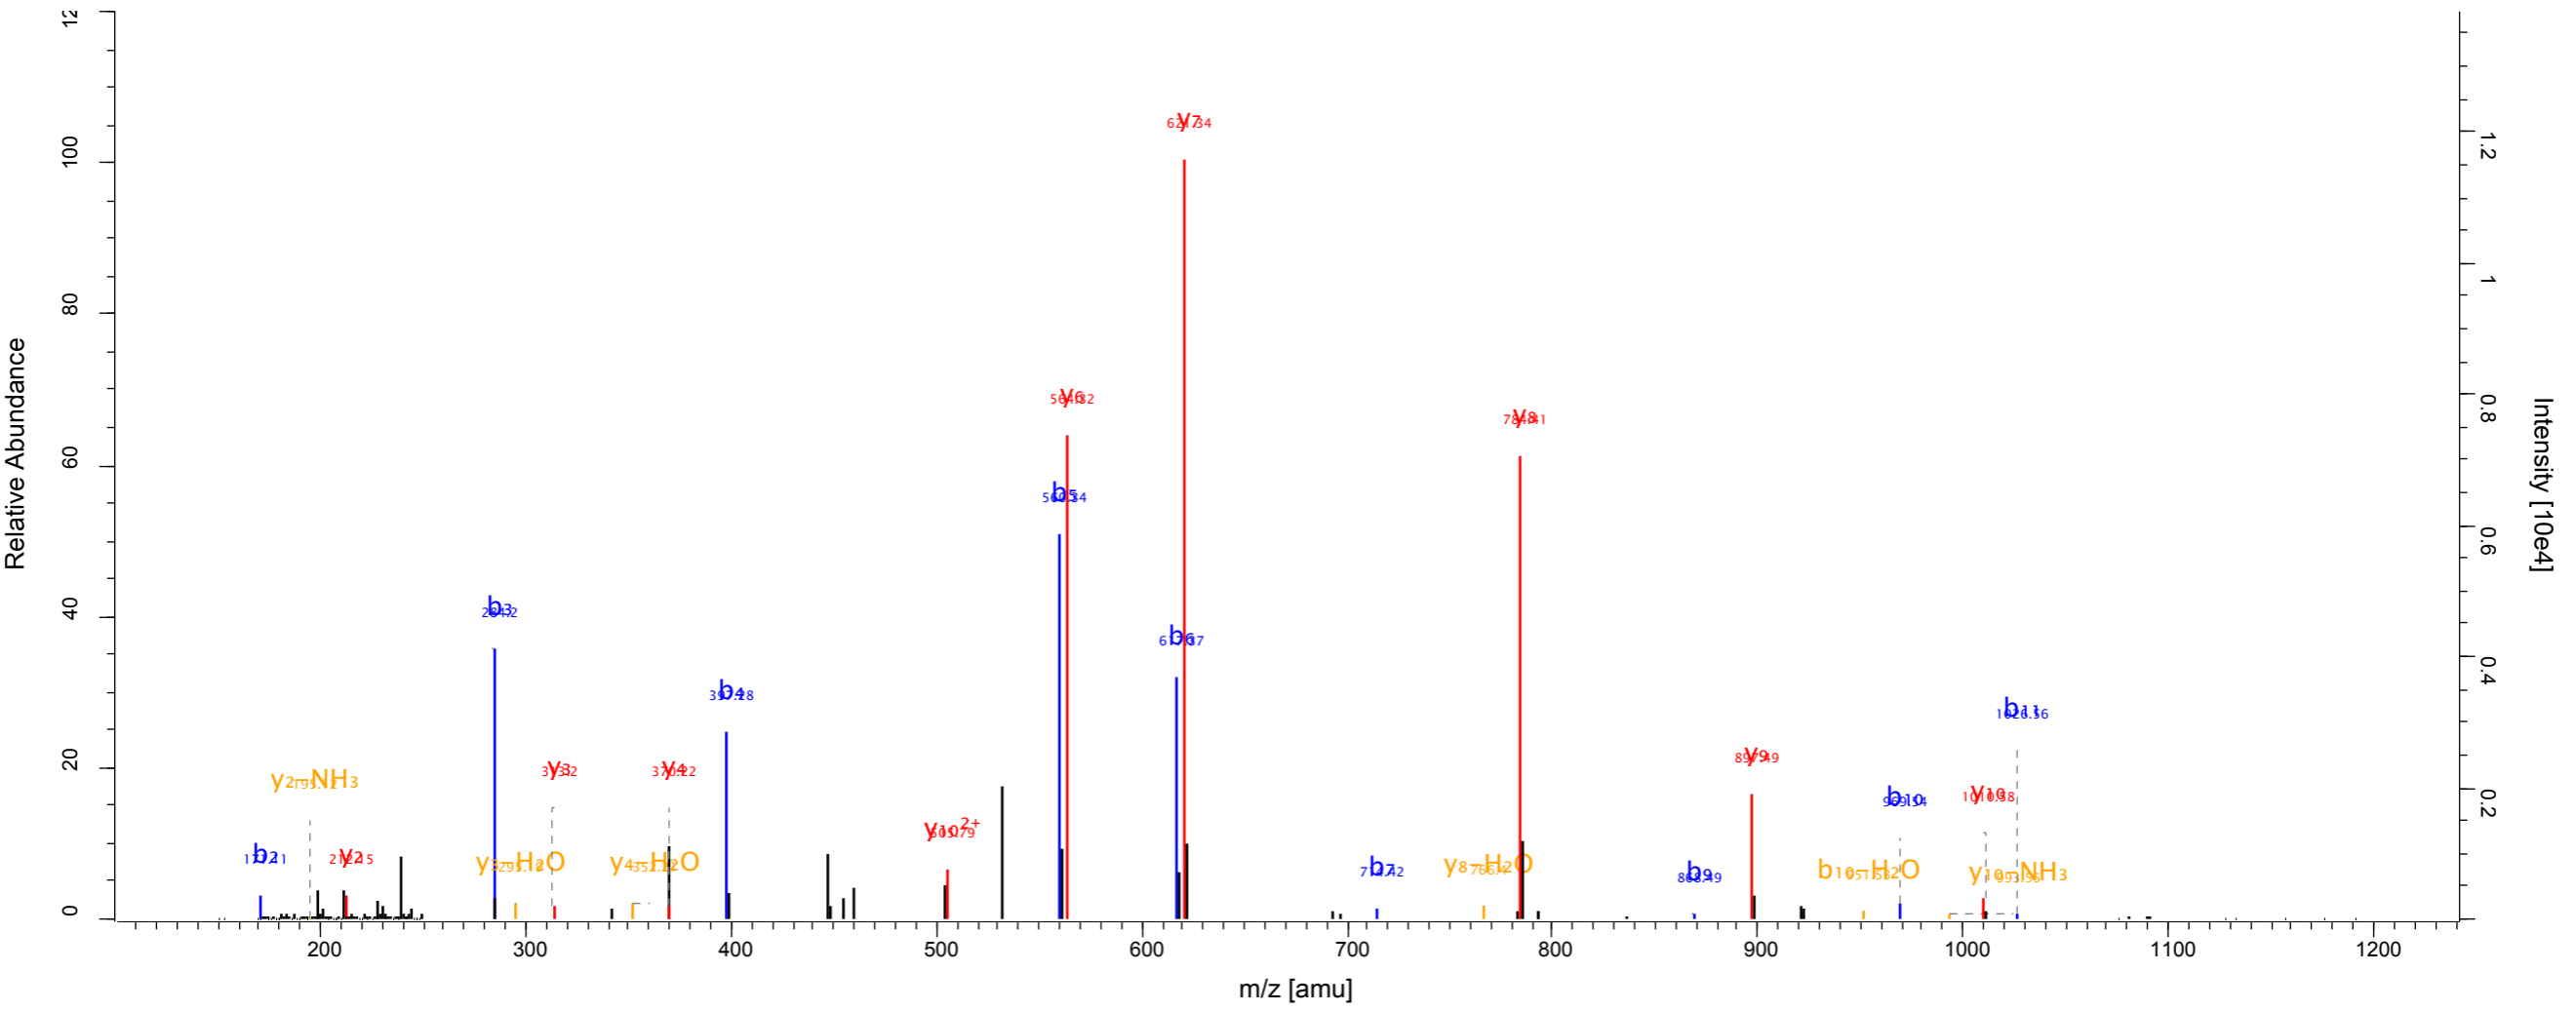

Scan number 3055 Raw file SKaraca\_LMB\_Reverse\_H3\_161011\_1\_rep1  
 Method ITMS; CID Pepti... 140.91

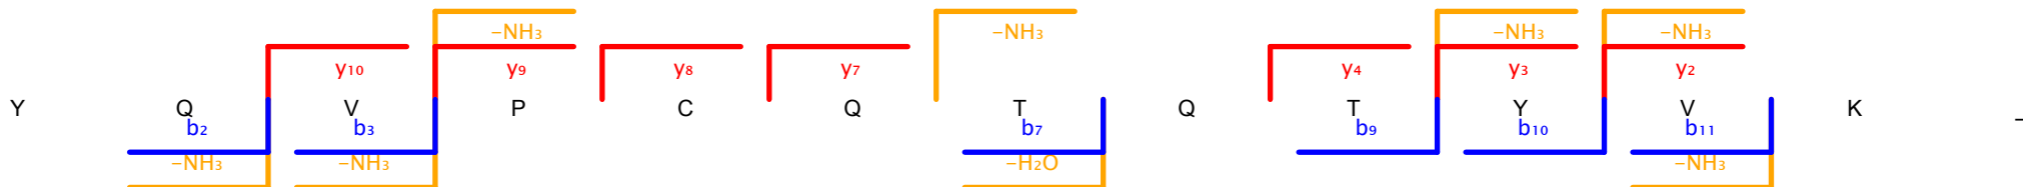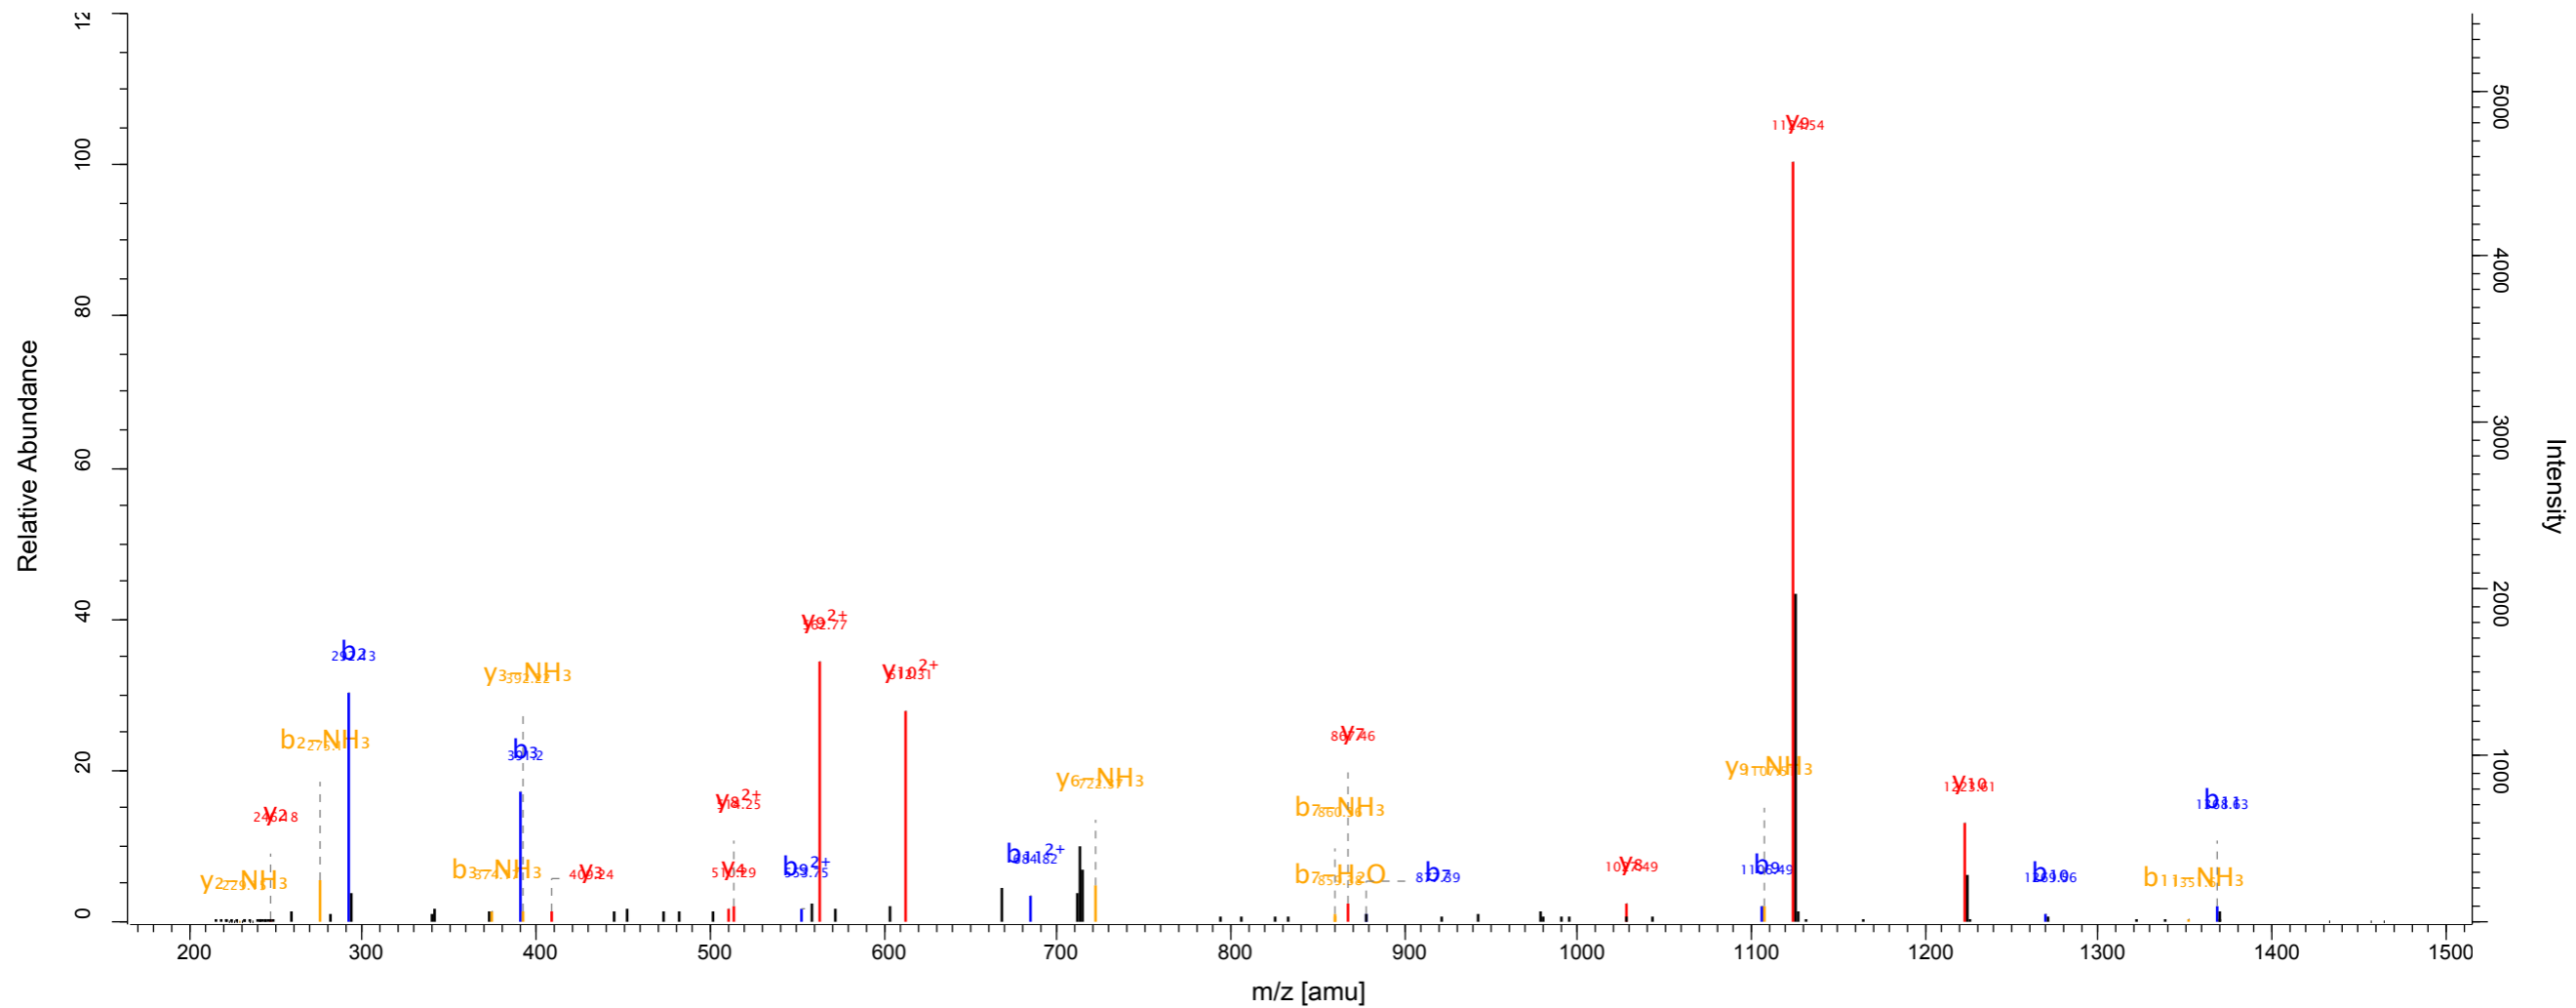

Scan number 3135 Raw file SKaraca\_LMB\_Reverse\_H3\_161011\_1\_rep1  
 Method ITMS; CID Pepti... 108.67

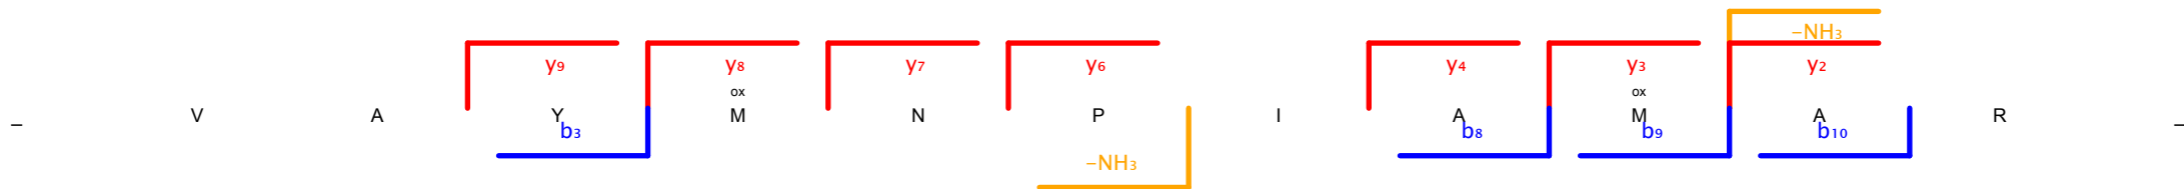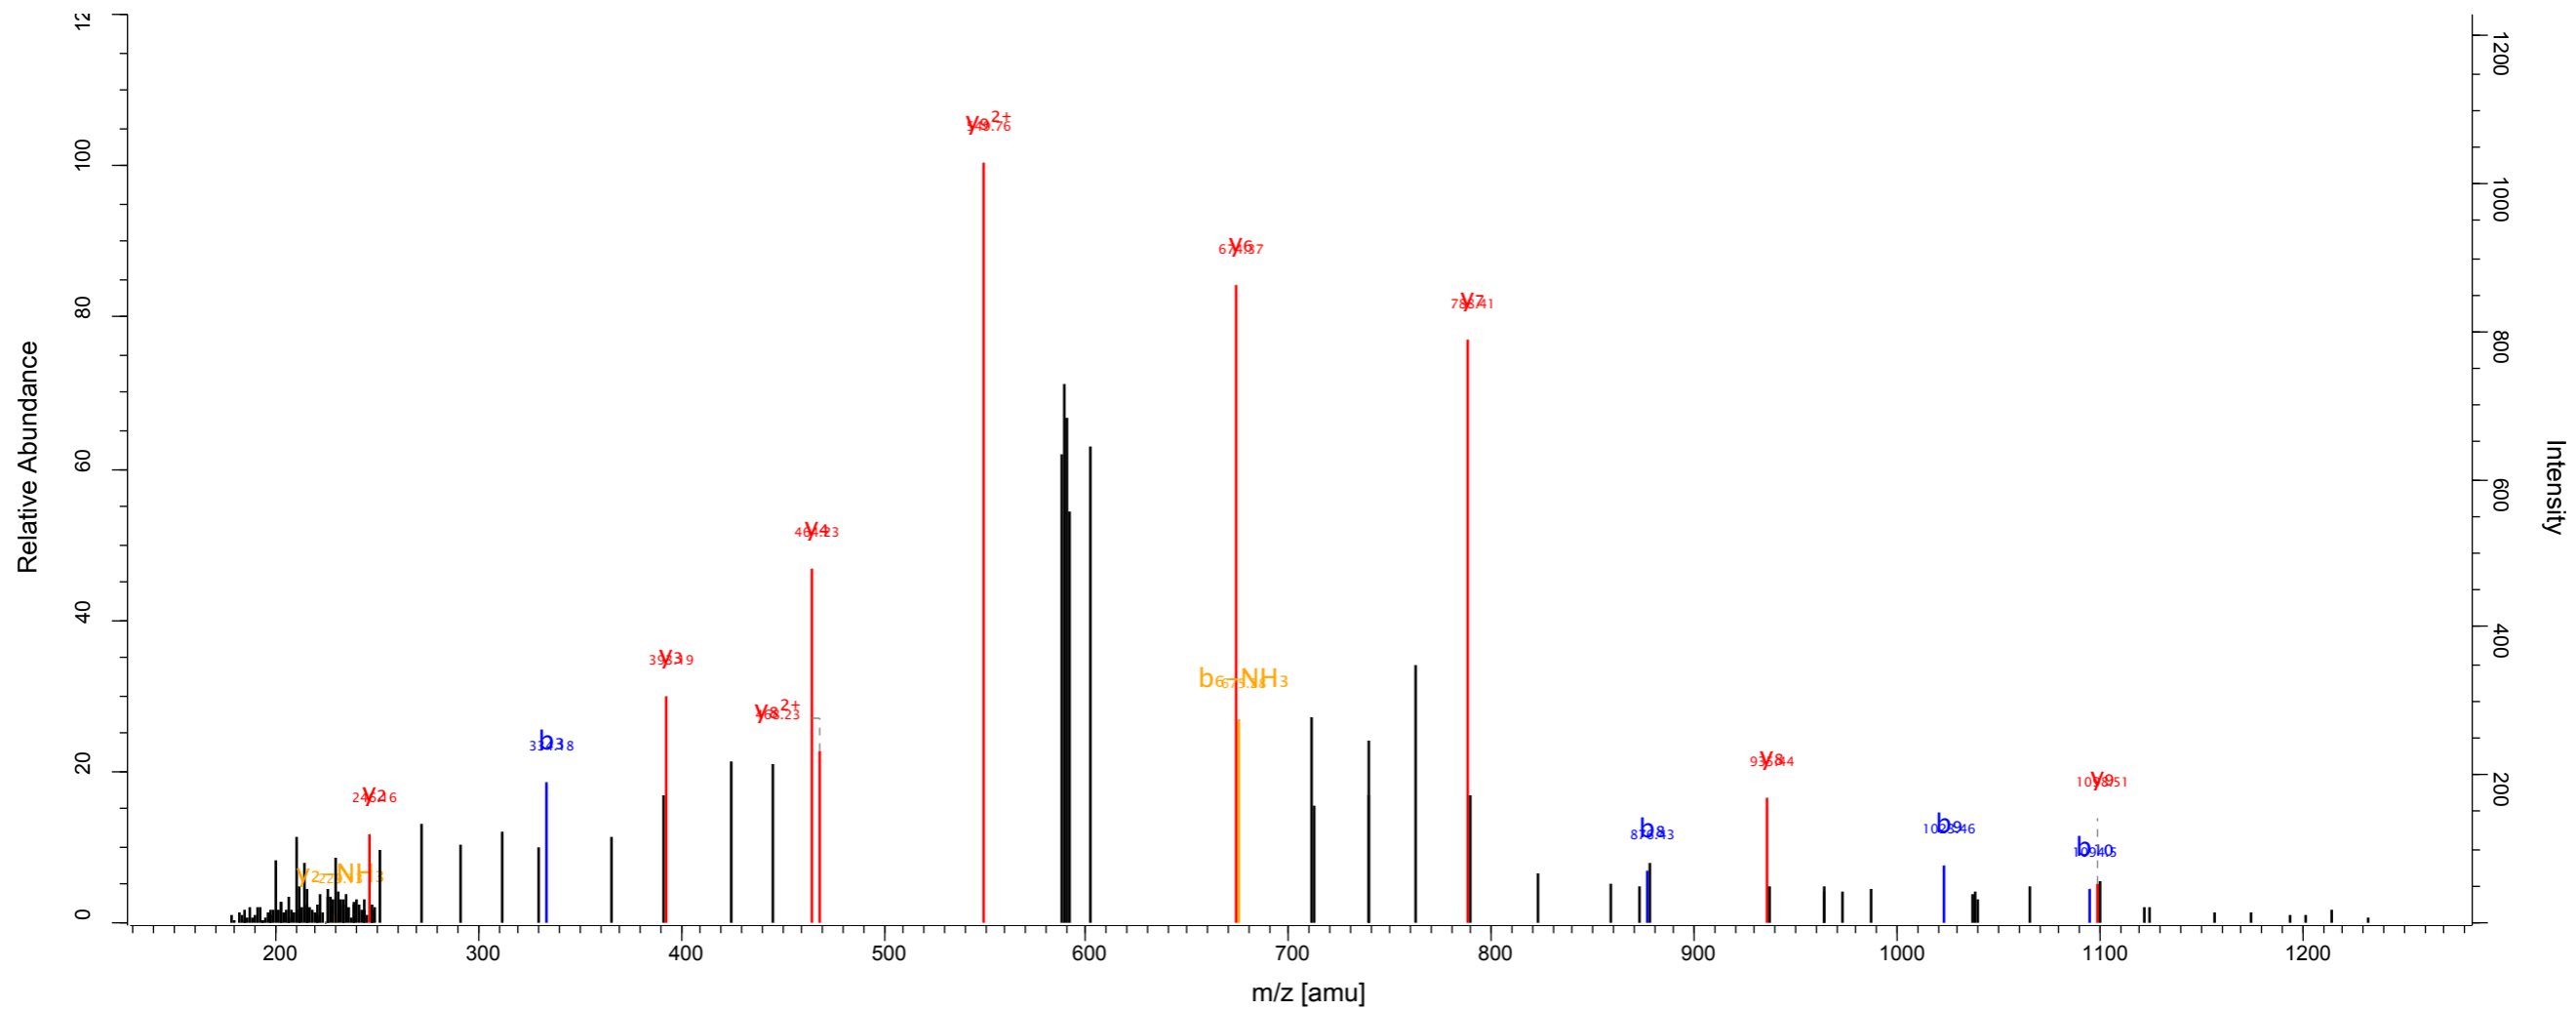

Scan number 8667 Raw file SKaraca\_LMB\_Reverse\_H3\_161011\_10\_rep1  
 Method ITMS; CID Pepti... 115.12

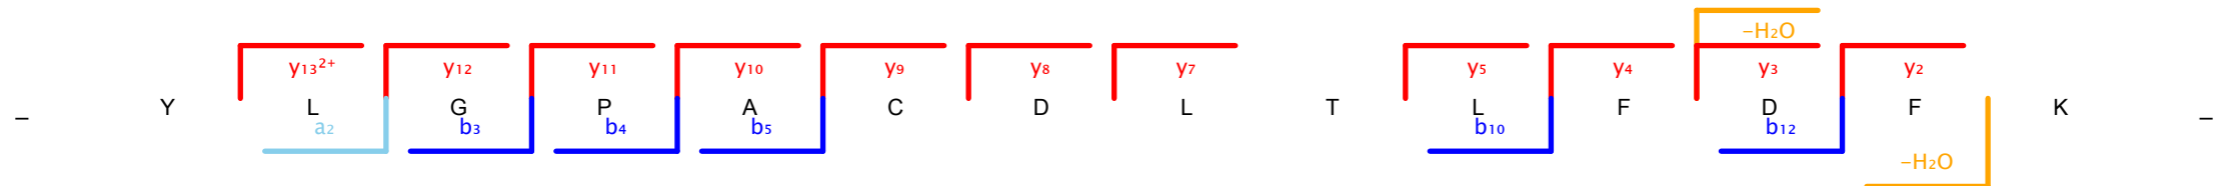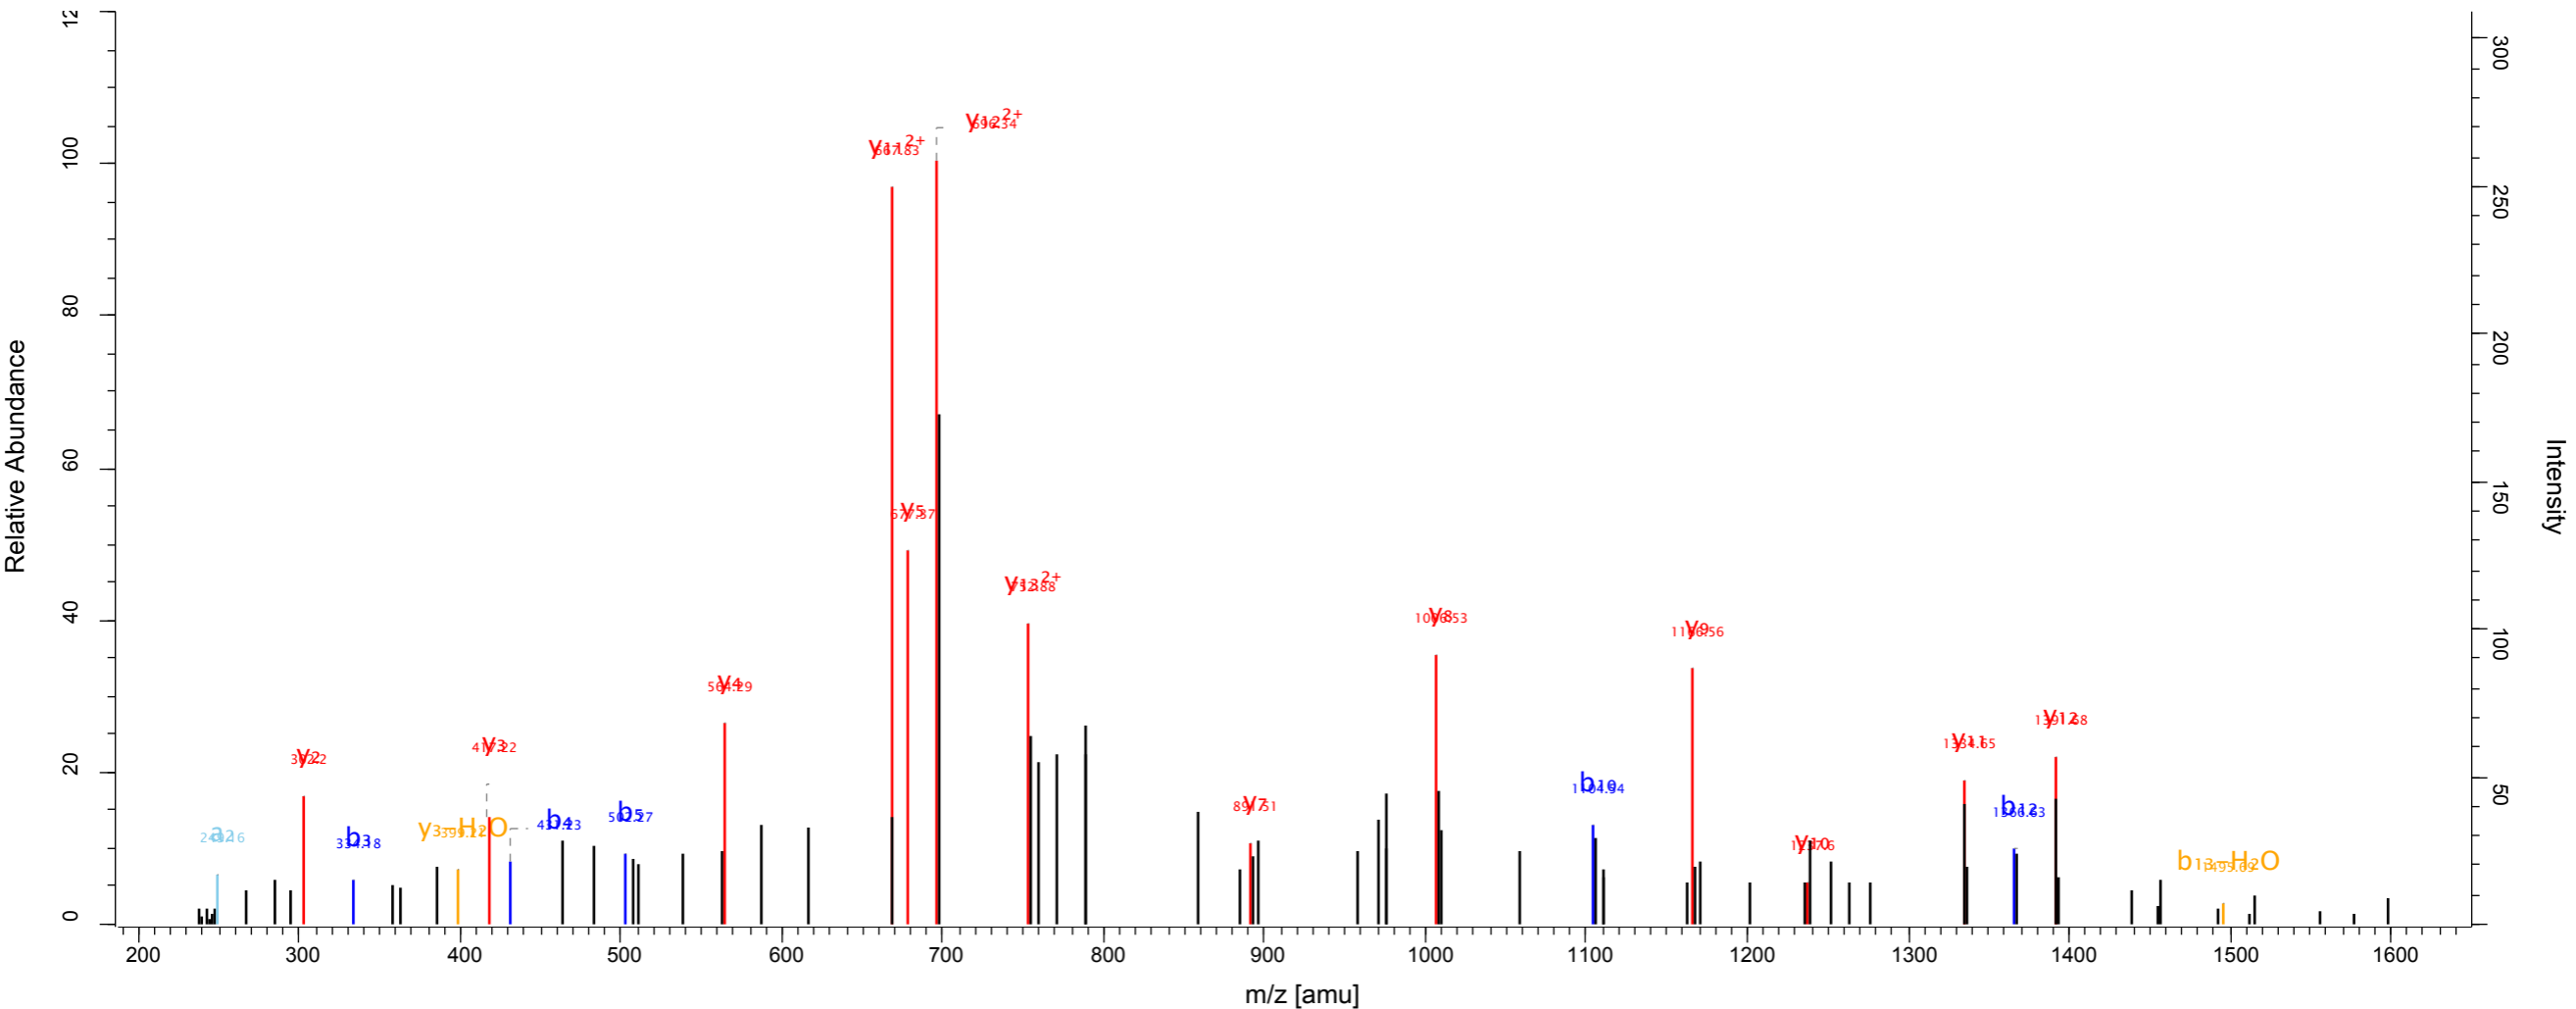

Scan number 2312 Raw file SKaraca\_LMB\_Reverse\_H3\_161011\_10\_rep2  
 Method ITMS; CID Pepti... 144.8

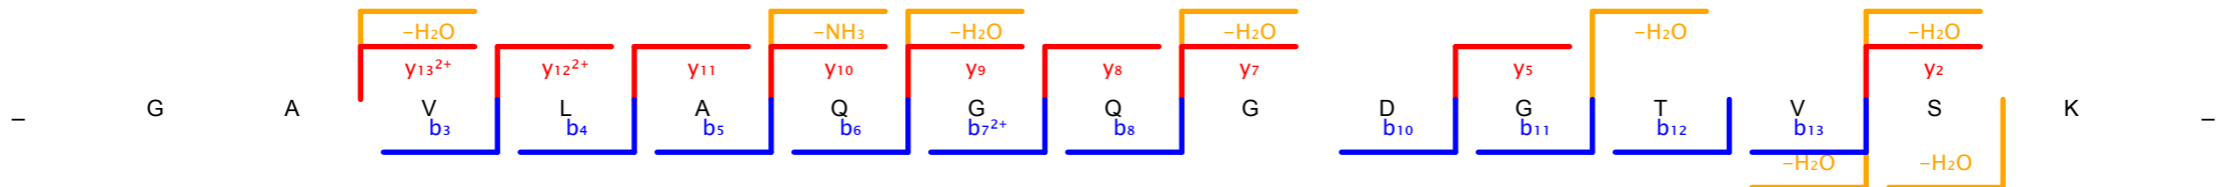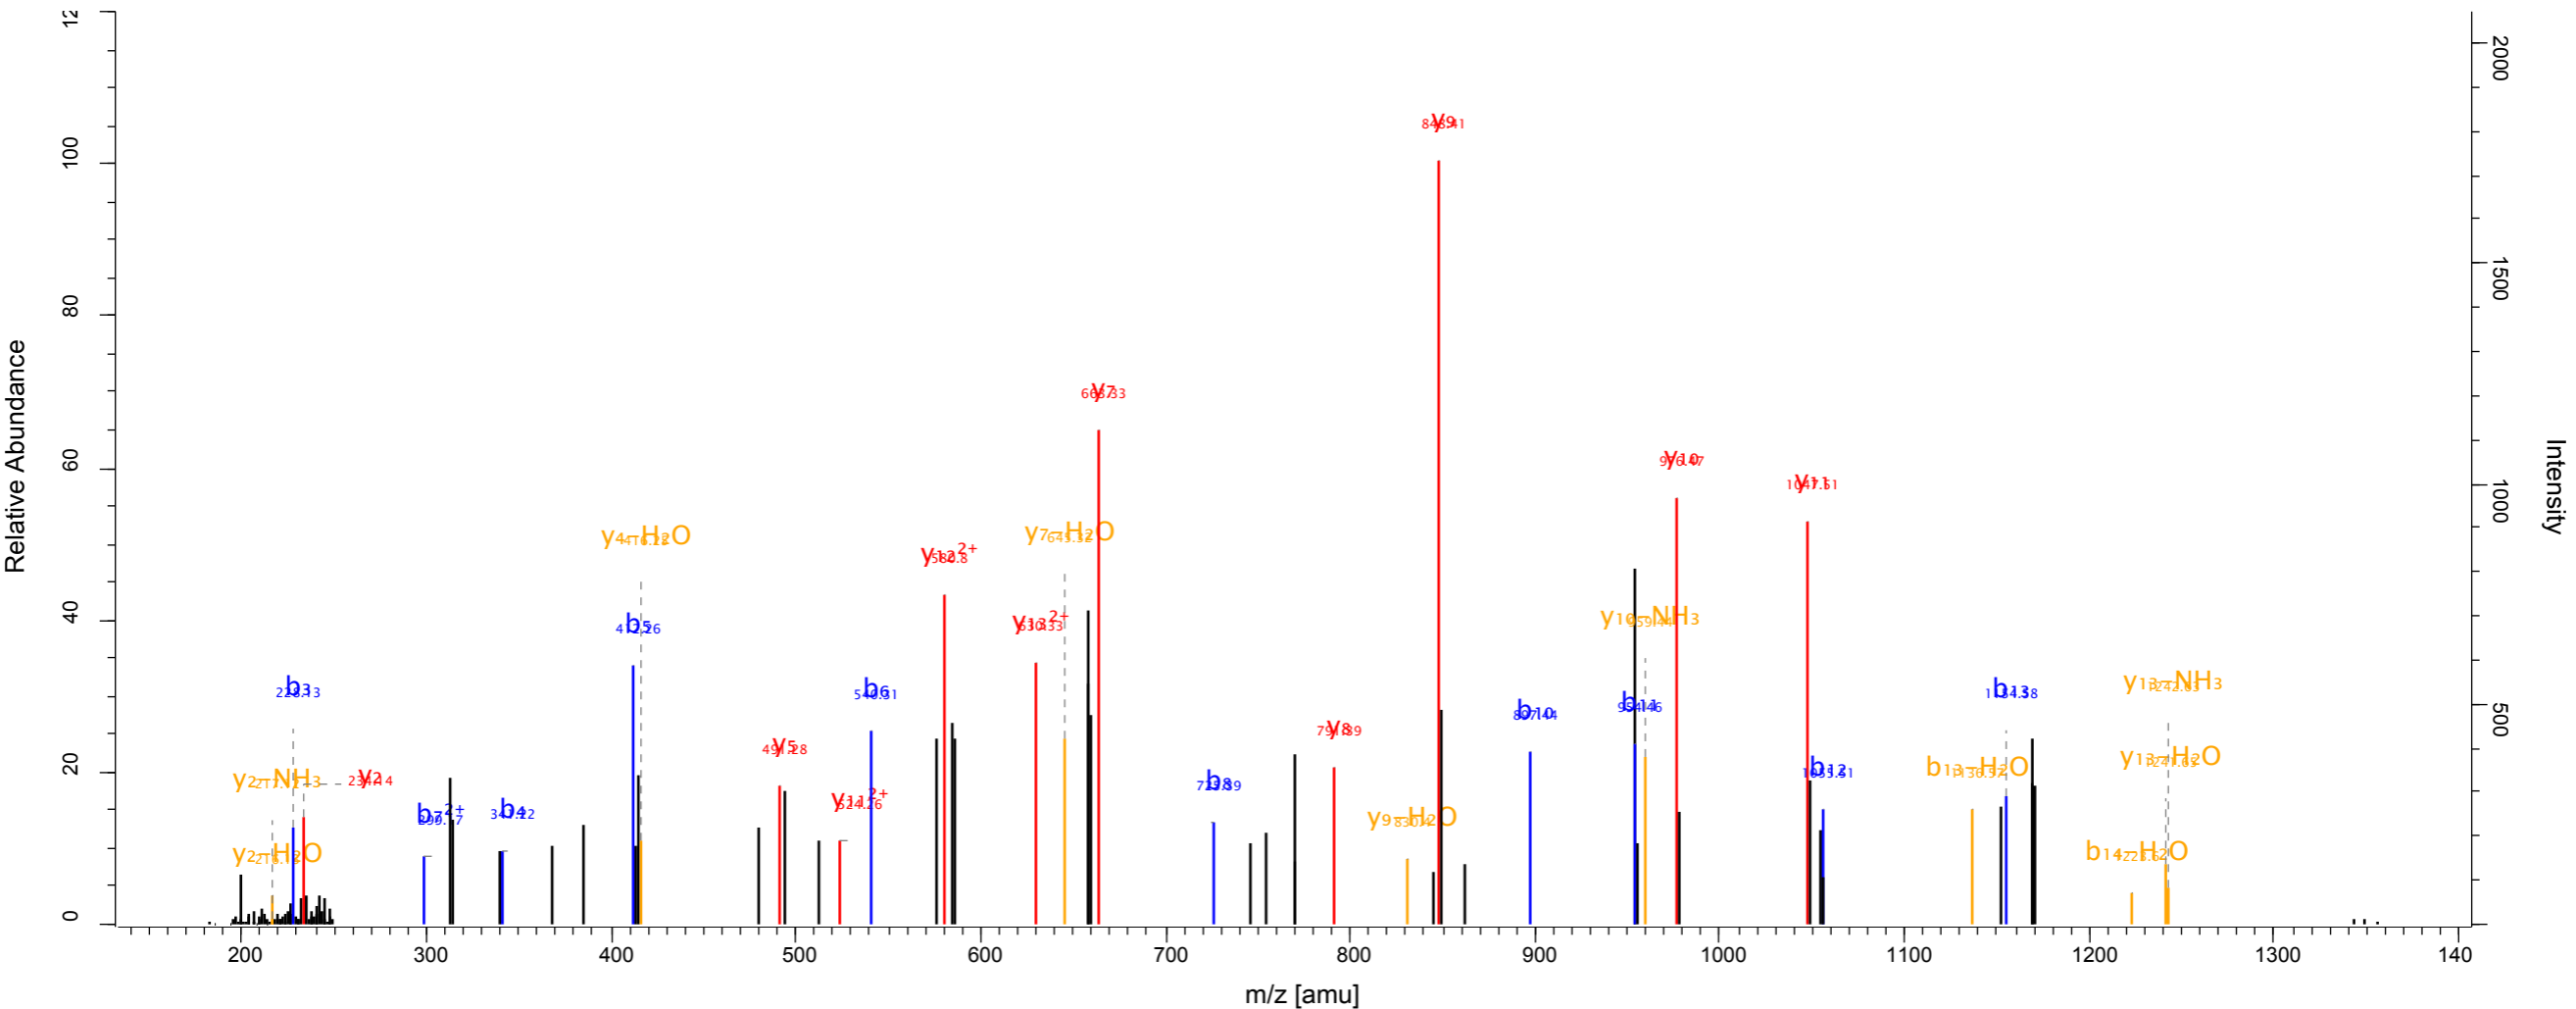

|             |           |          |                                       |
|-------------|-----------|----------|---------------------------------------|
| Scan number | 5798      | Raw file | SKaraca_LMB_Reverse_H3_161011_10_rep2 |
| Method      | ITMS; CID | Pepti... | 145.29                                |

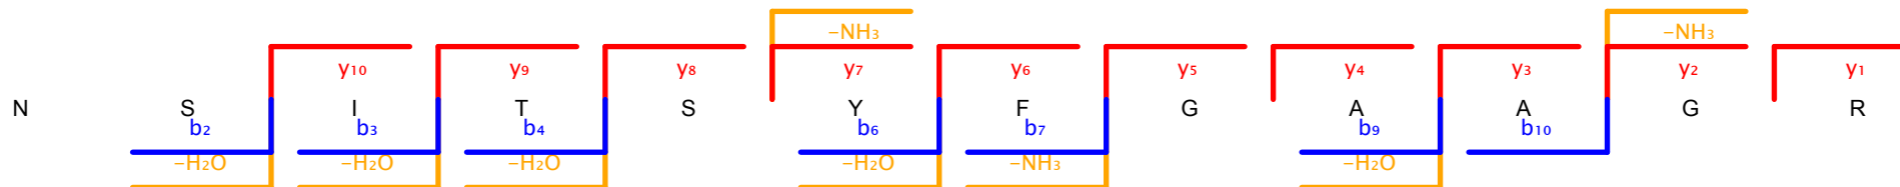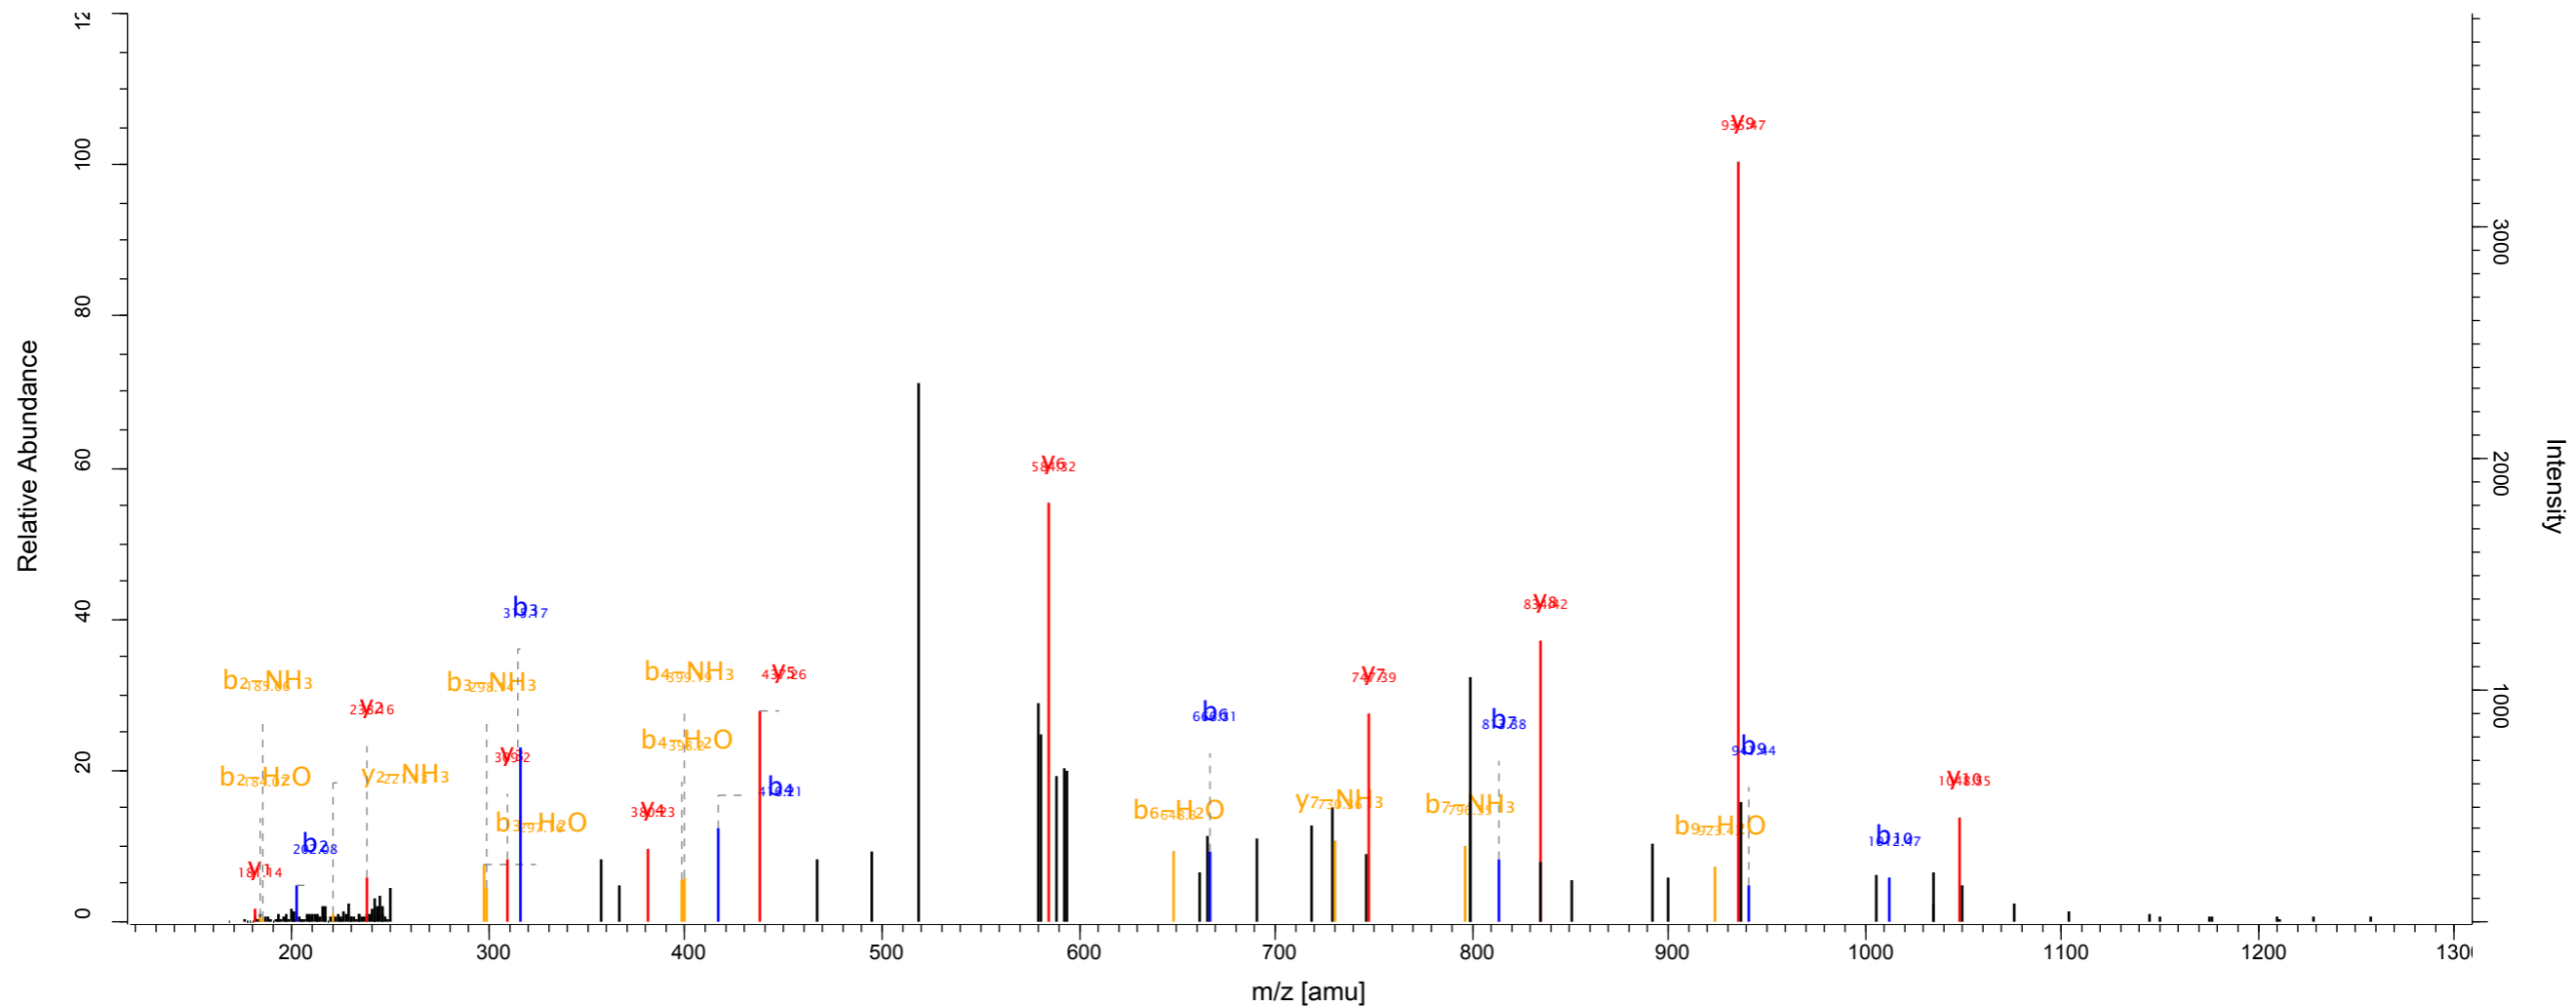

|             |           |          |                                       |
|-------------|-----------|----------|---------------------------------------|
| Scan number | 7910      | Raw file | SKaraca_LMB_Reverse_H3_161011_11_rep1 |
| Method      | ITMS; CID | Pepti... | 92.93                                 |

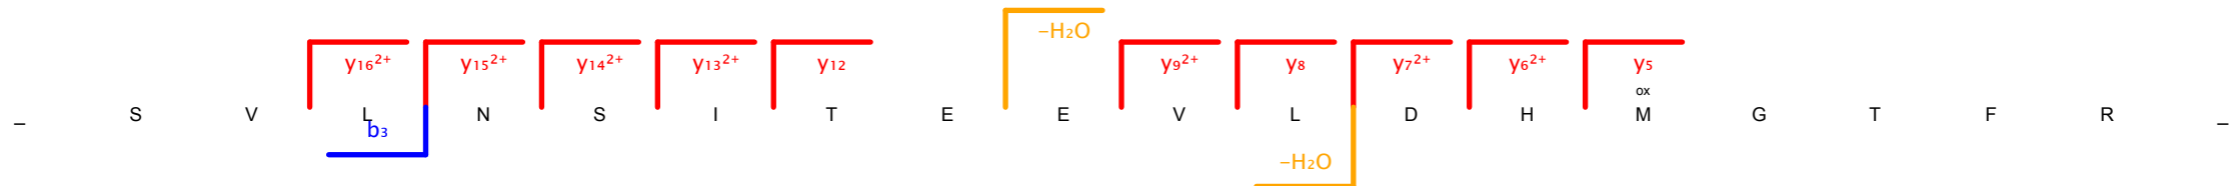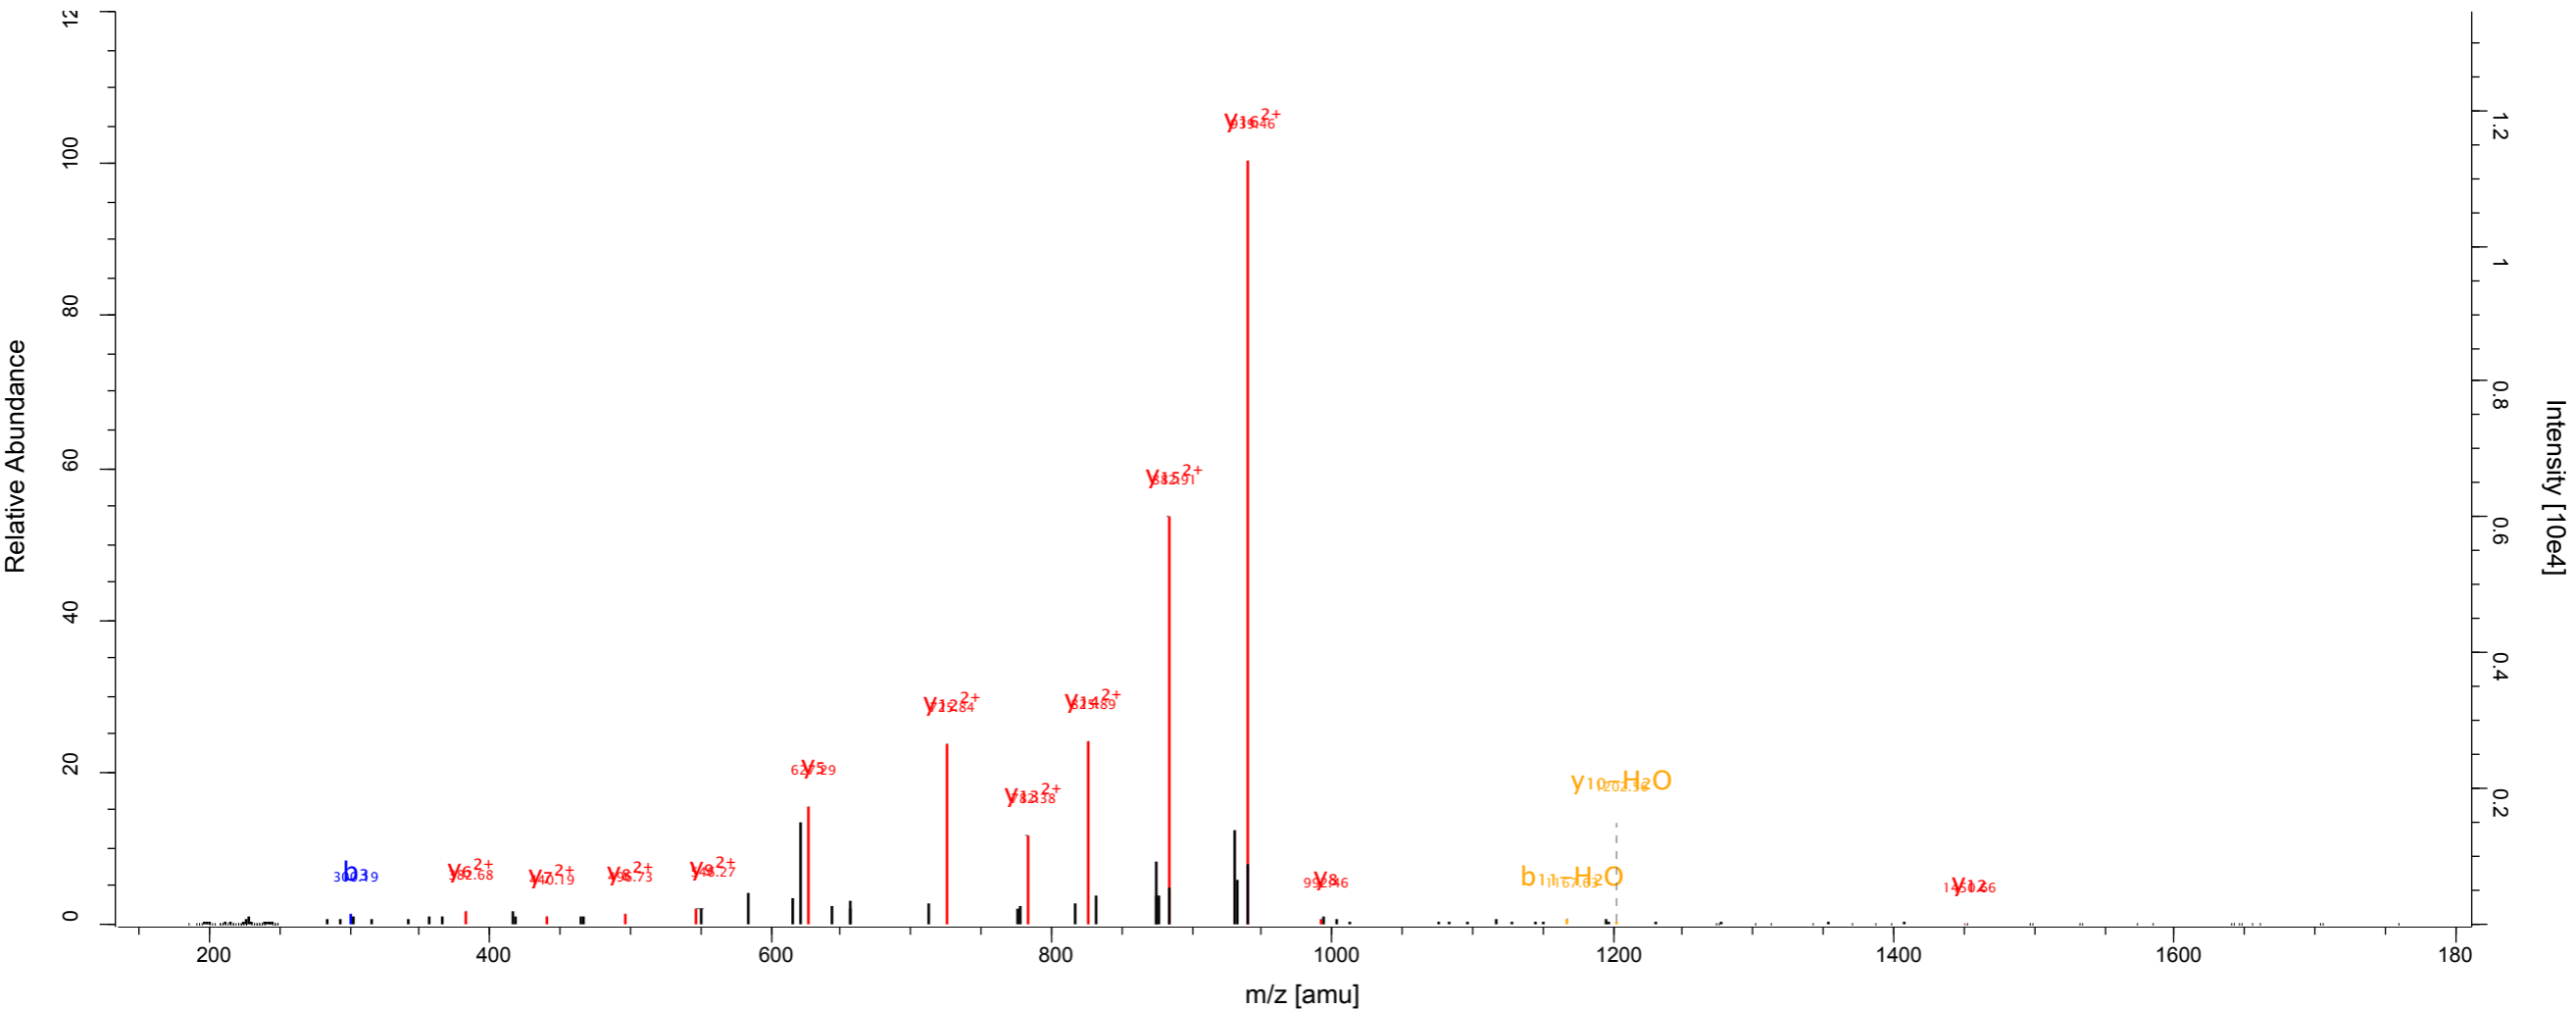

Scan number 3985 Raw file SKaraca\_LMB\_Reverse\_H3\_161011\_12\_rep2  
 Method ITMS; CID Pepti... 134.99

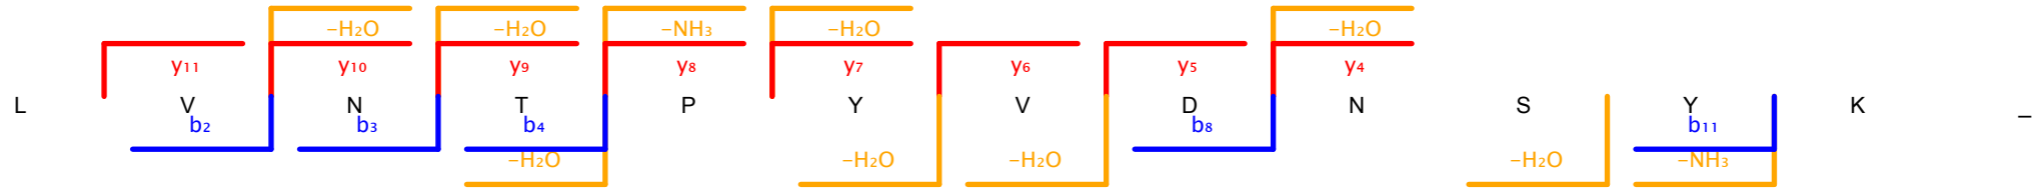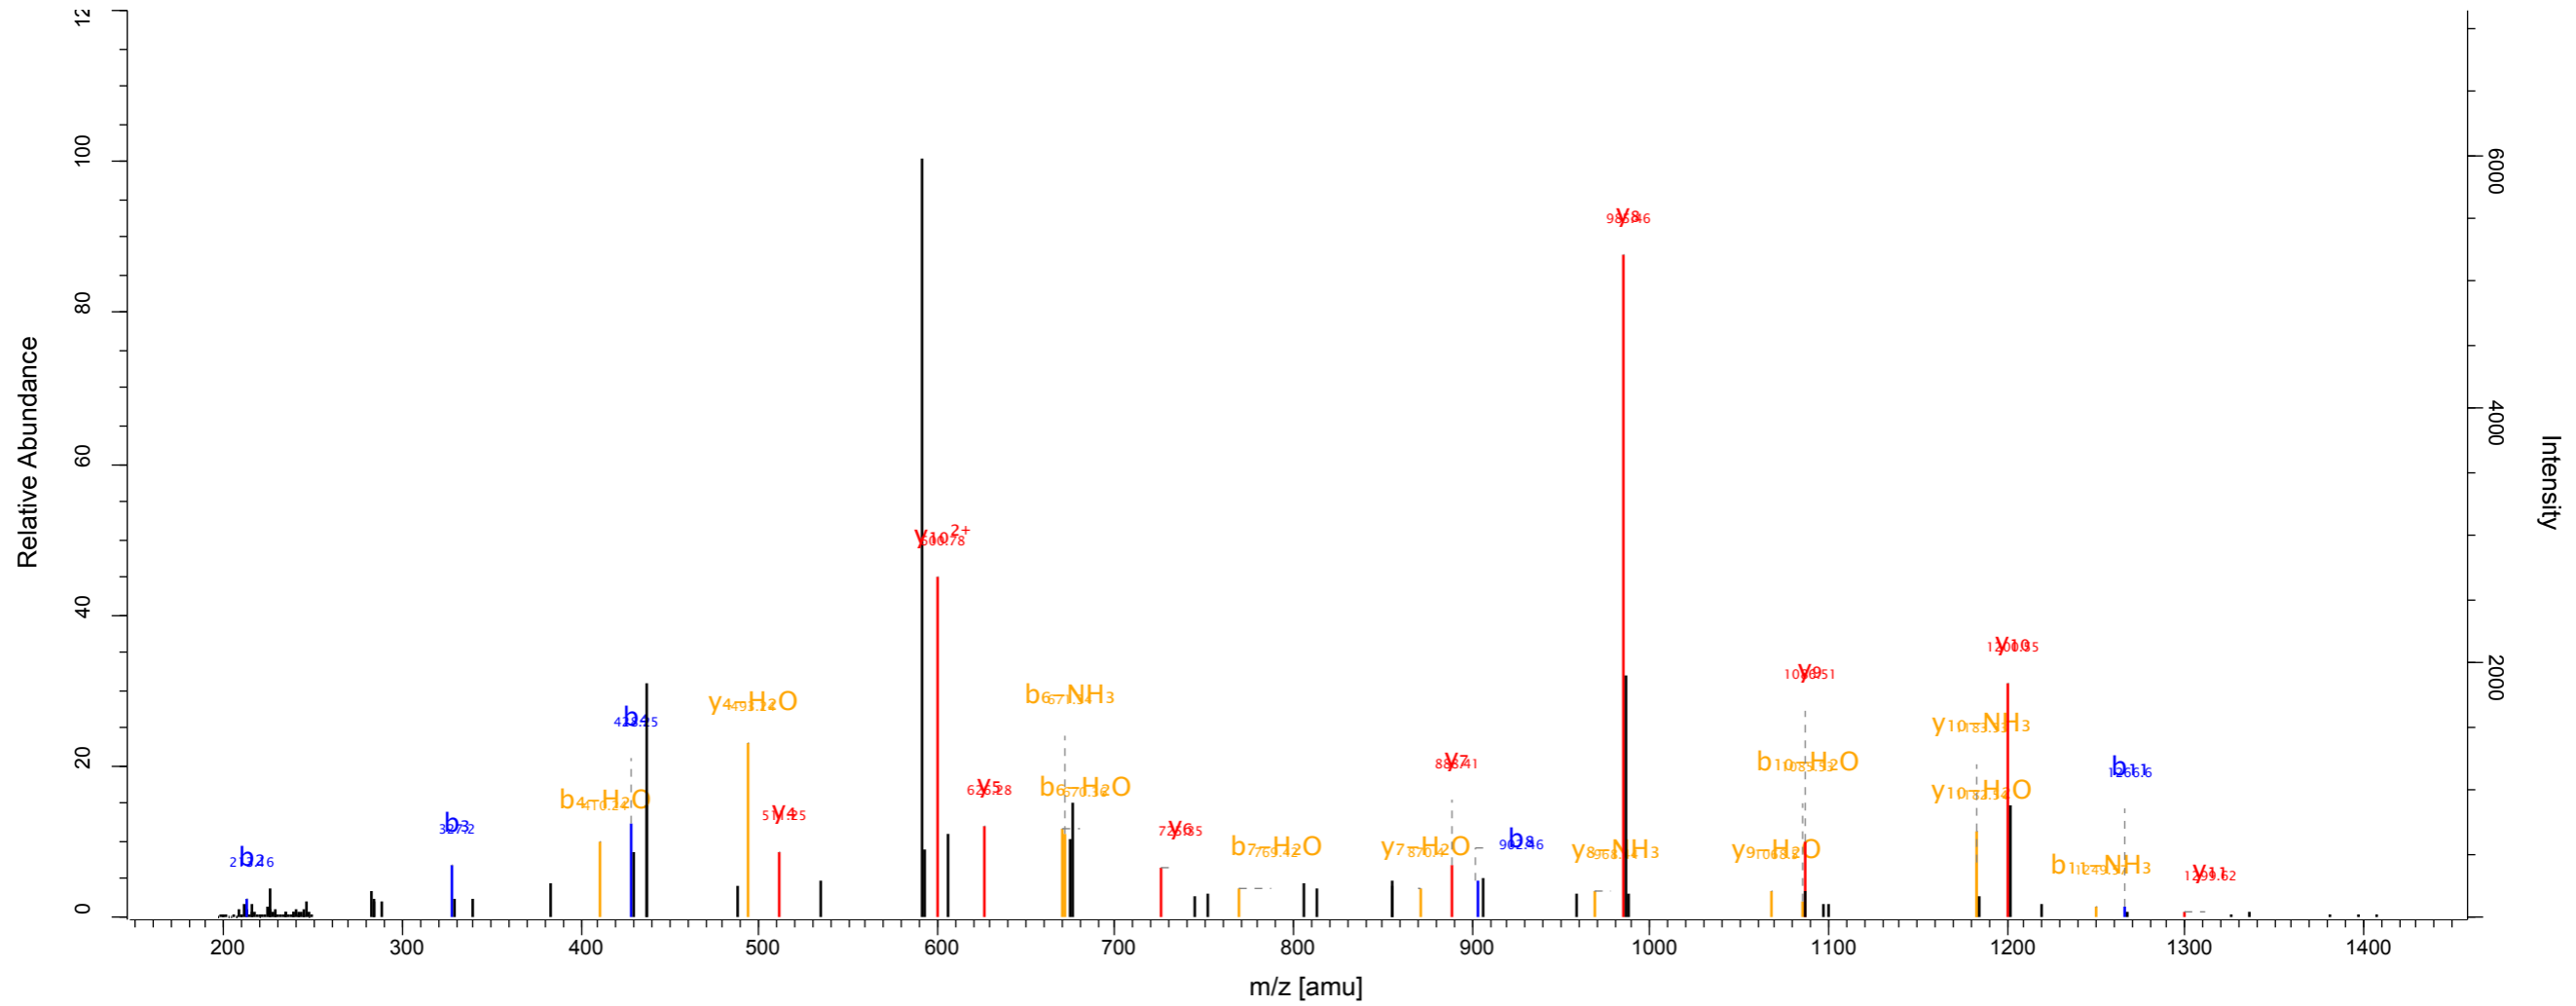



Scan number 4035 Raw file SKaraca\_LMB\_Reverse\_H3\_161011\_12\_rep2  
 Method ITMS; CID Pepti... 161.04

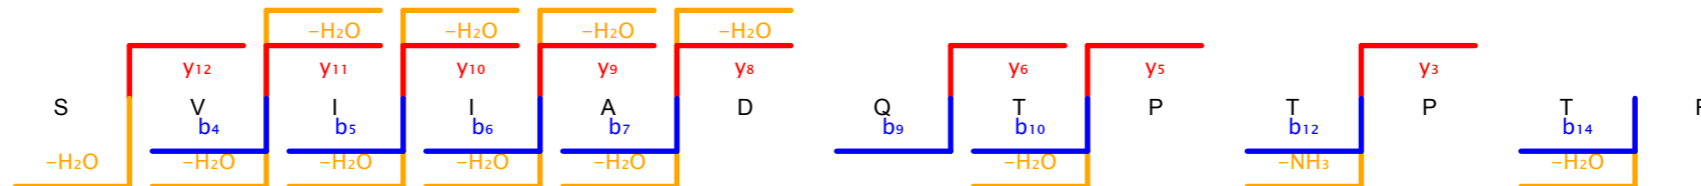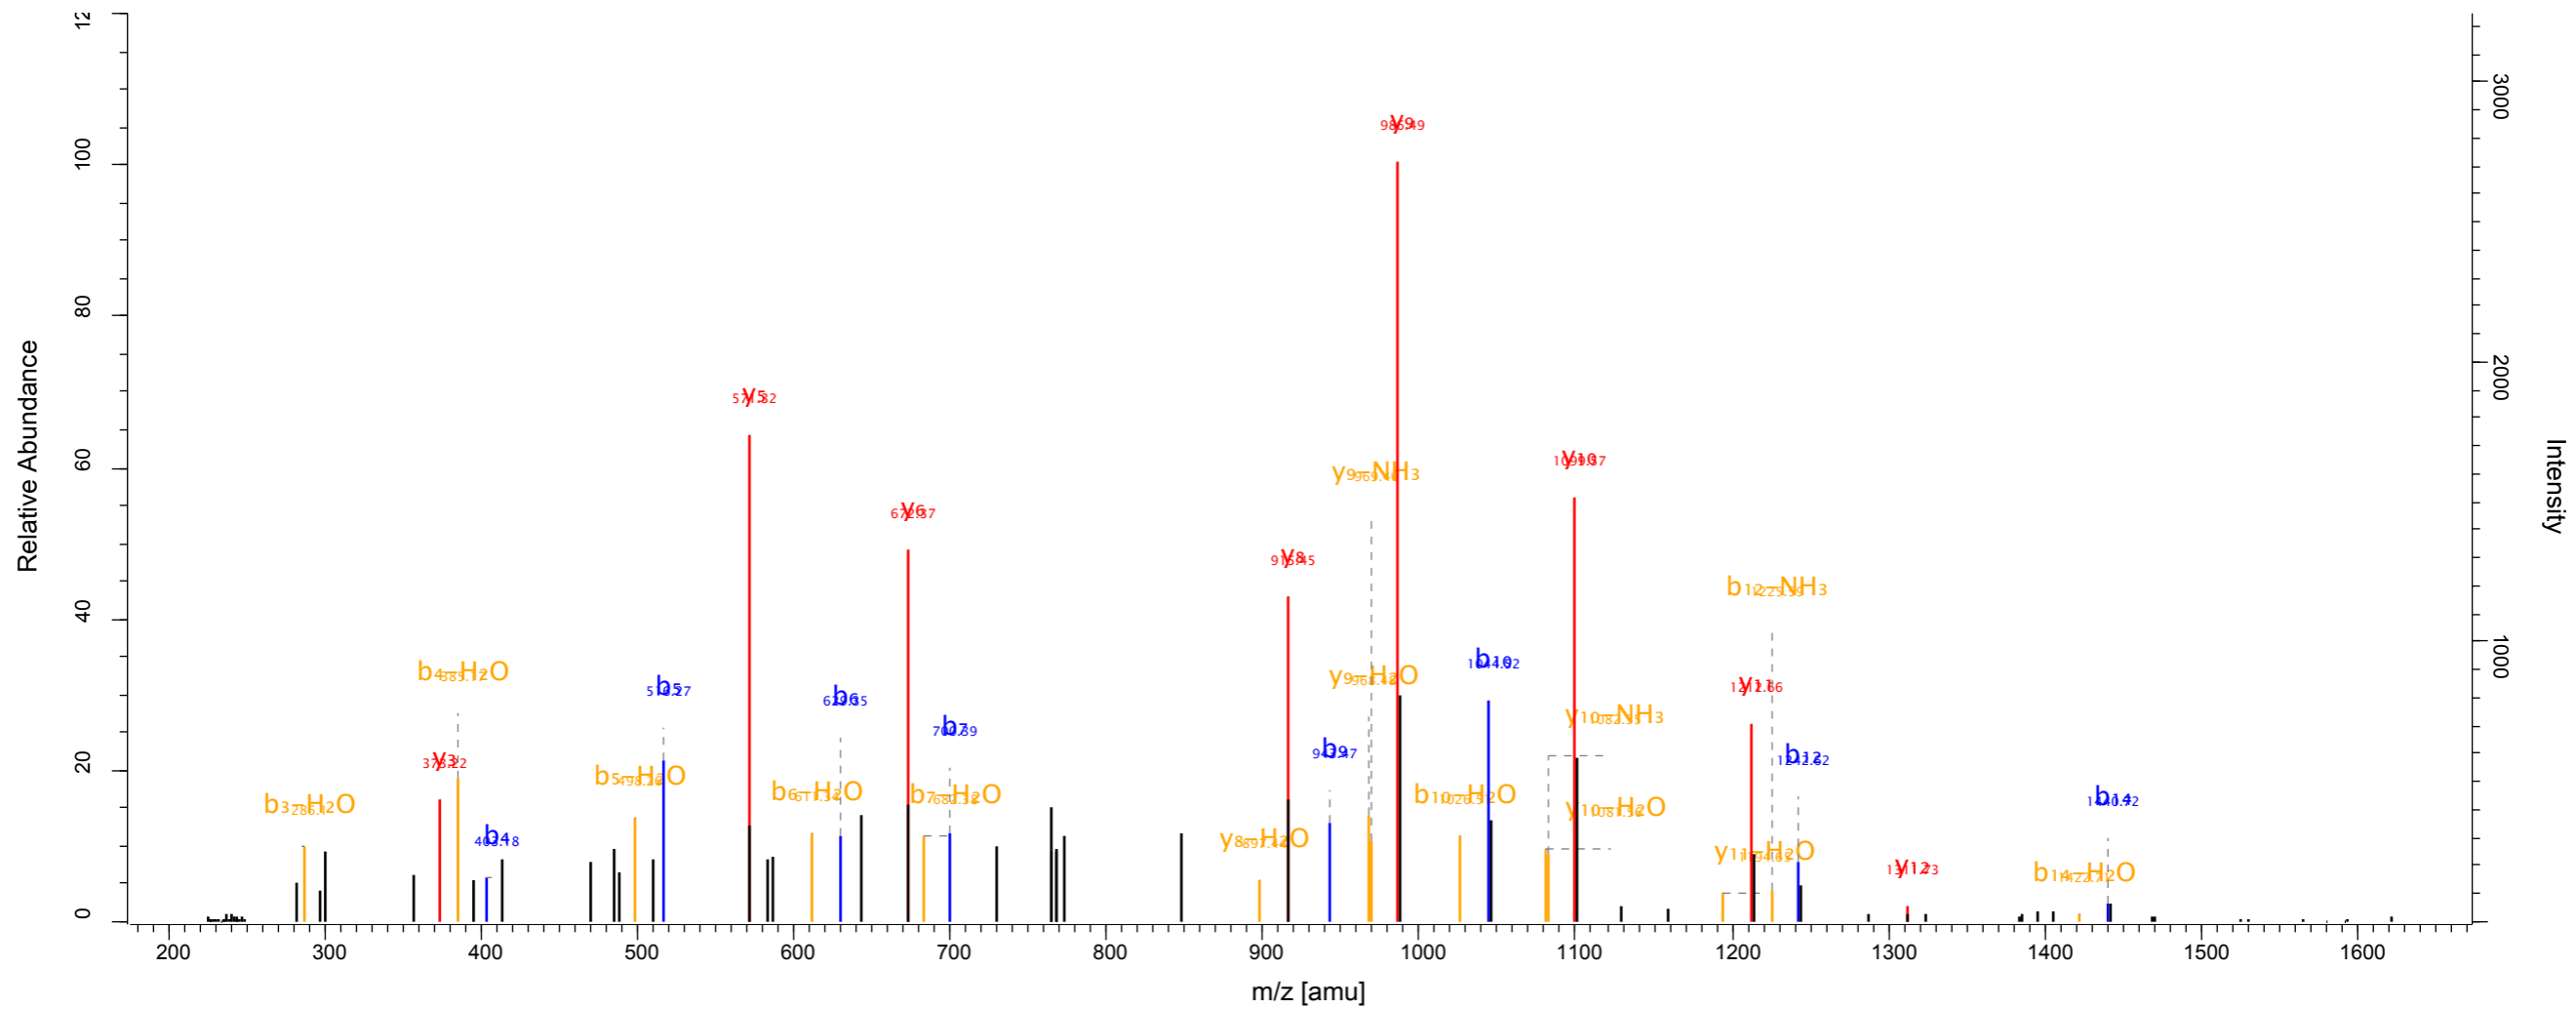

Scan number 7353 Raw file SKaraca\_LMB\_Reverse\_H3\_161011\_13\_rep1  
 Method ITMS; CID Pepti... 163.41

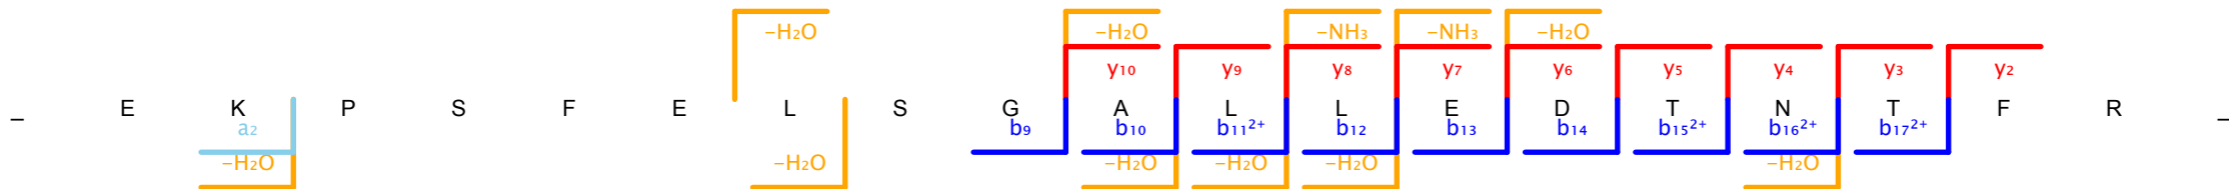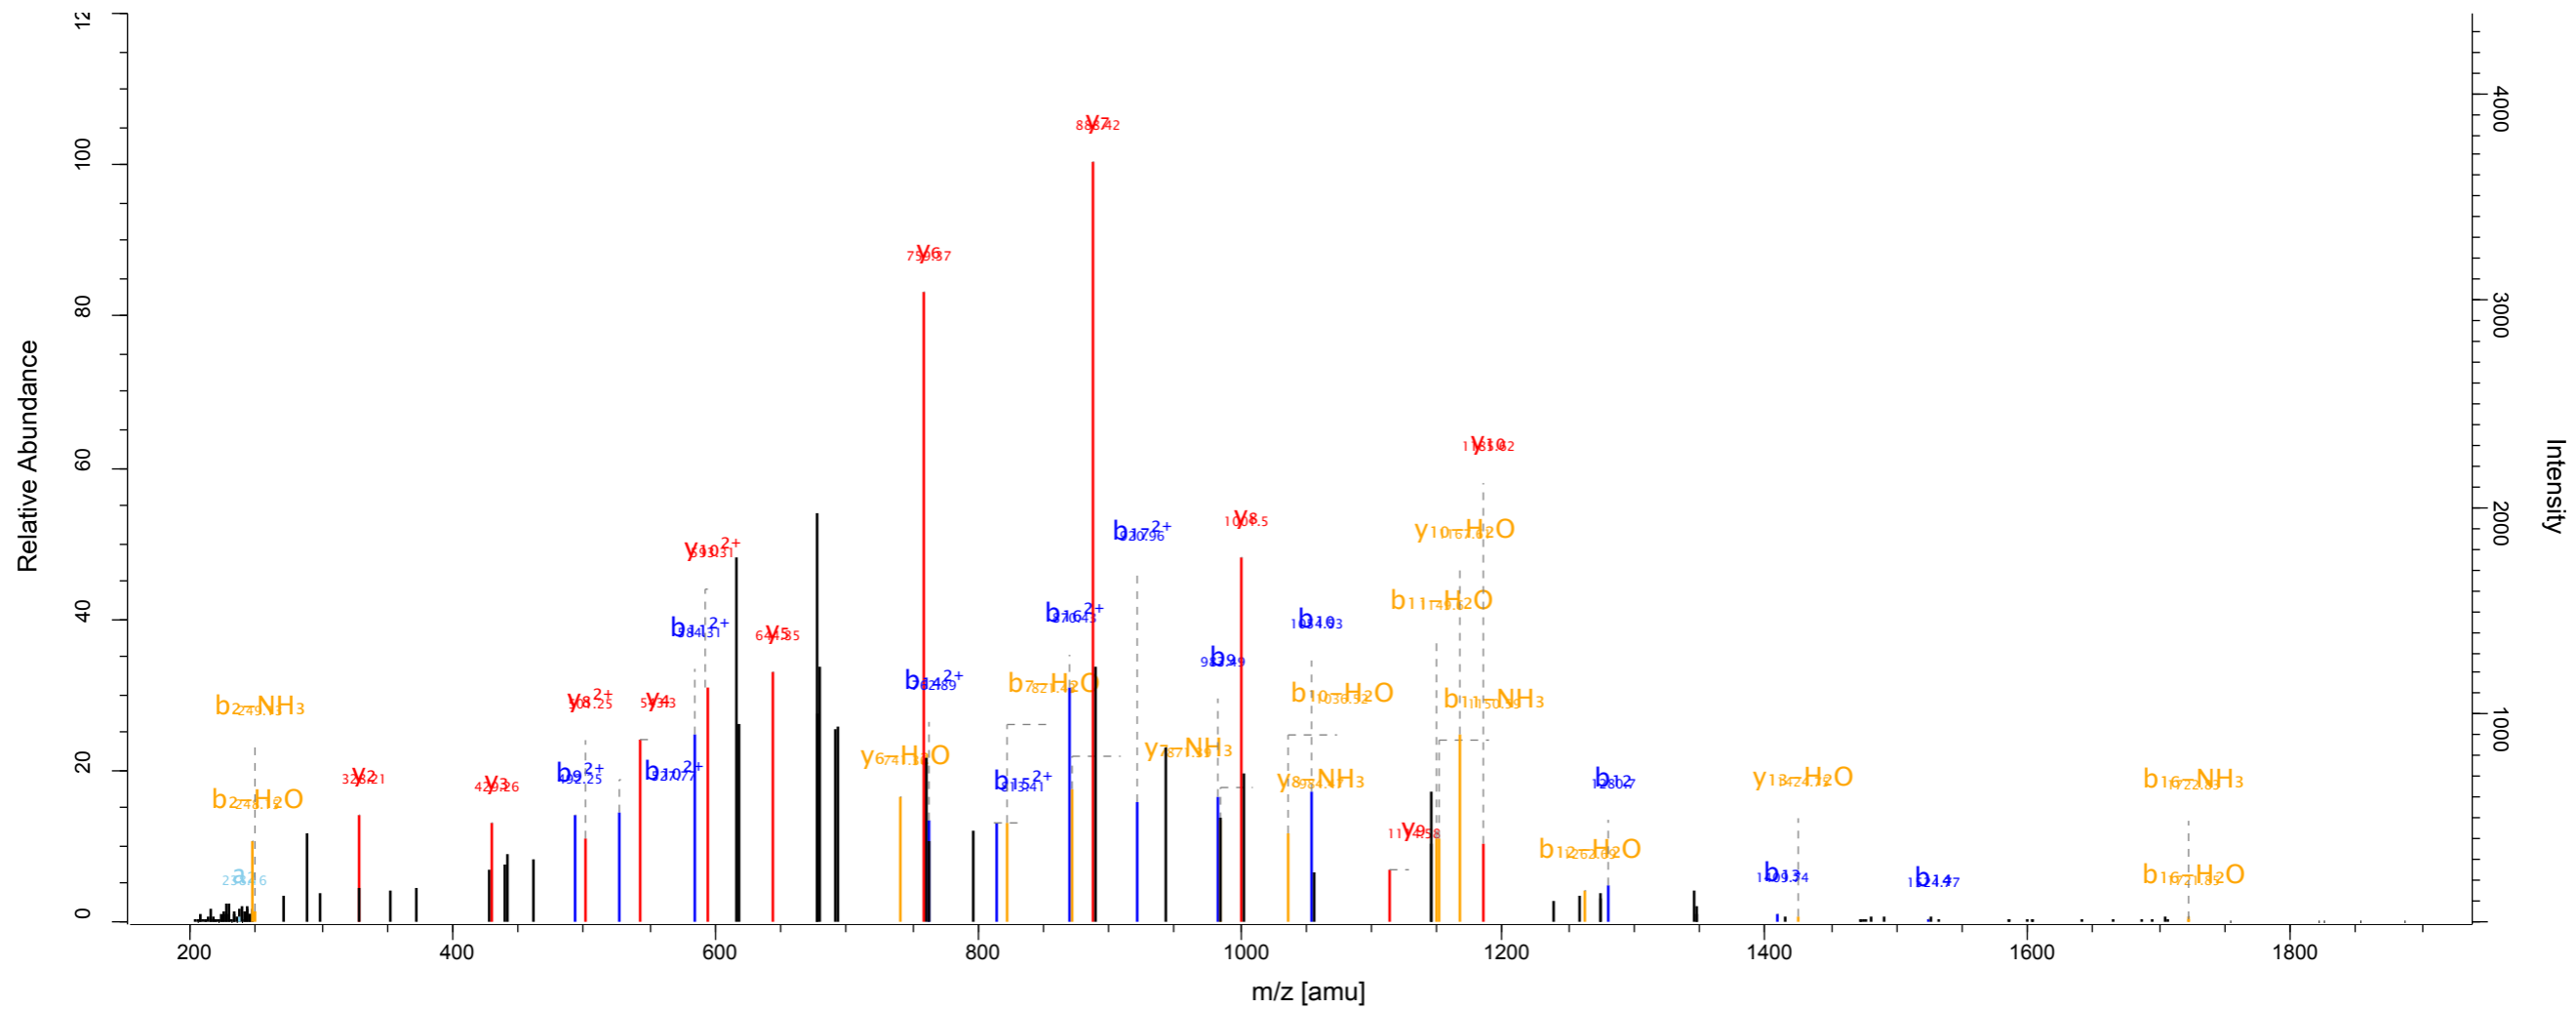

Scan number 2976 Raw file SKaraca\_LMB\_Reverse\_H3\_161011\_14\_rep1  
 Method ITMS; CID Pepti... 135.55

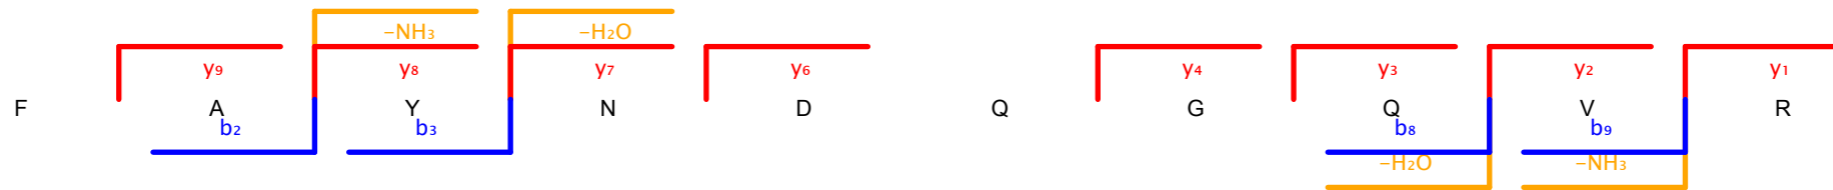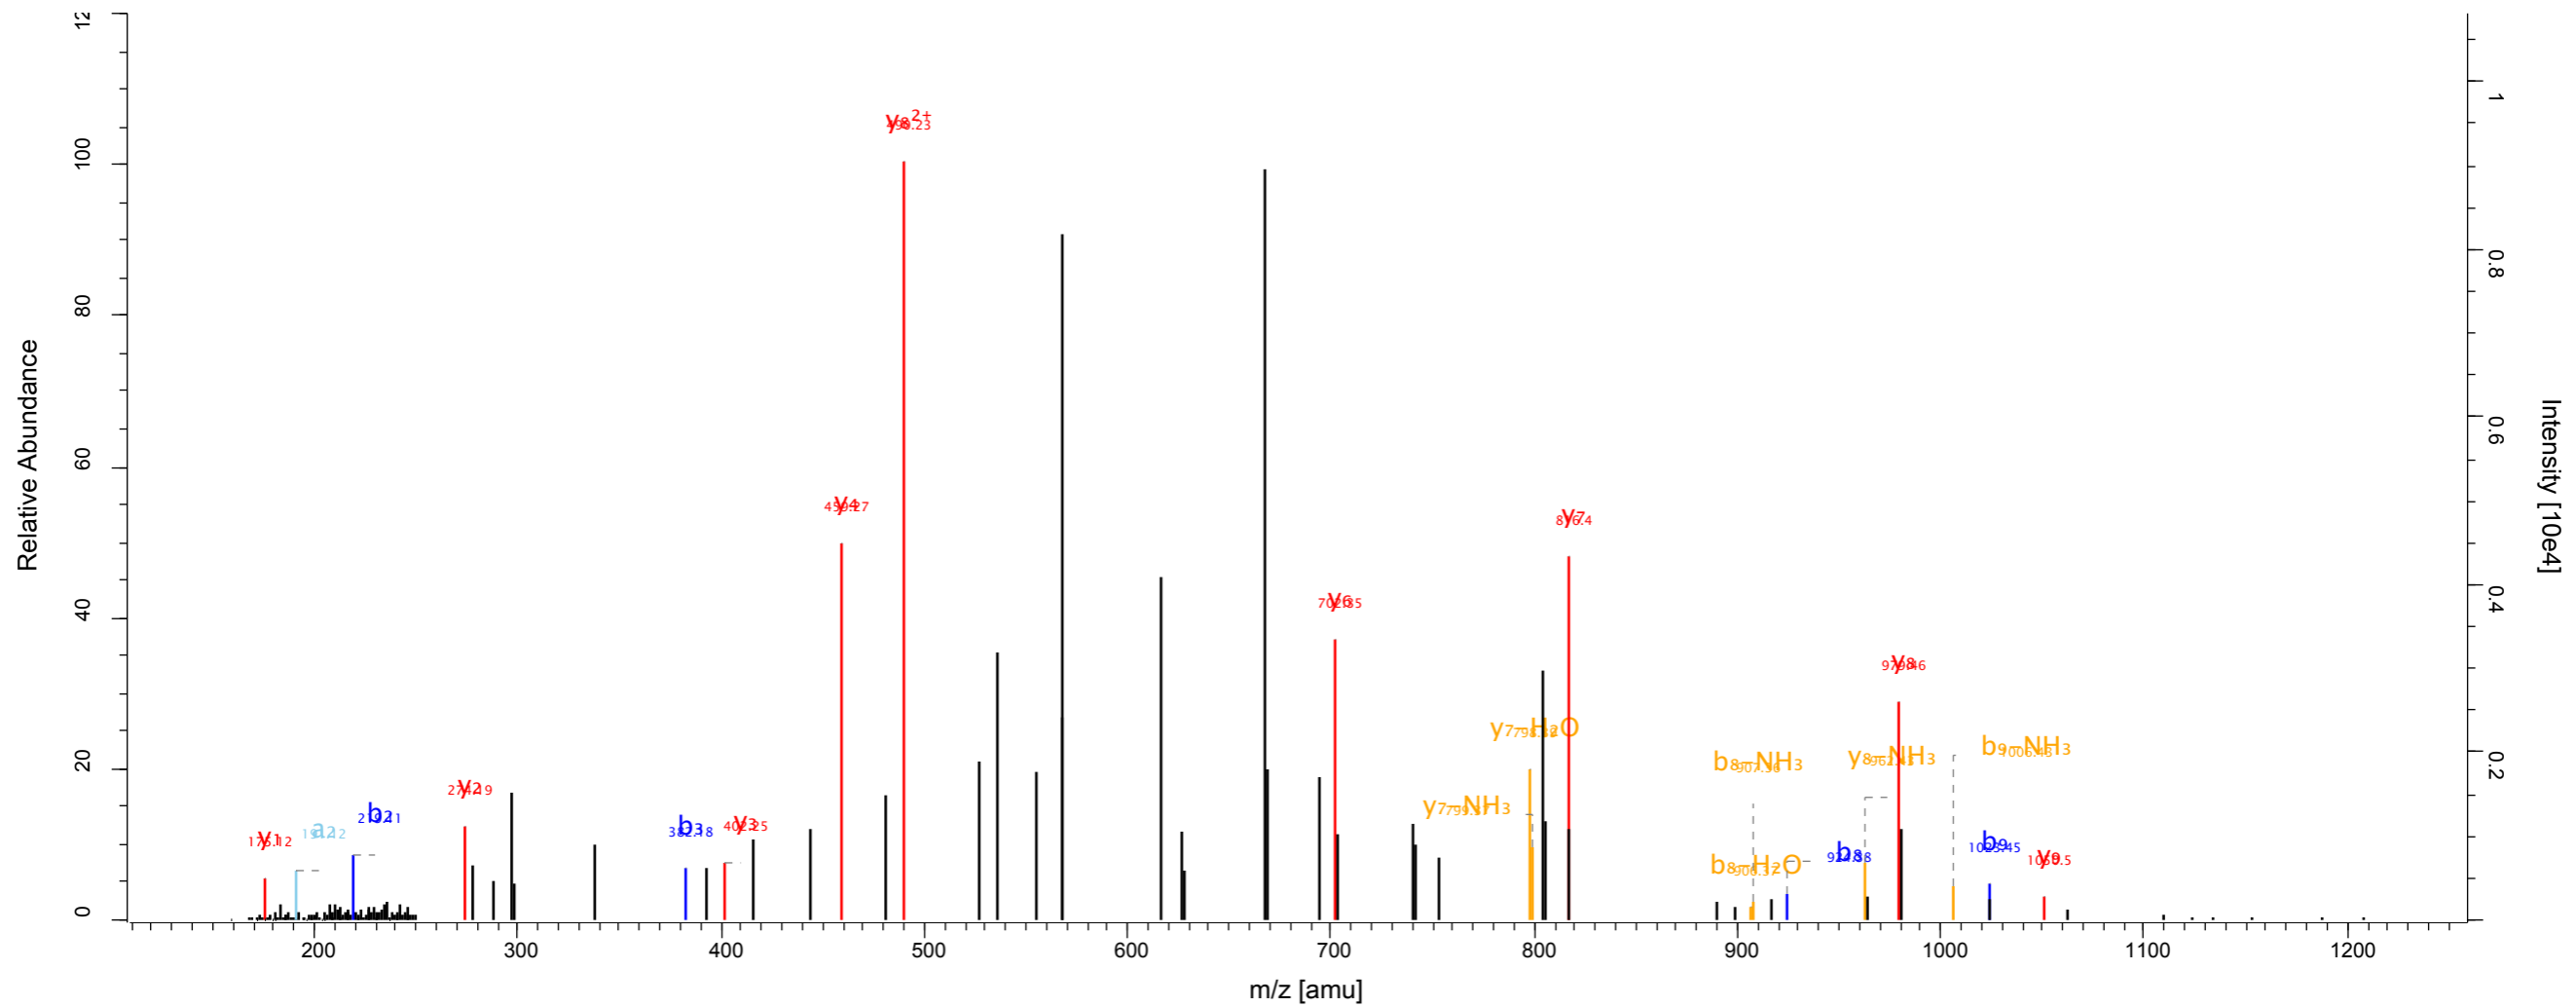

Scan number 8440 Raw file SKaraca\_LMB\_Reverse\_H3\_161011\_14\_rep1  
 Method ITMS; CID Pepti... 142.1

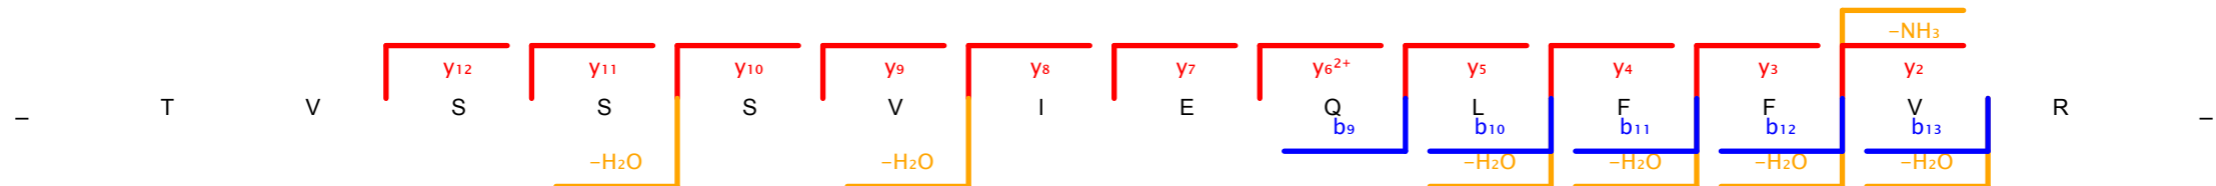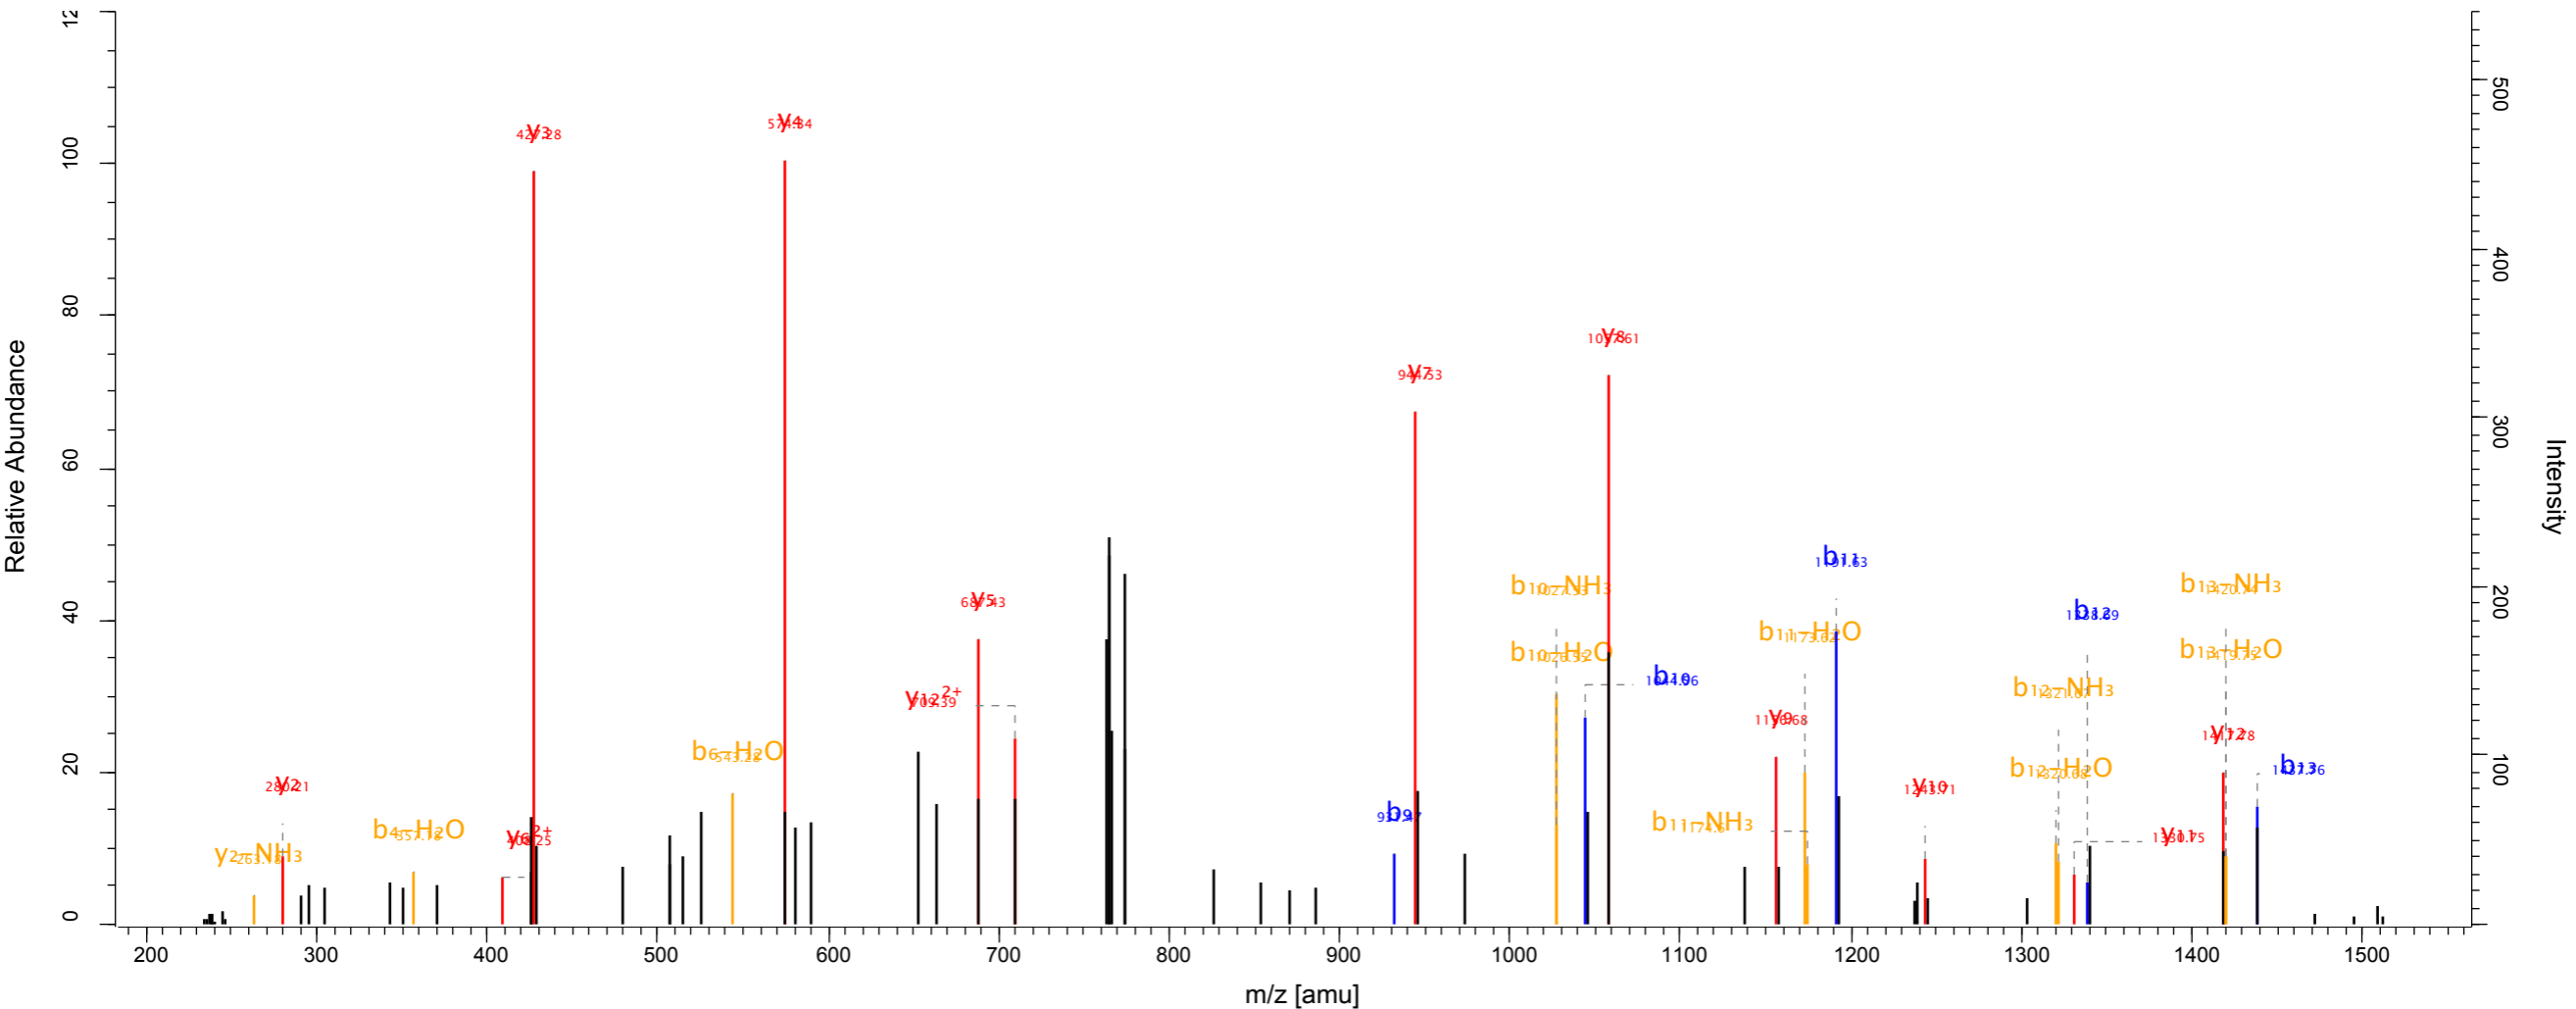

Scan number 2141 Raw file SKaraca\_LMB\_Reverse\_H3\_161011\_14\_rep2  
 Method ITMS; CID Pepti... 150.49

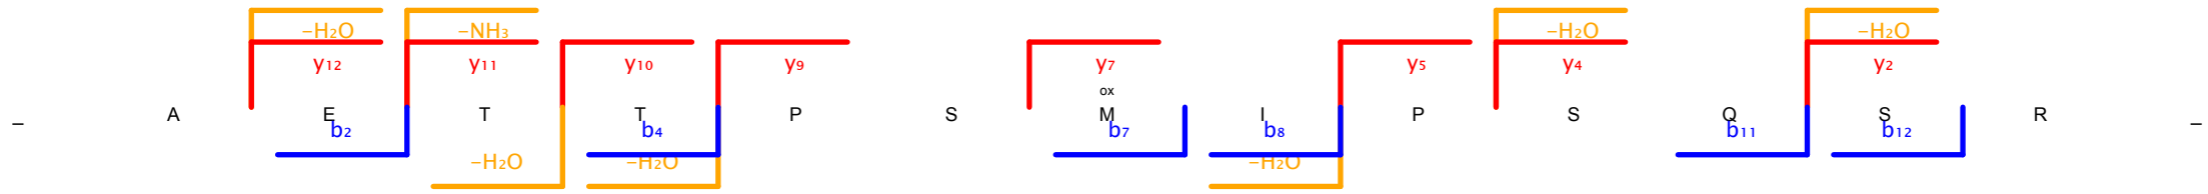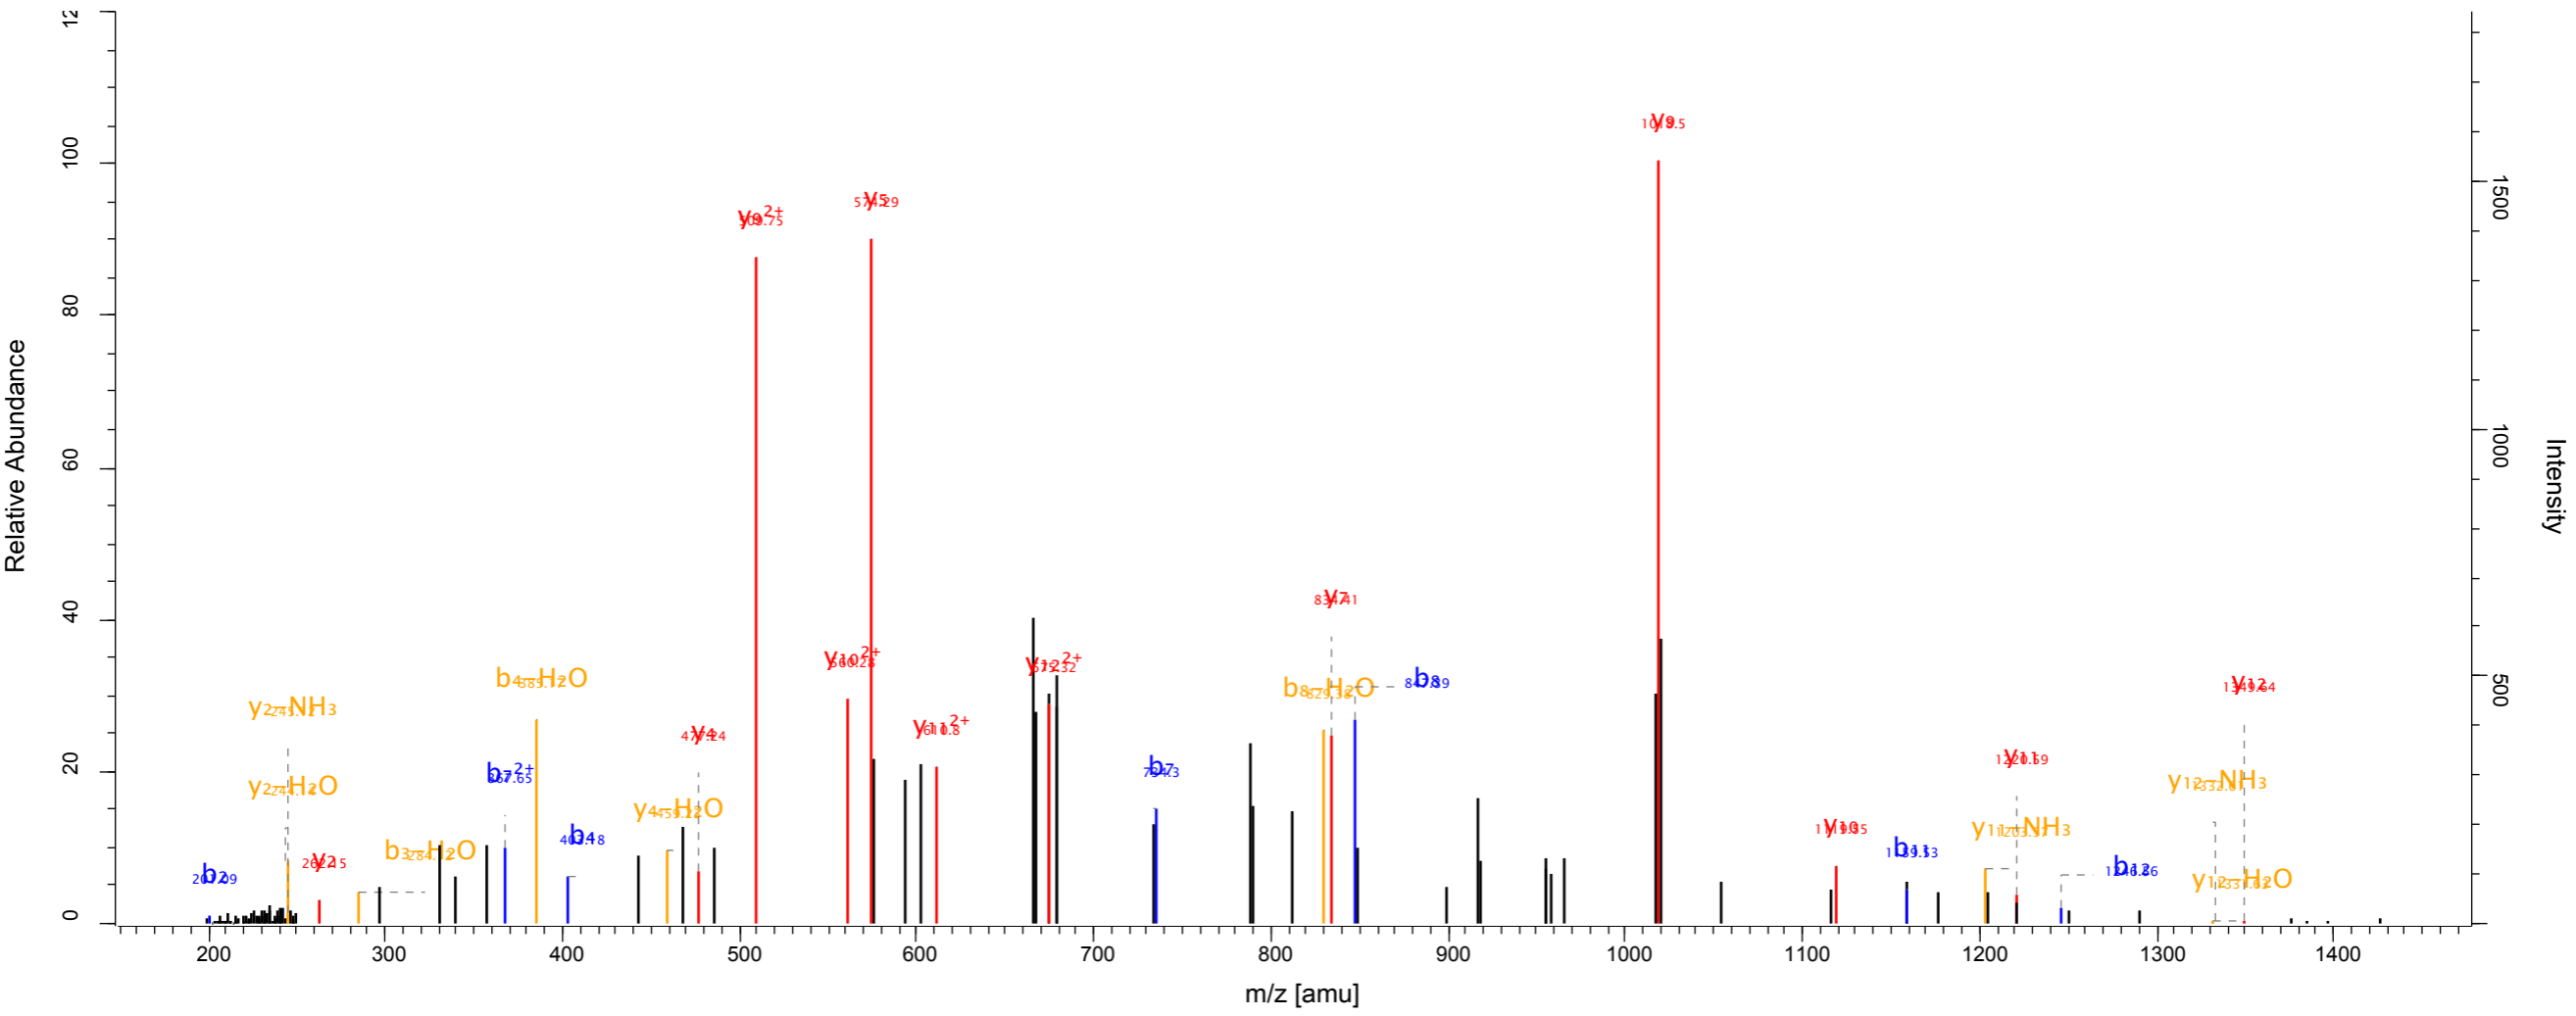

Scan number 3869 Raw file SKaraca\_LMB\_Reverse\_H3\_161011\_15\_rep1  
 Method ITMS; CID Pepti... 149.23

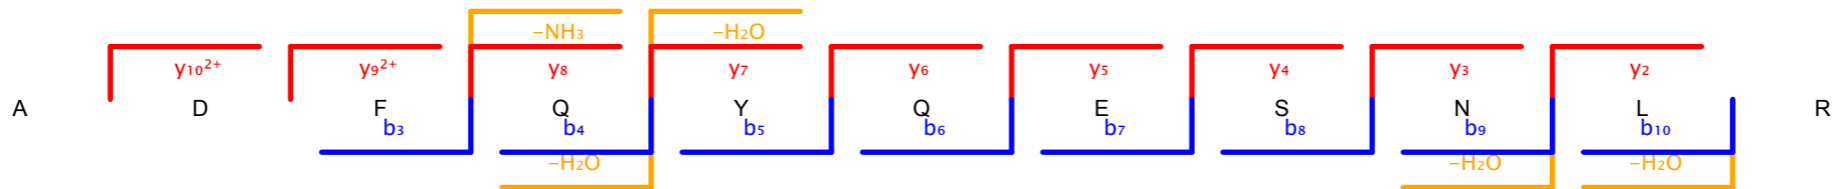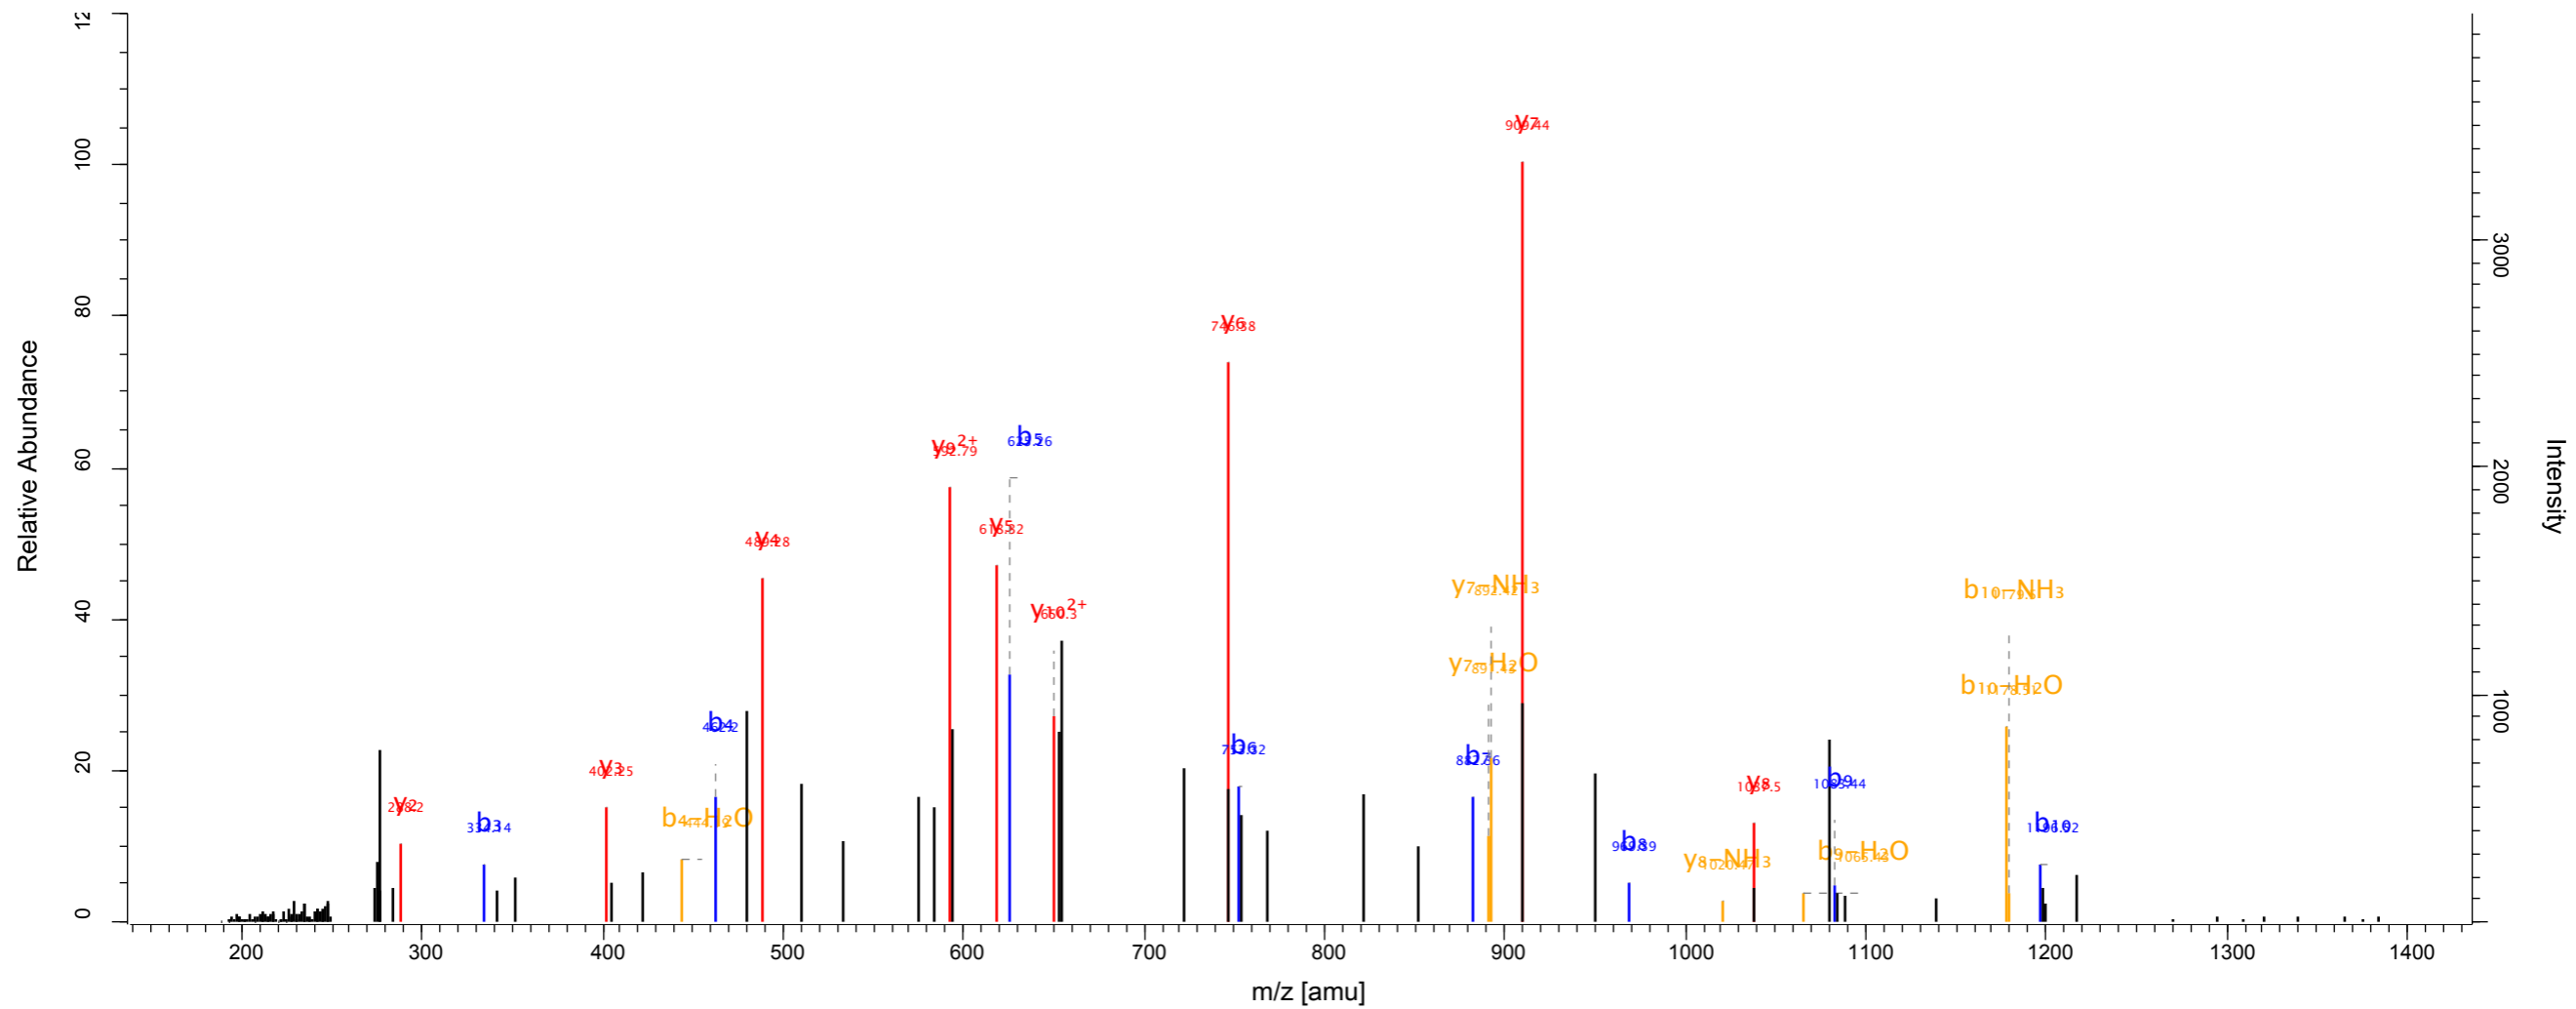

Scan number 7203 Raw file SKaraca\_LMB\_Reverse\_H3\_161011\_15\_rep1  
 Method ITMS; CID Pepti... 234.85

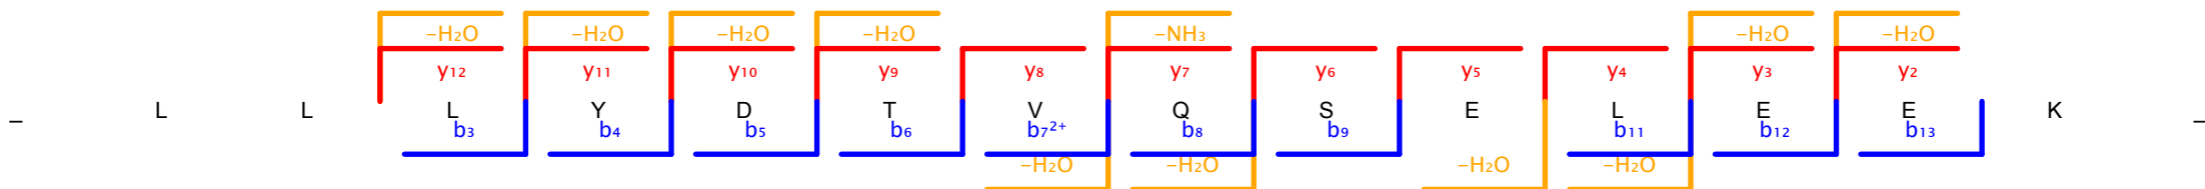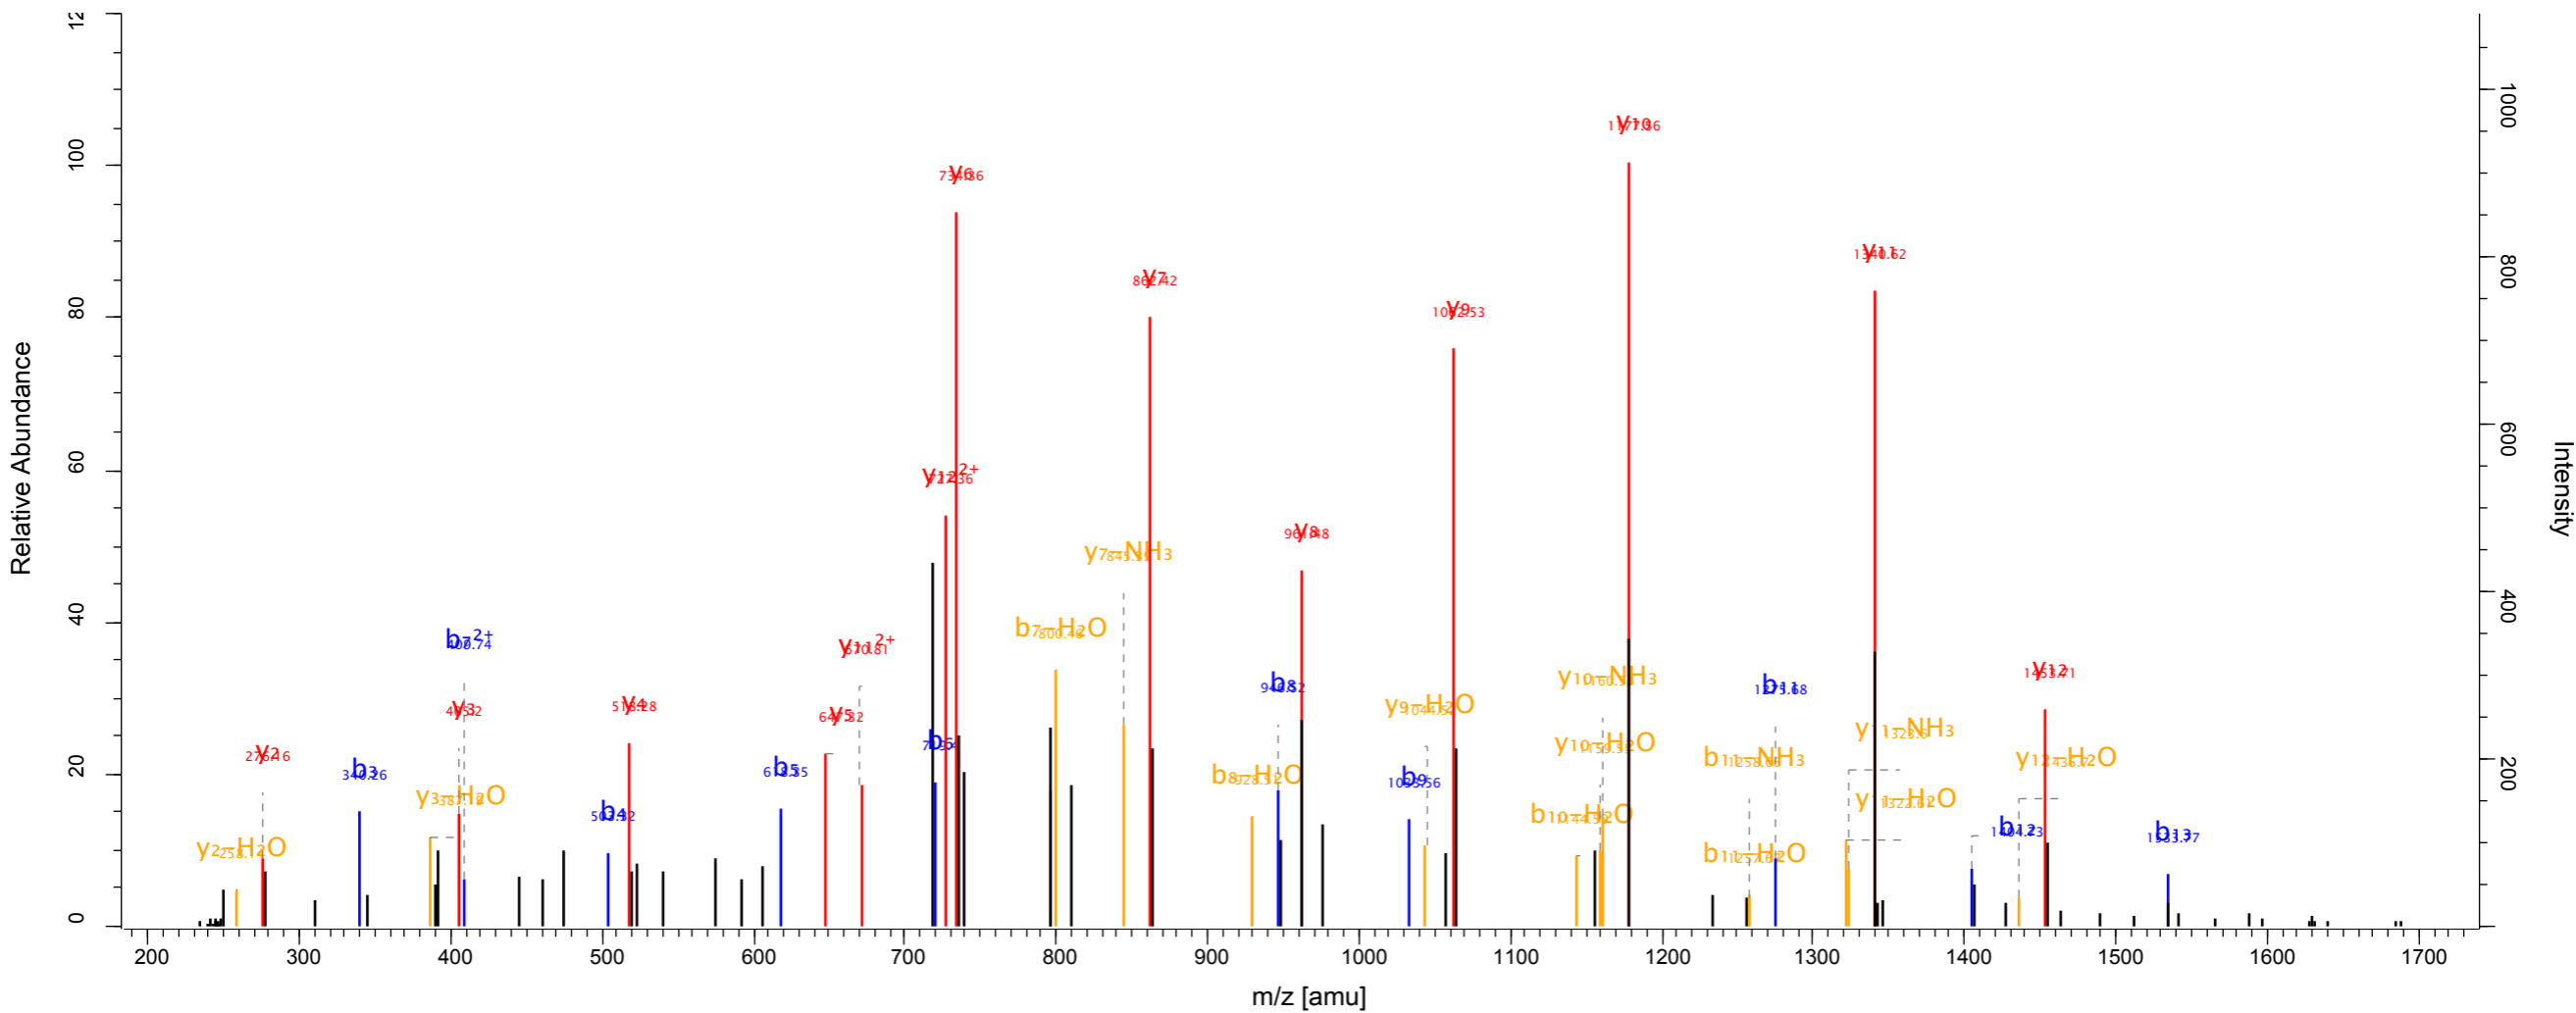

|             |           |          |                                       |
|-------------|-----------|----------|---------------------------------------|
| Scan number | 5738      | Raw file | SKaraca_LMB_Reverse_H3_161011_15_rep2 |
| Method      | ITMS; CID | Pepti... | 78.51                                 |

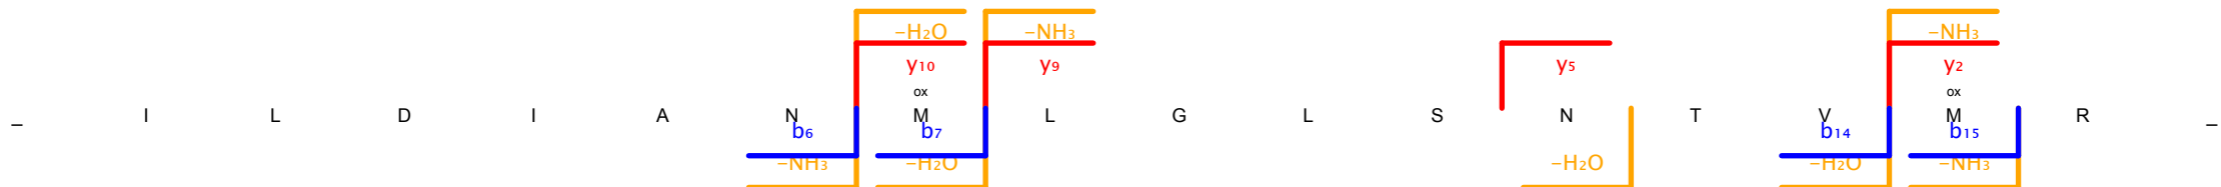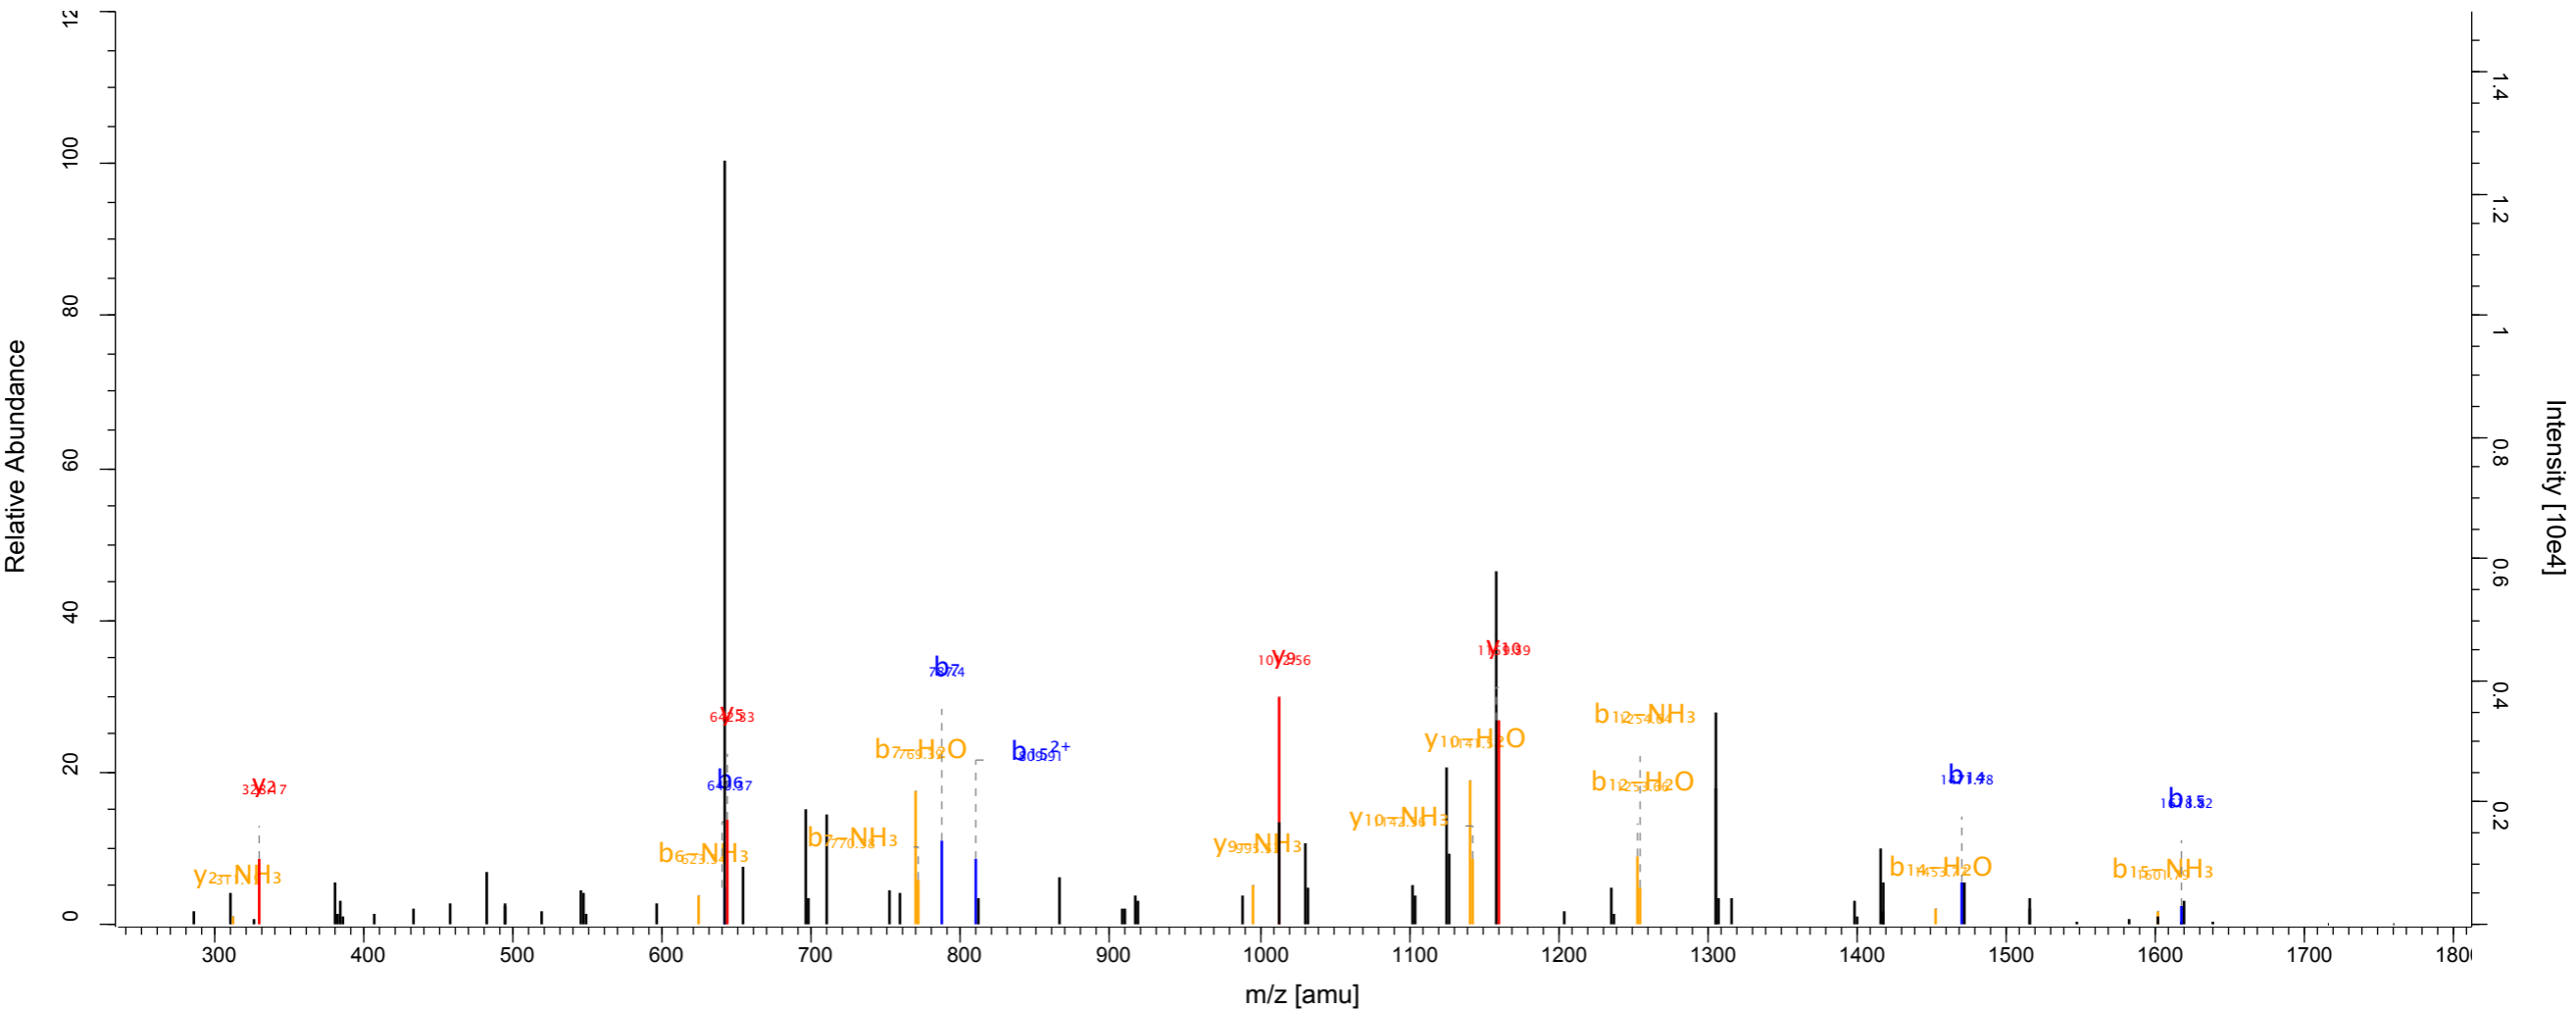



|             |           |          |                                       |
|-------------|-----------|----------|---------------------------------------|
| Scan number | 4384      | Raw file | SKaraca_LMB_Reverse_H3_161011_16_rep1 |
| Method      | ITMS; CID | Pepti... | 138.05                                |

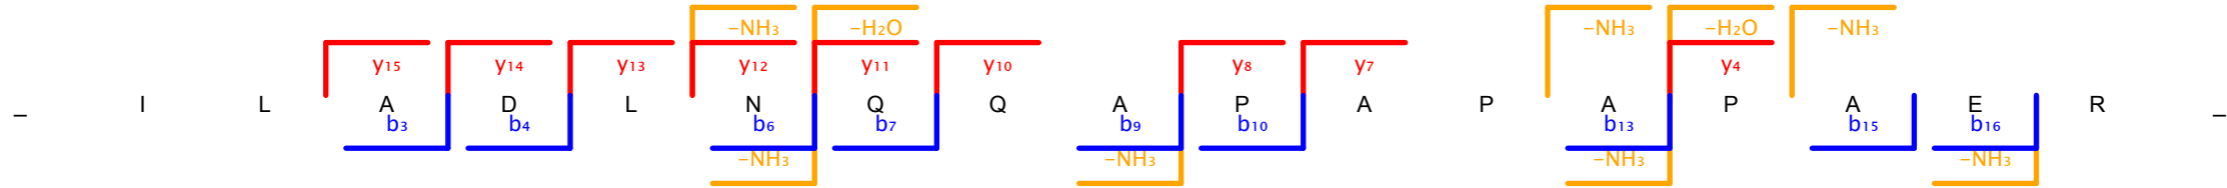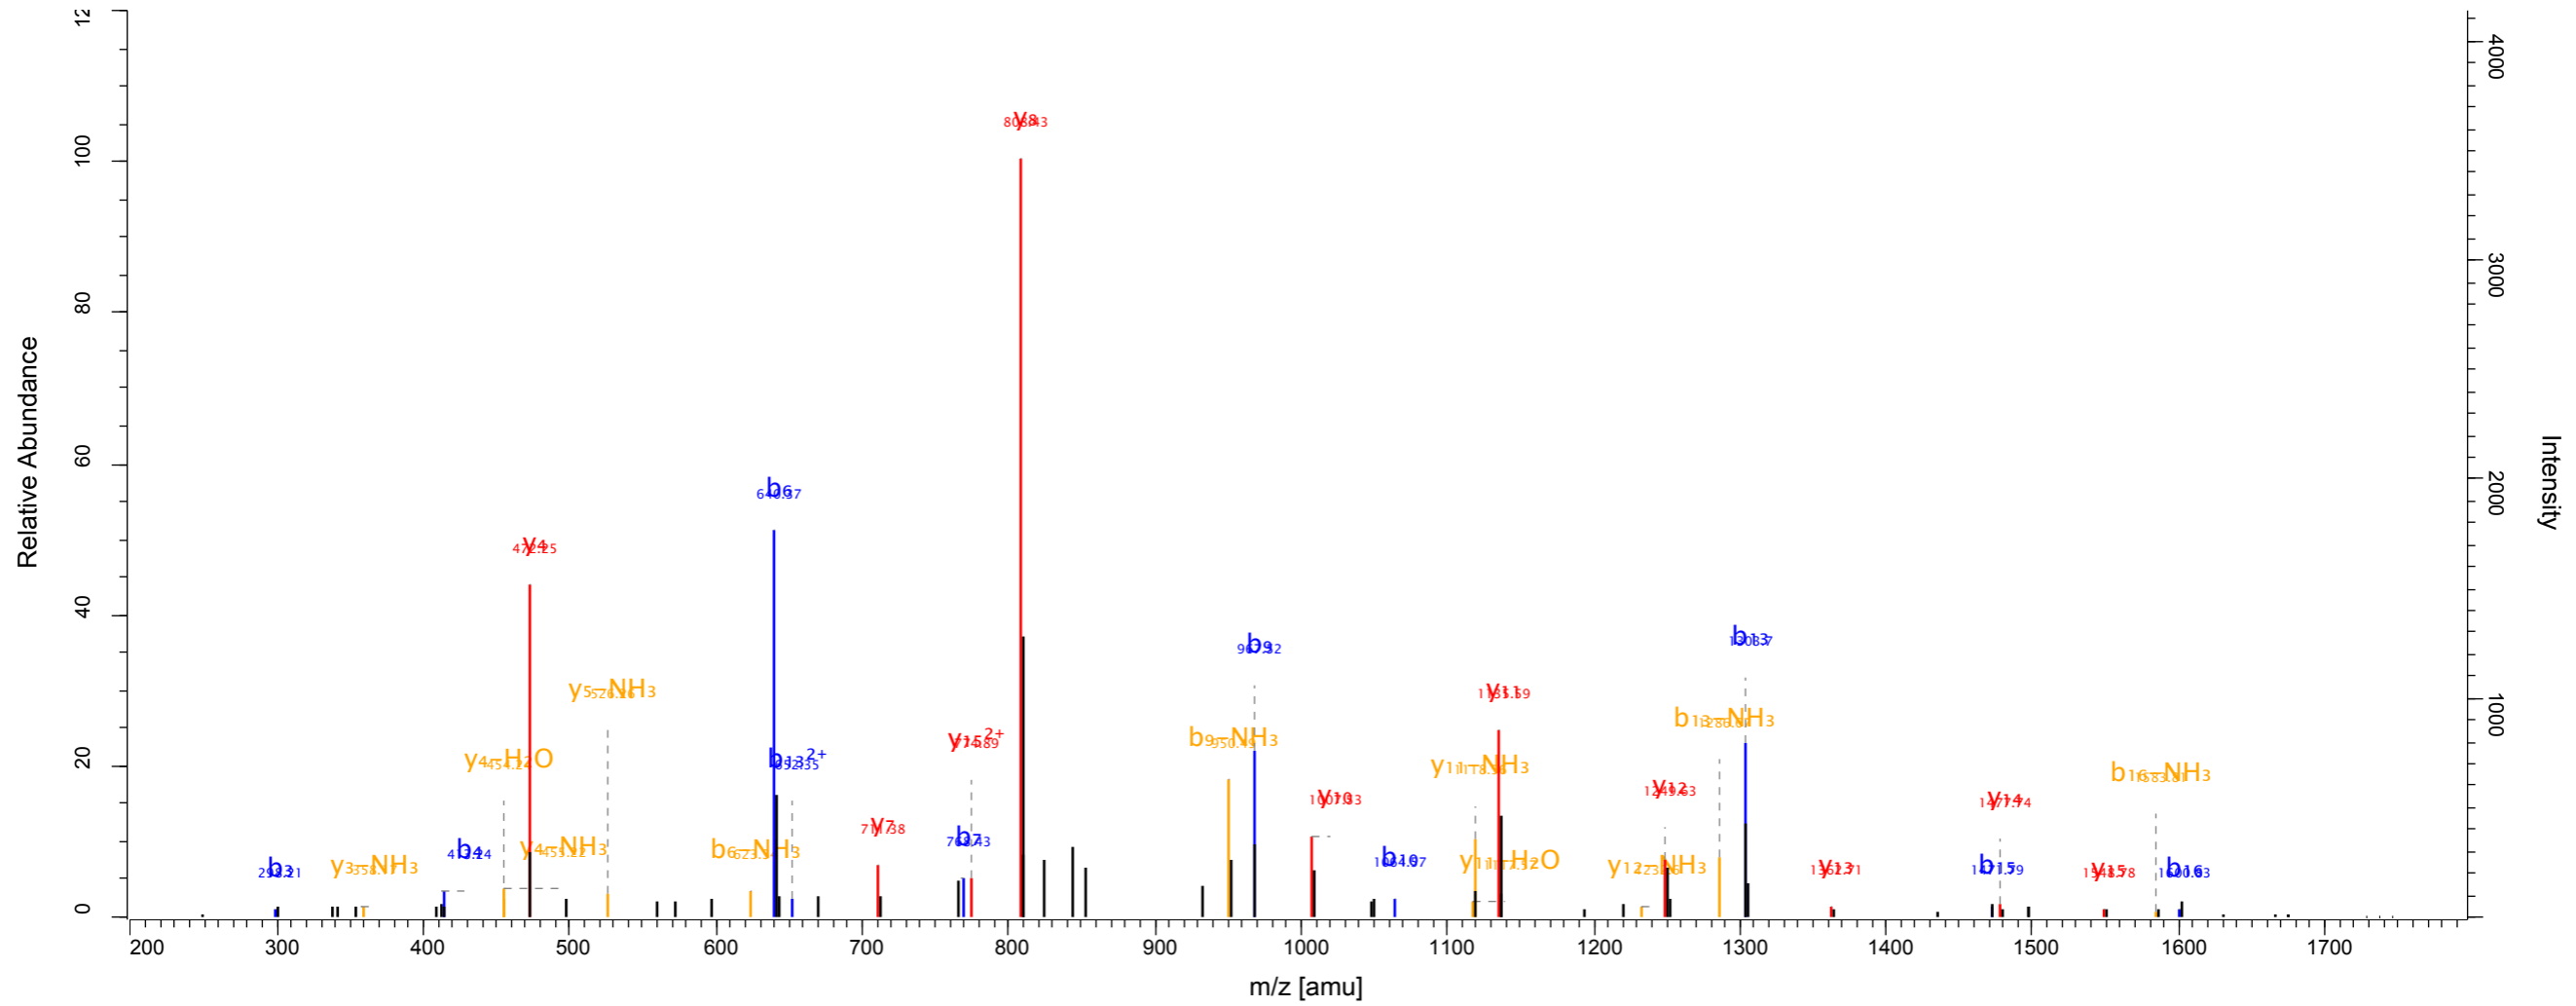

Scan number 2094 Raw file SKaraca\_LMB\_Reverse\_H3\_161011\_17\_rep1  
 Method ITMS; CID Pepti... 98.34

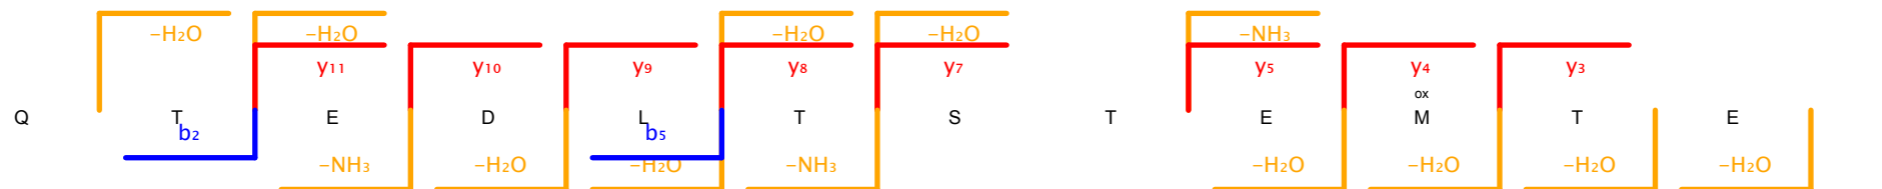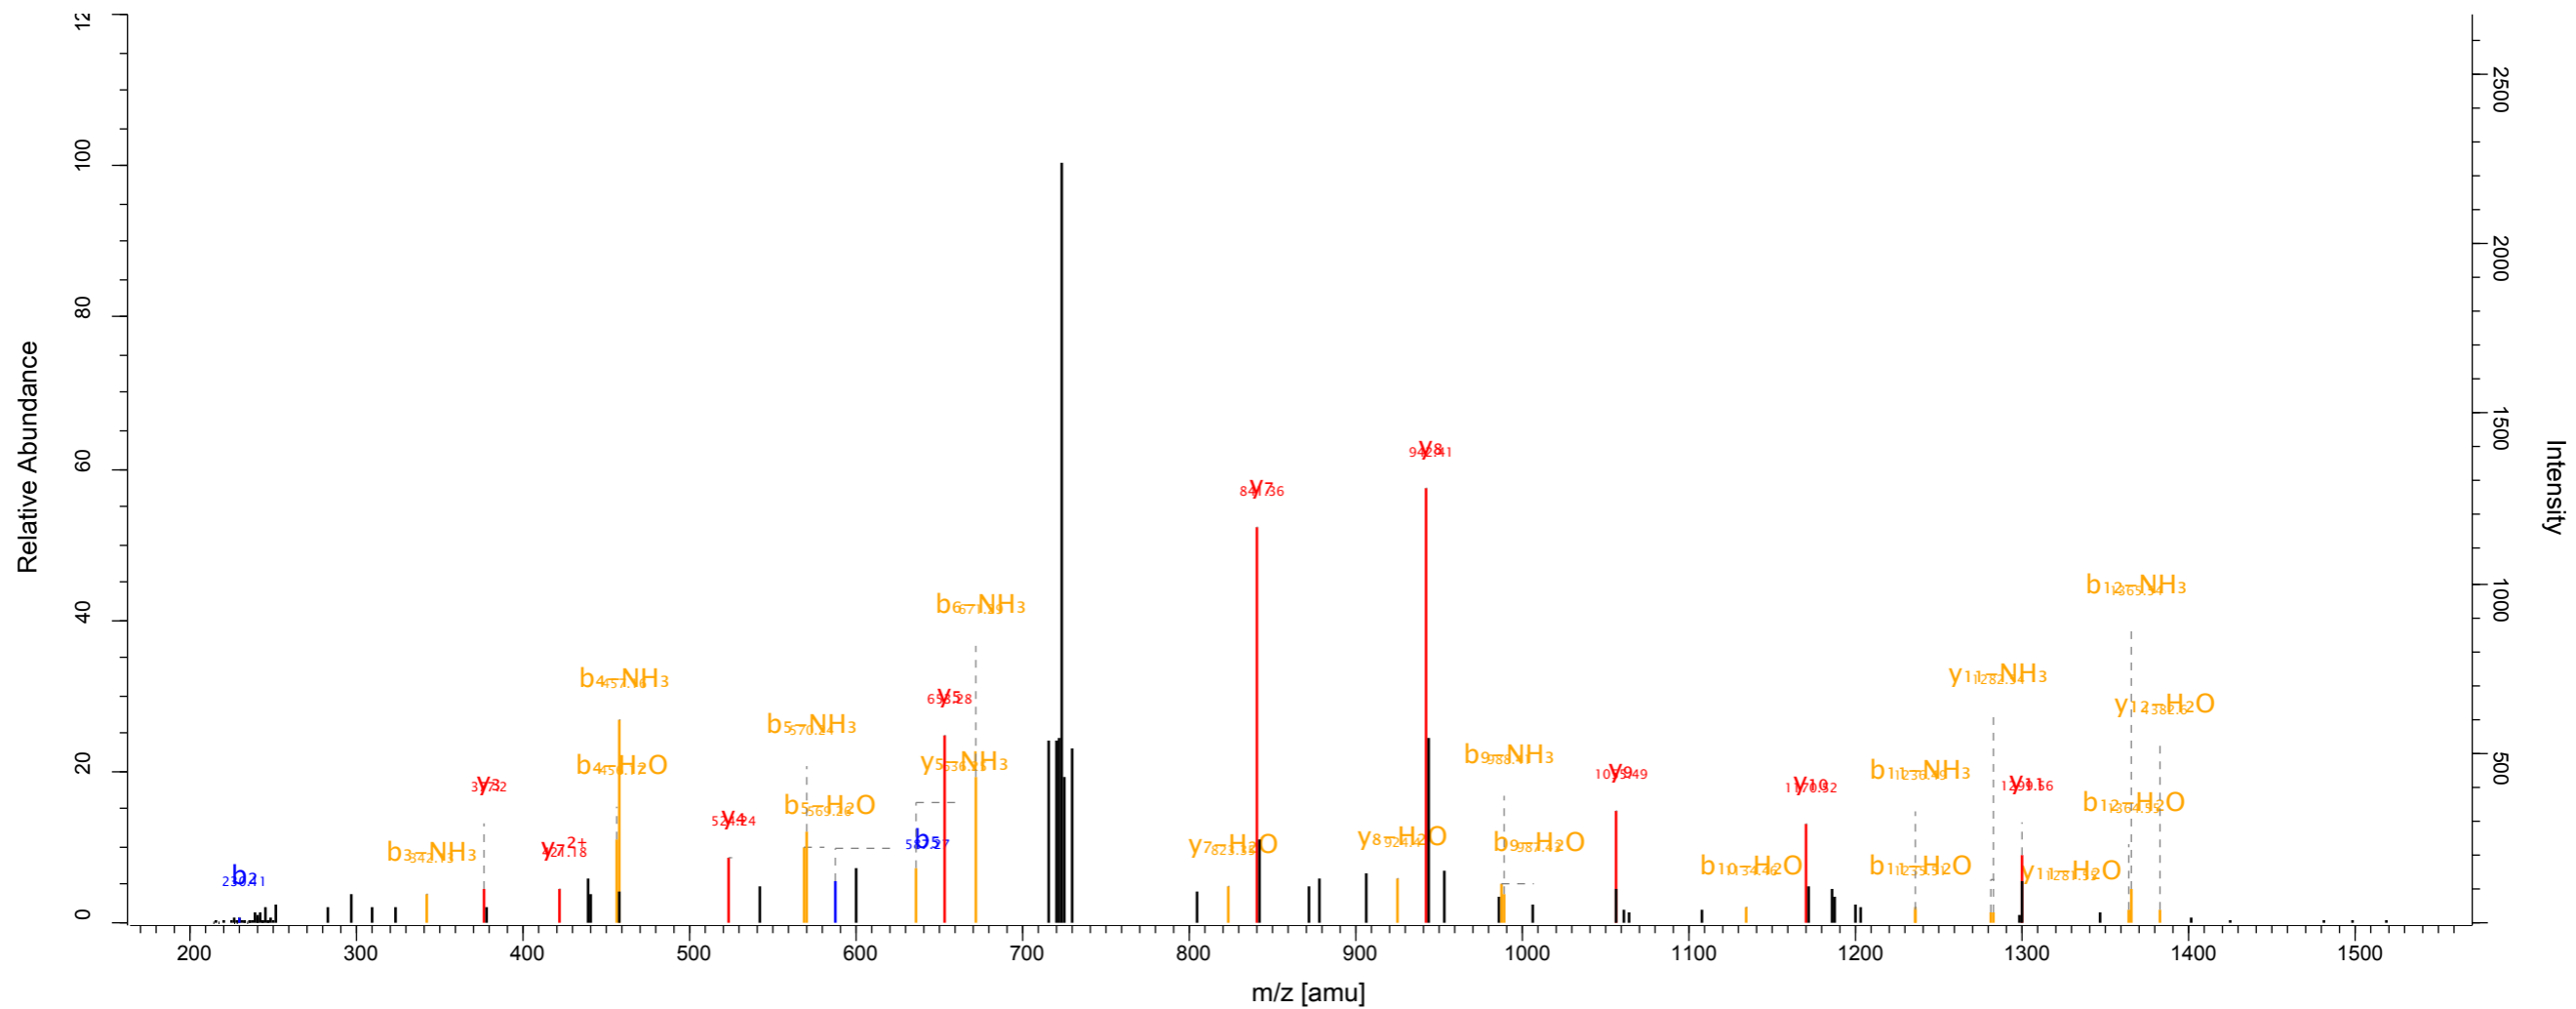

Scan number 5147 Raw file SKaraca\_LMB\_Reverse\_H3\_161011\_17\_rep2  
 Method ITMS; CID Pepti... 120.09

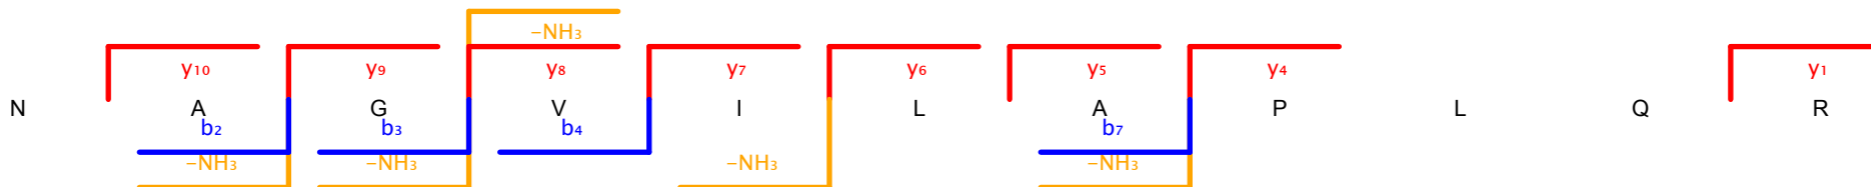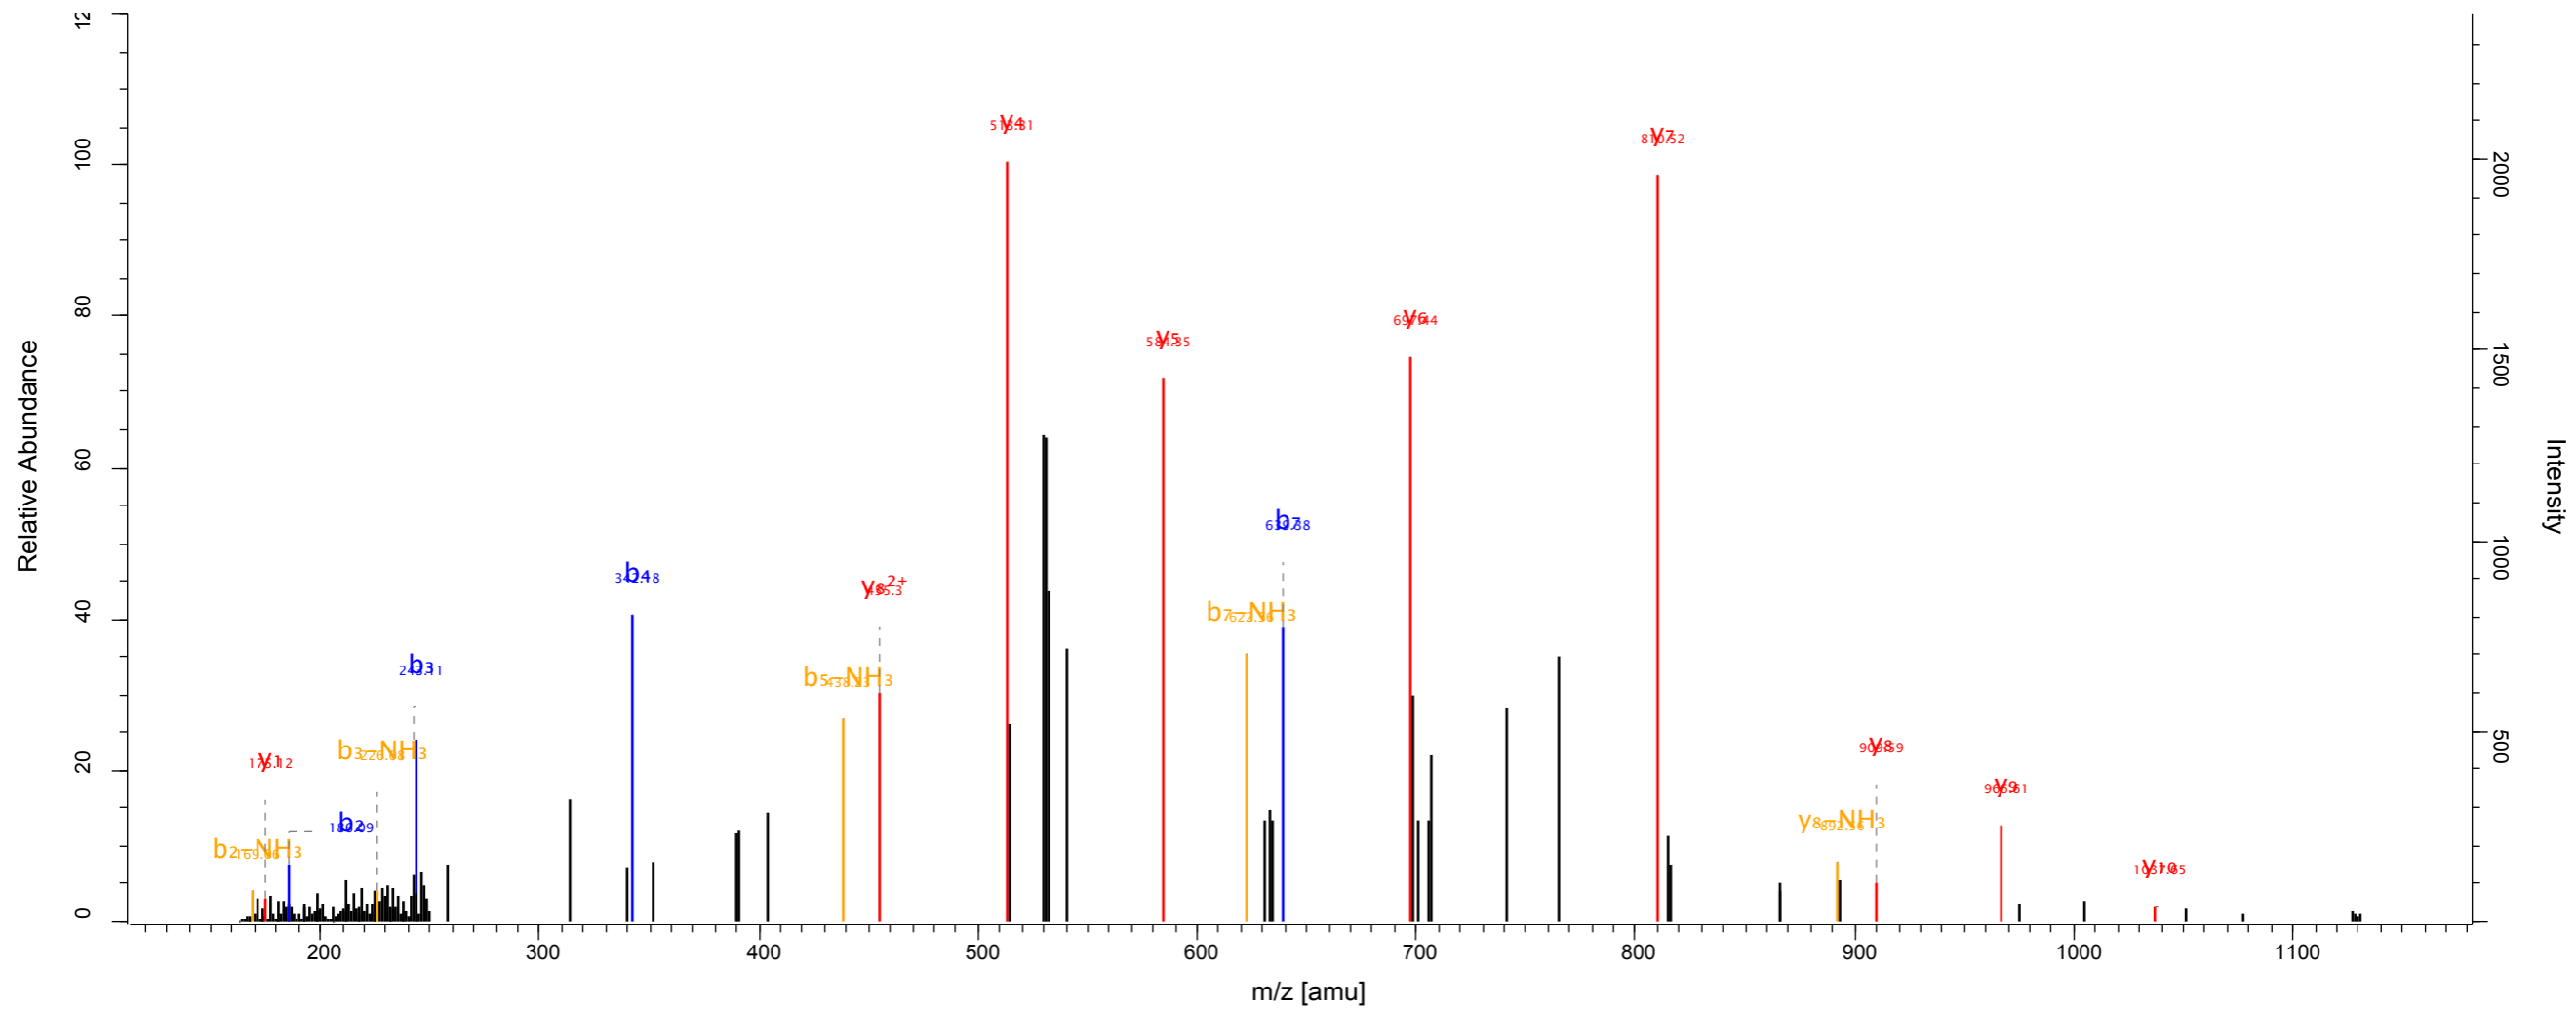

Scan number 2293 Raw file SKaraca\_LMB\_Reverse\_H3\_161011\_18\_rep1  
 Method ITMS; CID Pepti... 146.79

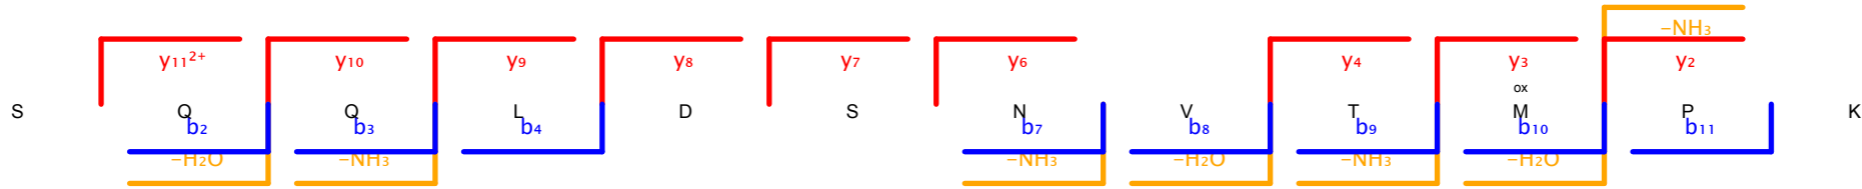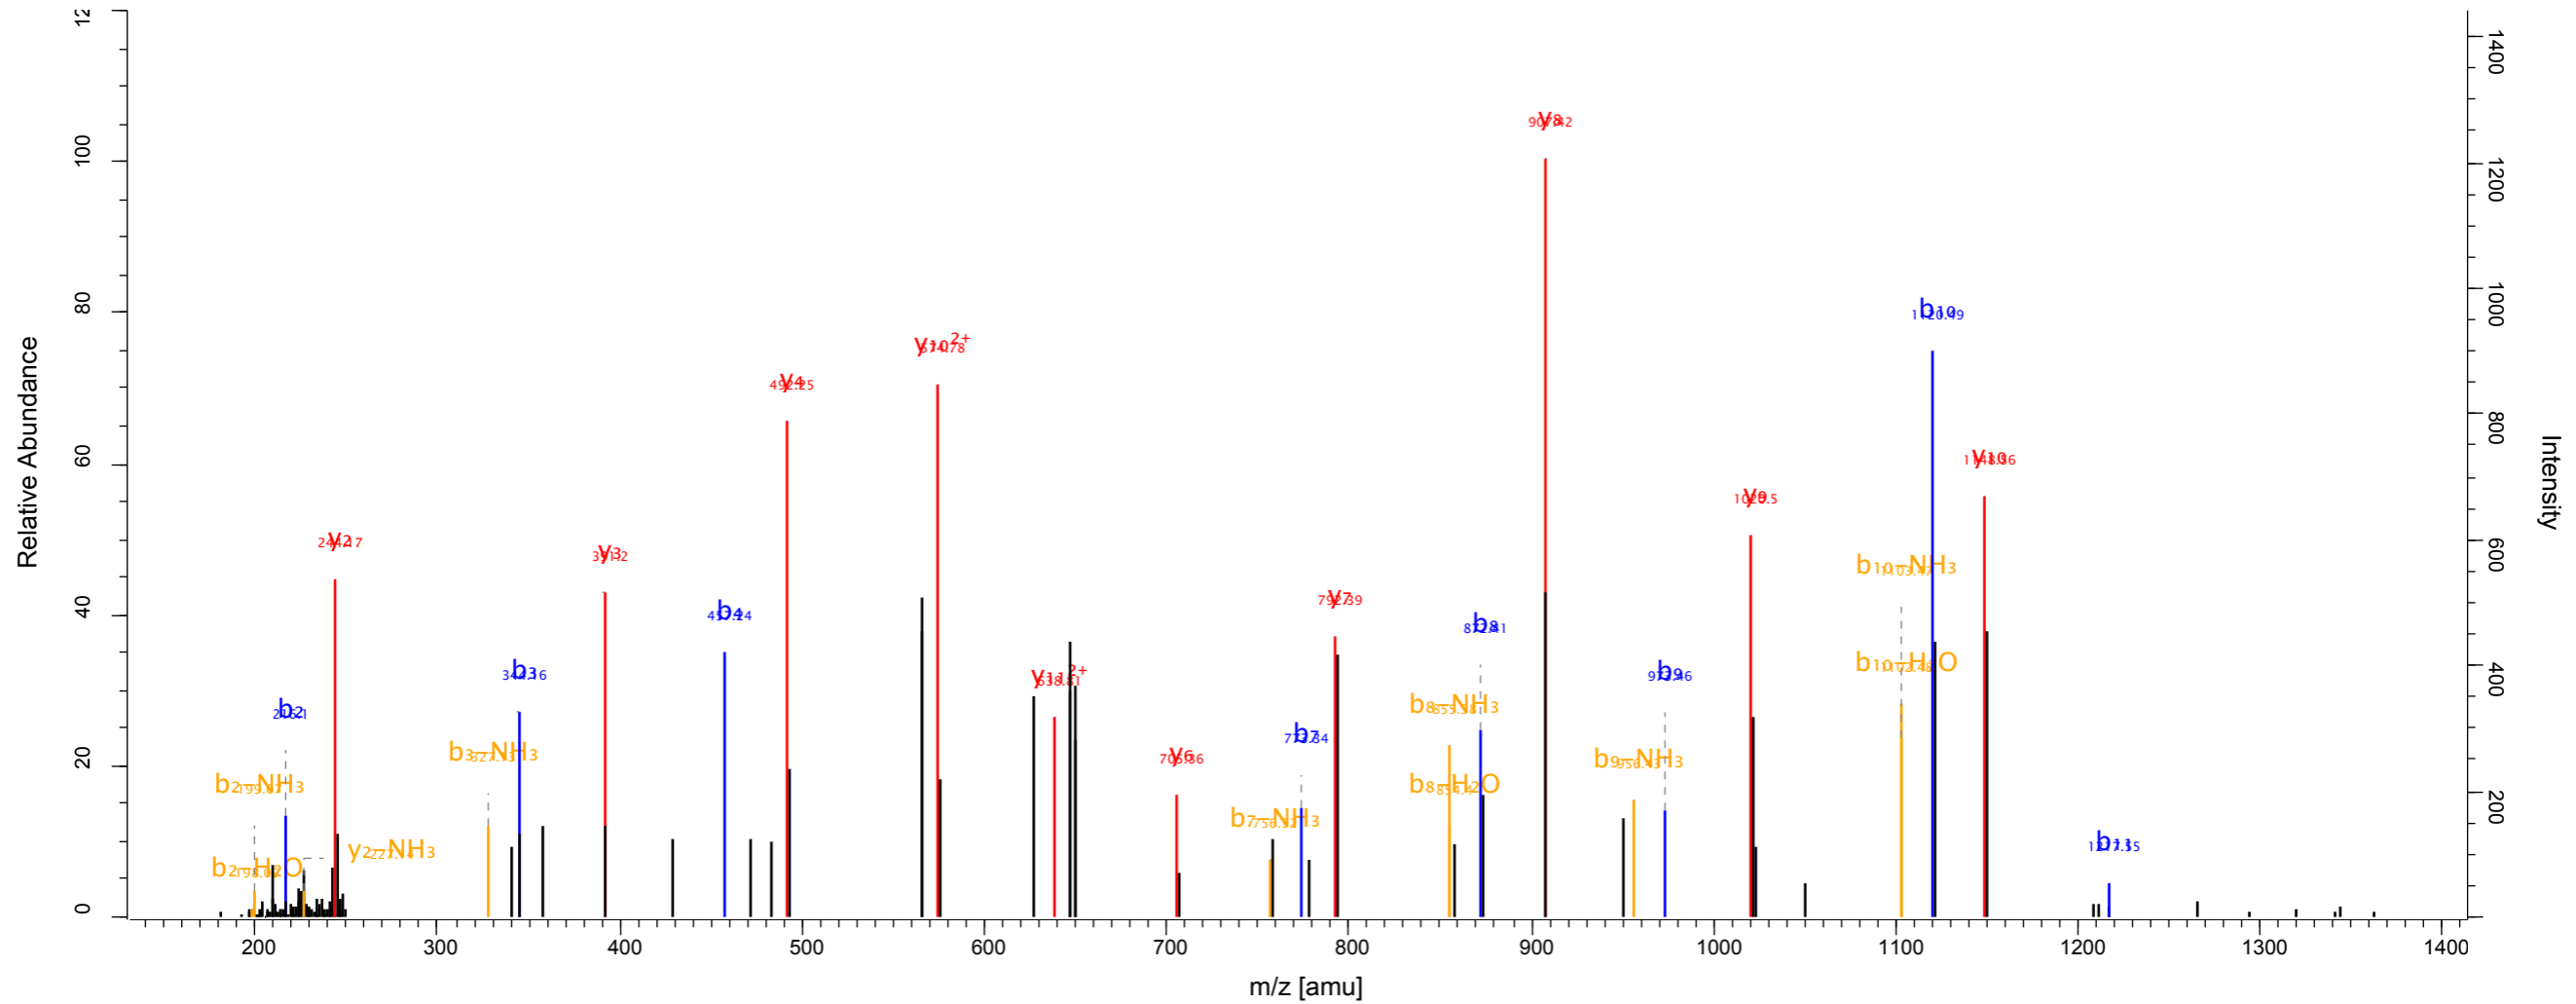

Scan number 1387 Raw file SKaraca\_LMB\_Reverse\_H3\_161011\_18\_rep2  
 Method ITMS; CID Pepti... 157.24

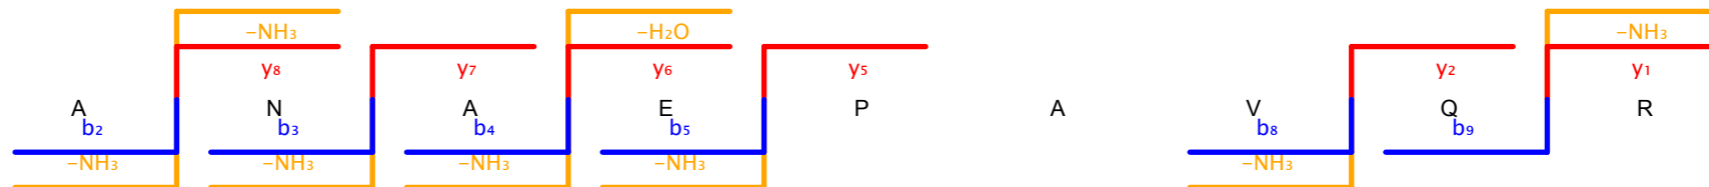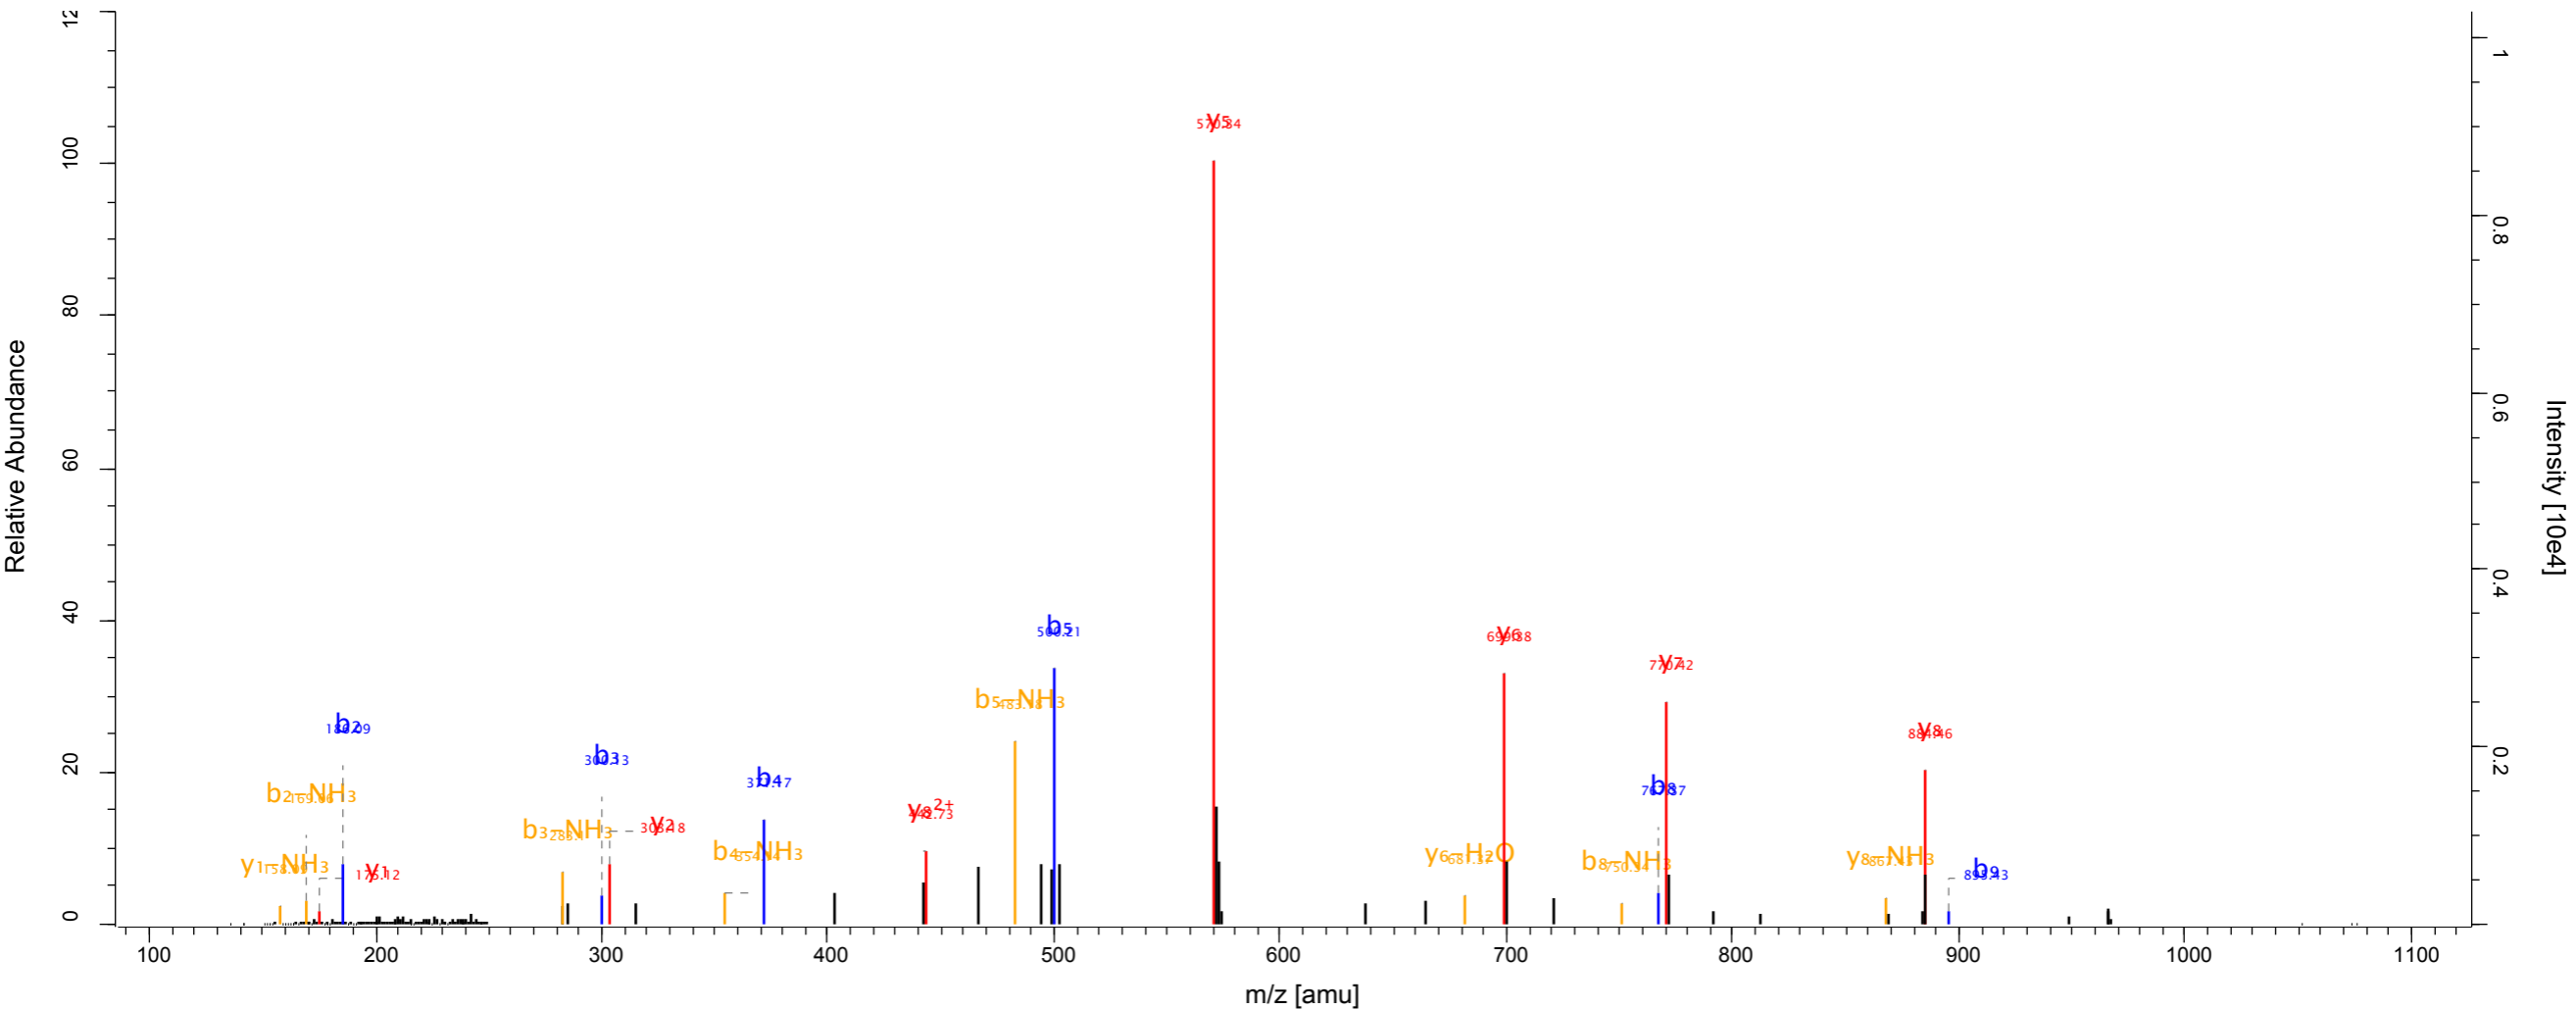

Scan number 2414 Raw file SKaraca\_LMB\_Reverse\_H3\_161011\_19\_rep2  
 Method ITMS; CID Pepti... 220.27

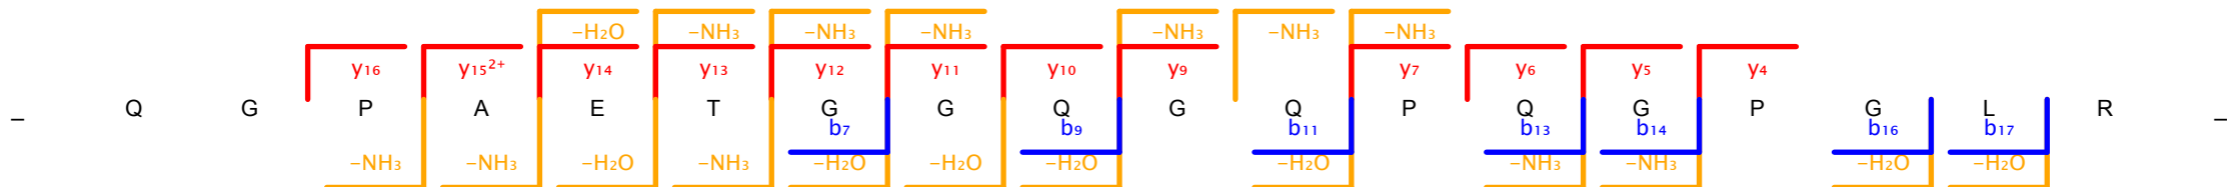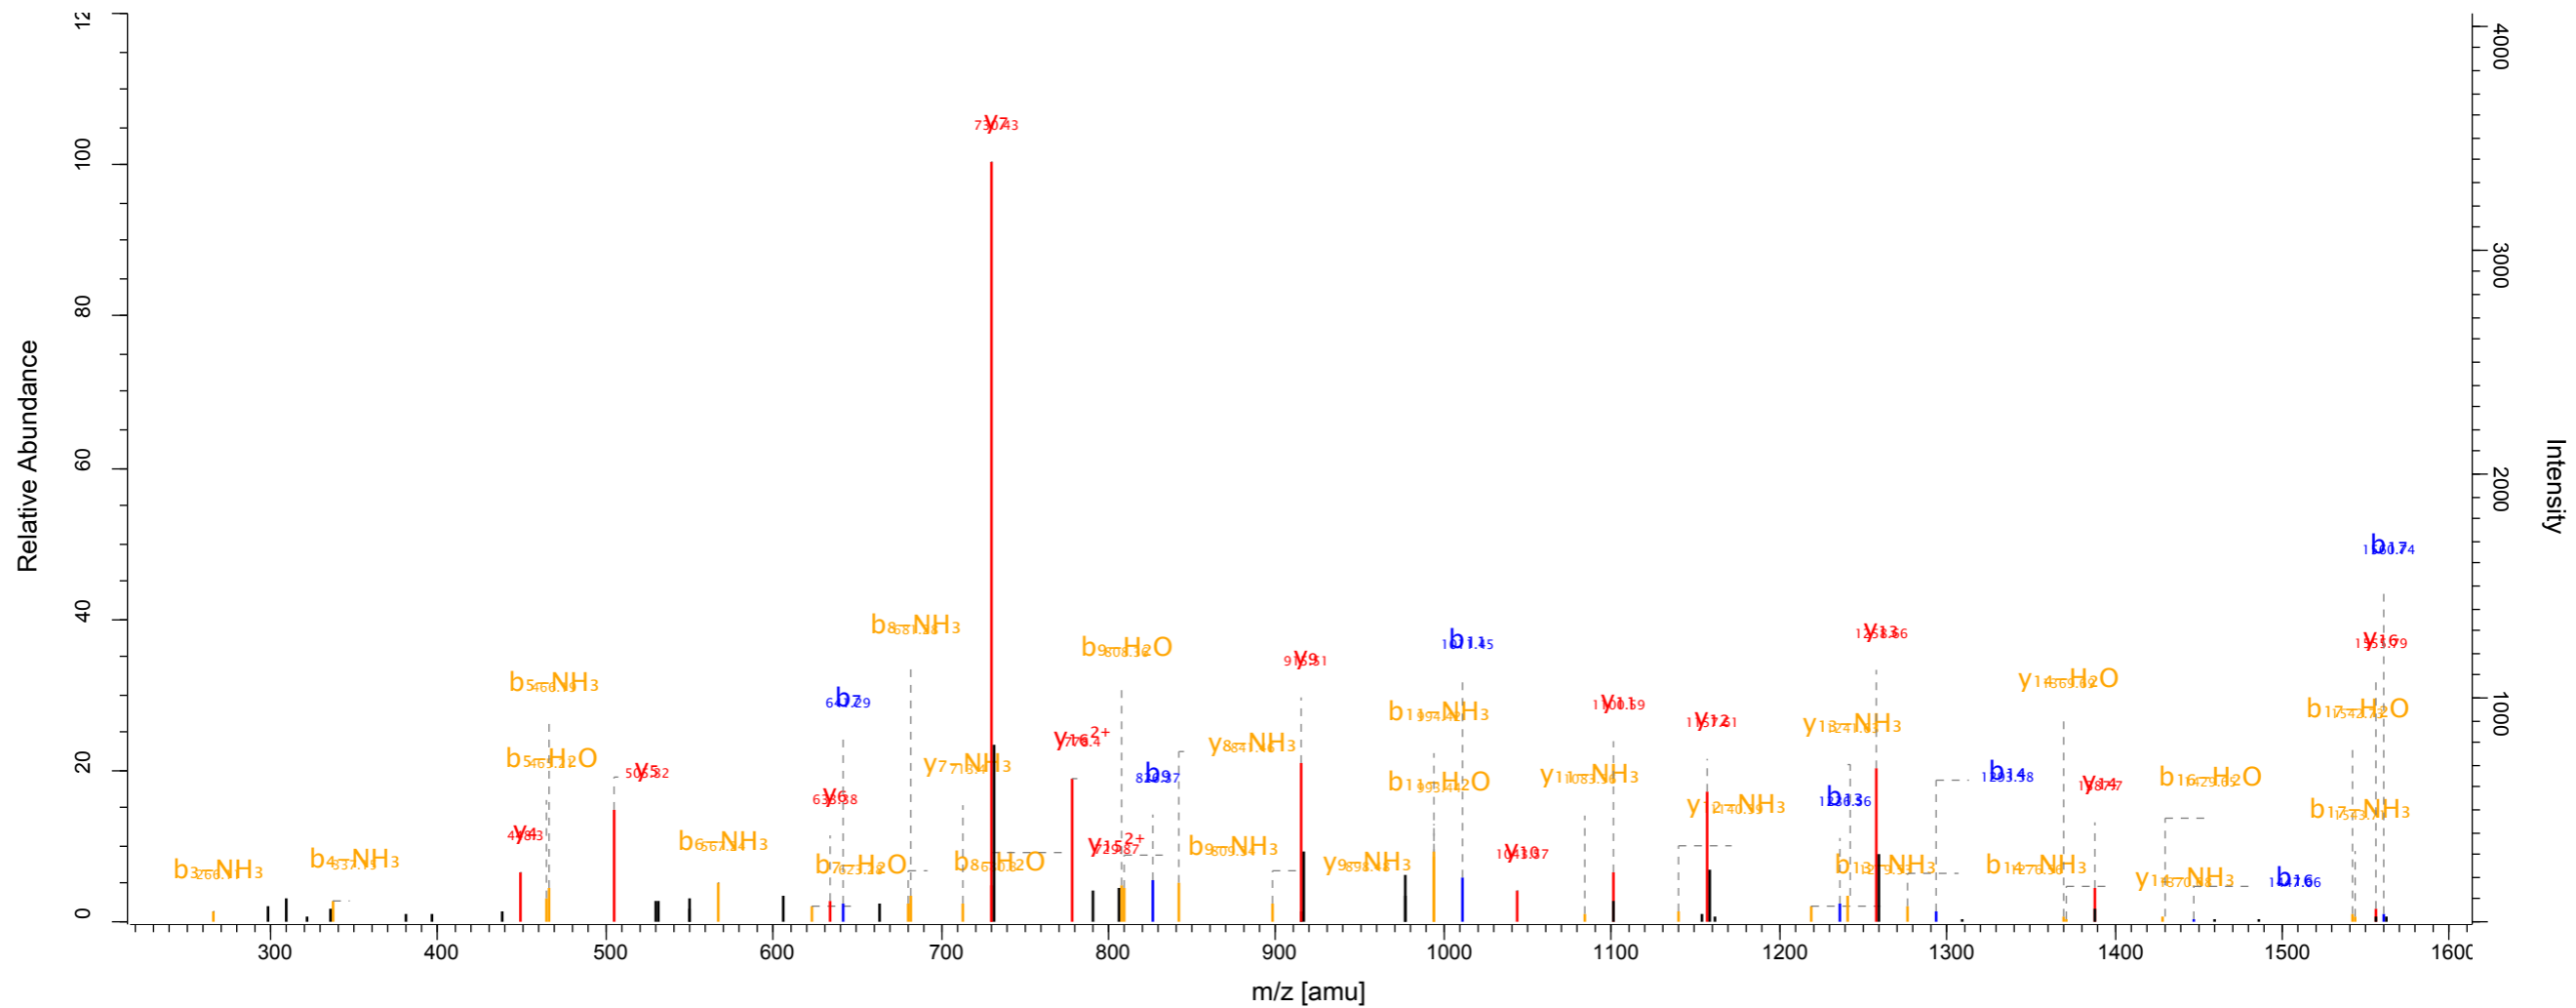

Scan number 4641 Raw file SKaraca\_LMB\_Reverse\_H3\_161011\_20\_rep1  
 Method ITMS; CID Pepti... 140.49

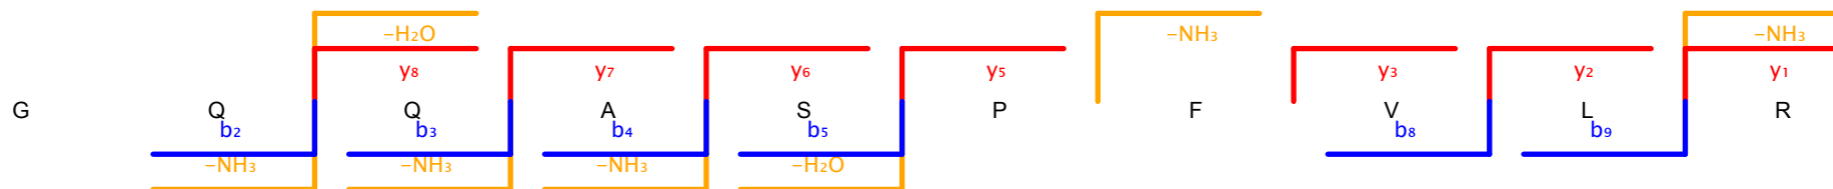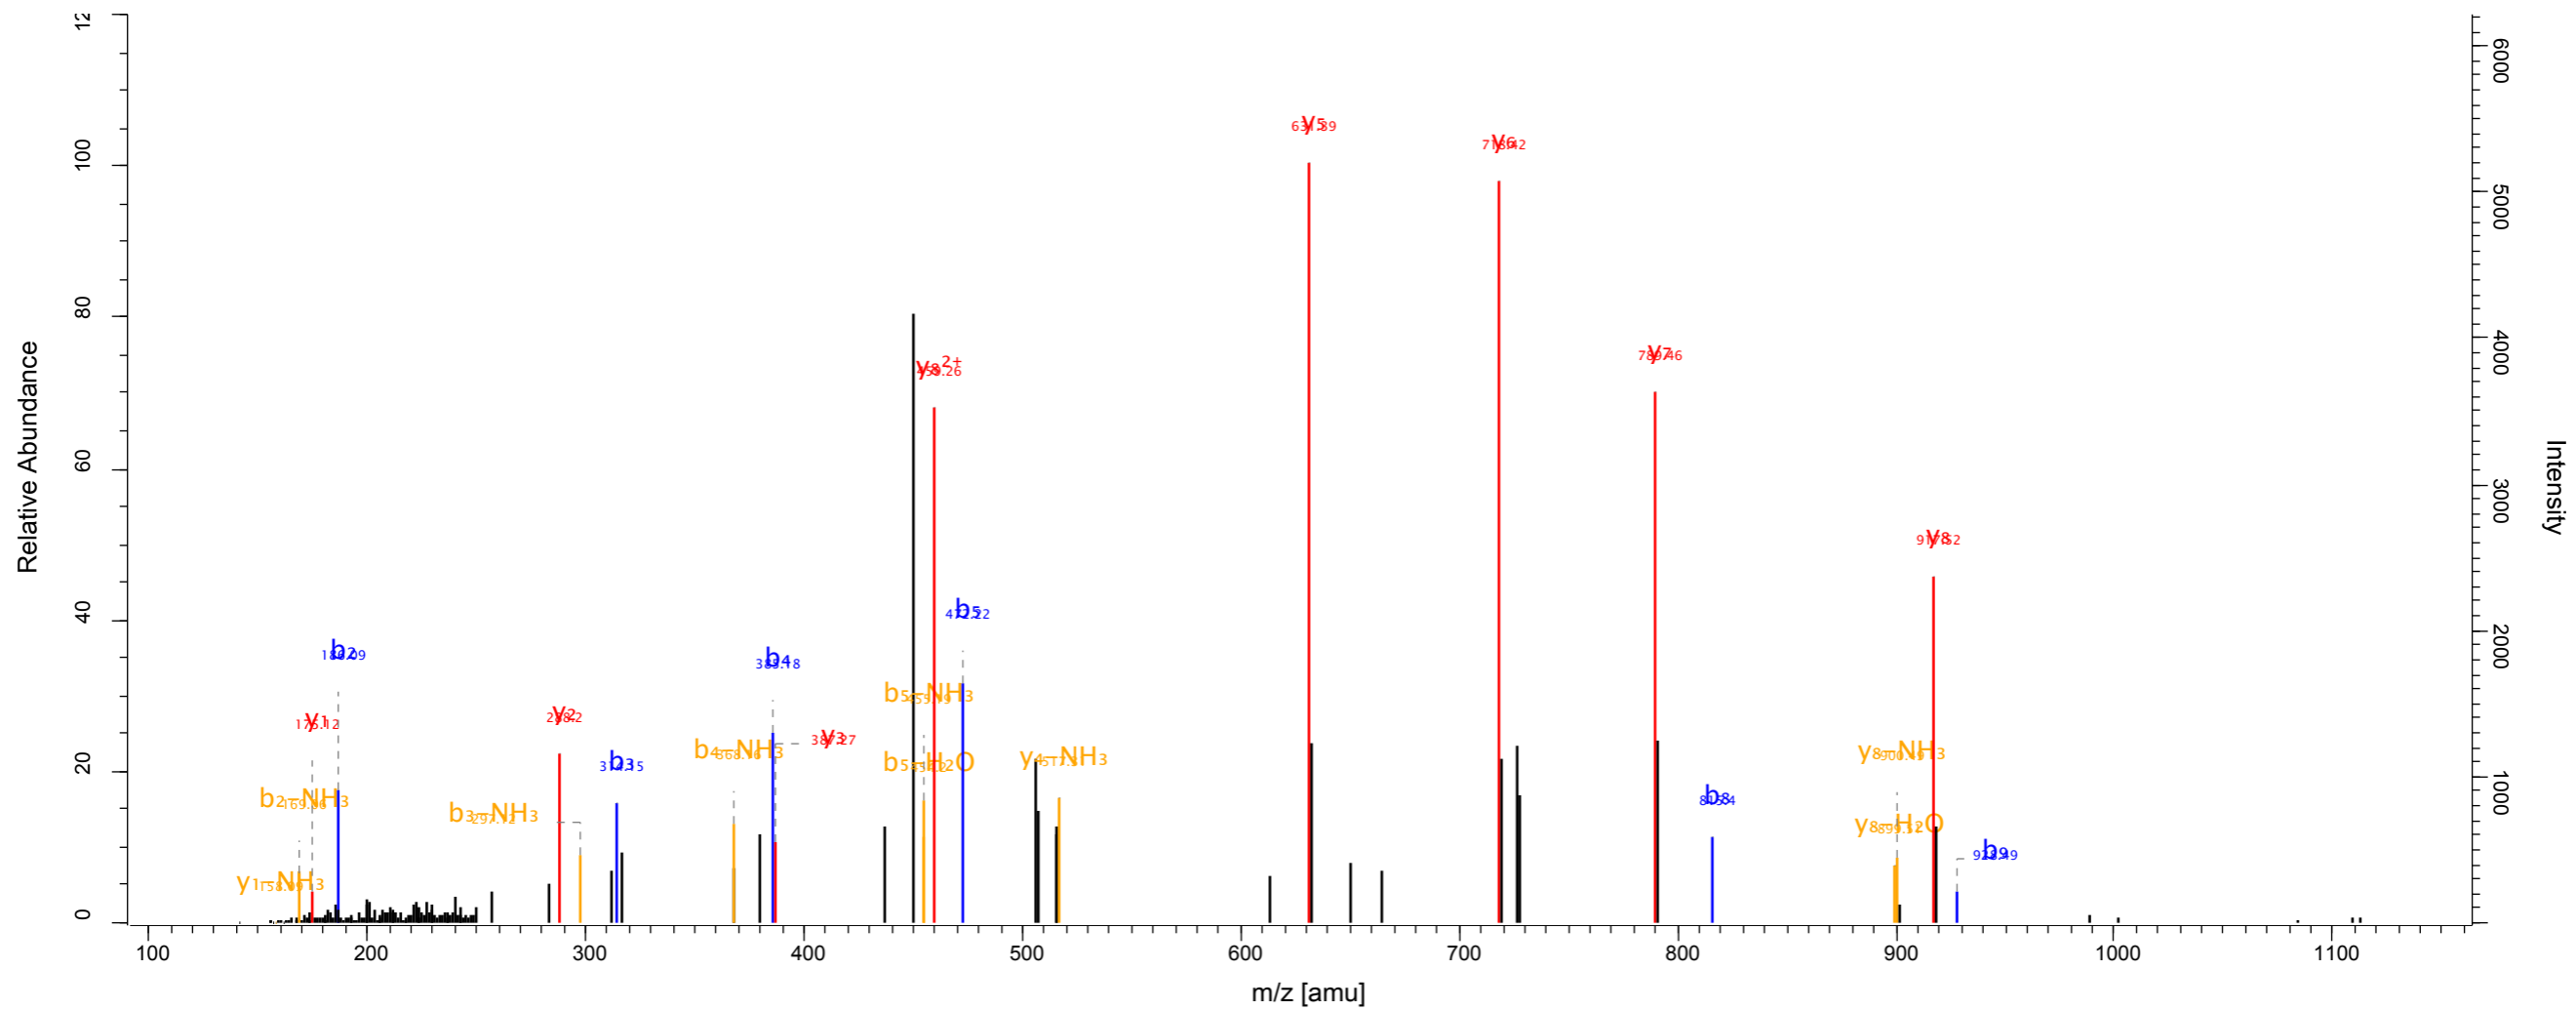

Scan number 6919 Raw file SKaraca\_LMB\_Reverse\_H3\_161011\_20\_rep2  
 Method ITMS; CID Pepti... 182.39

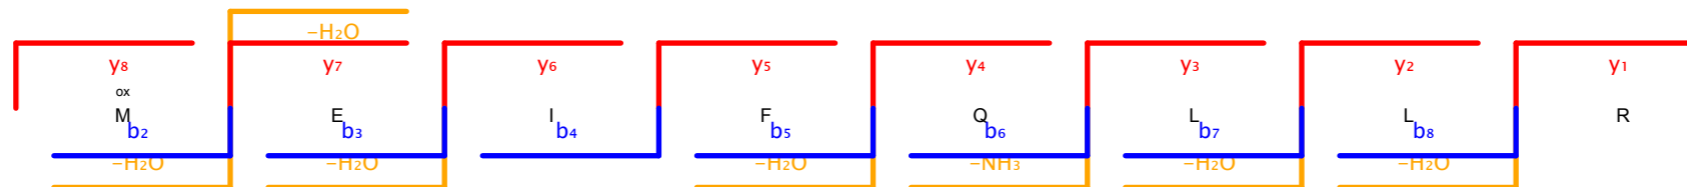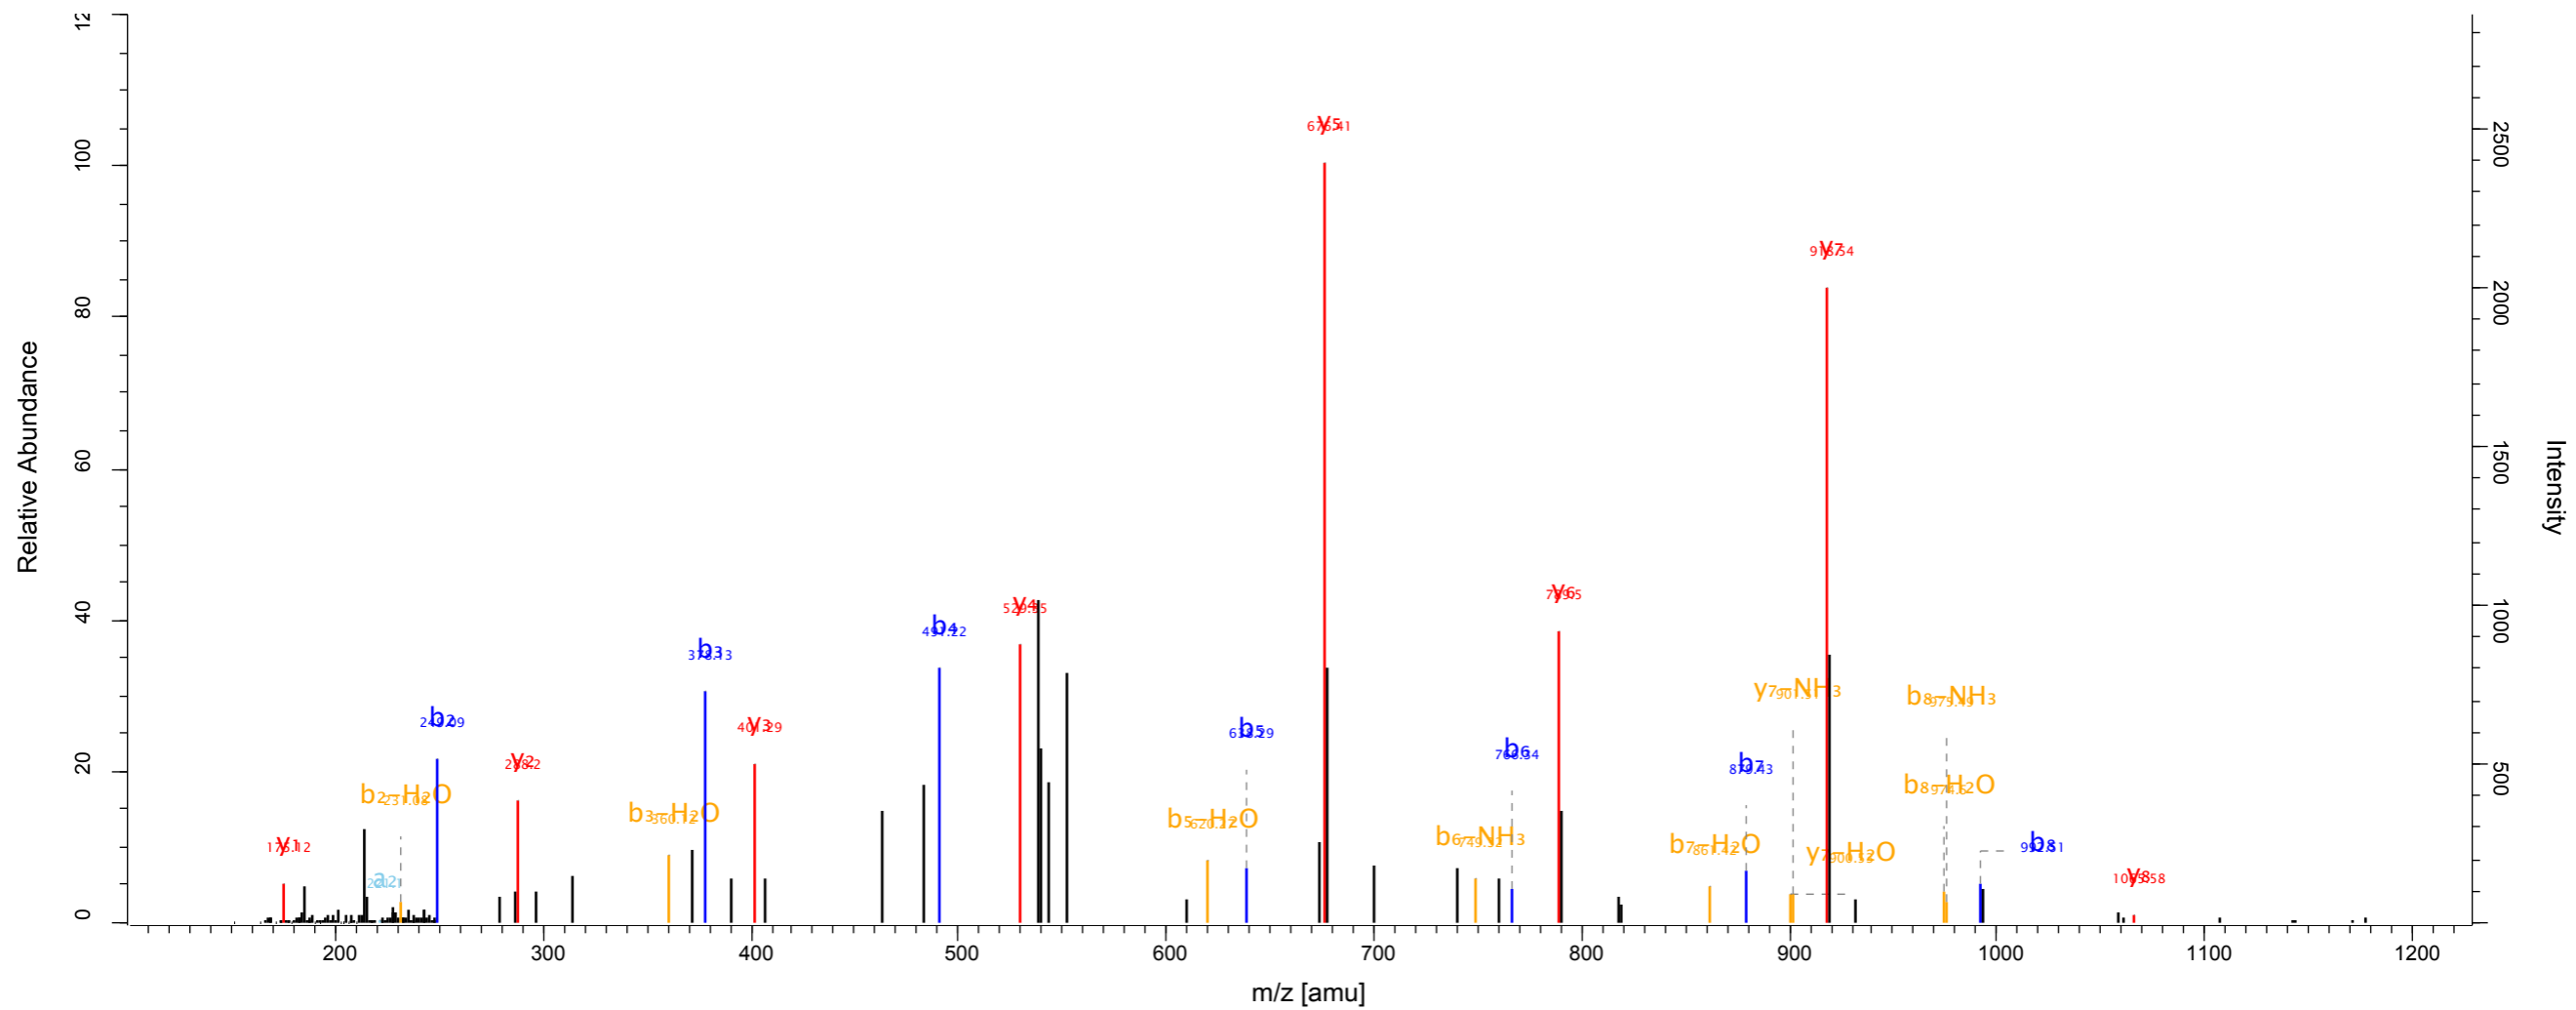



Scan number 6262 Raw file SKaraca\_LMB\_Reverse\_H3\_161011\_22\_rep1  
 Method ITMS; CID Pepti... 177.83

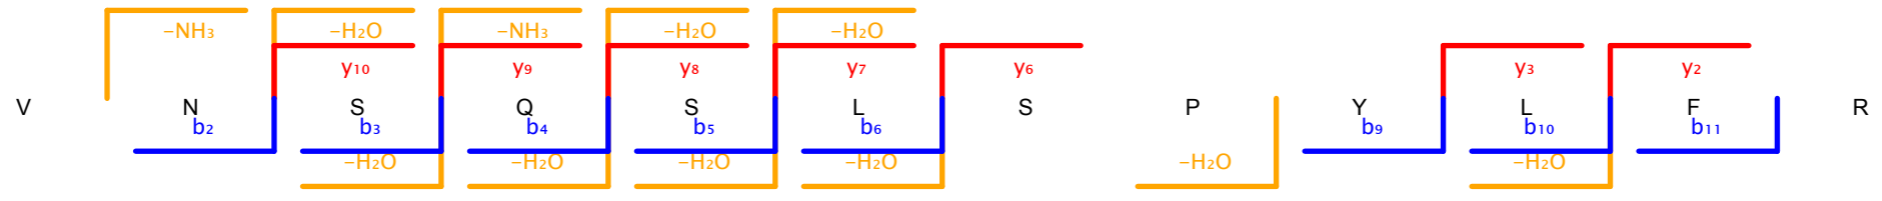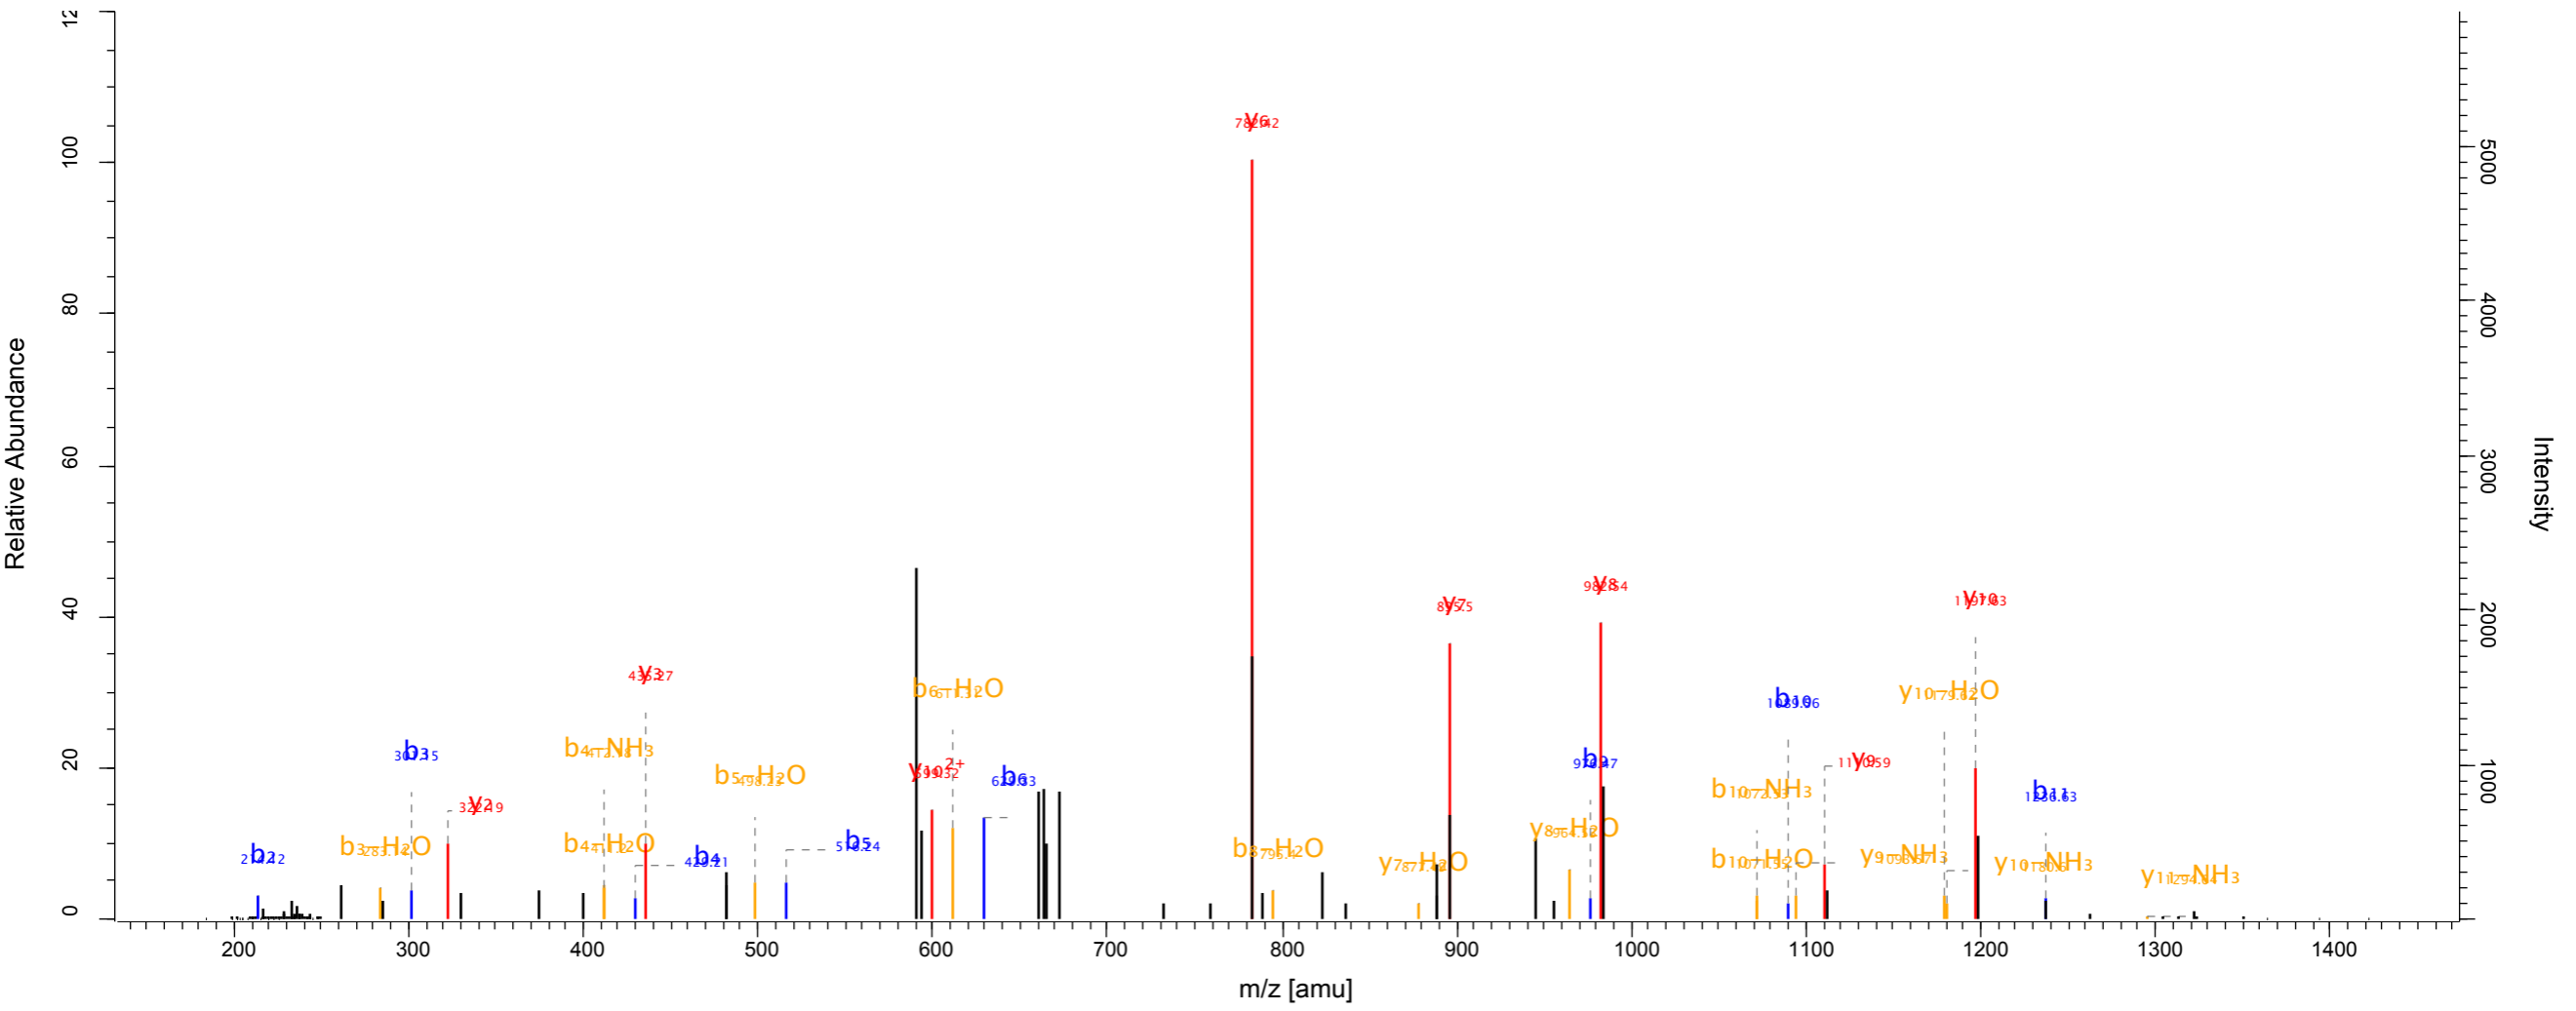

|             |           |          |                                      |
|-------------|-----------|----------|--------------------------------------|
| Scan number | 4948      | Raw file | SKaraca_LMB_Reverse_H3_161011_4_rep1 |
| Method      | ITMS; CID | Pepti... | 151.7                                |

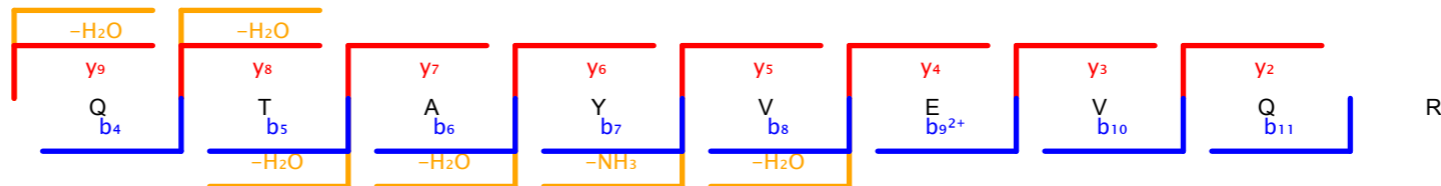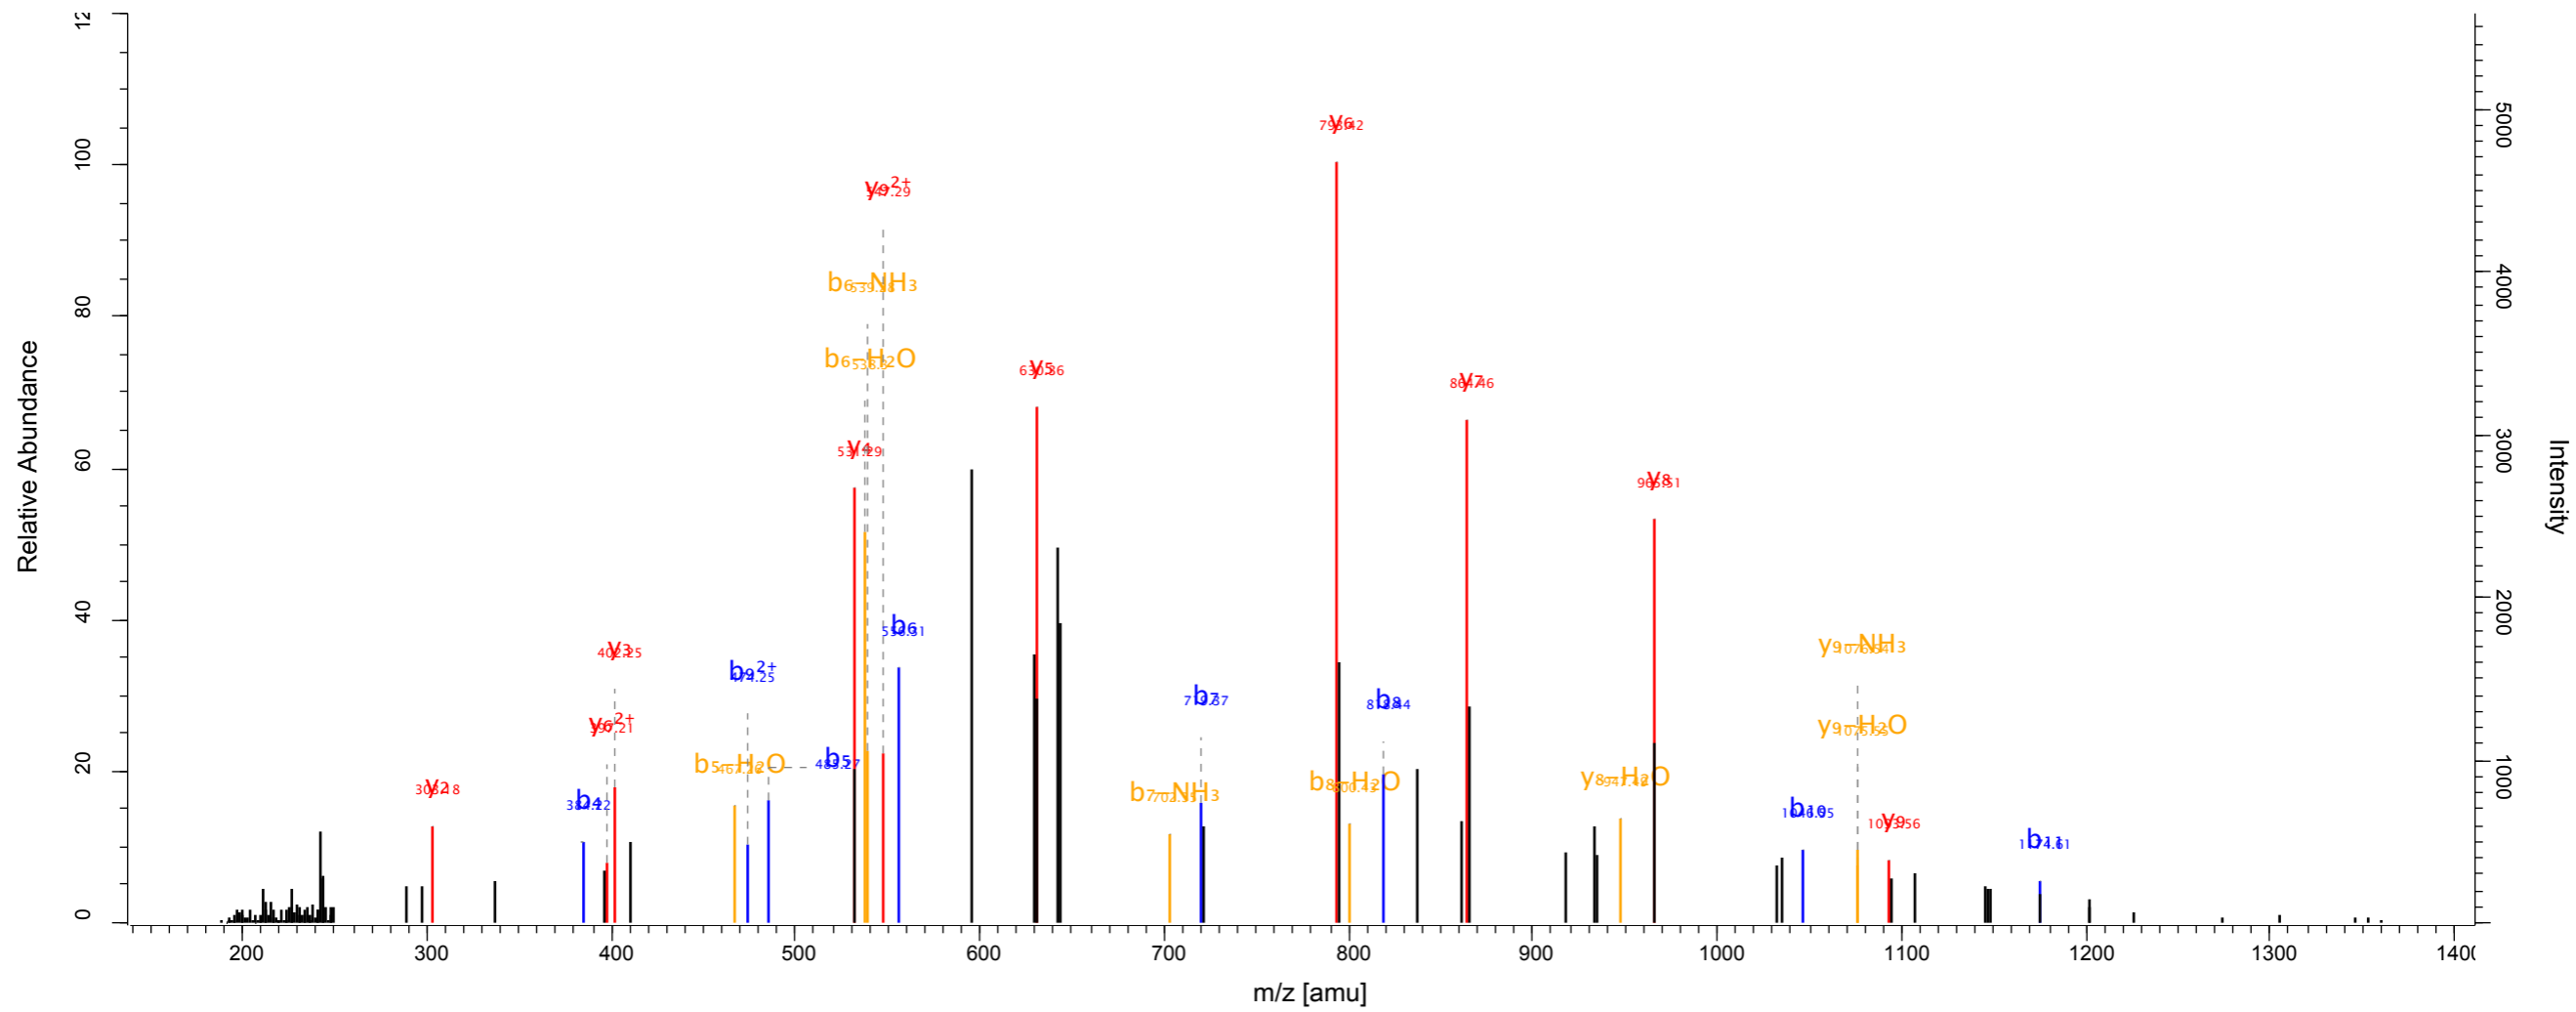

|             |           |          |                                      |
|-------------|-----------|----------|--------------------------------------|
| Scan number | 8998      | Raw file | SKaraca_LMB_Reverse_H3_161011_4_rep2 |
| Method      | ITMS; CID | Pepti... | 141.37                               |

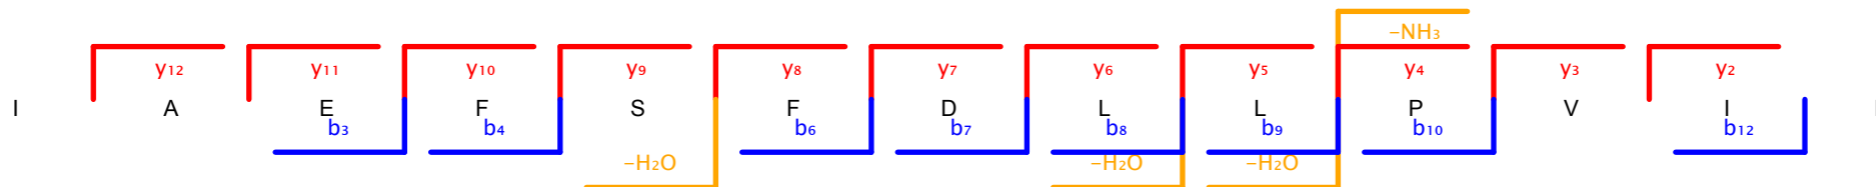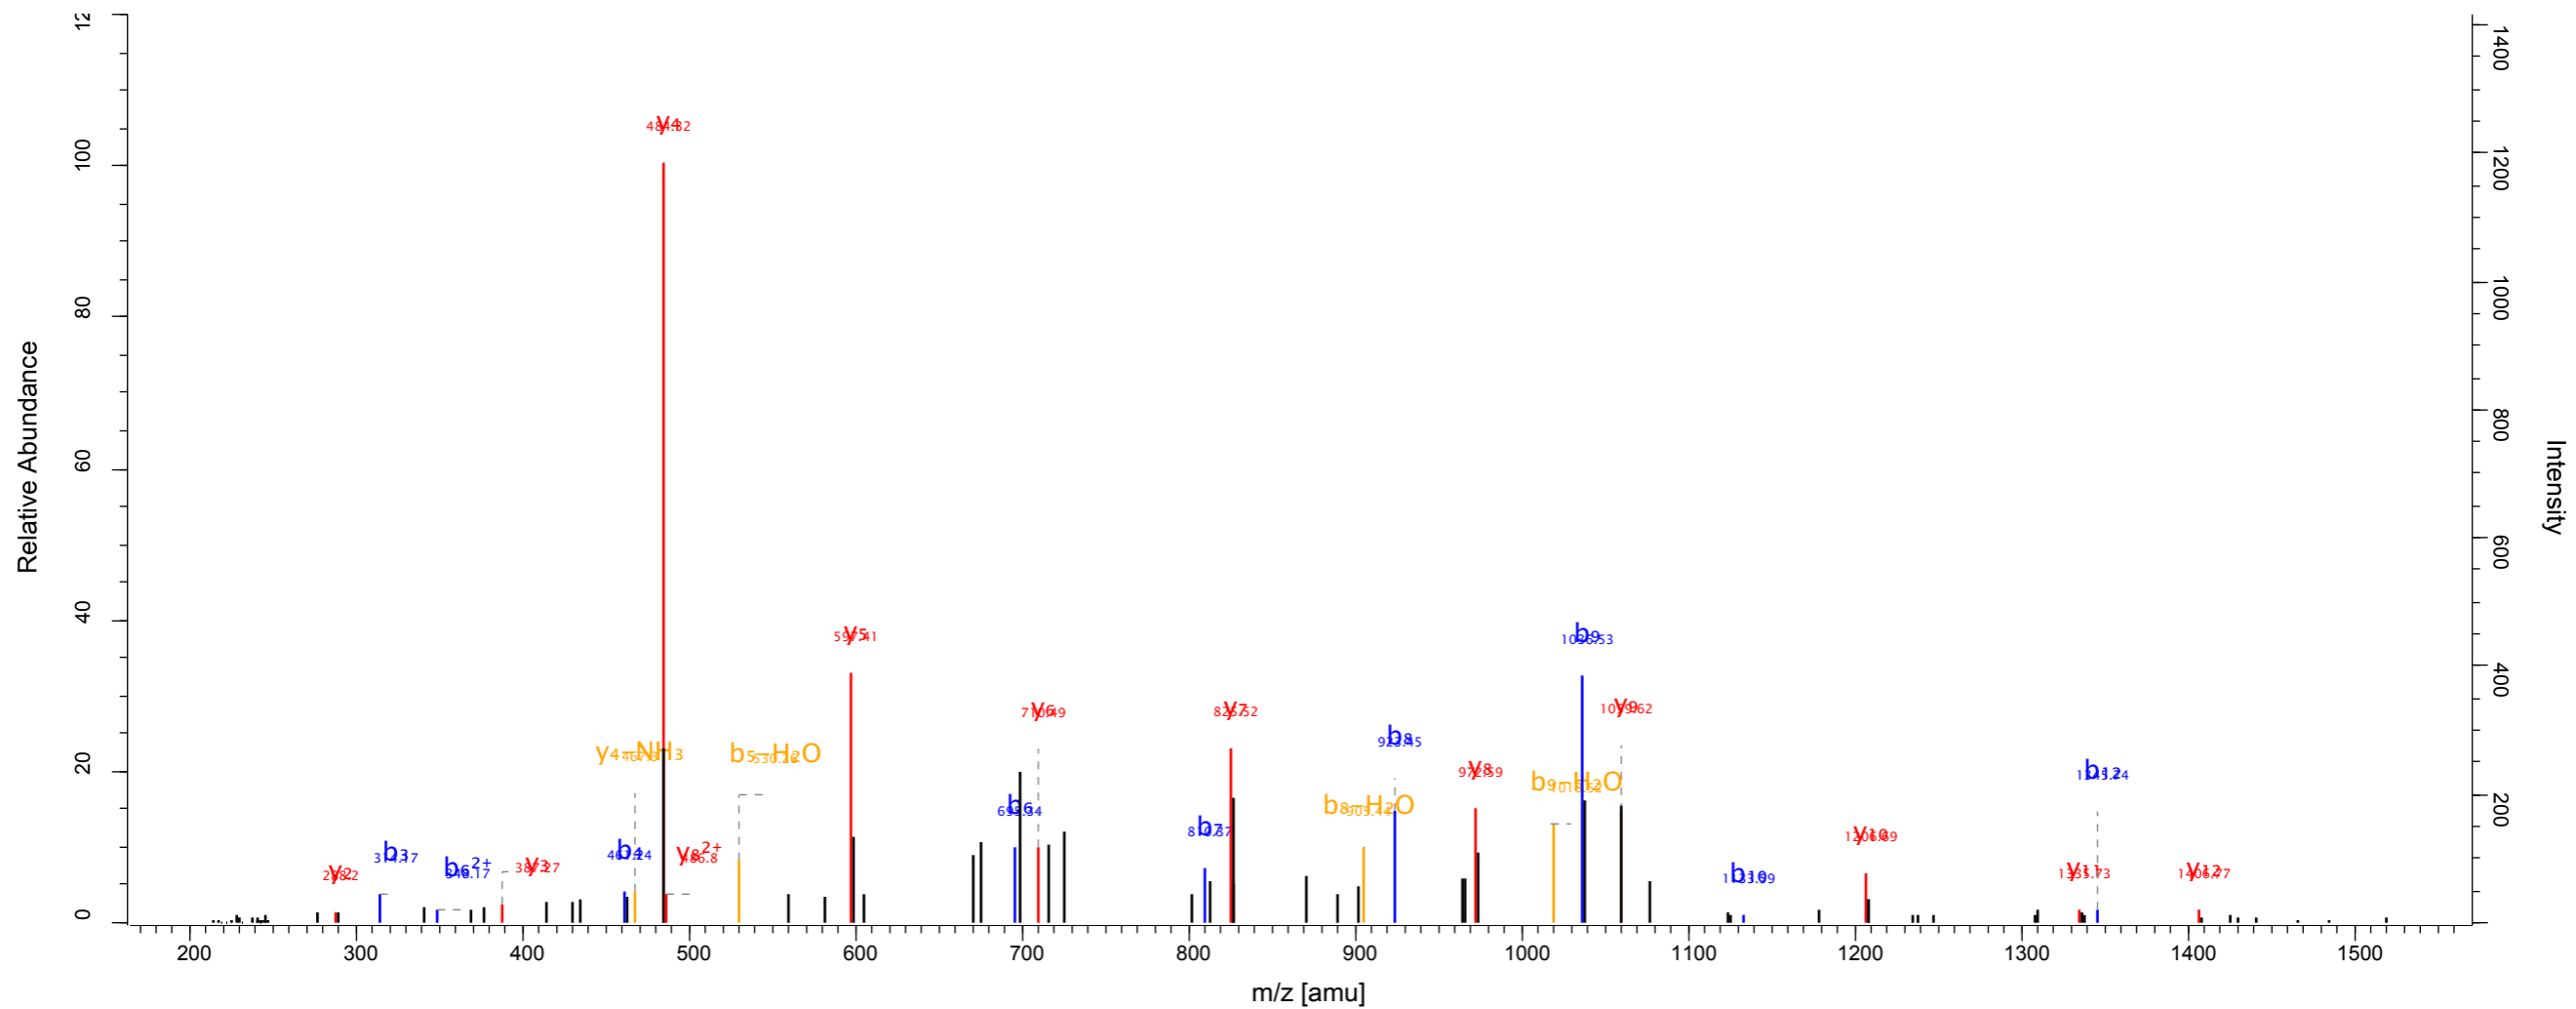

|             |           |          |                                      |
|-------------|-----------|----------|--------------------------------------|
| Scan number | 4566      | Raw file | SKaraca_LMB_Reverse_H3_161011_6_rep1 |
| Method      | ITMS; CID | Pepti... | 134.49                               |

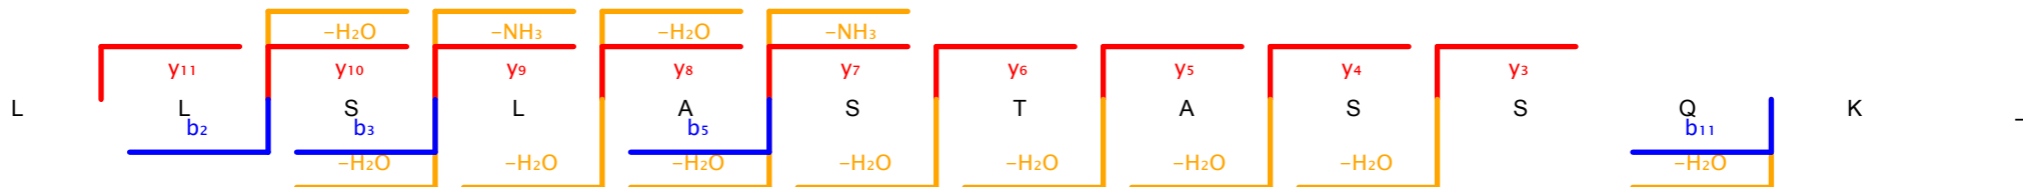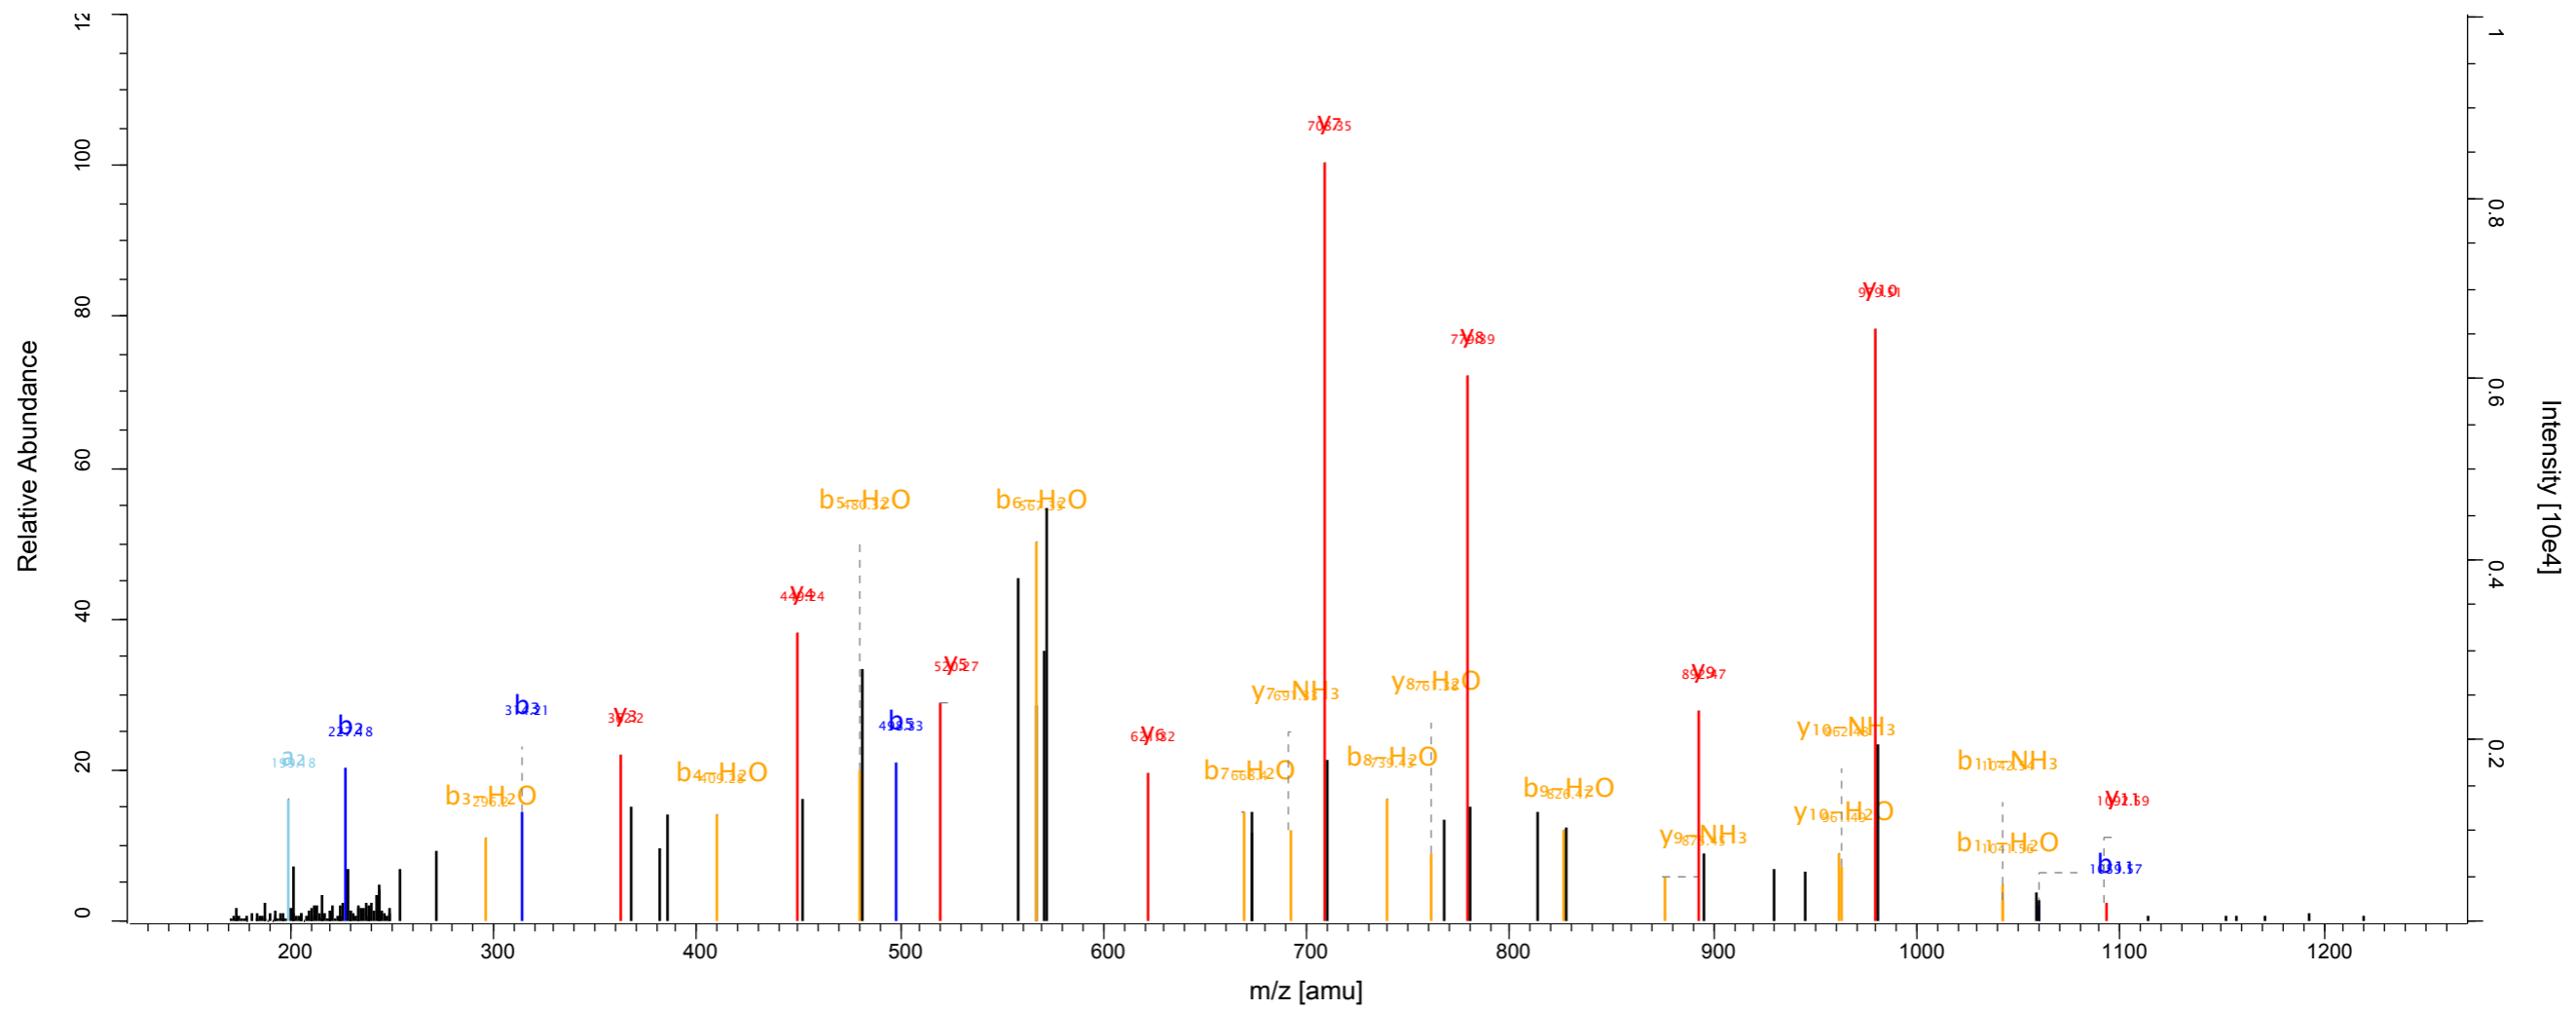

|             |           |          |                                      |
|-------------|-----------|----------|--------------------------------------|
| Scan number | 4702      | Raw file | SKaraca_LMB_Reverse_H3_161011_6_rep2 |
| Method      | ITMS; CID | Pepti... | 142.08                               |

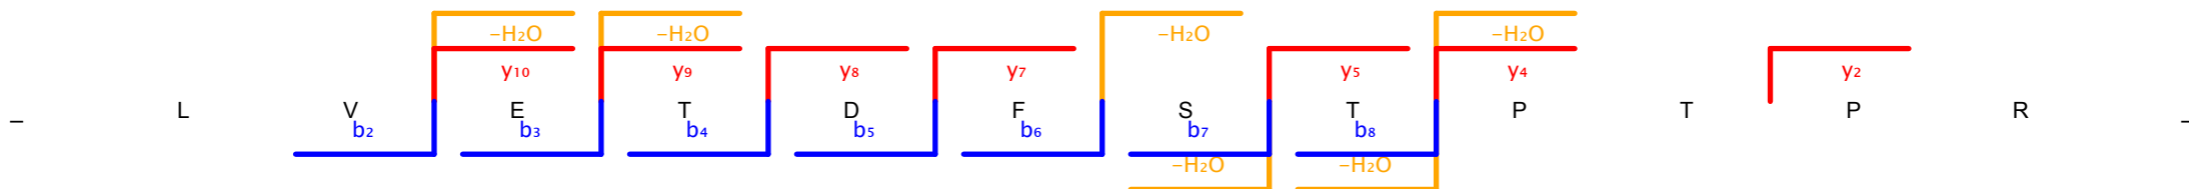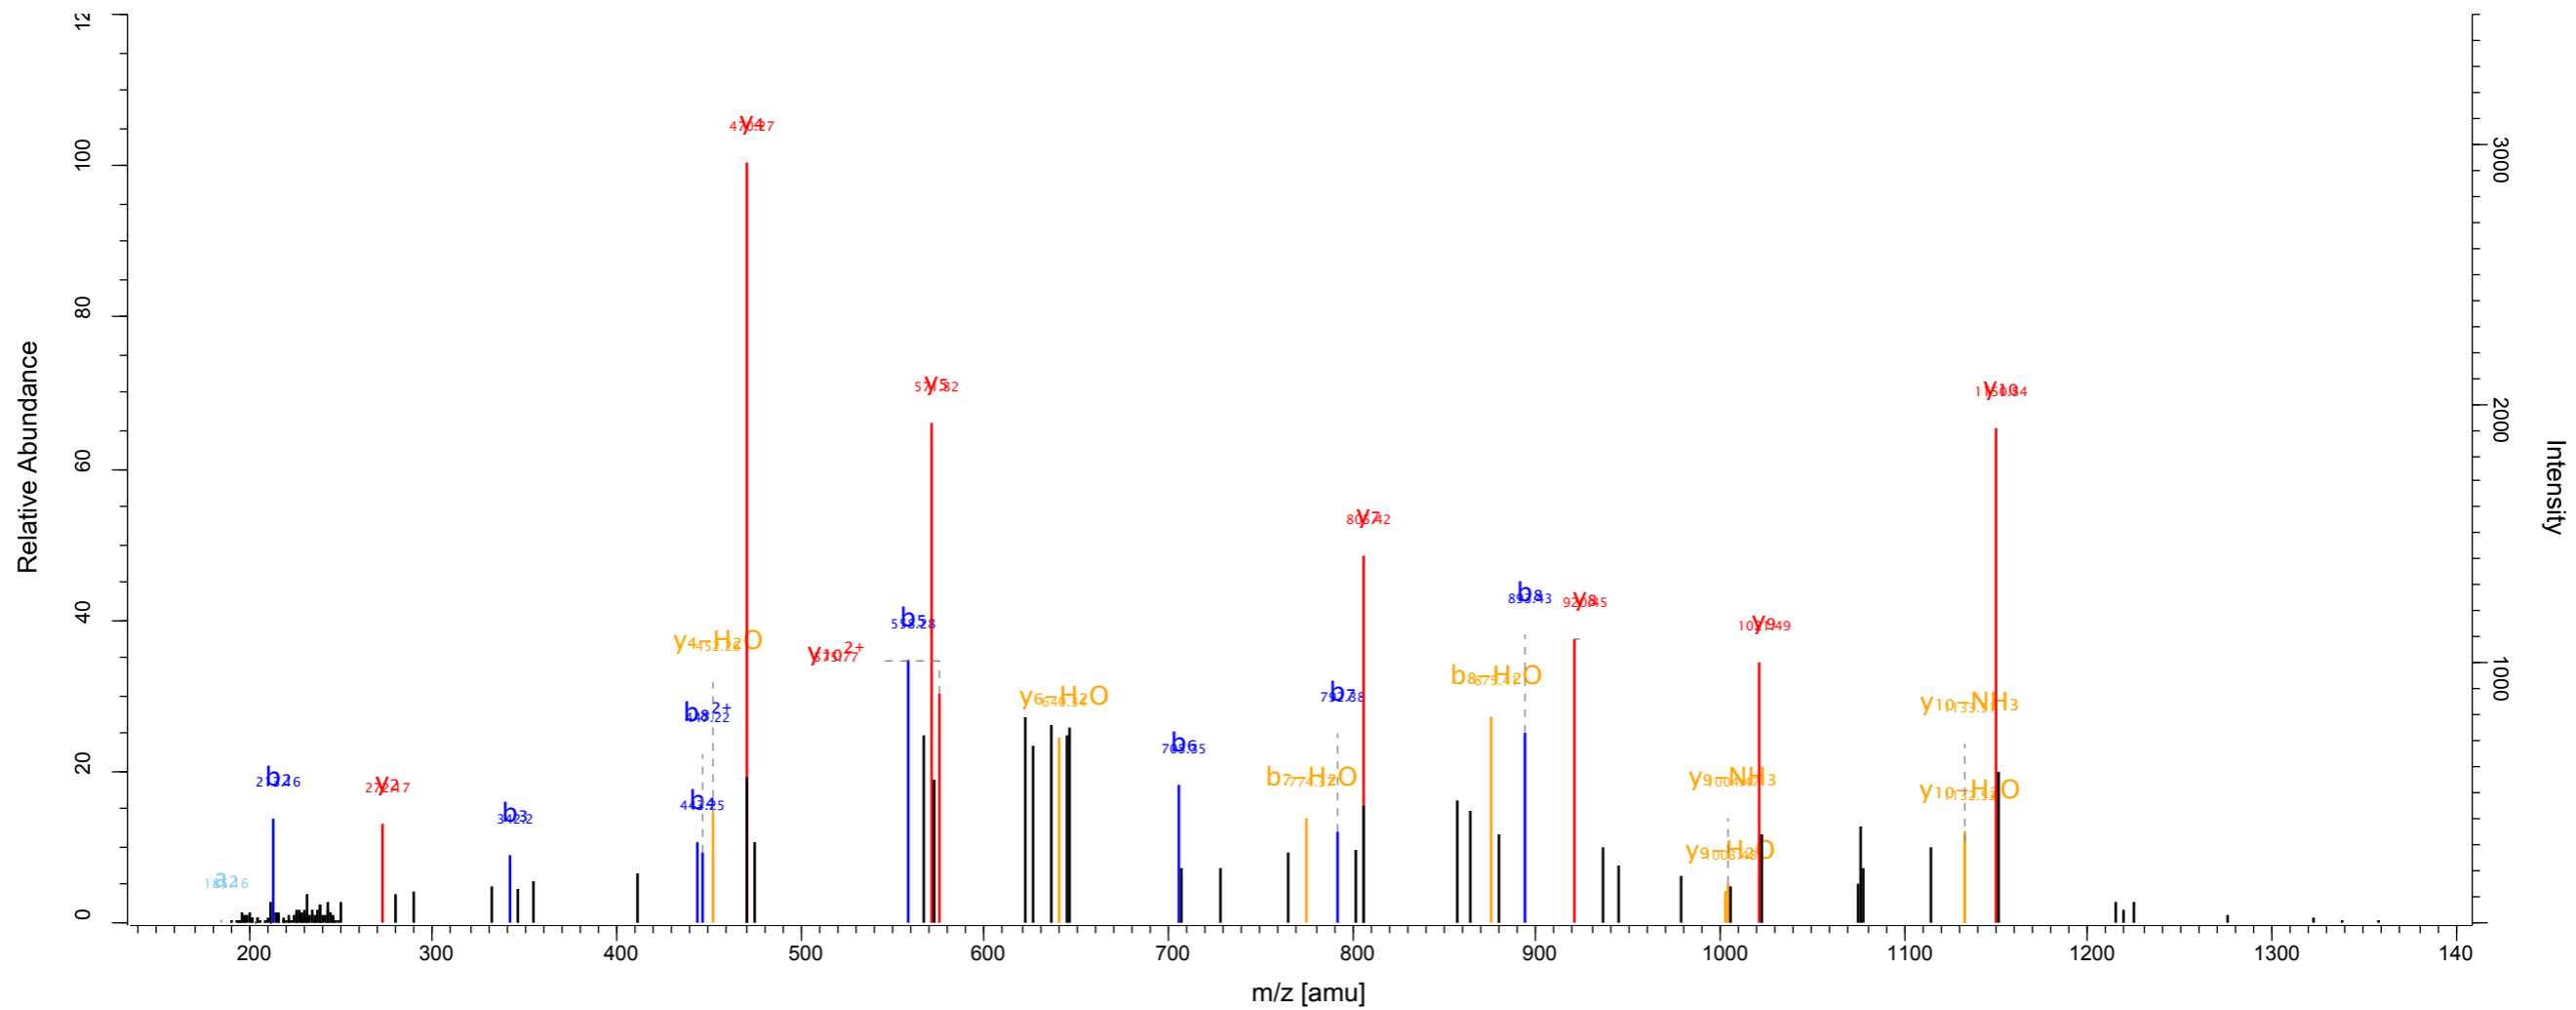

Scan number 1775 Raw file SKaraca\_LMB\_Reverse\_H3\_161011\_7\_rep1  
 Method ITMS; CID Pepti... 122.69

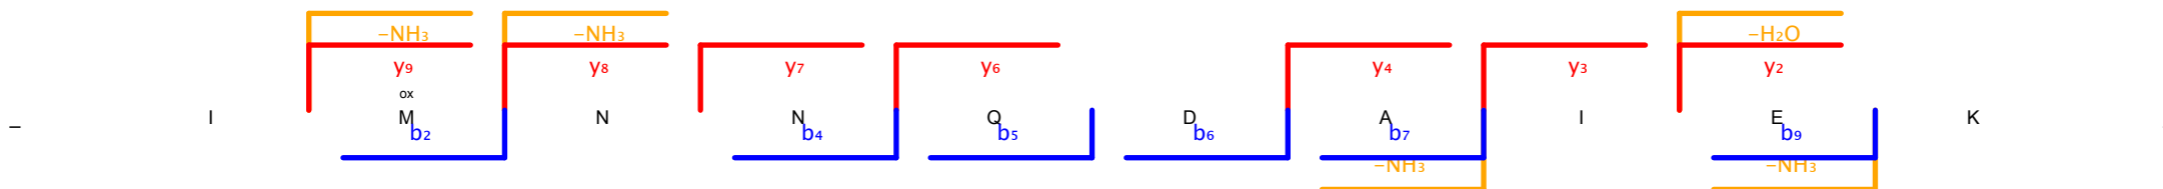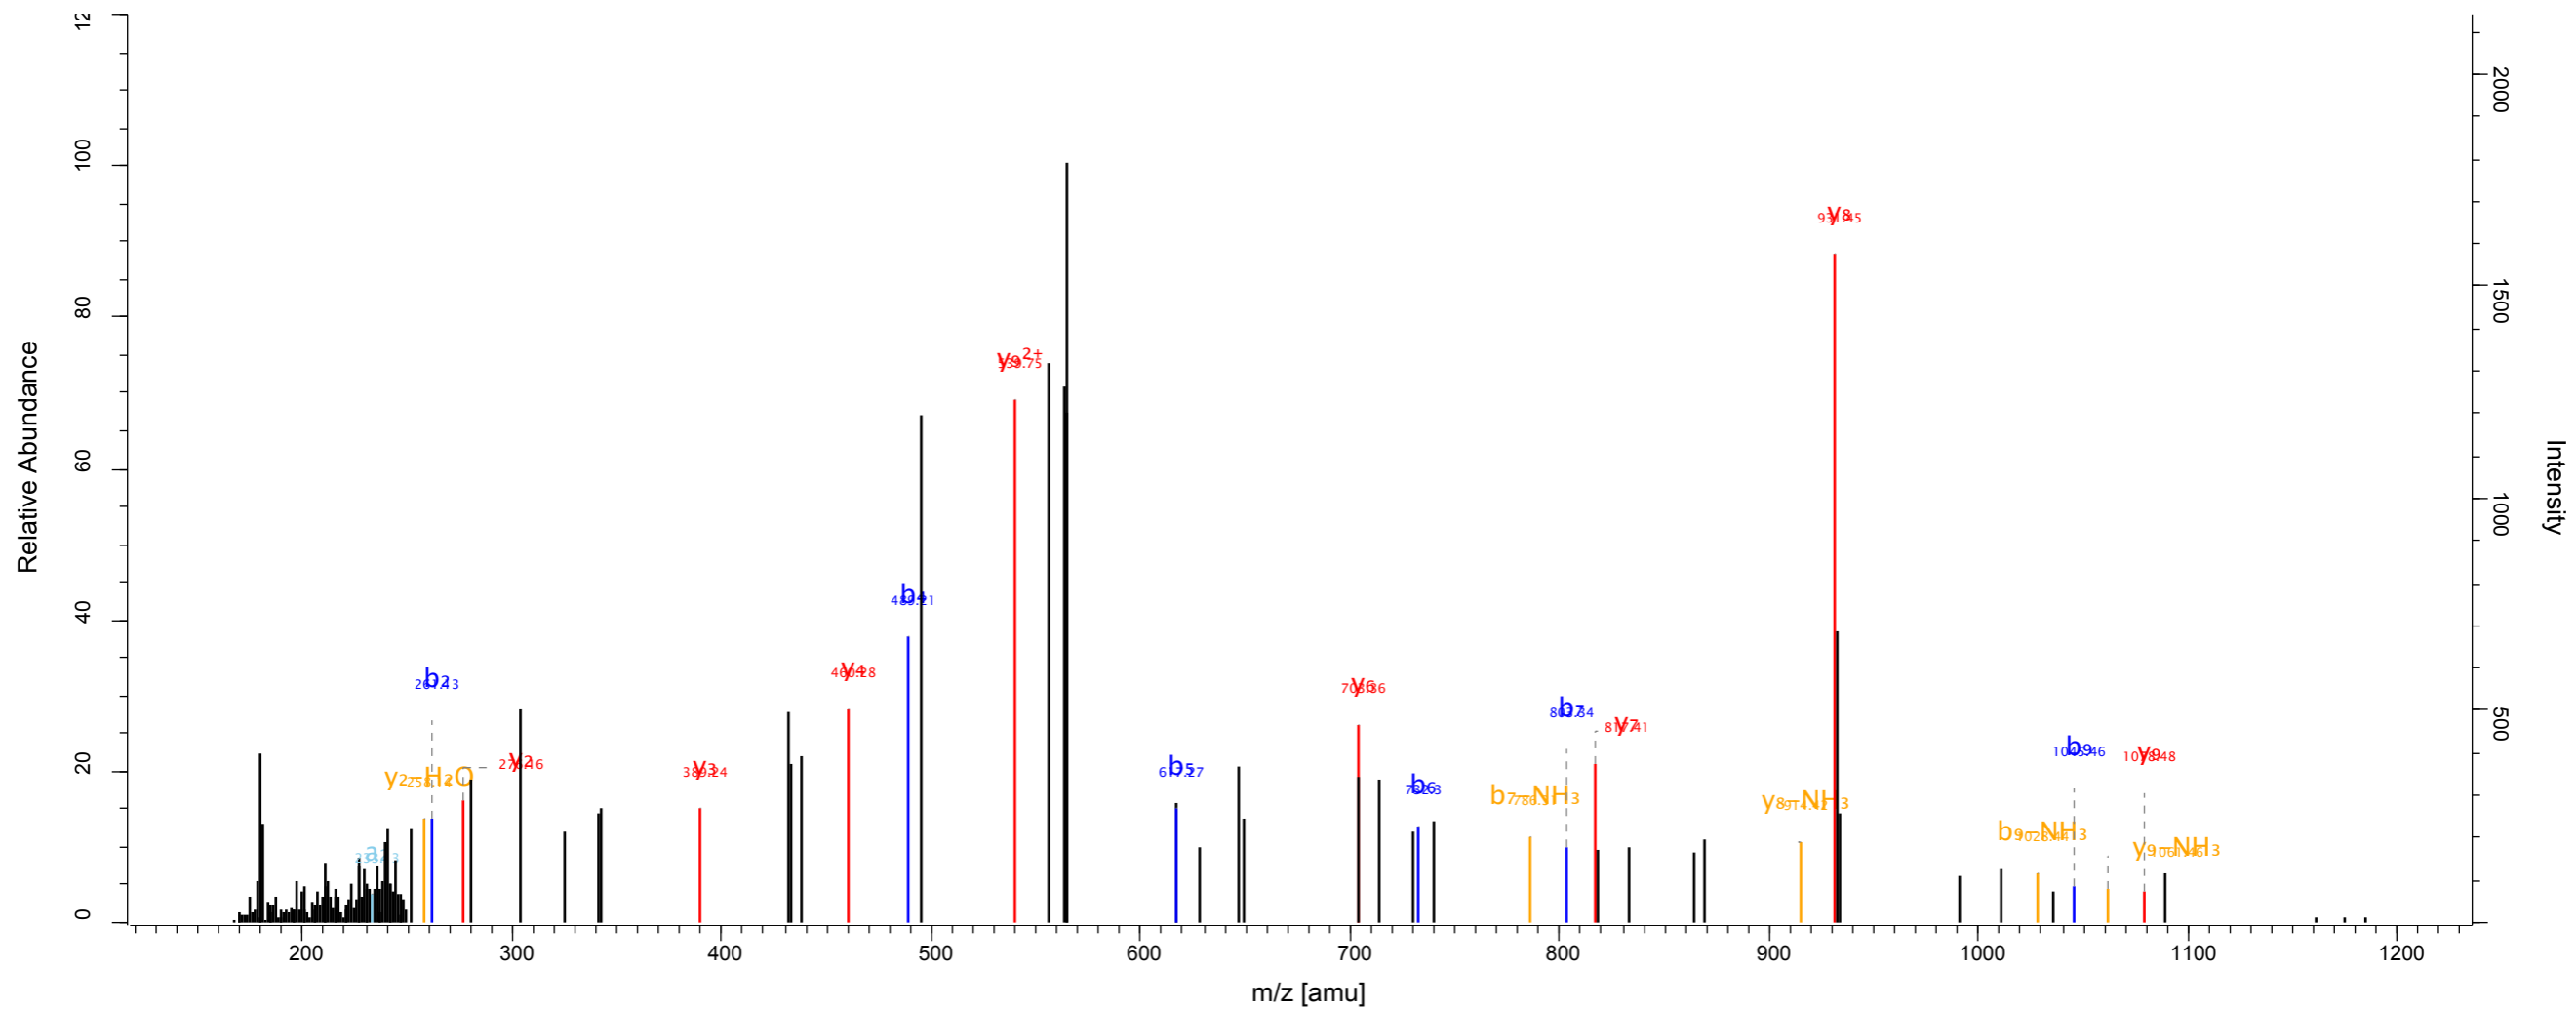

Scan number 8813 Raw file SKaraca\_LMB\_Reverse\_H3\_161011\_8\_rep1  
 Method ITMS; CID Pepti... 97.29

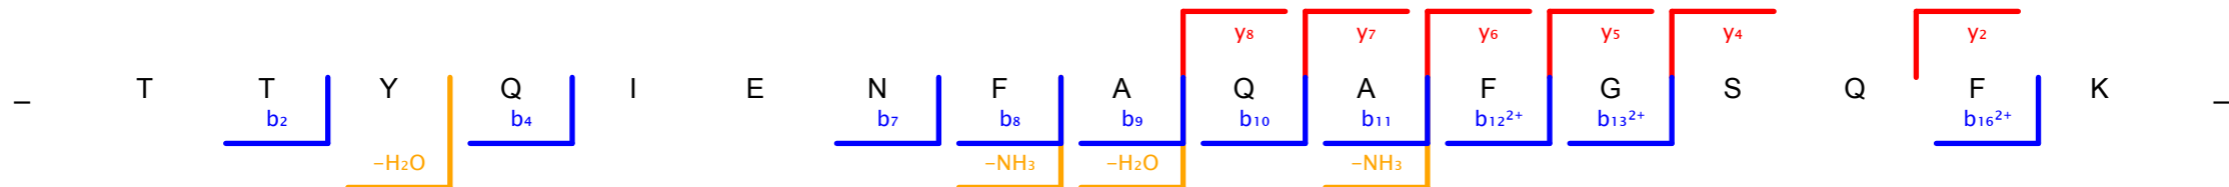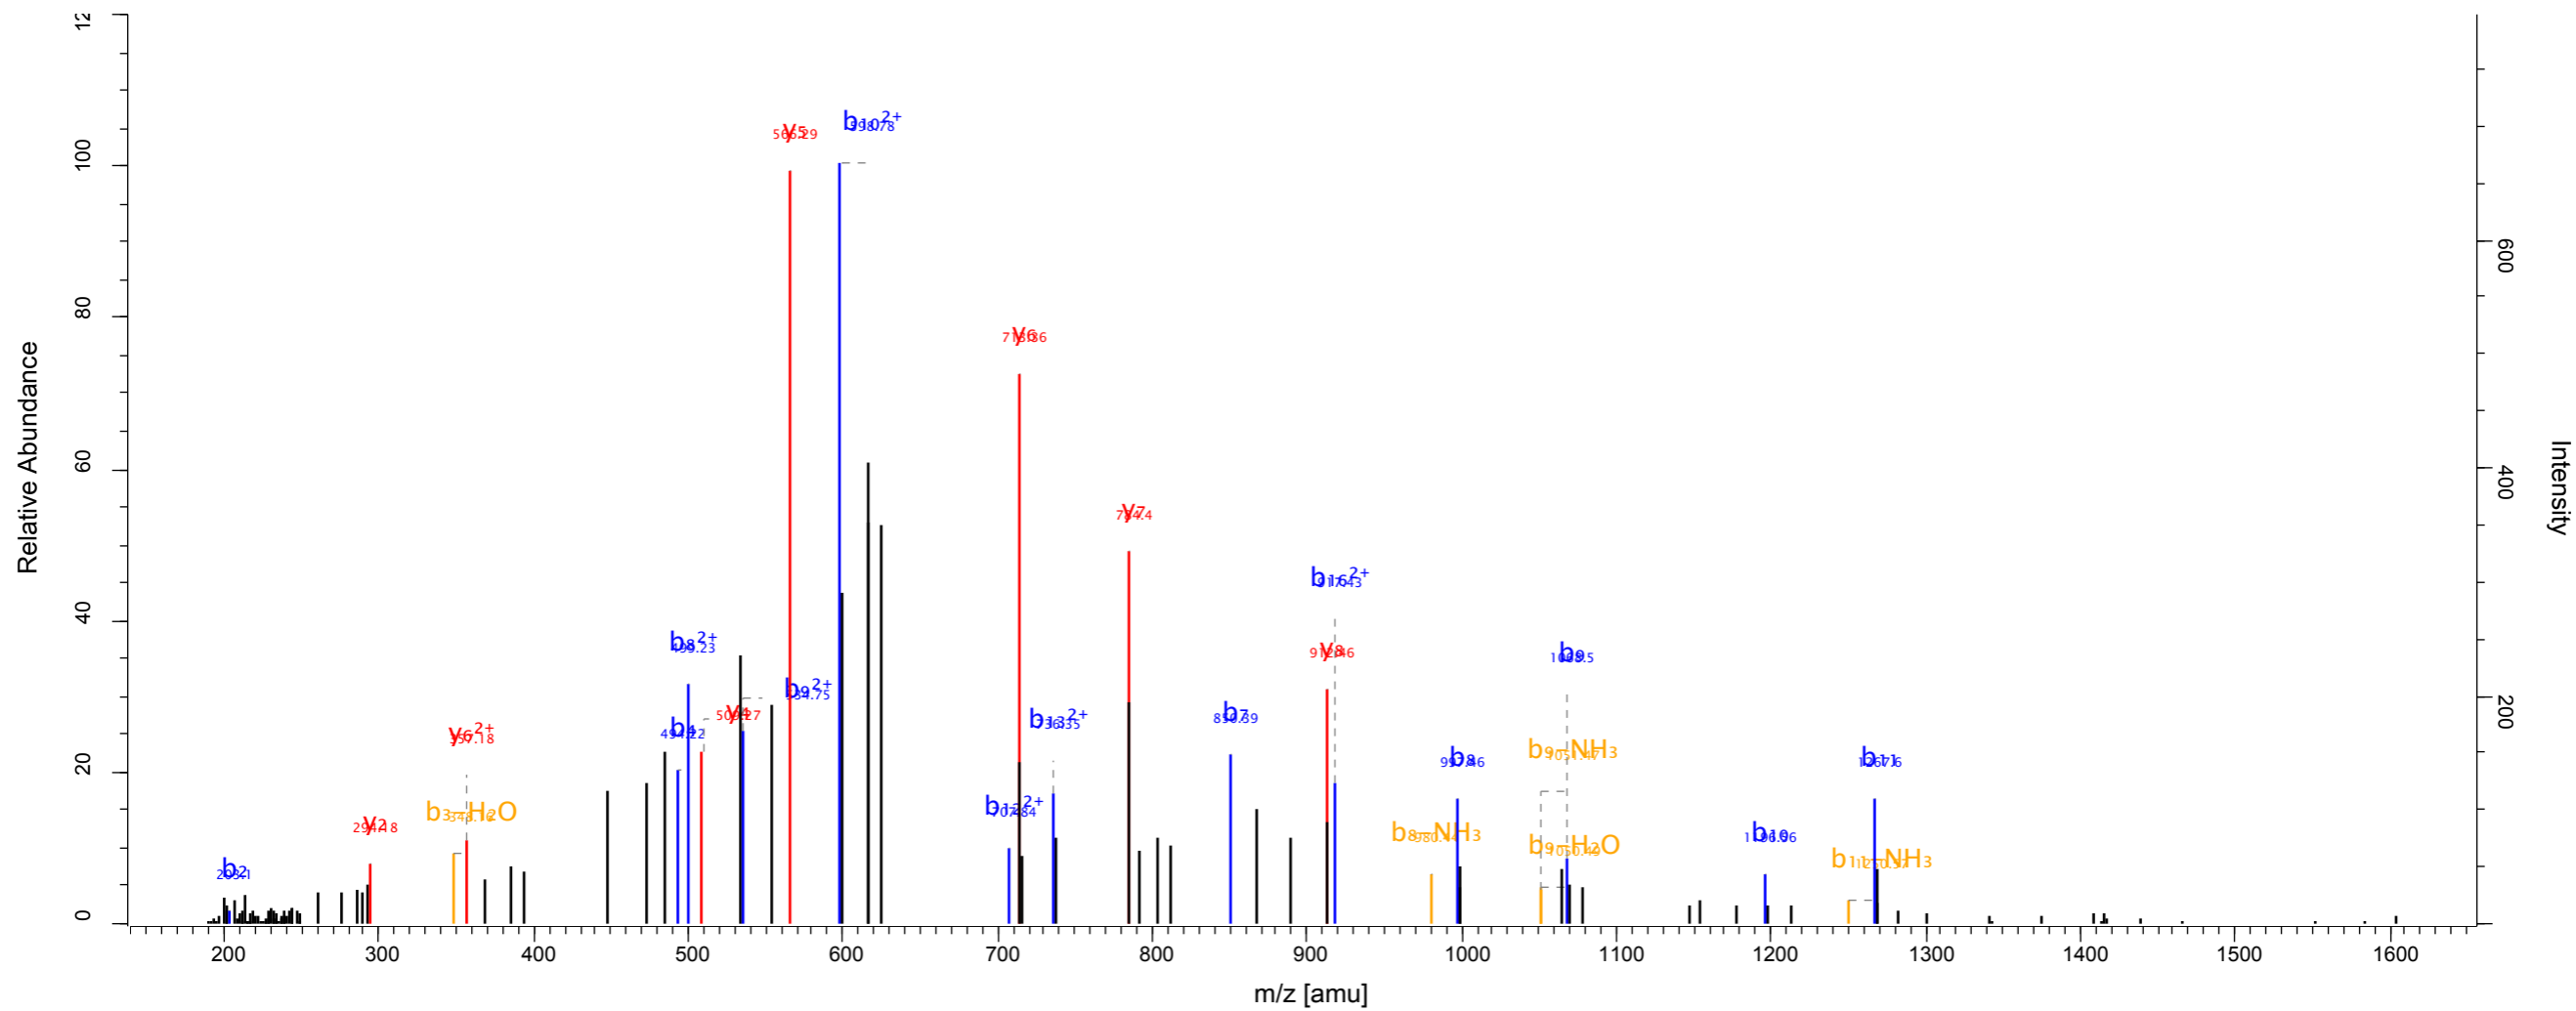

Scan number 4725 Raw file SKaraca\_LMB\_Reverse\_H3\_161011\_8\_rep2  
 Method ITMS; CID Pepti... 170.78

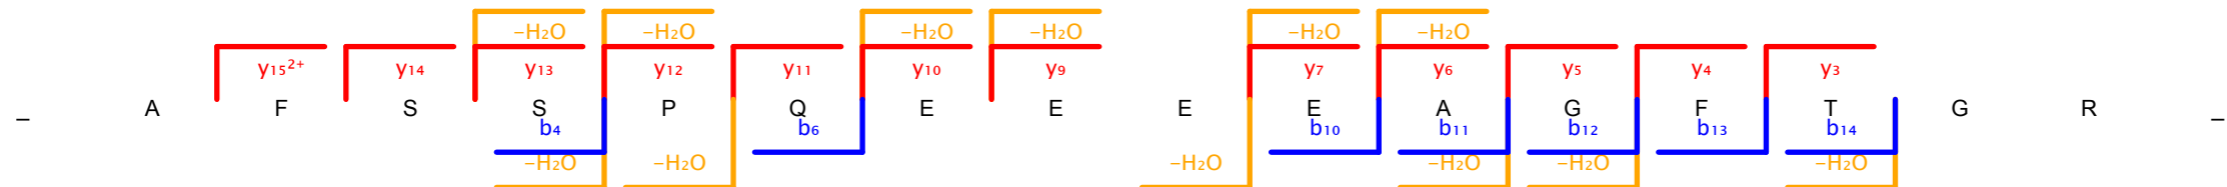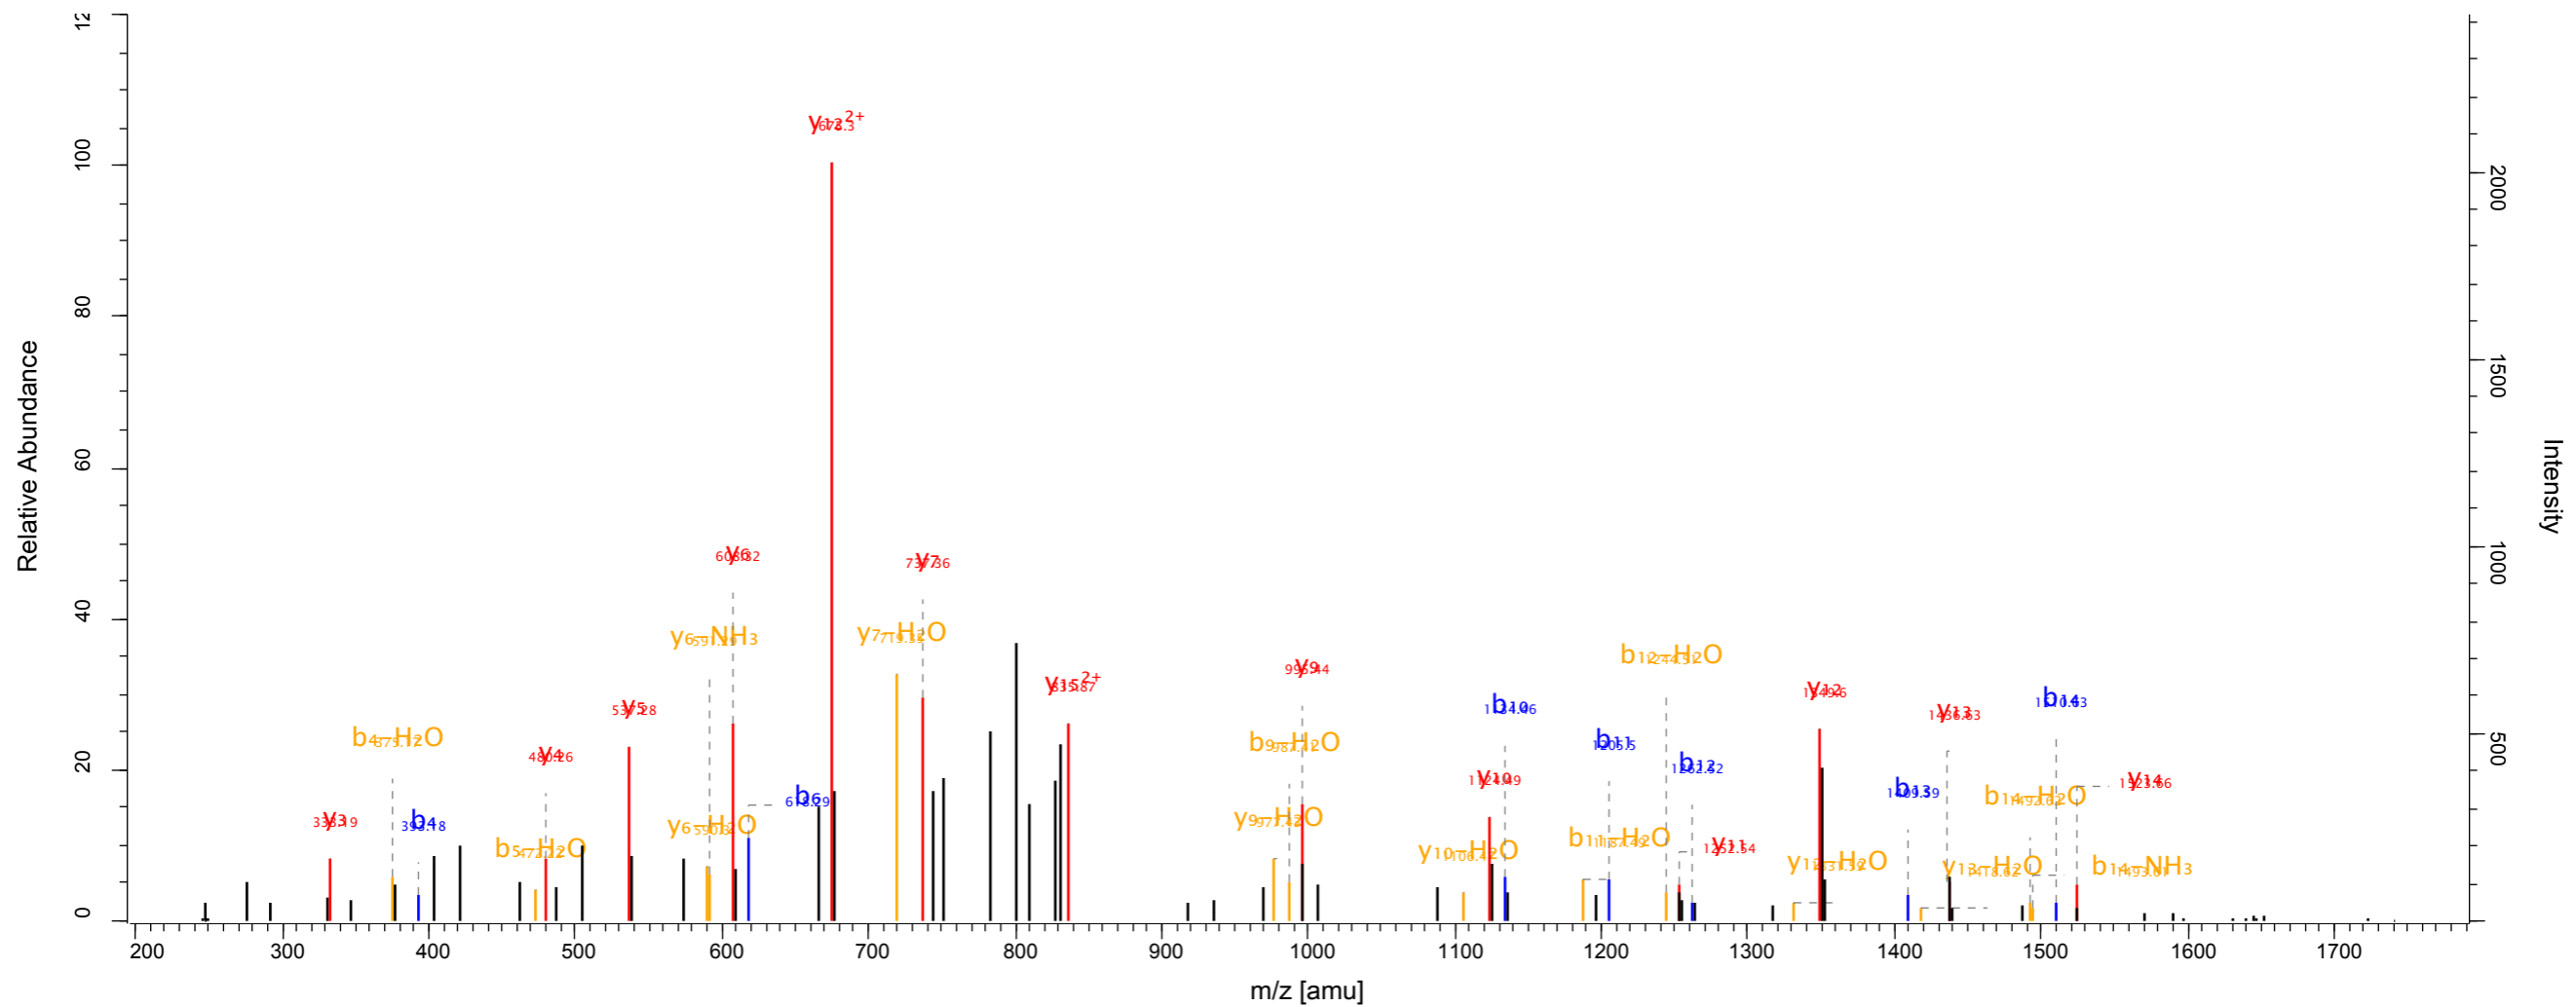



|             |           |          |                                      |
|-------------|-----------|----------|--------------------------------------|
| Scan number | 6553      | Raw file | SKaraca_LMB_Reverse_H3_161011_8_rep2 |
| Method      | ITMS; CID | Pepti... | 125.98                               |

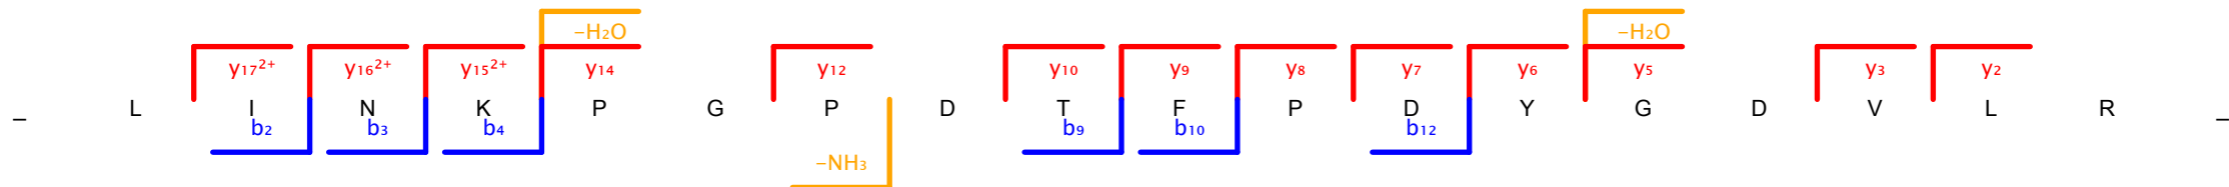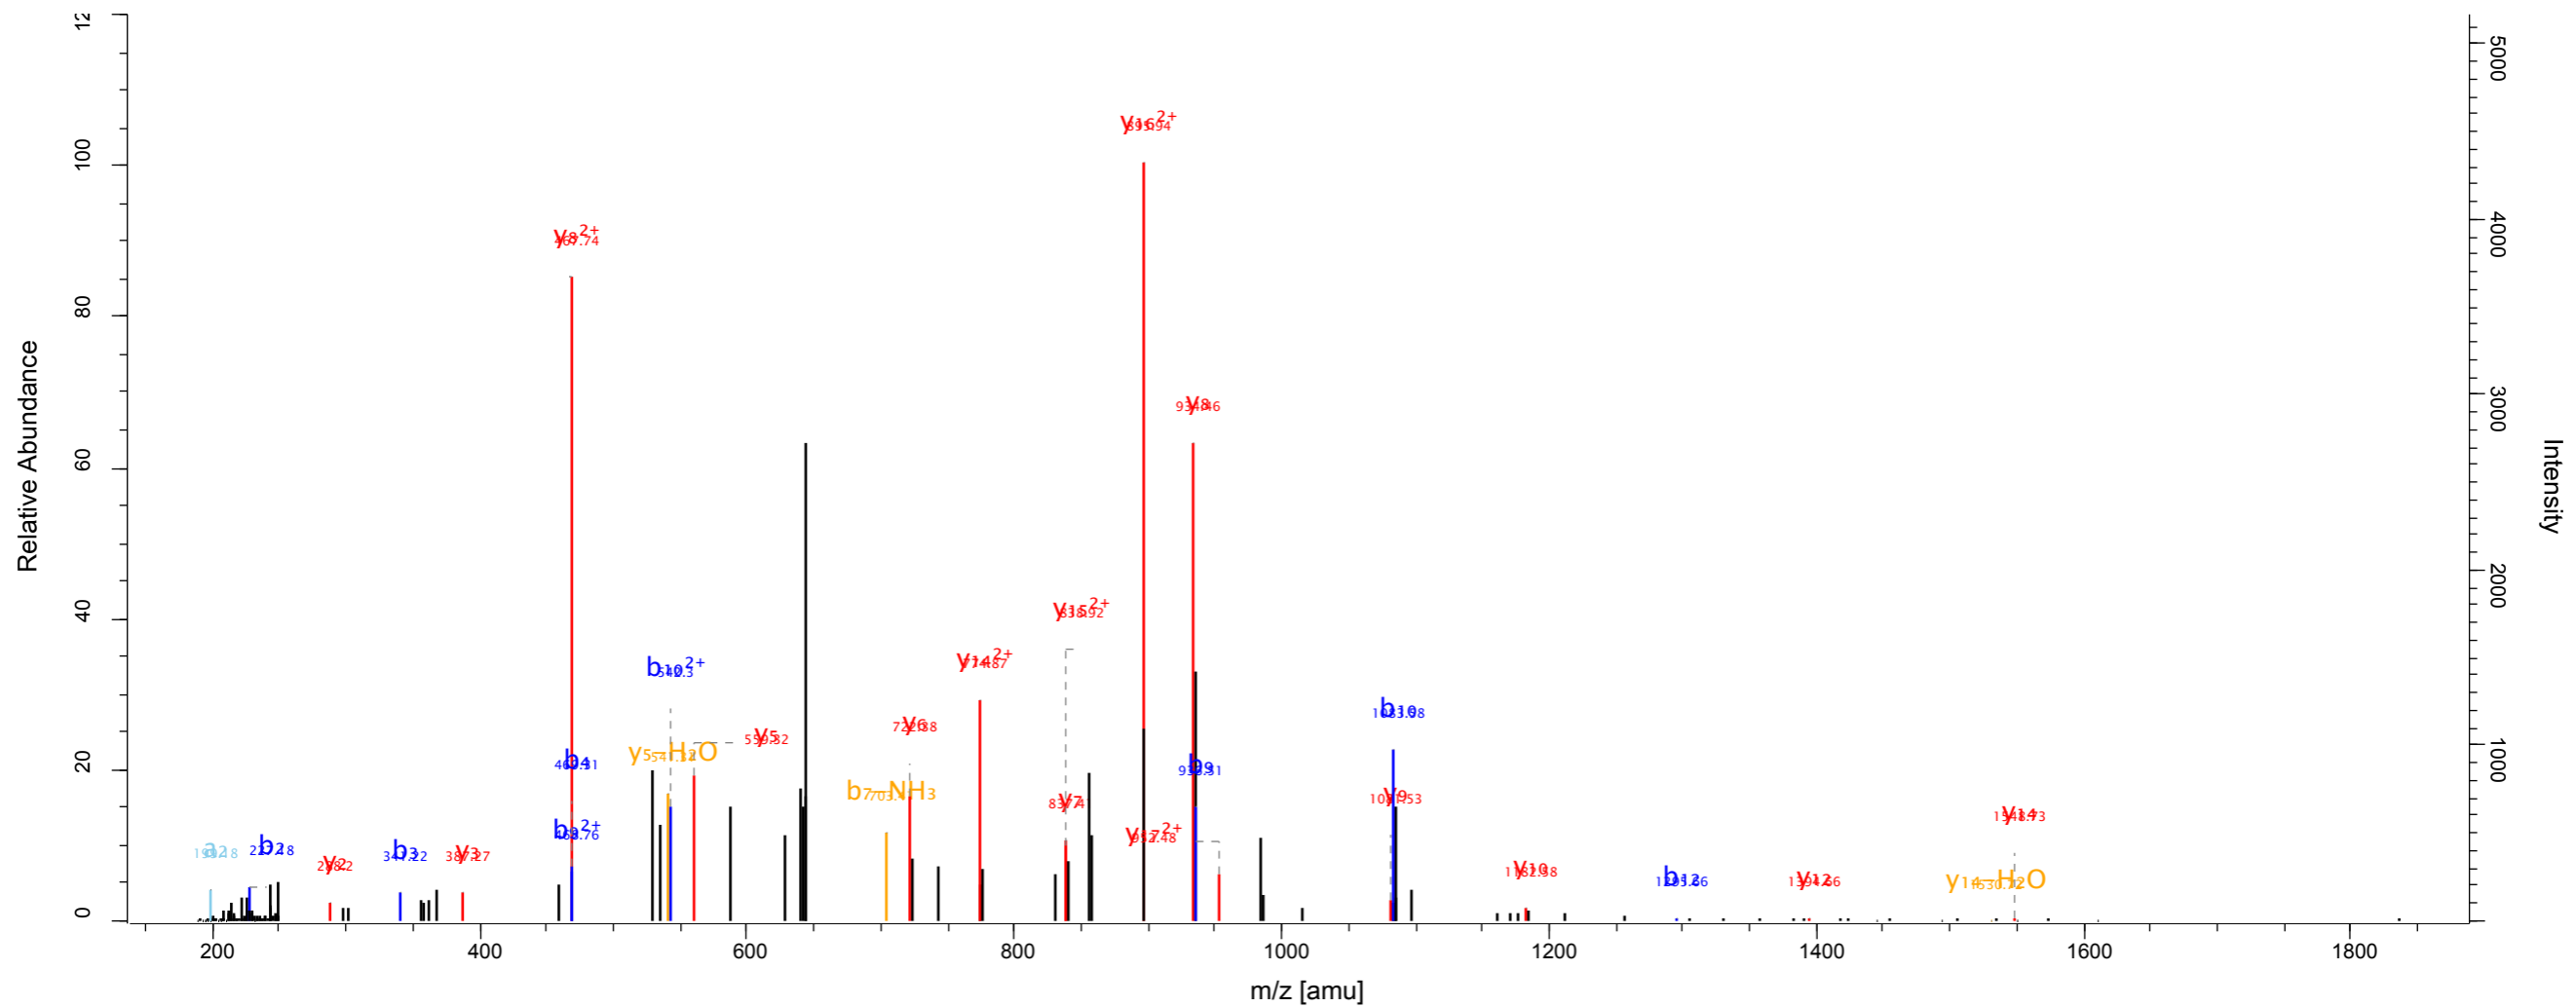

Scan number 1160 Raw file SKaraca\_LMB\_Reverse\_H3\_161011\_9\_rep2  
 Method ITMS; CID Pepti... 131.82

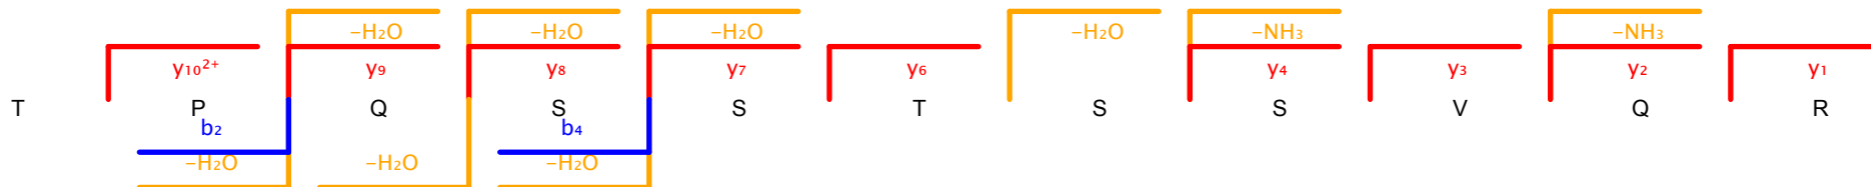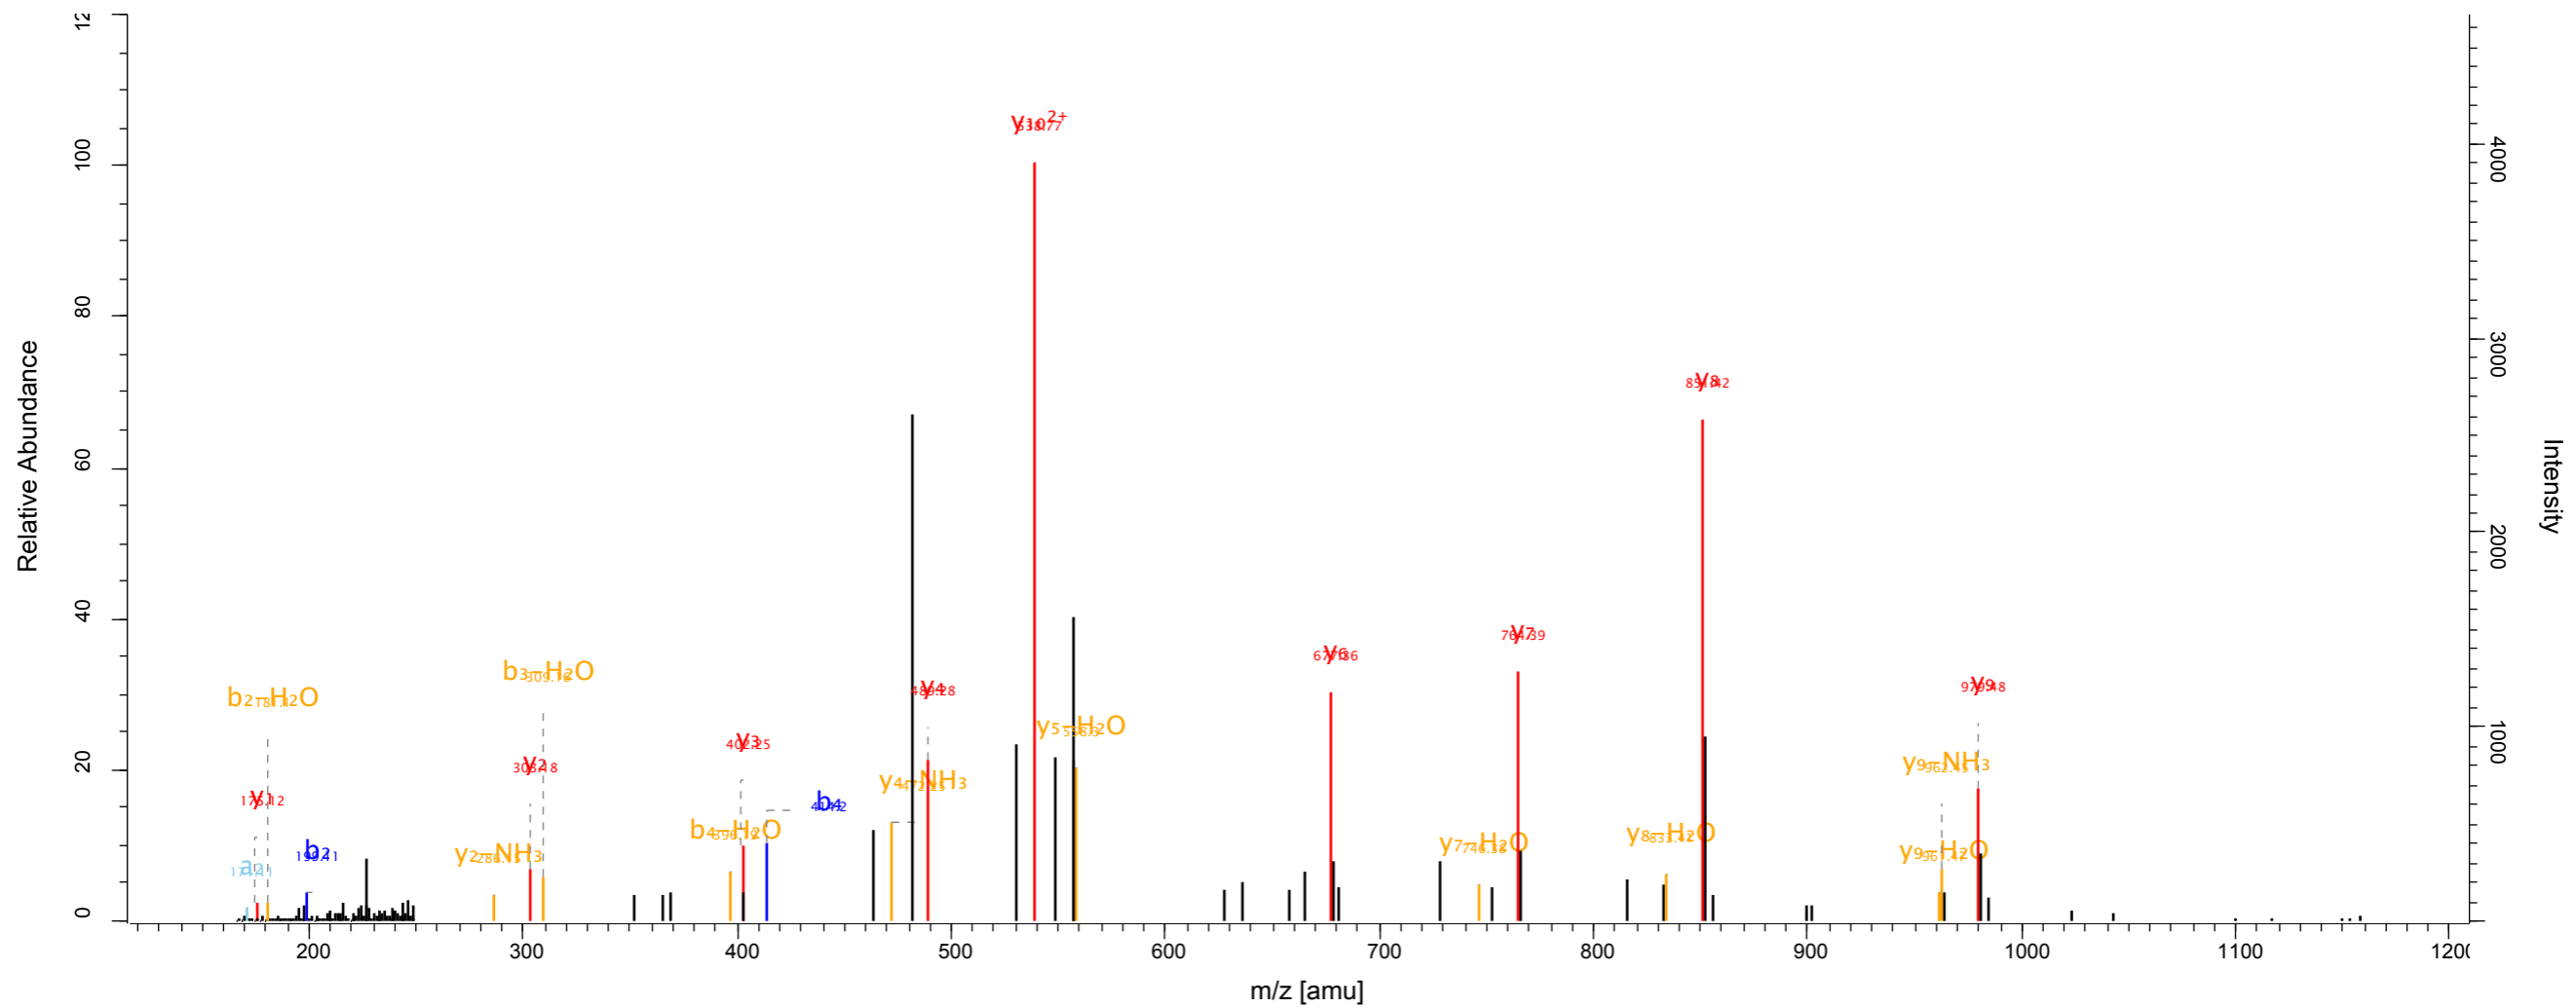

Scan number 8755 Raw file SKaraca\_LMB\_TCE\_Forward\_10\_191011\_rep1  
 Method ITMS; CID Pepti... 136.39

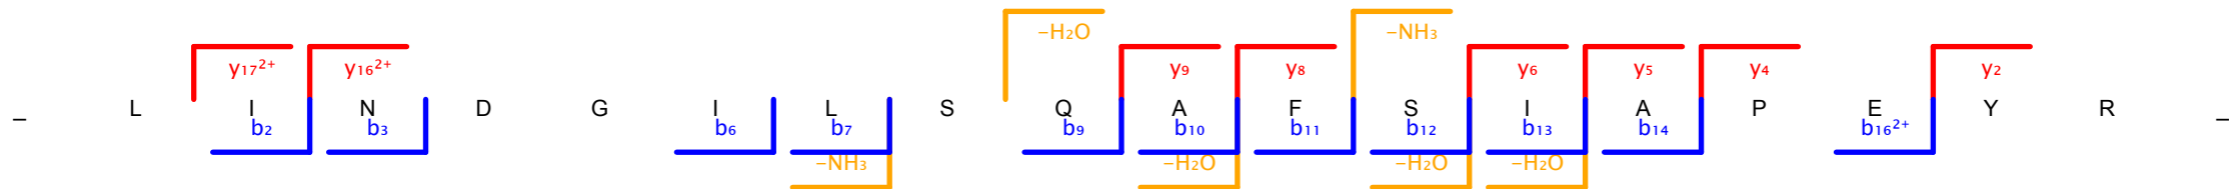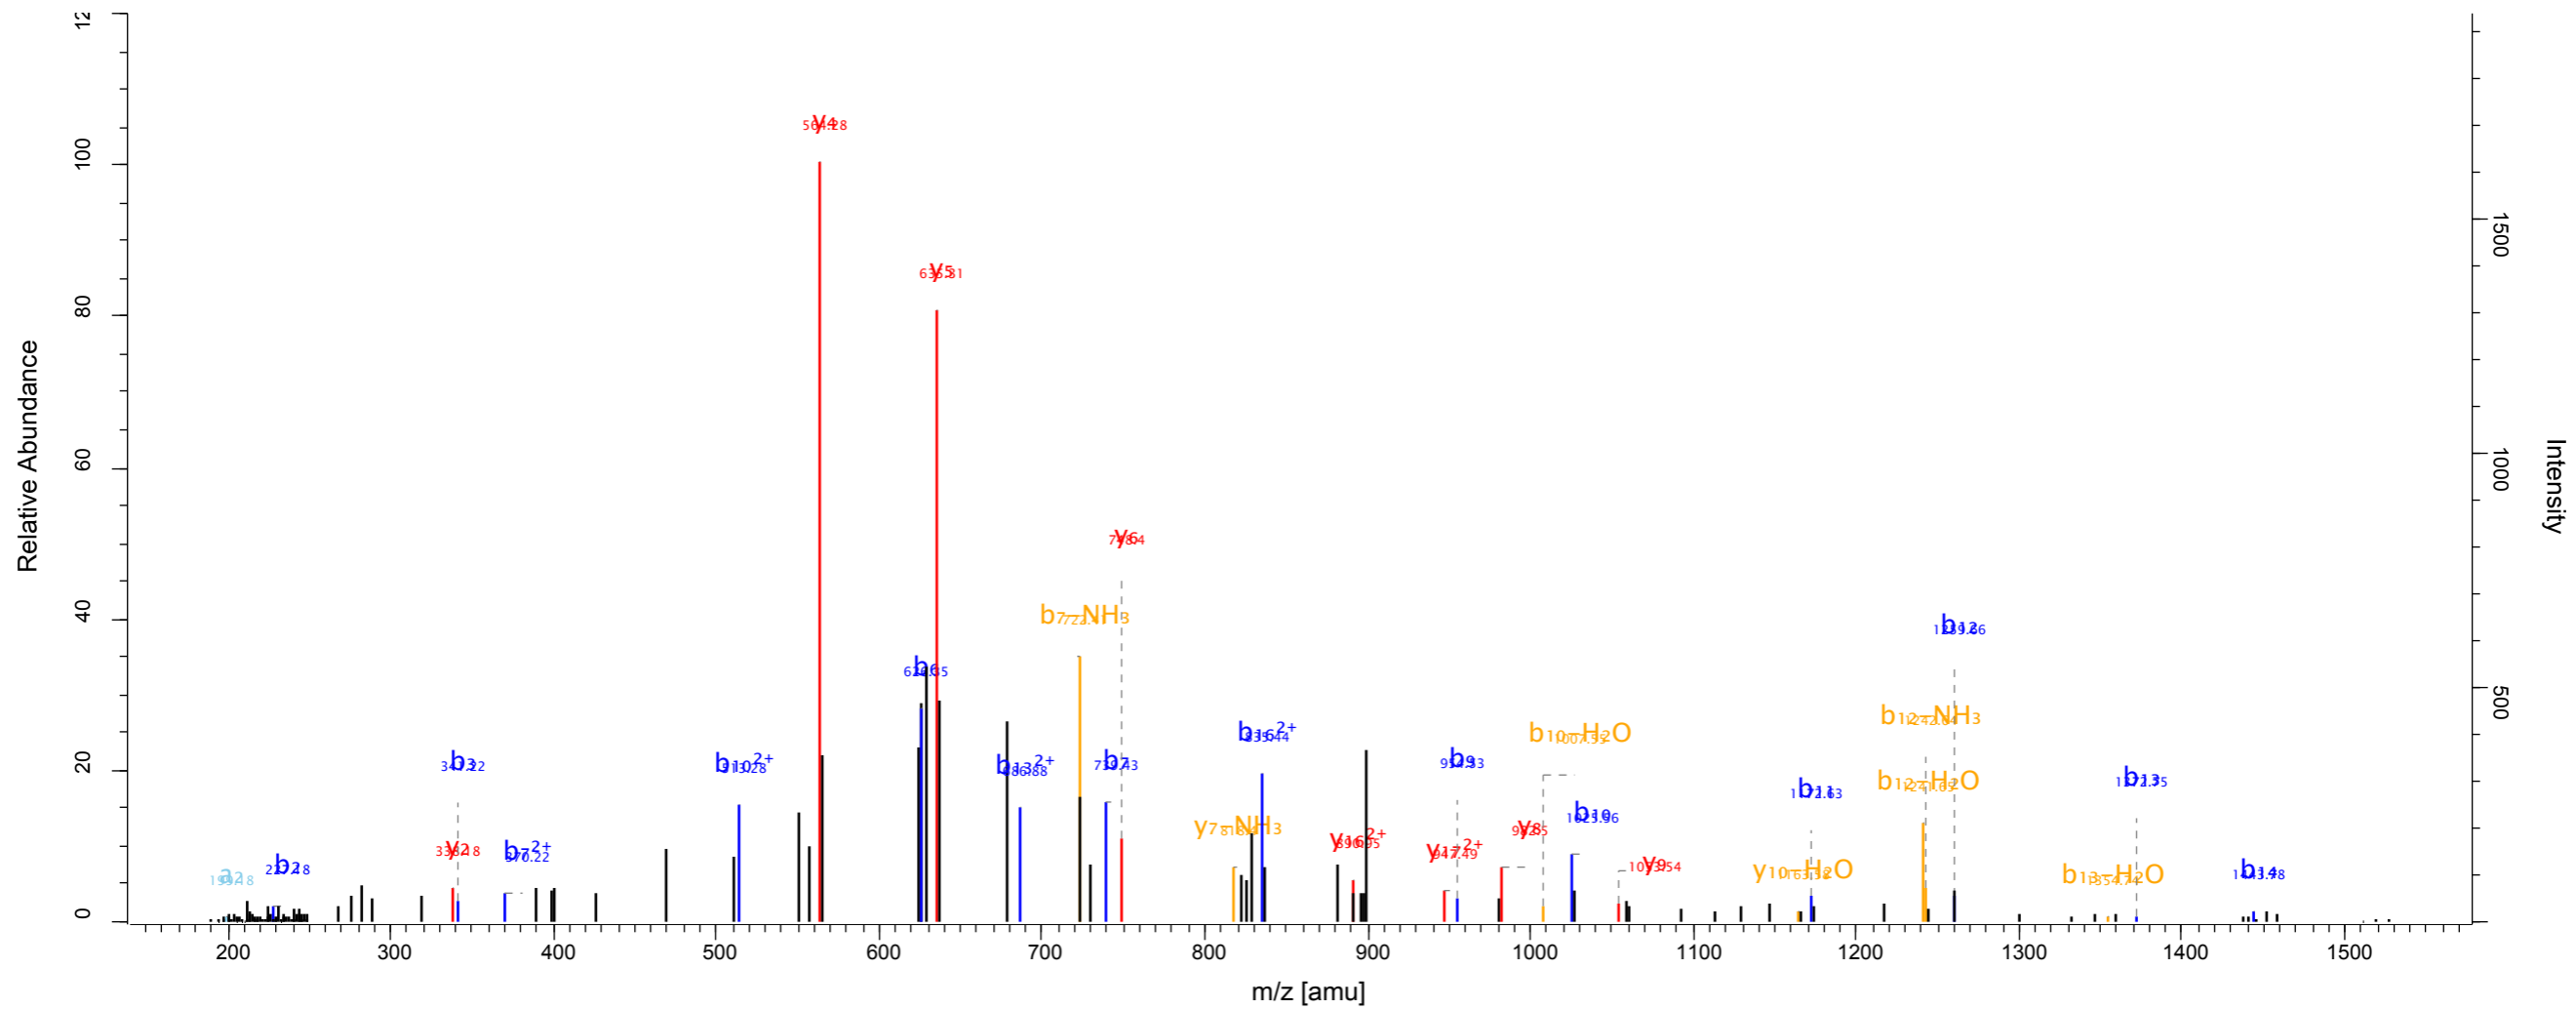

Scan number 9270 Raw file SKaraca\_LMB\_TCE\_Forward\_10\_191011\_rep1  
 Method ITMS; CID Pepti... 236.35

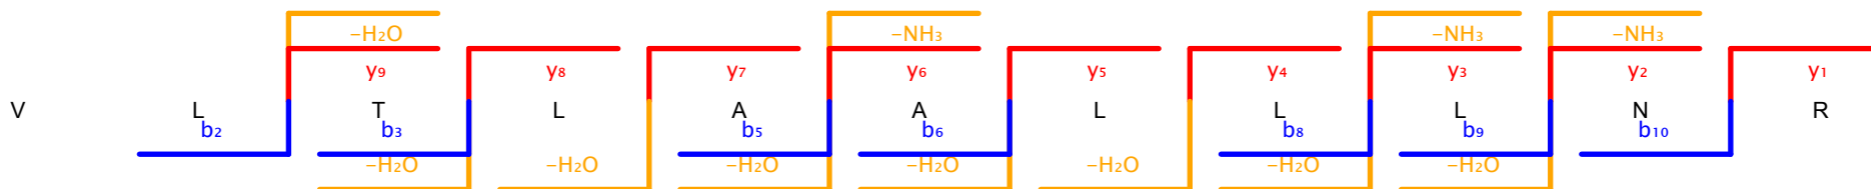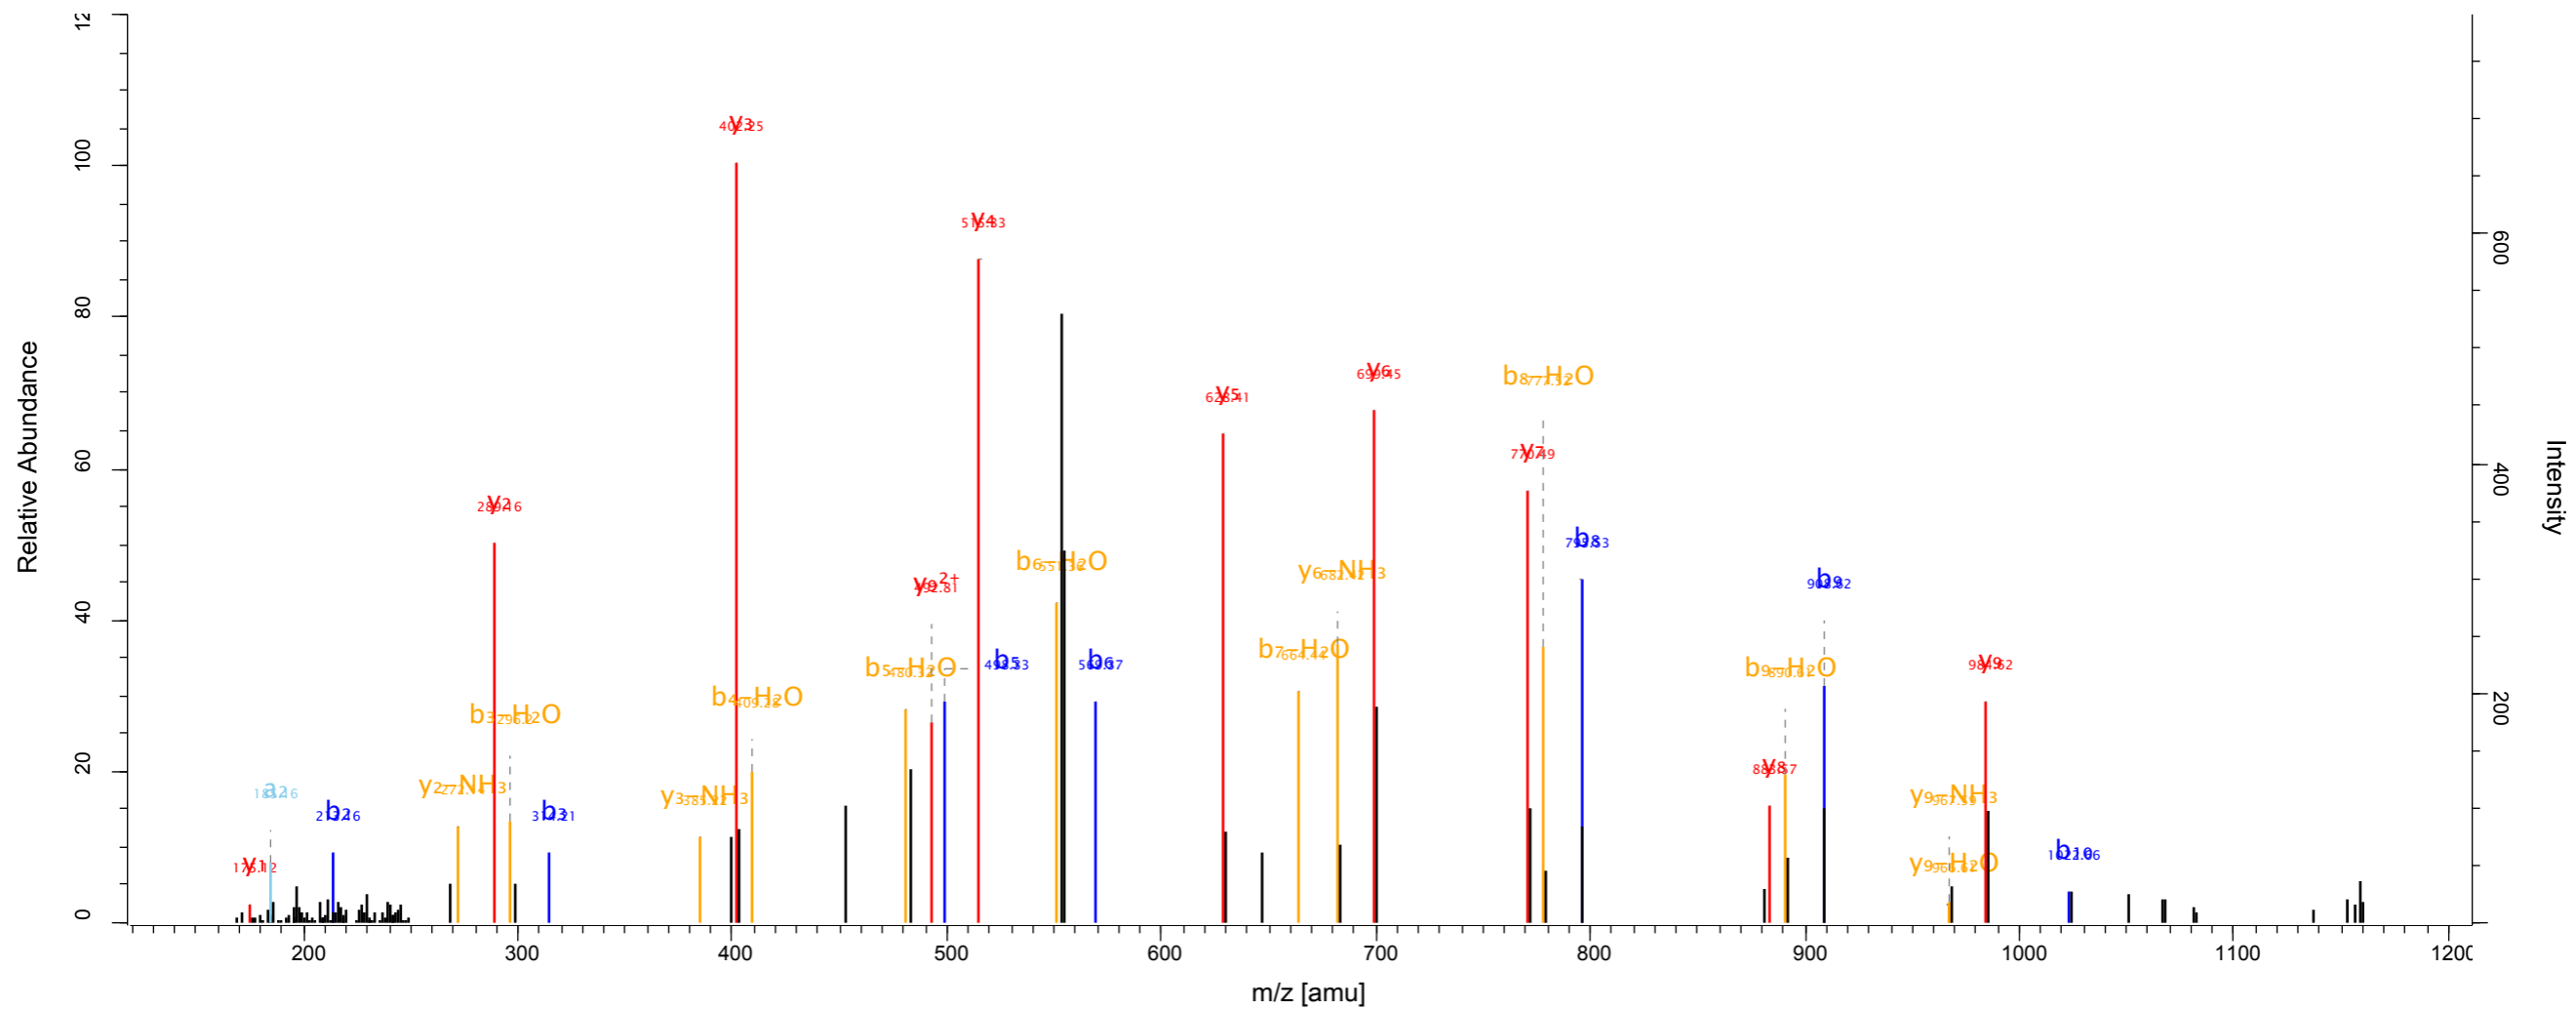

Scan number 9957 Raw file SKaraca\_LMB\_TCE\_Forward\_10\_191011\_rep1  
 Method ITMS; CID Pepti... 154.6

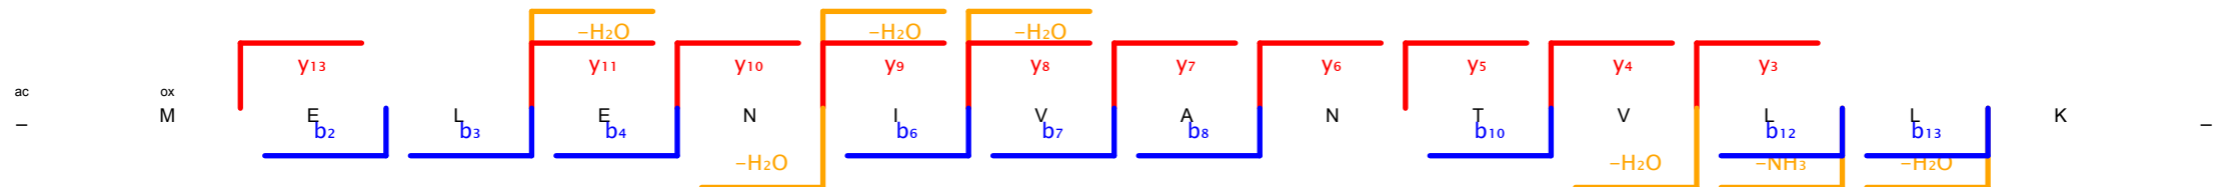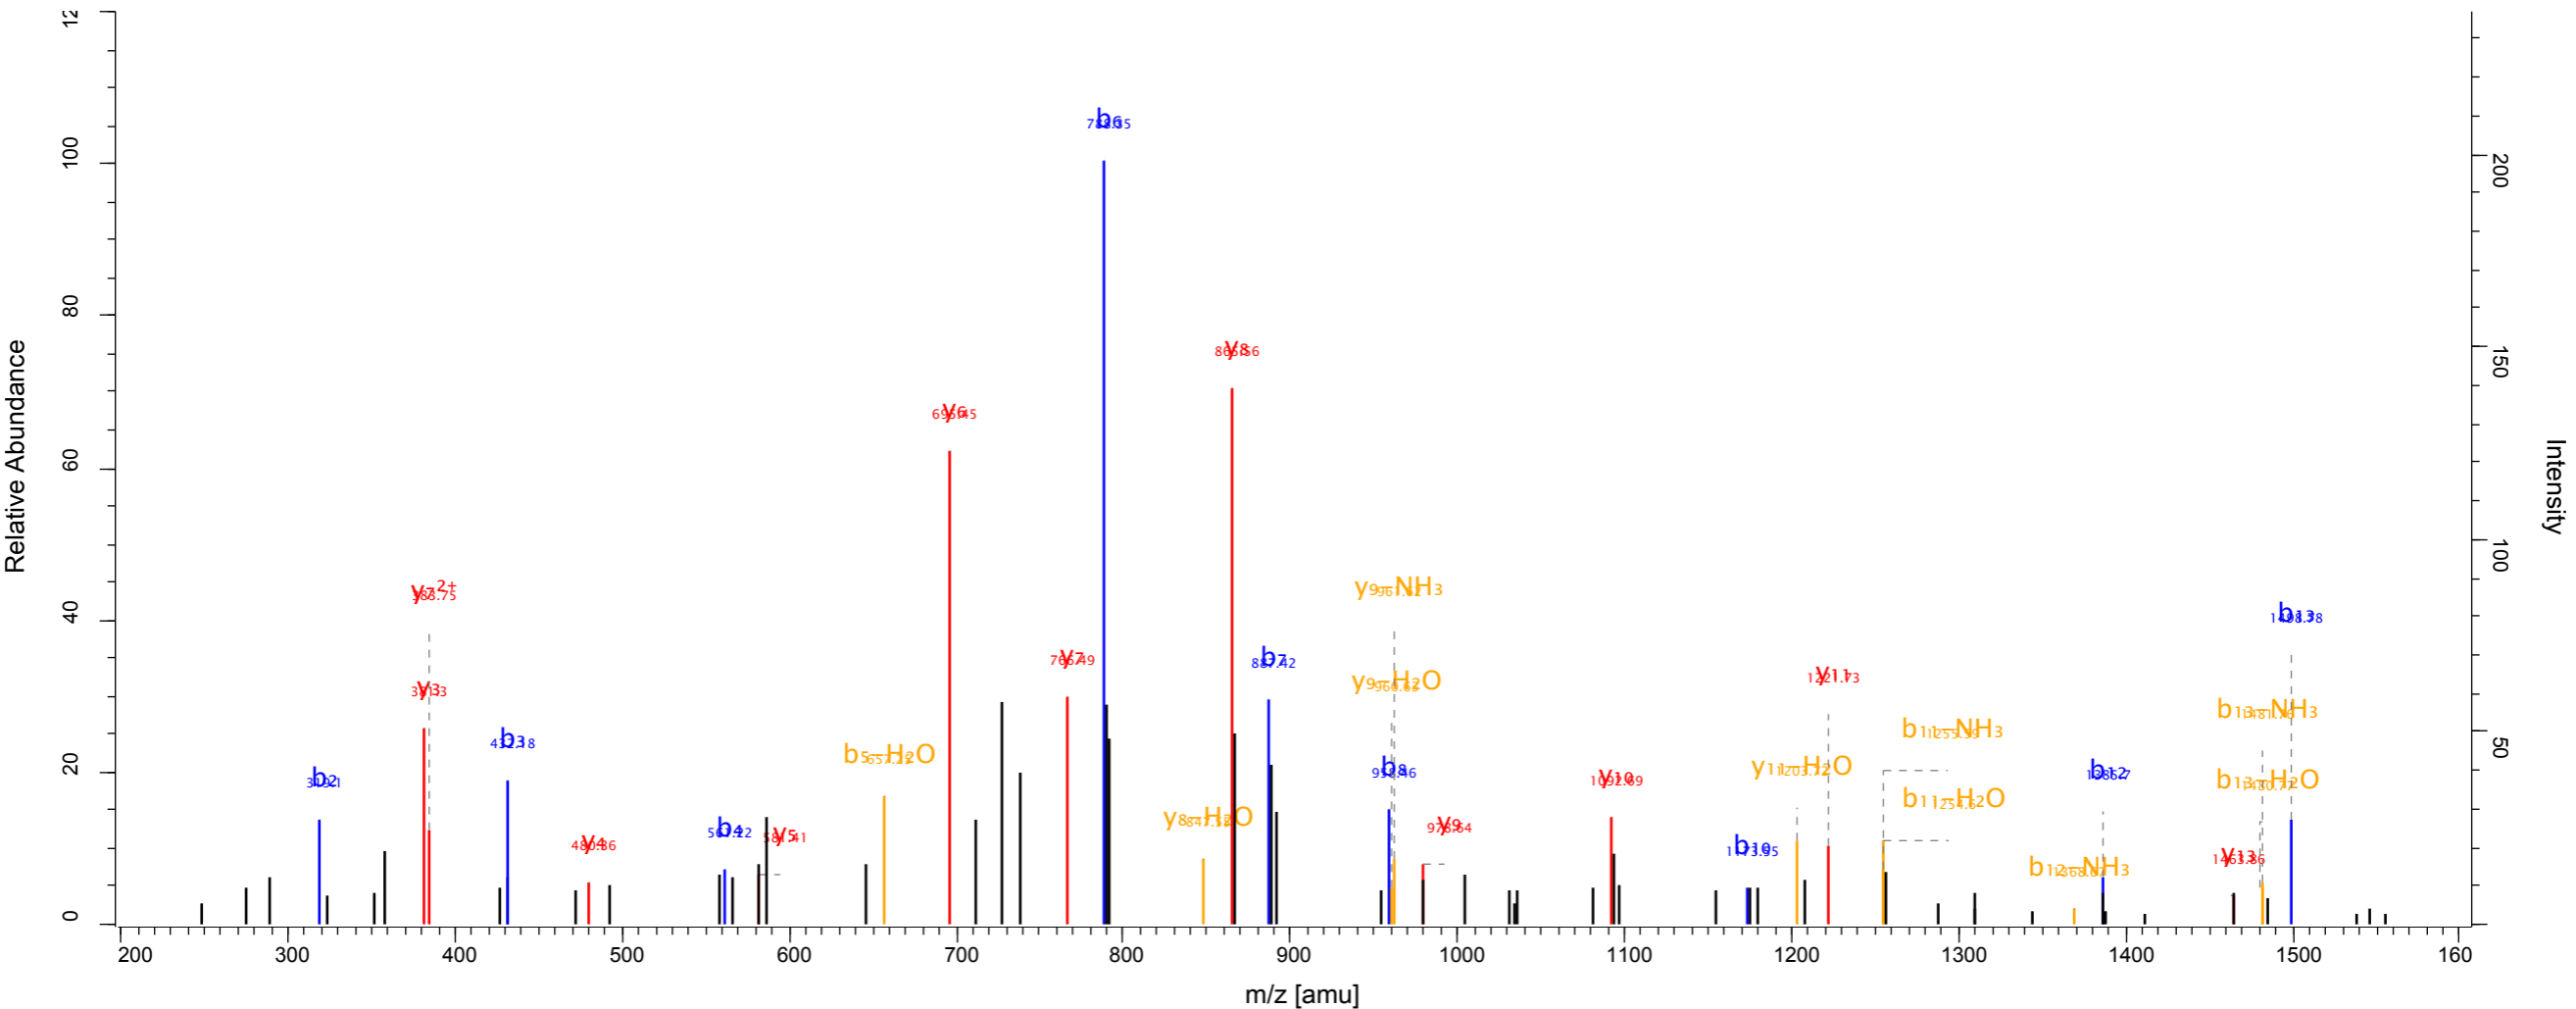

Scan number 1335 Raw file SKaraca\_LMB\_TCE\_Forward\_10\_191011\_rep2  
 Method ITMS; CID Pepti... 102.29

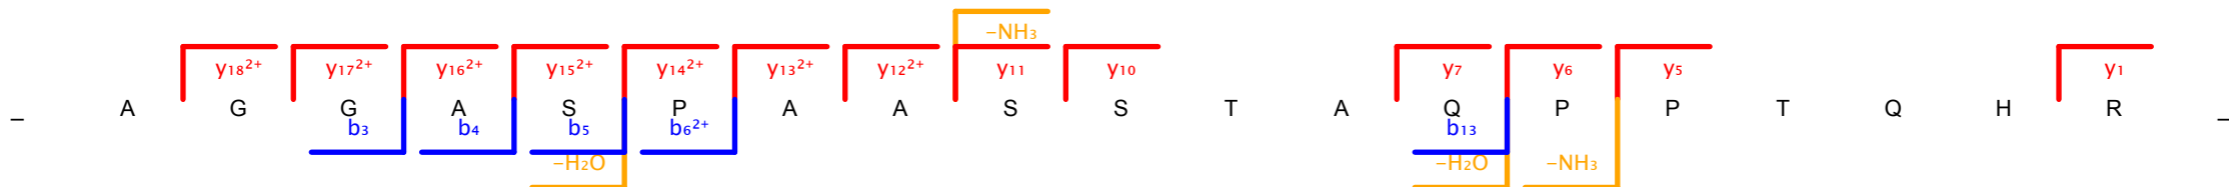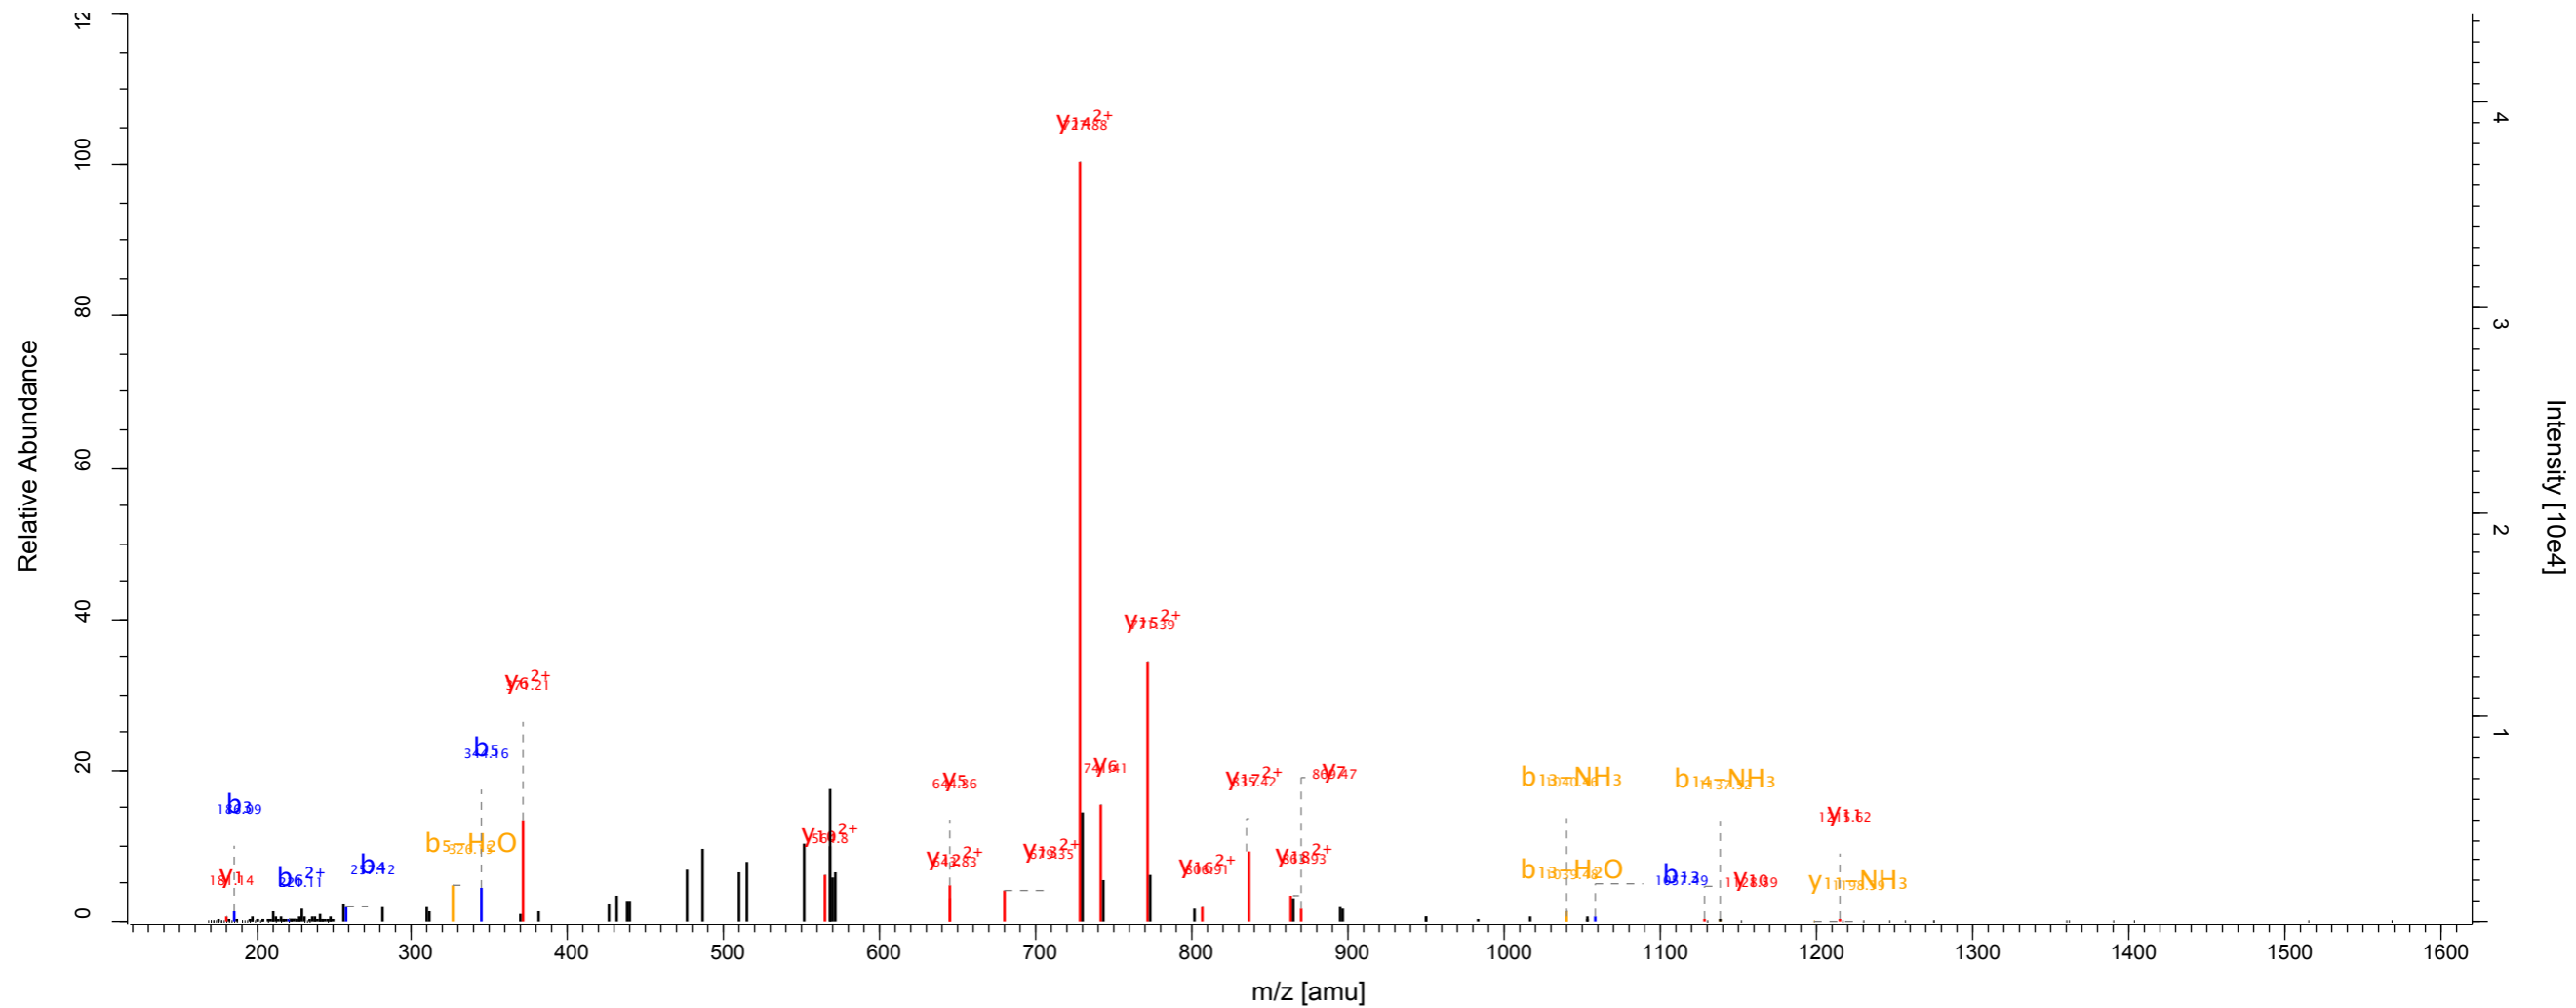

Scan number 2476 Raw file SKaraca\_LMB\_TCE\_Forward\_10\_191011\_rep2  
Method ITMS; CID Pepti... 232.28

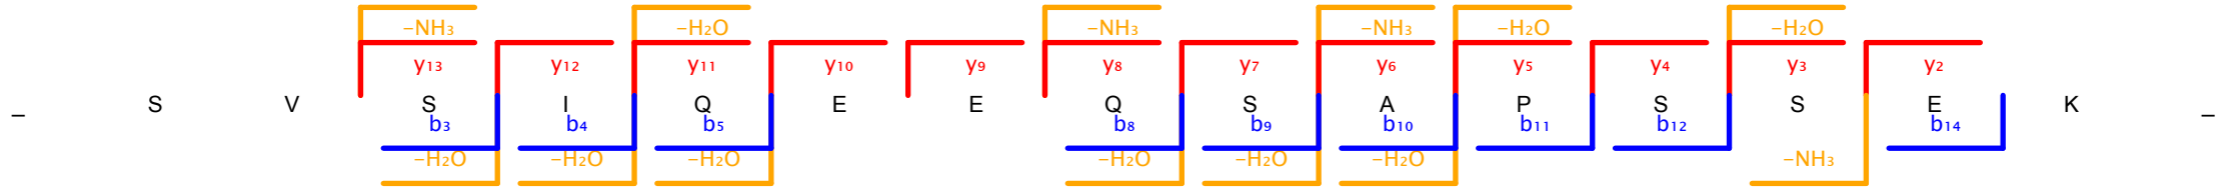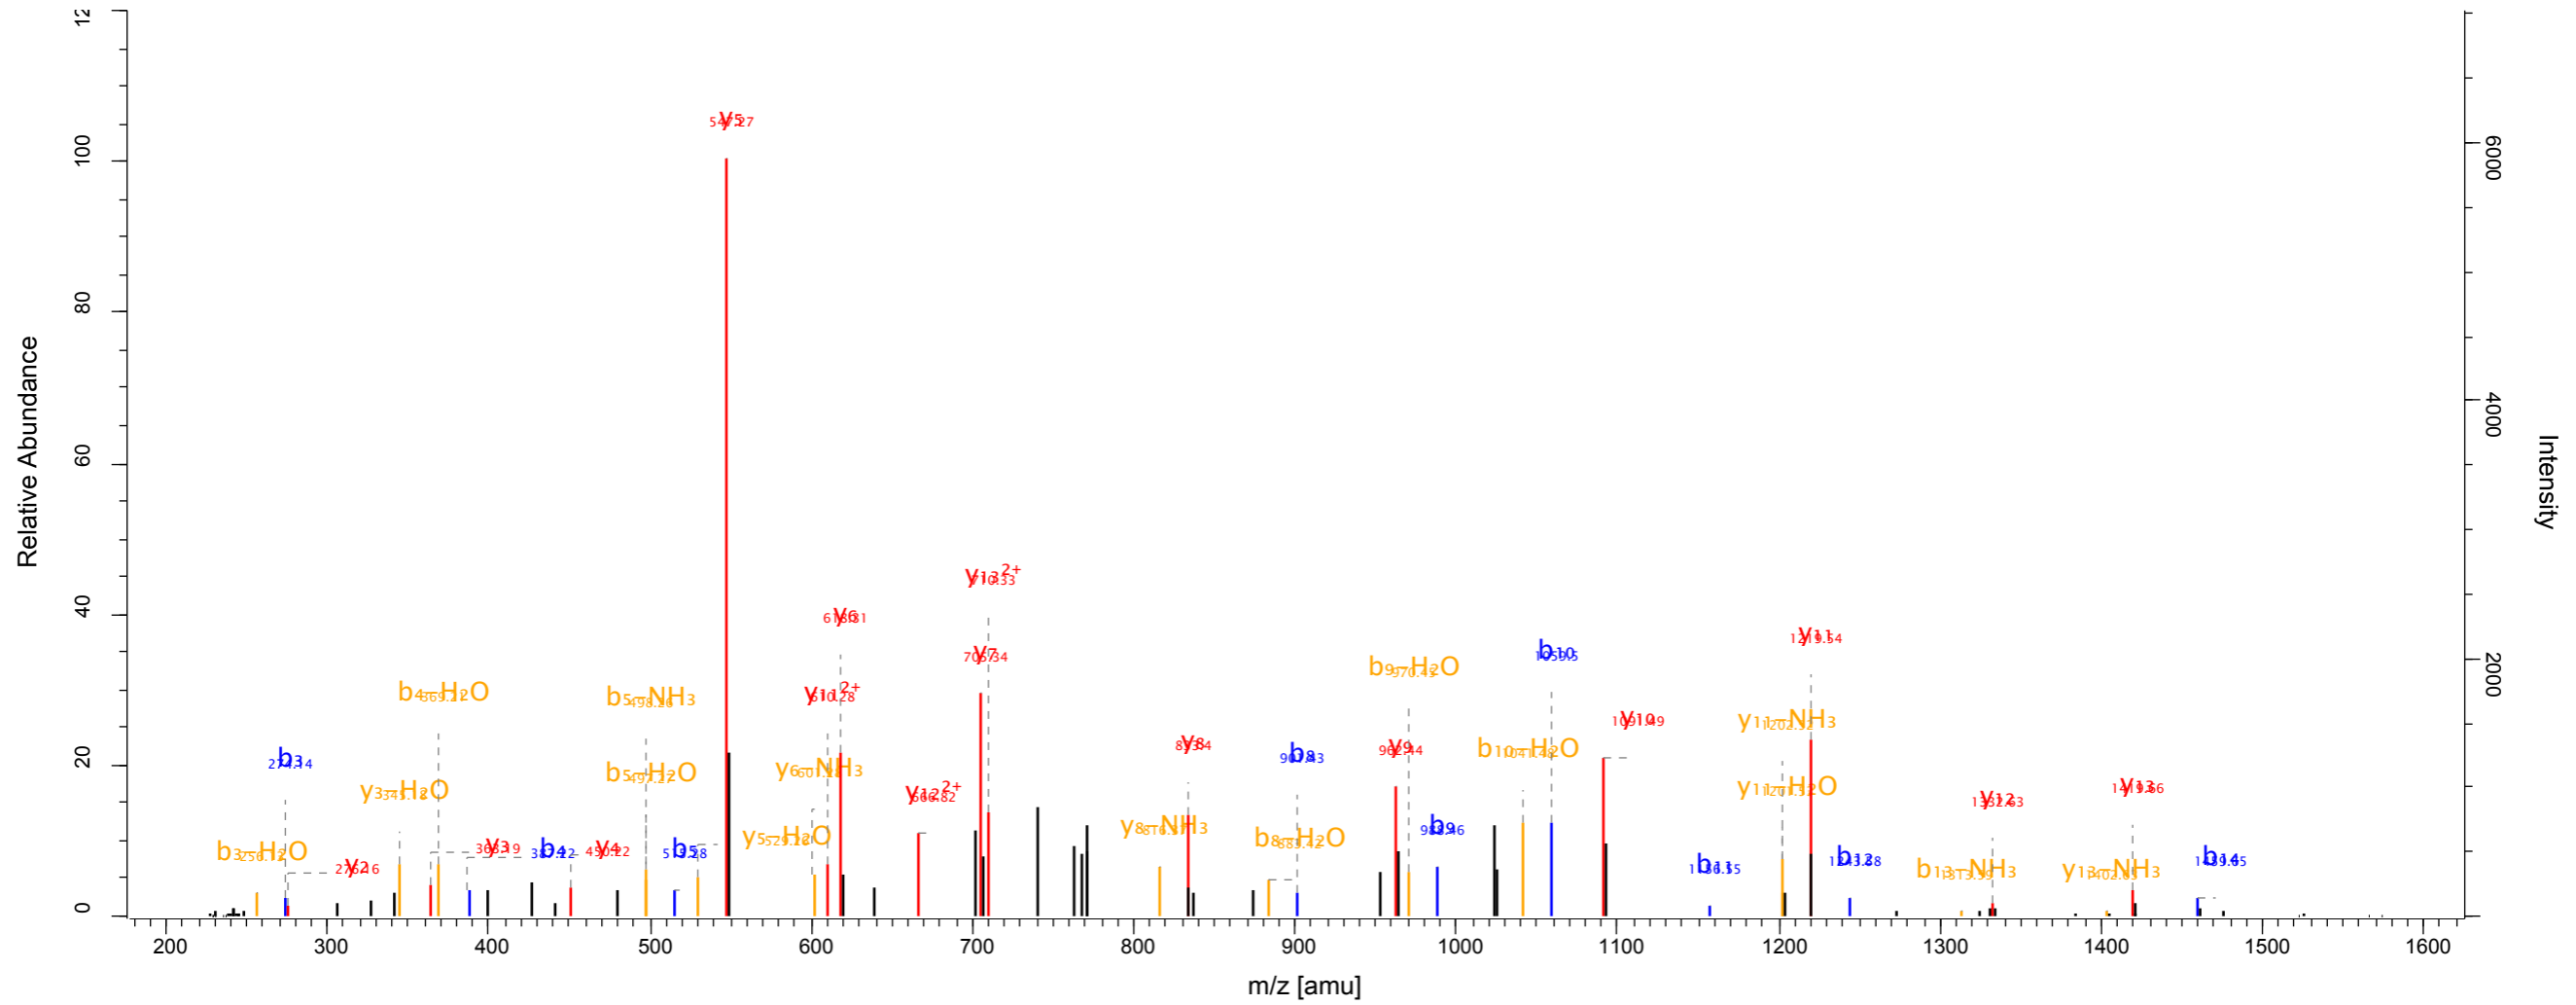

Scan number 7781 Raw file SKaraca\_LMB\_TCE\_Forward\_10\_191011\_rep2  
 Method ITMS; CID Pepti... 125.28

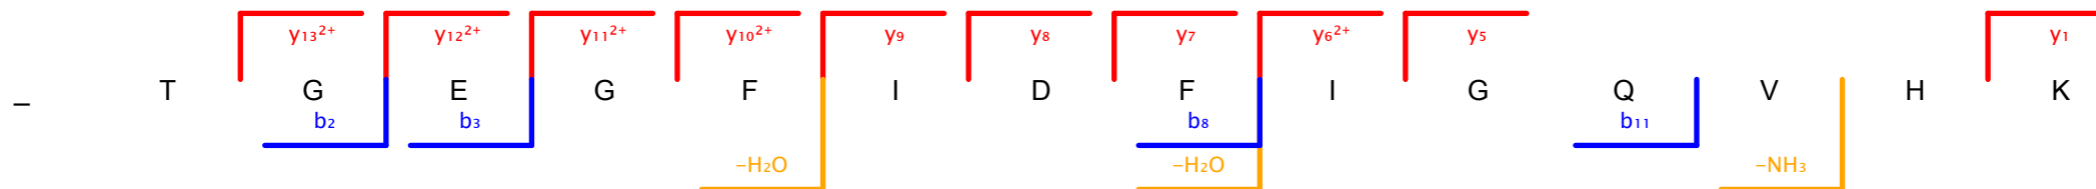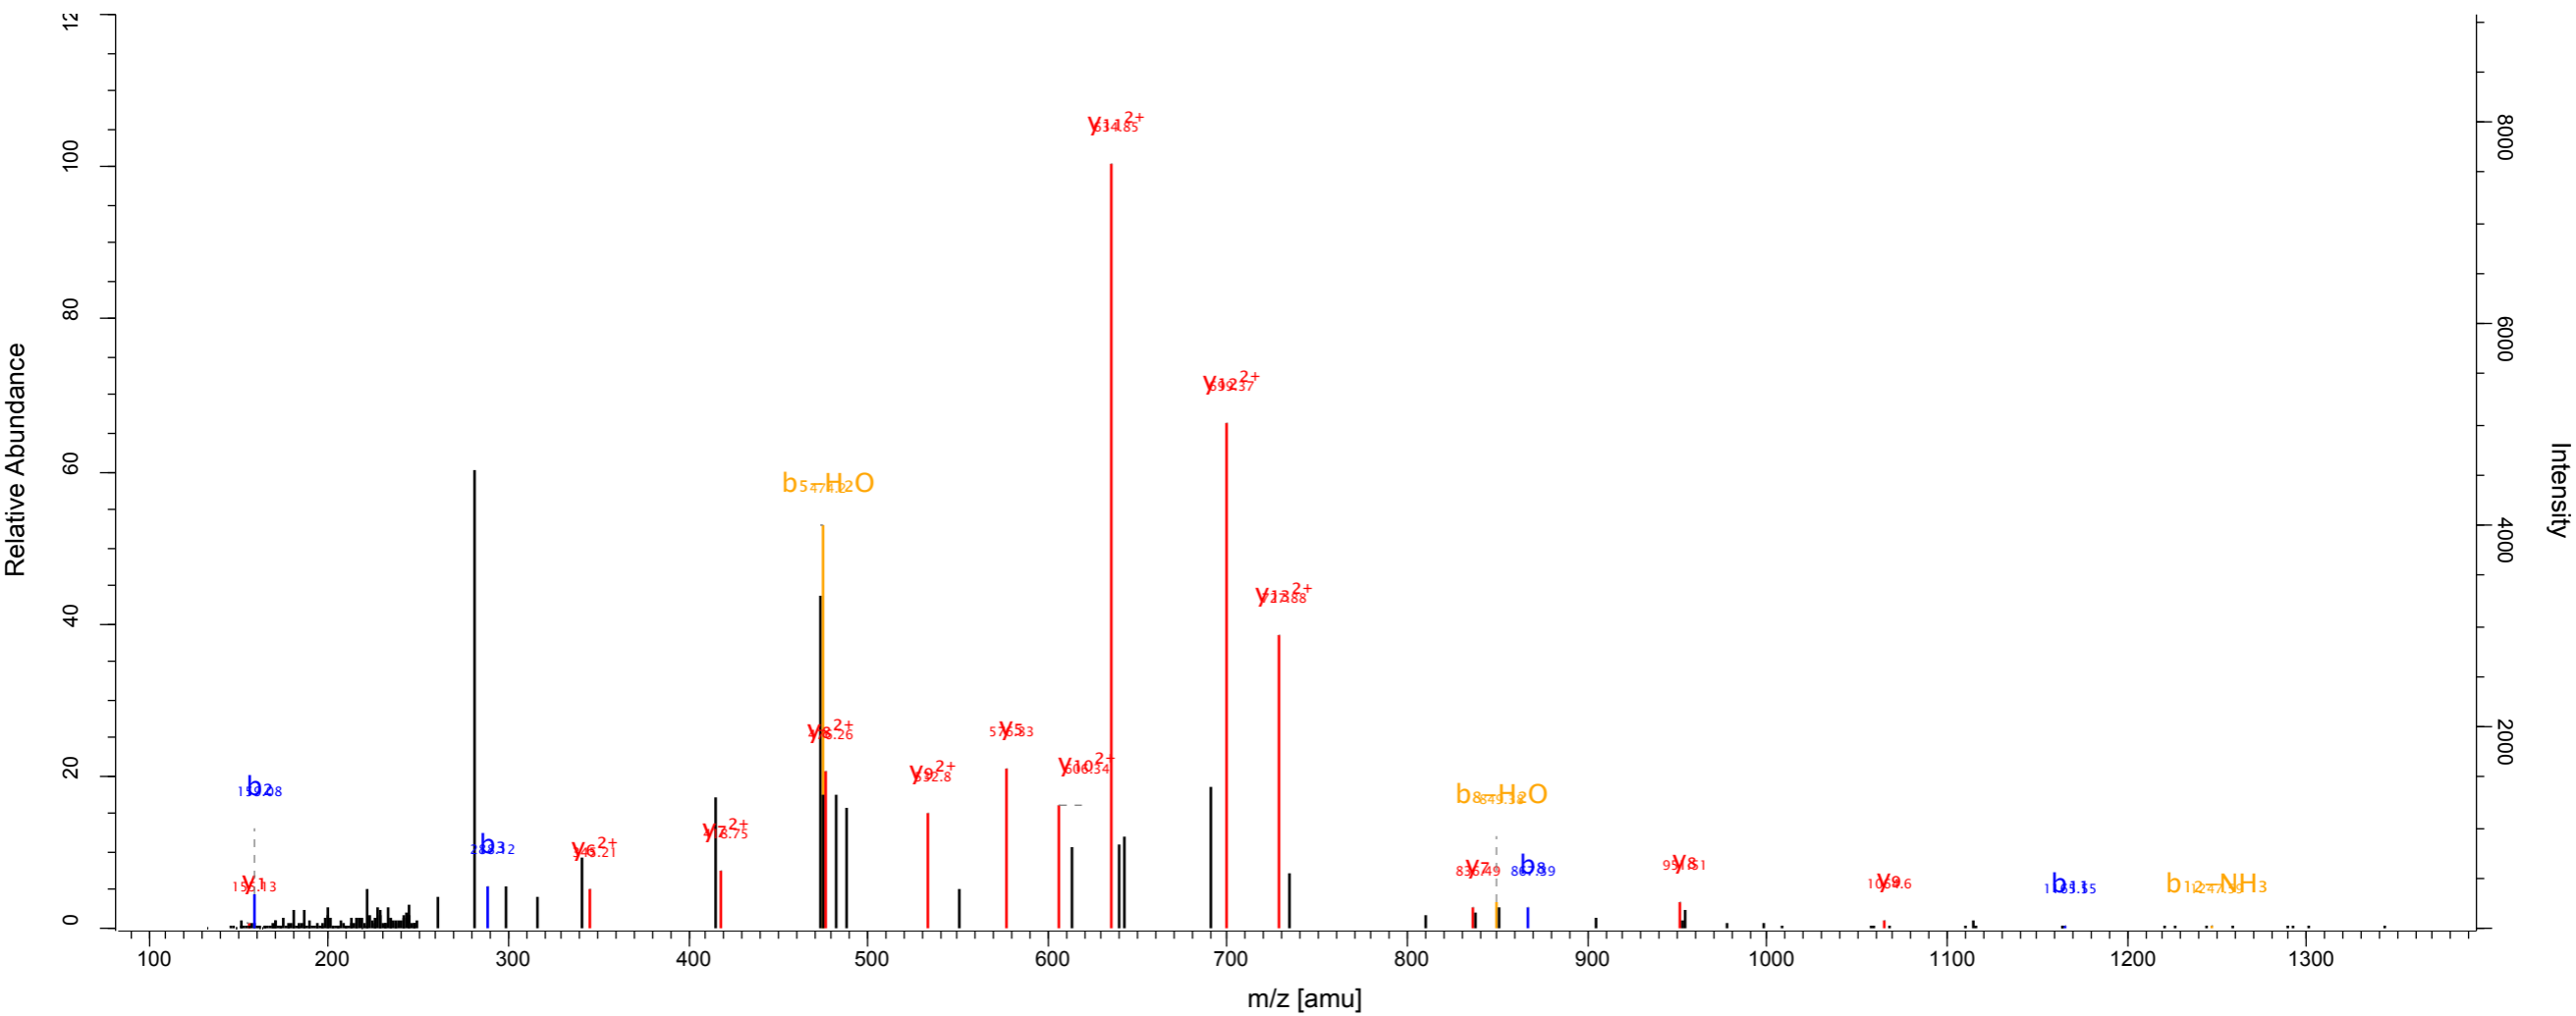



|             |           |          |                                        |
|-------------|-----------|----------|----------------------------------------|
| Scan number | 2460      | Raw file | SKaraca_LMB_TCE_Forward_10_191011_rep3 |
| Method      | ITMS; CID | Pepti... | 131.82                                 |

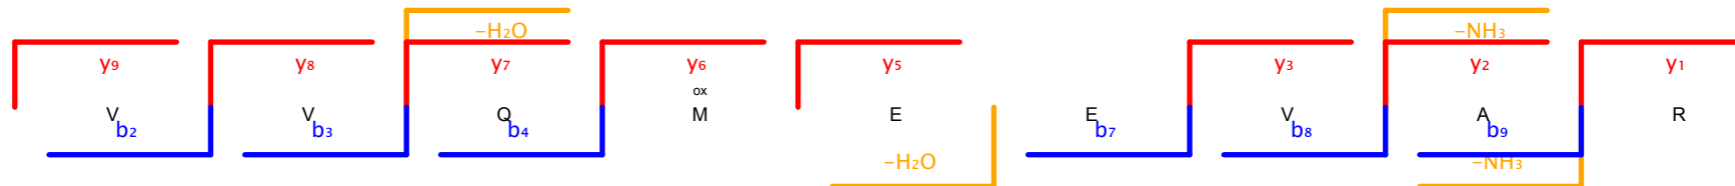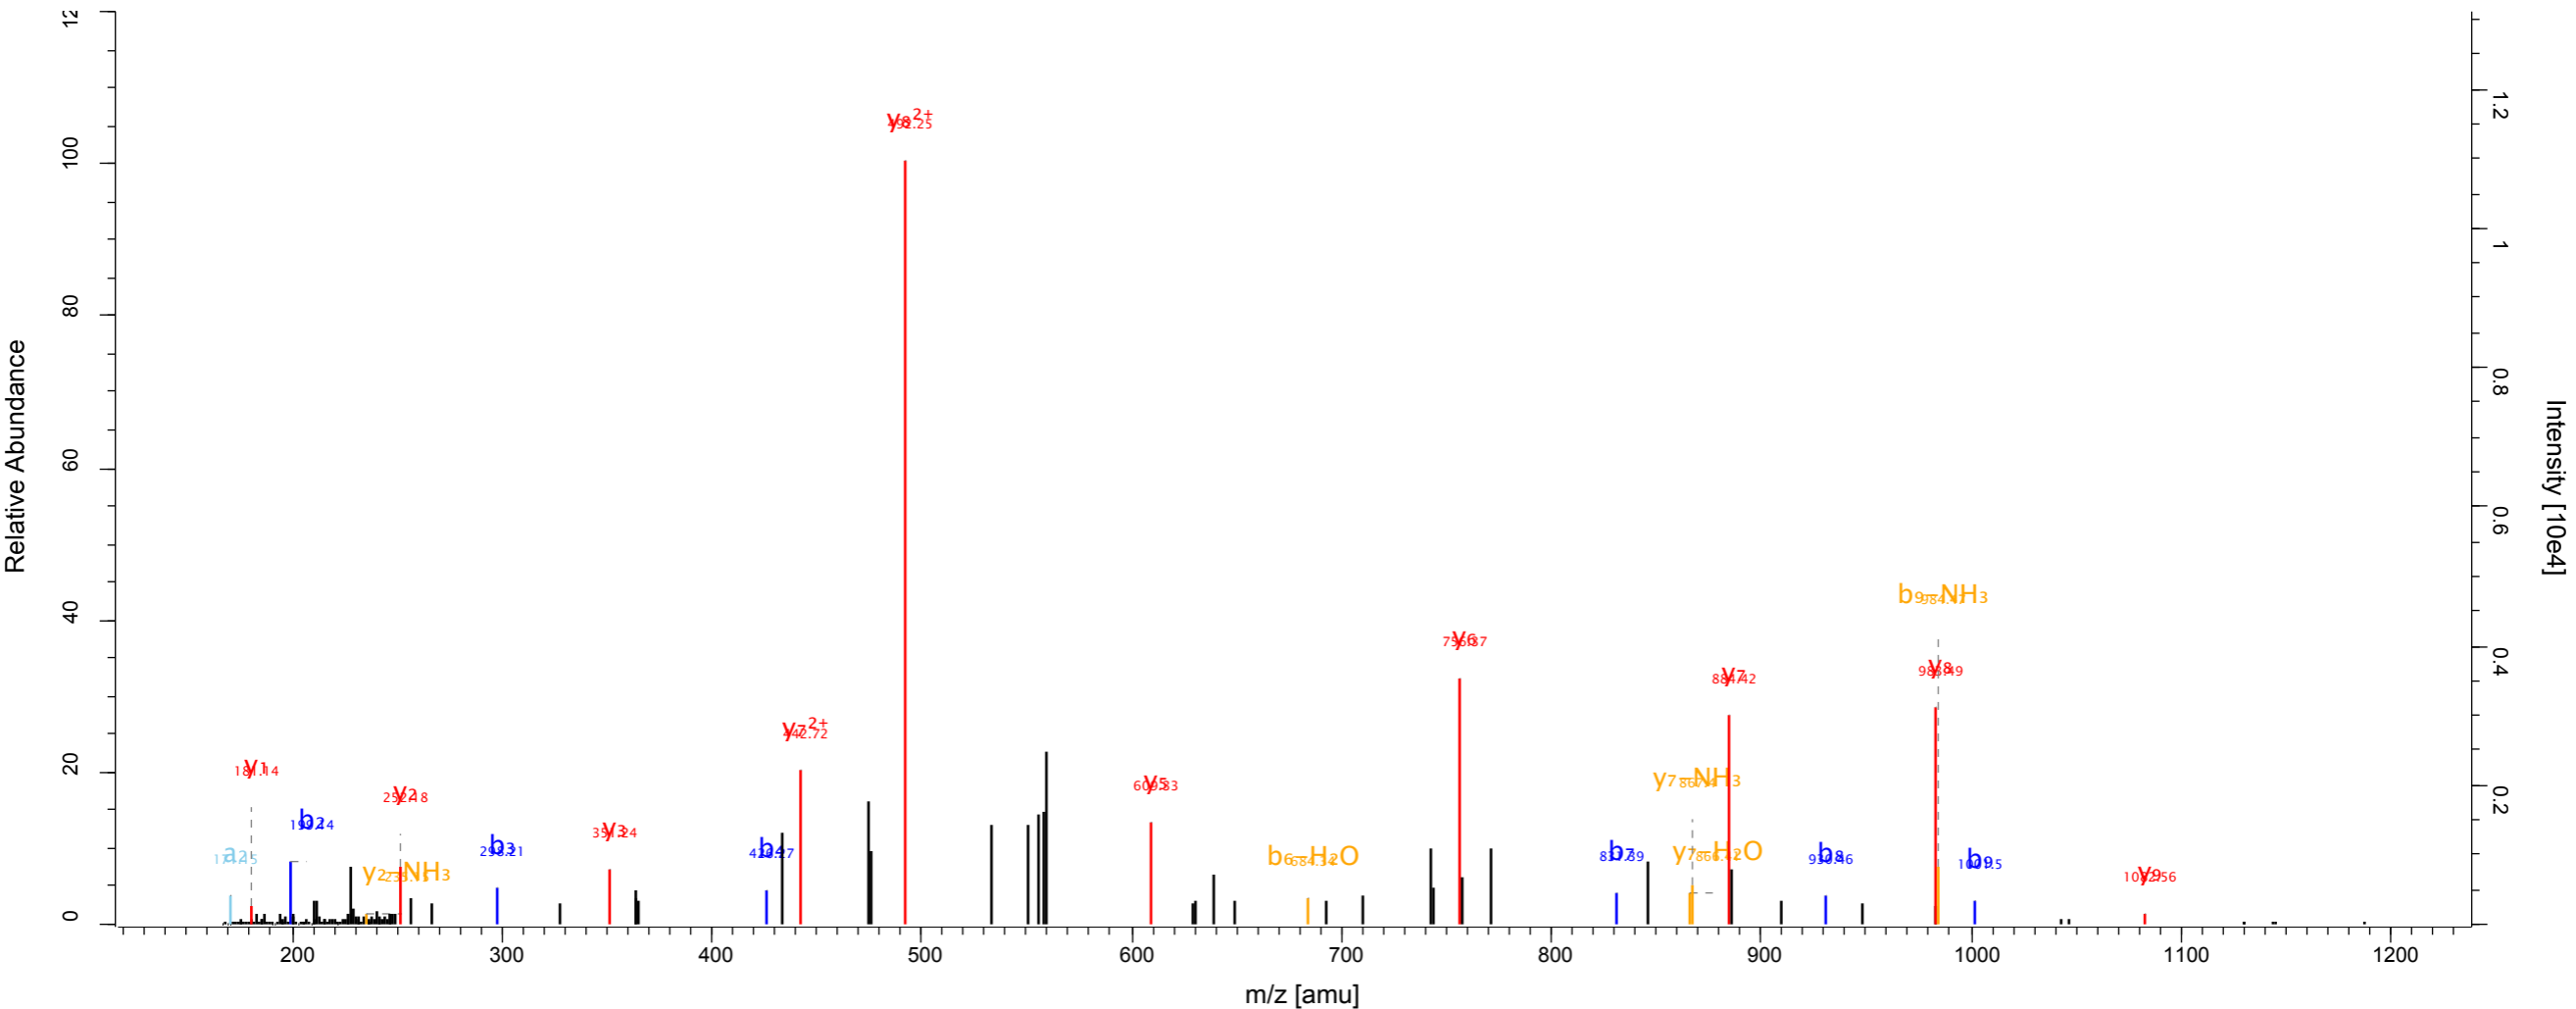

Scan number 3238 Raw file SKaraca\_LMB\_TCE\_Forward\_10\_191011\_rep3  
 Method ITMS; CID Pepti... 93.24

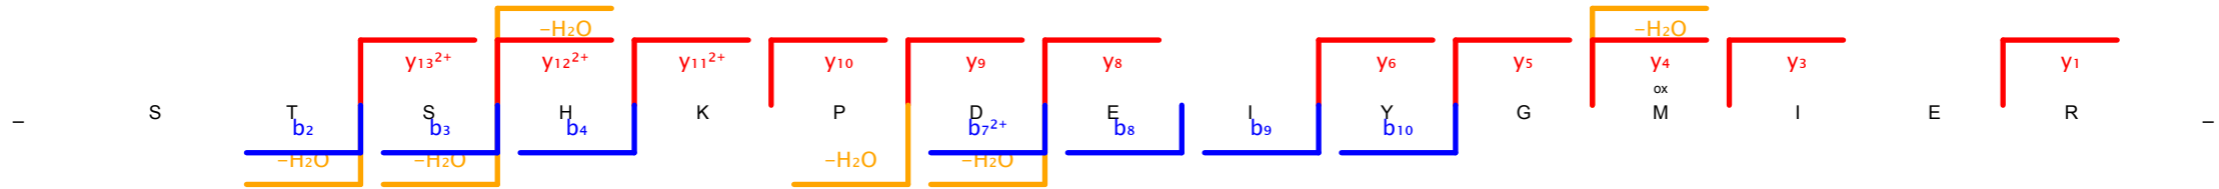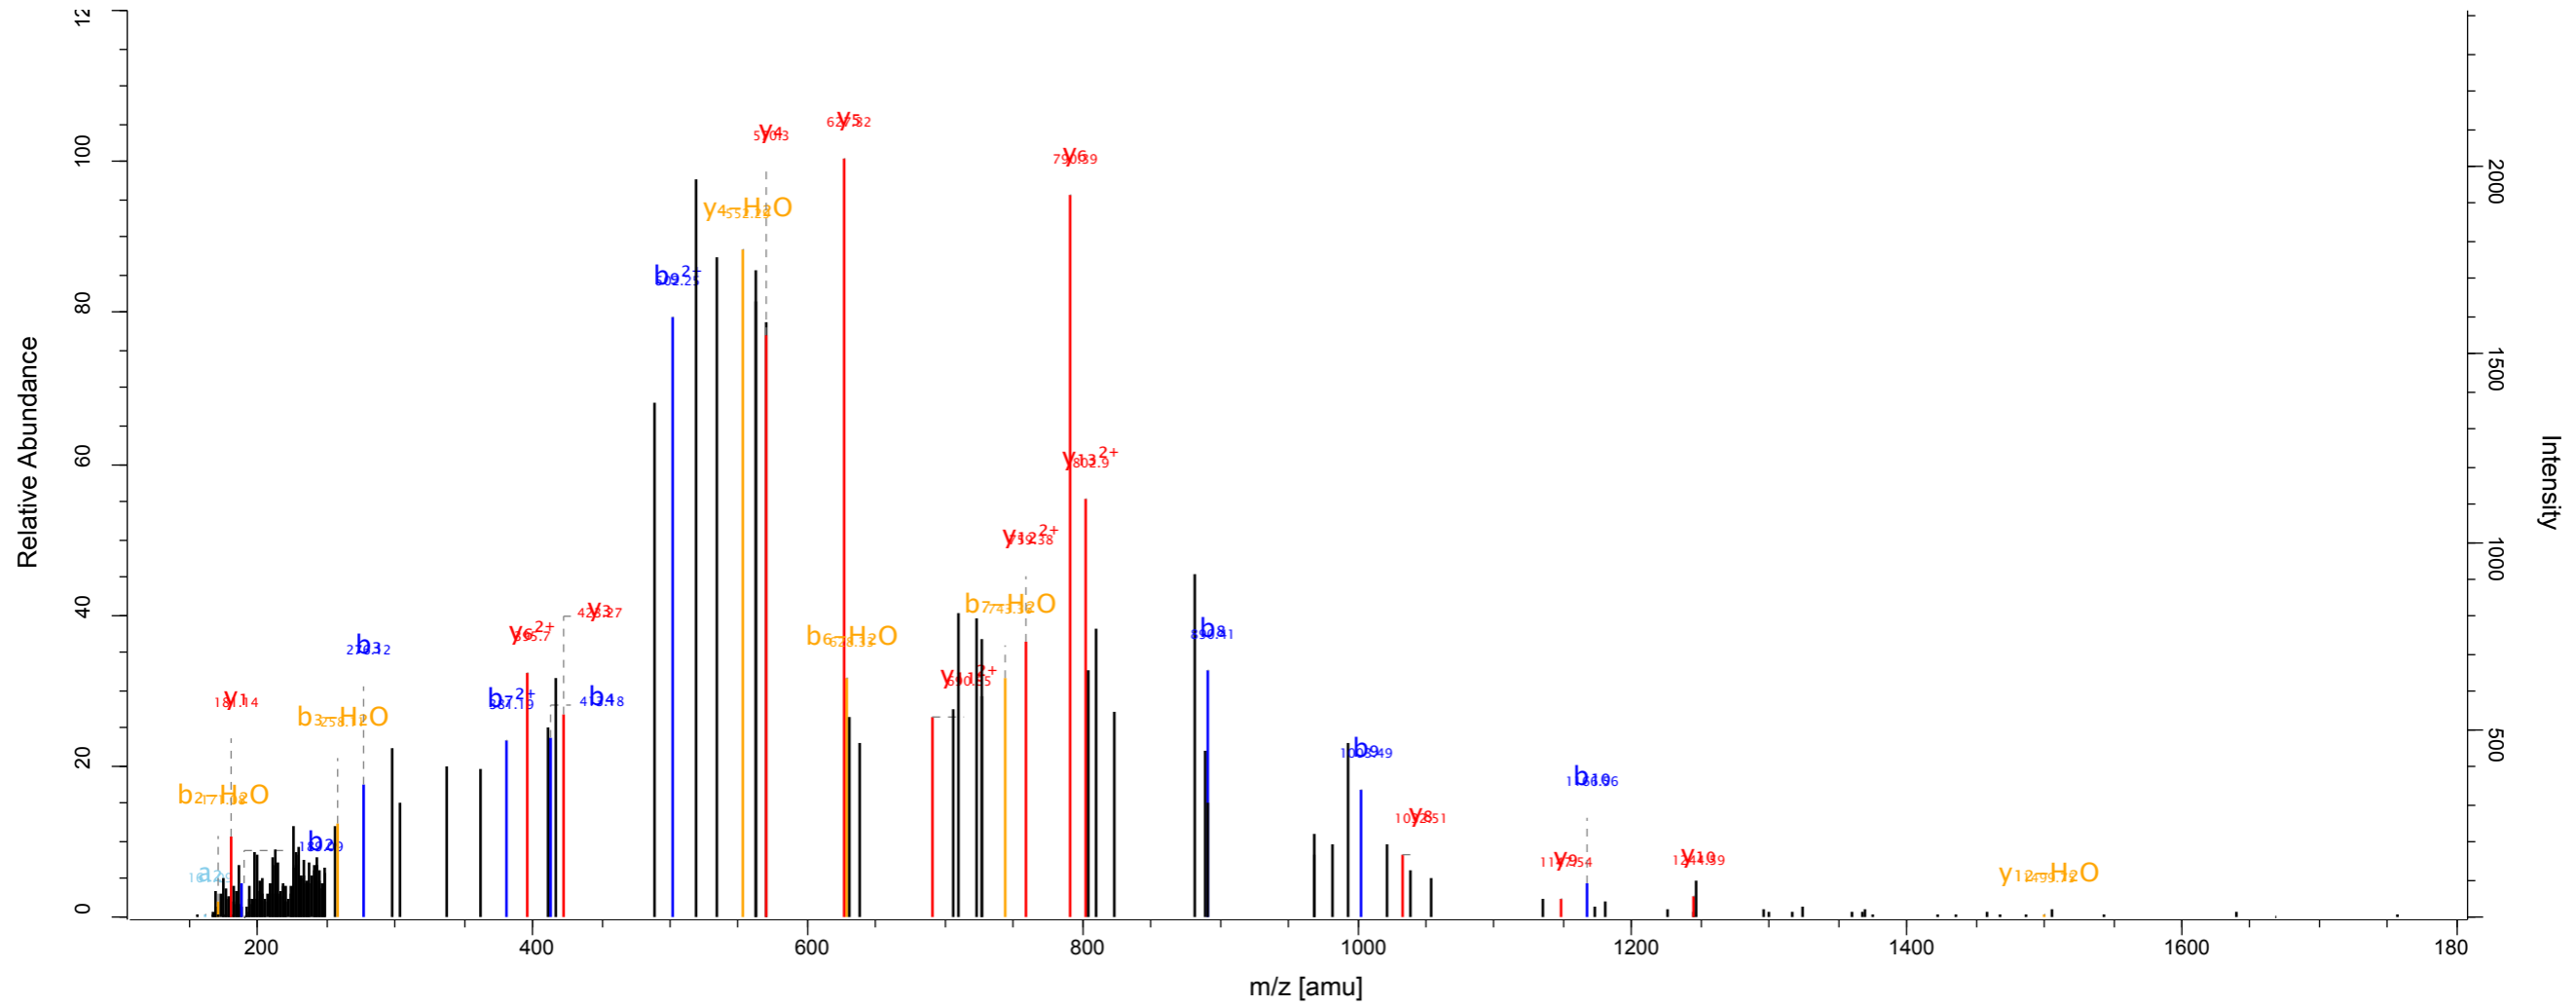

Scan number 7469 Raw file SKaraca\_LMB\_TCE\_Forward\_11\_191011\_rep1  
 Method ITMS; CID Pepti... 148.56

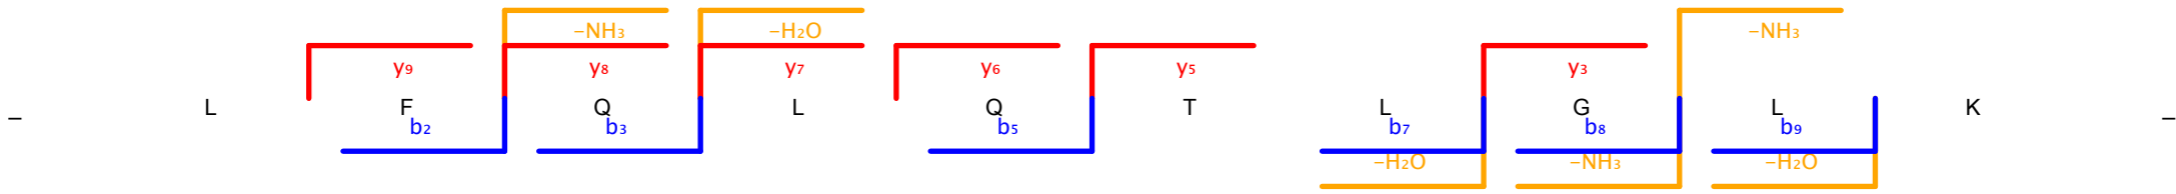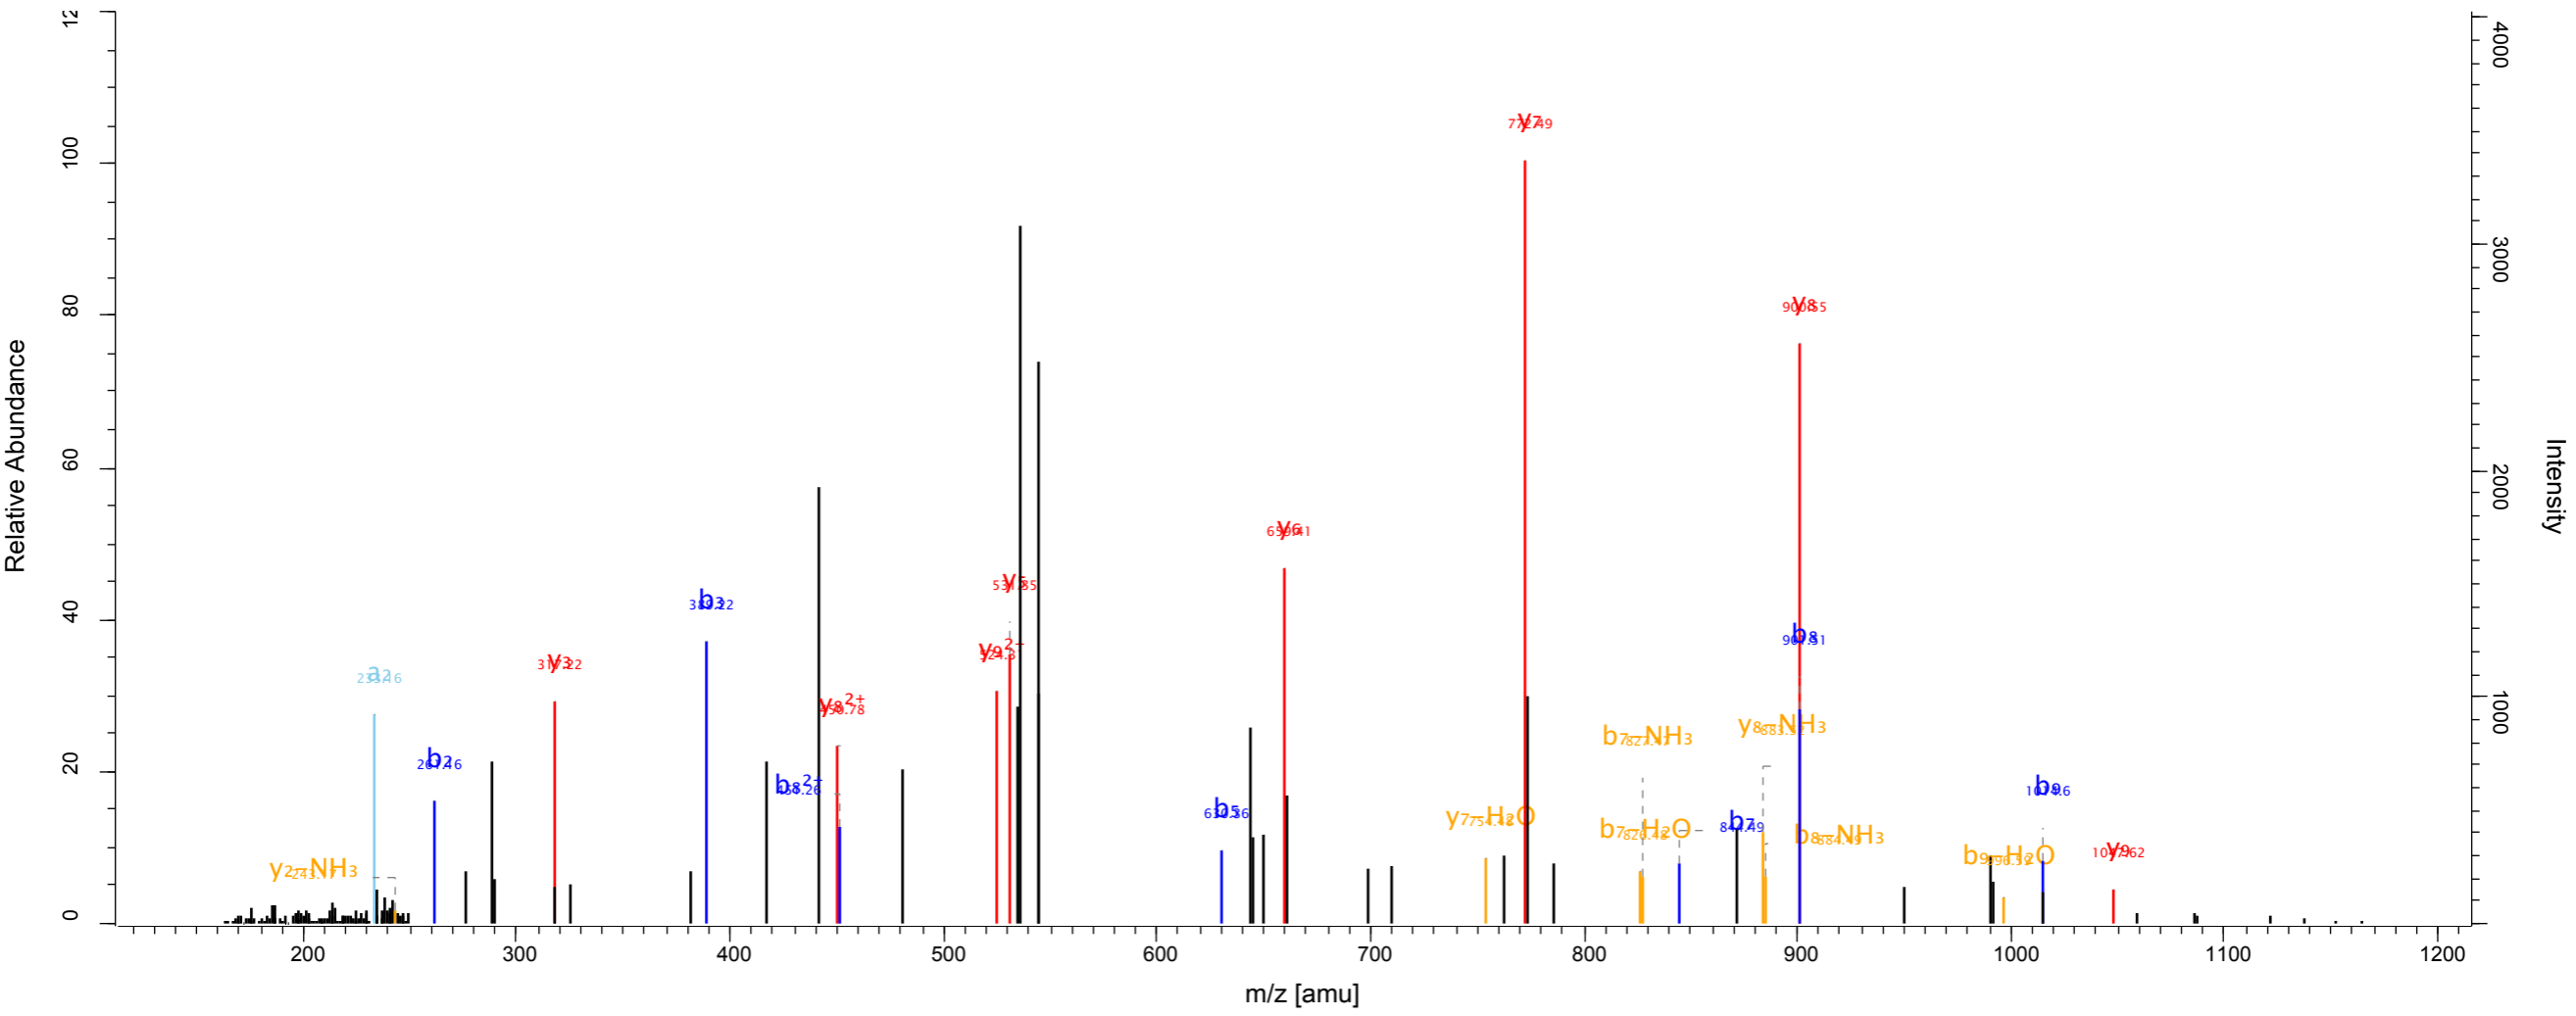

|             |           |          |                                        |
|-------------|-----------|----------|----------------------------------------|
| Scan number | 8264      | Raw file | SKaraca_LMB_TCE_Forward_11_191011_rep1 |
| Method      | ITMS; CID | Pepti... | 148.52                                 |

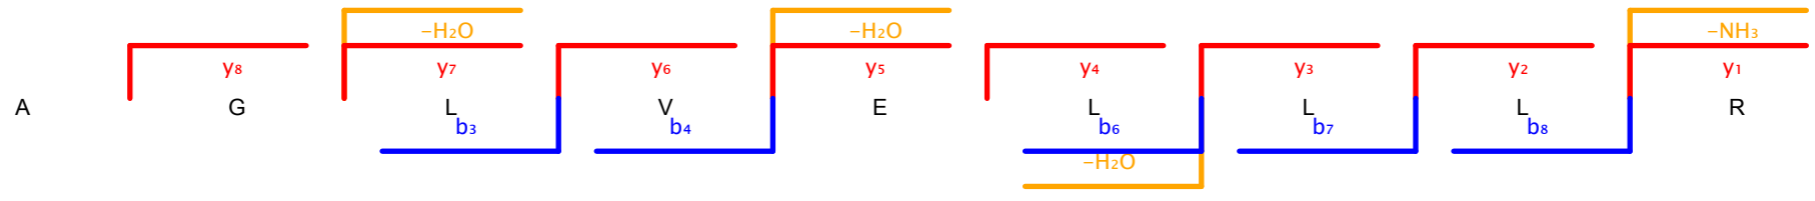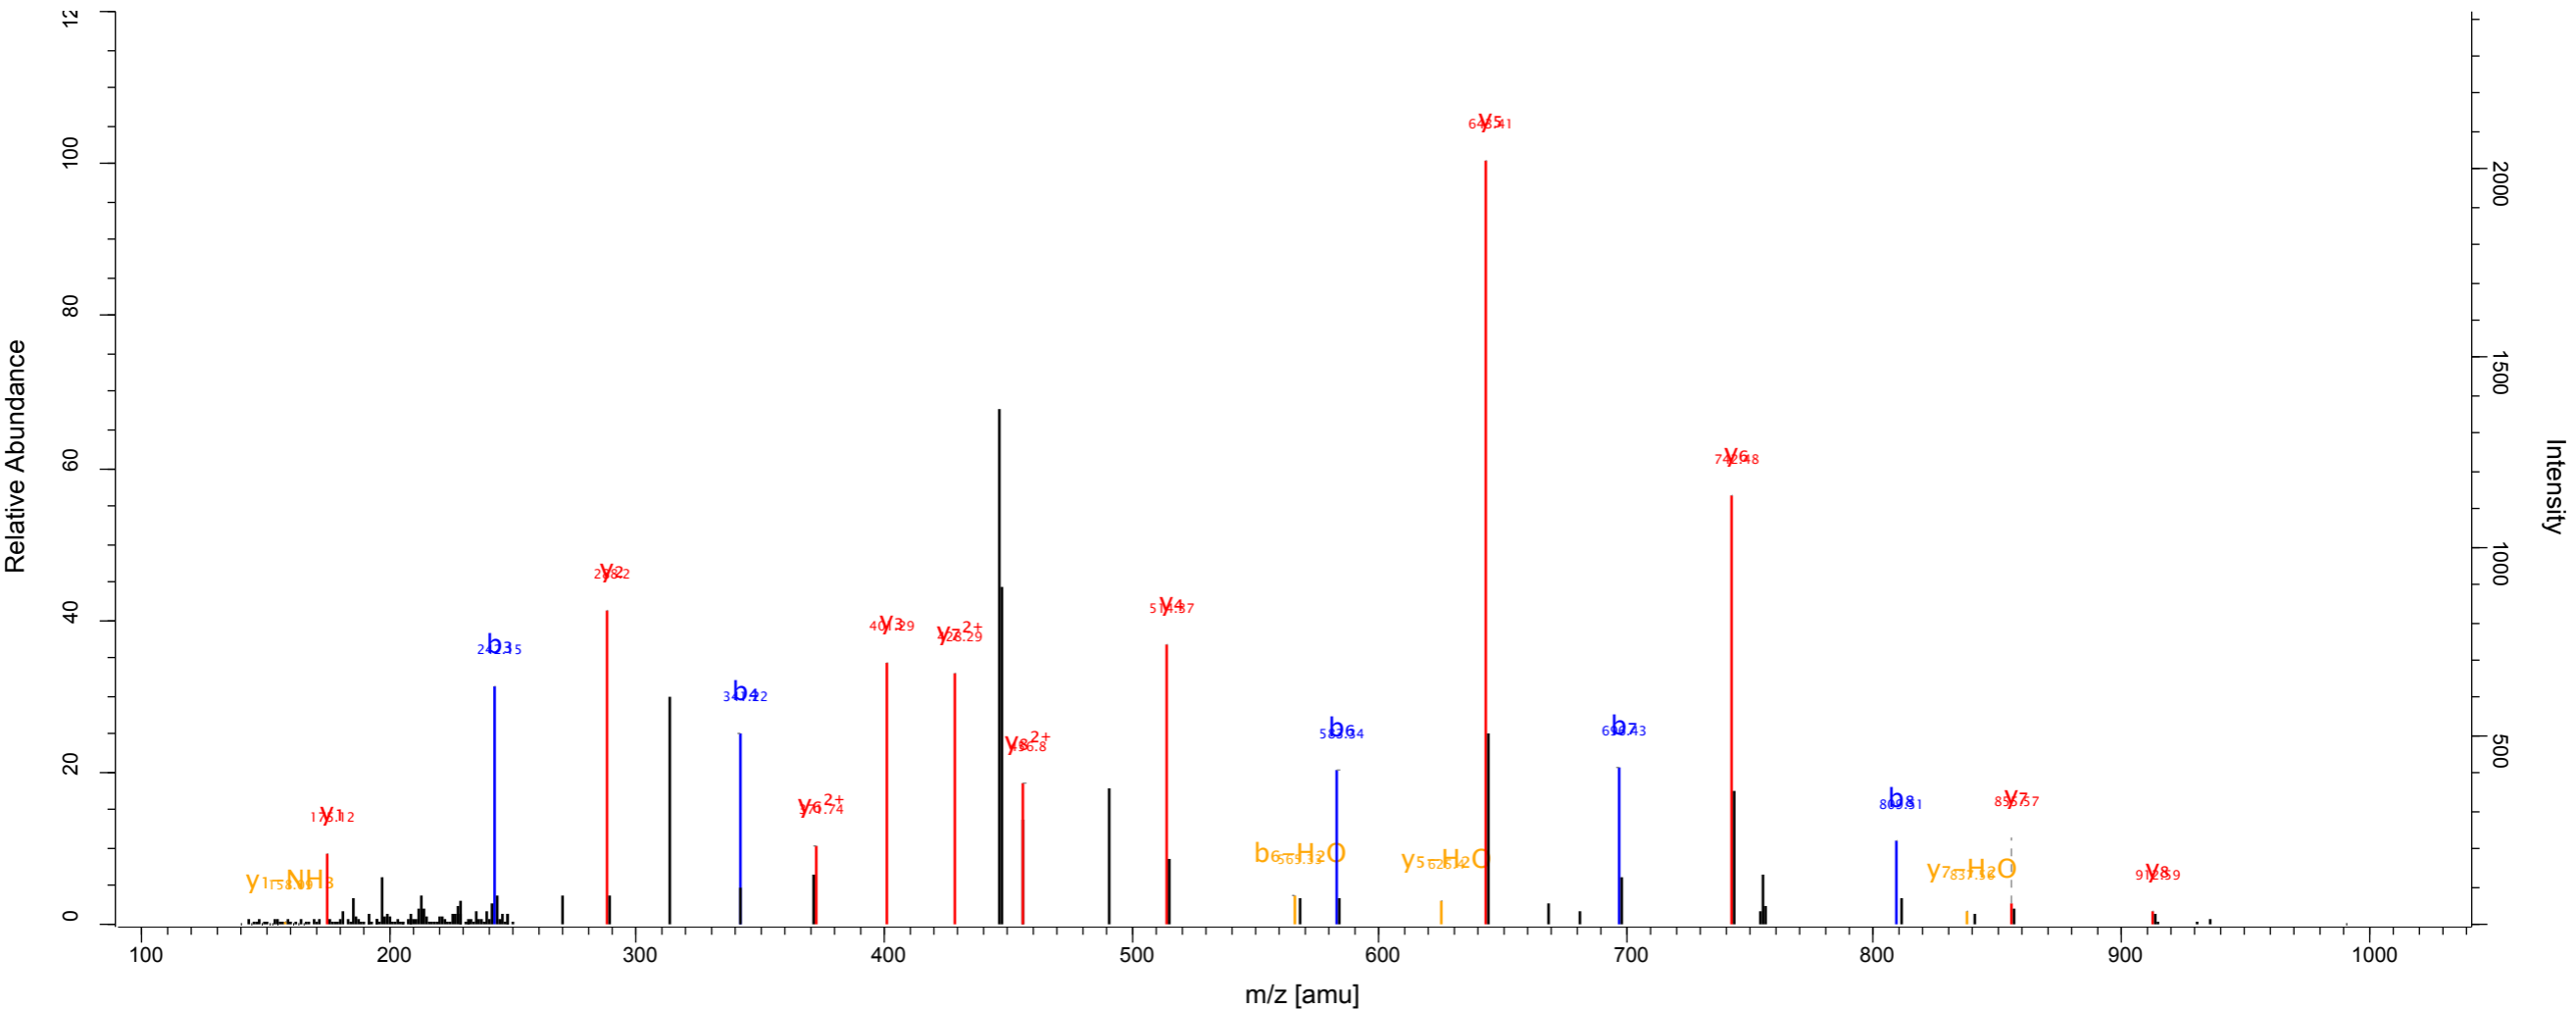

|             |           |          |                                        |
|-------------|-----------|----------|----------------------------------------|
| Scan number | 8732      | Raw file | SKaraca_LMB_TCE_Forward_11_191011_rep1 |
| Method      | ITMS; CID | Pepti... | 125.23                                 |

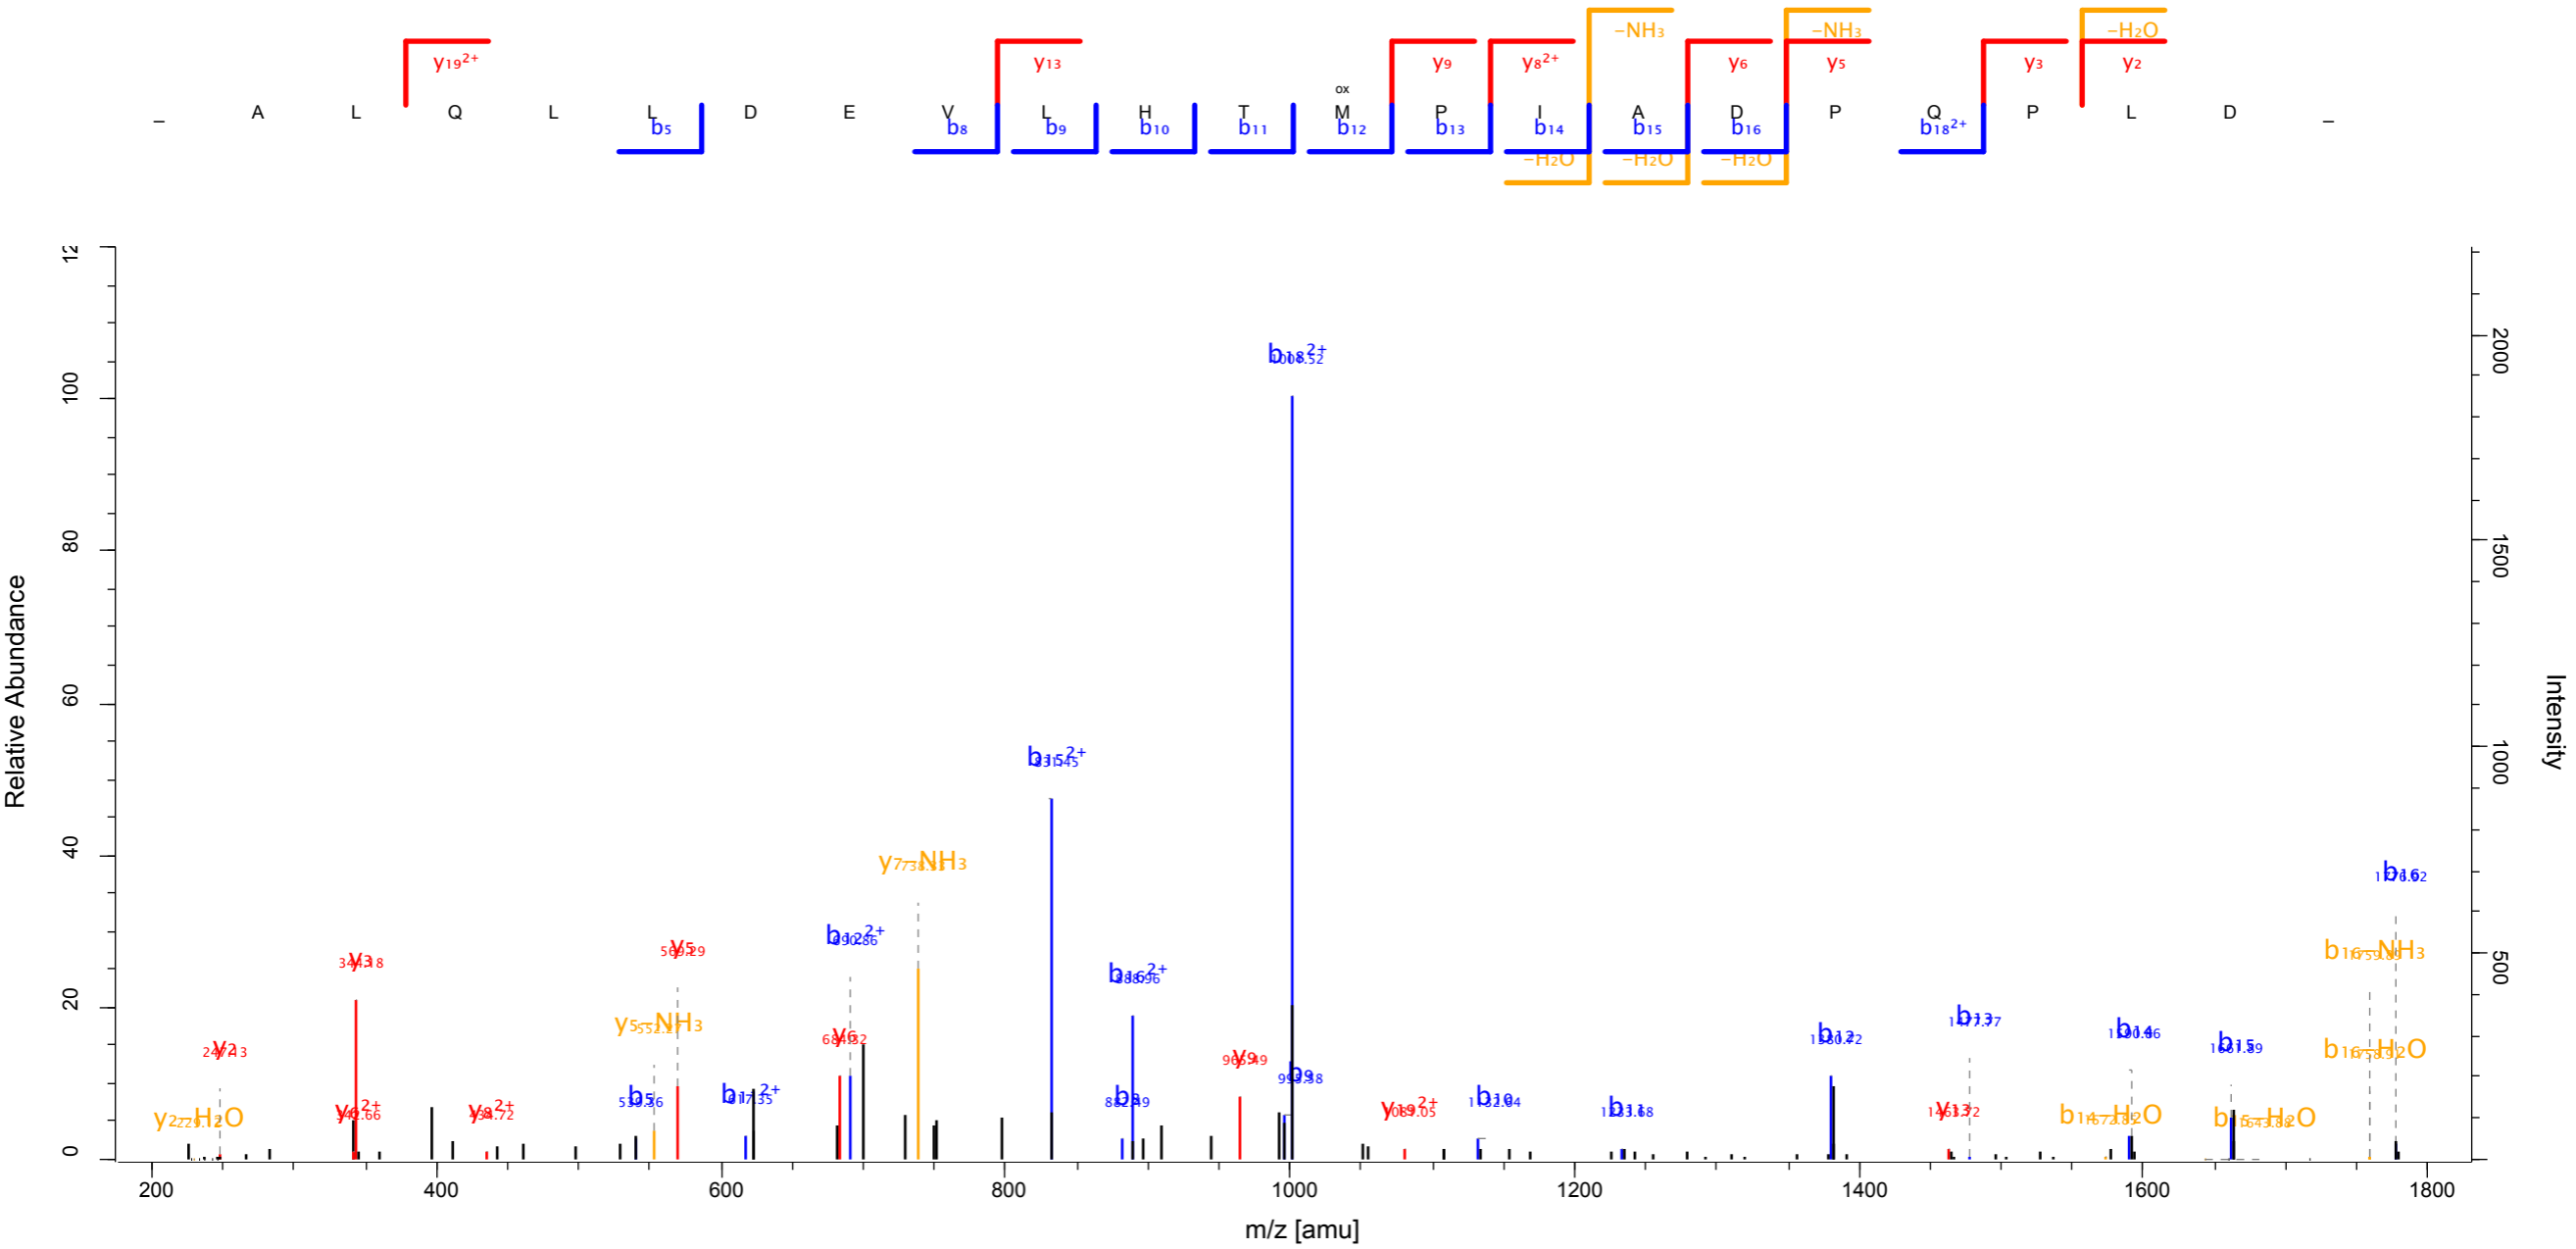

Scan number 8920  
Method ITMS; CID

Raw file SKaraca\_LMB\_TCE\_Forward\_11\_191011\_rep1  
Pepti... 118.87

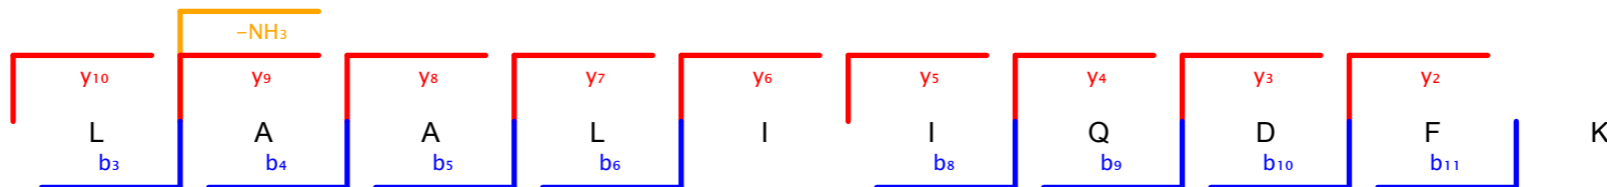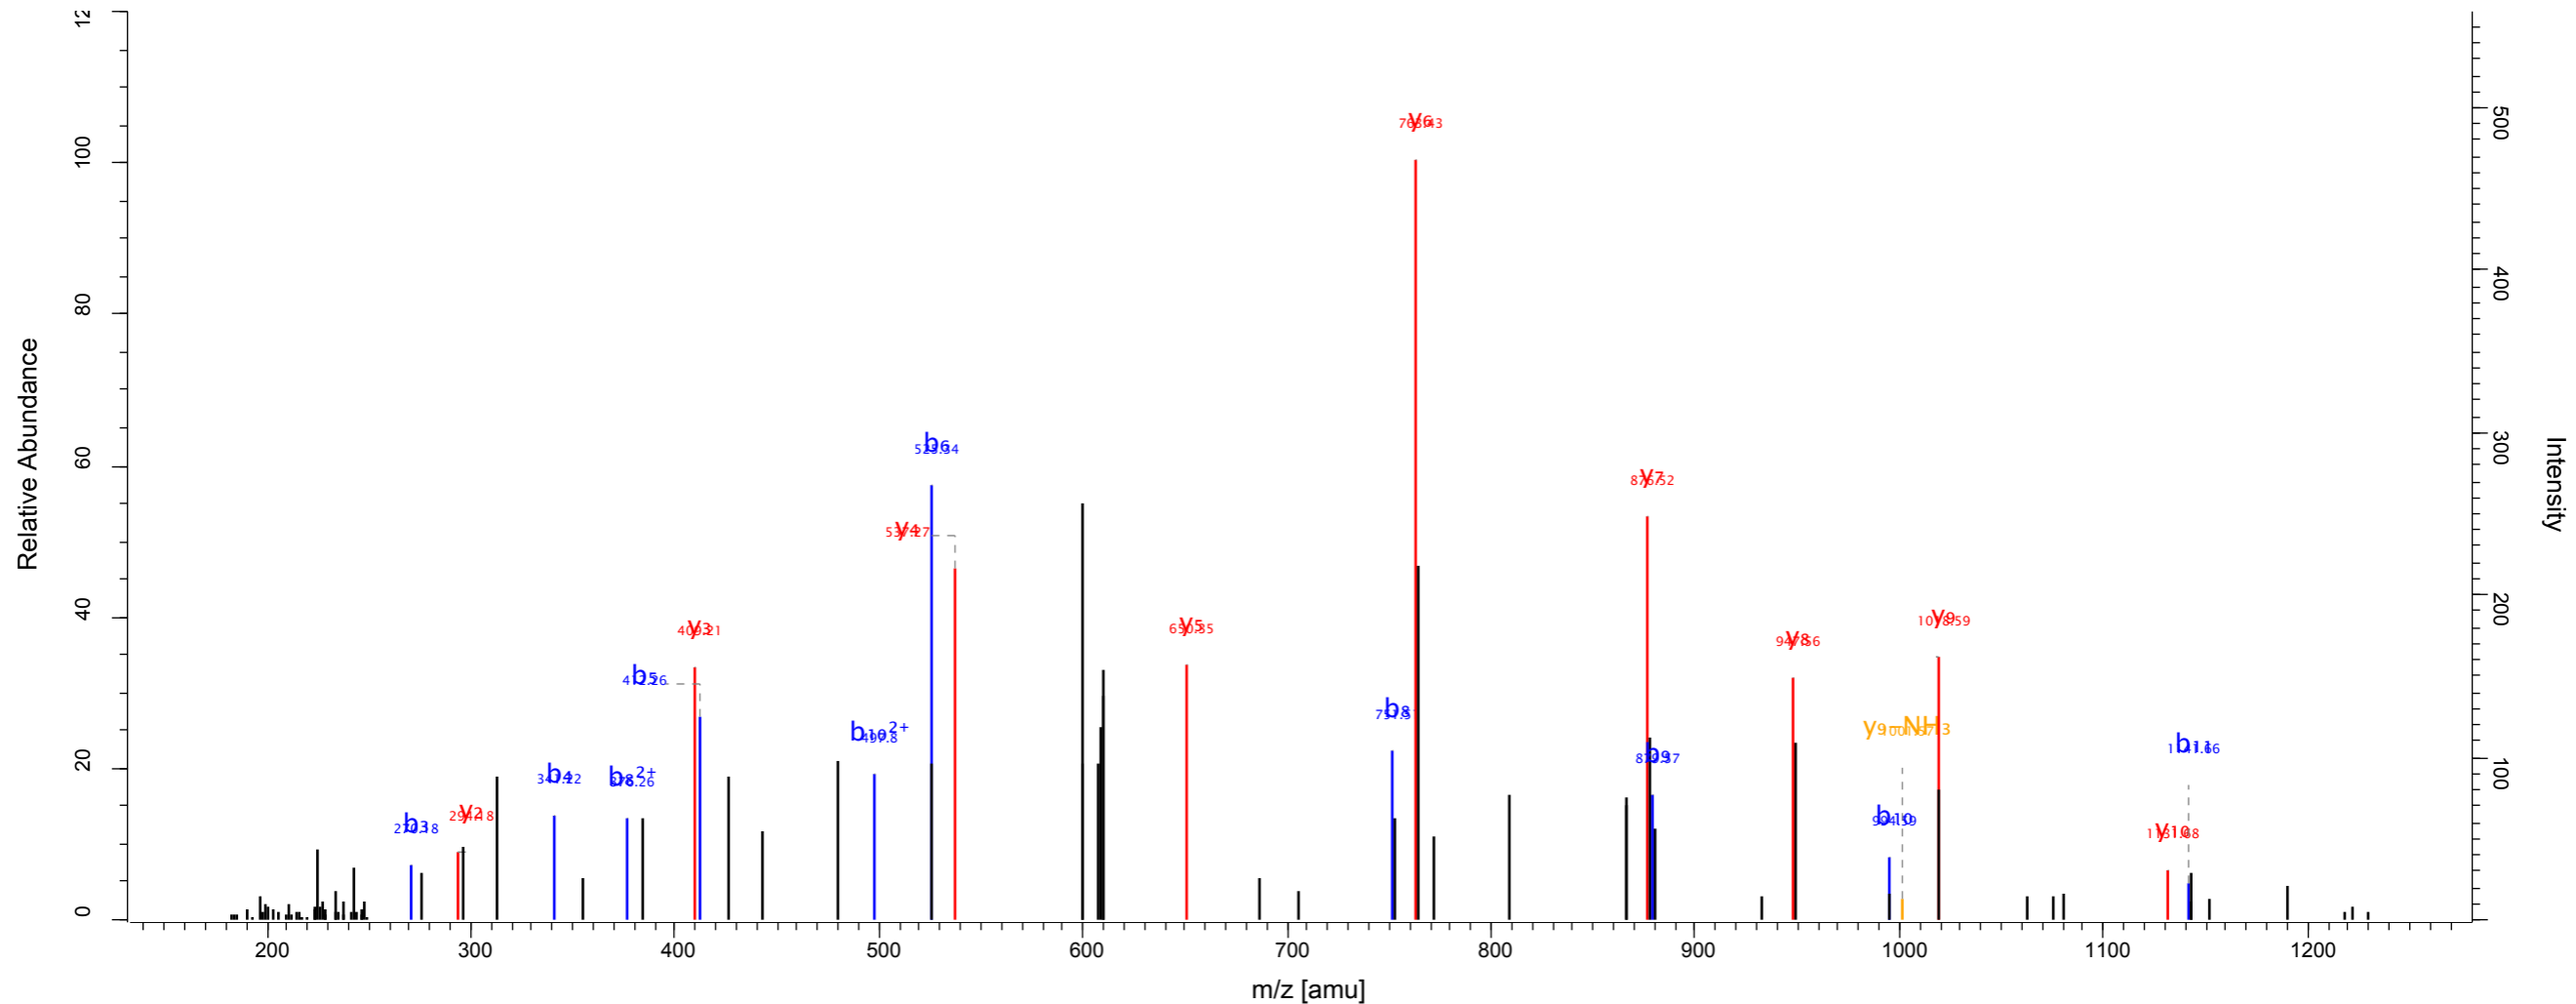

Scan number 3465 Raw file SKaraca\_LMB\_TCE\_Forward\_12\_191011\_rep1  
 Method ITMS; CID Pepti... 125.97

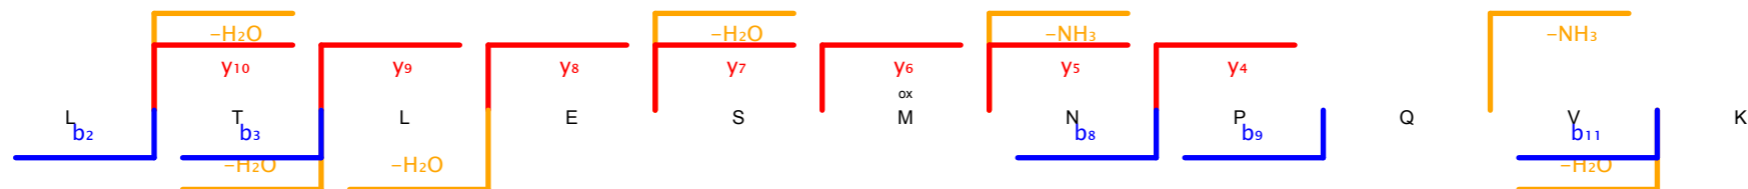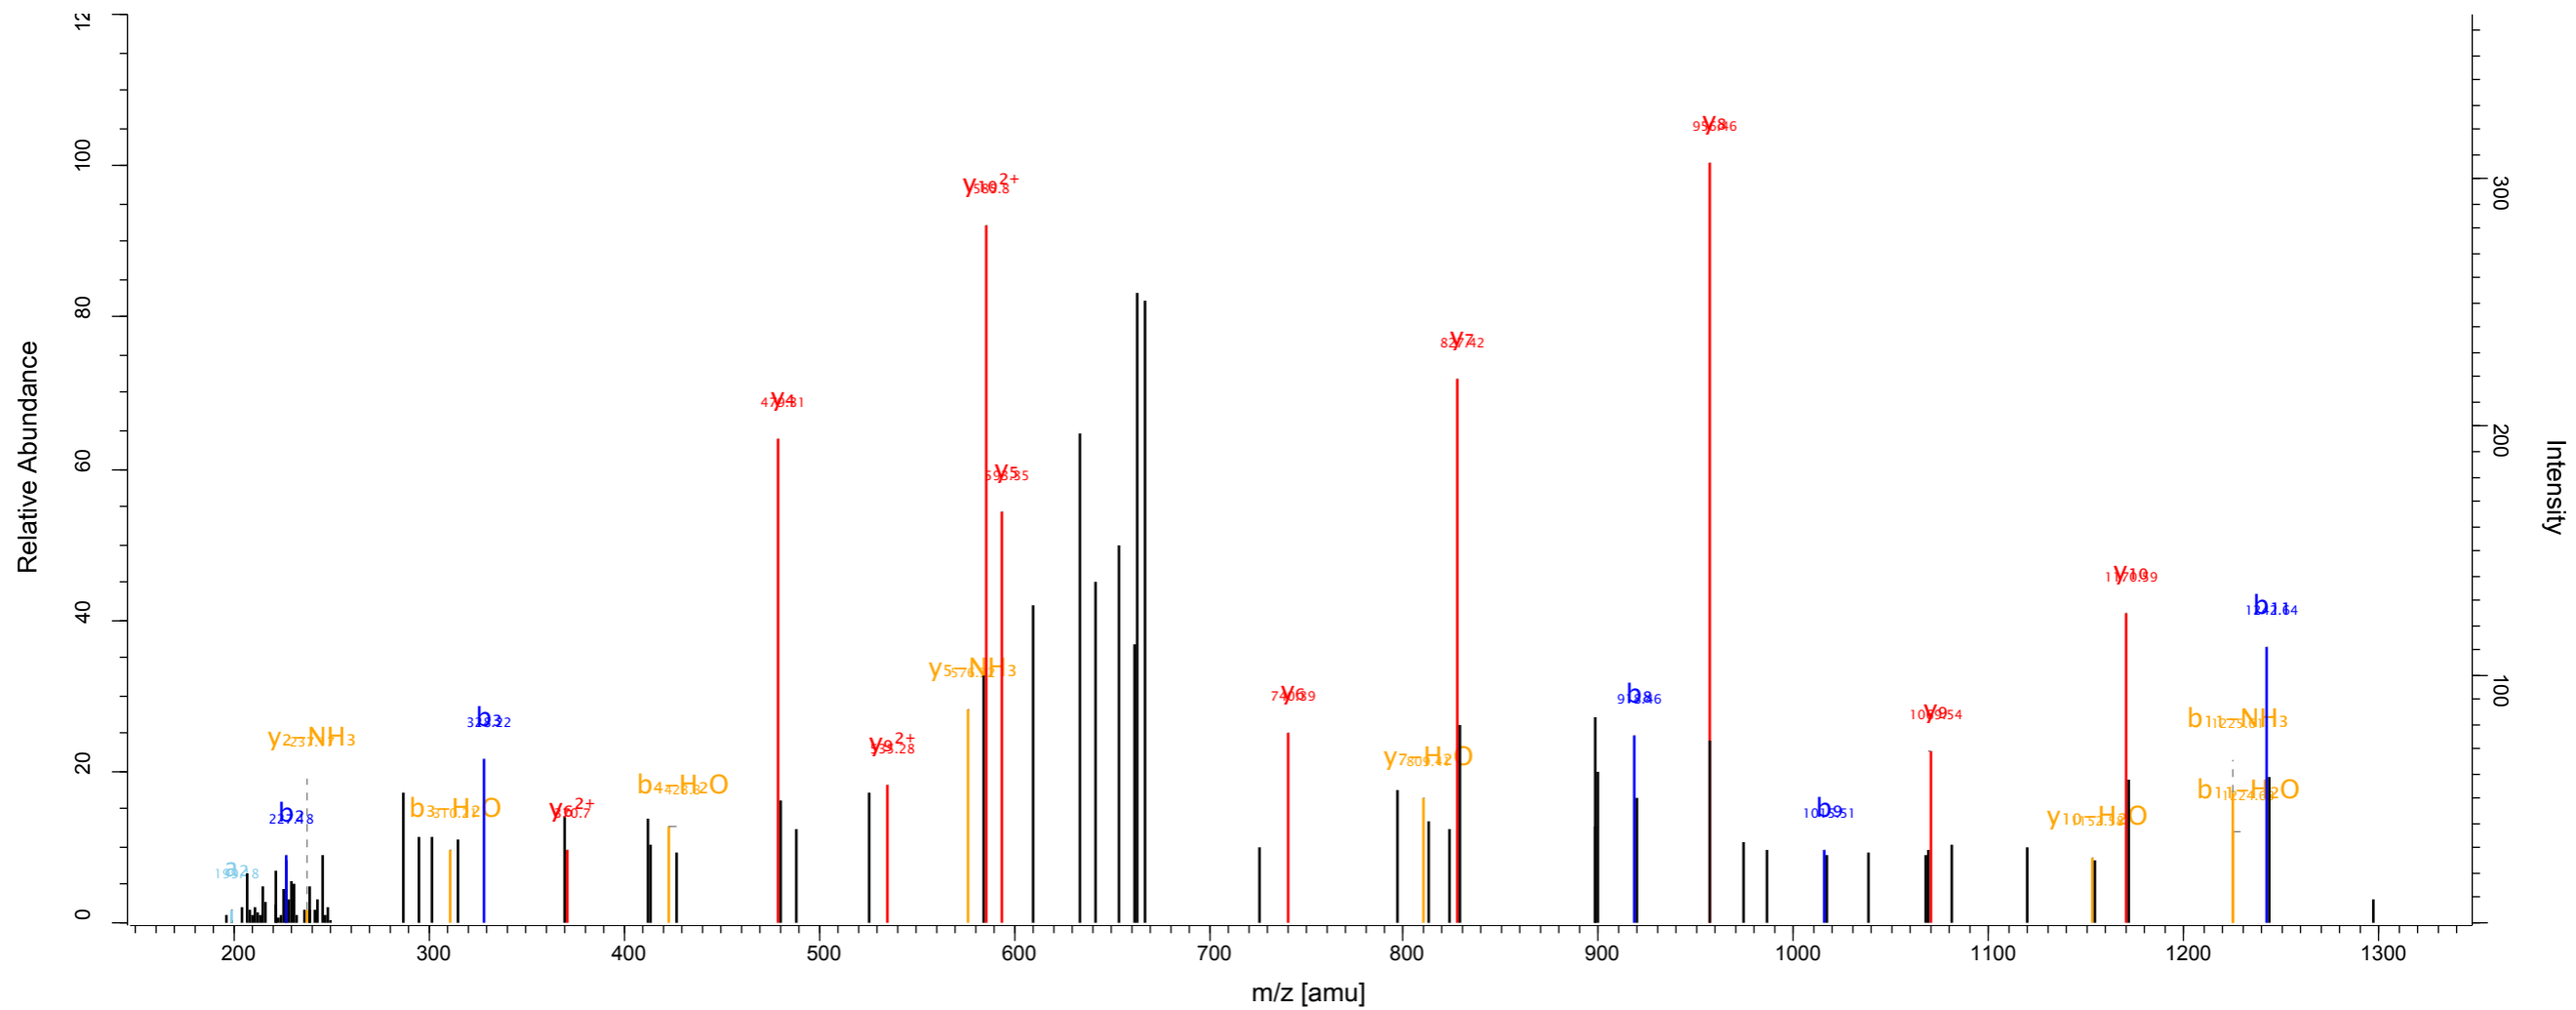

Scan number 10064 Raw file SKaraca\_LMB\_TCE\_Forward\_12\_191011\_rep2  
 Method ITMS; CID Pepti... 170.95

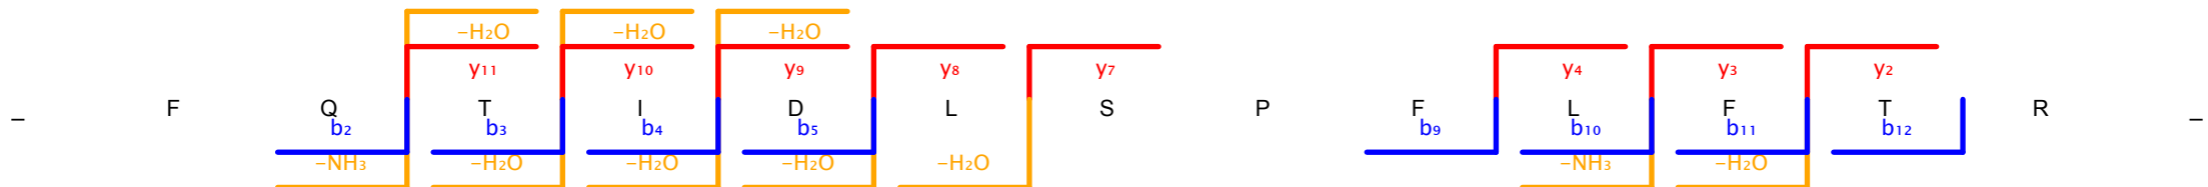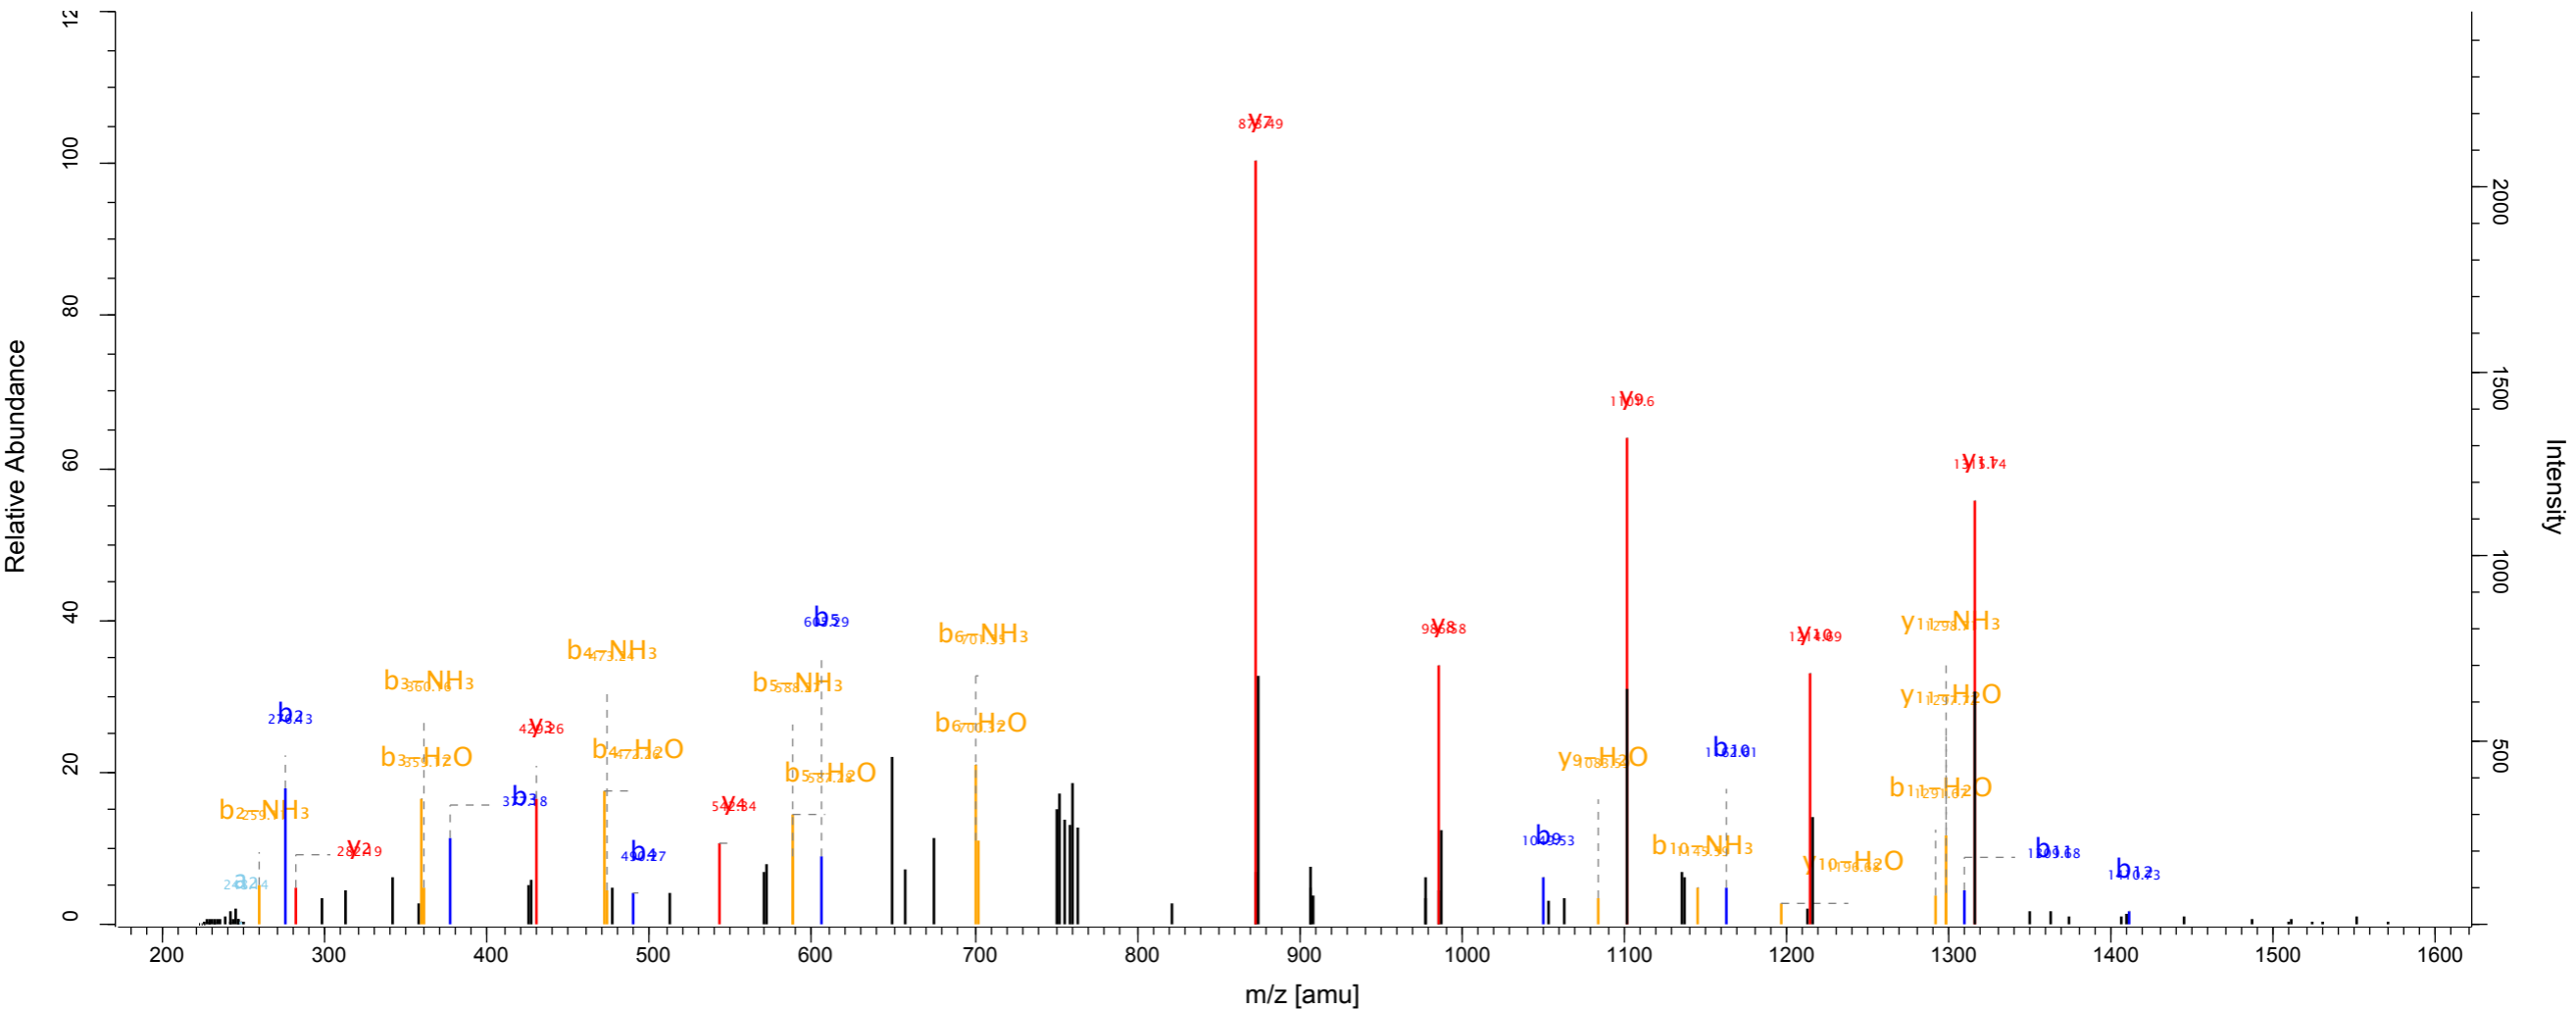



Scan number 2754 Raw file SKaraca\_LMB\_TCE\_Forward\_12\_191011\_rep2  
 Method ITMS; CID Pepti... 239.87

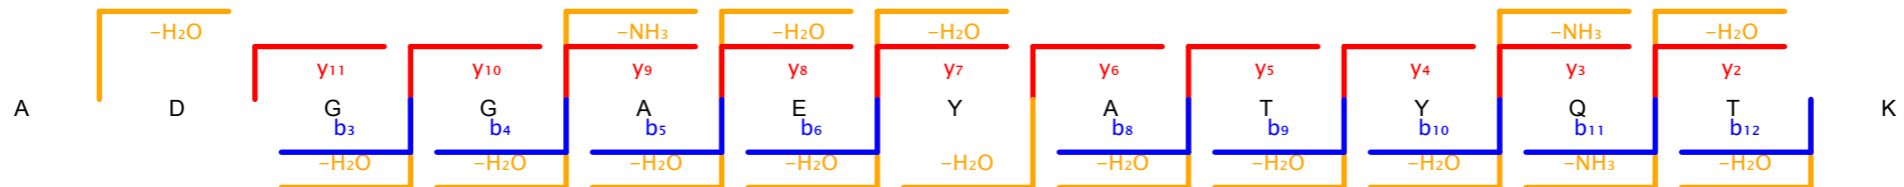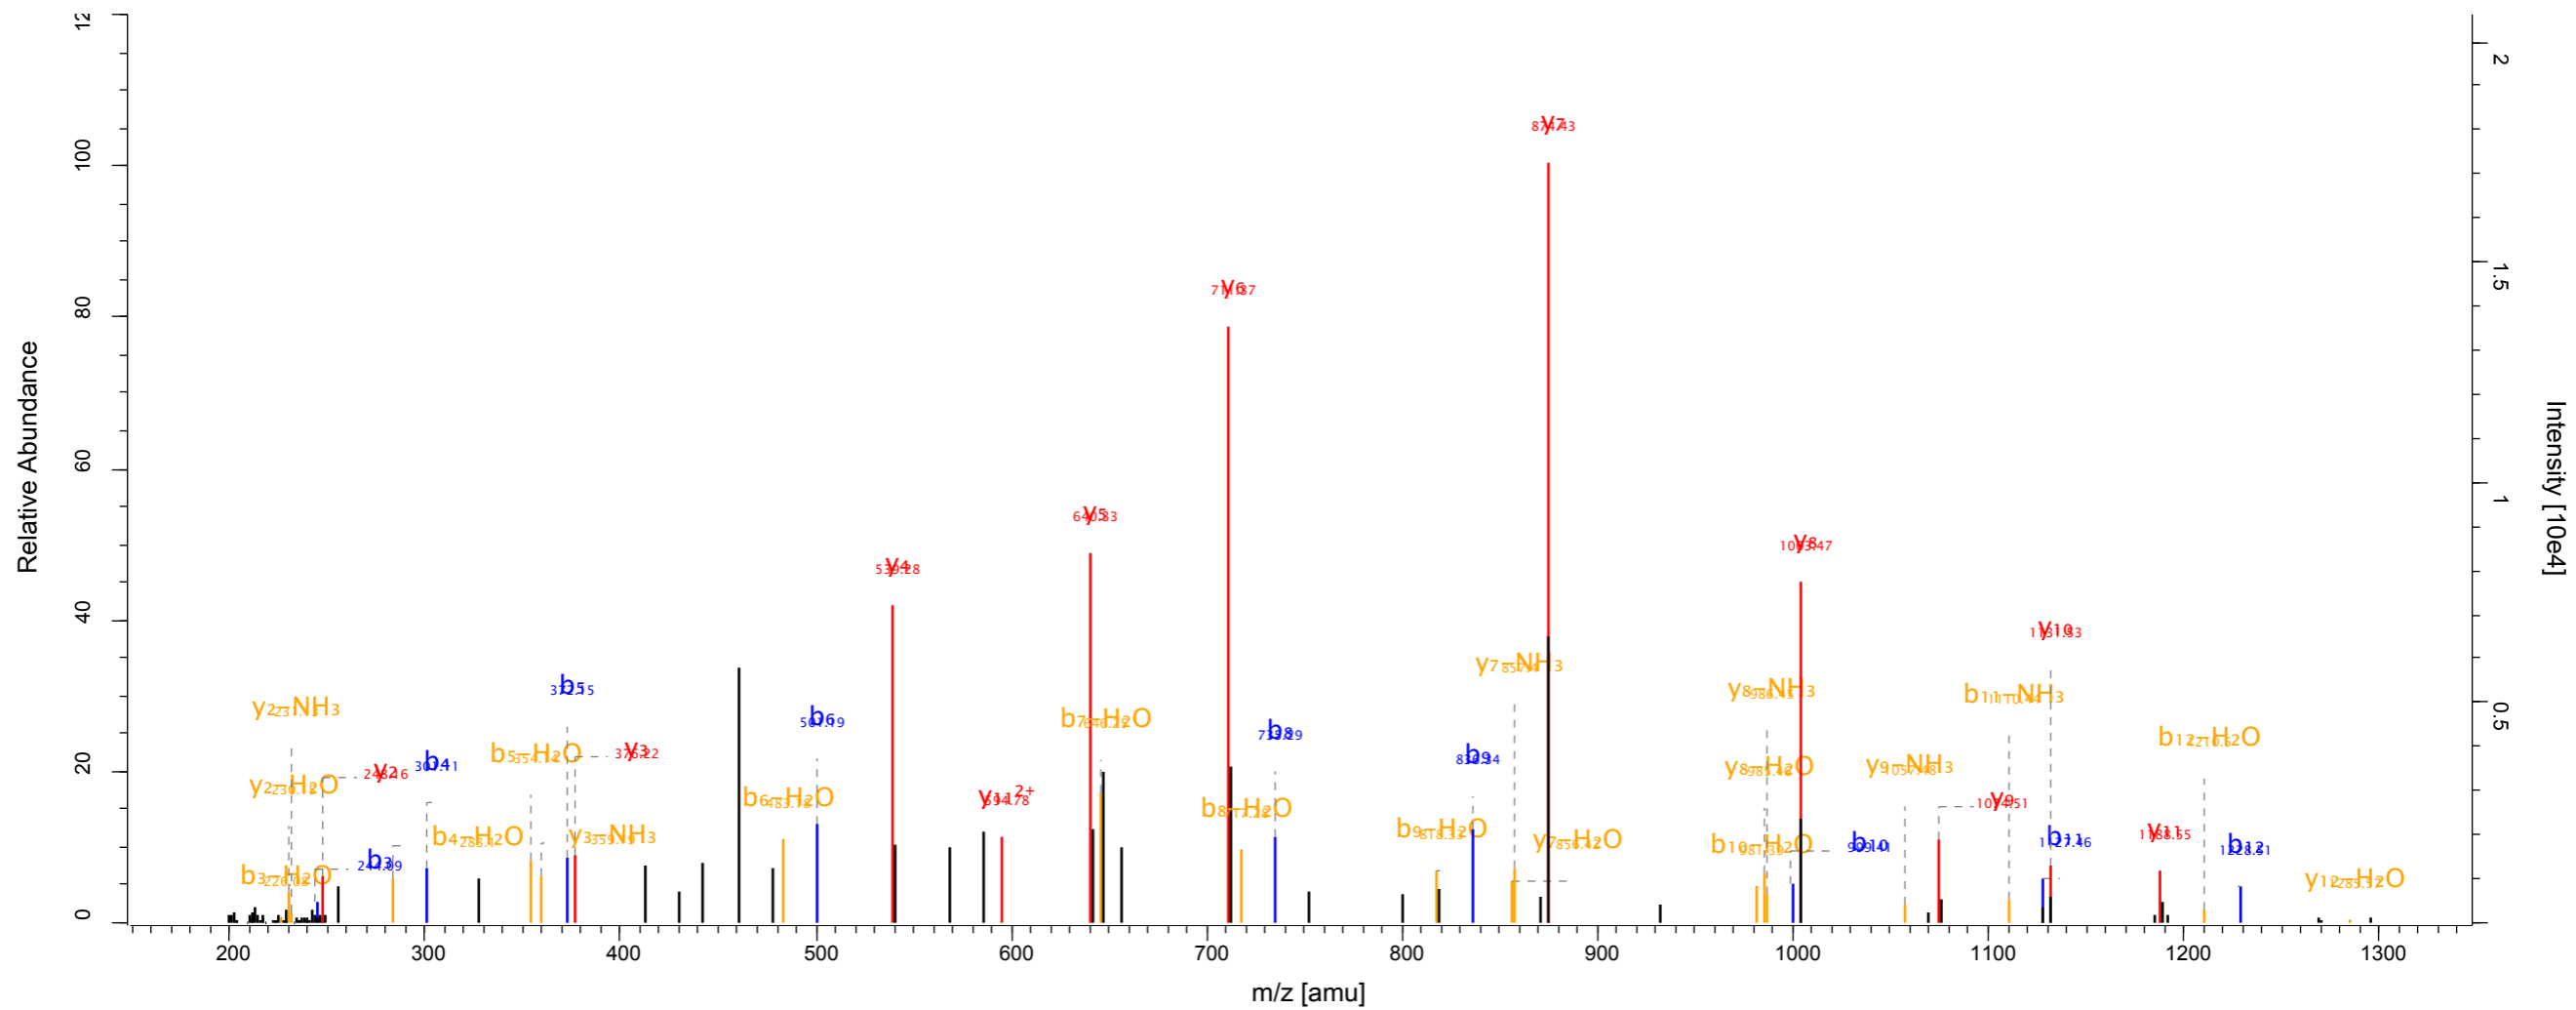

Scan number 3152 Raw file SKaraca\_LMB\_TCE\_Forward\_12\_191011\_rep2  
 Method ITMS; CID Pepti... 141.37

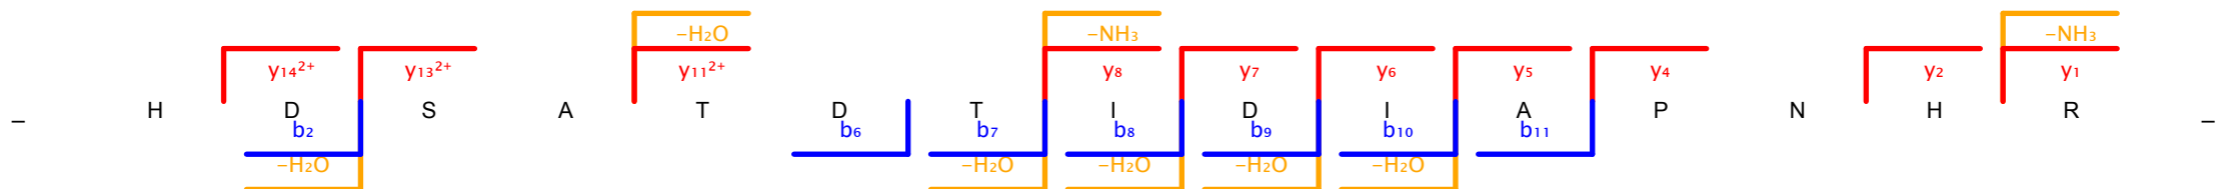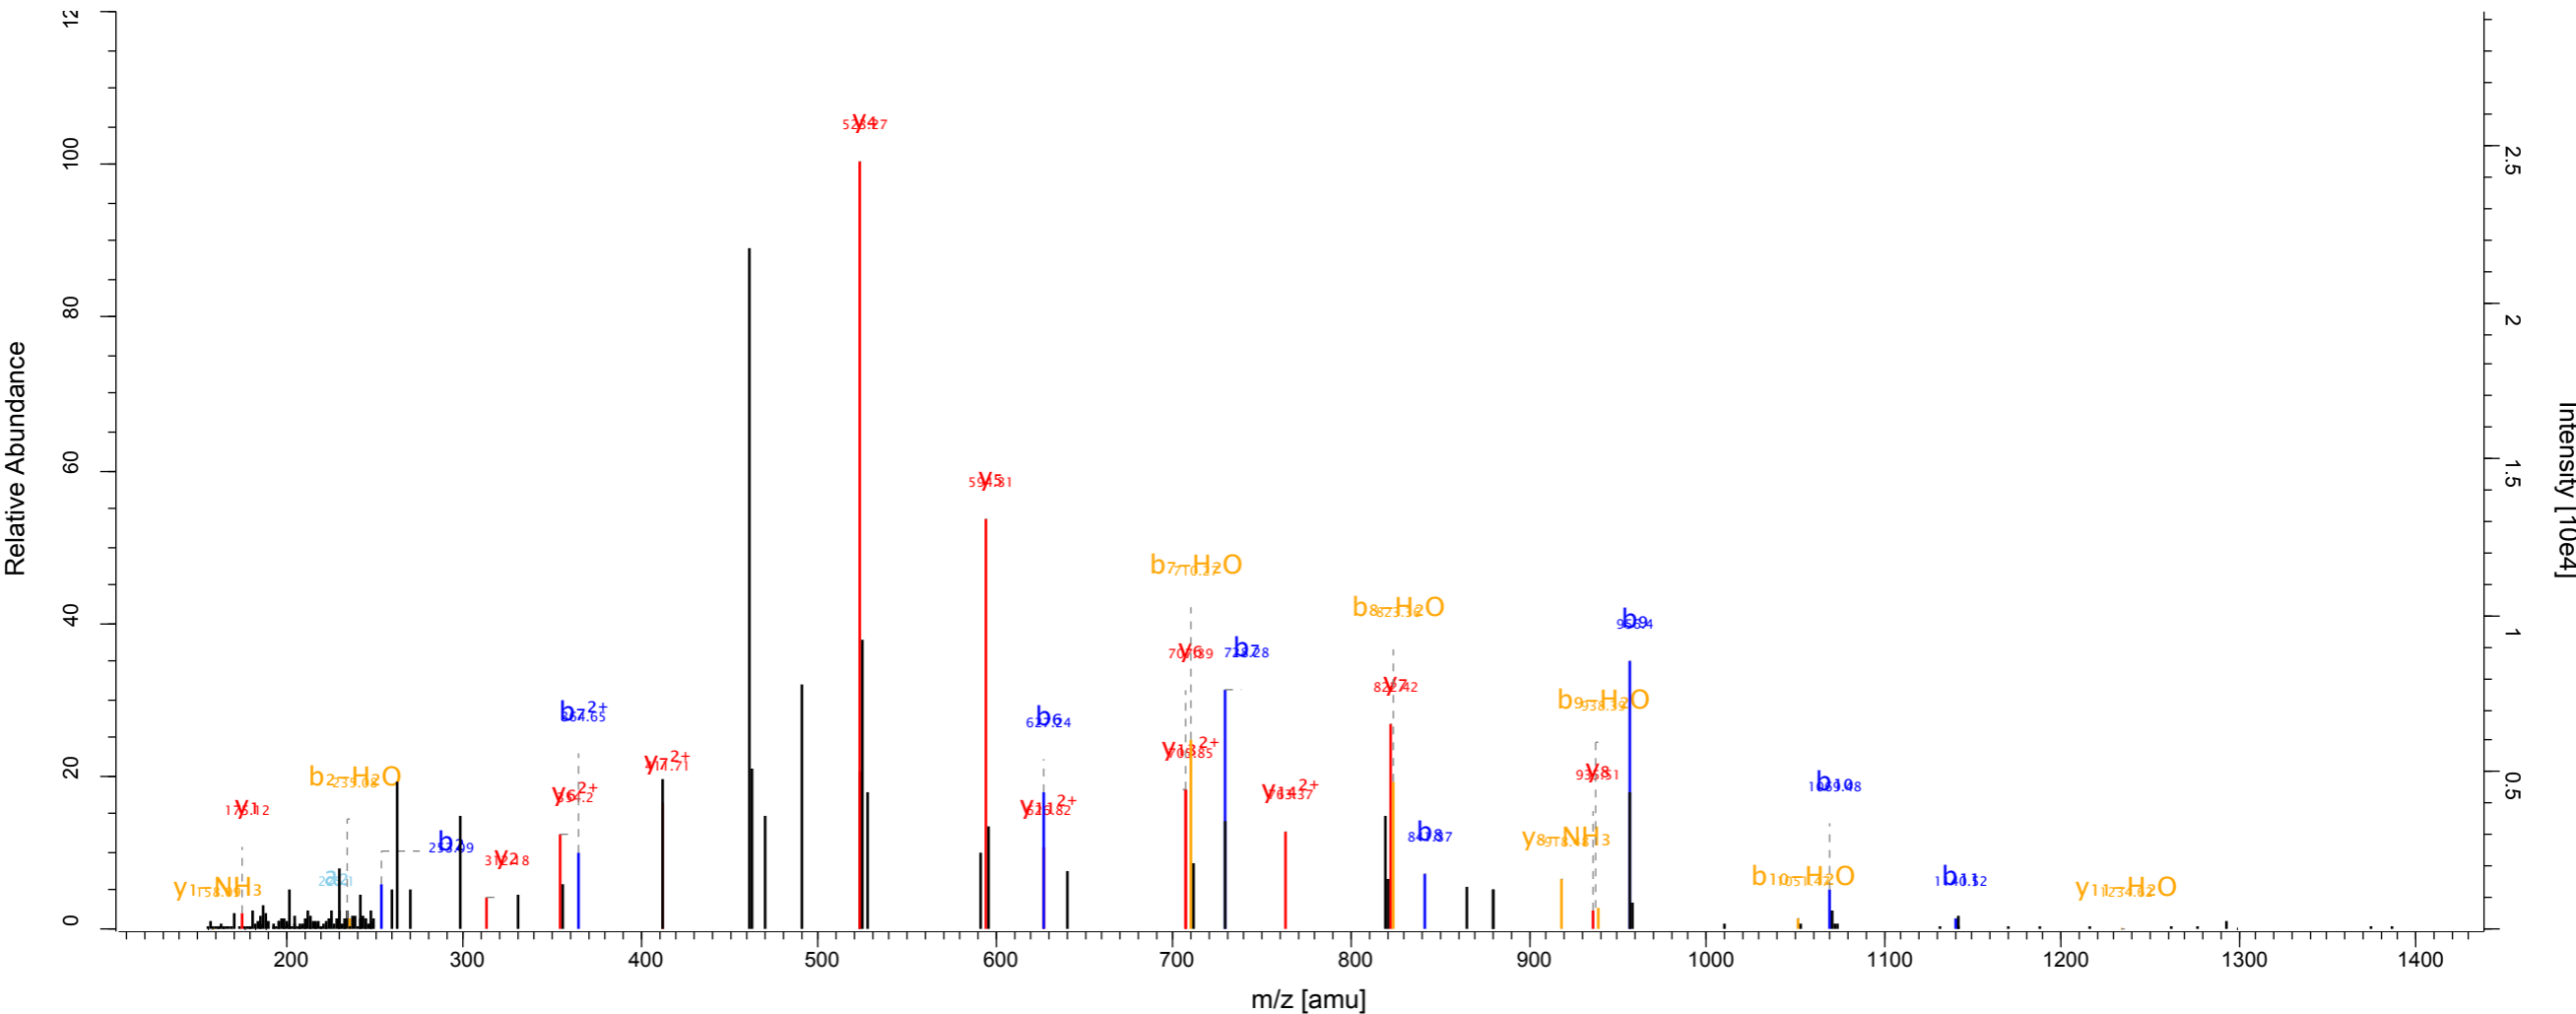

|             |           |          |                                        |
|-------------|-----------|----------|----------------------------------------|
| Scan number | 7869      | Raw file | SKaraca_LMB_TCE_Forward_12_191011_rep2 |
| Method      | ITMS; CID | Pepti... | 169.09                                 |

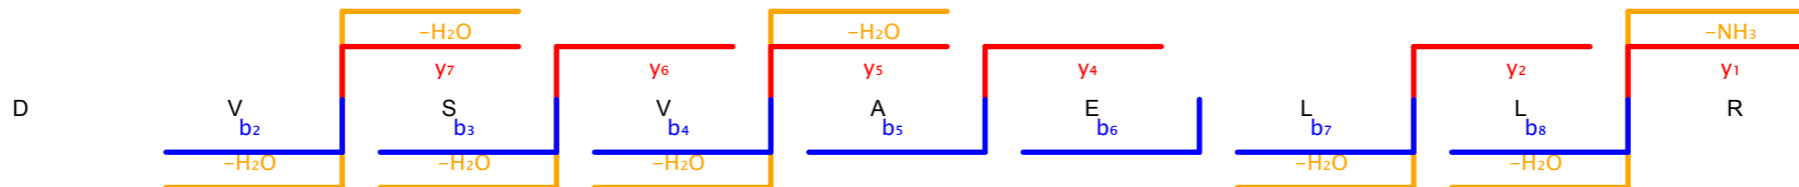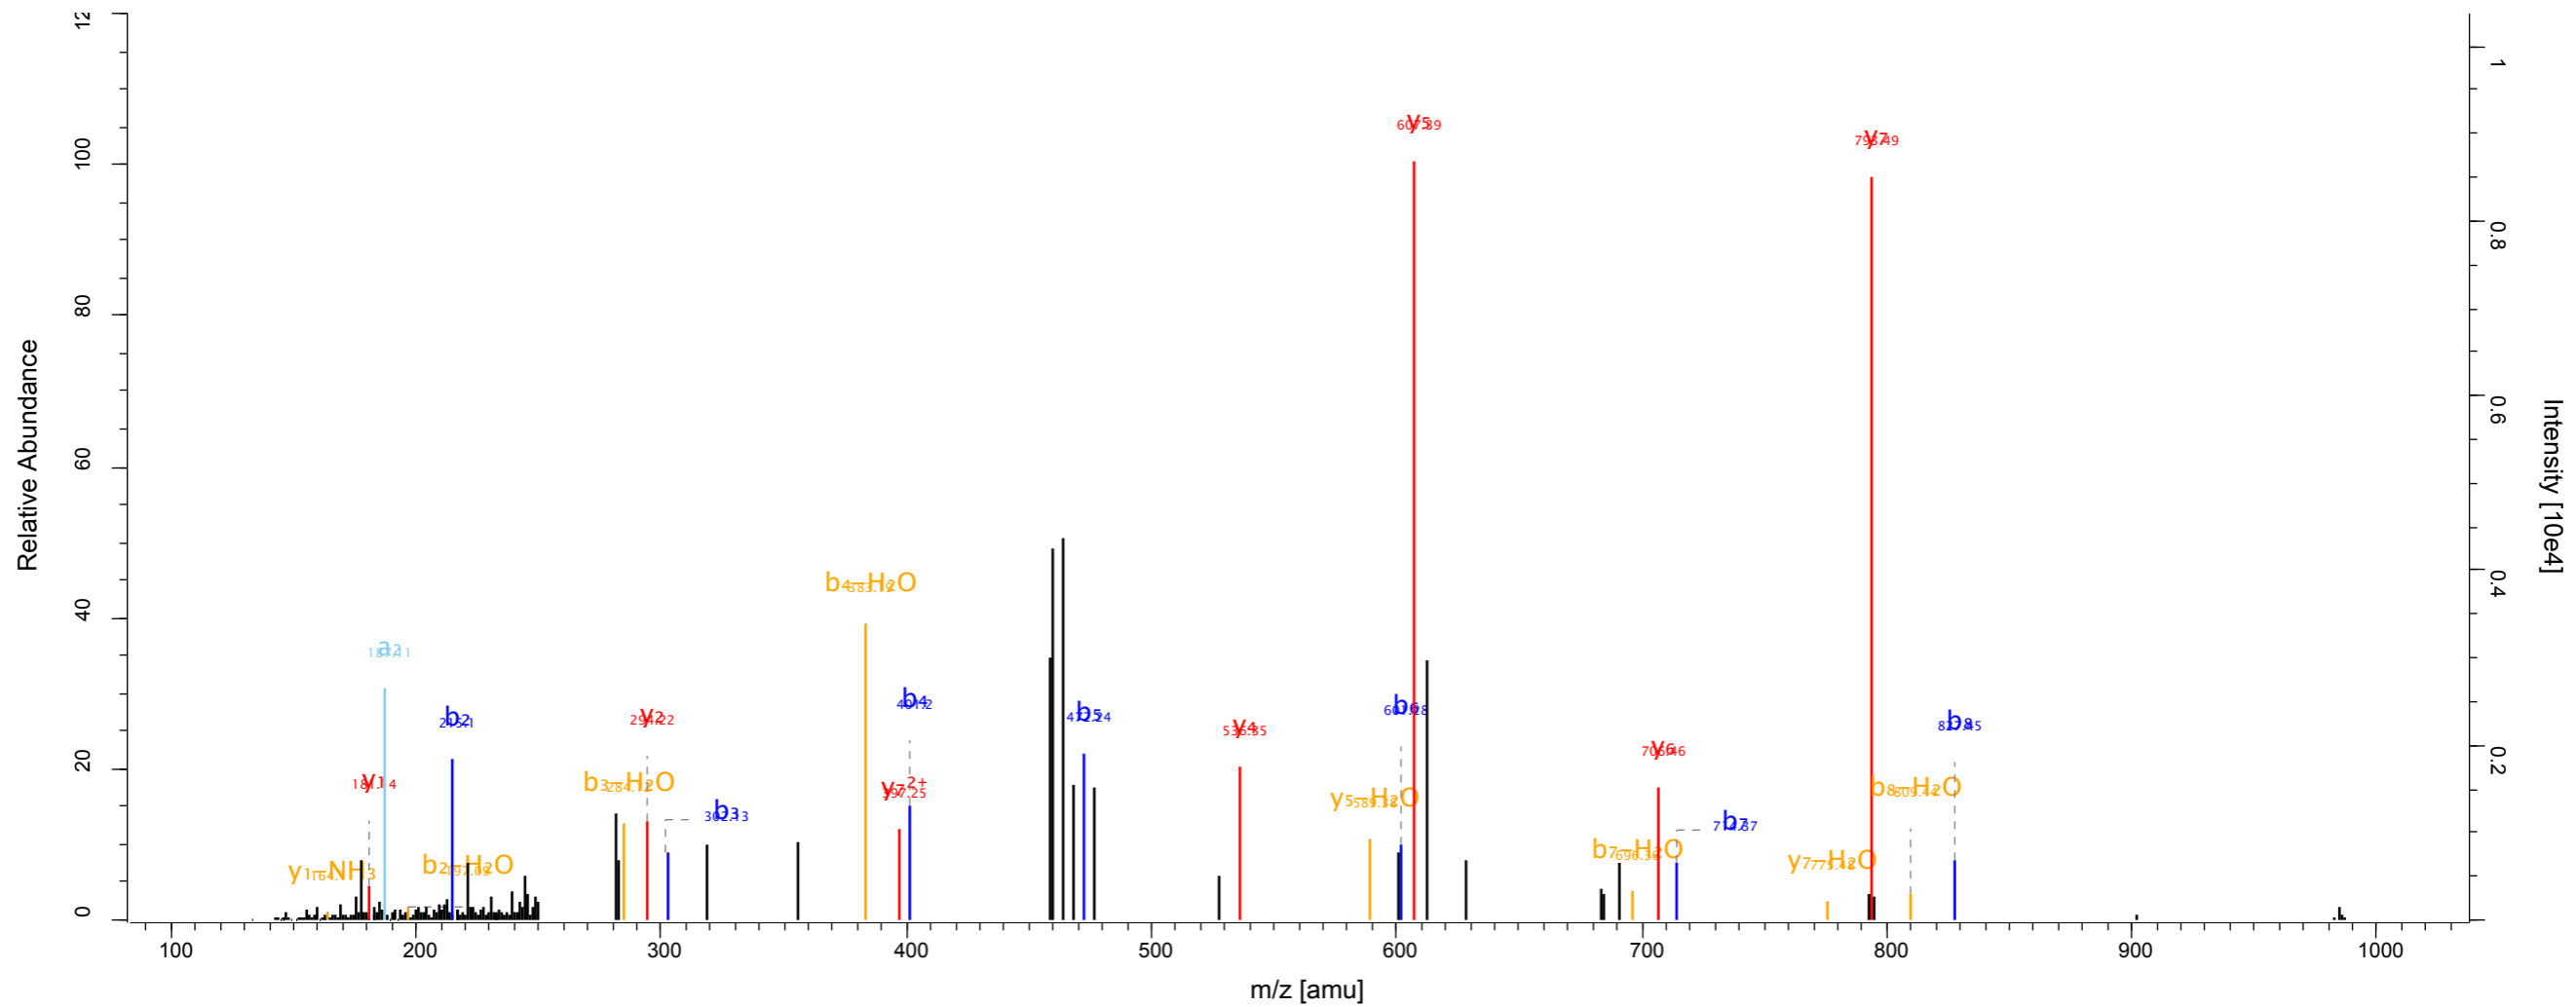

|             |           |          |                                        |
|-------------|-----------|----------|----------------------------------------|
| Scan number | 8421      | Raw file | SKaraca_LMB_TCE_Forward_12_191011_rep2 |
| Method      | ITMS; CID | Pepti... | 130.1                                  |

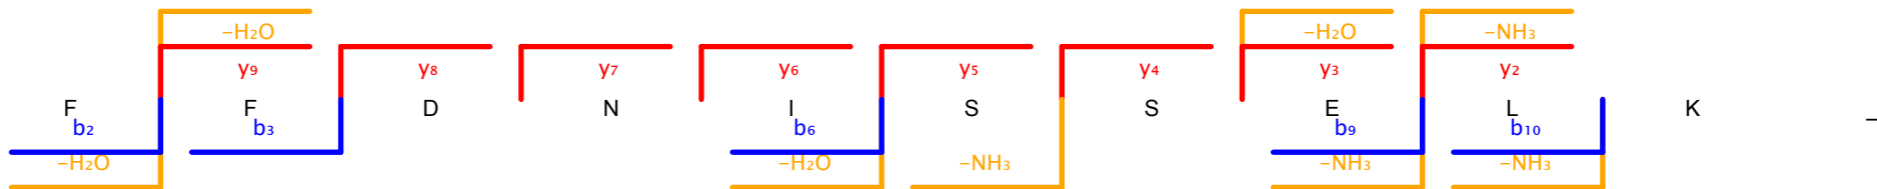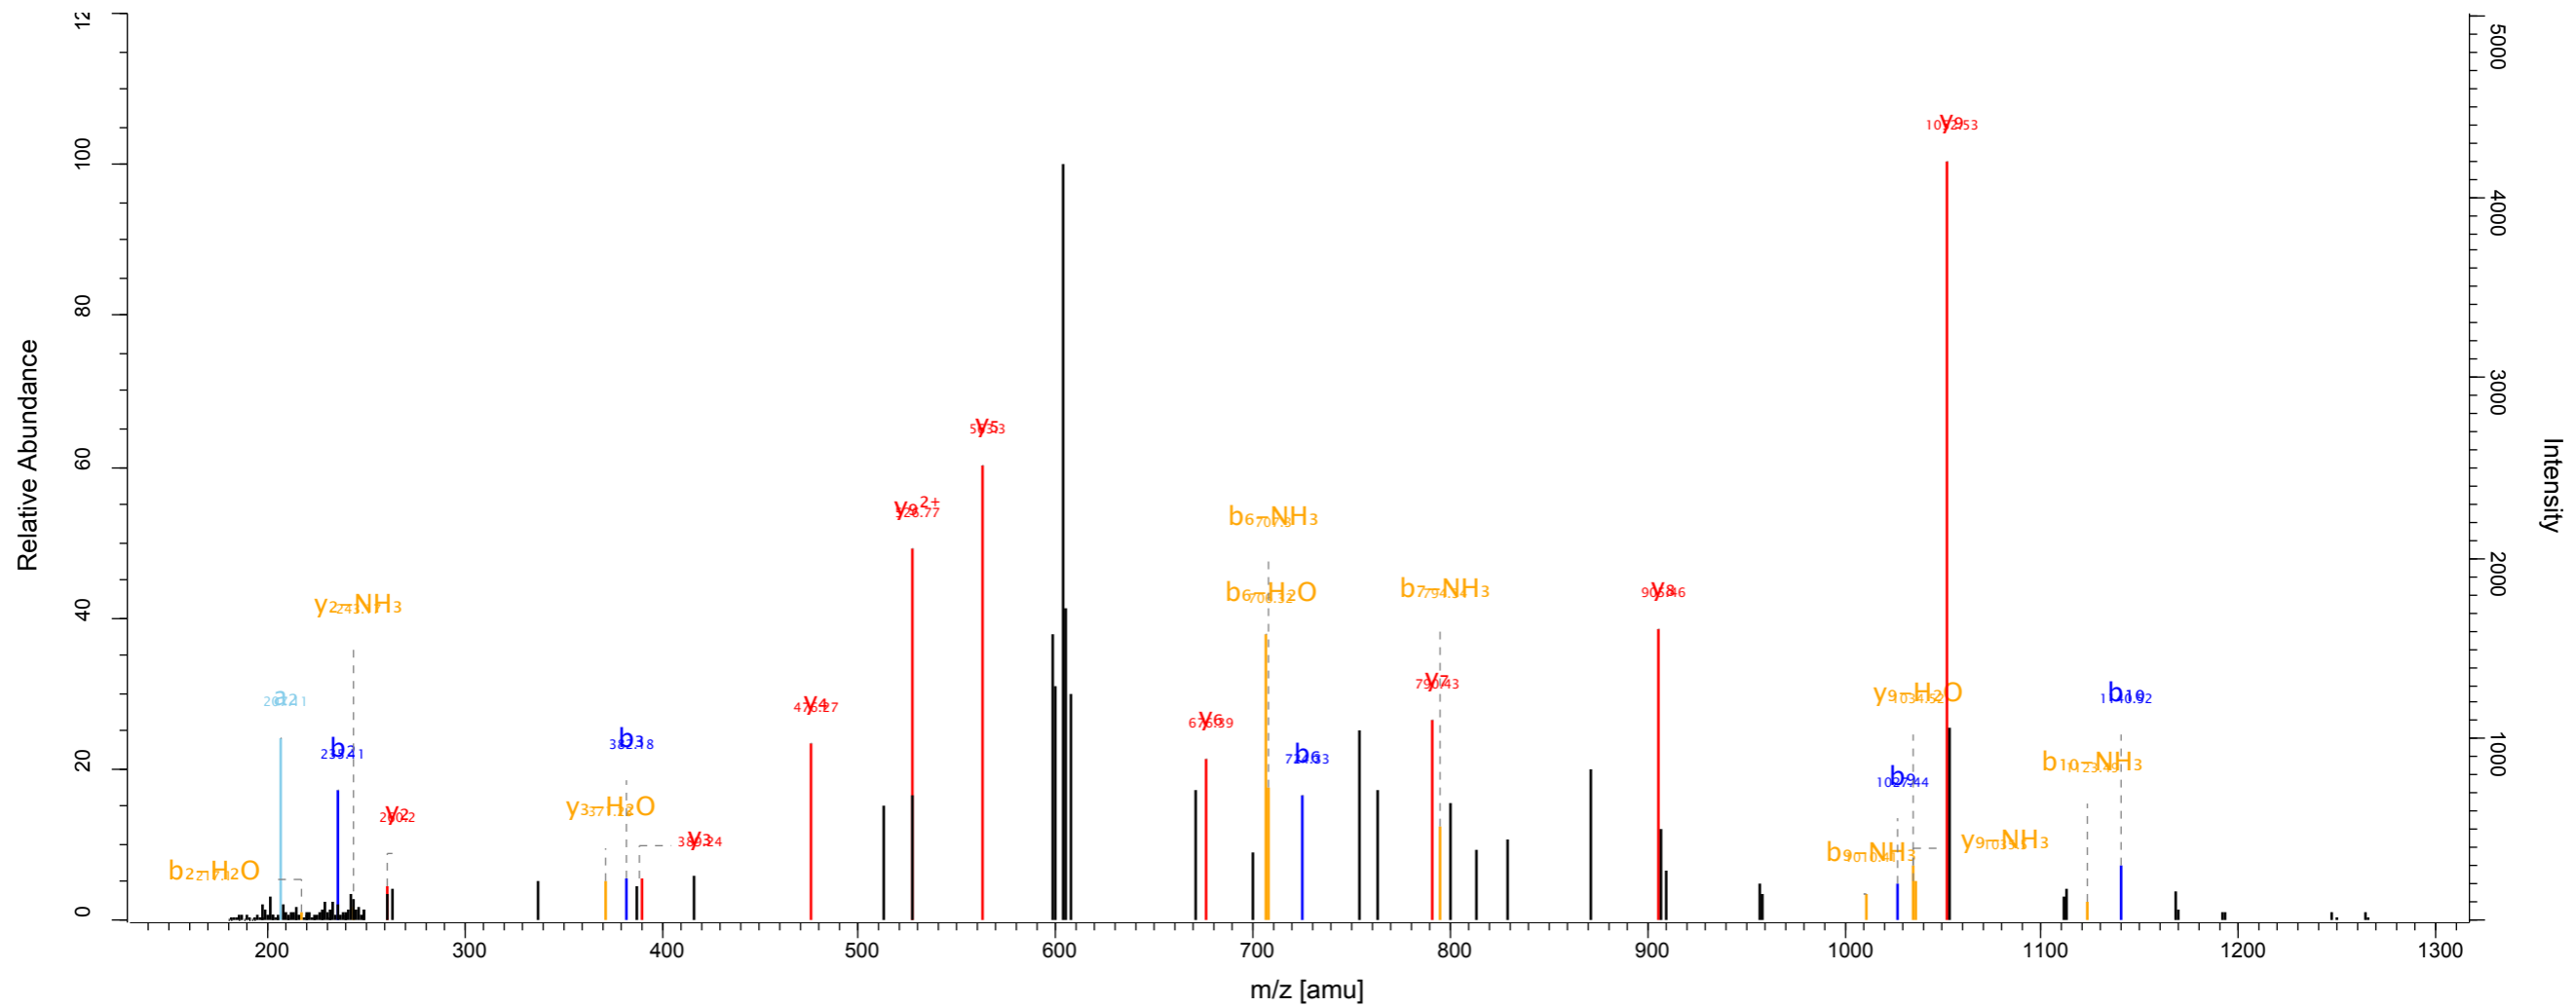

Scan number 8953 Raw file SKaraca\_LMB\_TCE\_Forward\_12\_191011\_rep2  
 Method ITMS; CID Pepti... 154.15

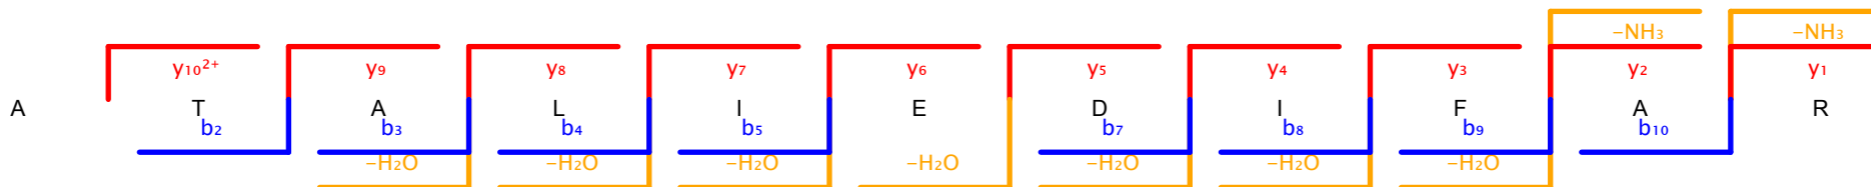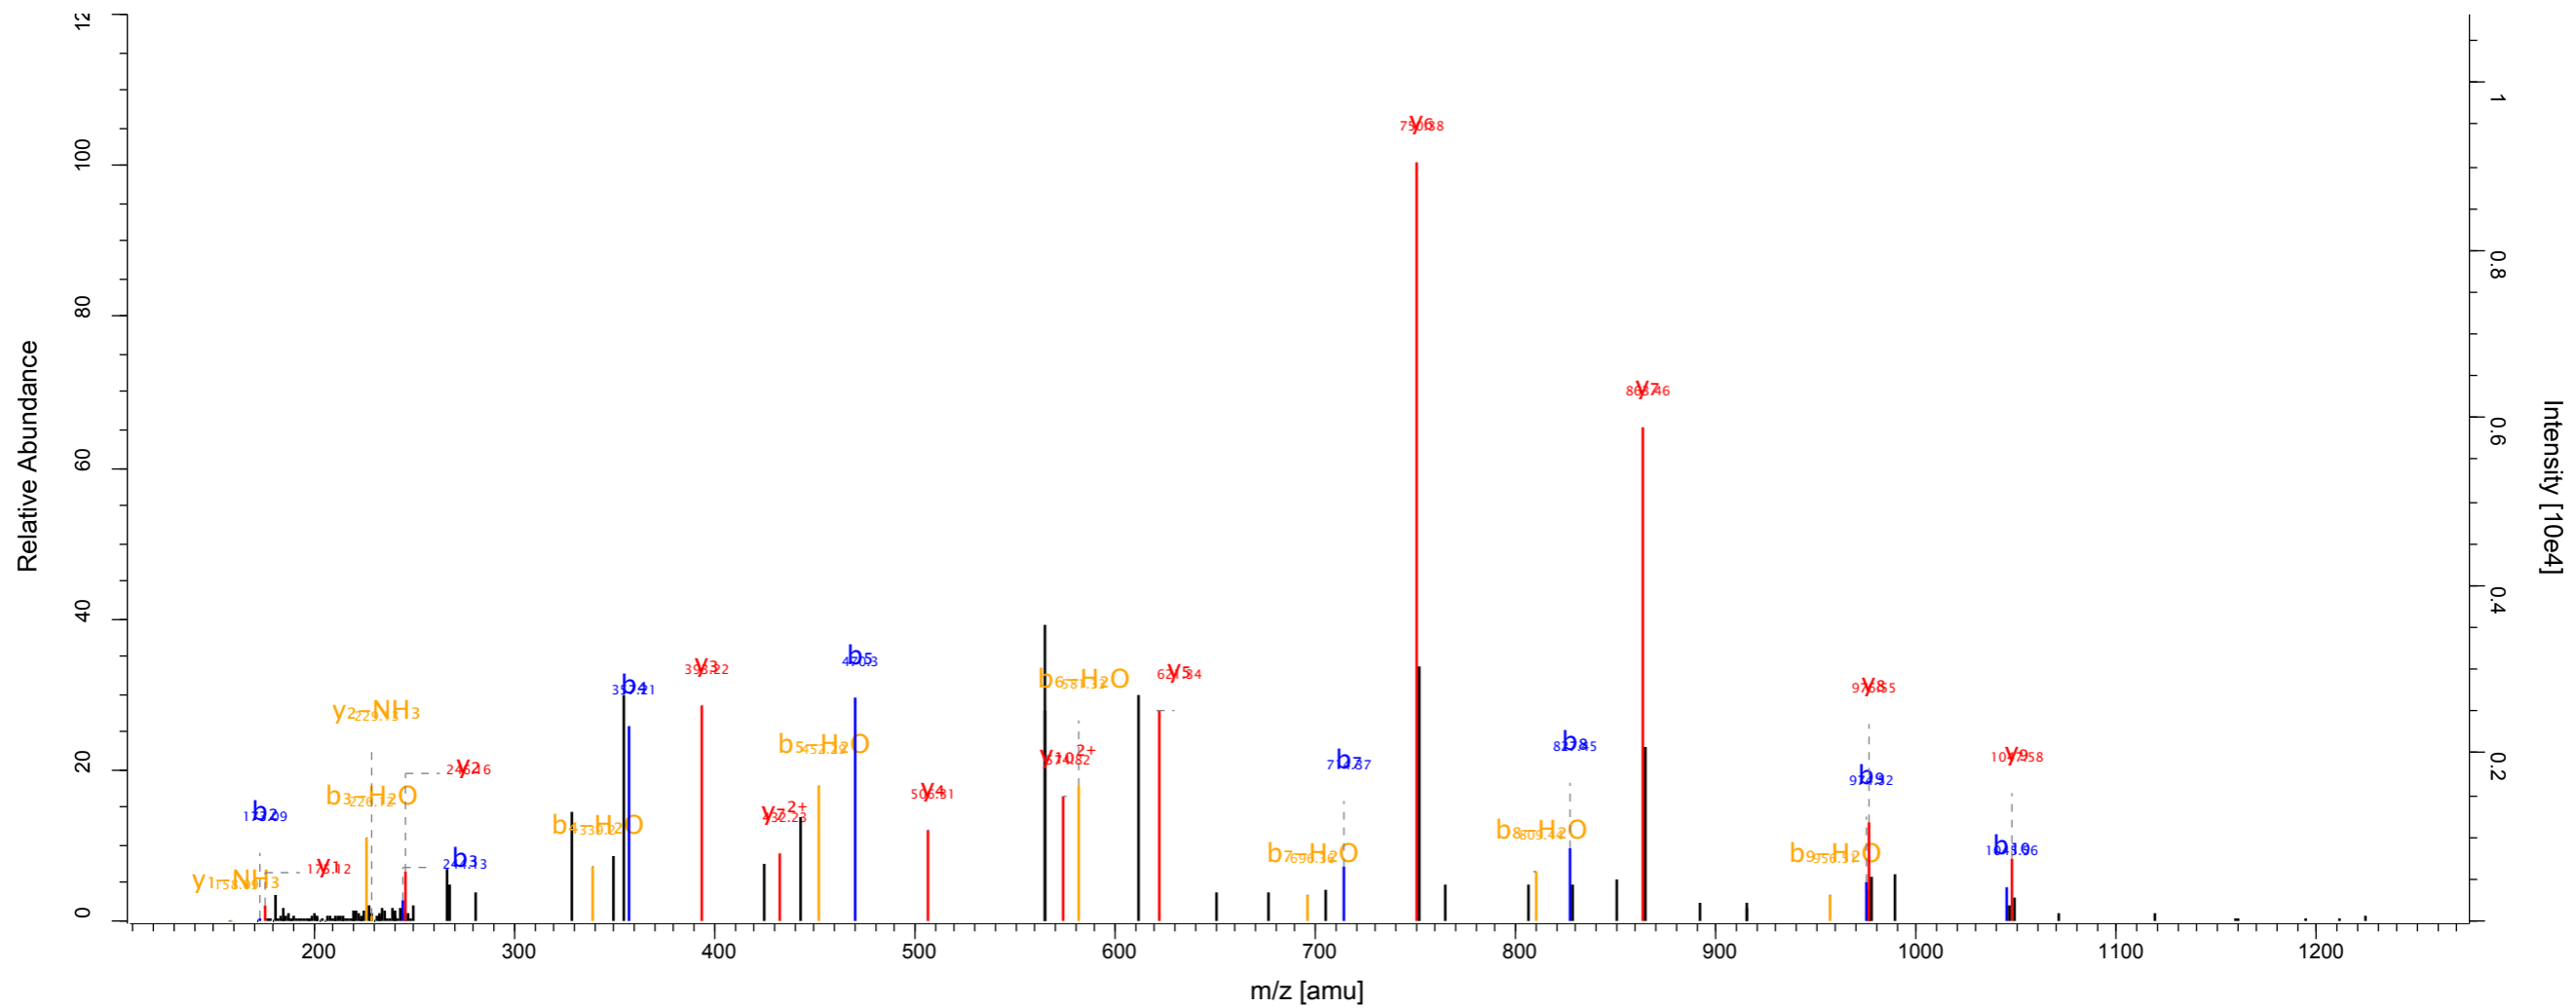

Scan number 9207 Raw file SKaraca\_LMB\_TCE\_Forward\_12\_191011\_rep2  
 Method ITMS; CID Pepti... 131.5

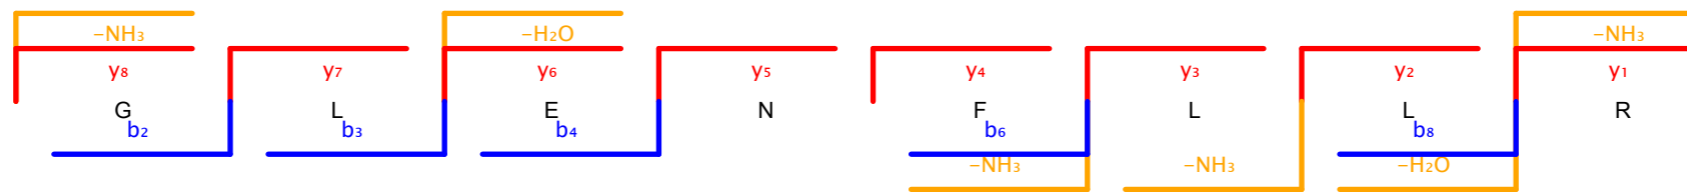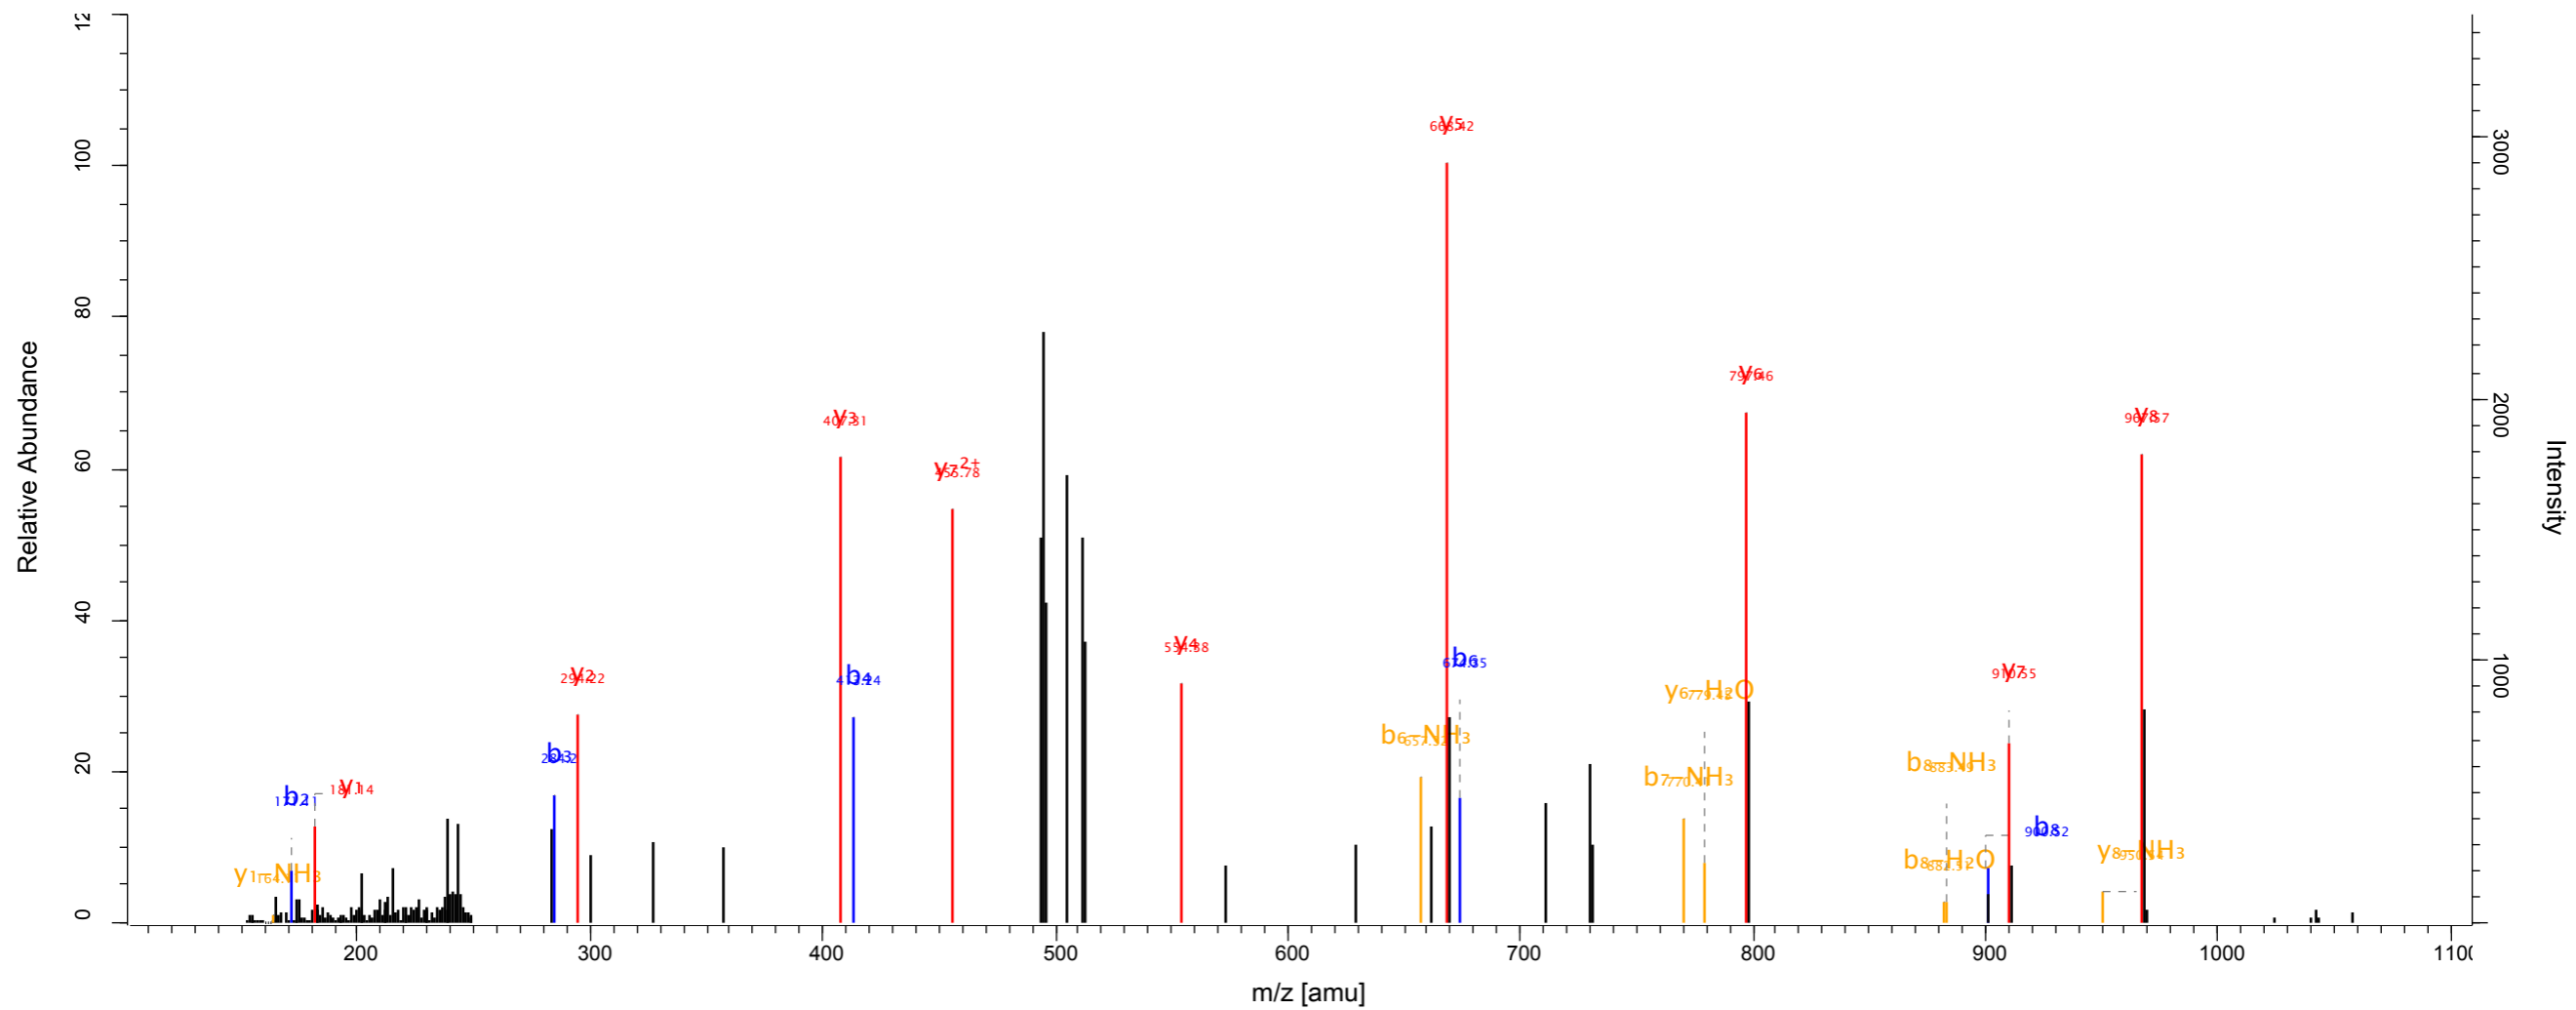

Scan number 9278 Raw file SKaraca\_LMB\_TCE\_Forward\_12\_191011\_rep2  
 Method ITMS; CID Pepti... 114.69

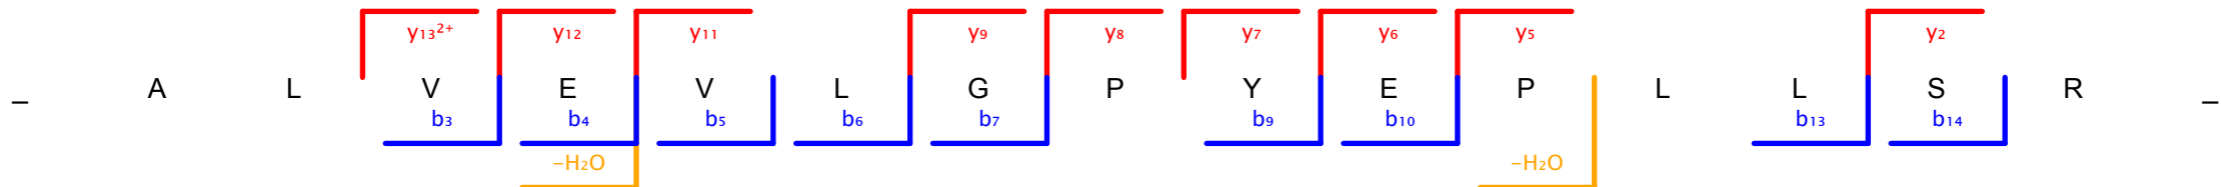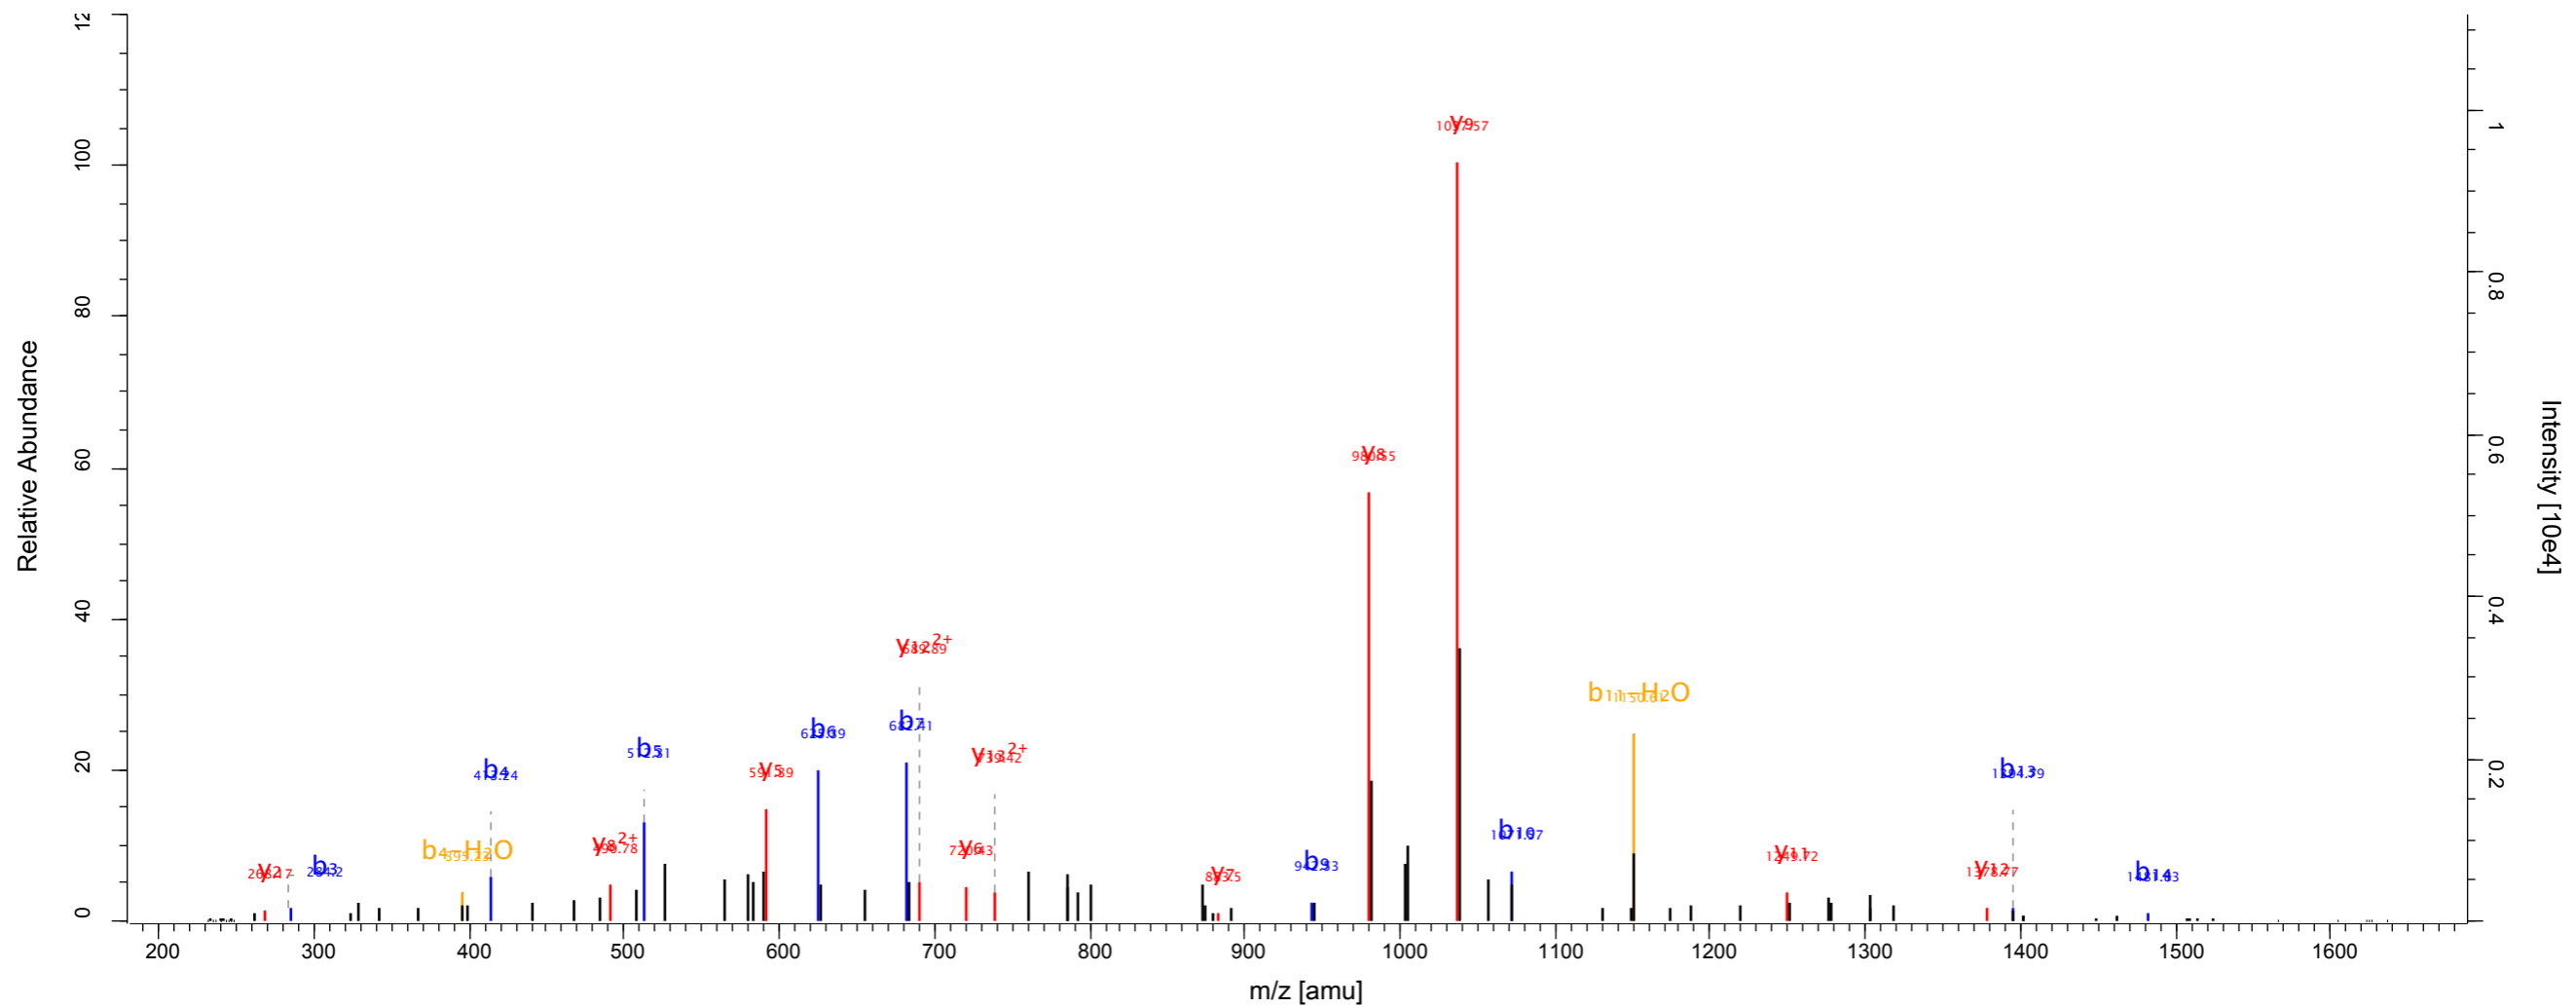

Scan number 10544 Raw file SKaraca\_LMB\_TCE\_Forward\_13\_191011\_rep1  
 Method ITMS; CID Pepti... 167.92

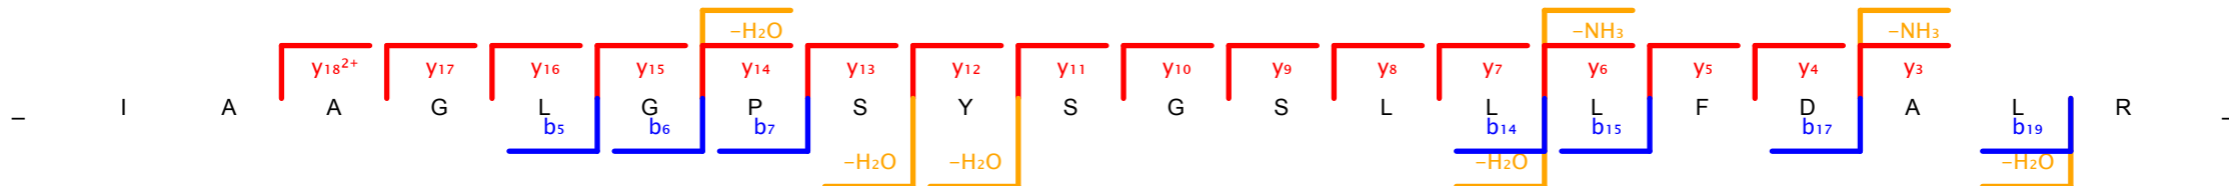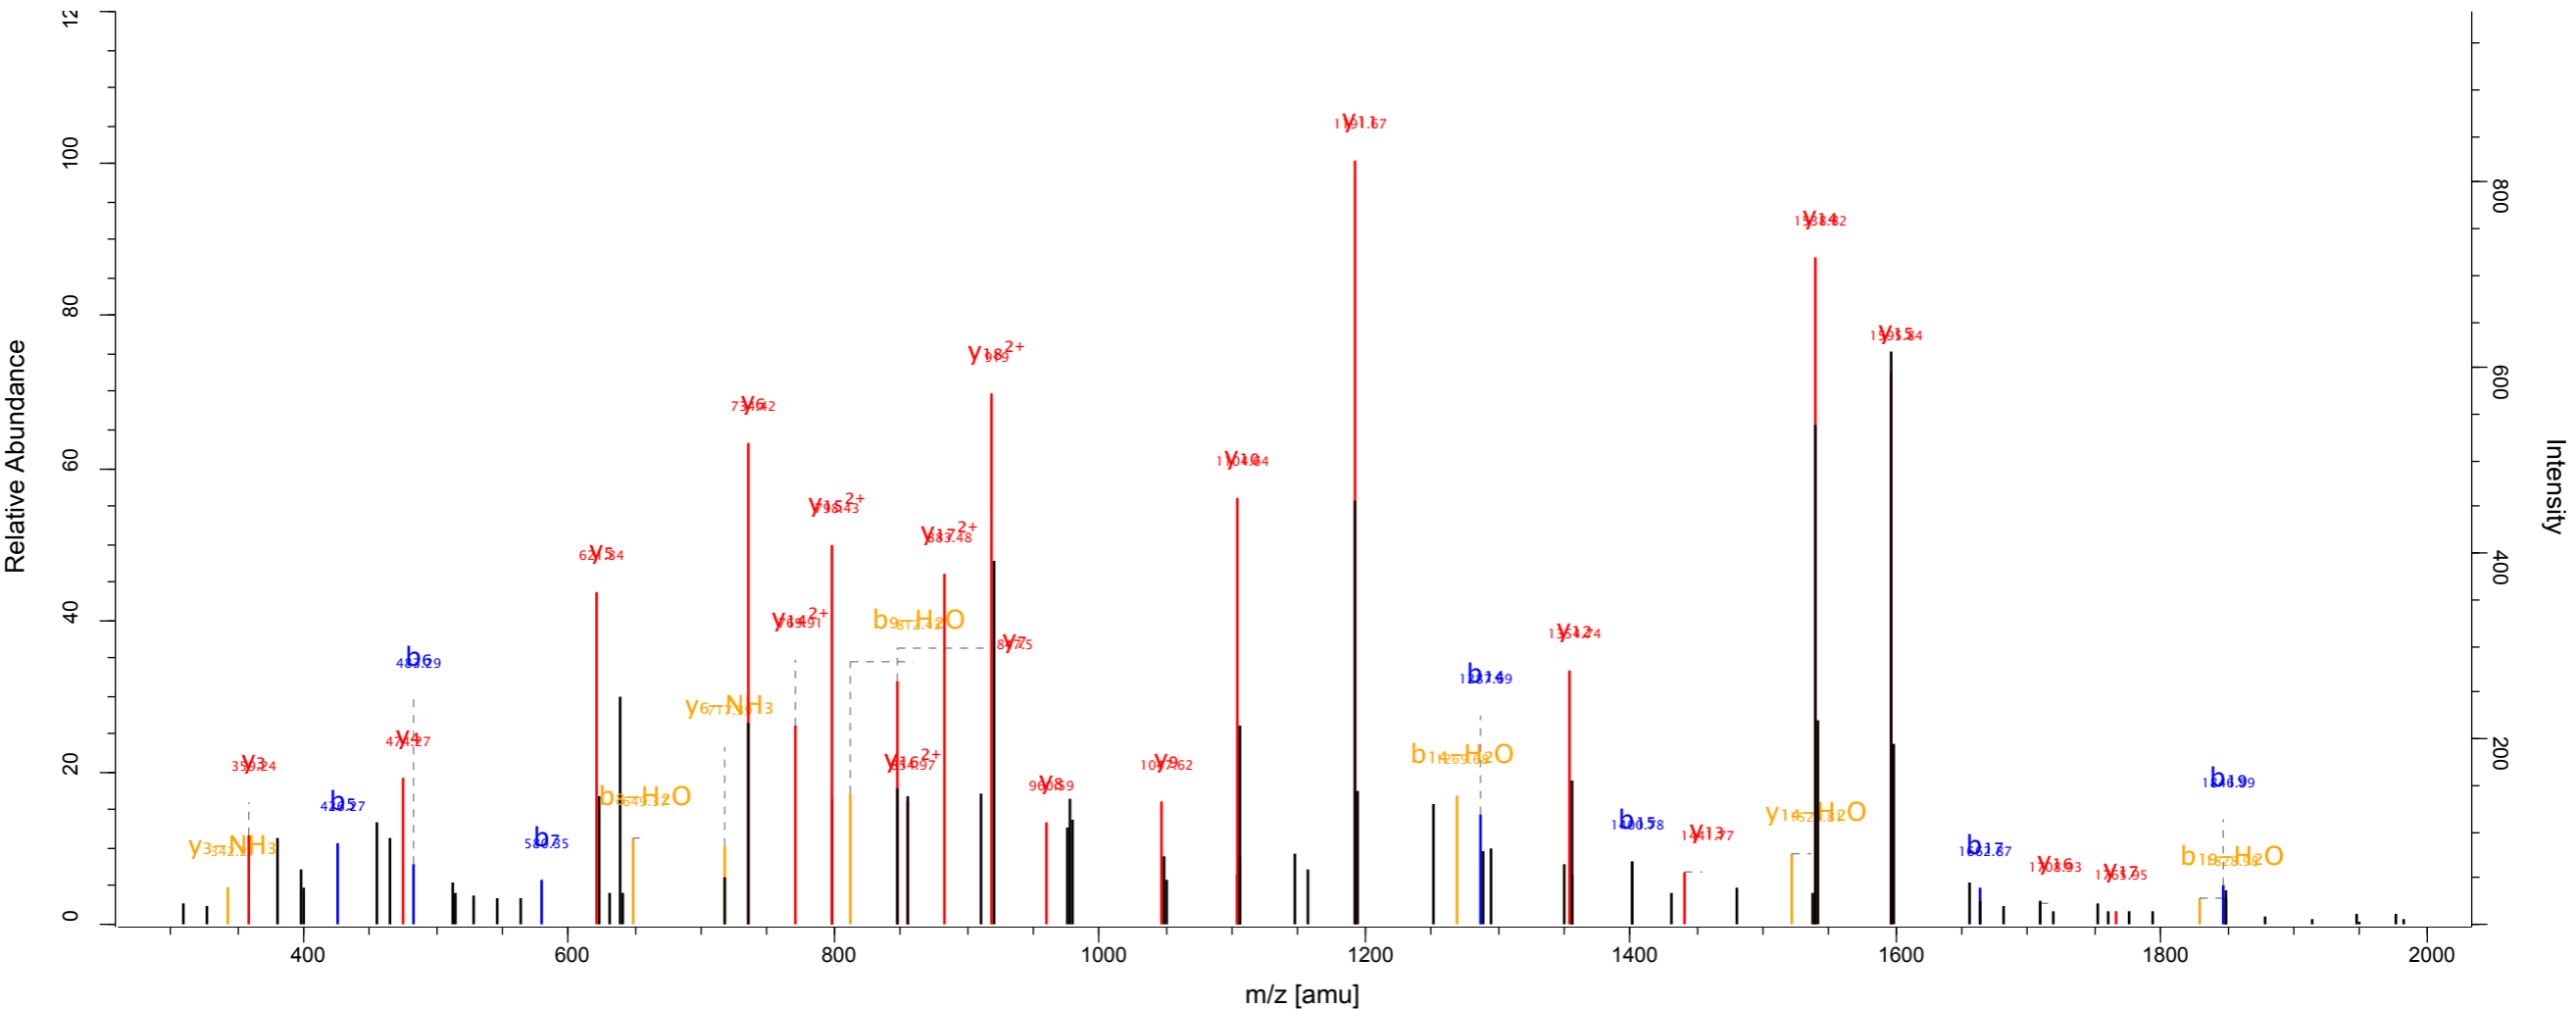



Scan number 11298 Raw file SKaraca\_LMB\_TCE\_Forward\_13\_191011\_rep1  
 Method ITMS; CID Pepti... 130.72

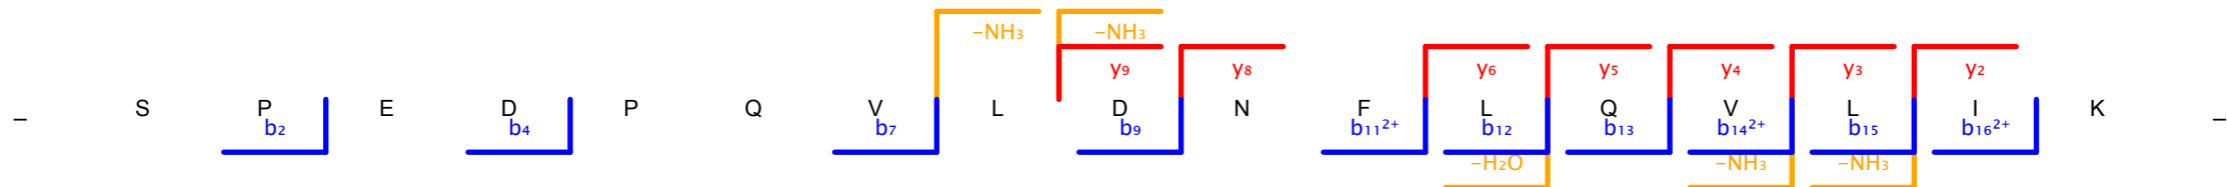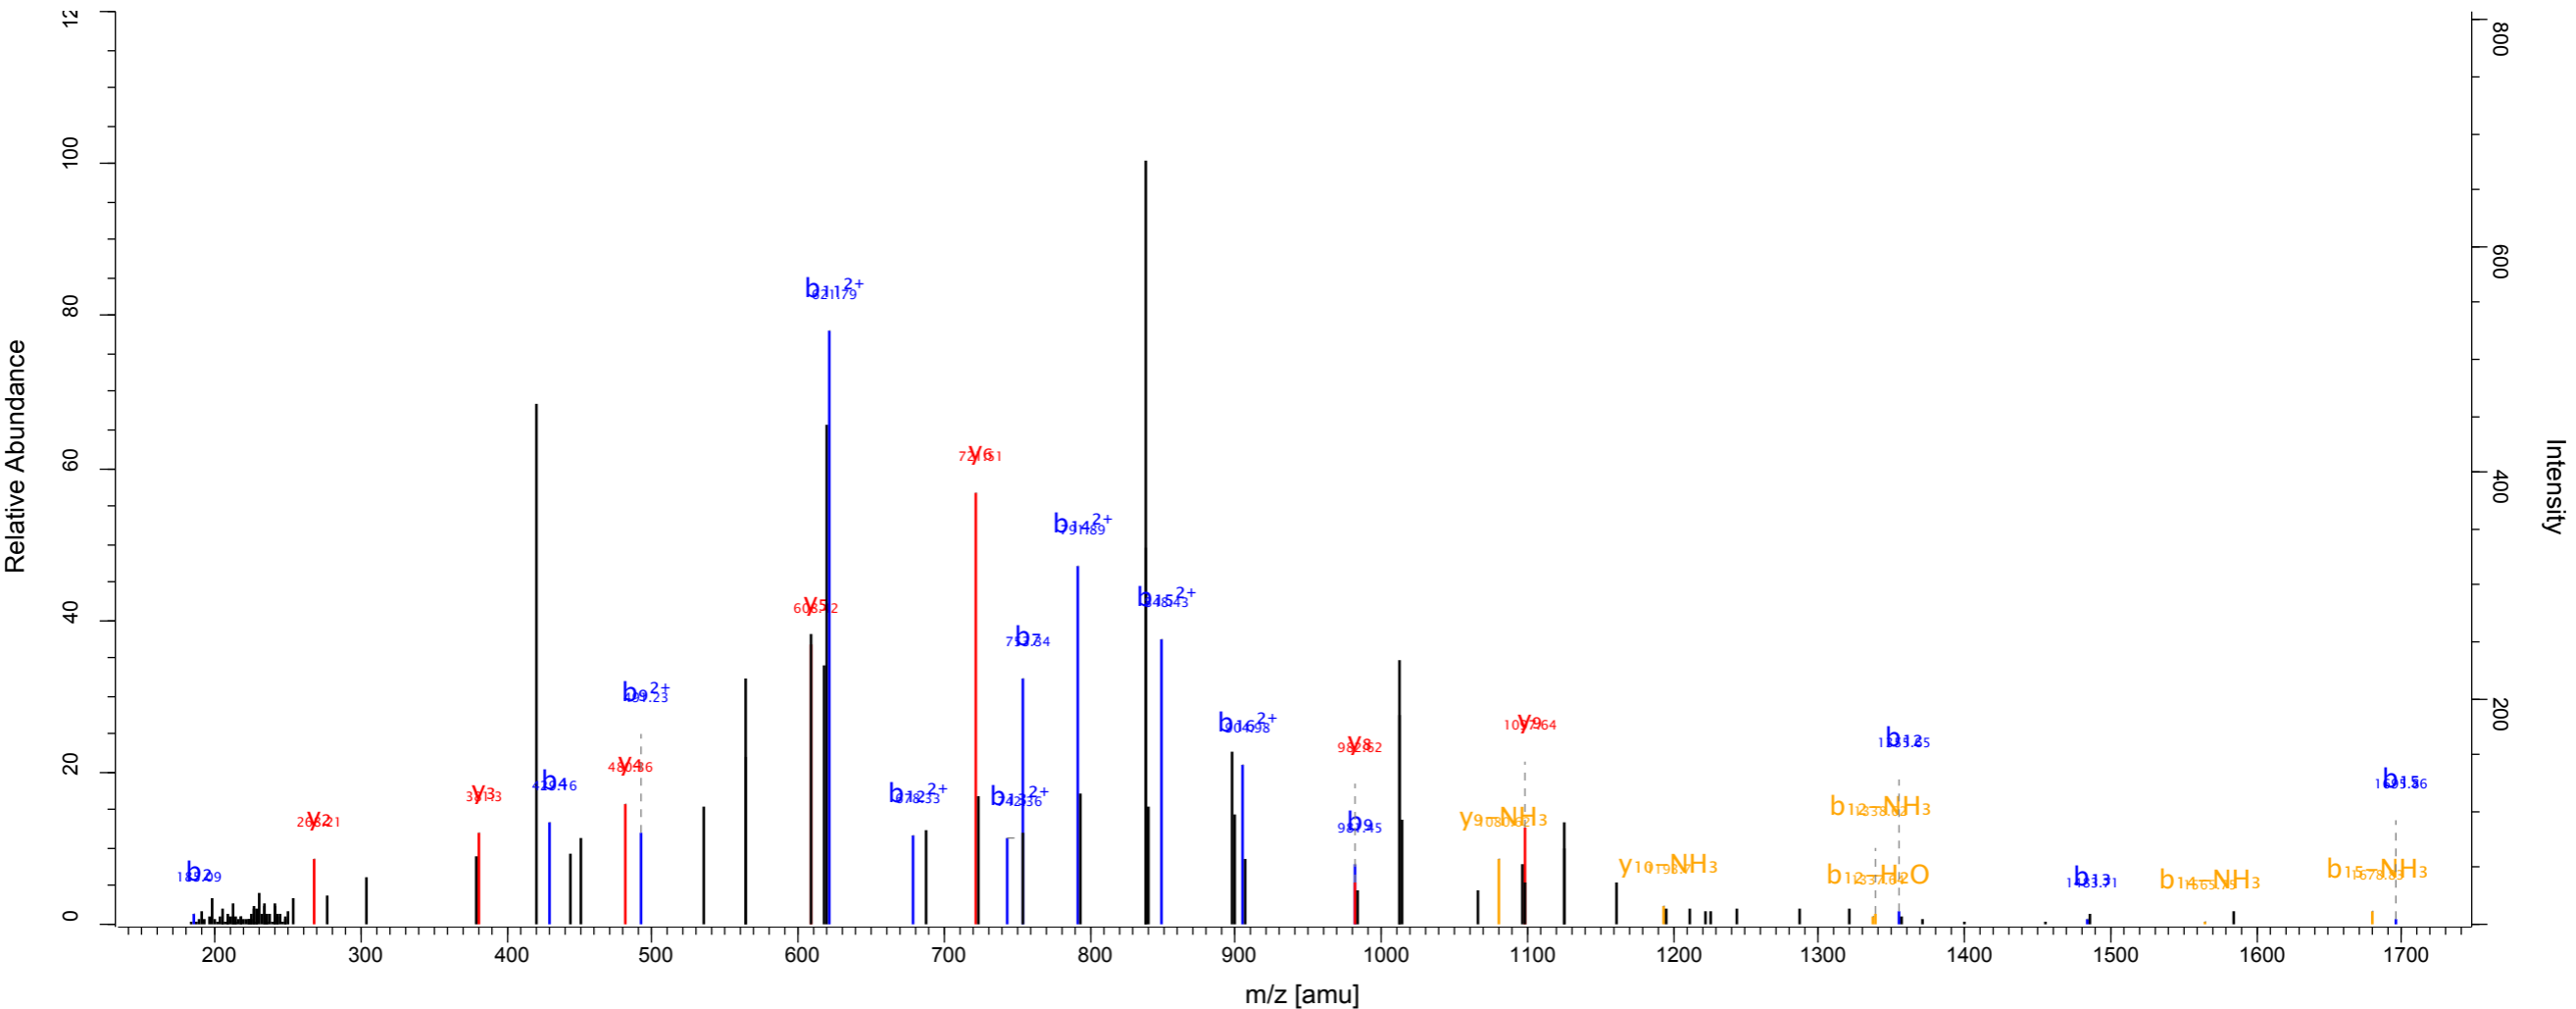

Scan number 10937 Raw file SKaraca\_LMB\_TCE\_Forward\_13\_191011\_rep2  
 Method ITMS; CID Pepti... 162.11

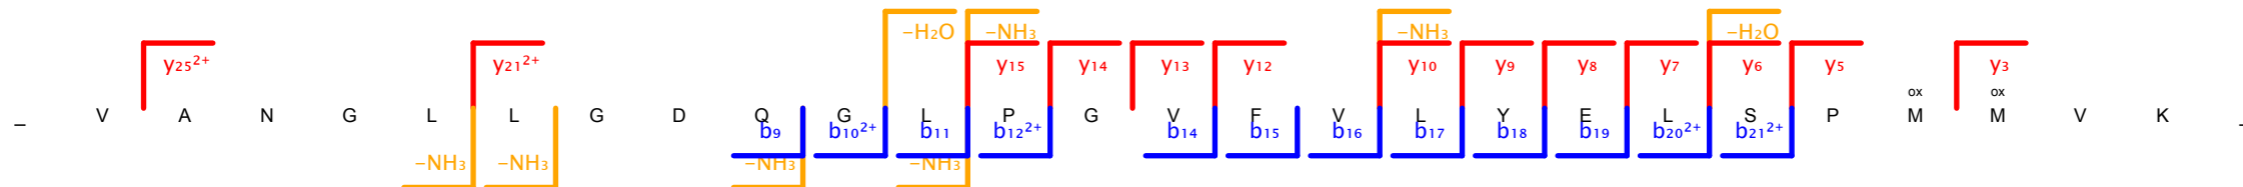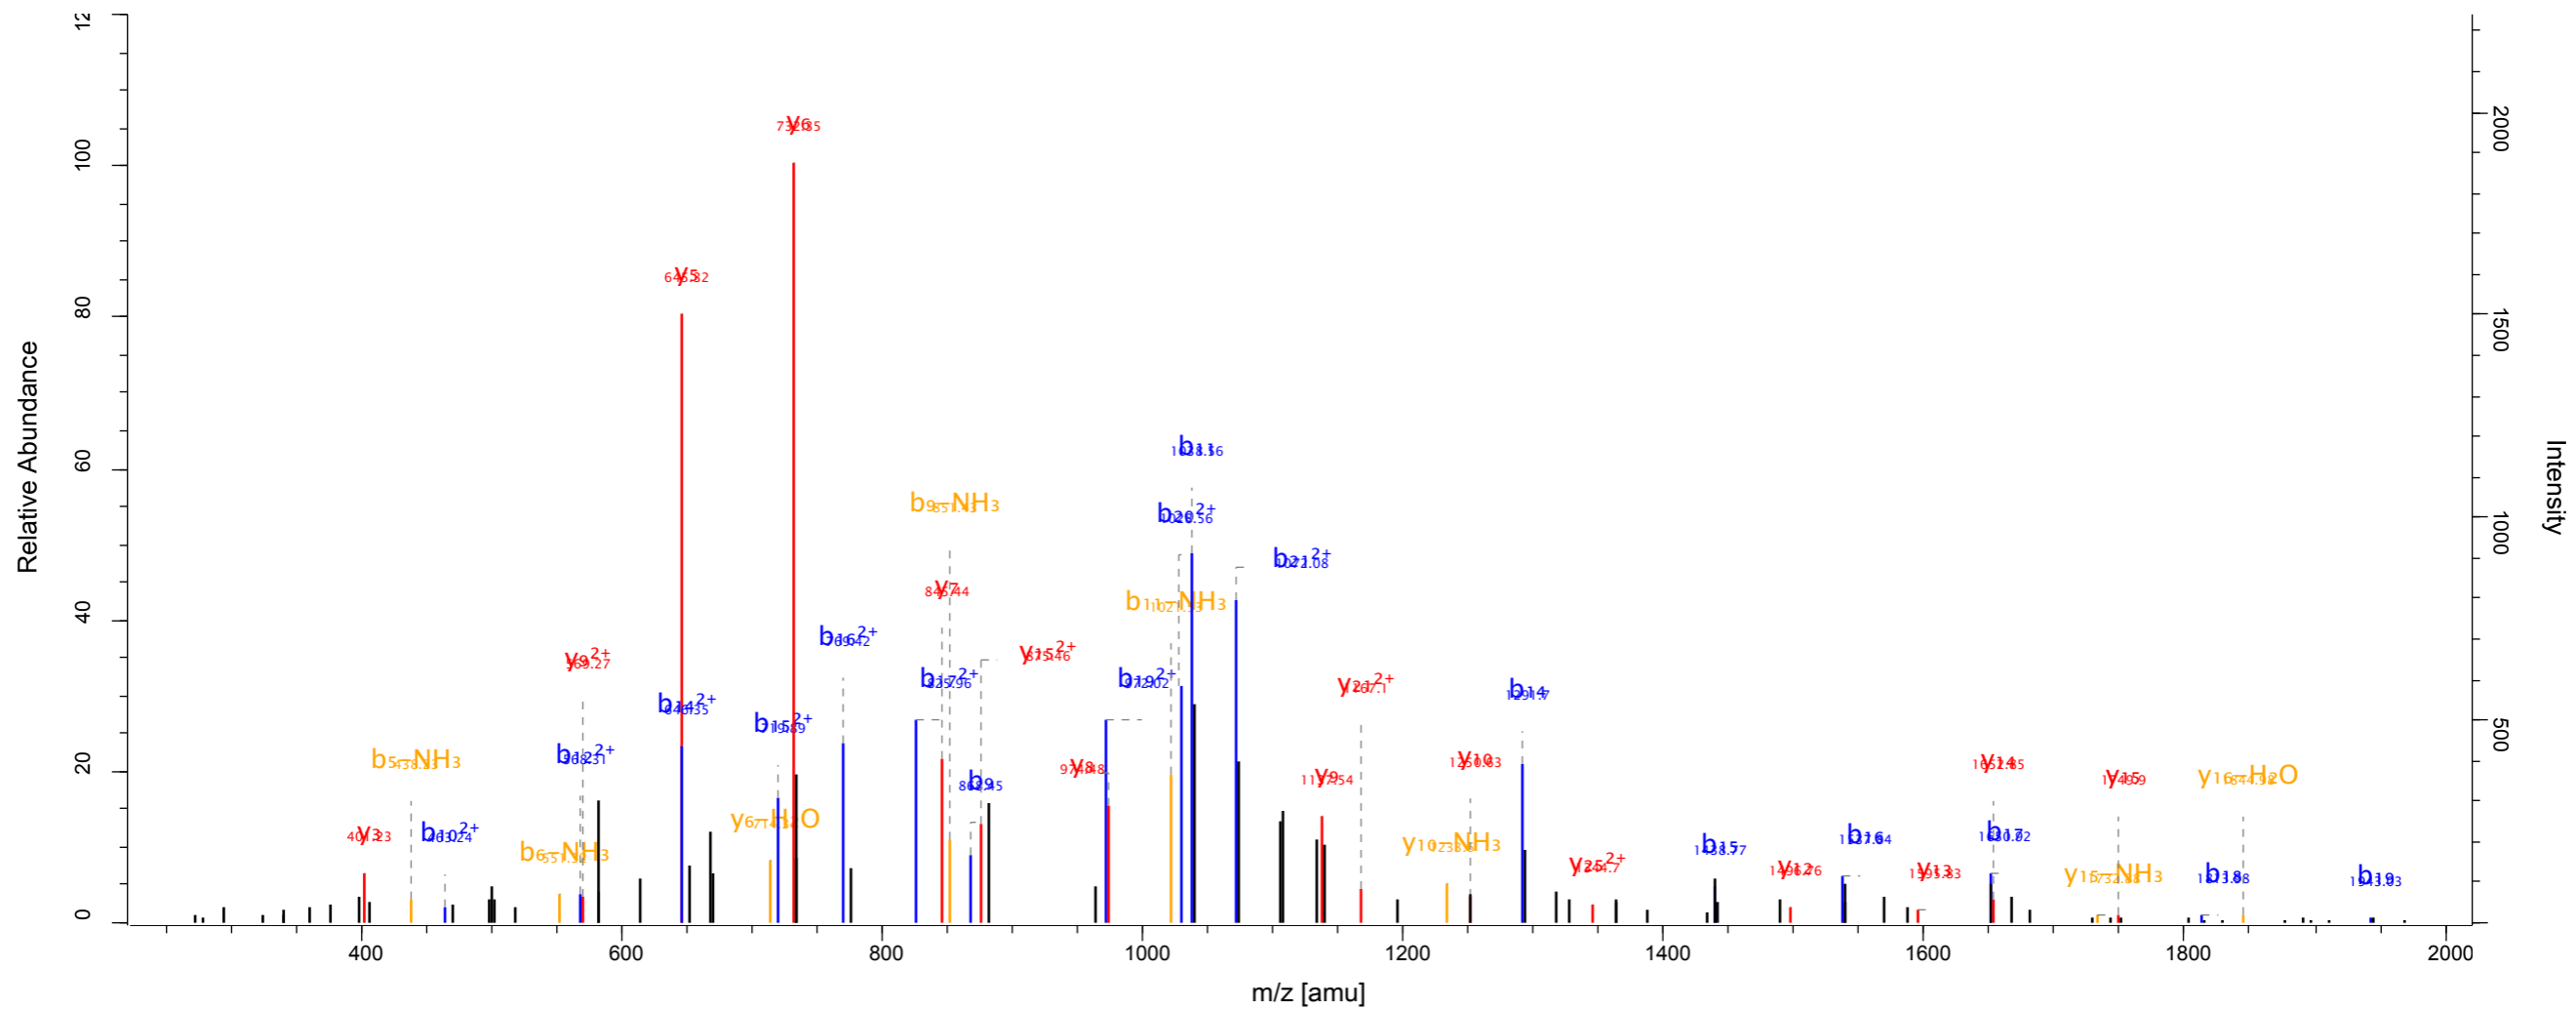

Scan number 5502 Raw file SKaraca\_LMB\_TCE\_Forward\_13\_191011\_rep2  
 Method ITMS; CID Pepti... 135.47

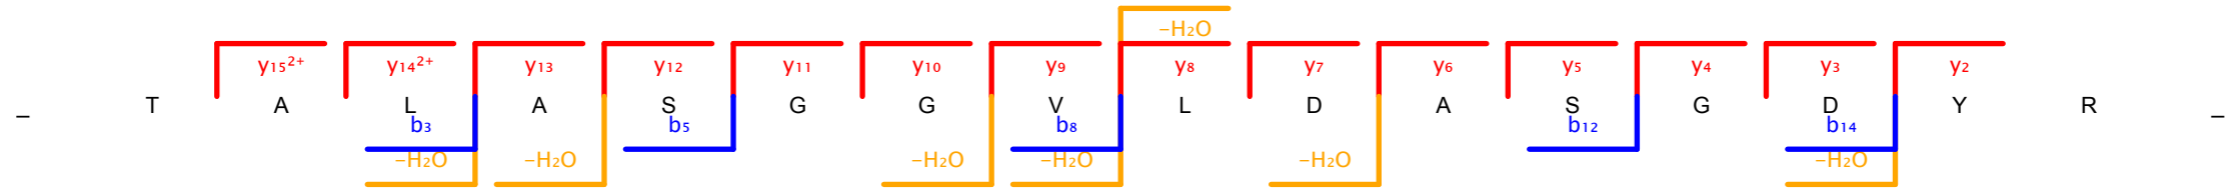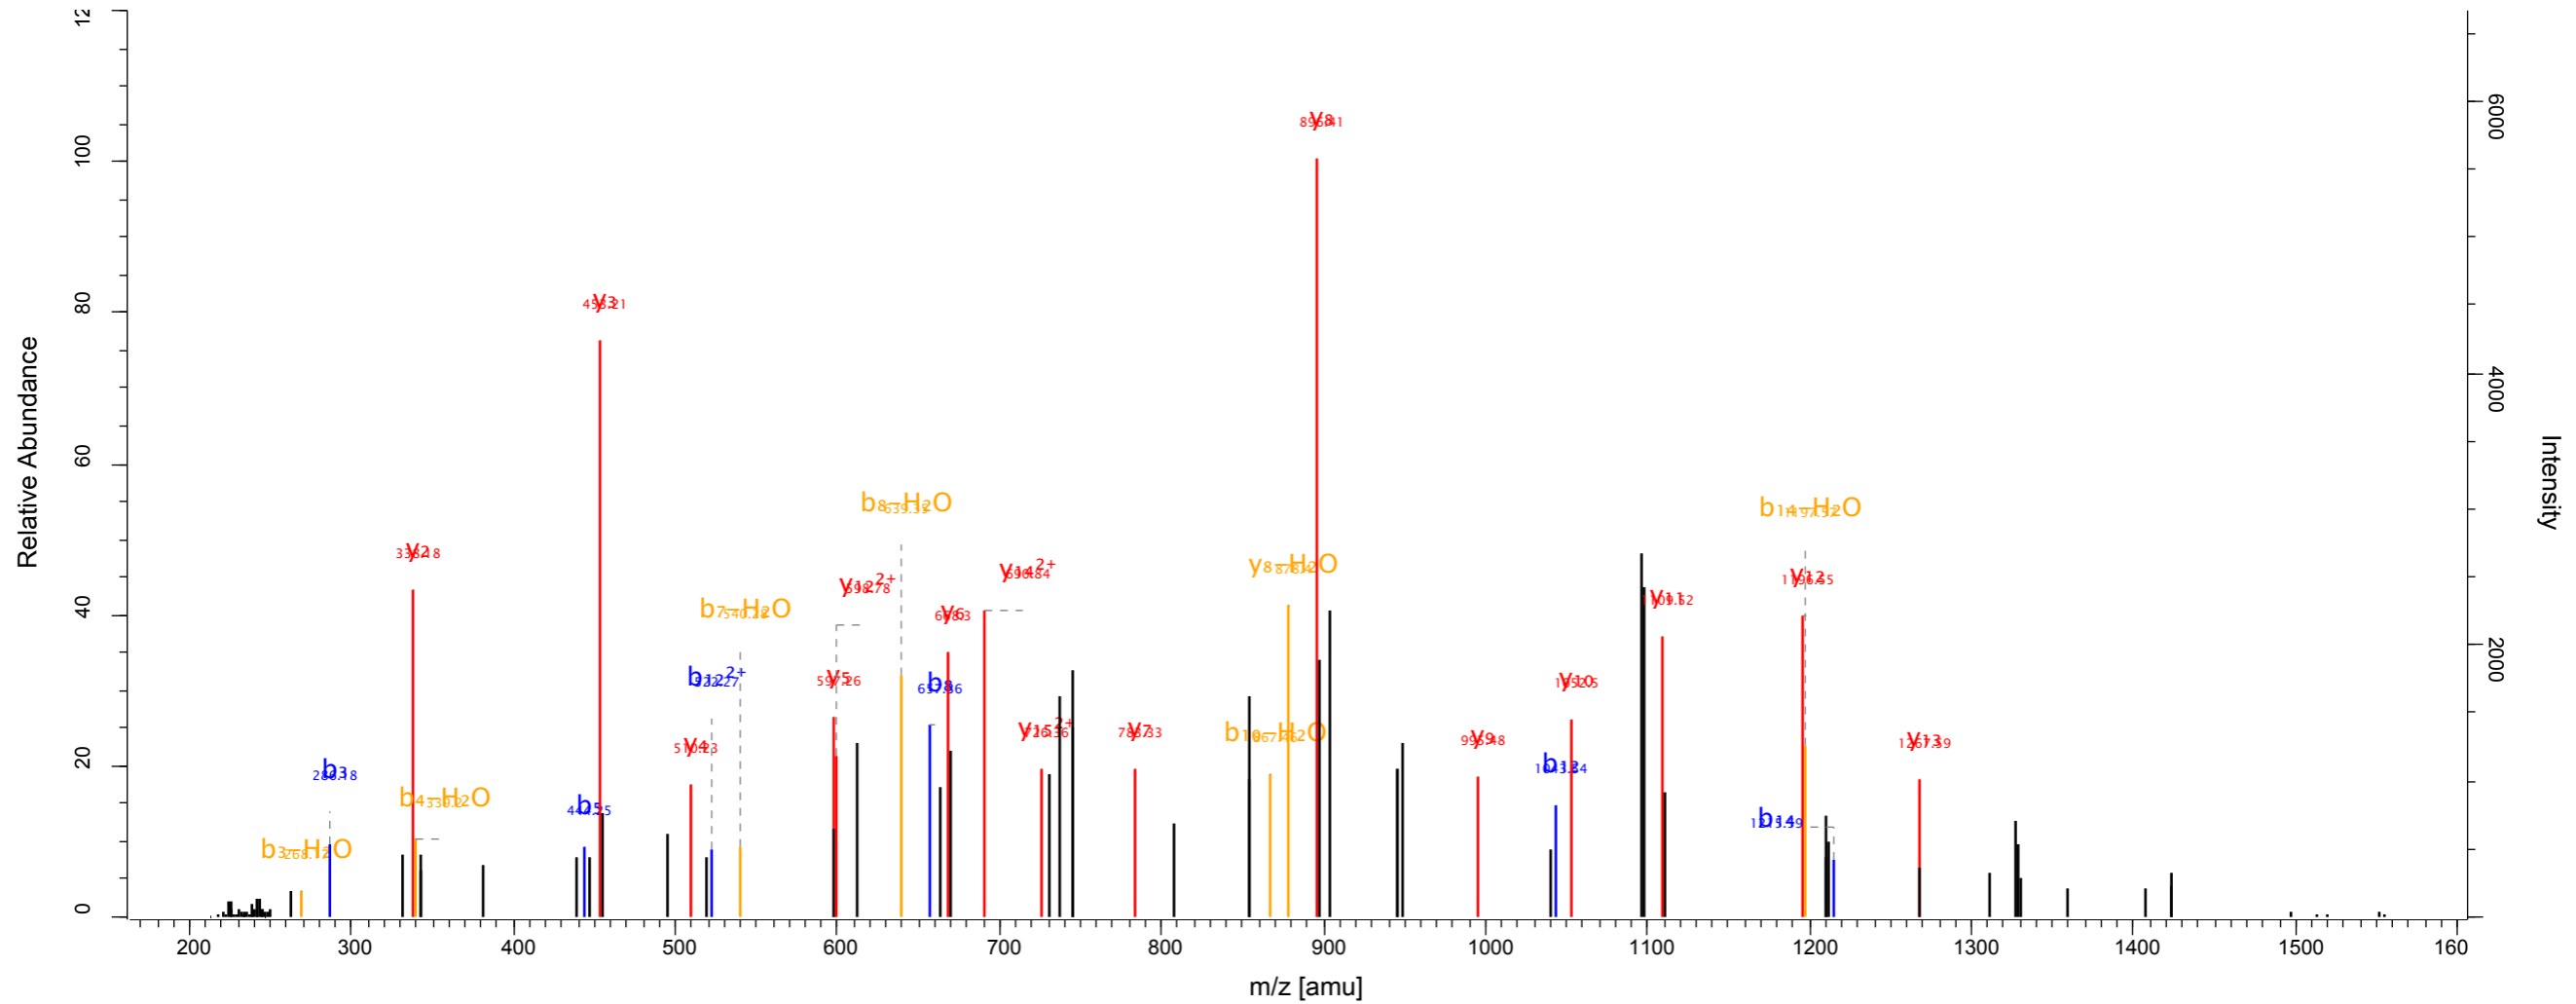

Scan number 975 Raw file SKaraca\_LMB\_TCE\_Forward\_13\_191011\_rep2  
 Method ITMS; CID Pepti... 164.9

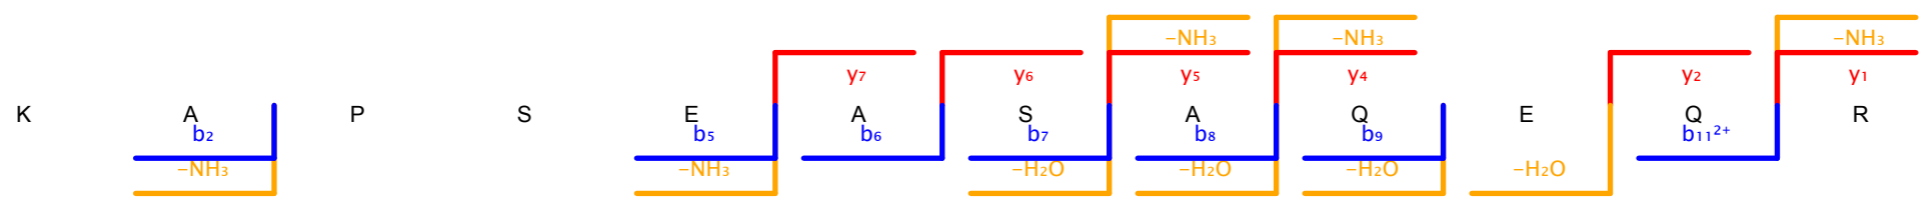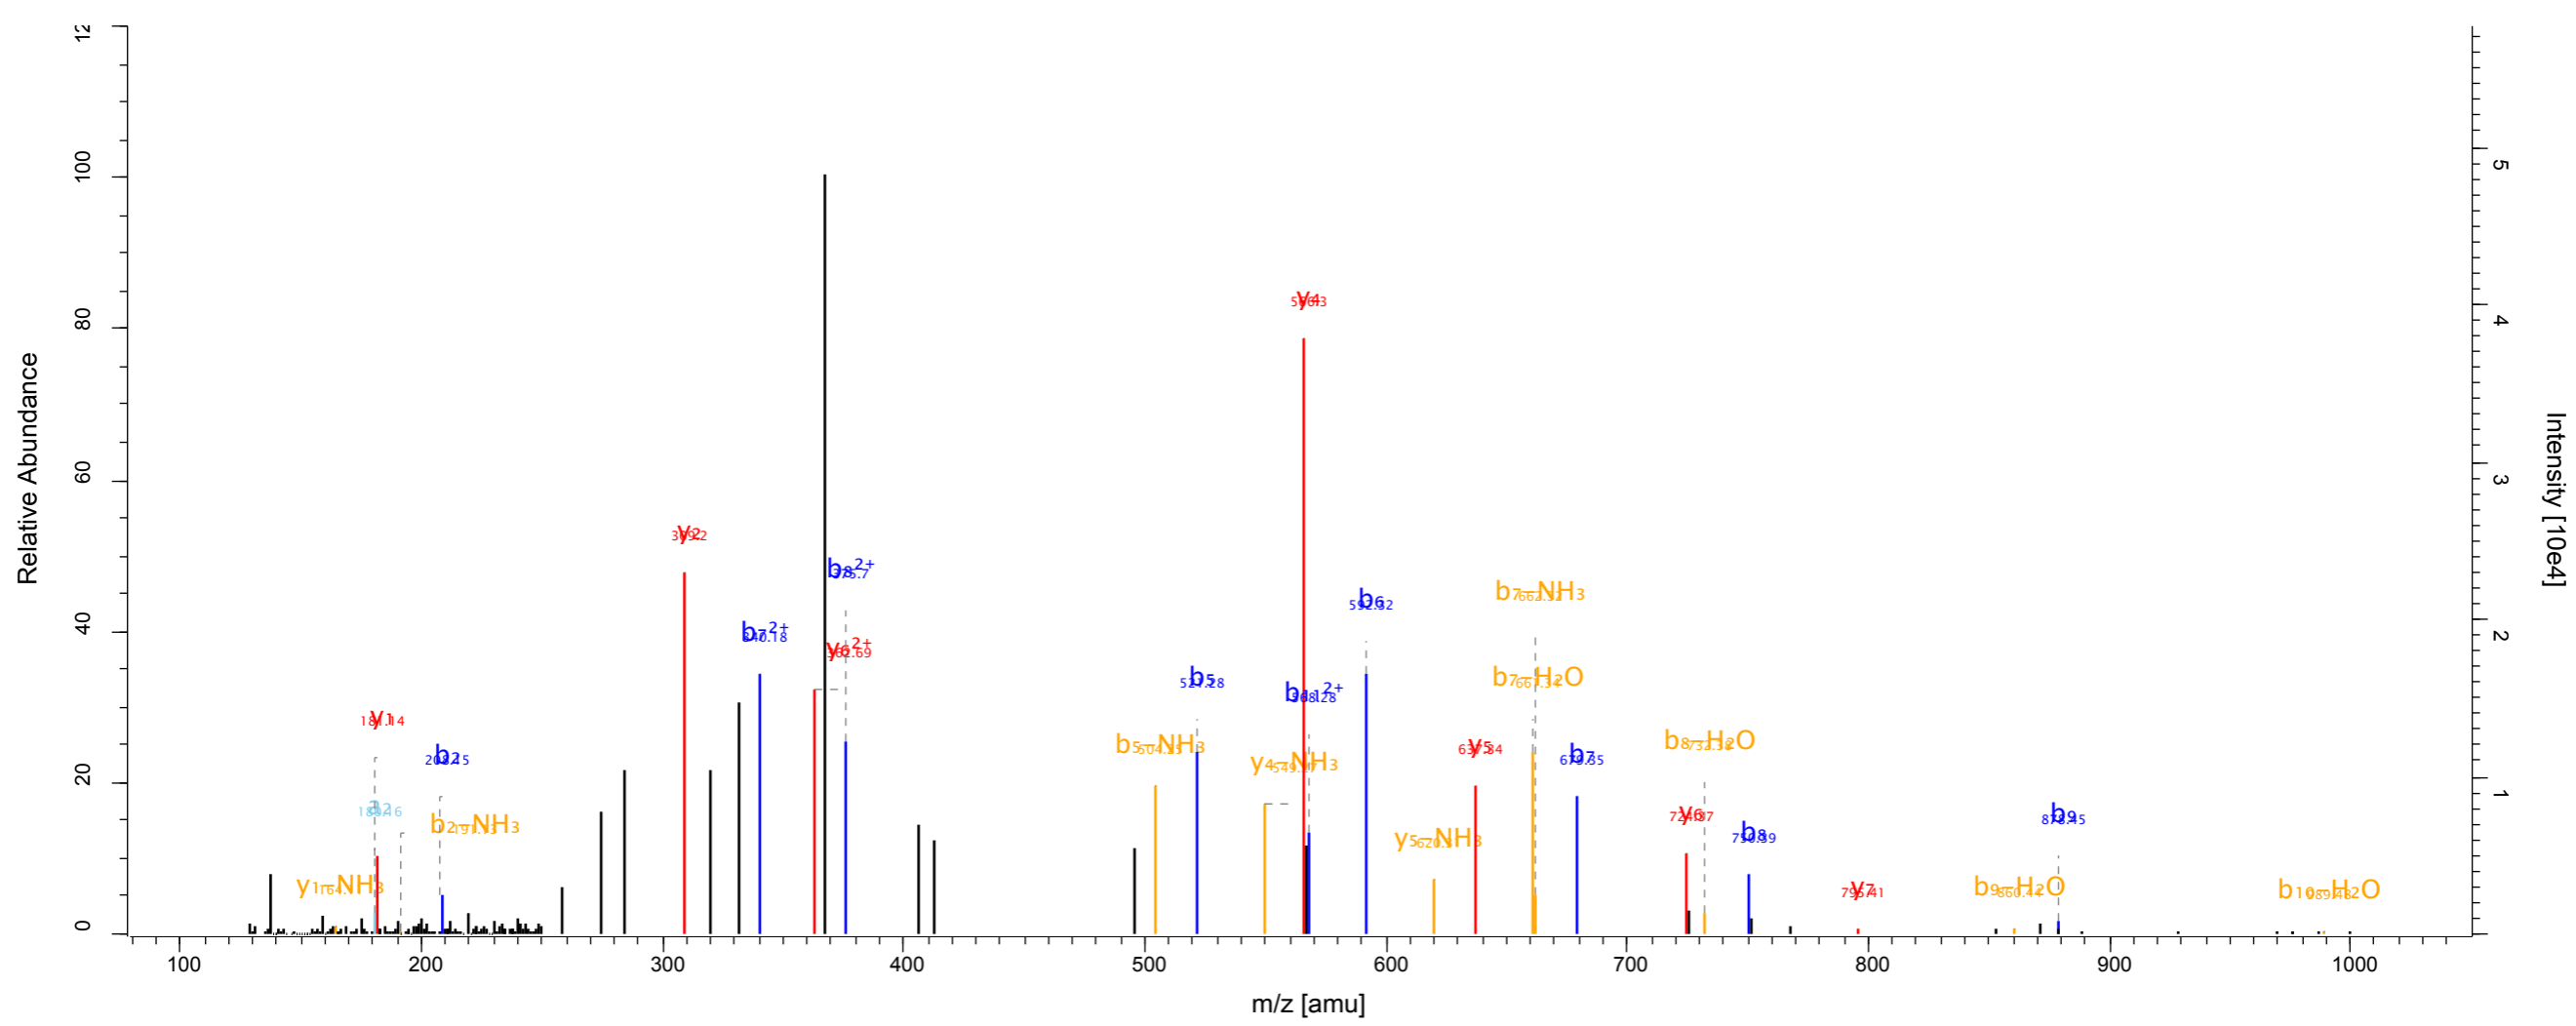

Scan number 9901 Raw file SKaraca\_LMB\_TCE\_Forward\_13\_191011\_rep2  
 Method ITMS; CID Pepti... 252.38

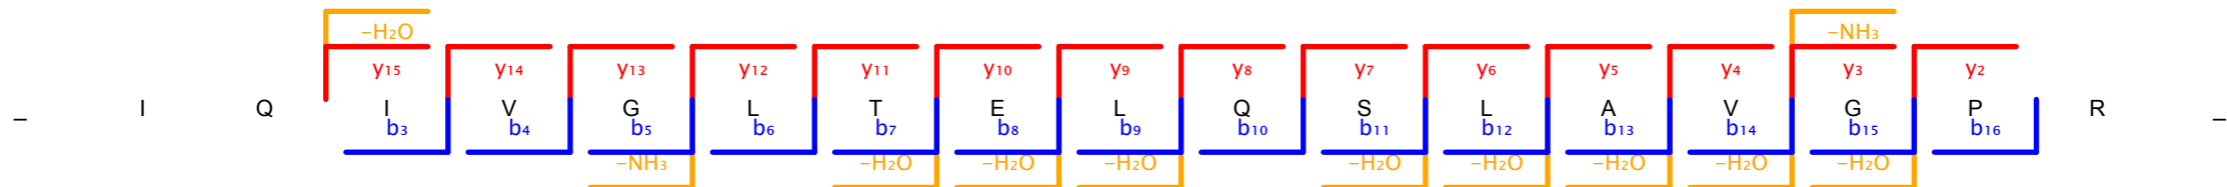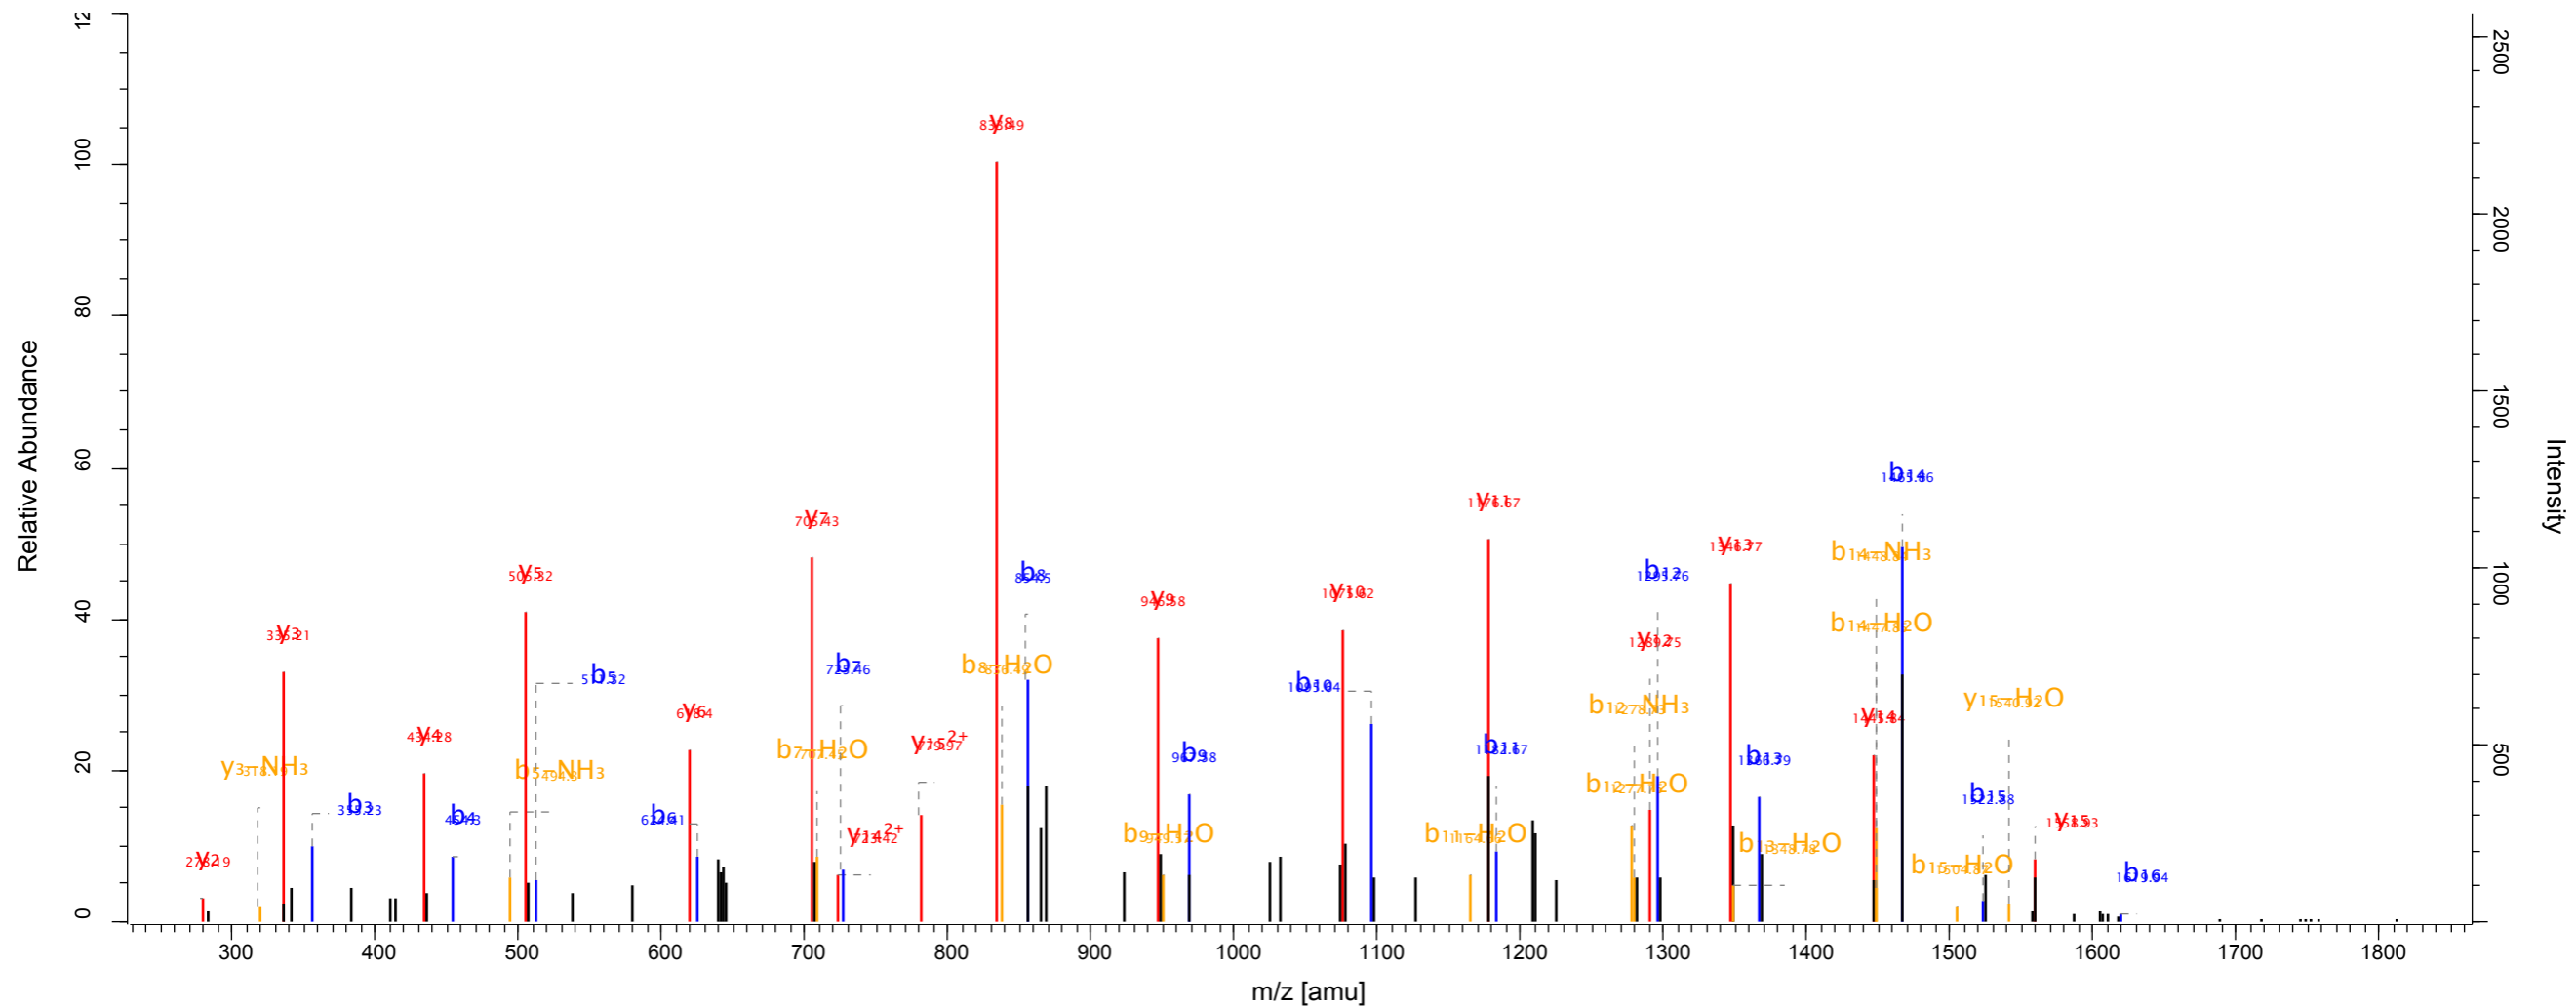

Scan number 4482 Raw file SKaraca\_LMB\_TCE\_Forward\_13\_191011\_rep3  
 Method ITMS; CID Pepti... 151.22

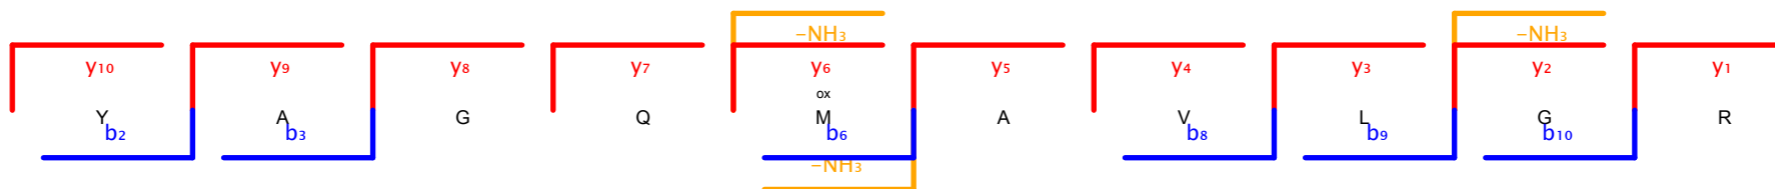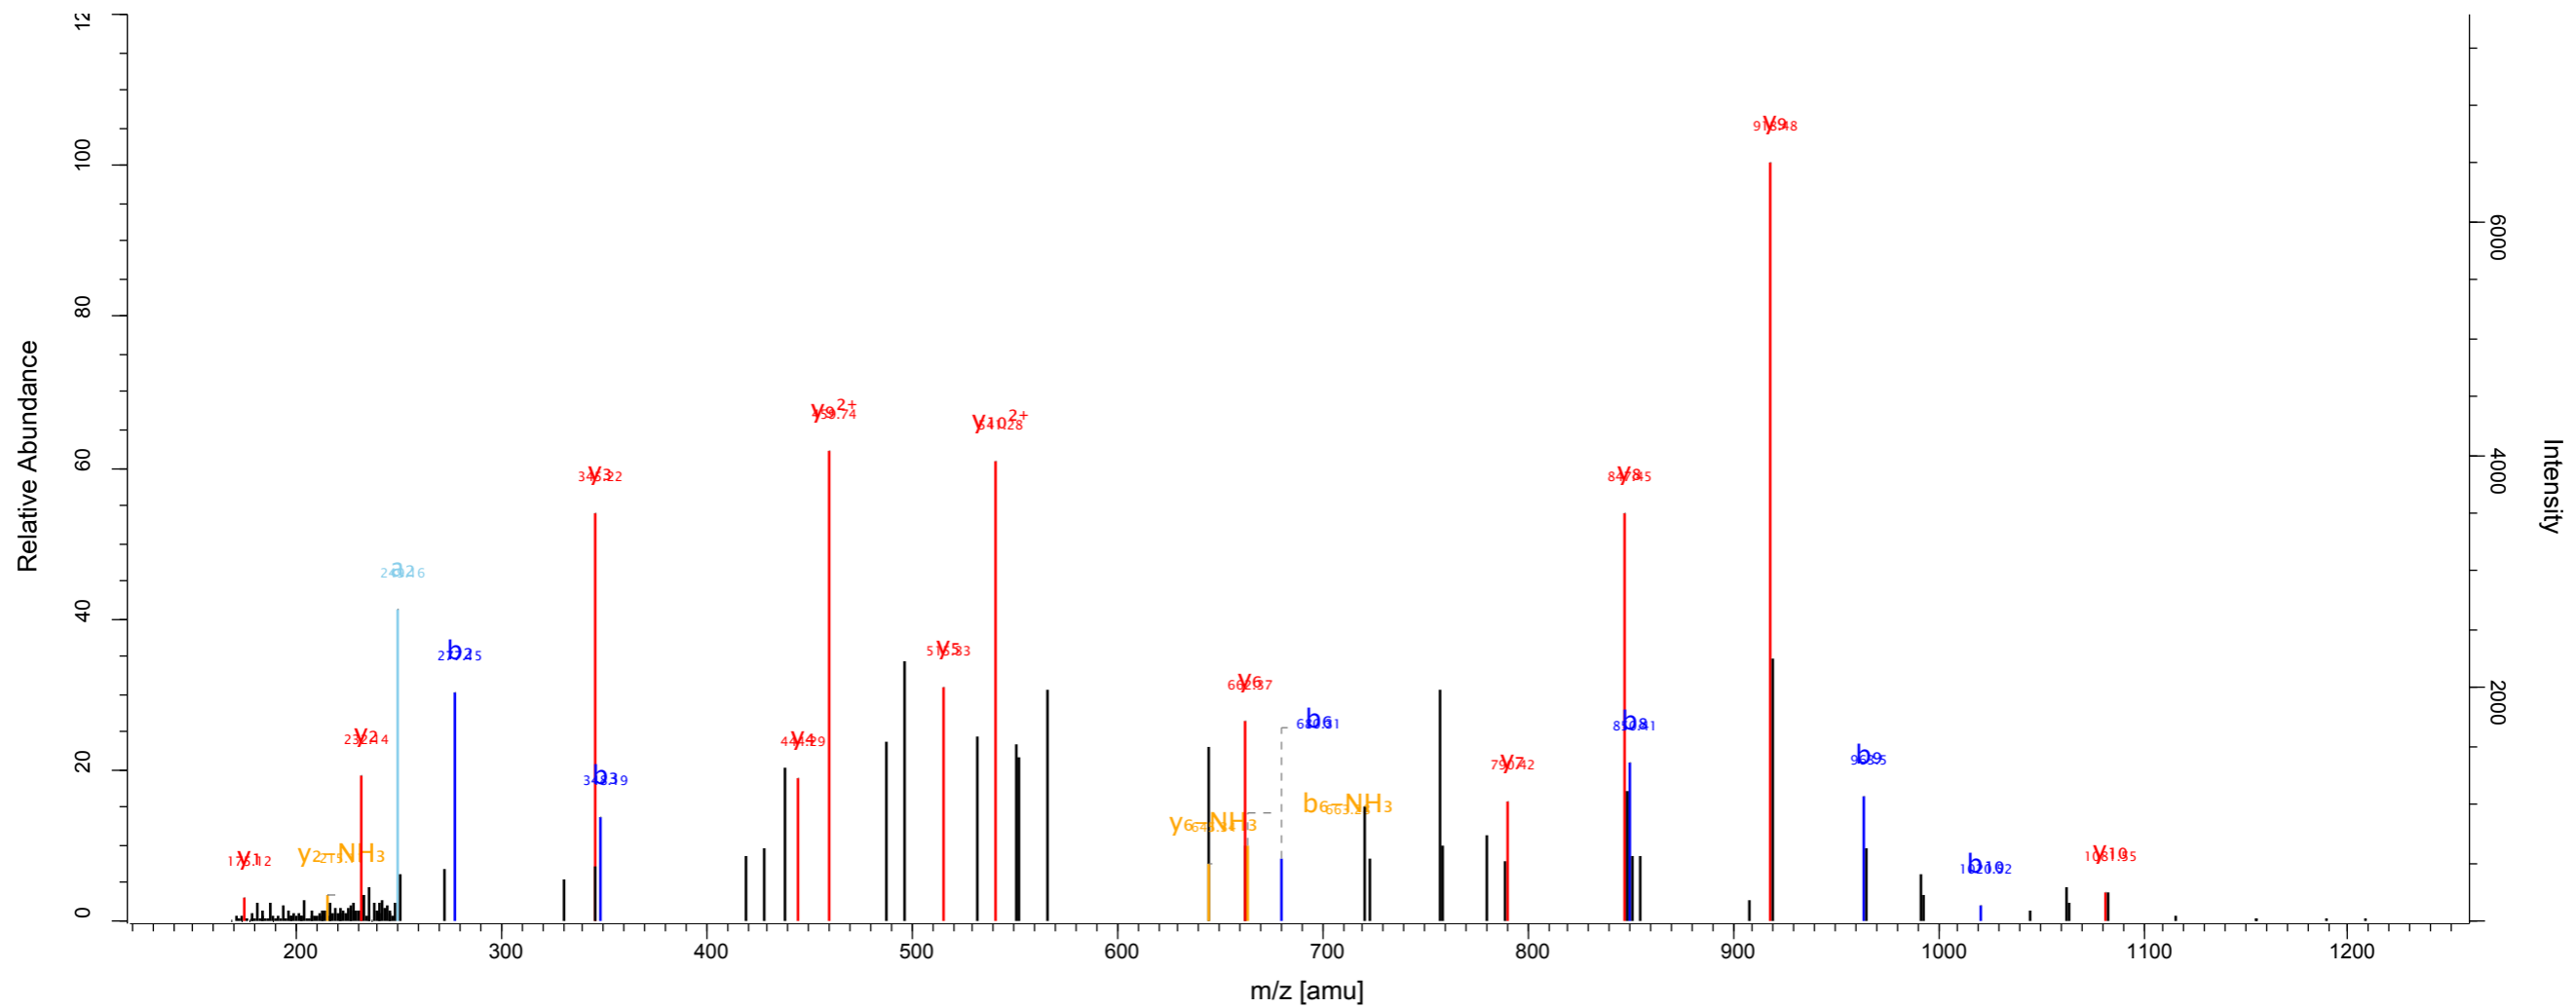

Scan number 4892 Raw file SKaraca\_LMB\_TCE\_Forward\_13\_191011\_rep3  
 Method ITMS; CID Pepti... 122.94

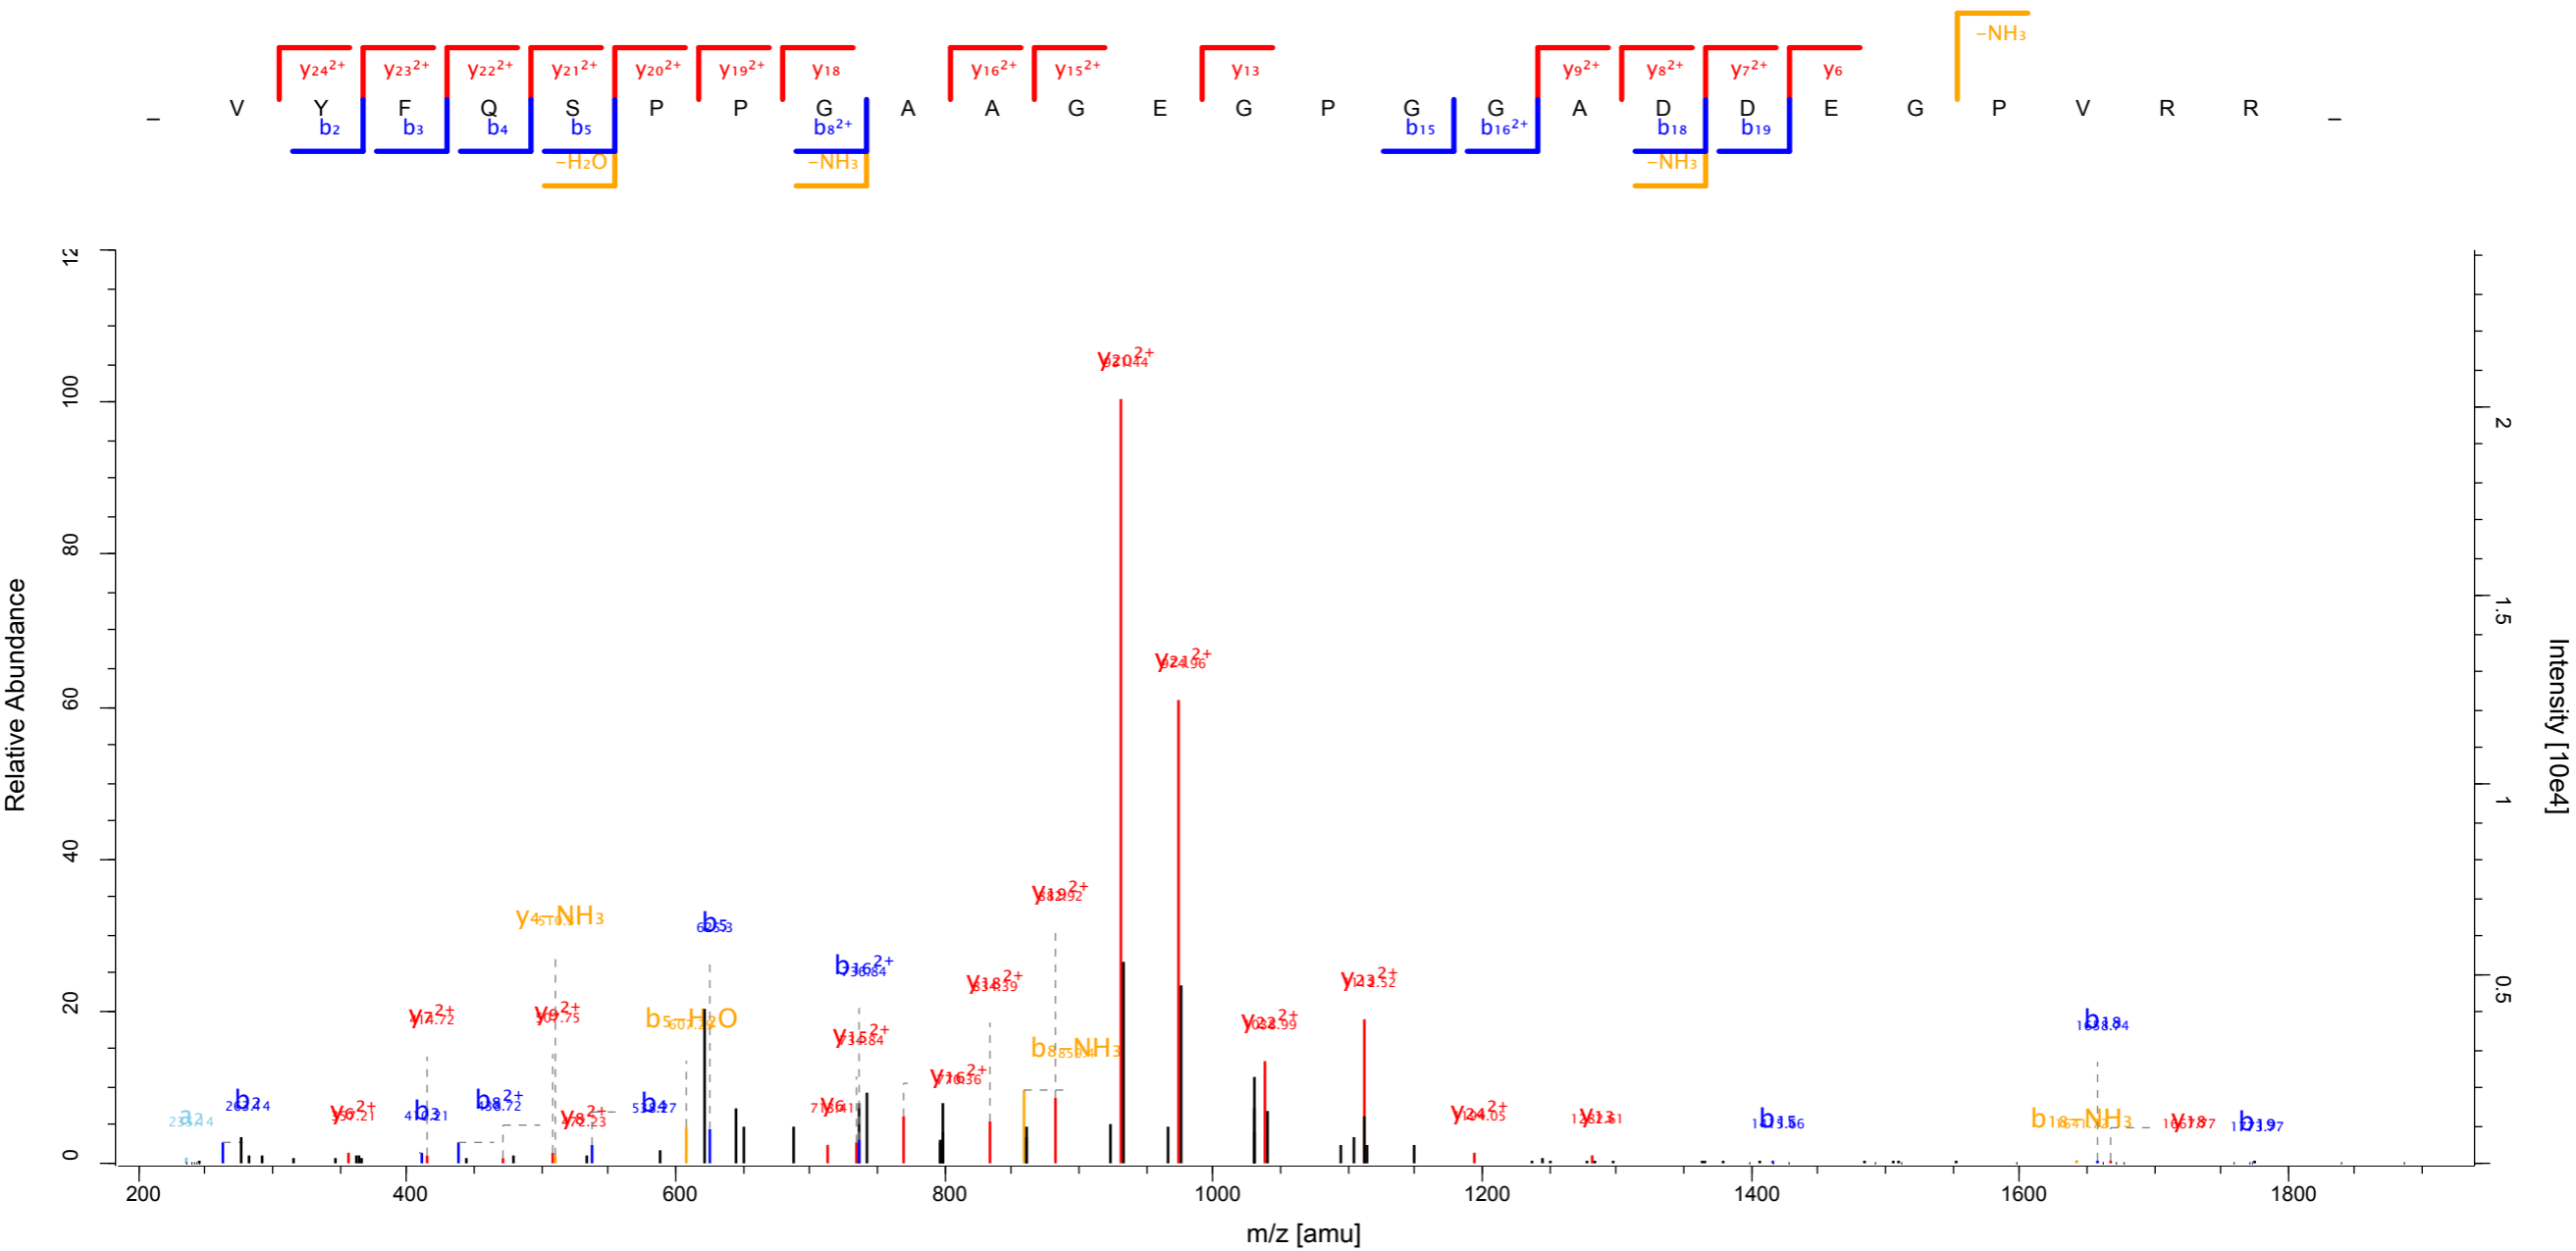

Scan number 1345 Raw file SKaraca\_LMB\_TCE\_Forward\_14\_191011\_rep2  
 Method ITMS; CID Pepti... 145

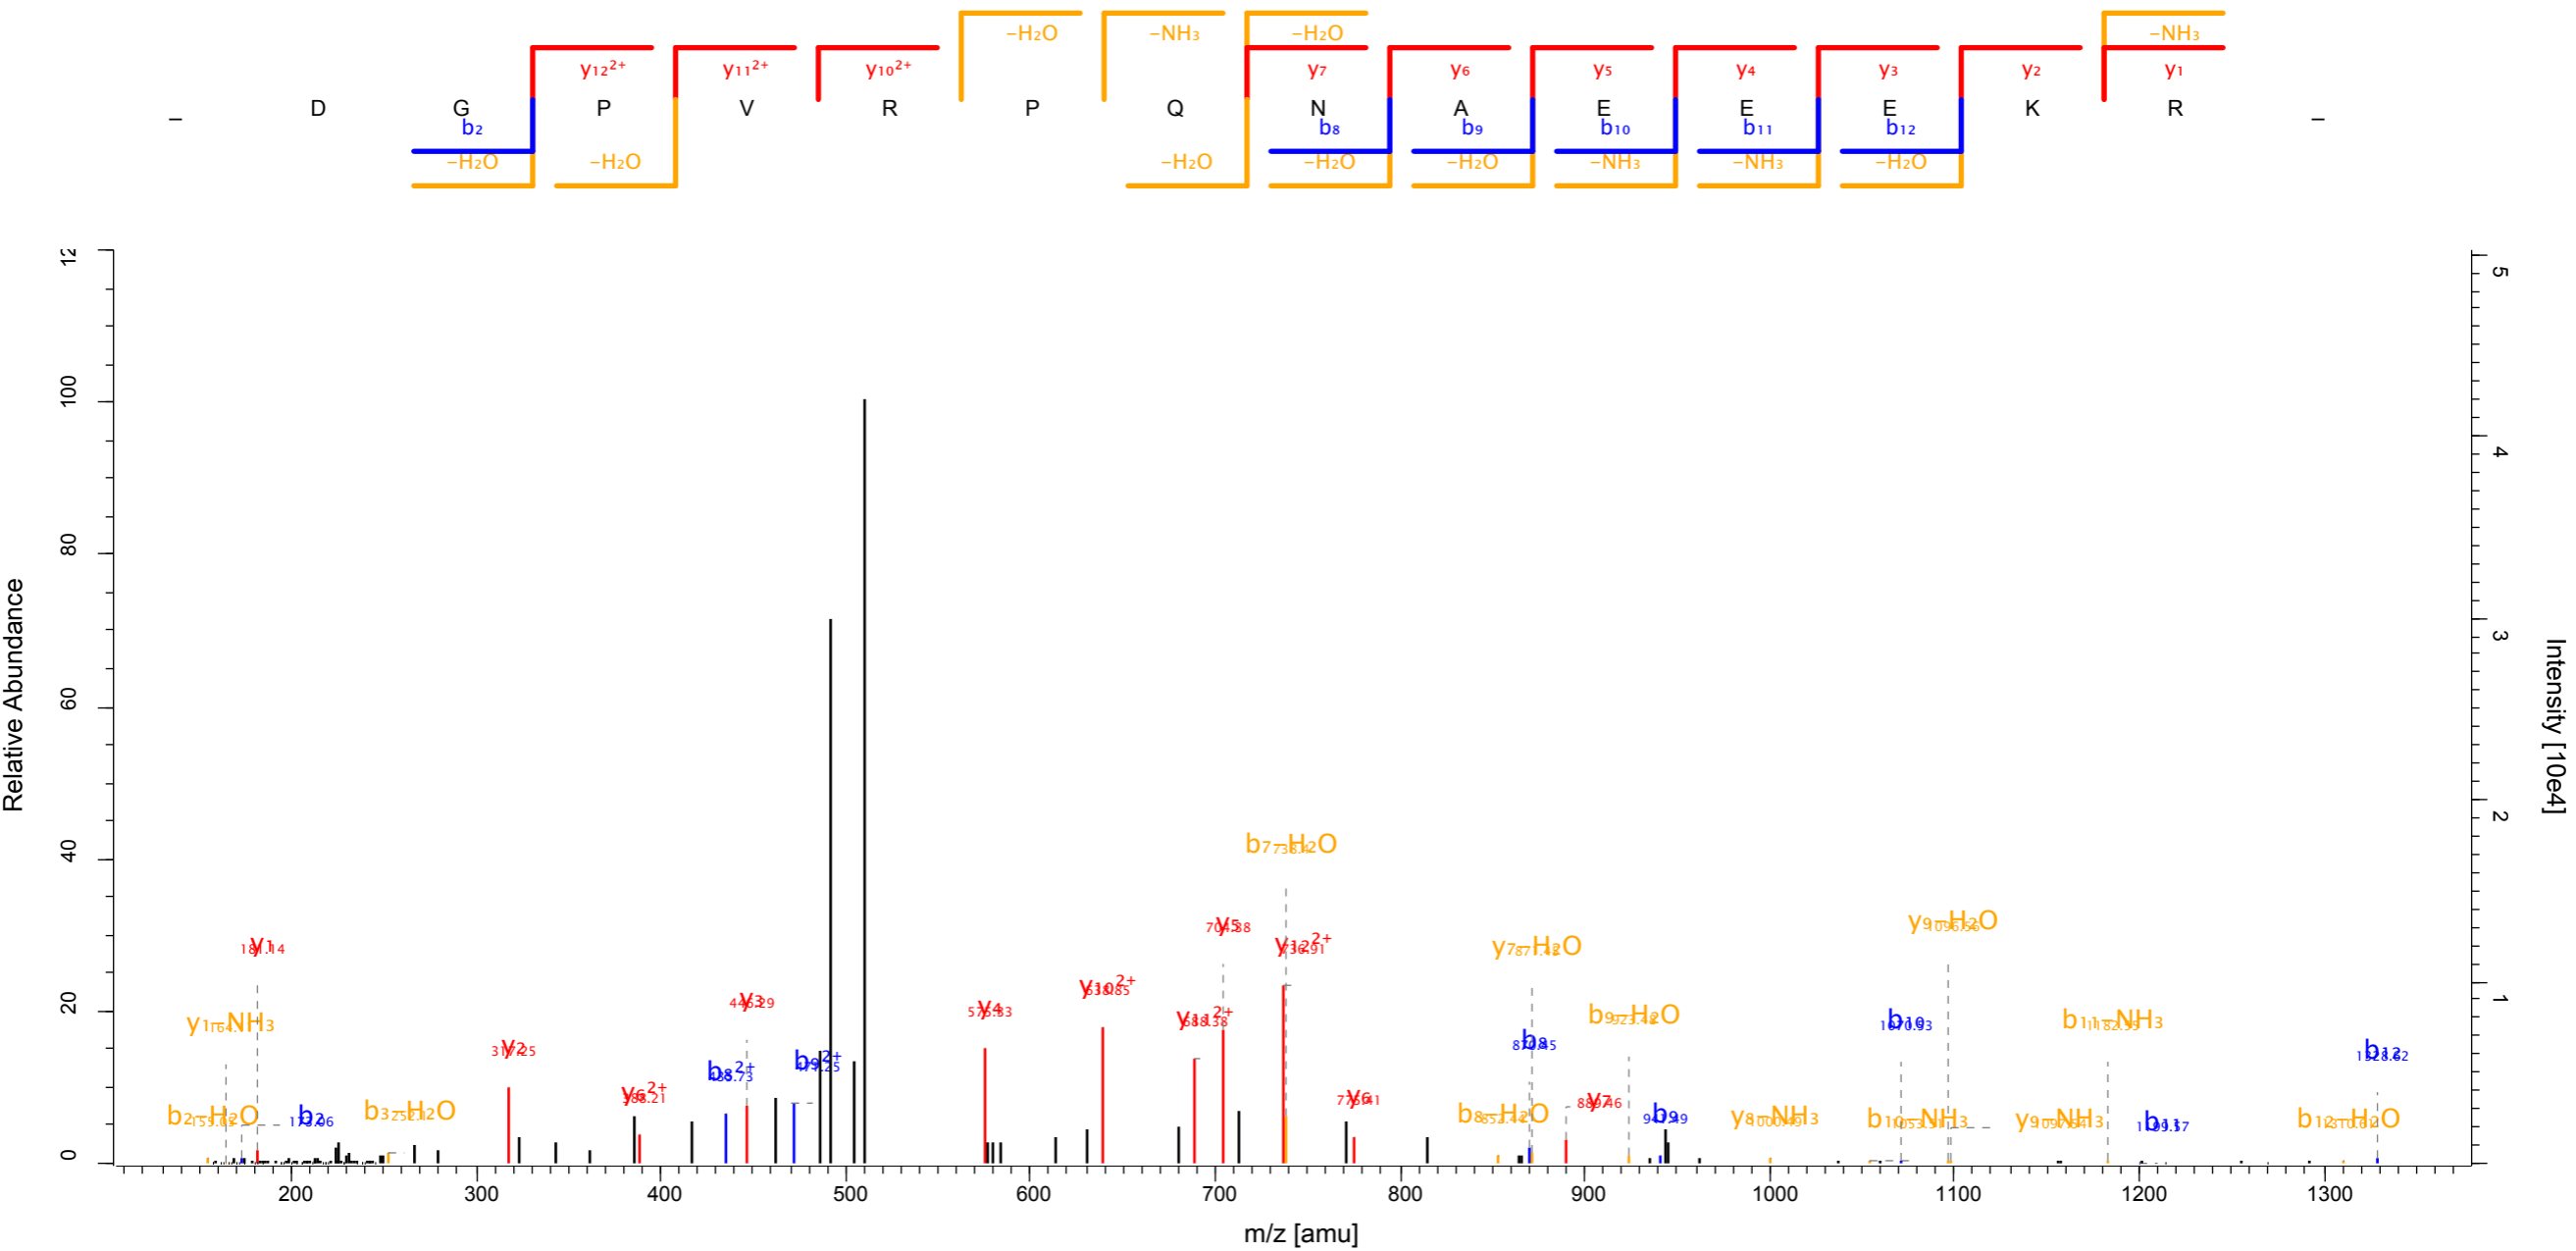



Scan number 3846 Raw file SKaraca\_LMB\_TCE\_Forward\_14\_191011\_rep2  
 Method ITMS; CID Pepti... 137.62

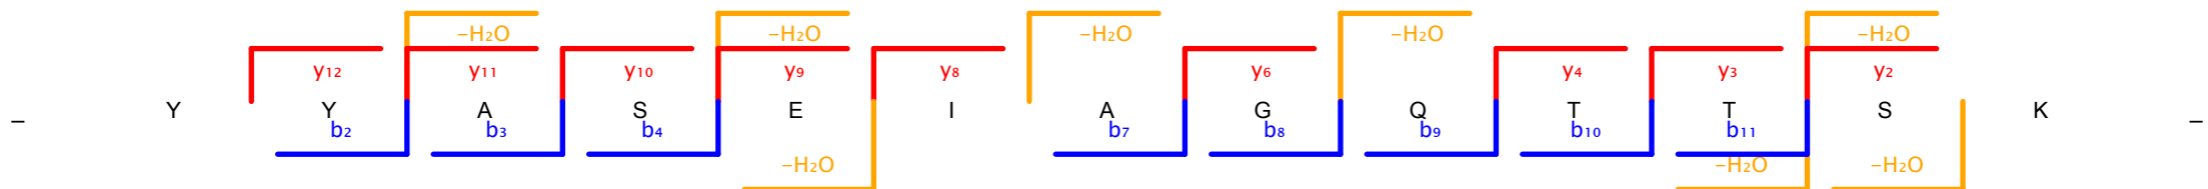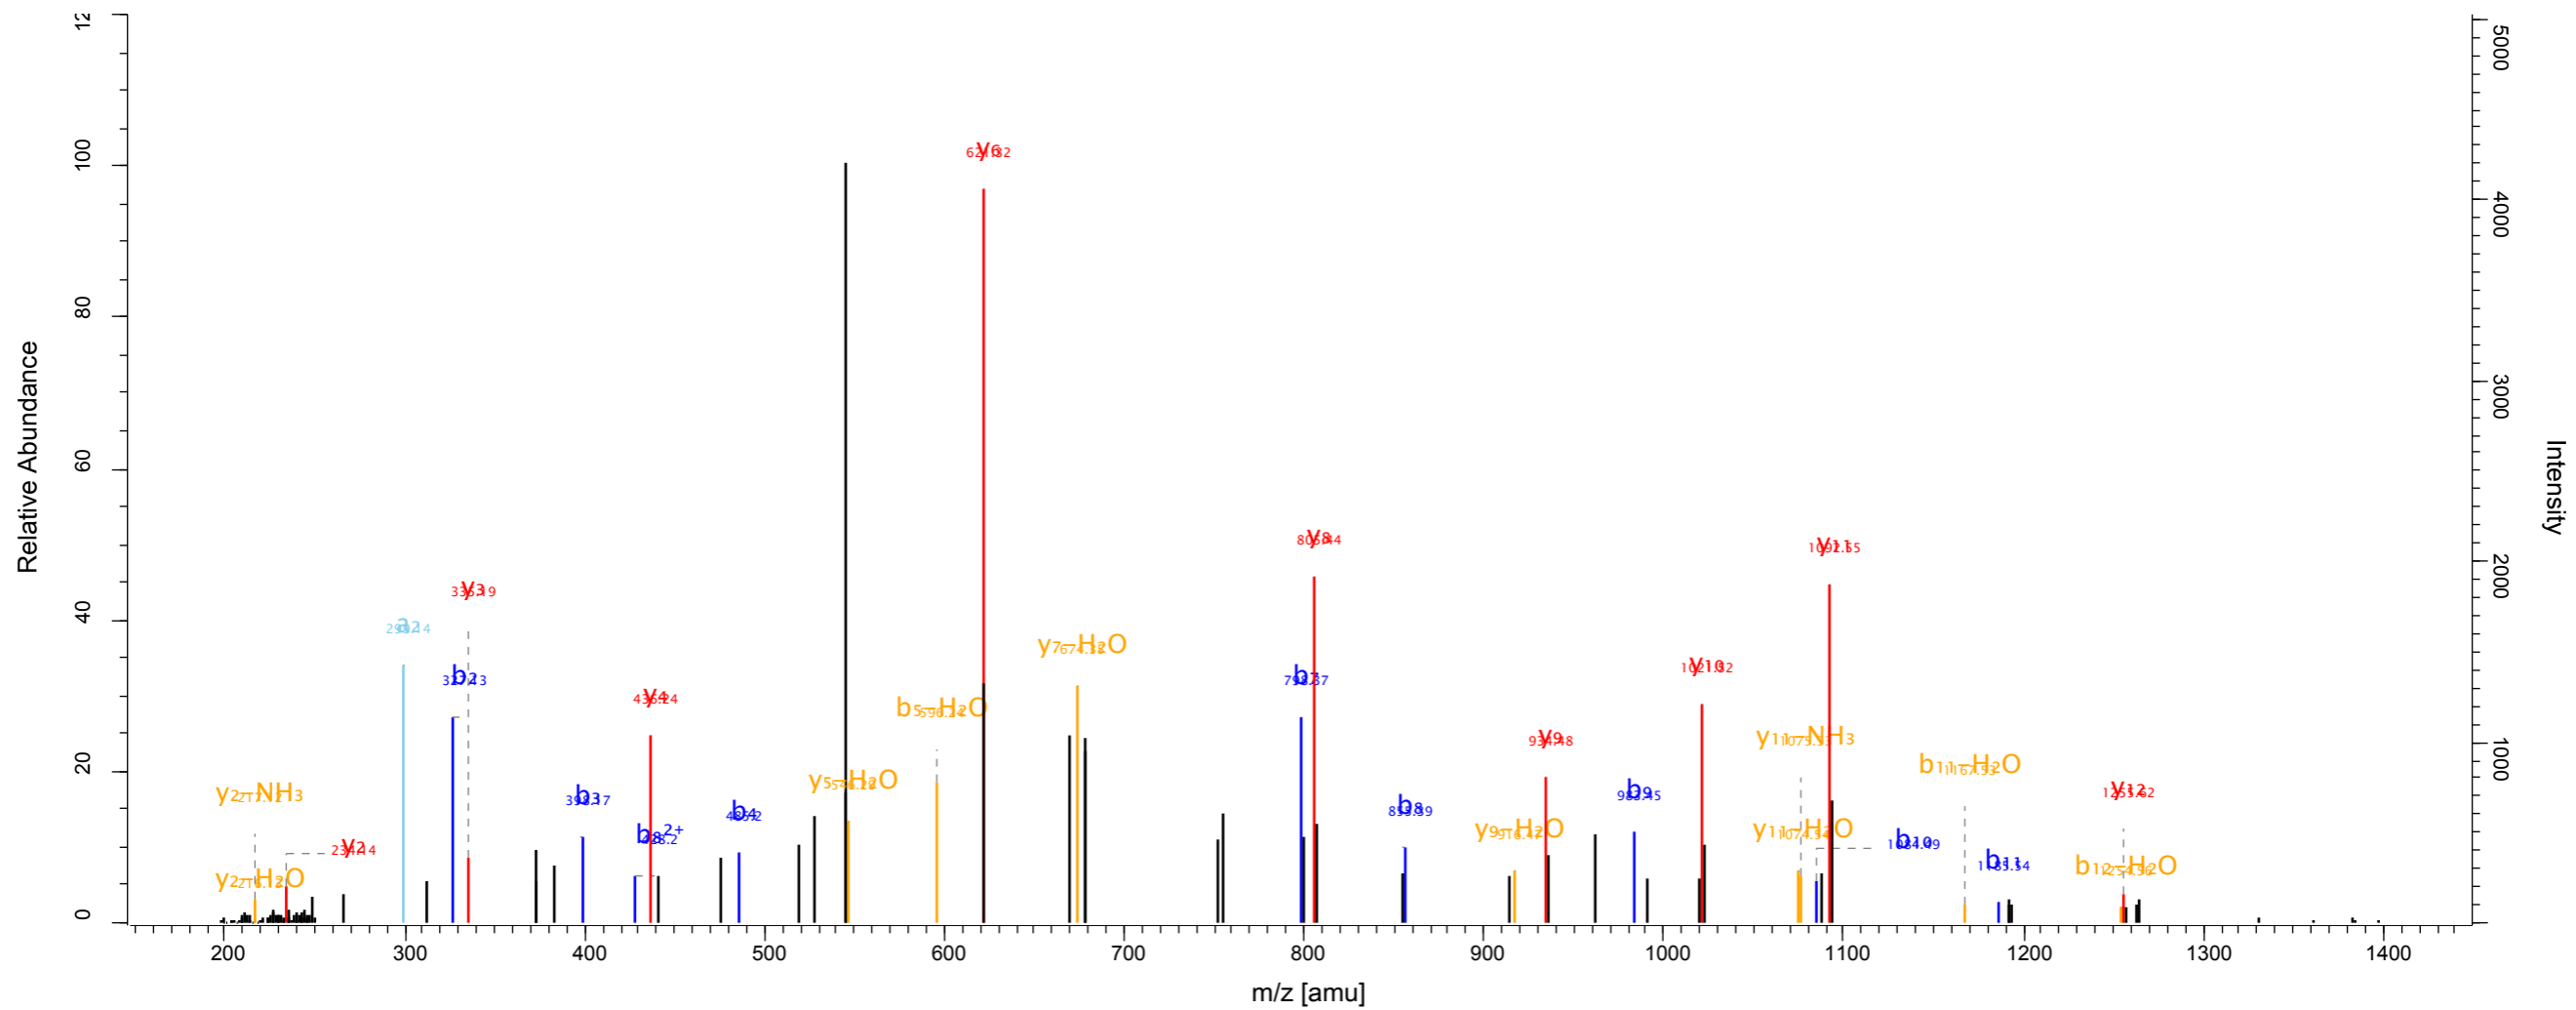

Scan number 6941 Raw file SKaraca\_LMB\_TCE\_Forward\_14\_191011\_rep2  
 Method ITMS; CID Pepti... 93.24

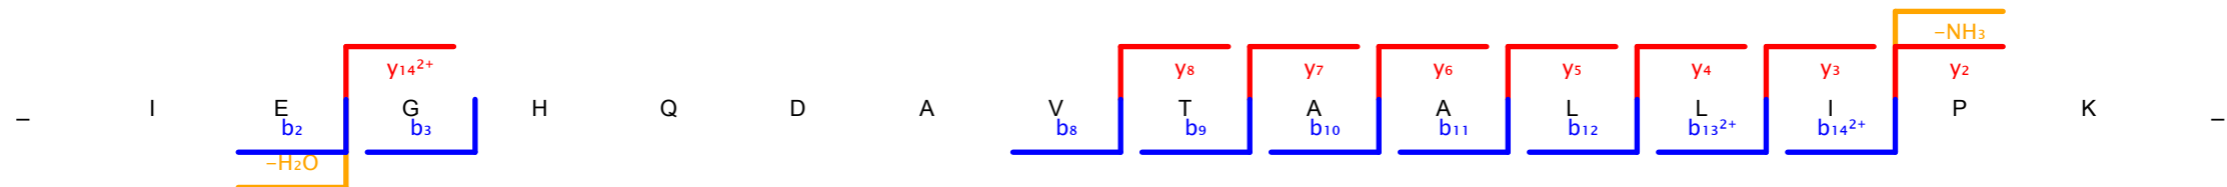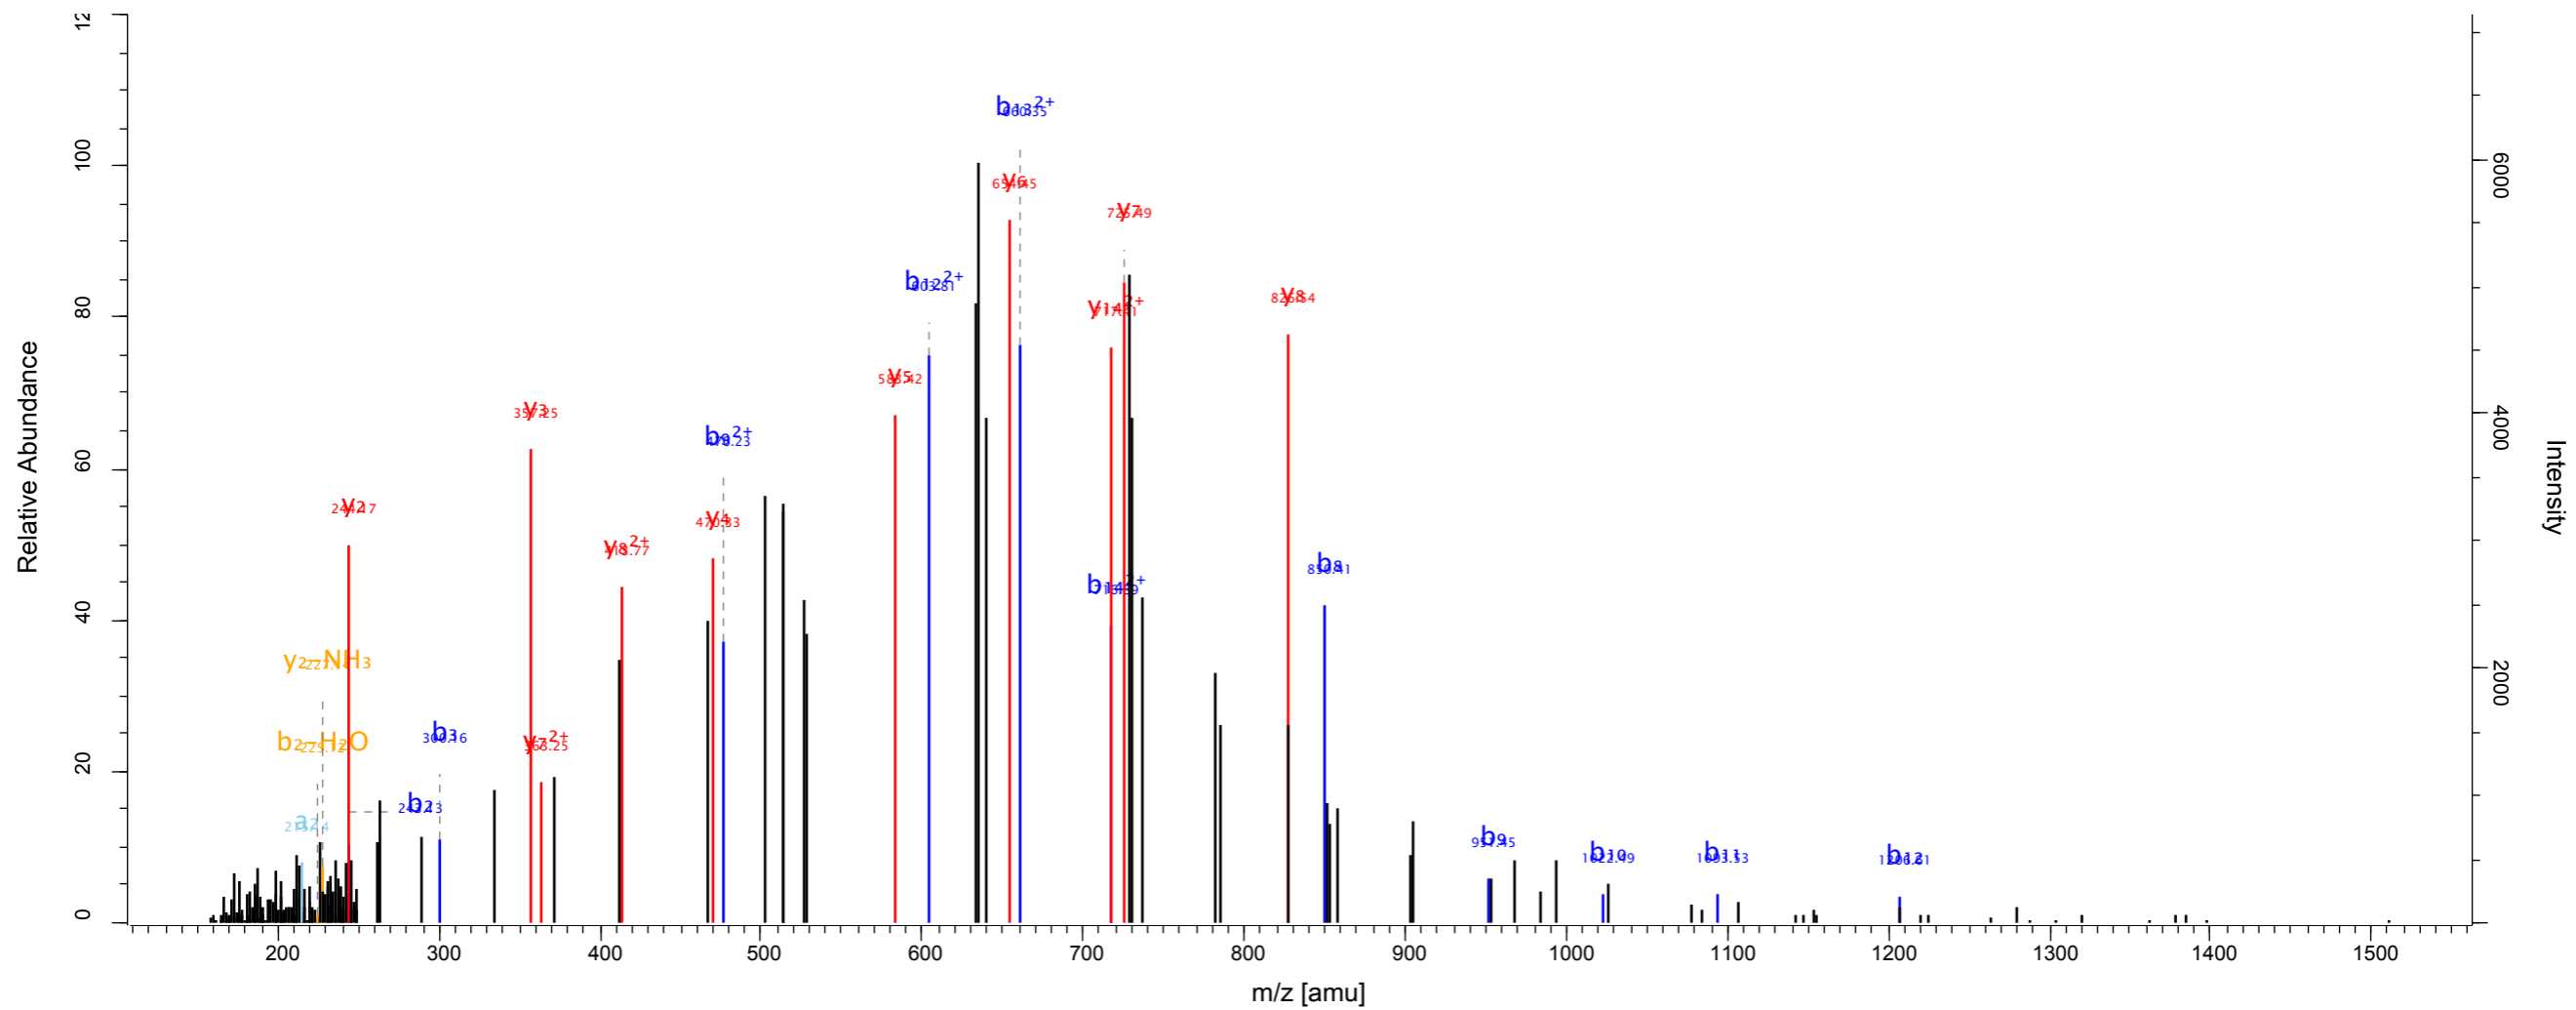

|             |           |          |                                        |
|-------------|-----------|----------|----------------------------------------|
| Scan number | 7907      | Raw file | SKaraca_LMB_TCE_Forward_14_191011_rep2 |
| Method      | ITMS; CID | Pepti... | 93.91                                  |

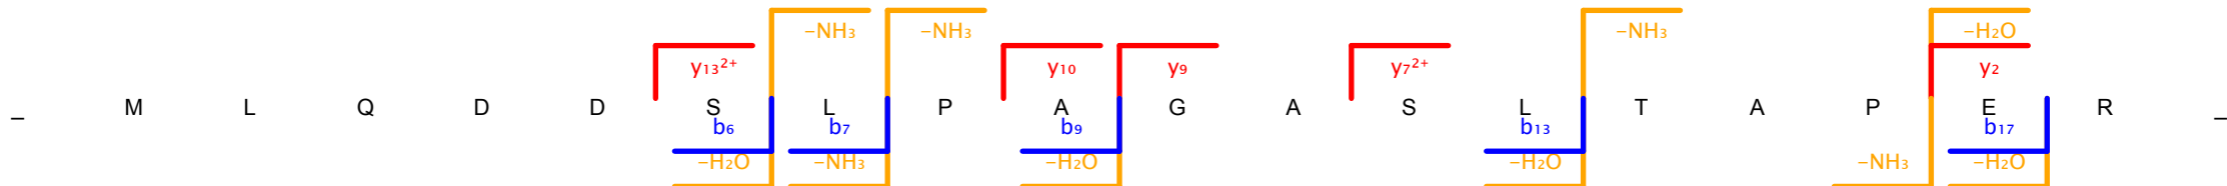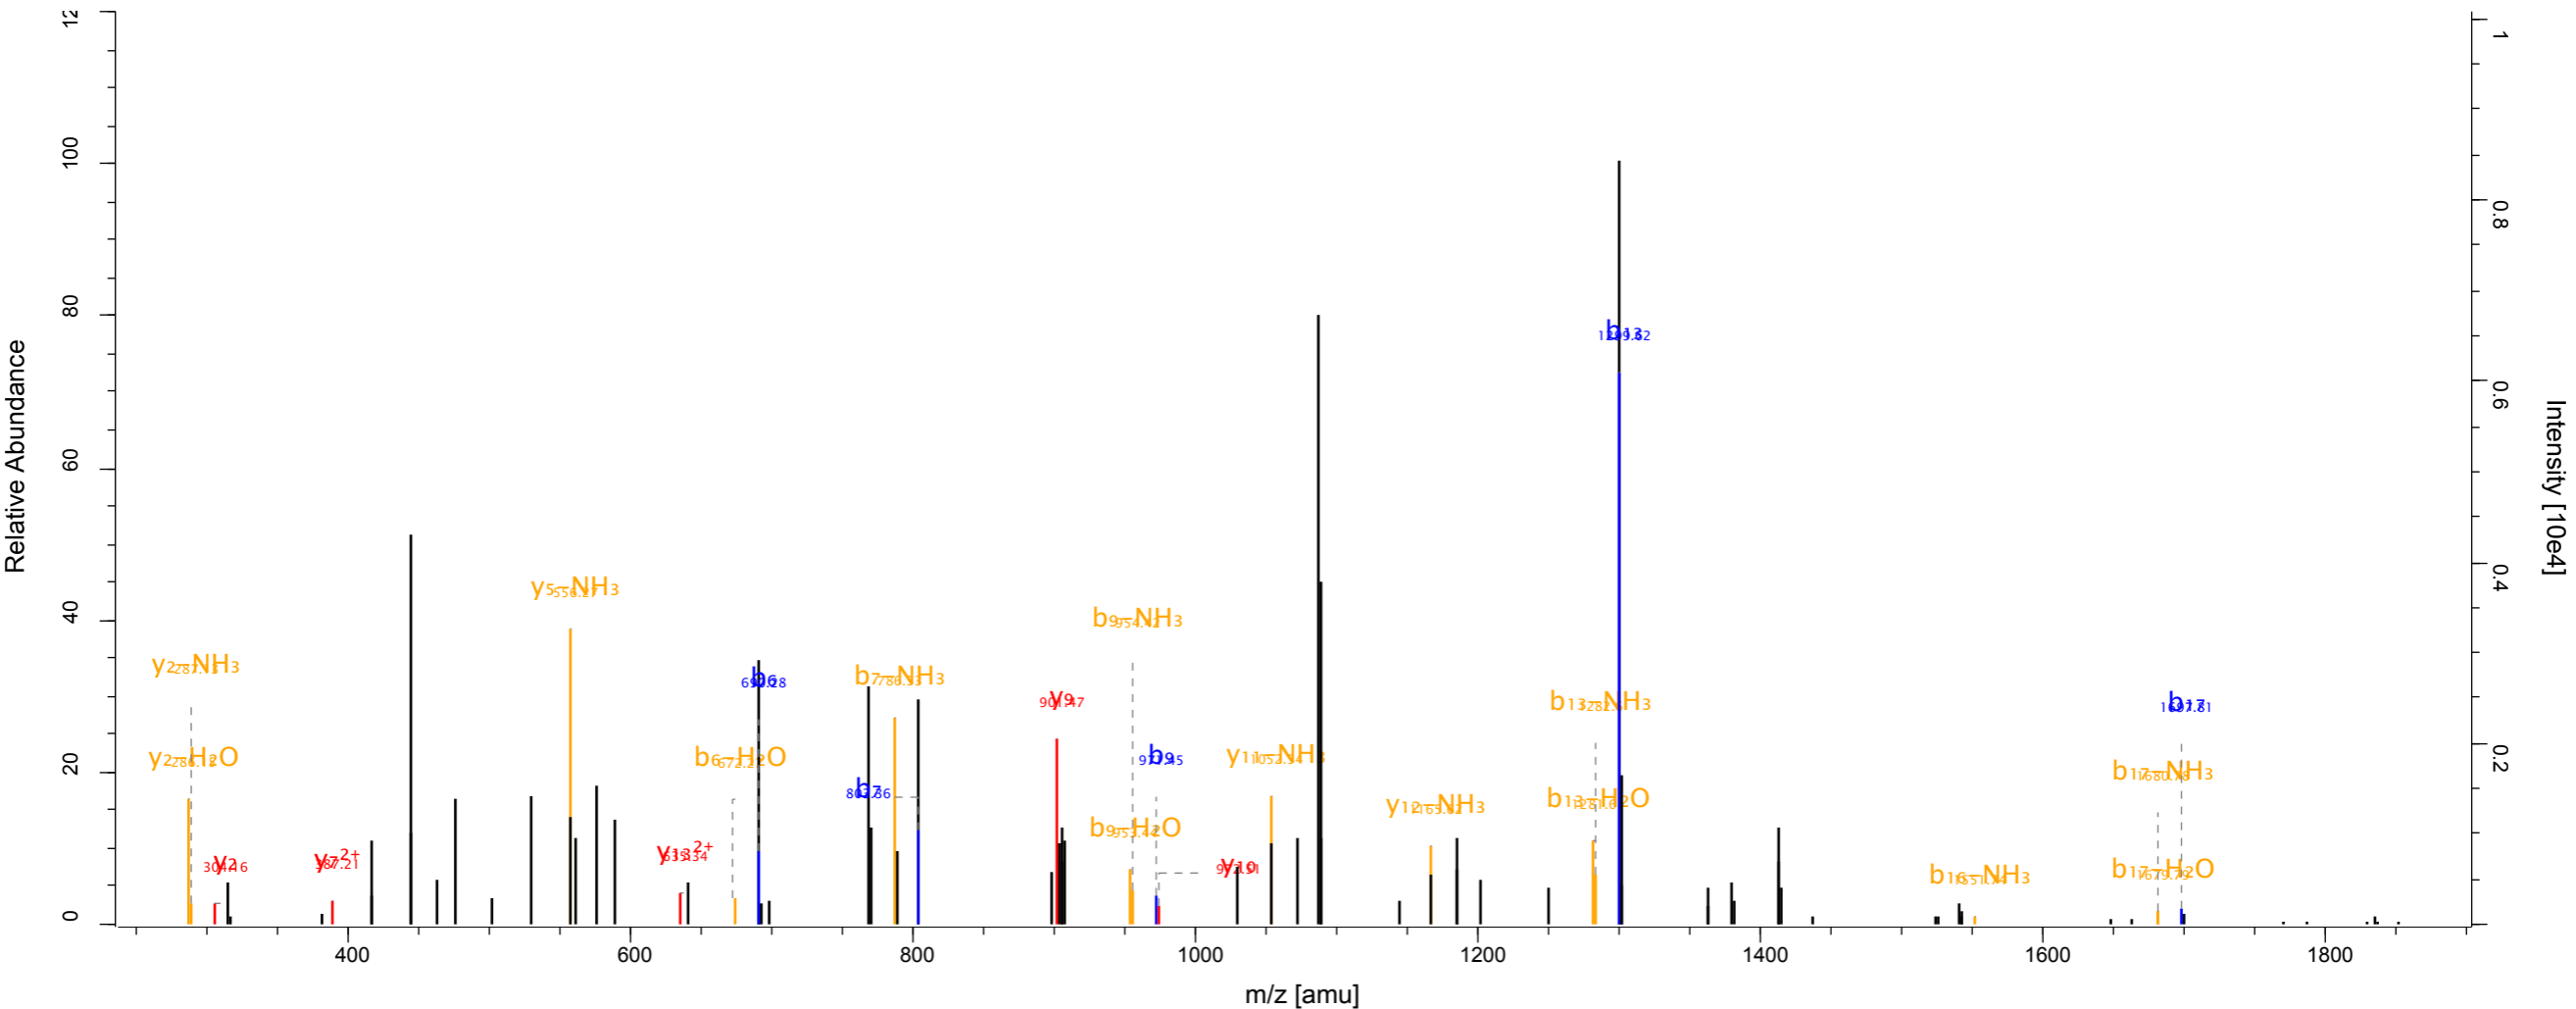

Scan number 8805 Raw file SKaraca\_LMB\_TCE\_Forward\_14\_191011\_rep2  
 Method ITMS; CID Pepti... 147.91

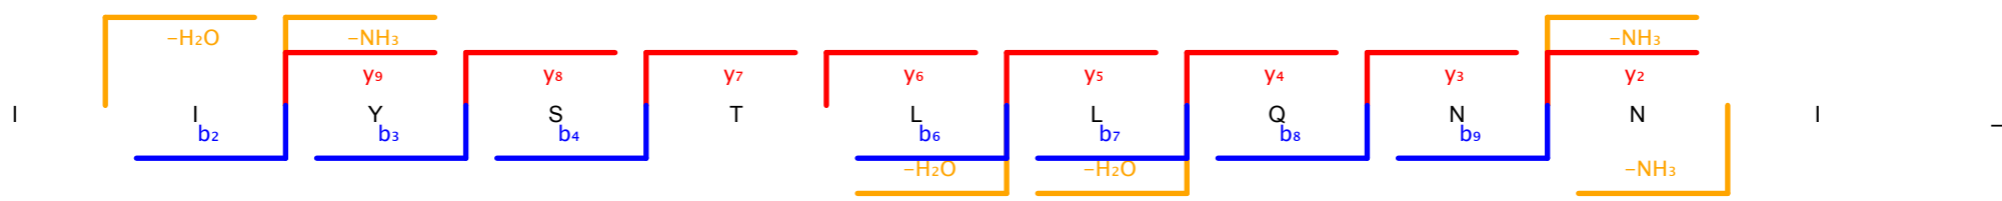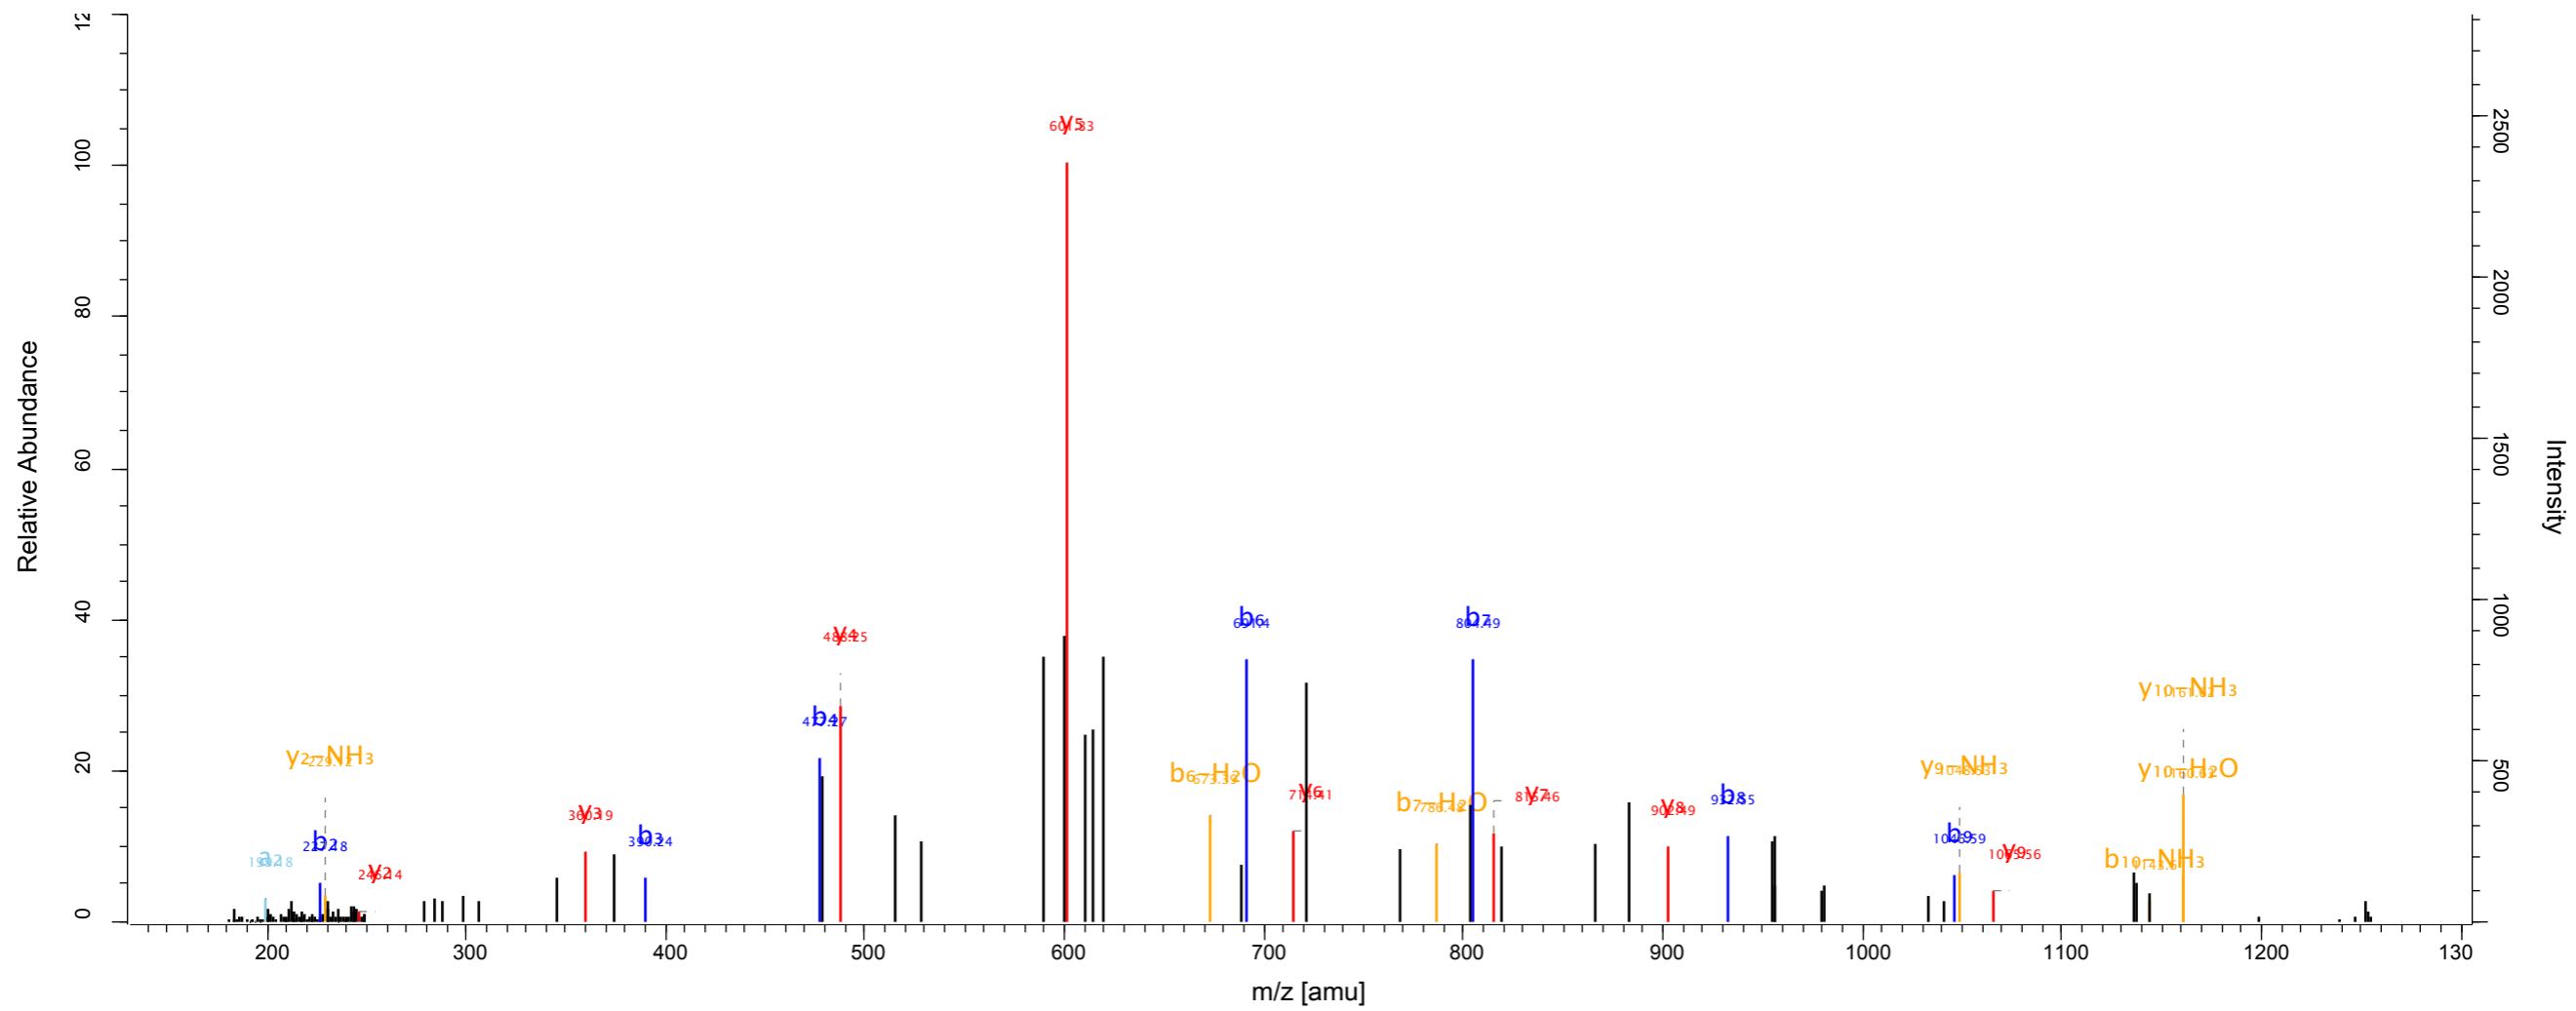

|             |           |          |                                        |
|-------------|-----------|----------|----------------------------------------|
| Scan number | 9076      | Raw file | SKaraca_LMB_TCE_Forward_14_191011_rep2 |
| Method      | ITMS; CID | Pepti... | 124.42                                 |

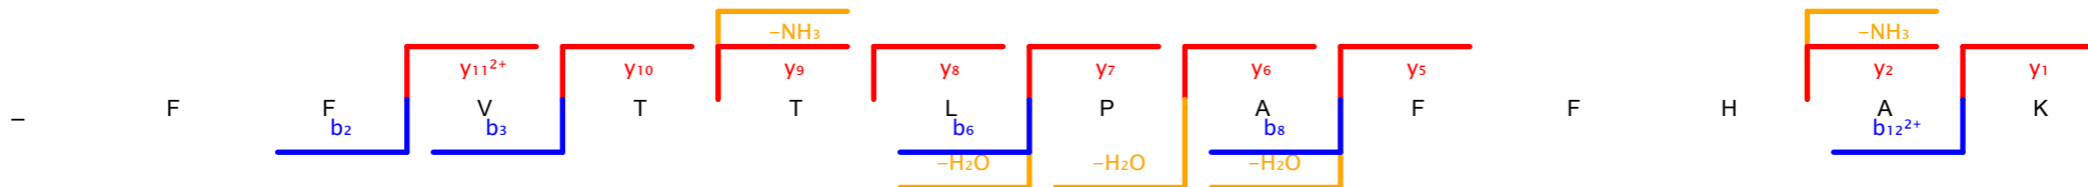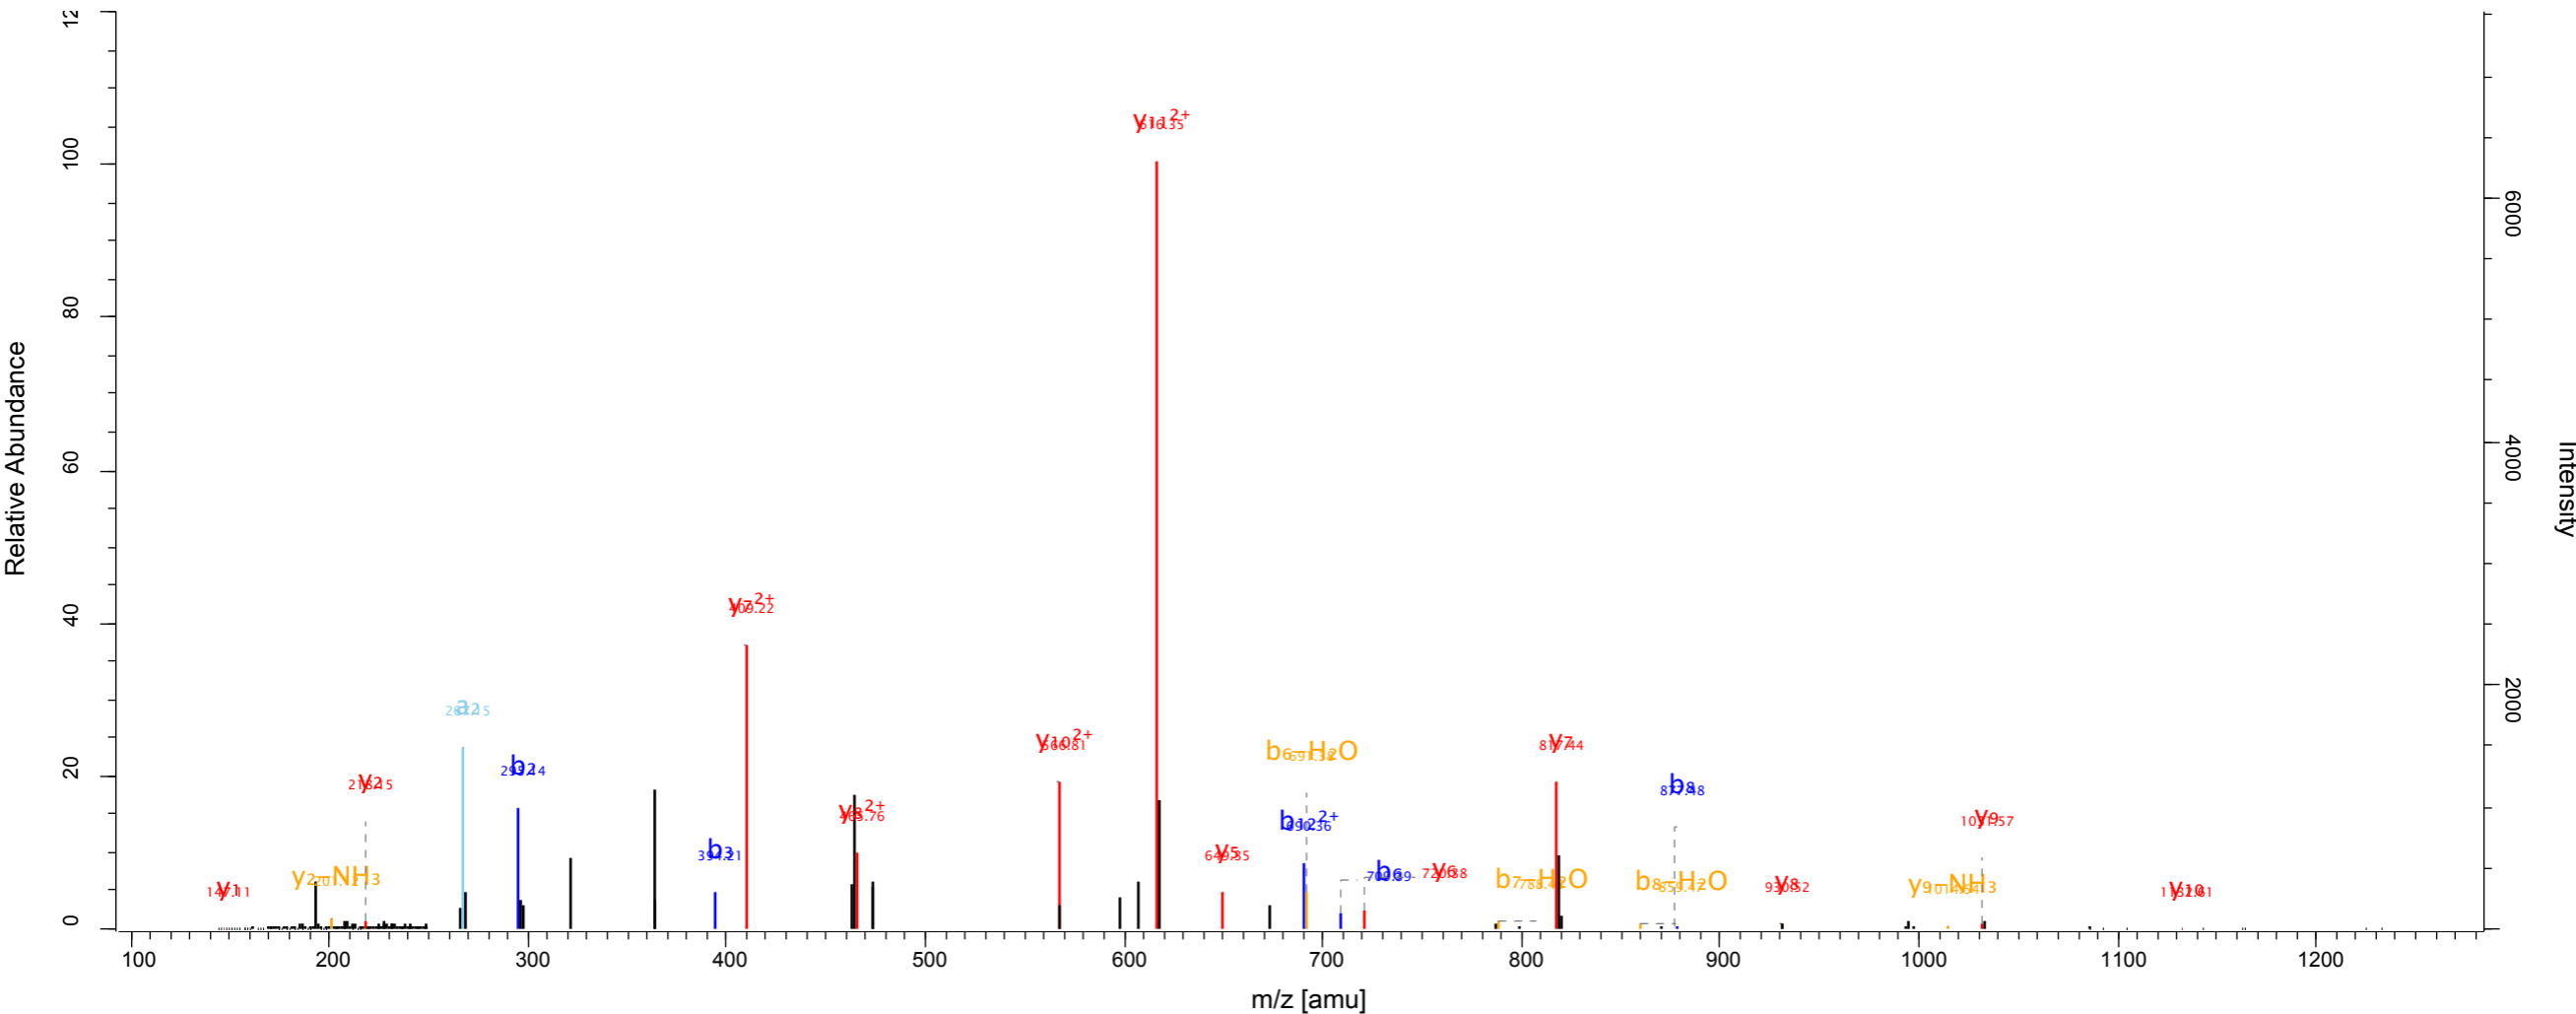

|             |           |          |                                        |
|-------------|-----------|----------|----------------------------------------|
| Scan number | 9849      | Raw file | SKaraca_LMB_TCE_Forward_14_191011_rep2 |
| Method      | ITMS; CID | Pepti... | 109.24                                 |

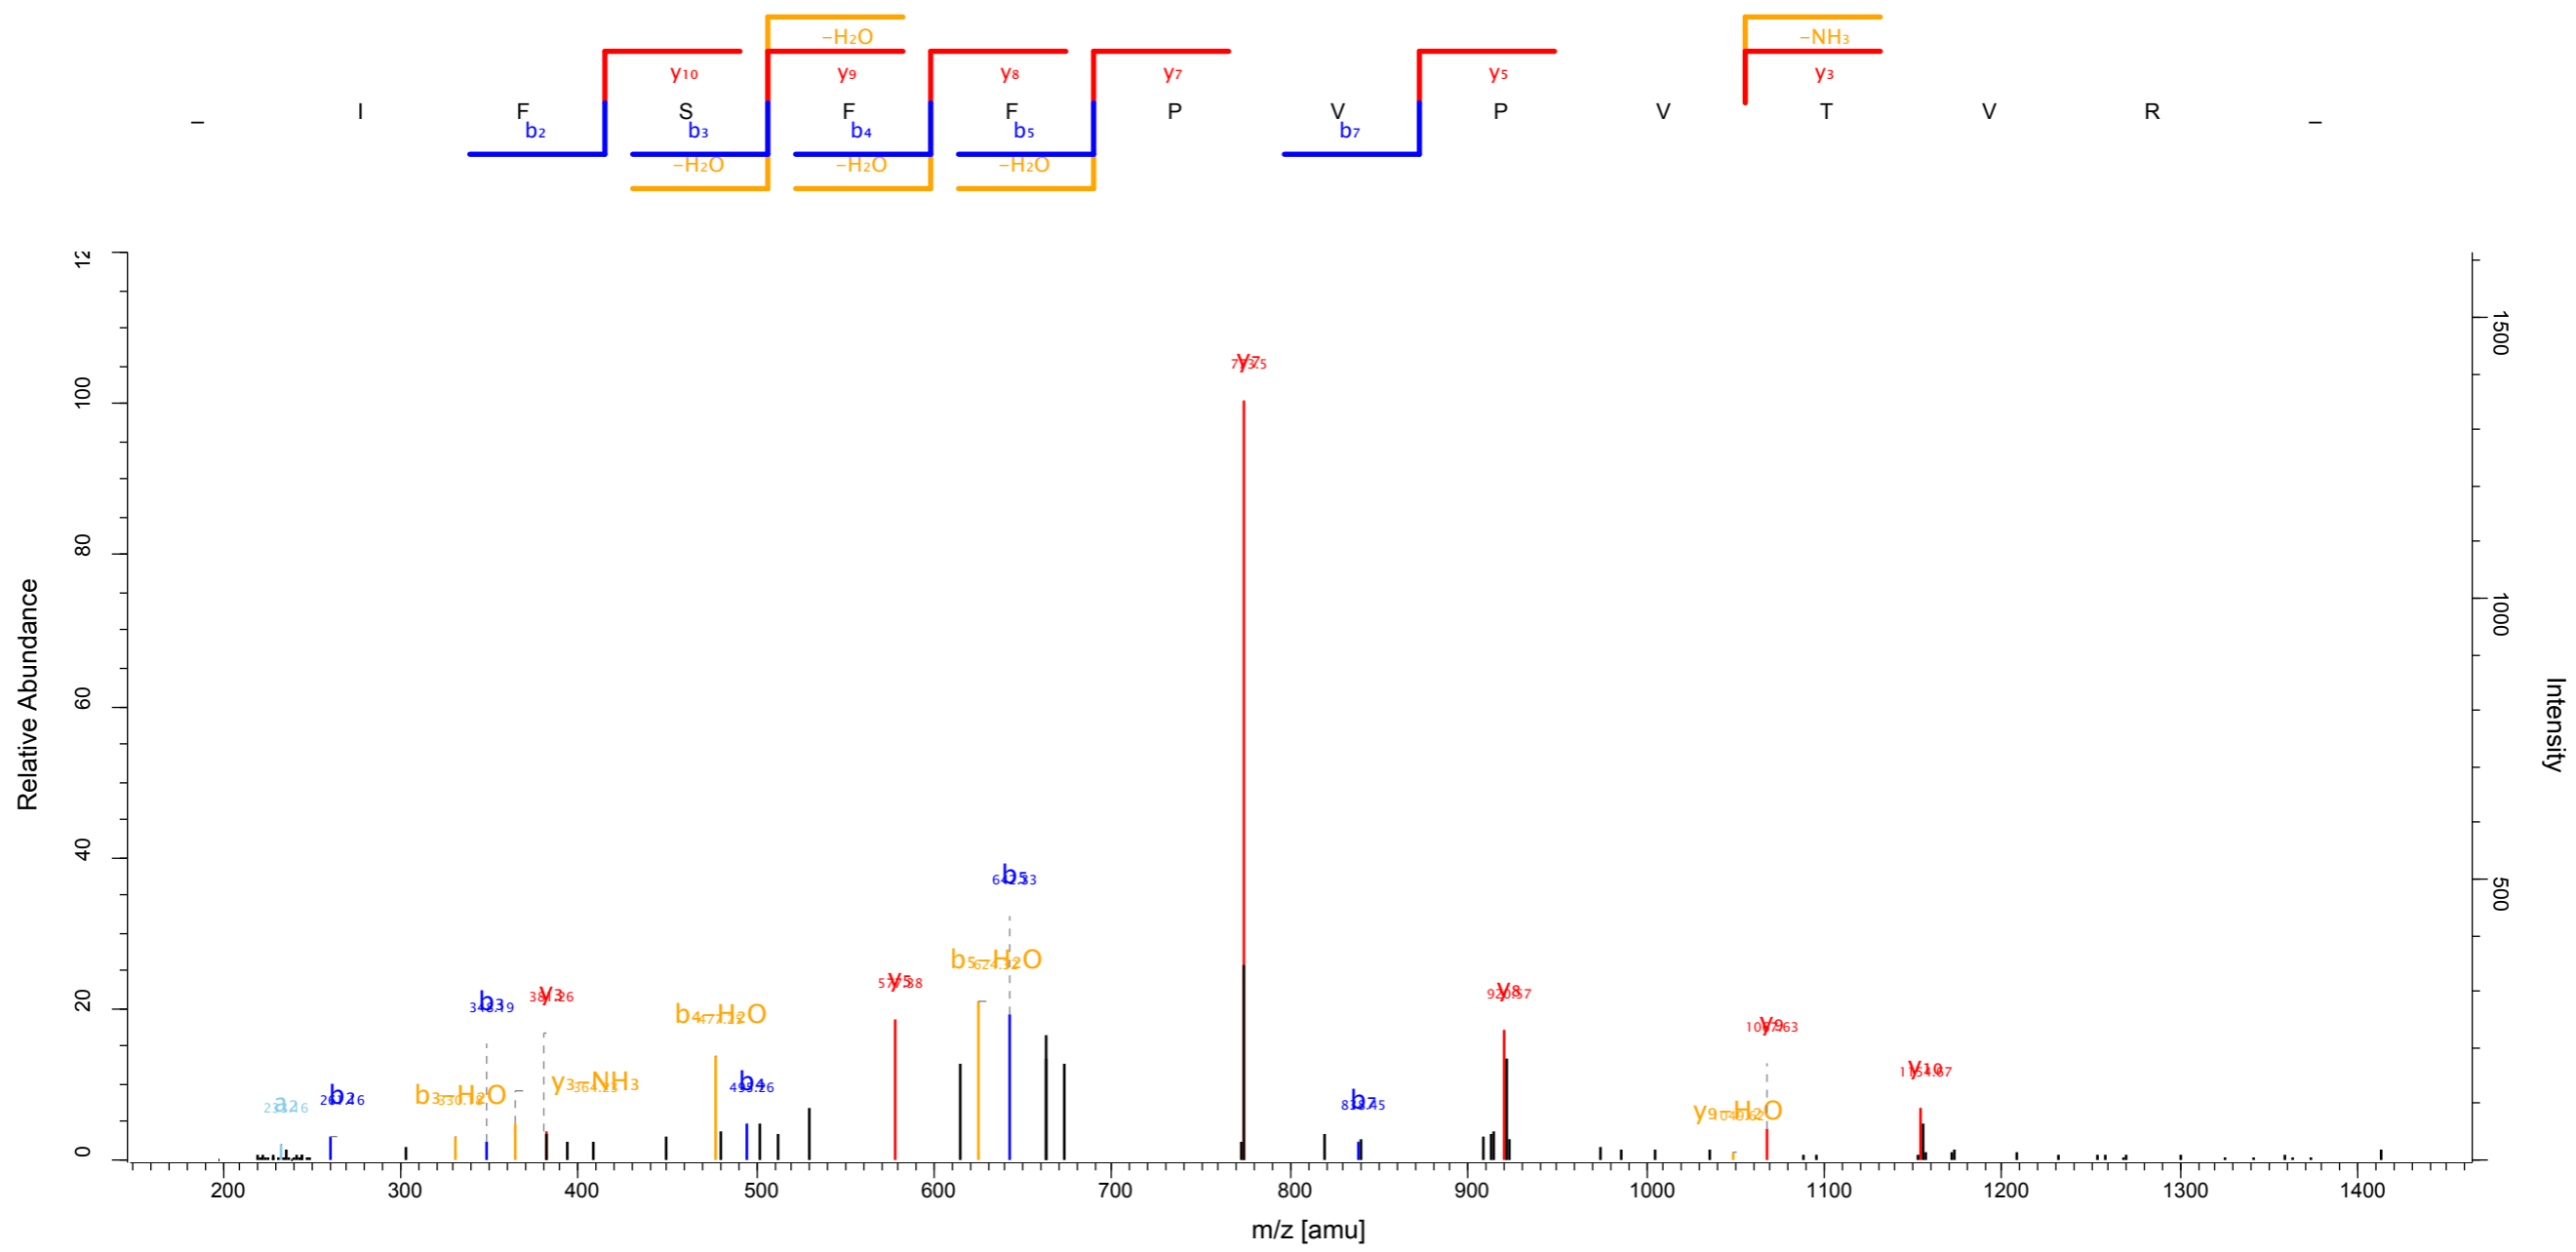

Scan number 2389 Raw file SKaraca\_LMB\_TCE\_Forward\_14\_191011\_rep3  
Method ITMS; CID Pepti... 110.38

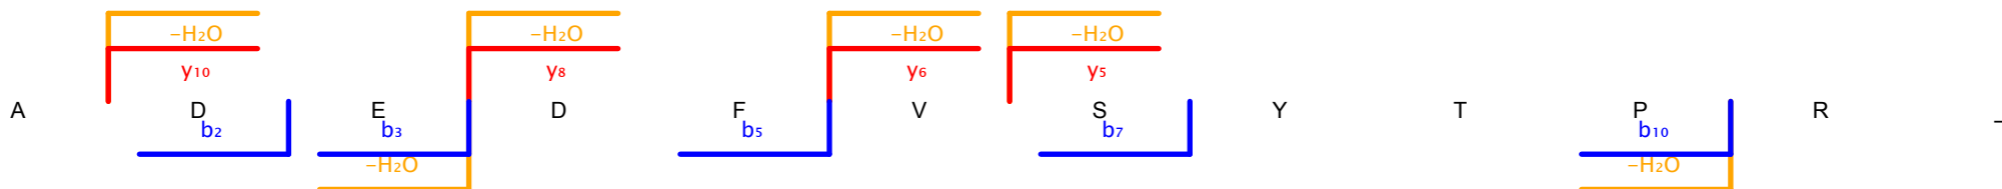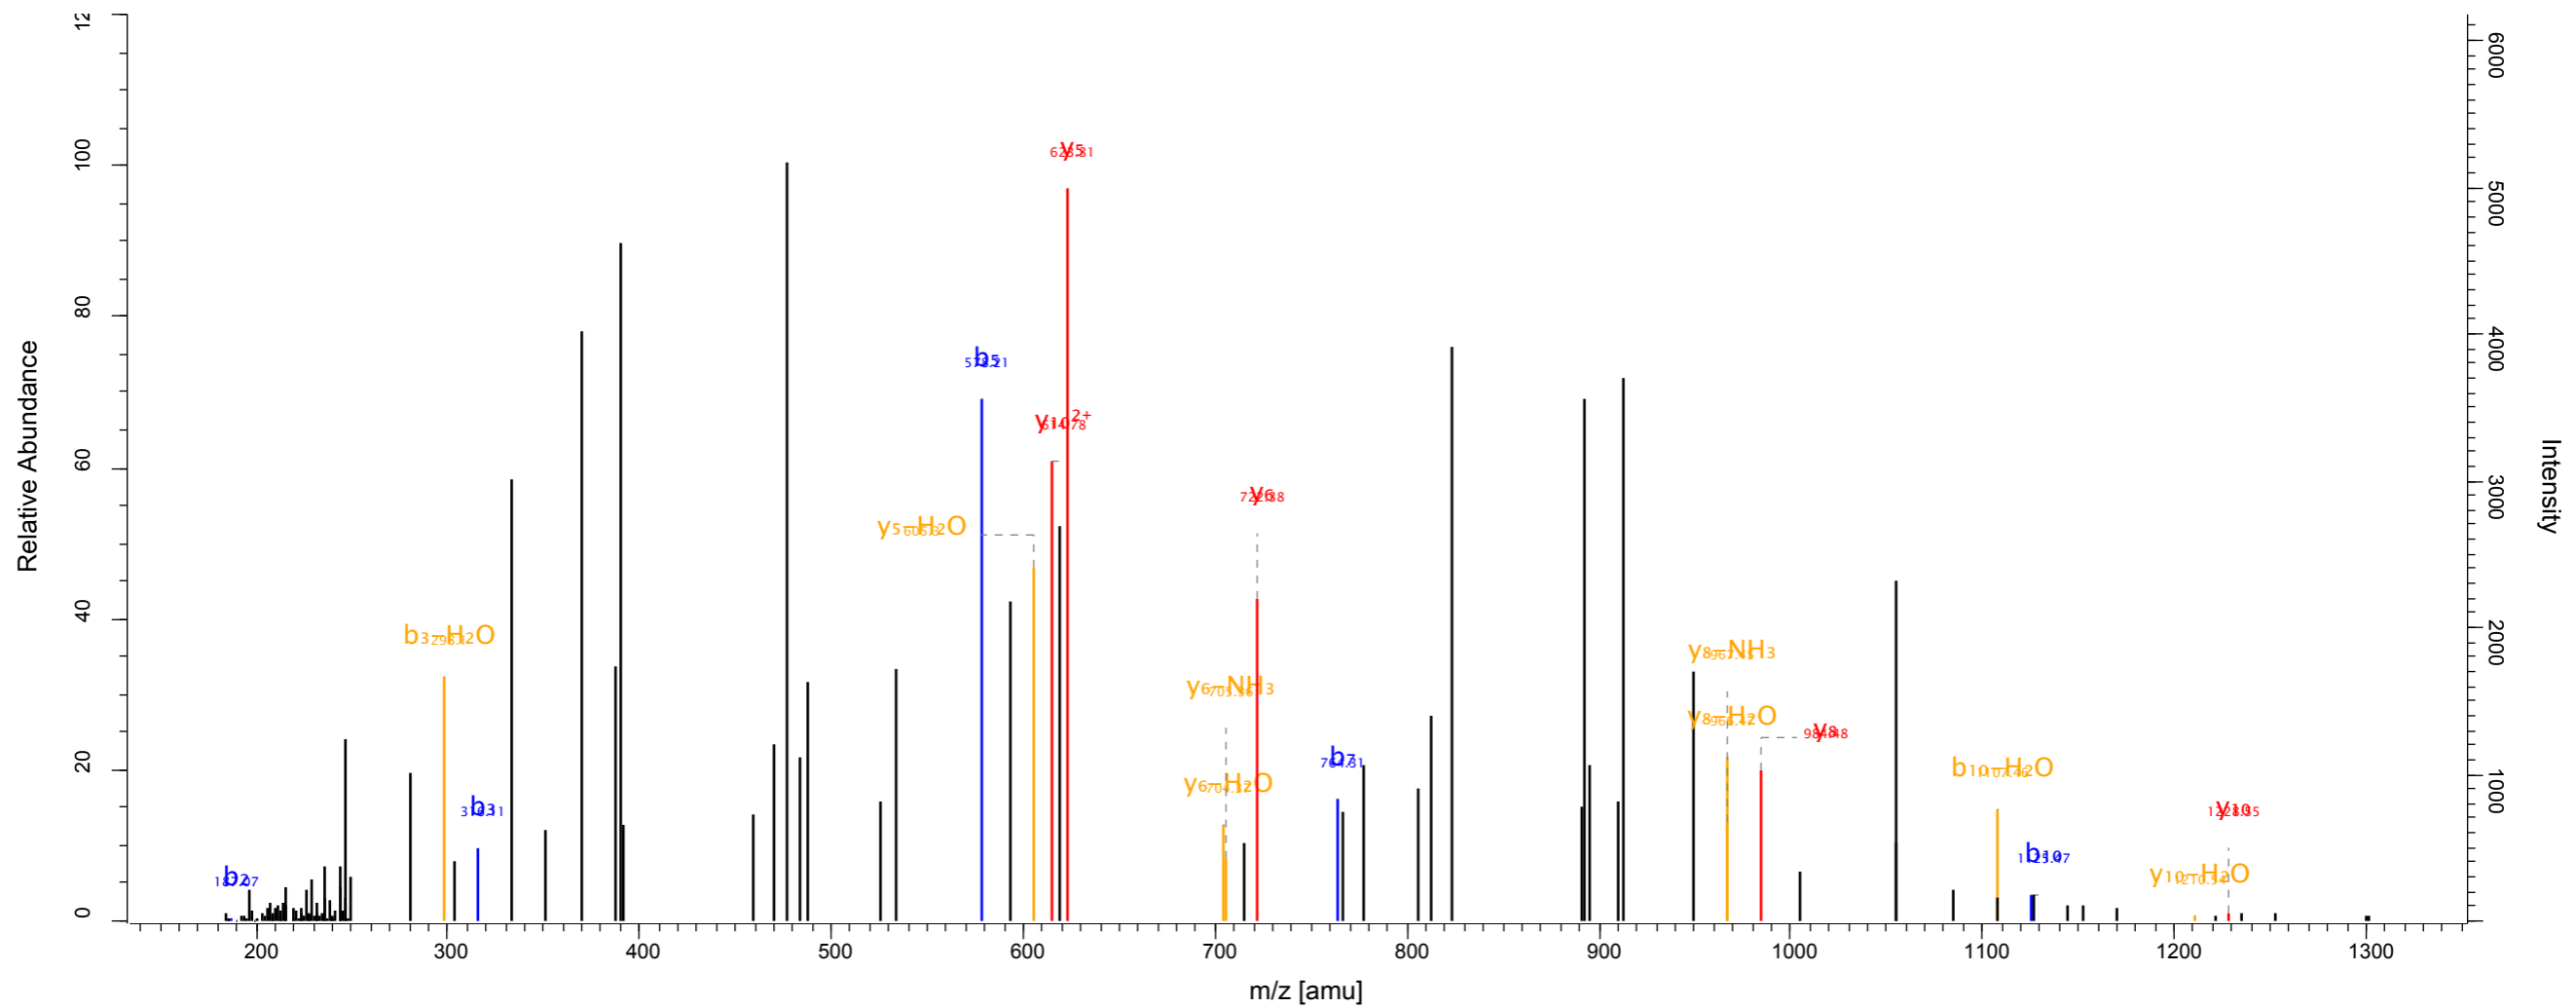

Scan number 1379 Raw file SKaraca\_LMB\_TCE\_Forward\_15\_191011\_rep1  
 Method ITMS; CID Pepti... 198.72

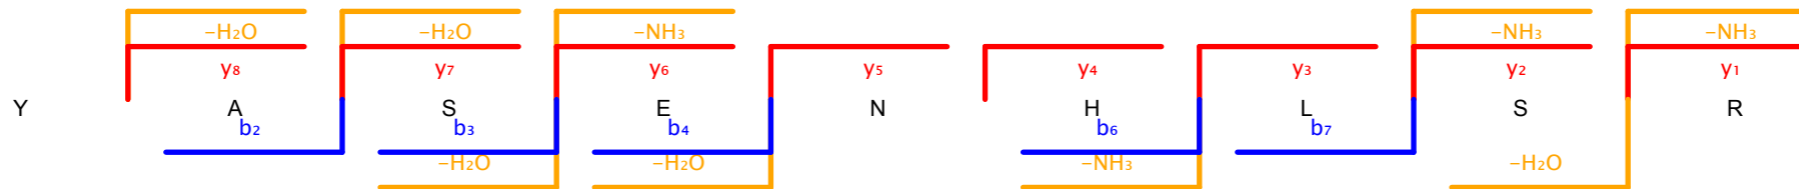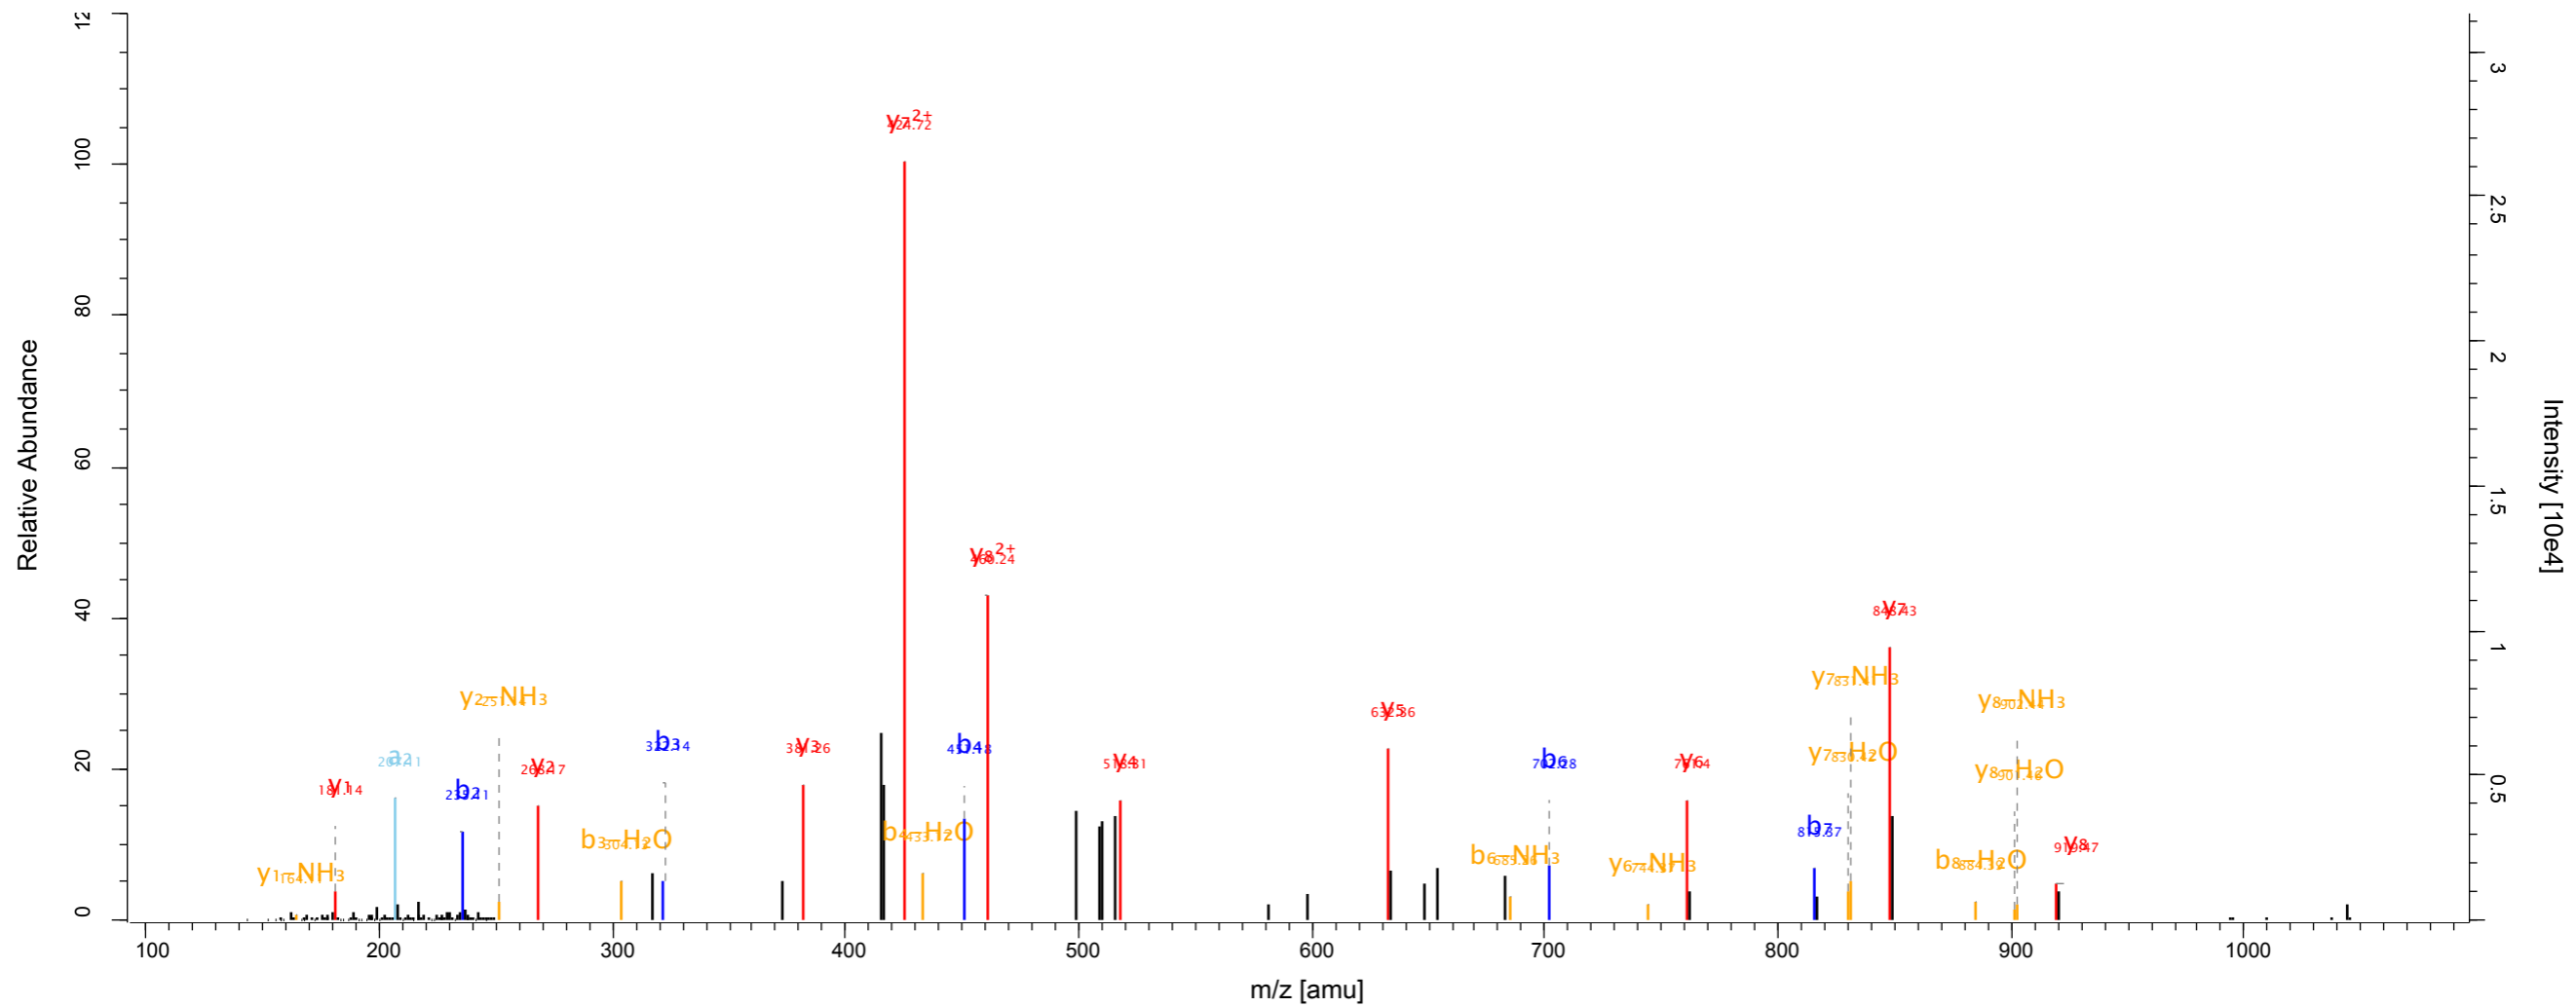



|             |           |          |                                        |
|-------------|-----------|----------|----------------------------------------|
| Scan number | 6086      | Raw file | SKaraca_LMB_TCE_Forward_15_191011_rep1 |
| Method      | ITMS; CID | Pepti... | 128.27                                 |

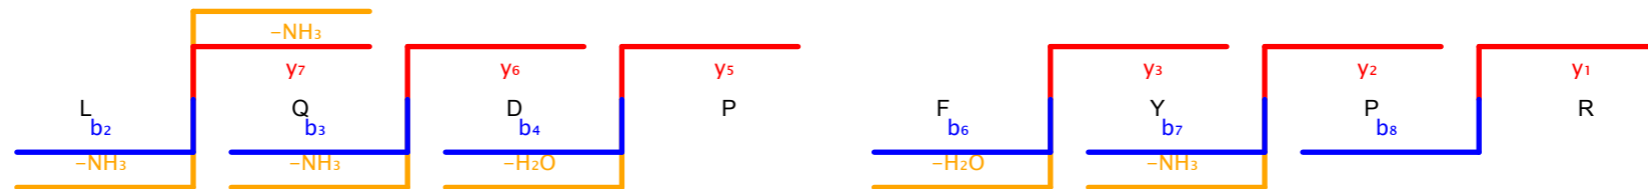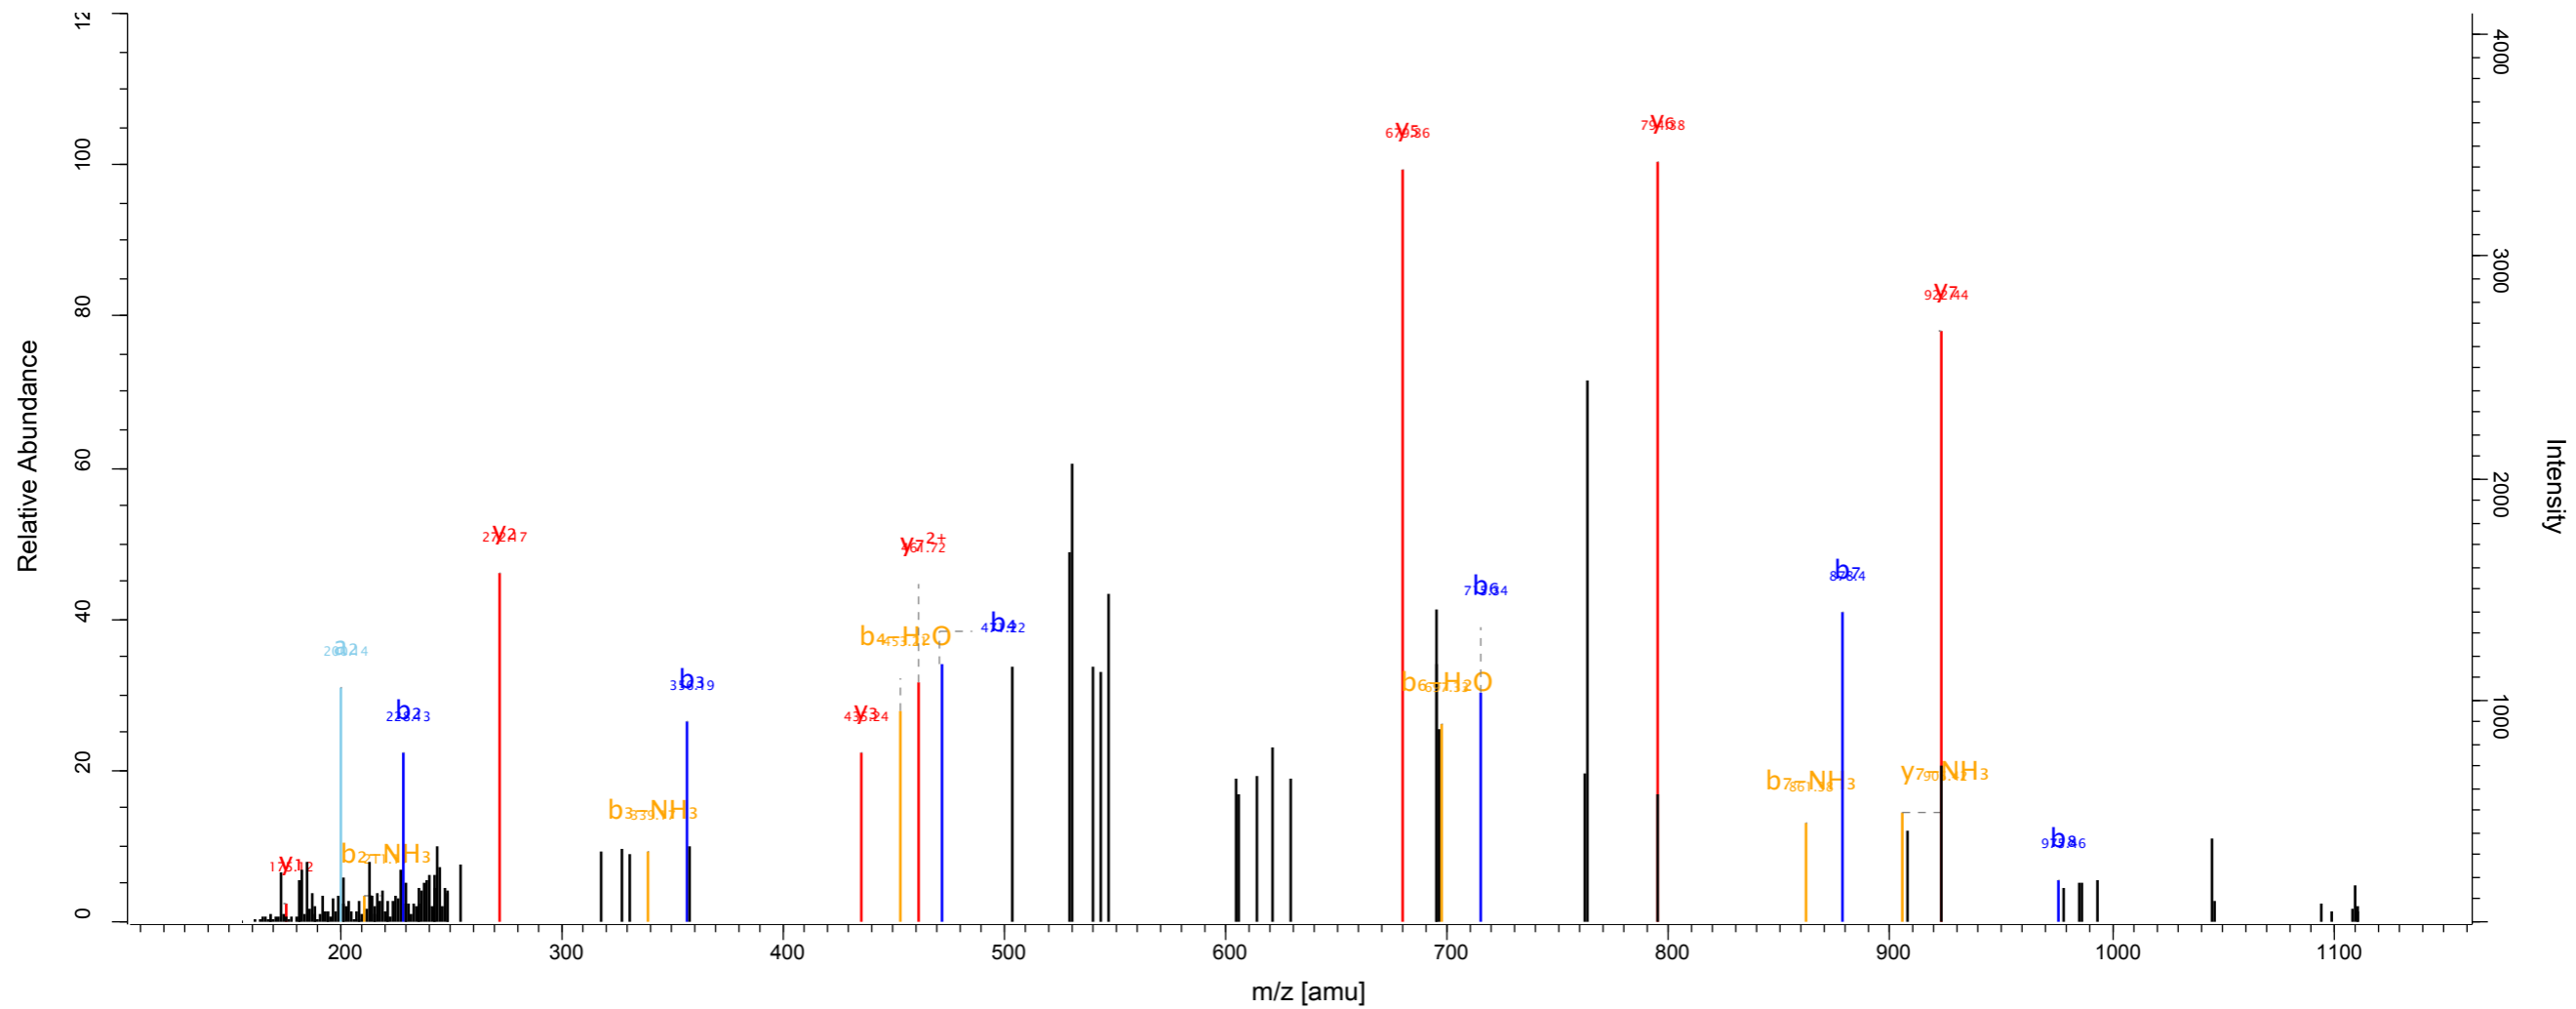

|             |           |          |                                        |
|-------------|-----------|----------|----------------------------------------|
| Scan number | 8761      | Raw file | SKaraca_LMB_TCE_Forward_15_191011_rep1 |
| Method      | ITMS; CID | Pepti... | 168.76                                 |

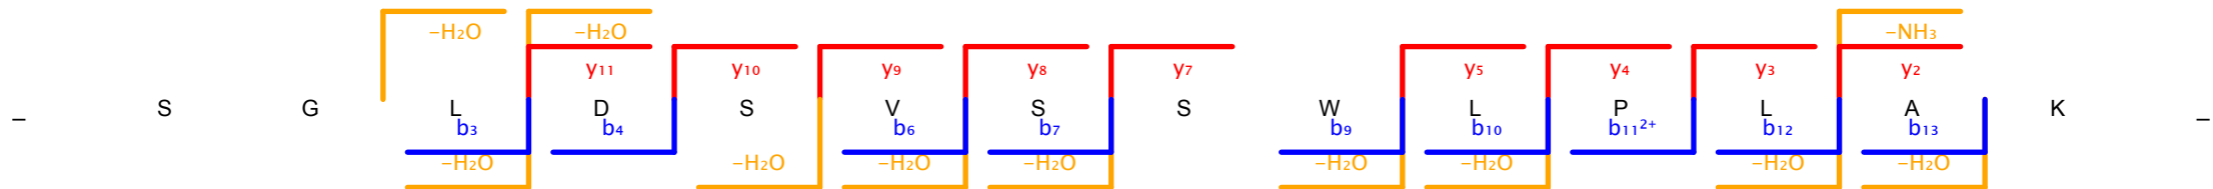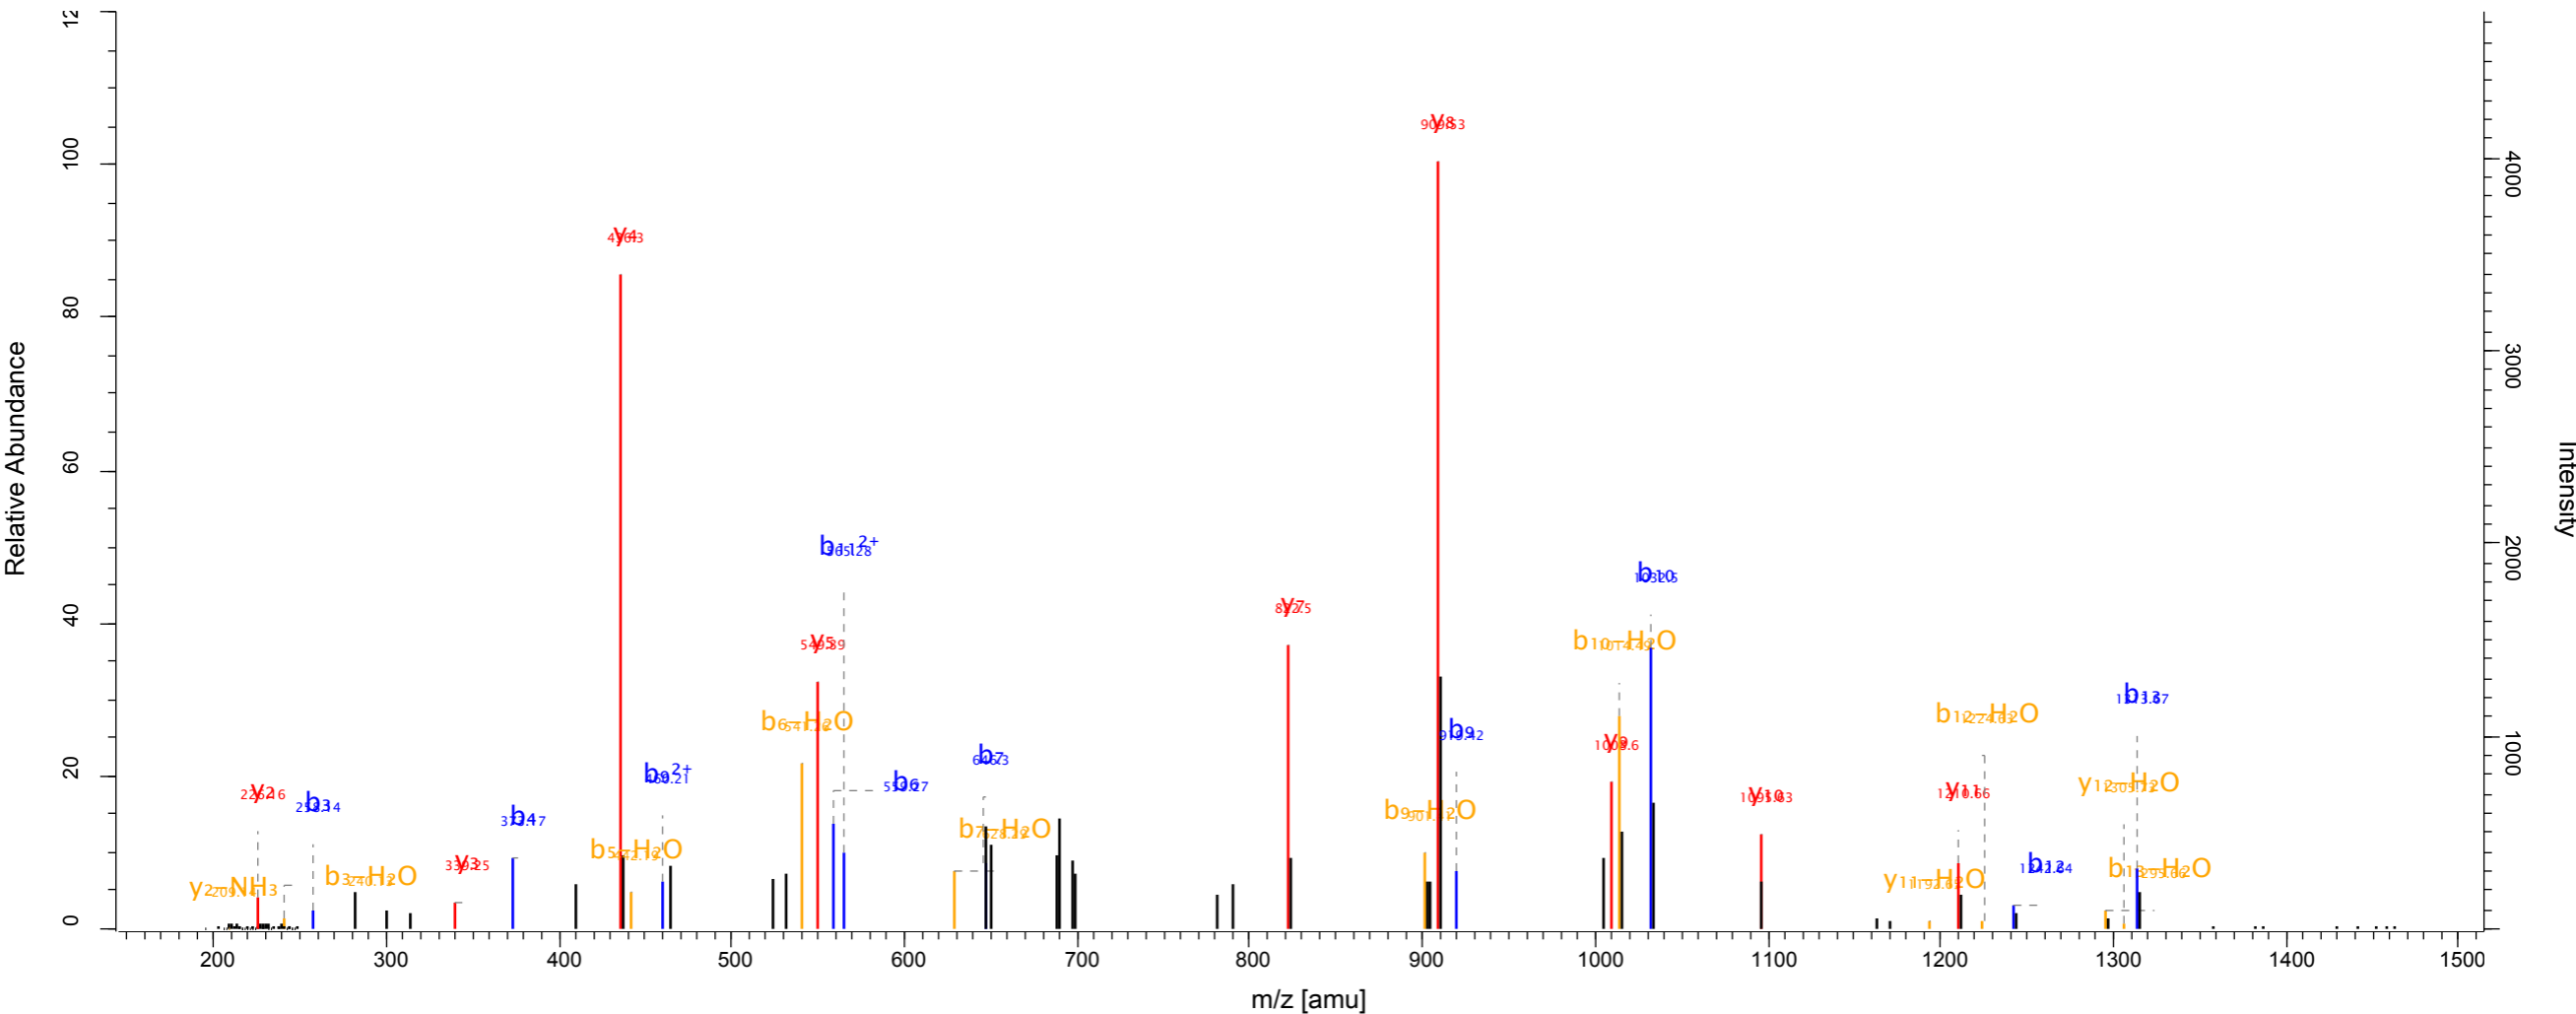

Scan number 9476 Raw file SKaraca\_LMB\_TCE\_Forward\_15\_191011\_rep2  
Method ITMS; CID Pepti... 101.62

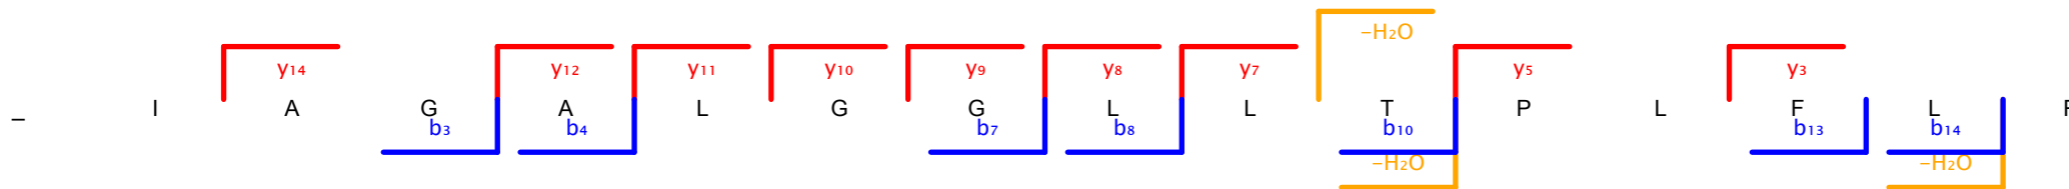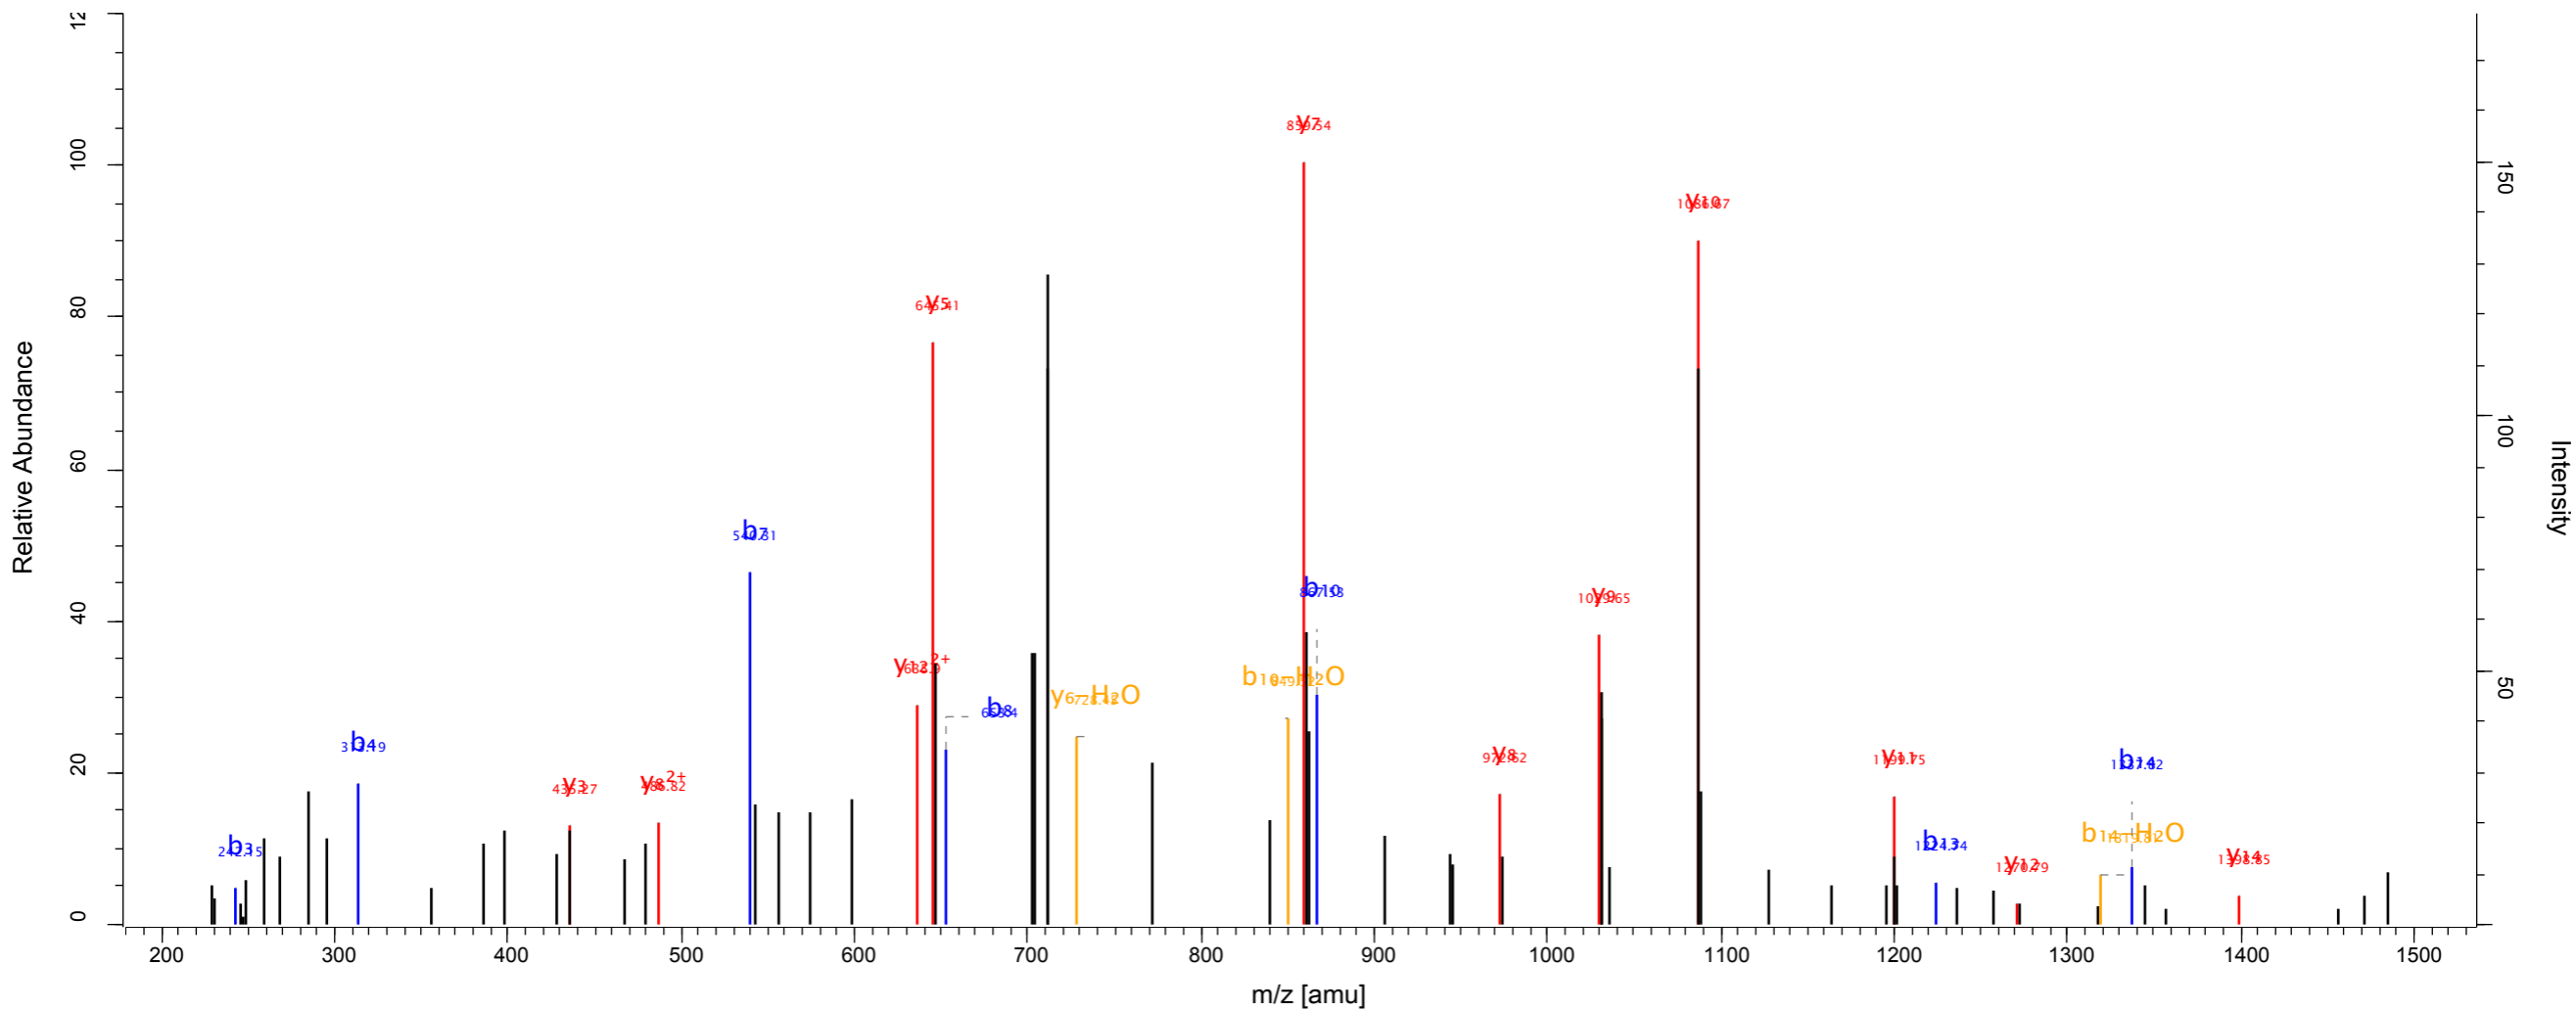

|             |           |          |                                        |
|-------------|-----------|----------|----------------------------------------|
| Scan number | 4271      | Raw file | SKaraca_LMB_TCE_Forward_15_191011_rep3 |
| Method      | ITMS; CID | Pepti... | 138.91                                 |

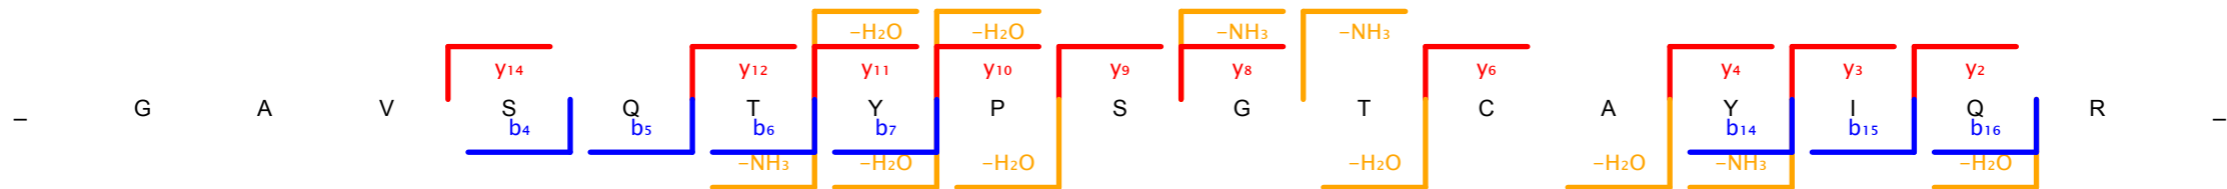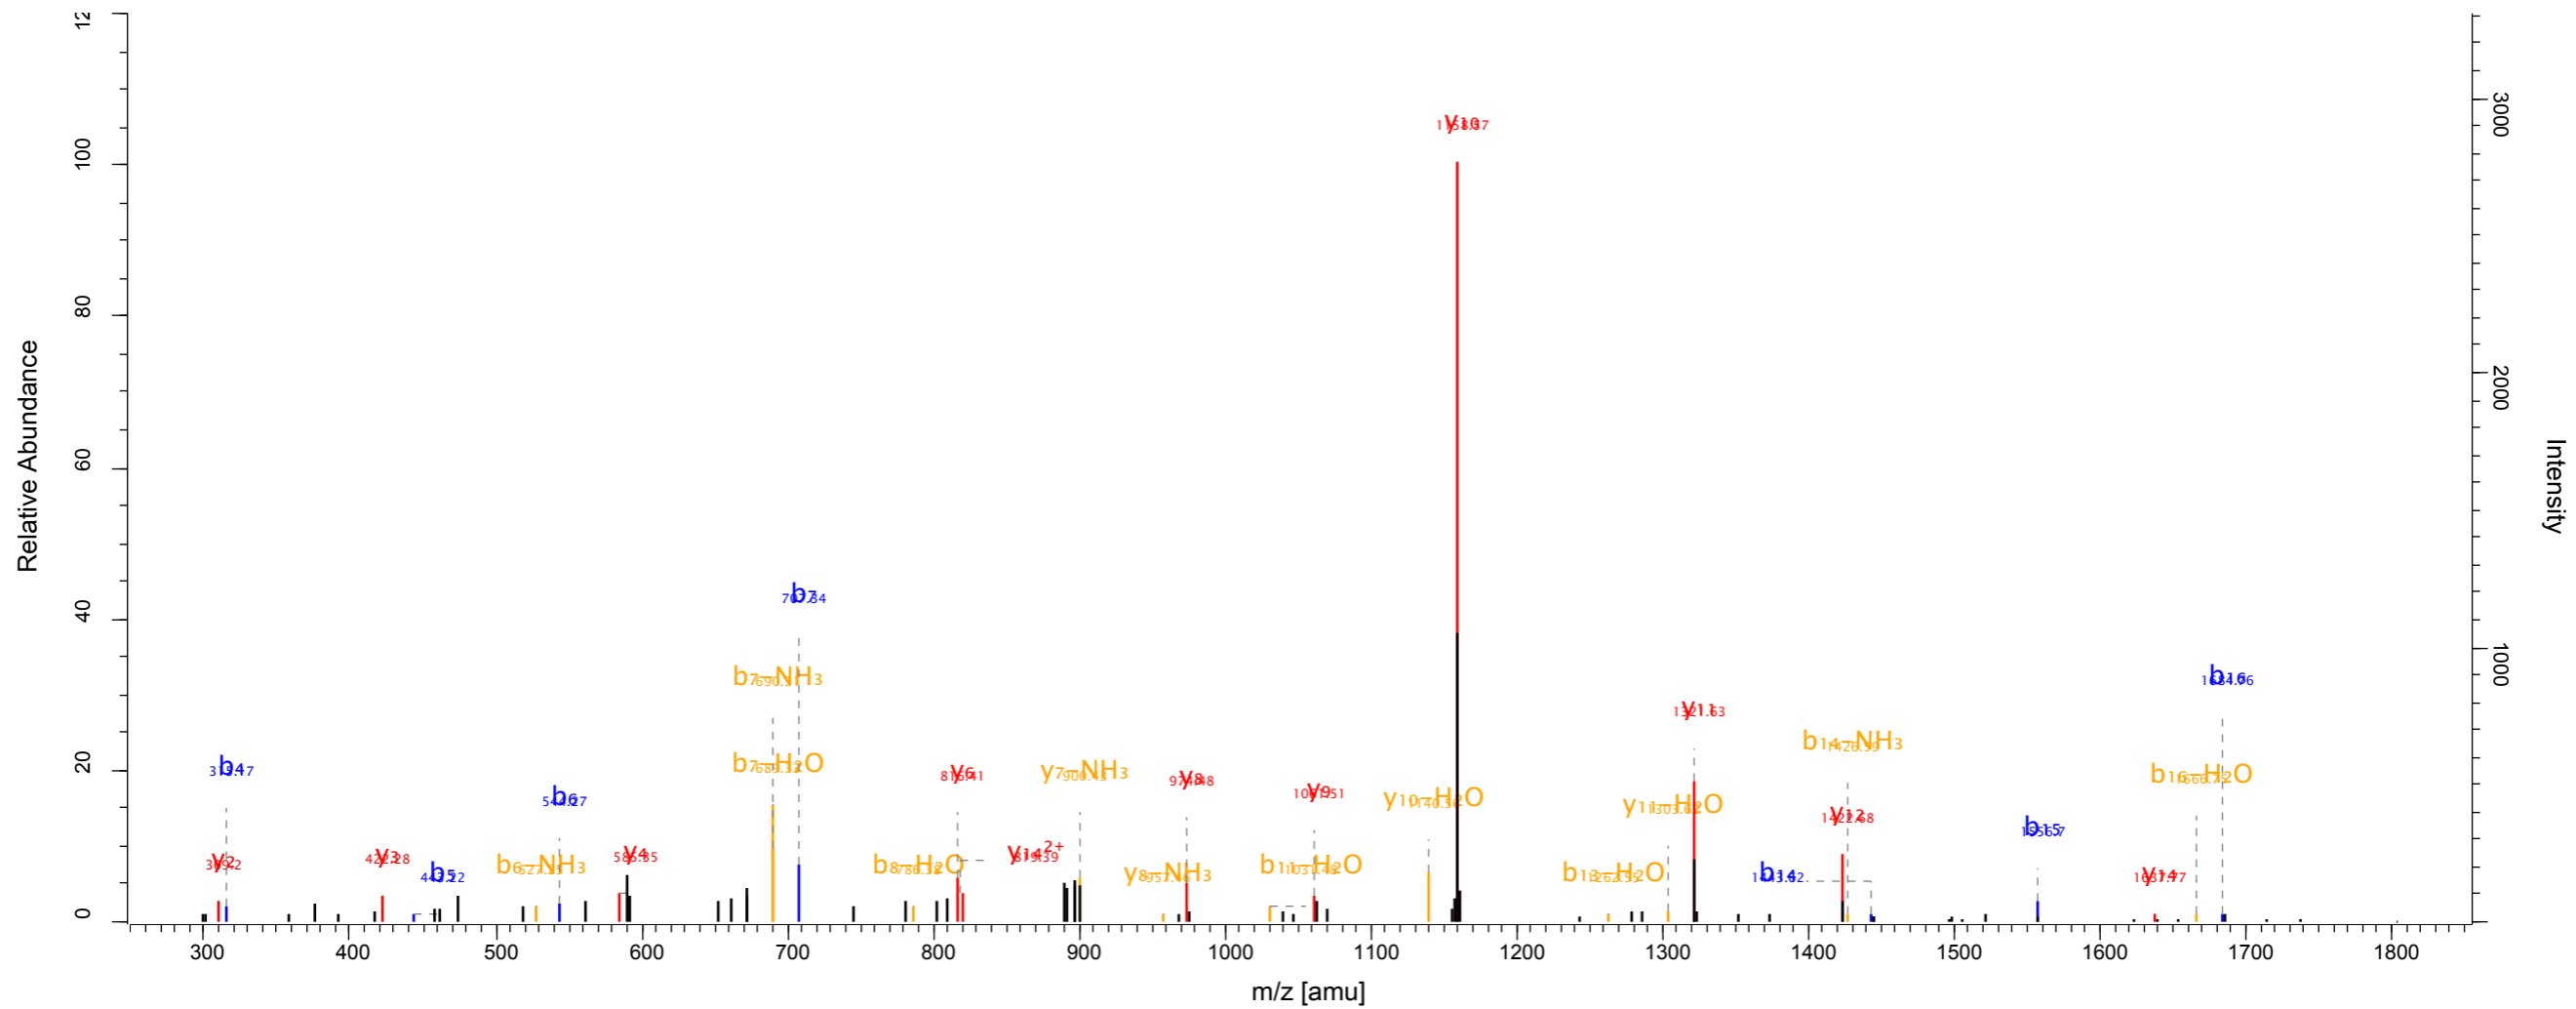

Scan number 4441 Raw file SKaraca\_LMB\_TCE\_Forward\_15\_191011\_rep3  
 Method ITMS; CID Pepti... 87.14

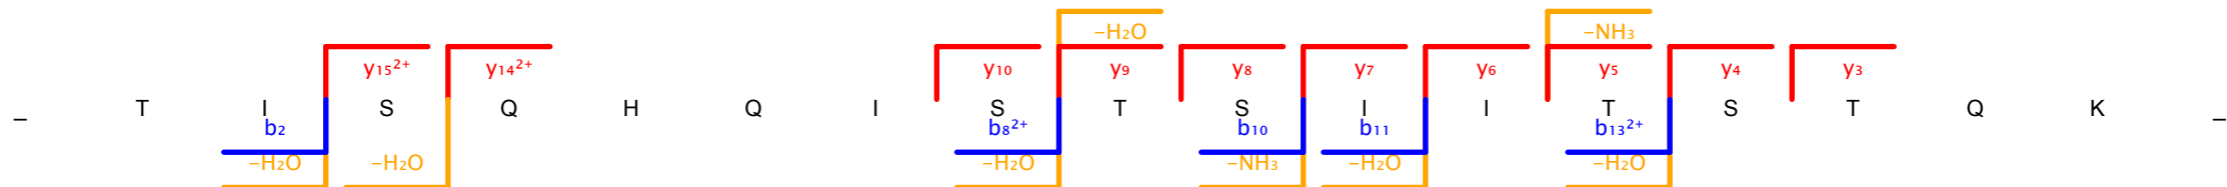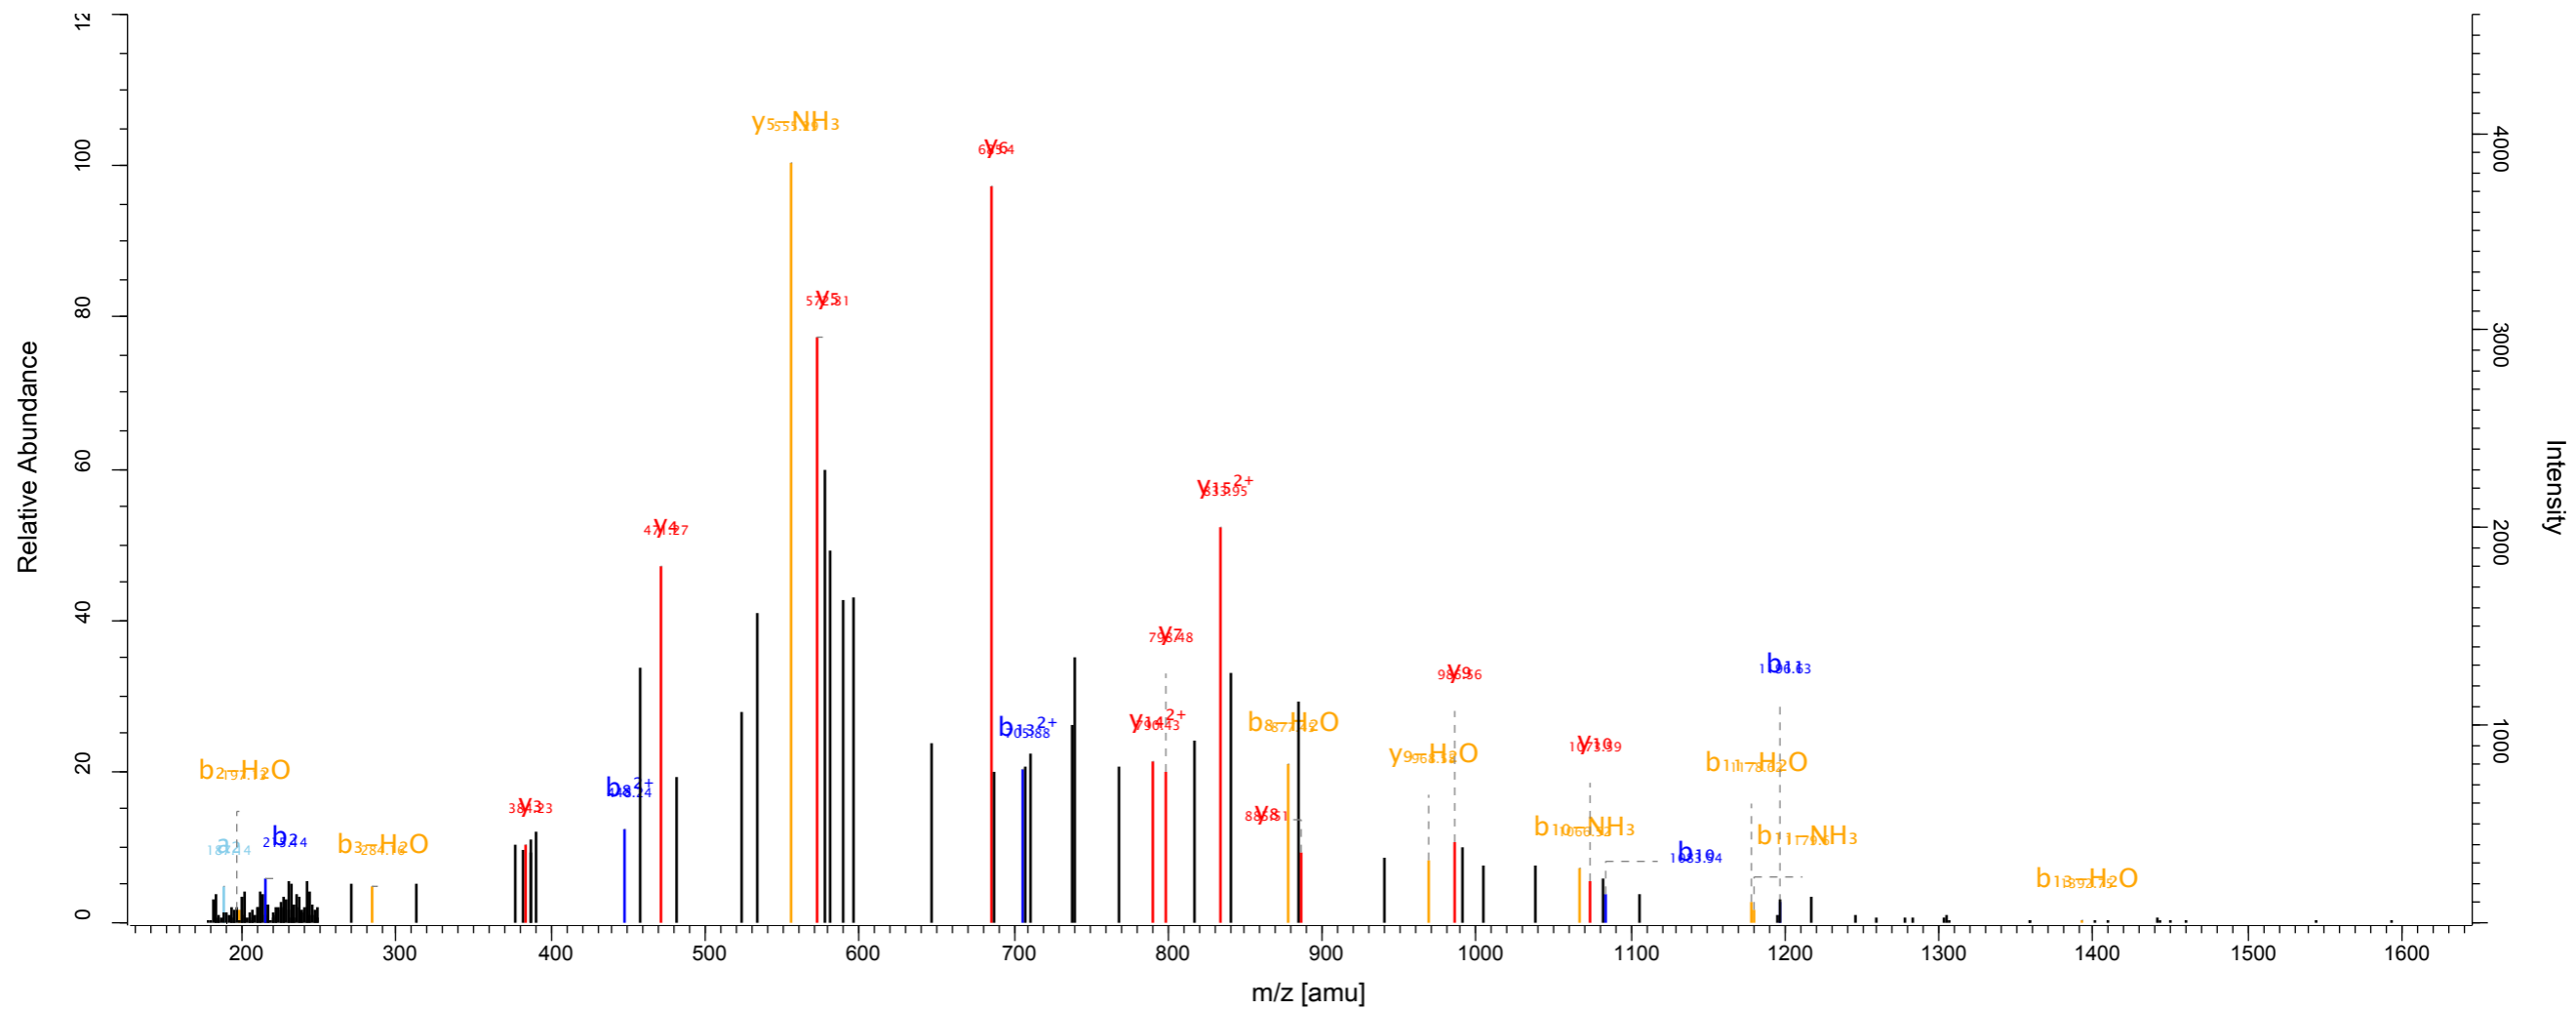

Scan number 8116 Raw file SKaraca\_LMB\_TCE\_Forward\_15\_191011\_rep3  
 Method ITMS; CID Pepti... 153.75

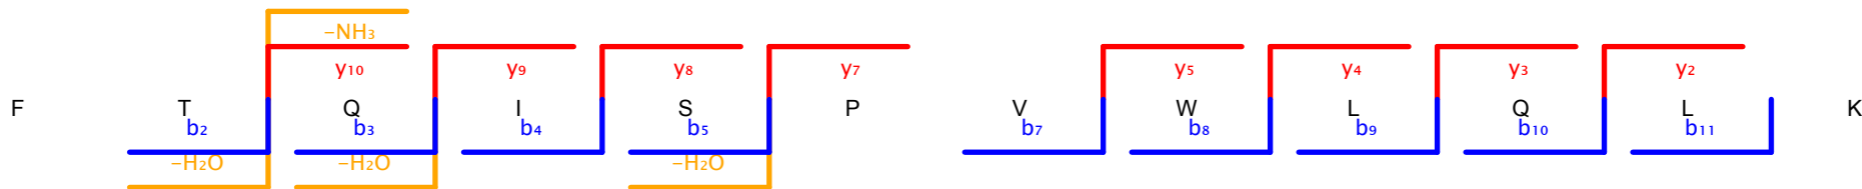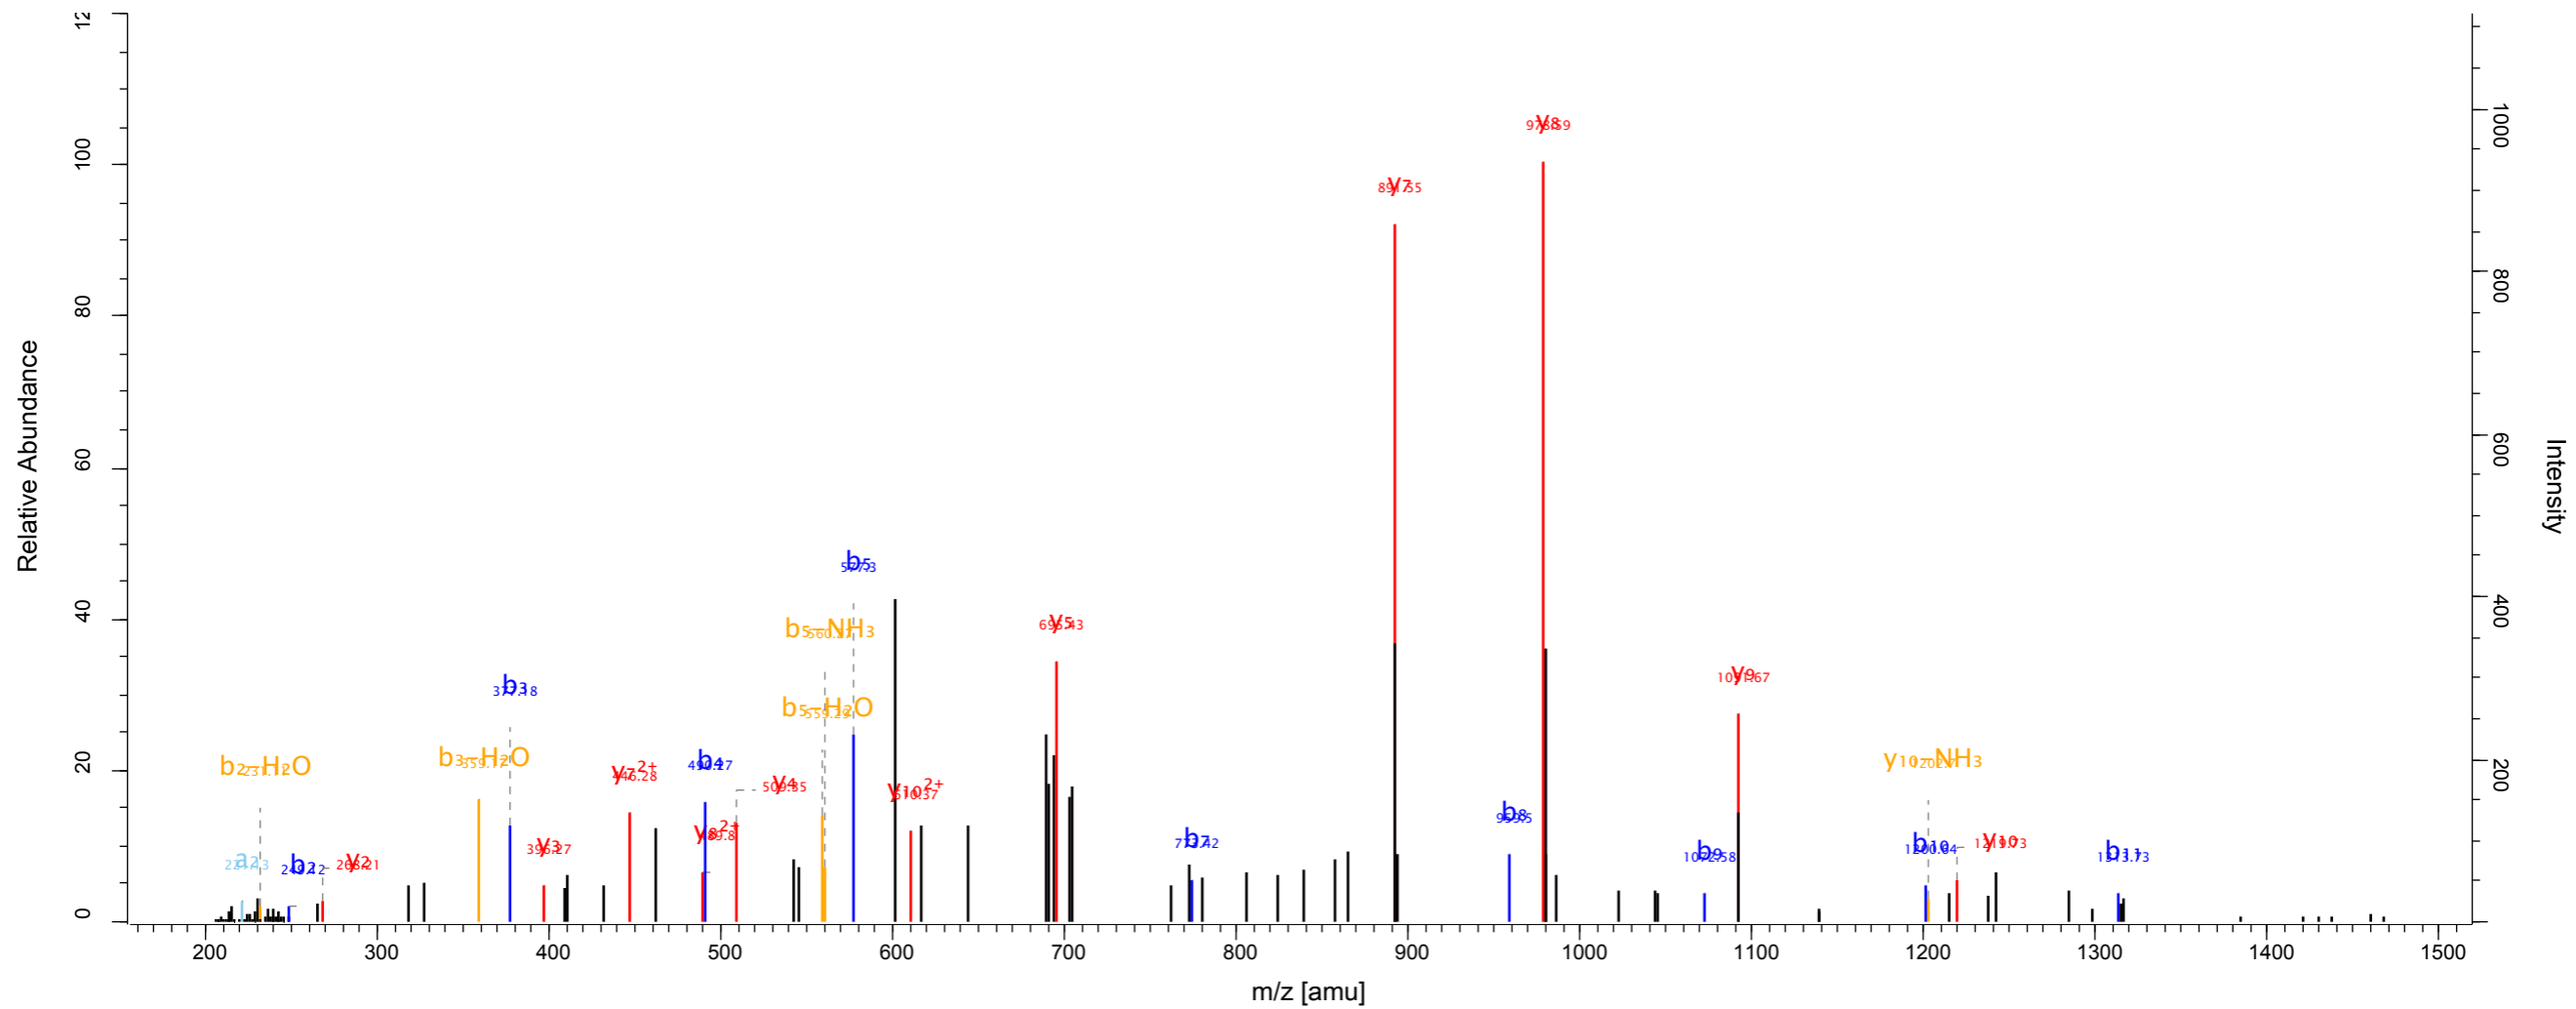

Scan number 10144 Raw file SKaraca\_LMB\_TCE\_Forward\_16\_191011\_rep1  
 Method ITMS; CID Pepti... 143.42

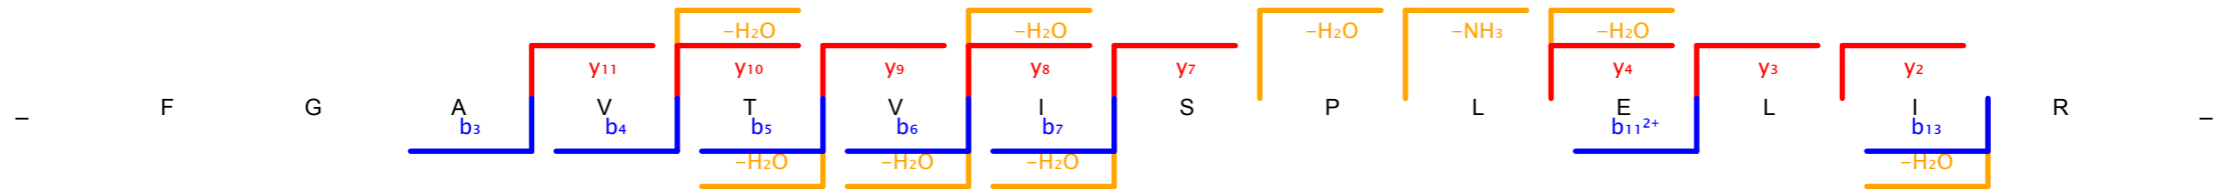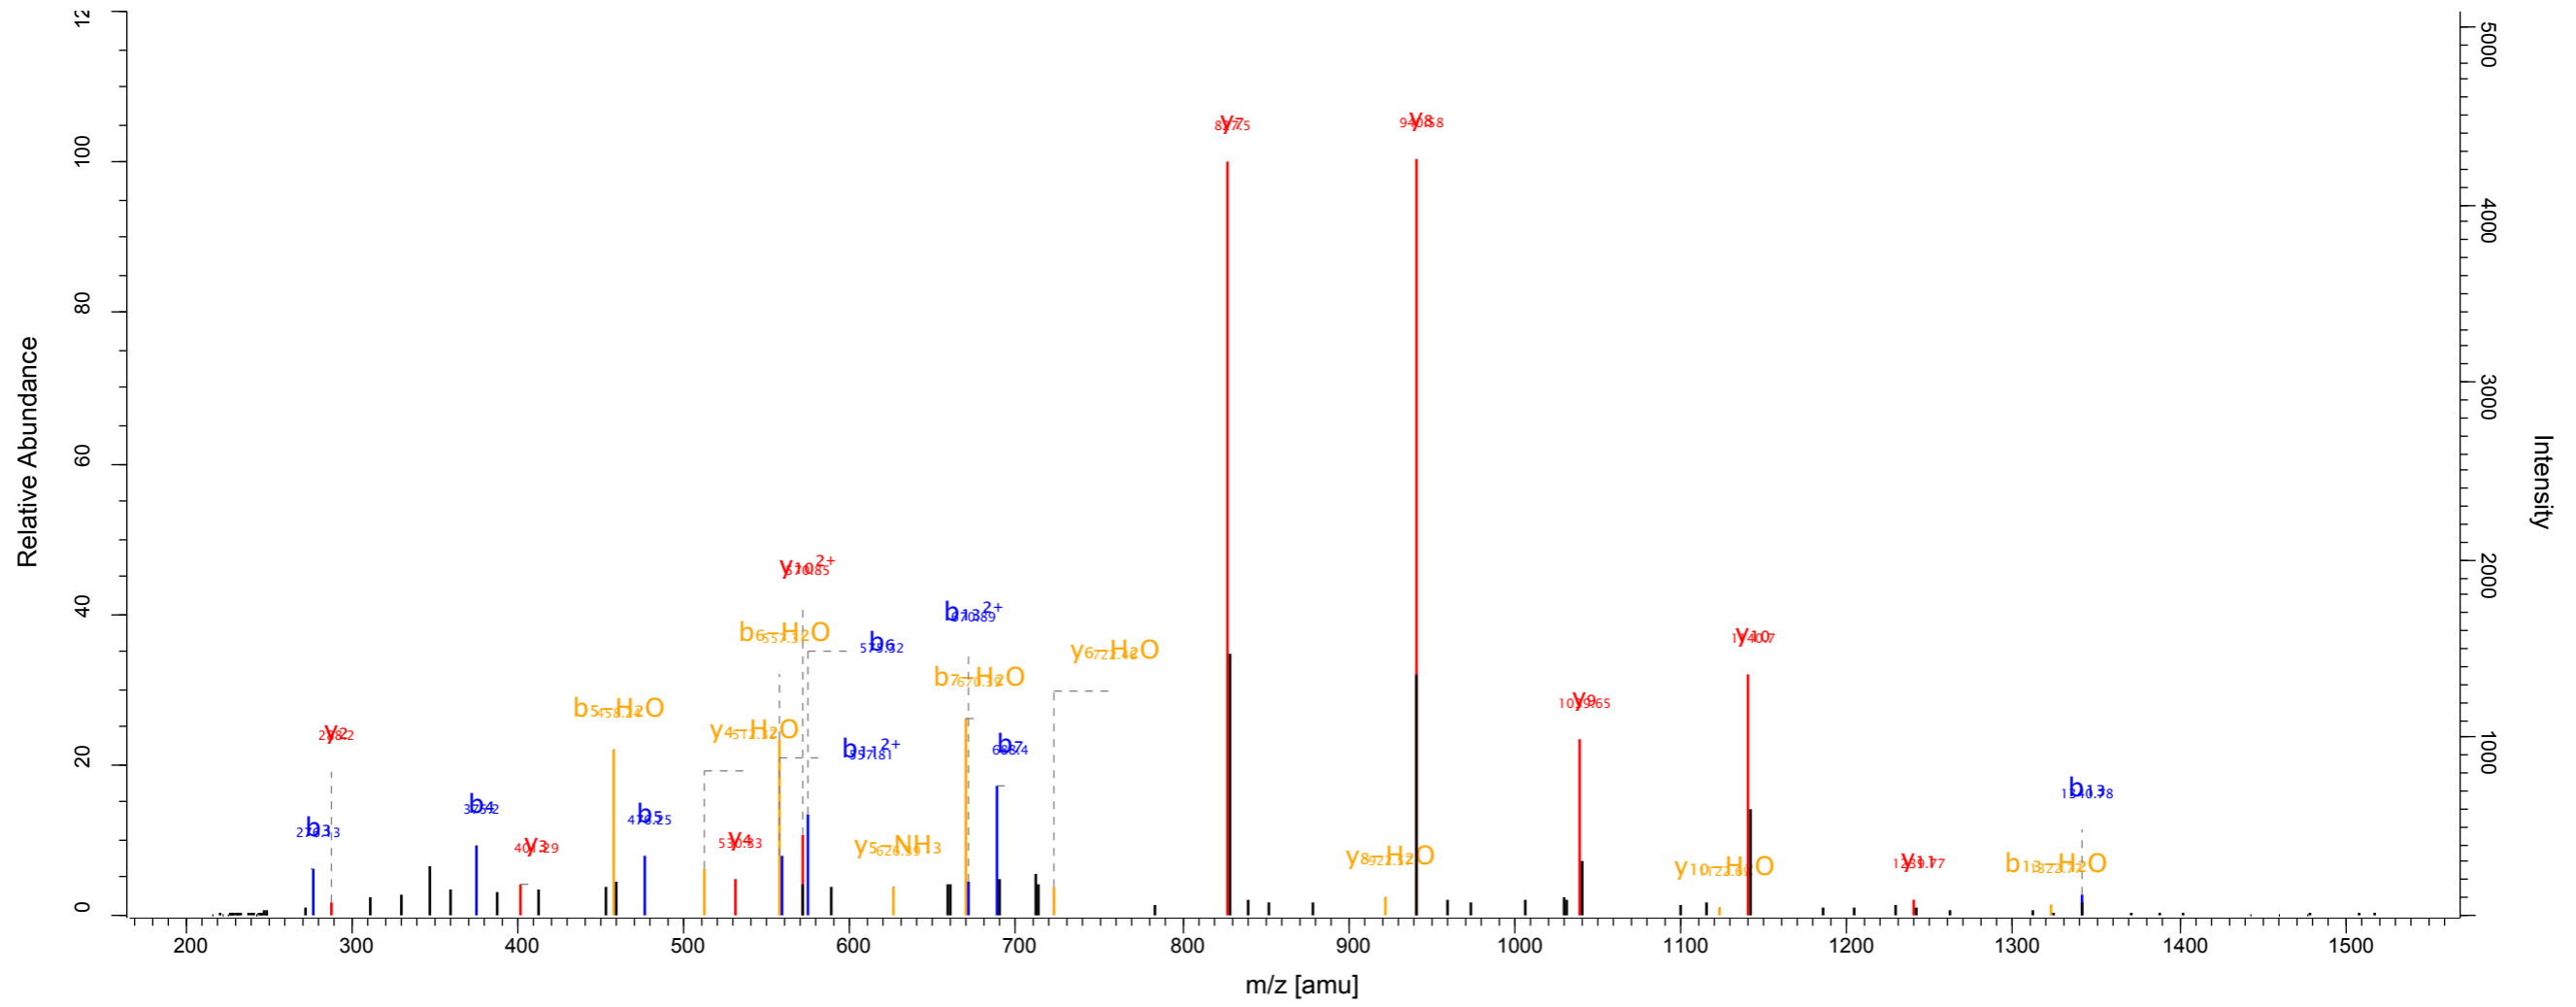

Scan number 10154 Raw file SKaraca\_LMB\_TCE\_Forward\_16\_191011\_rep1  
 Method ITMS; CID Pepti... 248.88

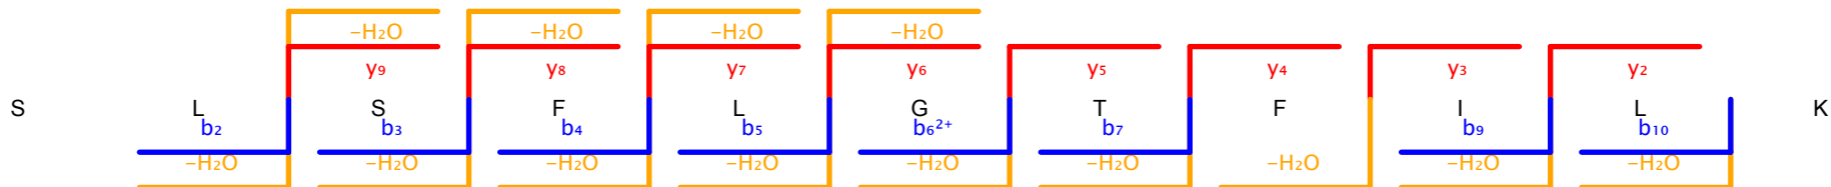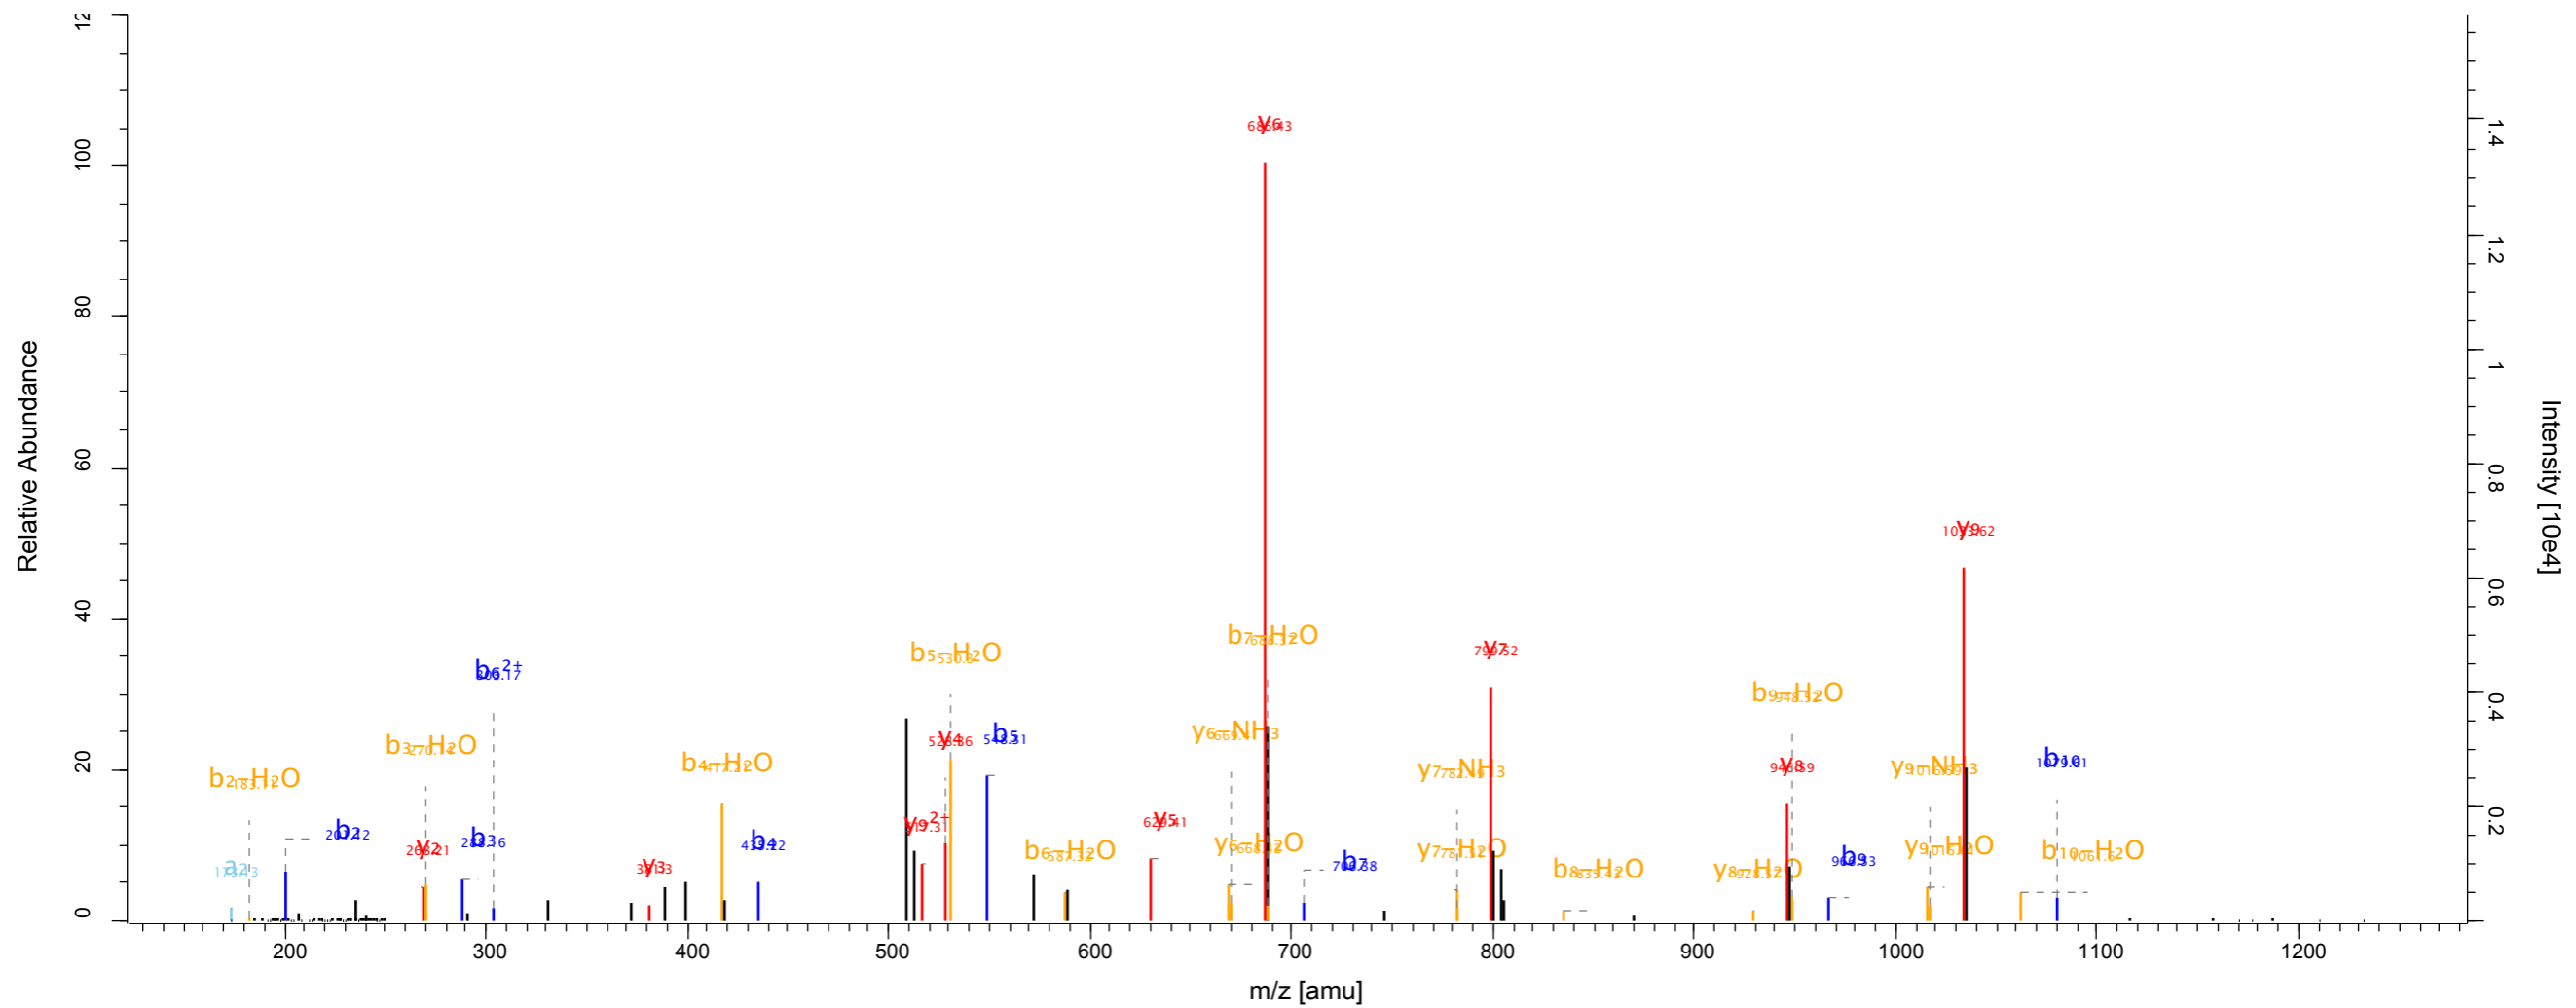



|             |           |          |                                        |
|-------------|-----------|----------|----------------------------------------|
| Scan number | 2661      | Raw file | SKaraca_LMB_TCE_Forward_16_191011_rep1 |
| Method      | ITMS; CID | Pepti... | 162.26                                 |

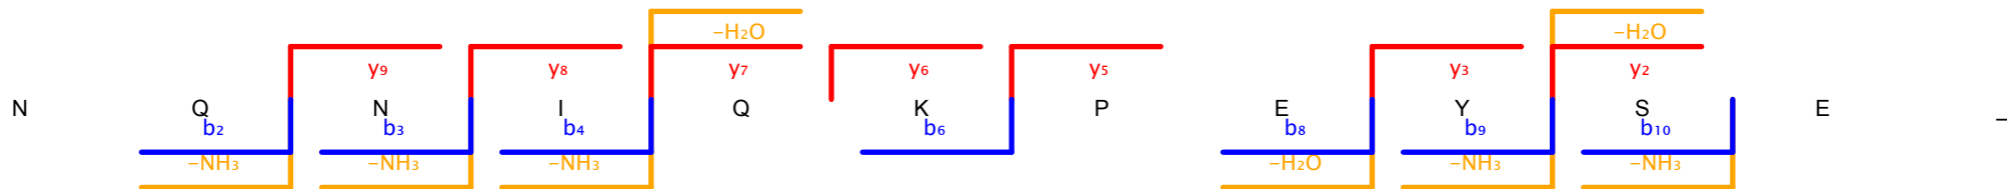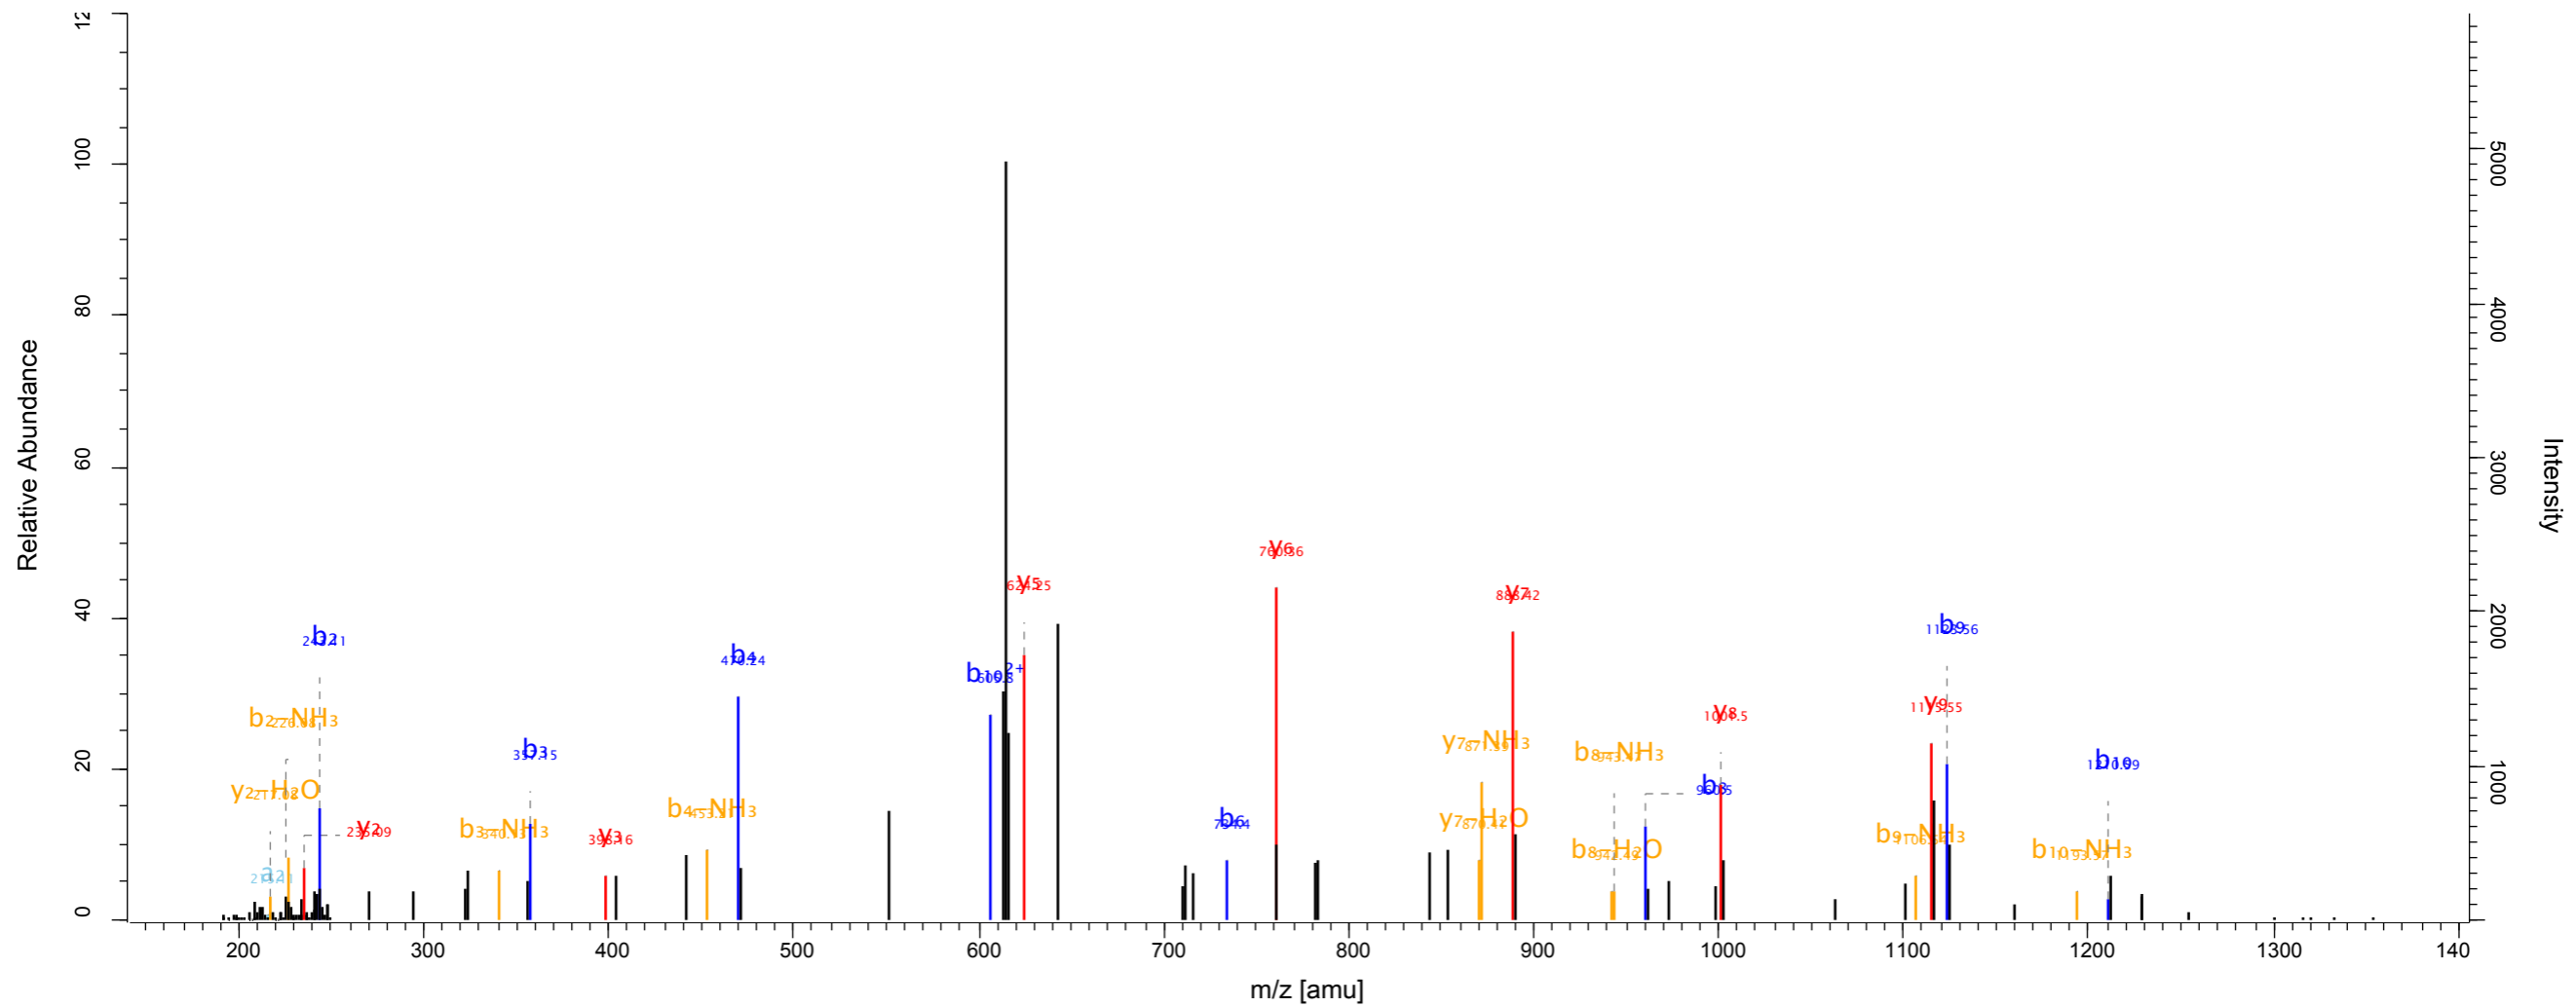

|             |           |          |                                        |
|-------------|-----------|----------|----------------------------------------|
| Scan number | 5315      | Raw file | SKaraca_LMB_TCE_Forward_16_191011_rep1 |
| Method      | ITMS; CID | Pepti... | 130.98                                 |

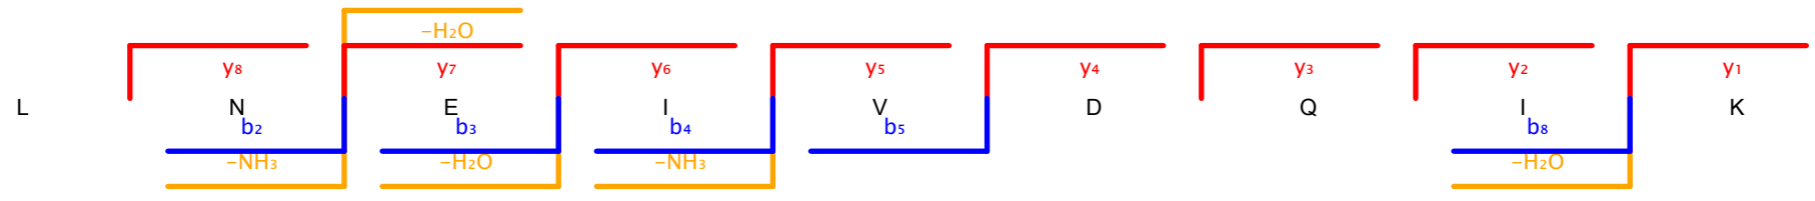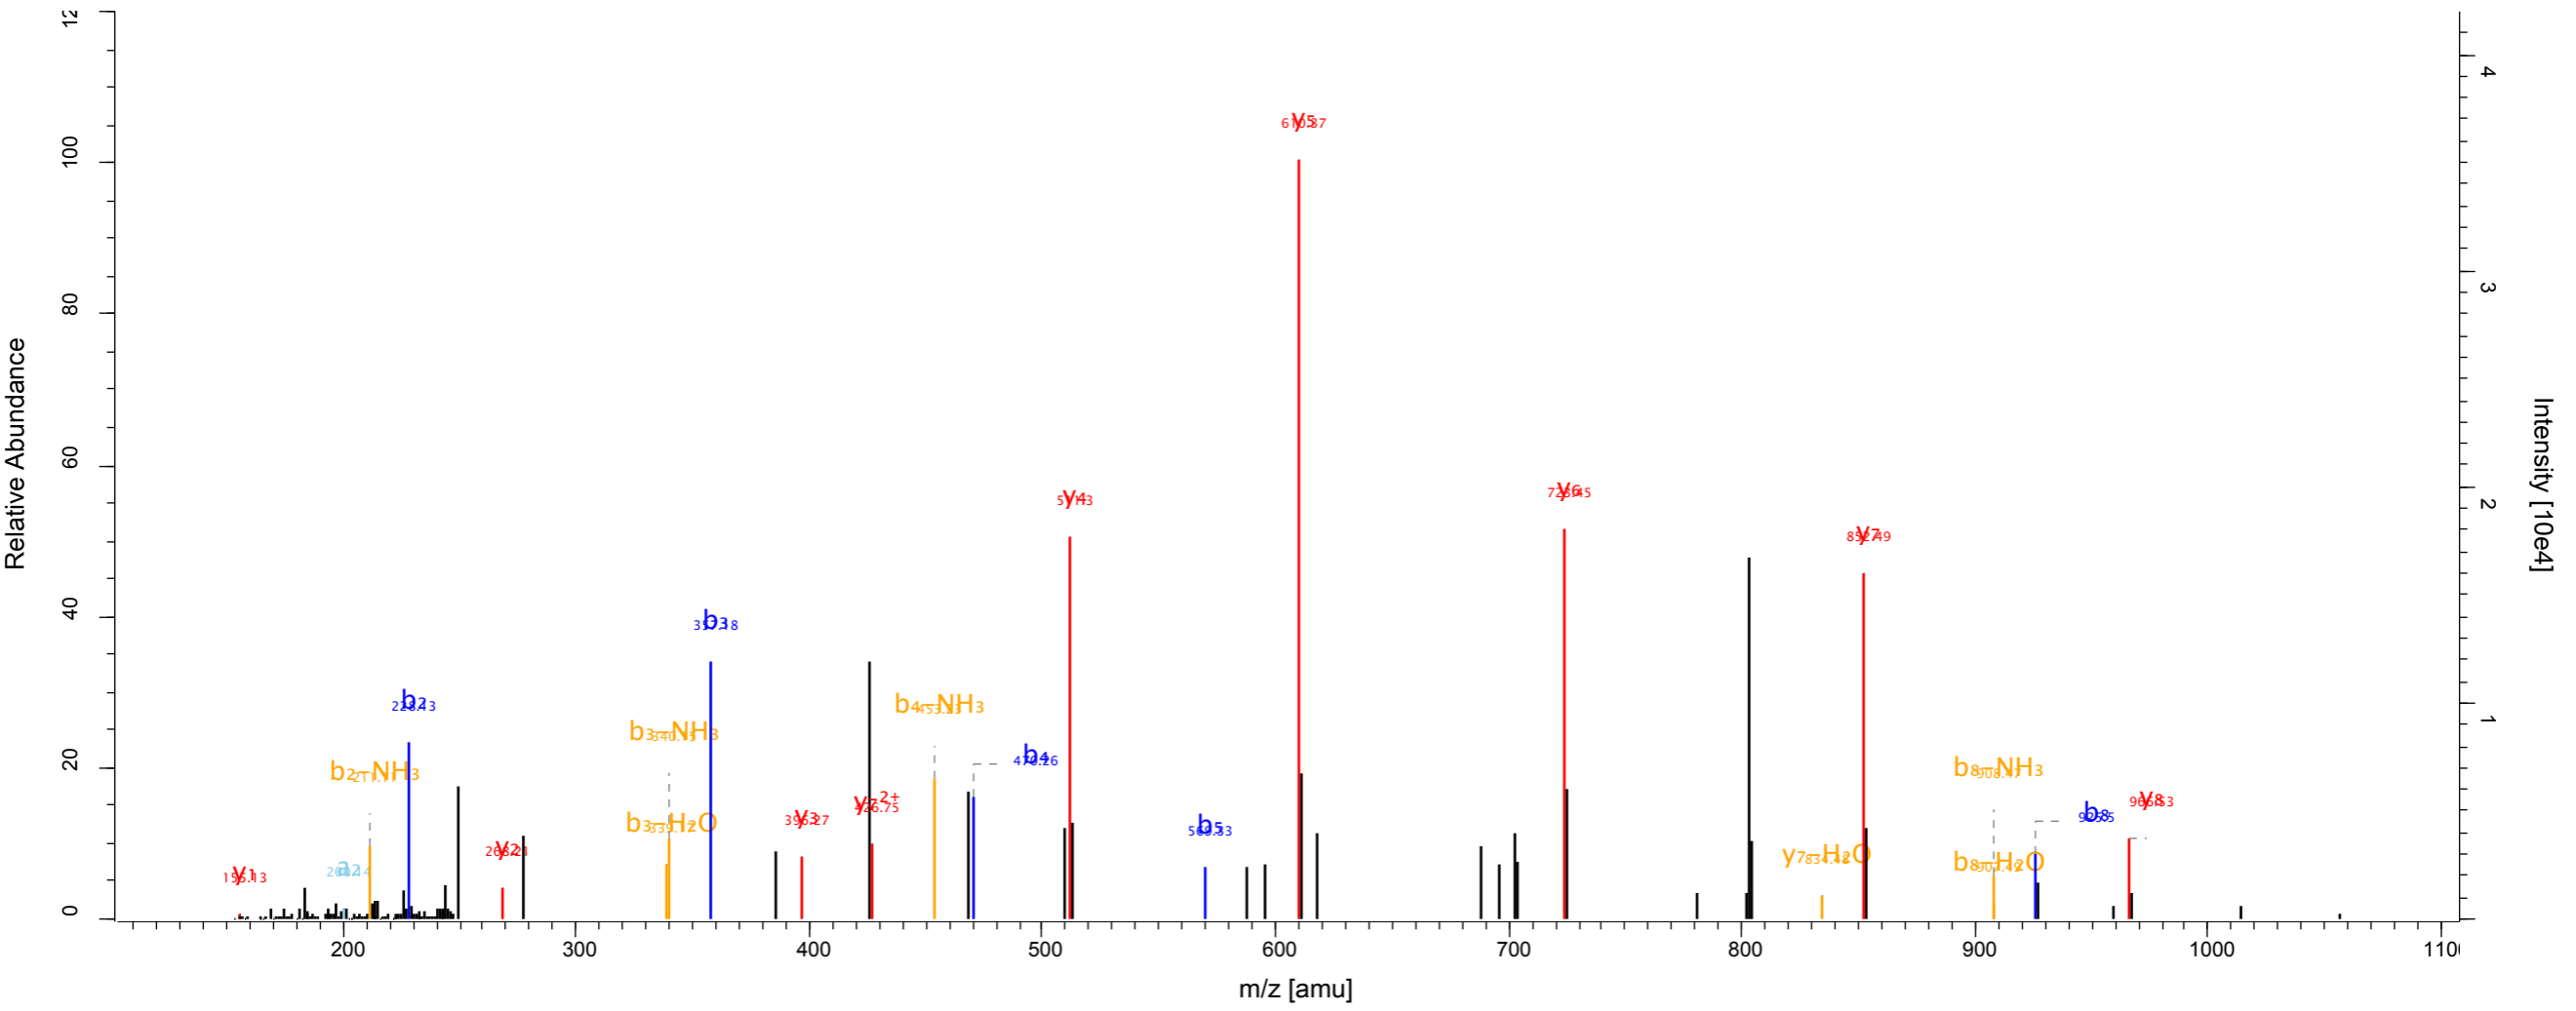

Scan number 8379 Raw file SKaraca\_LMB\_TCE\_Forward\_16\_191011\_rep1  
 Method ITMS; CID Pepti... 174.24

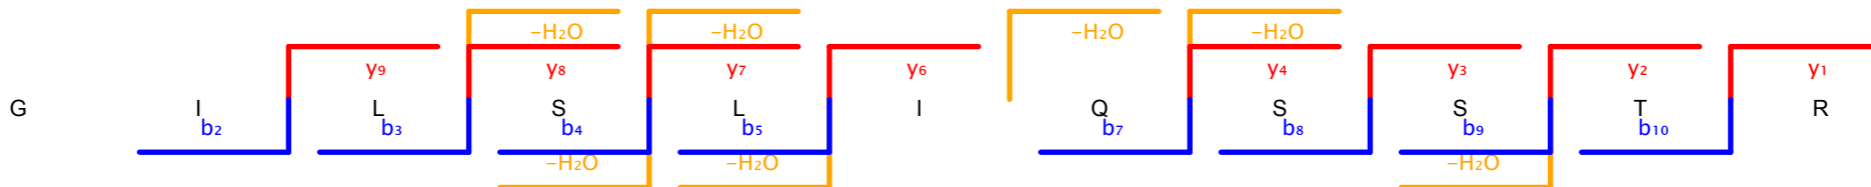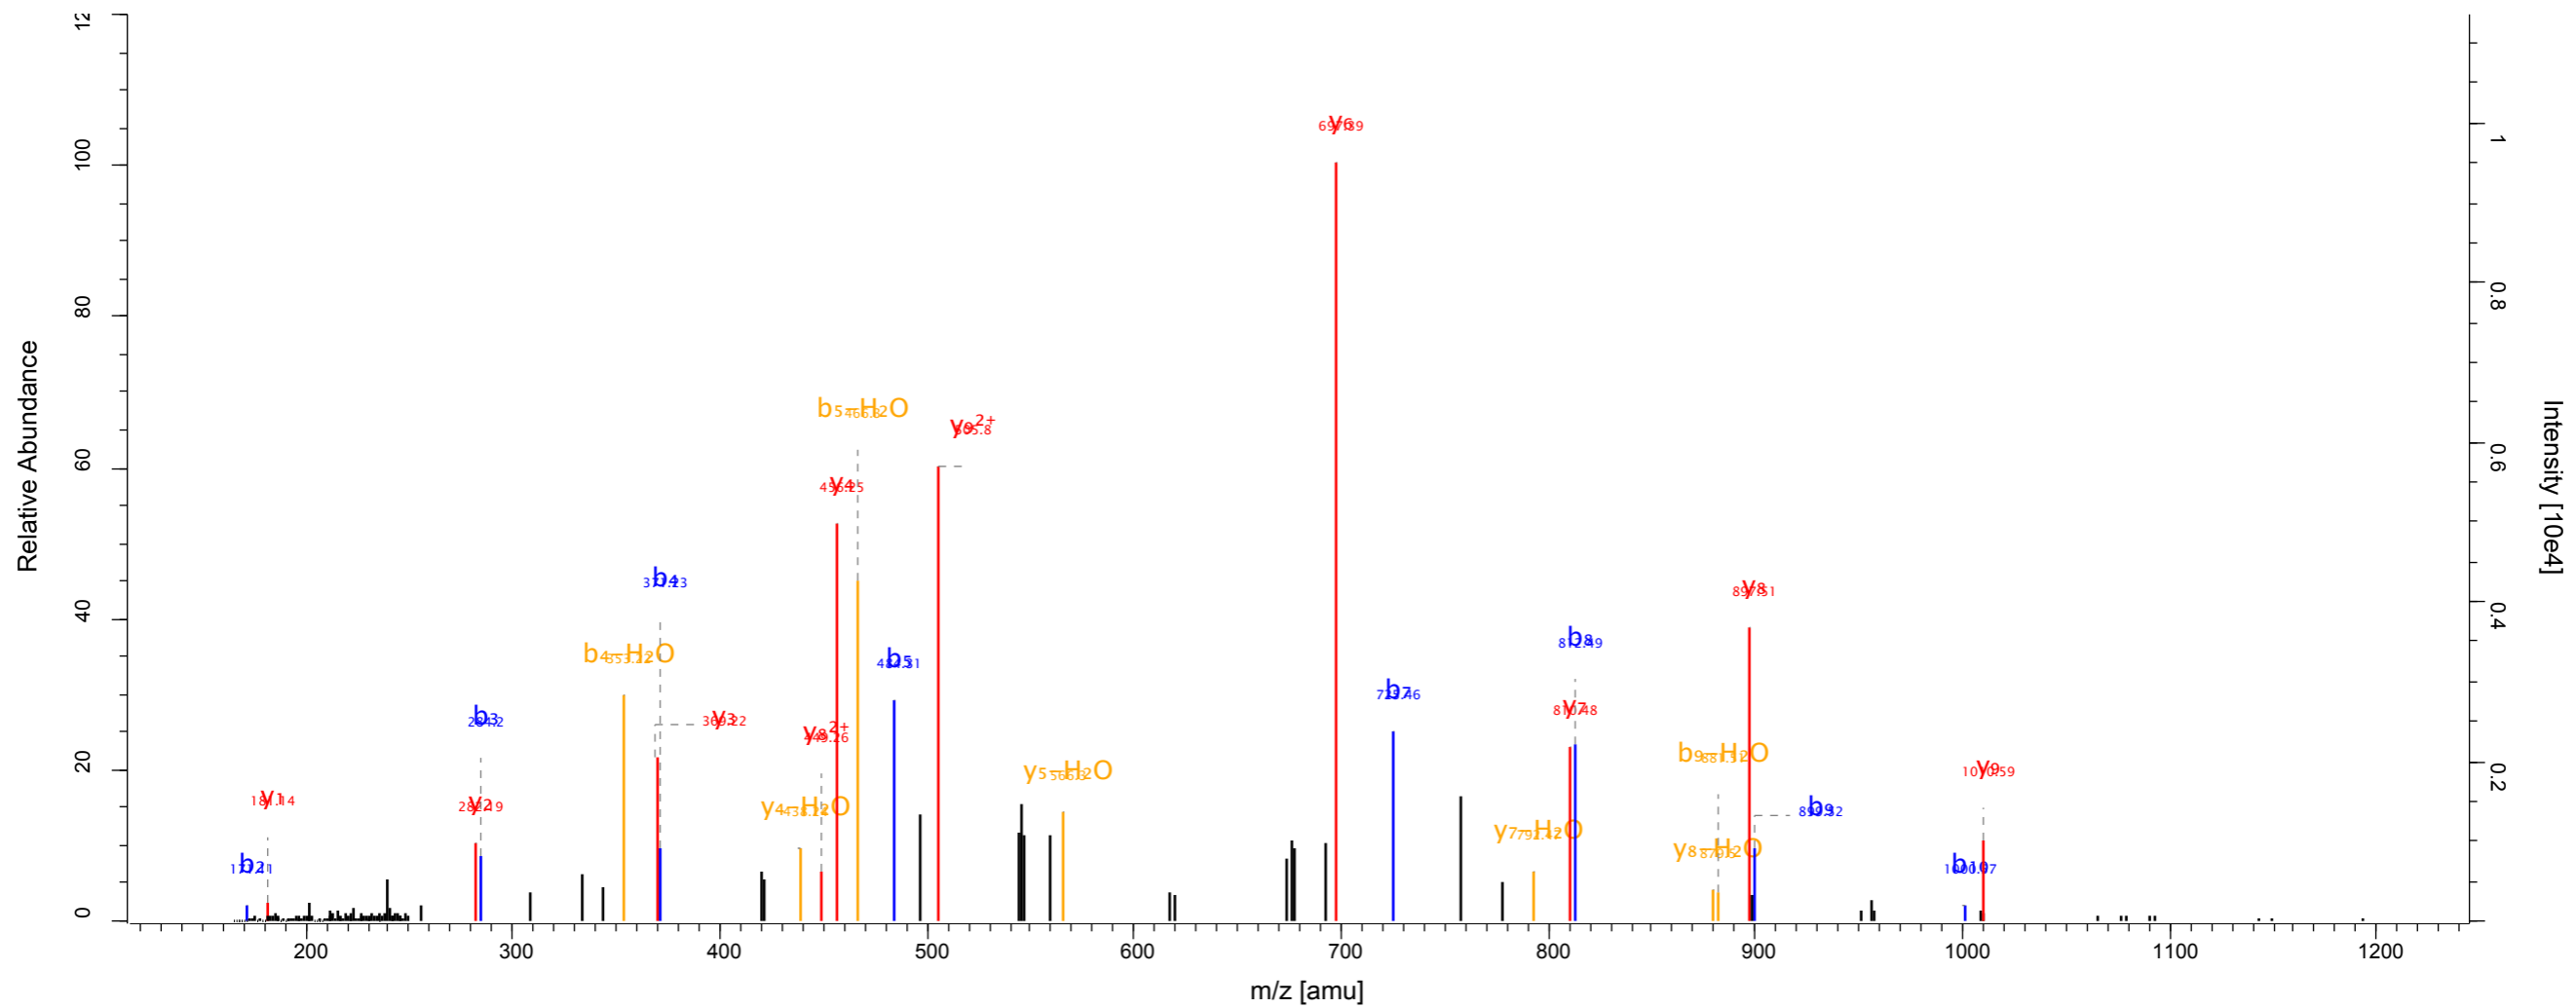

Scan number 8985 Raw file SKaraca\_LMB\_TCE\_Forward\_16\_191011\_rep1  
 Method ITMS; CID Pepti... 169.65

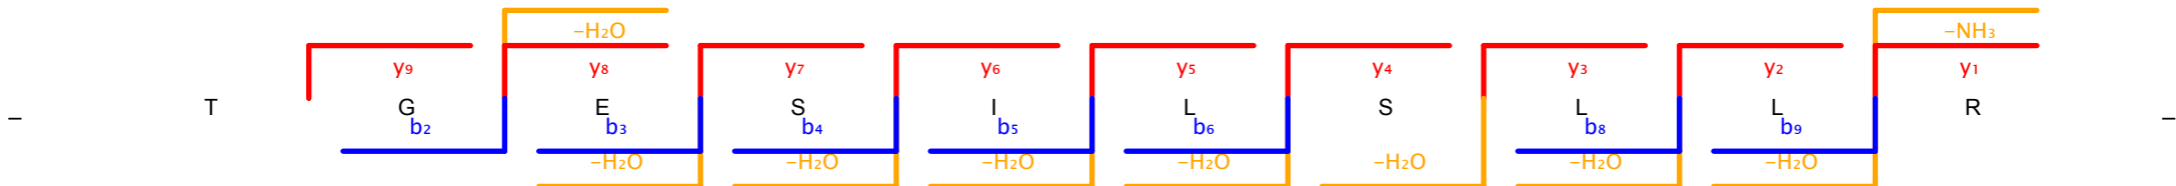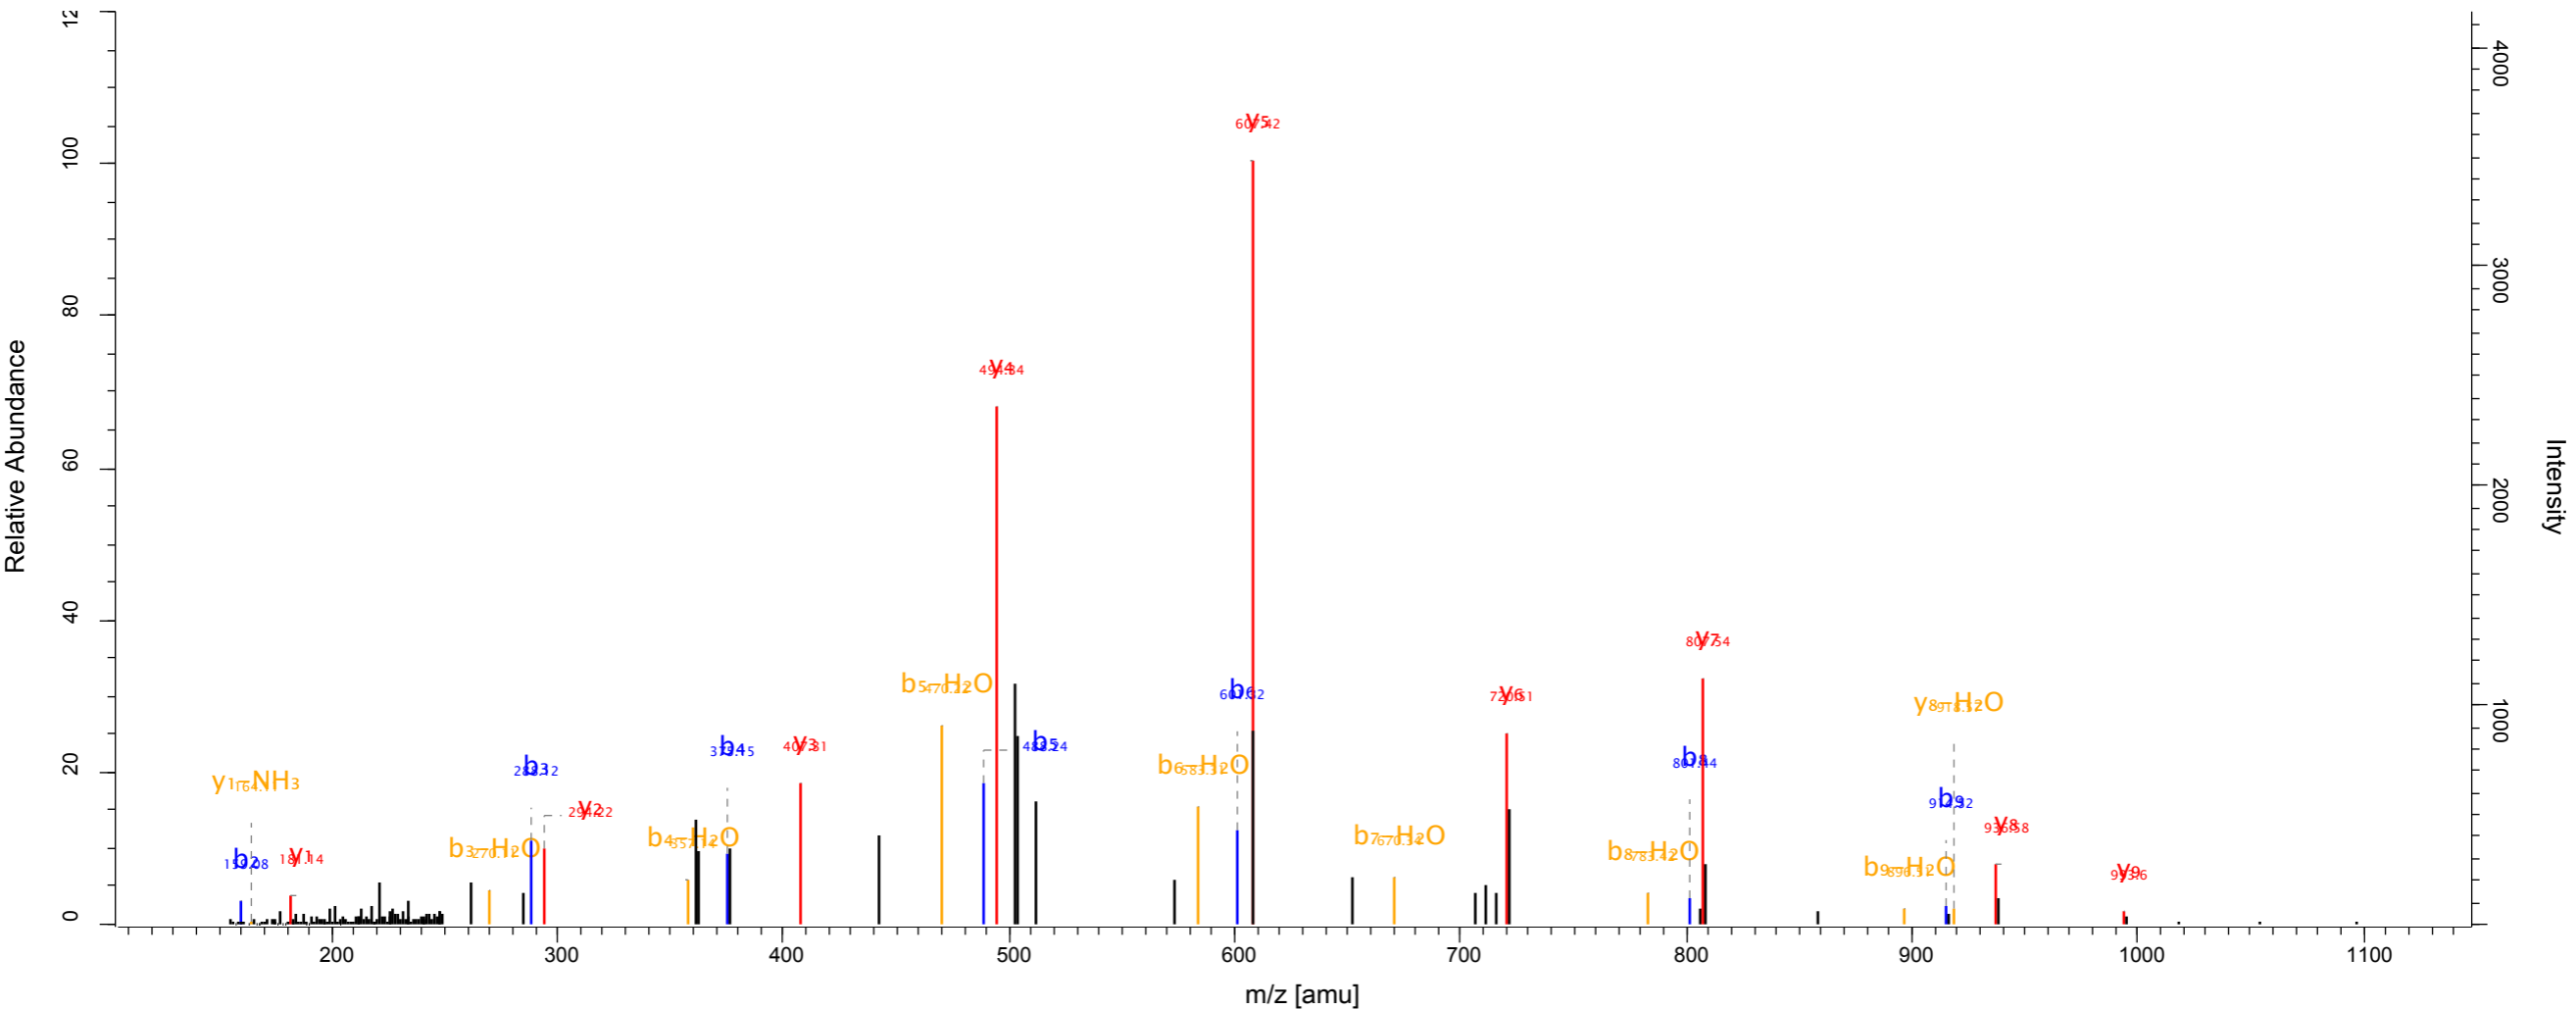

Scan number 9408 Raw file SKaraca\_LMB\_TCE\_Forward\_16\_191011\_rep1  
Method ITMS; CID Pepti... 206.06

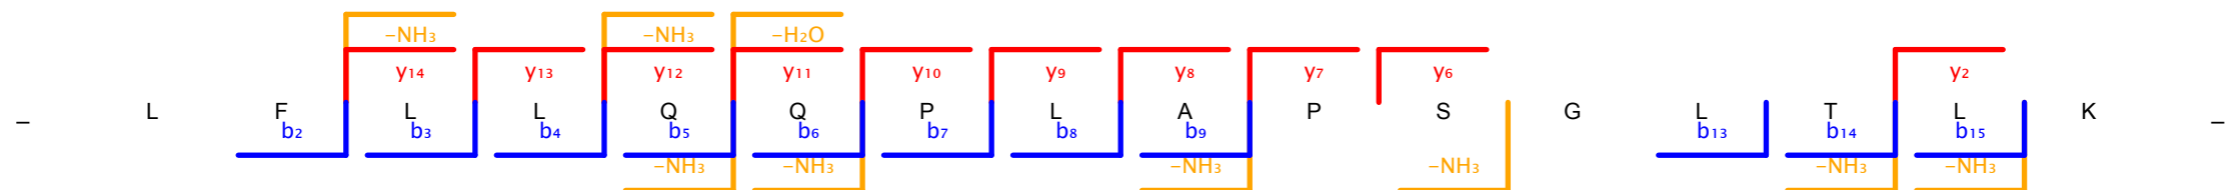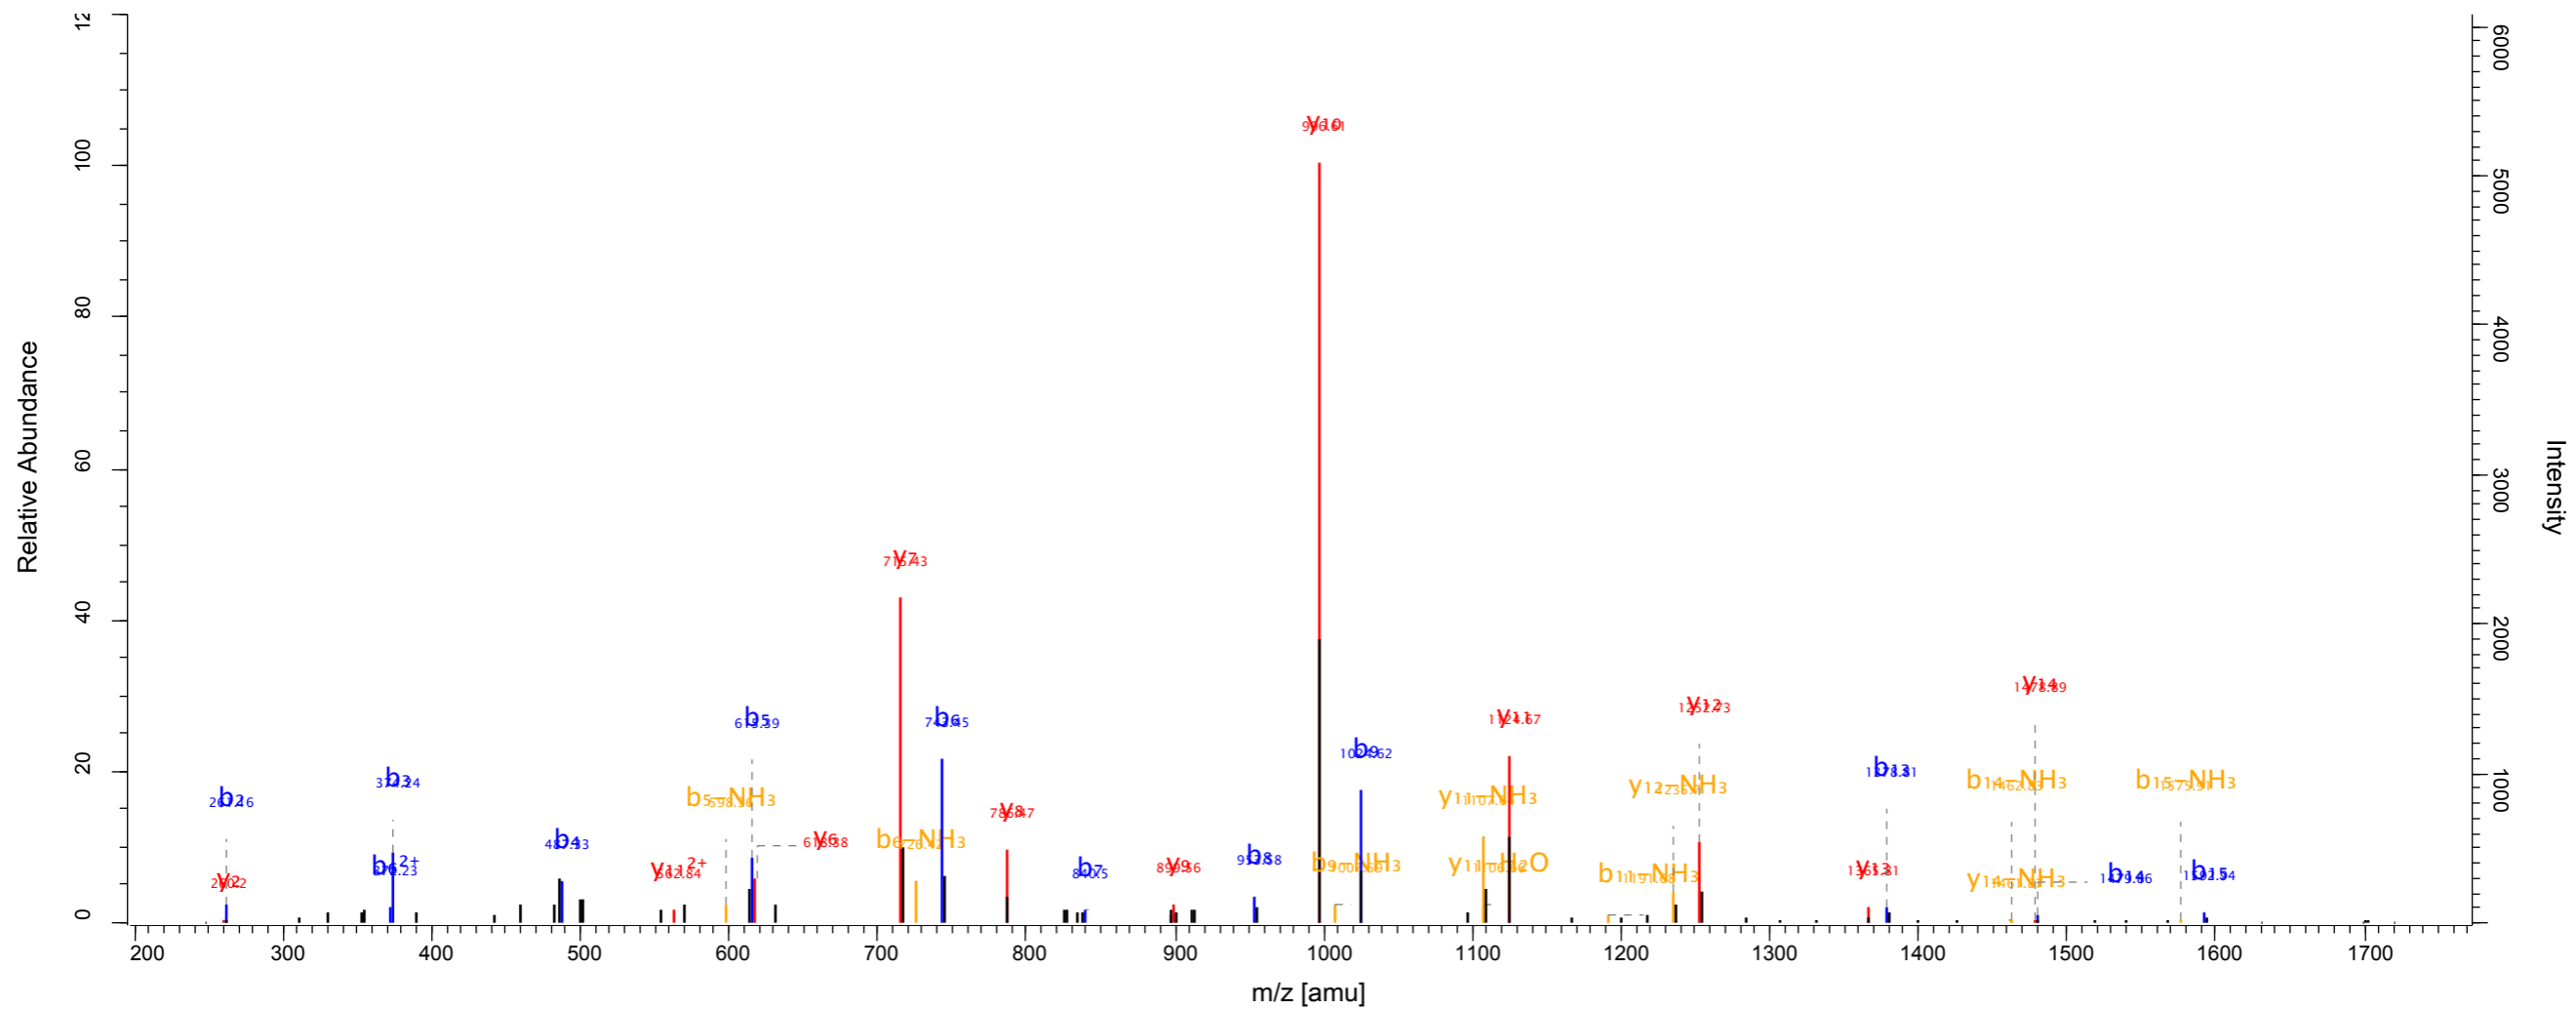

Scan number 9903 Raw file SKaraca\_LMB\_TCE\_Forward\_16\_191011\_rep1  
 Method ITMS; CID Pepti... 110.31

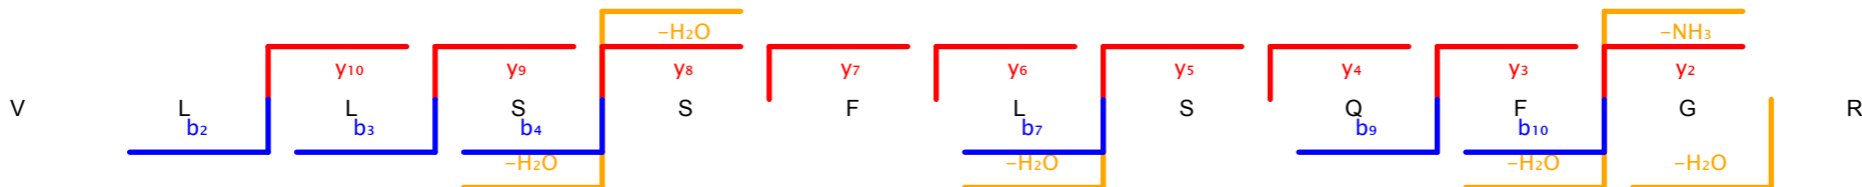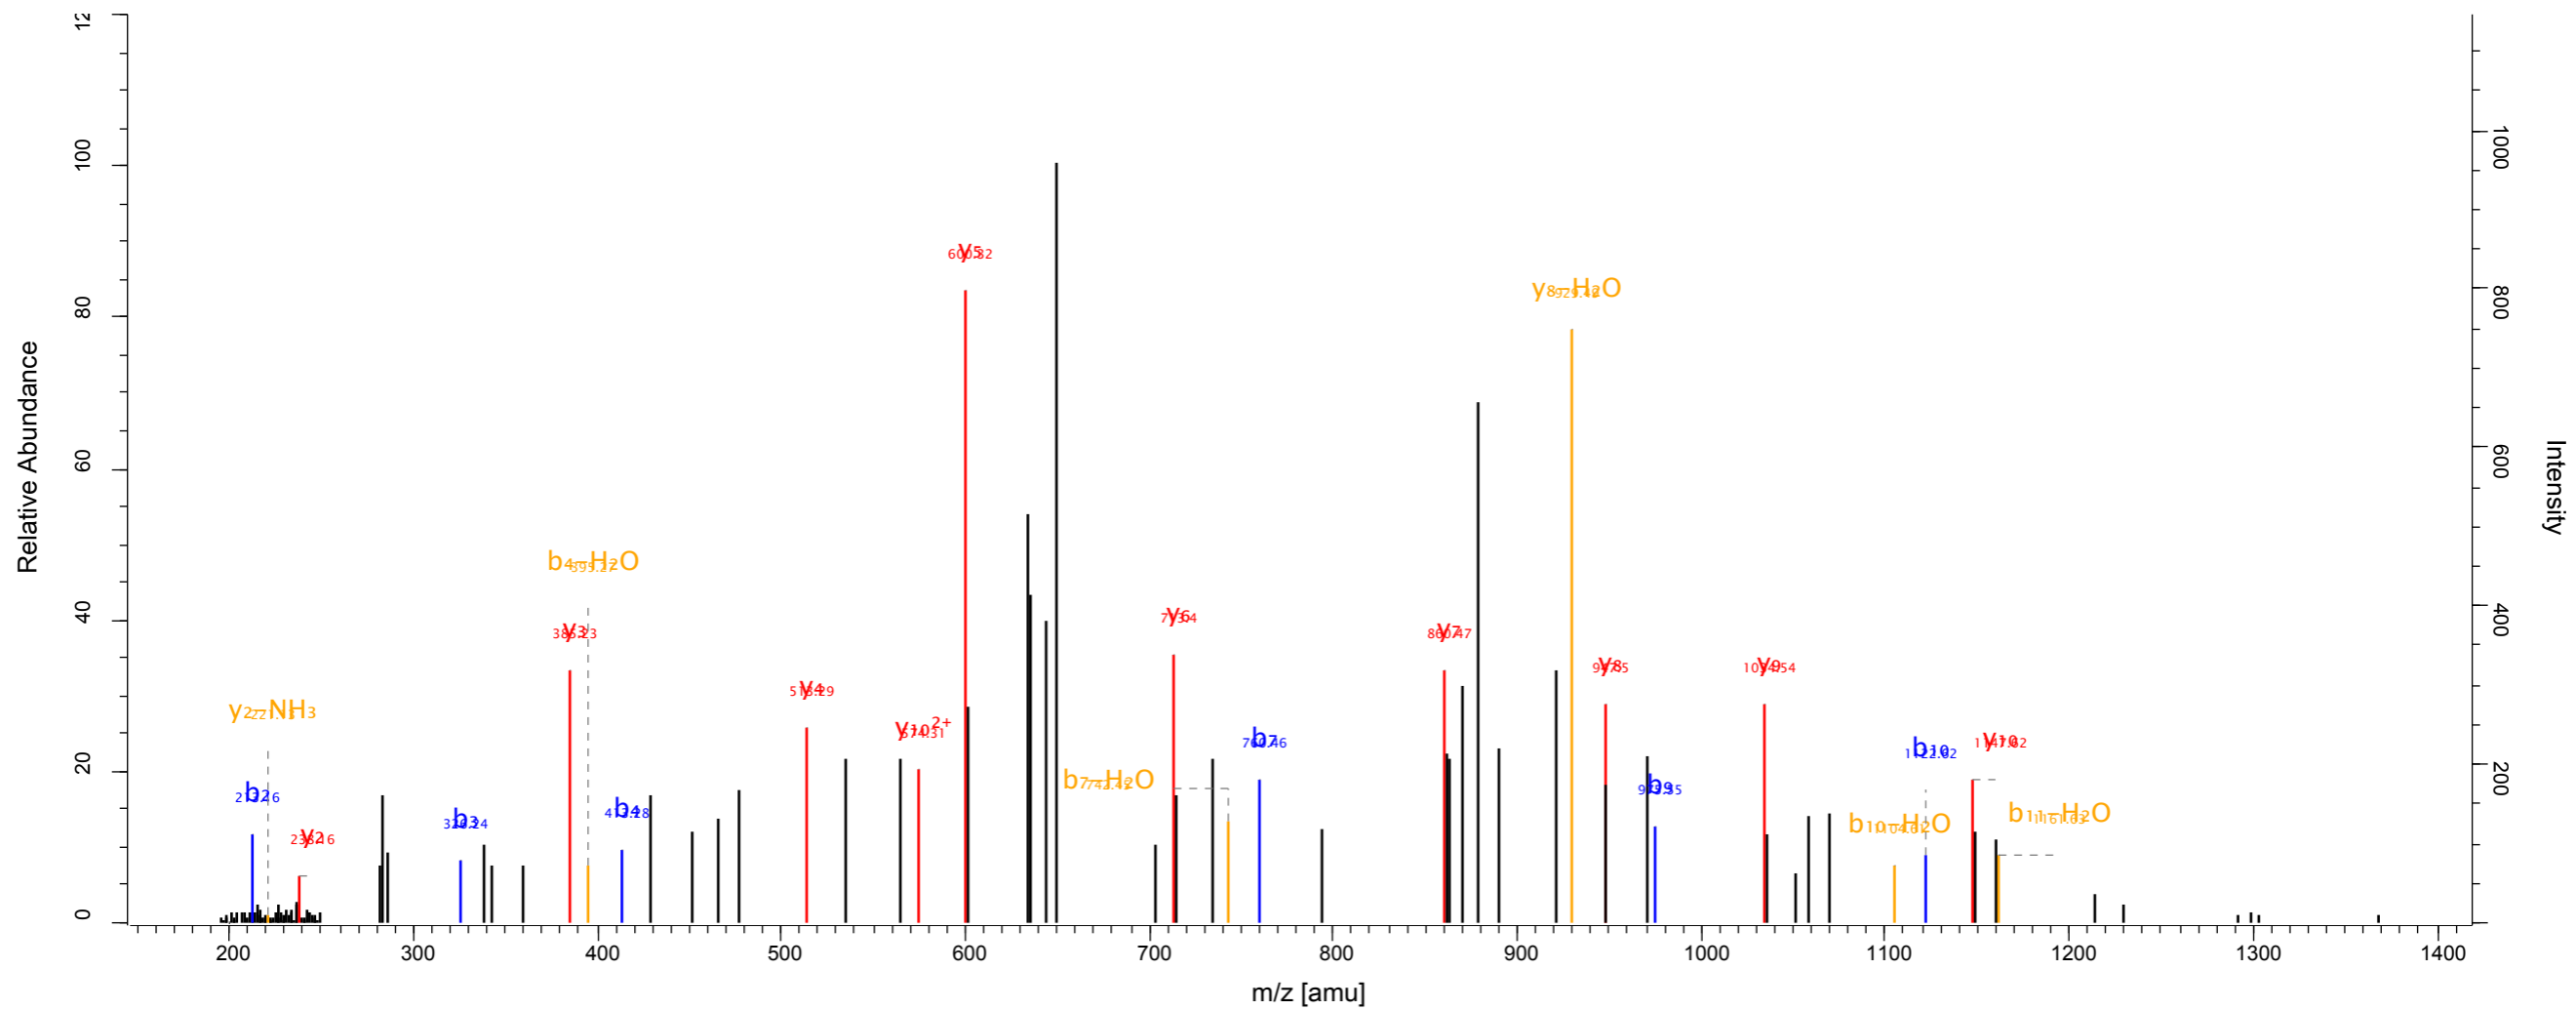

Scan number 6486 Raw file SKaraca\_LMB\_TCE\_Forward\_16\_191011\_rep2  
Method ITMS; CID Pepti... 268.93

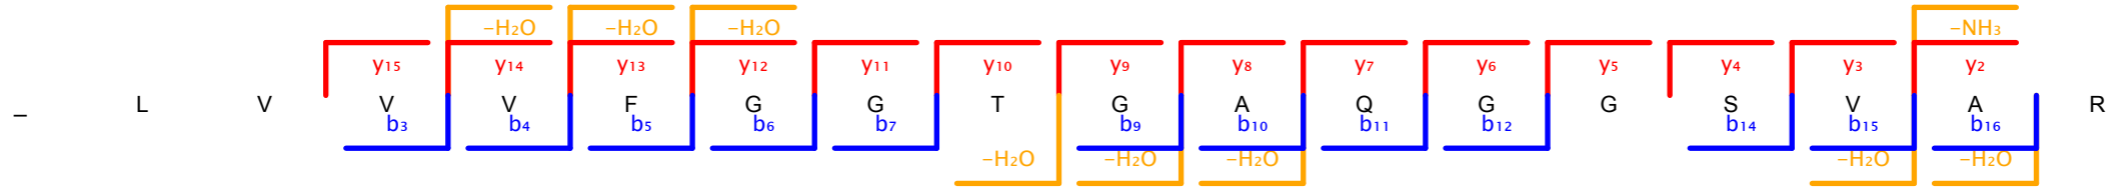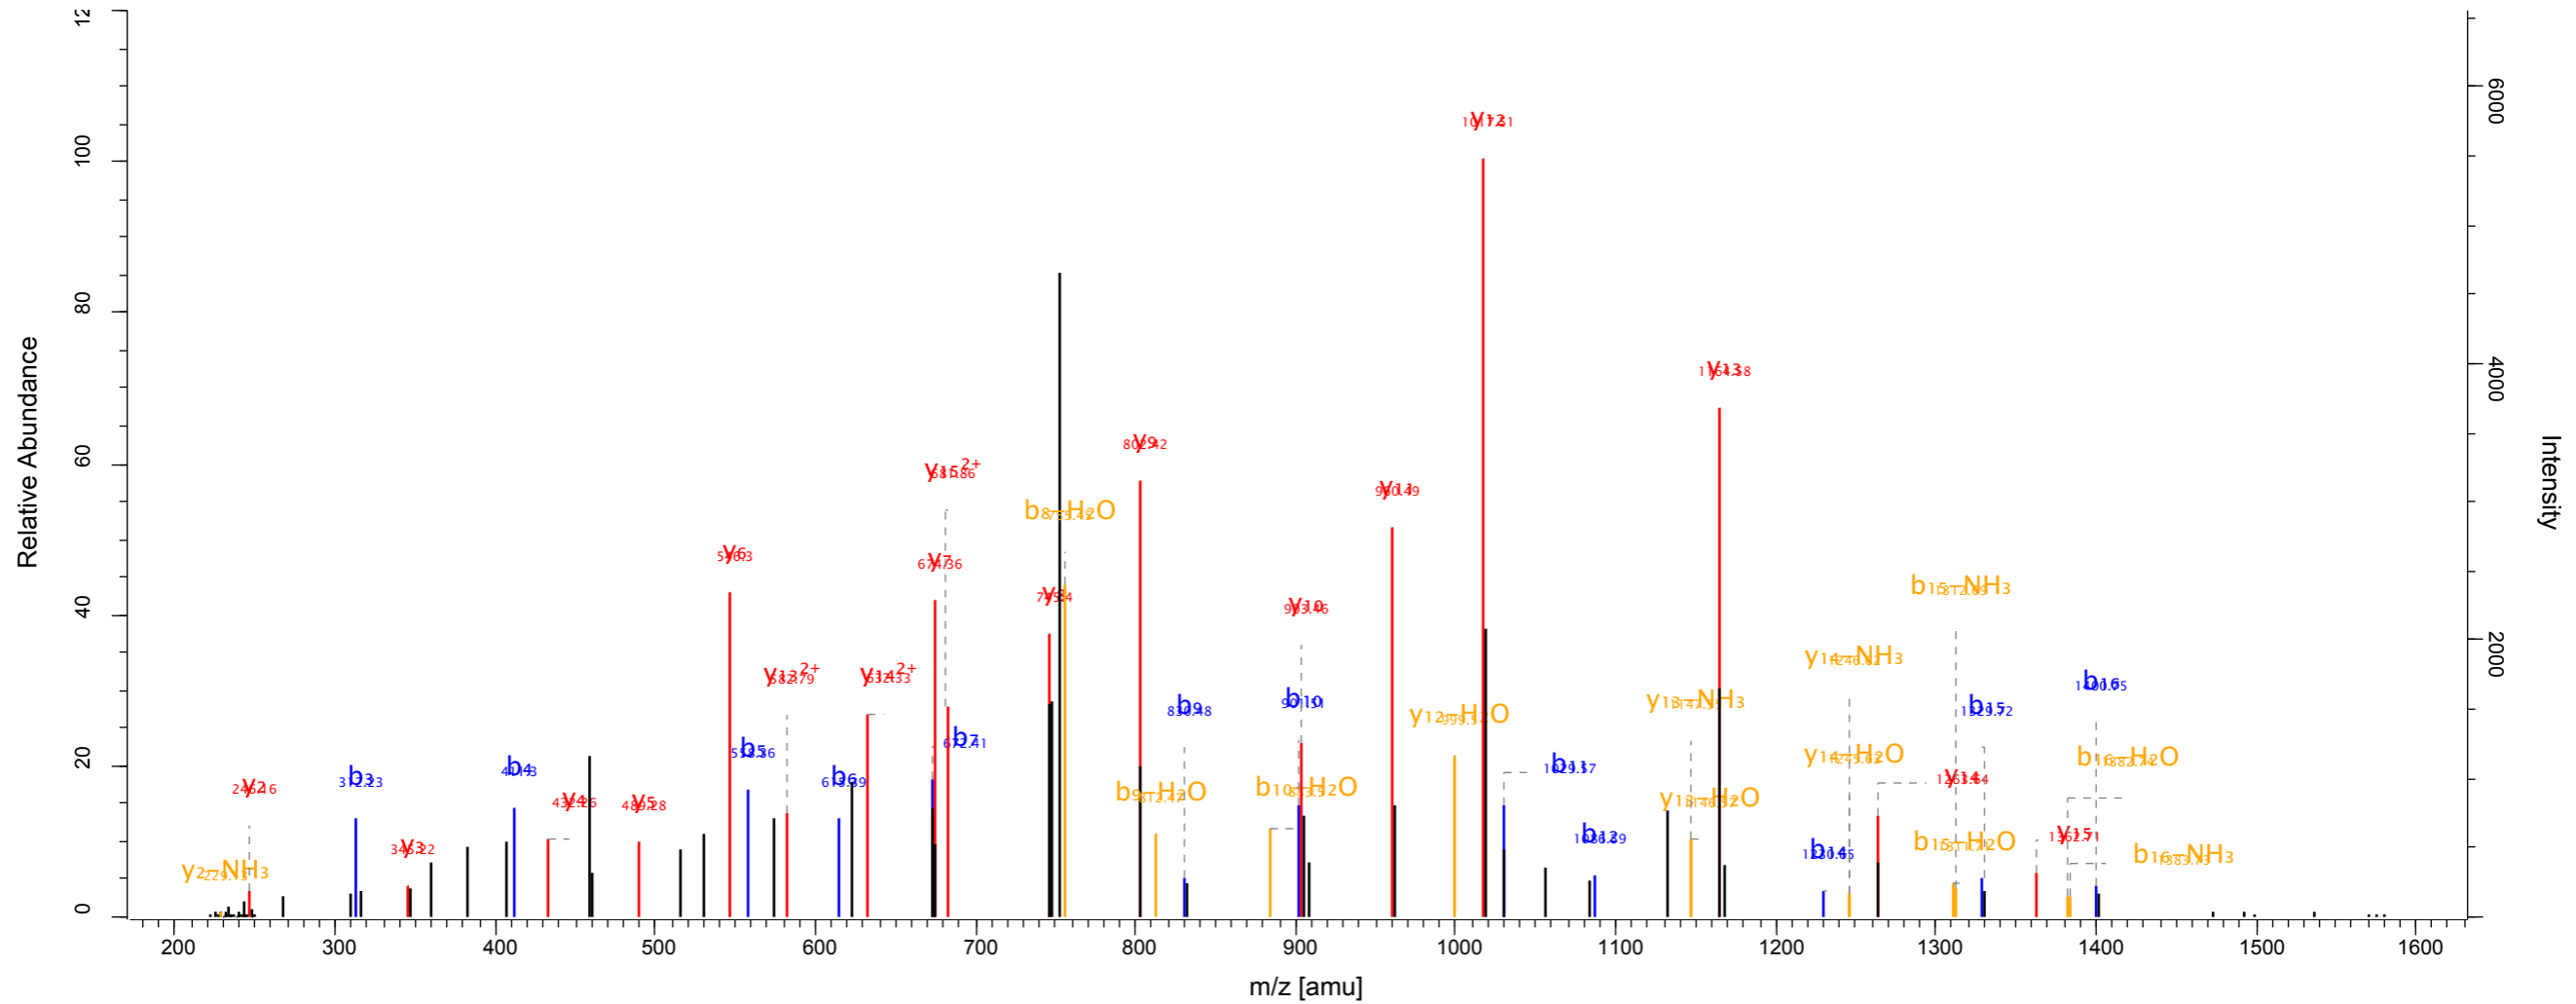

|             |           |          |                                        |
|-------------|-----------|----------|----------------------------------------|
| Scan number | 5937      | Raw file | SKaraca_LMB_TCE_Forward_16_191011_rep3 |
| Method      | ITMS; CID | Pepti... | 142.83                                 |

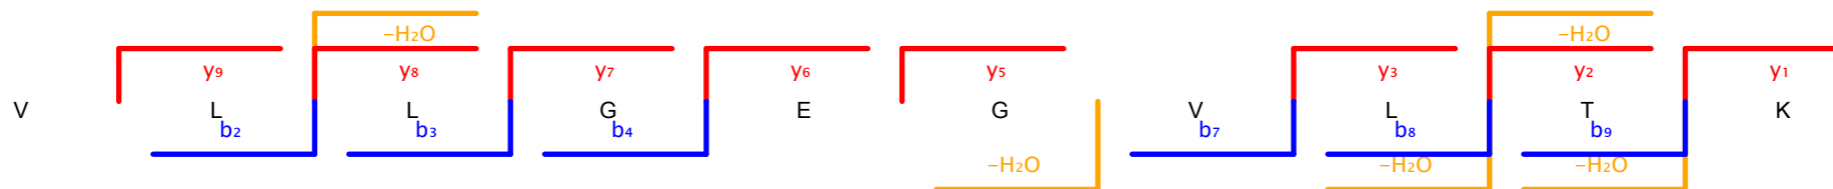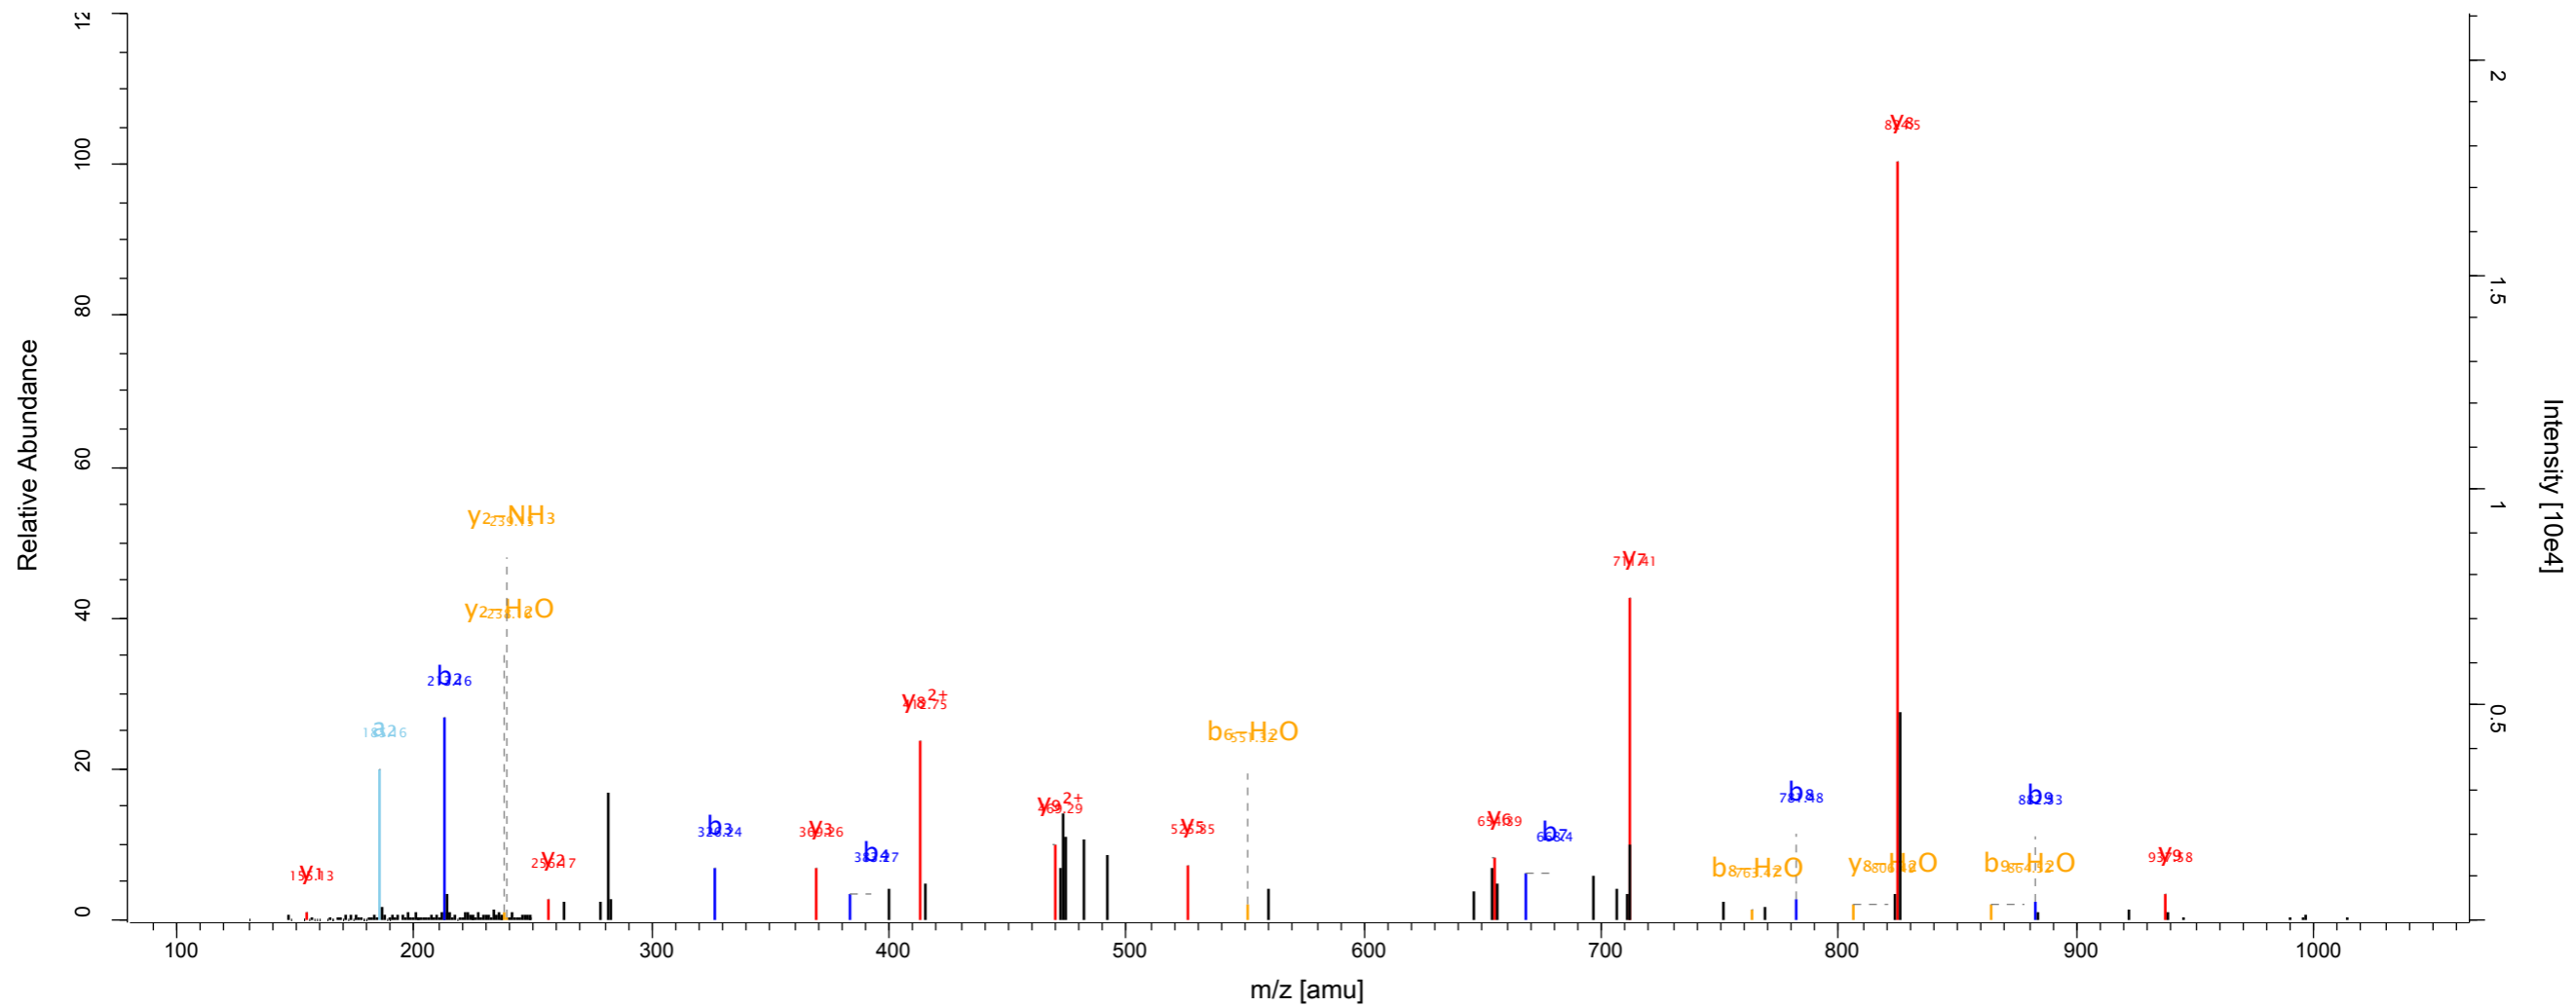



Scan number 7066 Raw file SKaraca\_LMB\_TCE\_Forward\_16\_191011\_rep3  
 Method ITMS; CID Pepti... 257.95

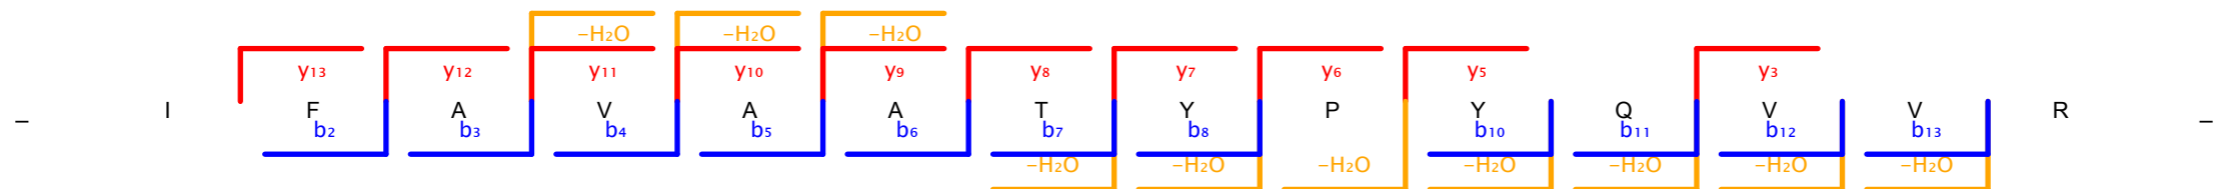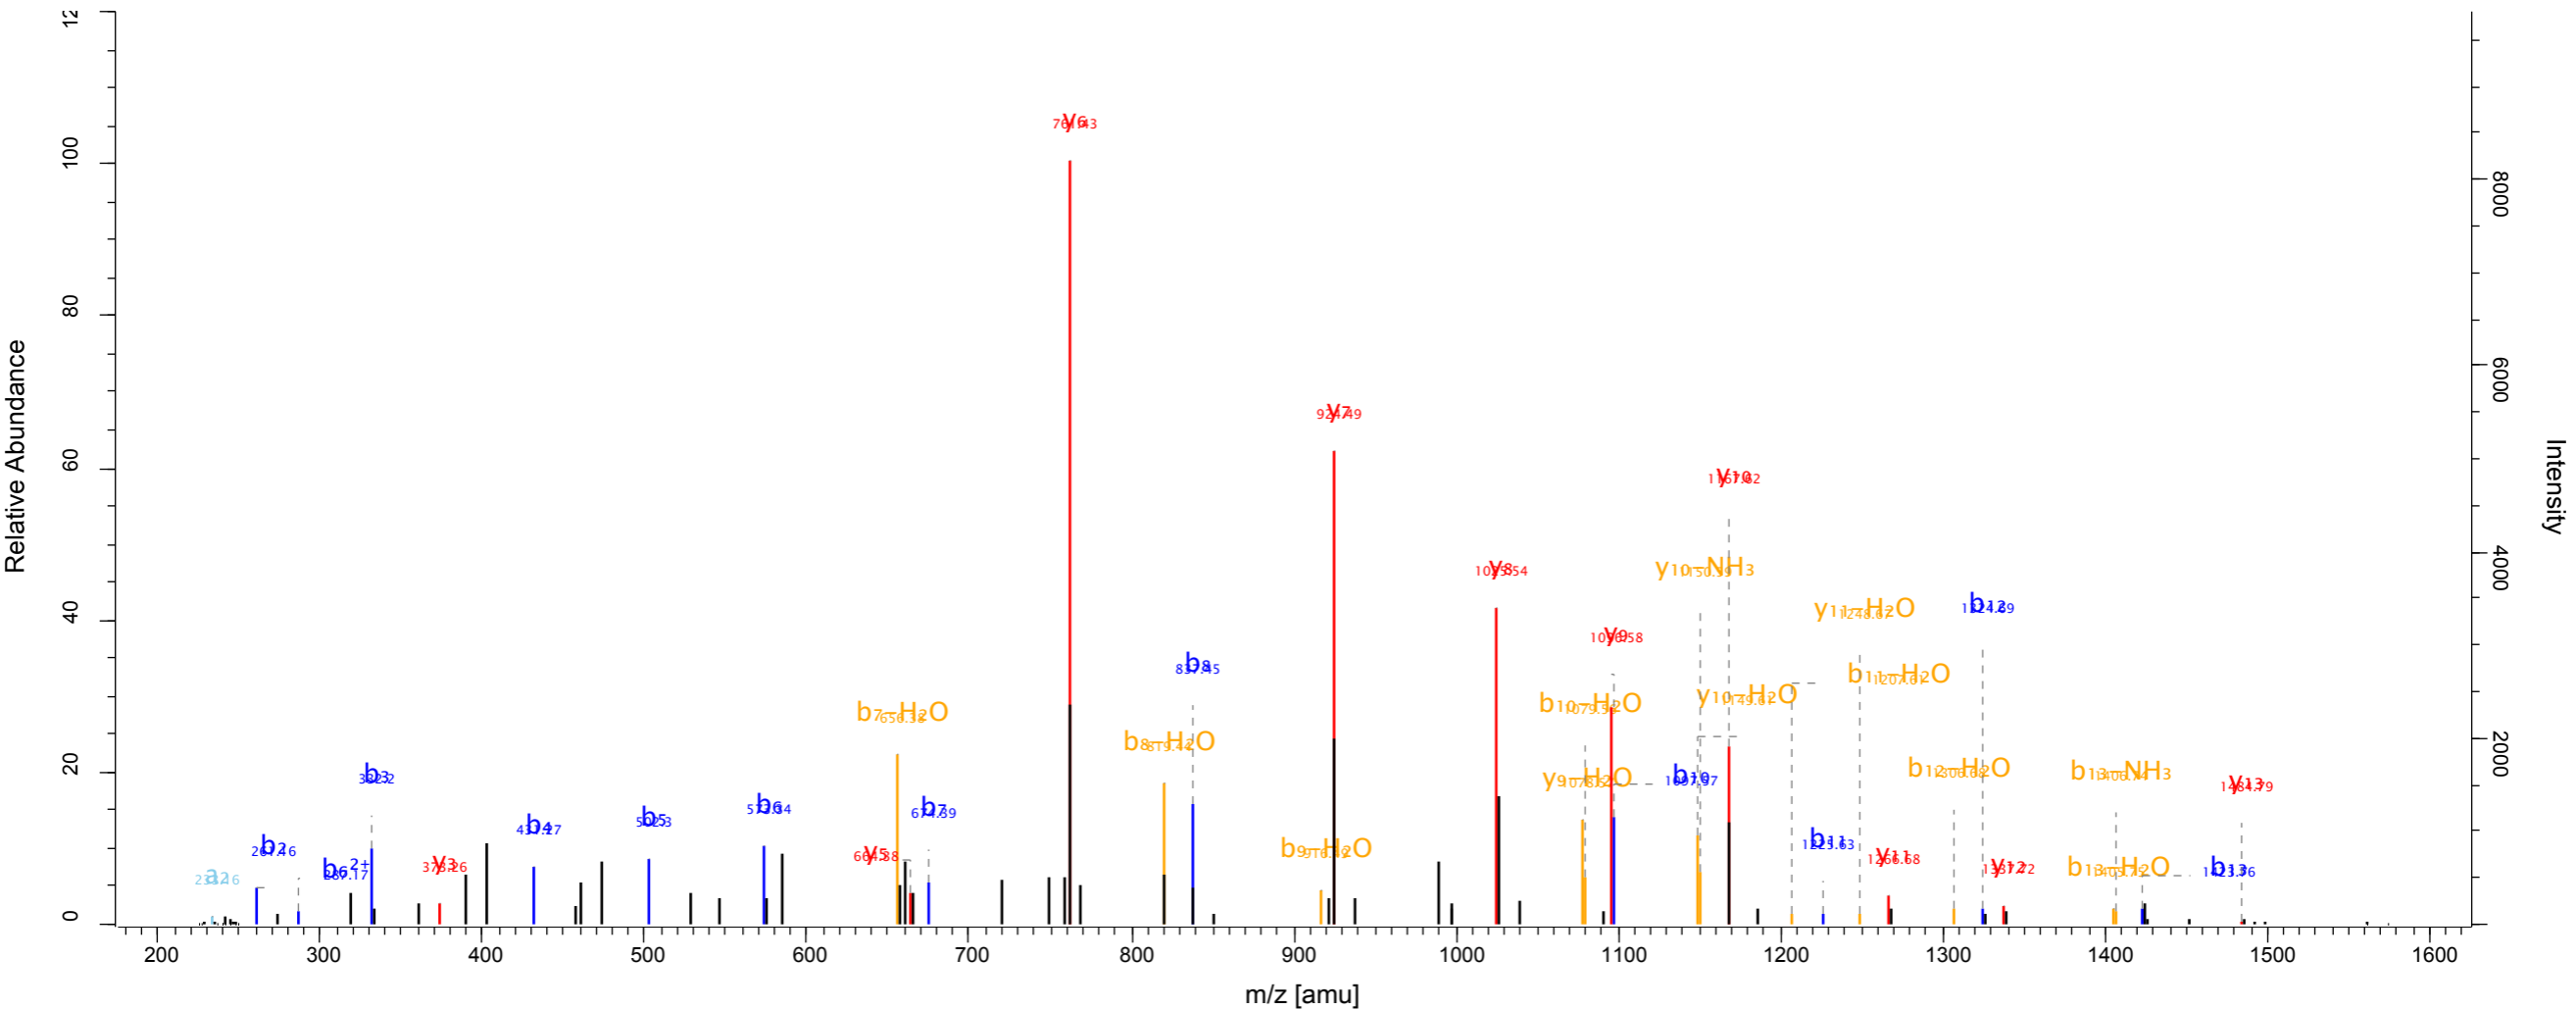

|             |           |          |                                        |
|-------------|-----------|----------|----------------------------------------|
| Scan number | 1566      | Raw file | SKaraca_LMB_TCE_Forward_17_191011_rep1 |
| Method      | ITMS; CID | Pepti... | 160.38                                 |

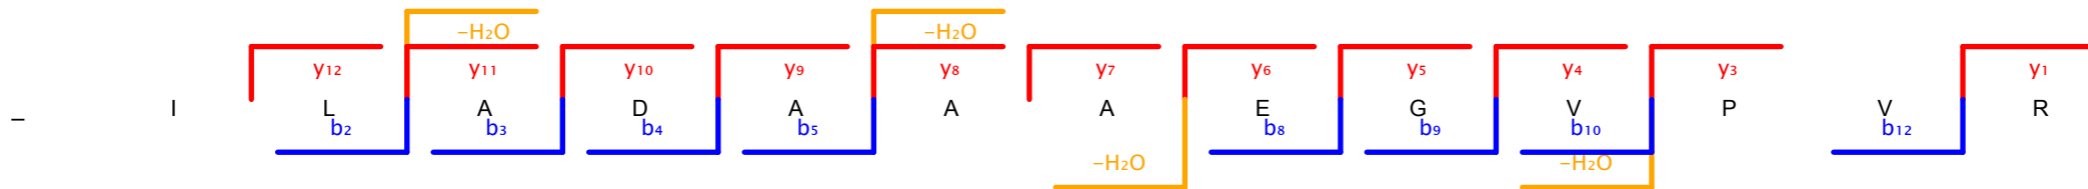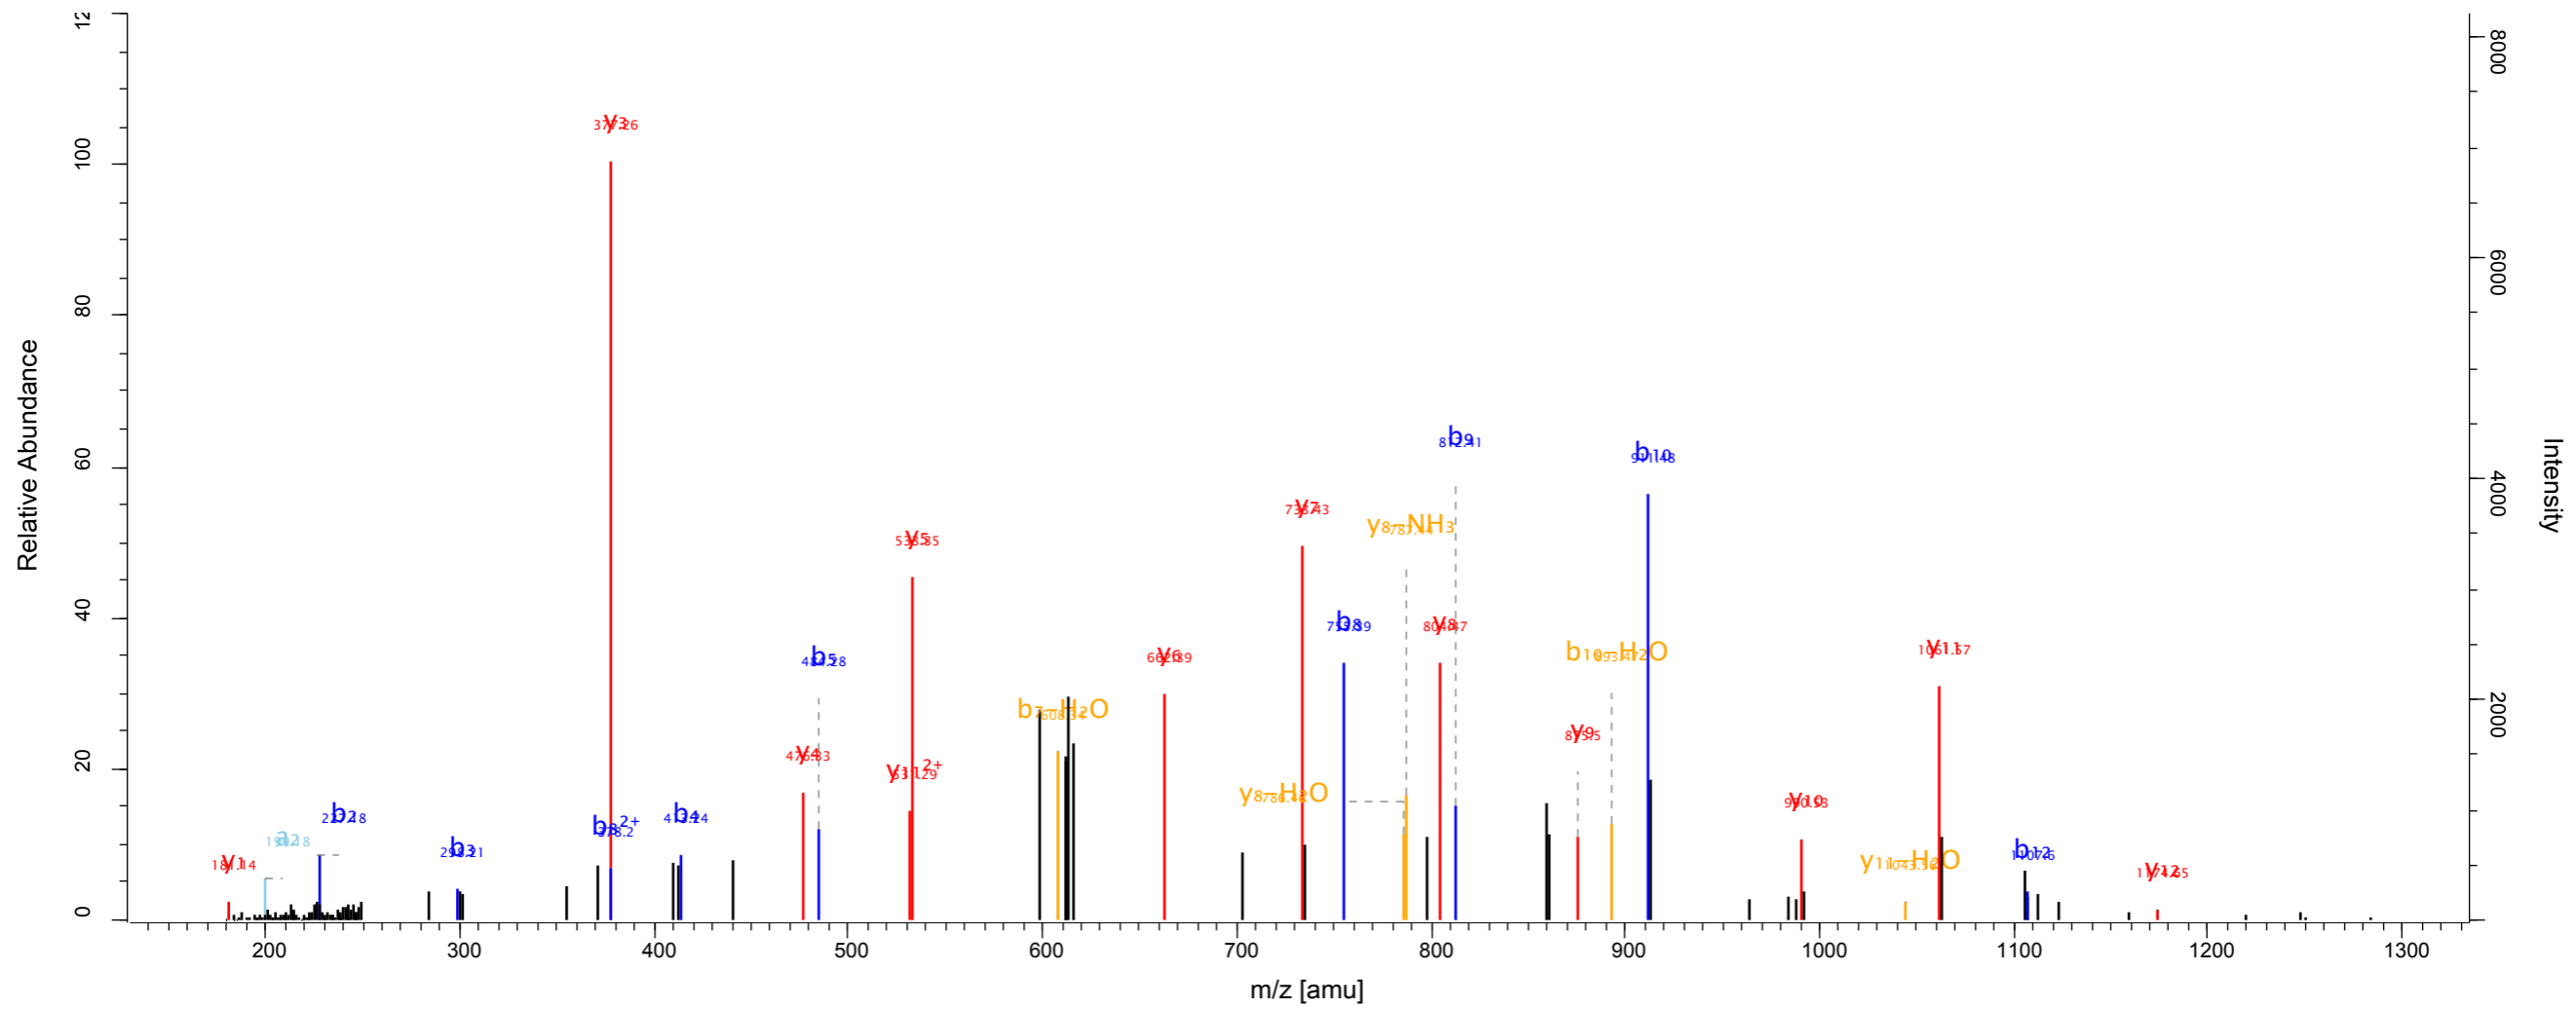

Scan number 4131 Raw file SKaraca\_LMB\_TCE\_Forward\_17\_191011\_rep1  
 Method ITMS; CID Pepti... 130.94

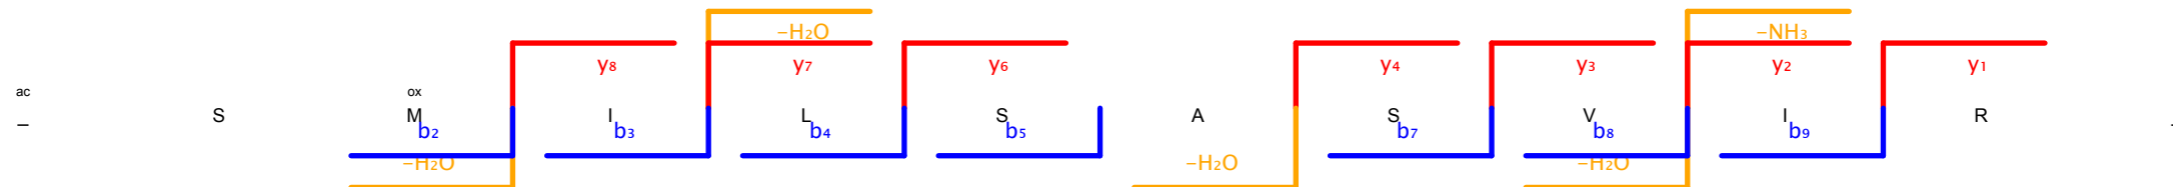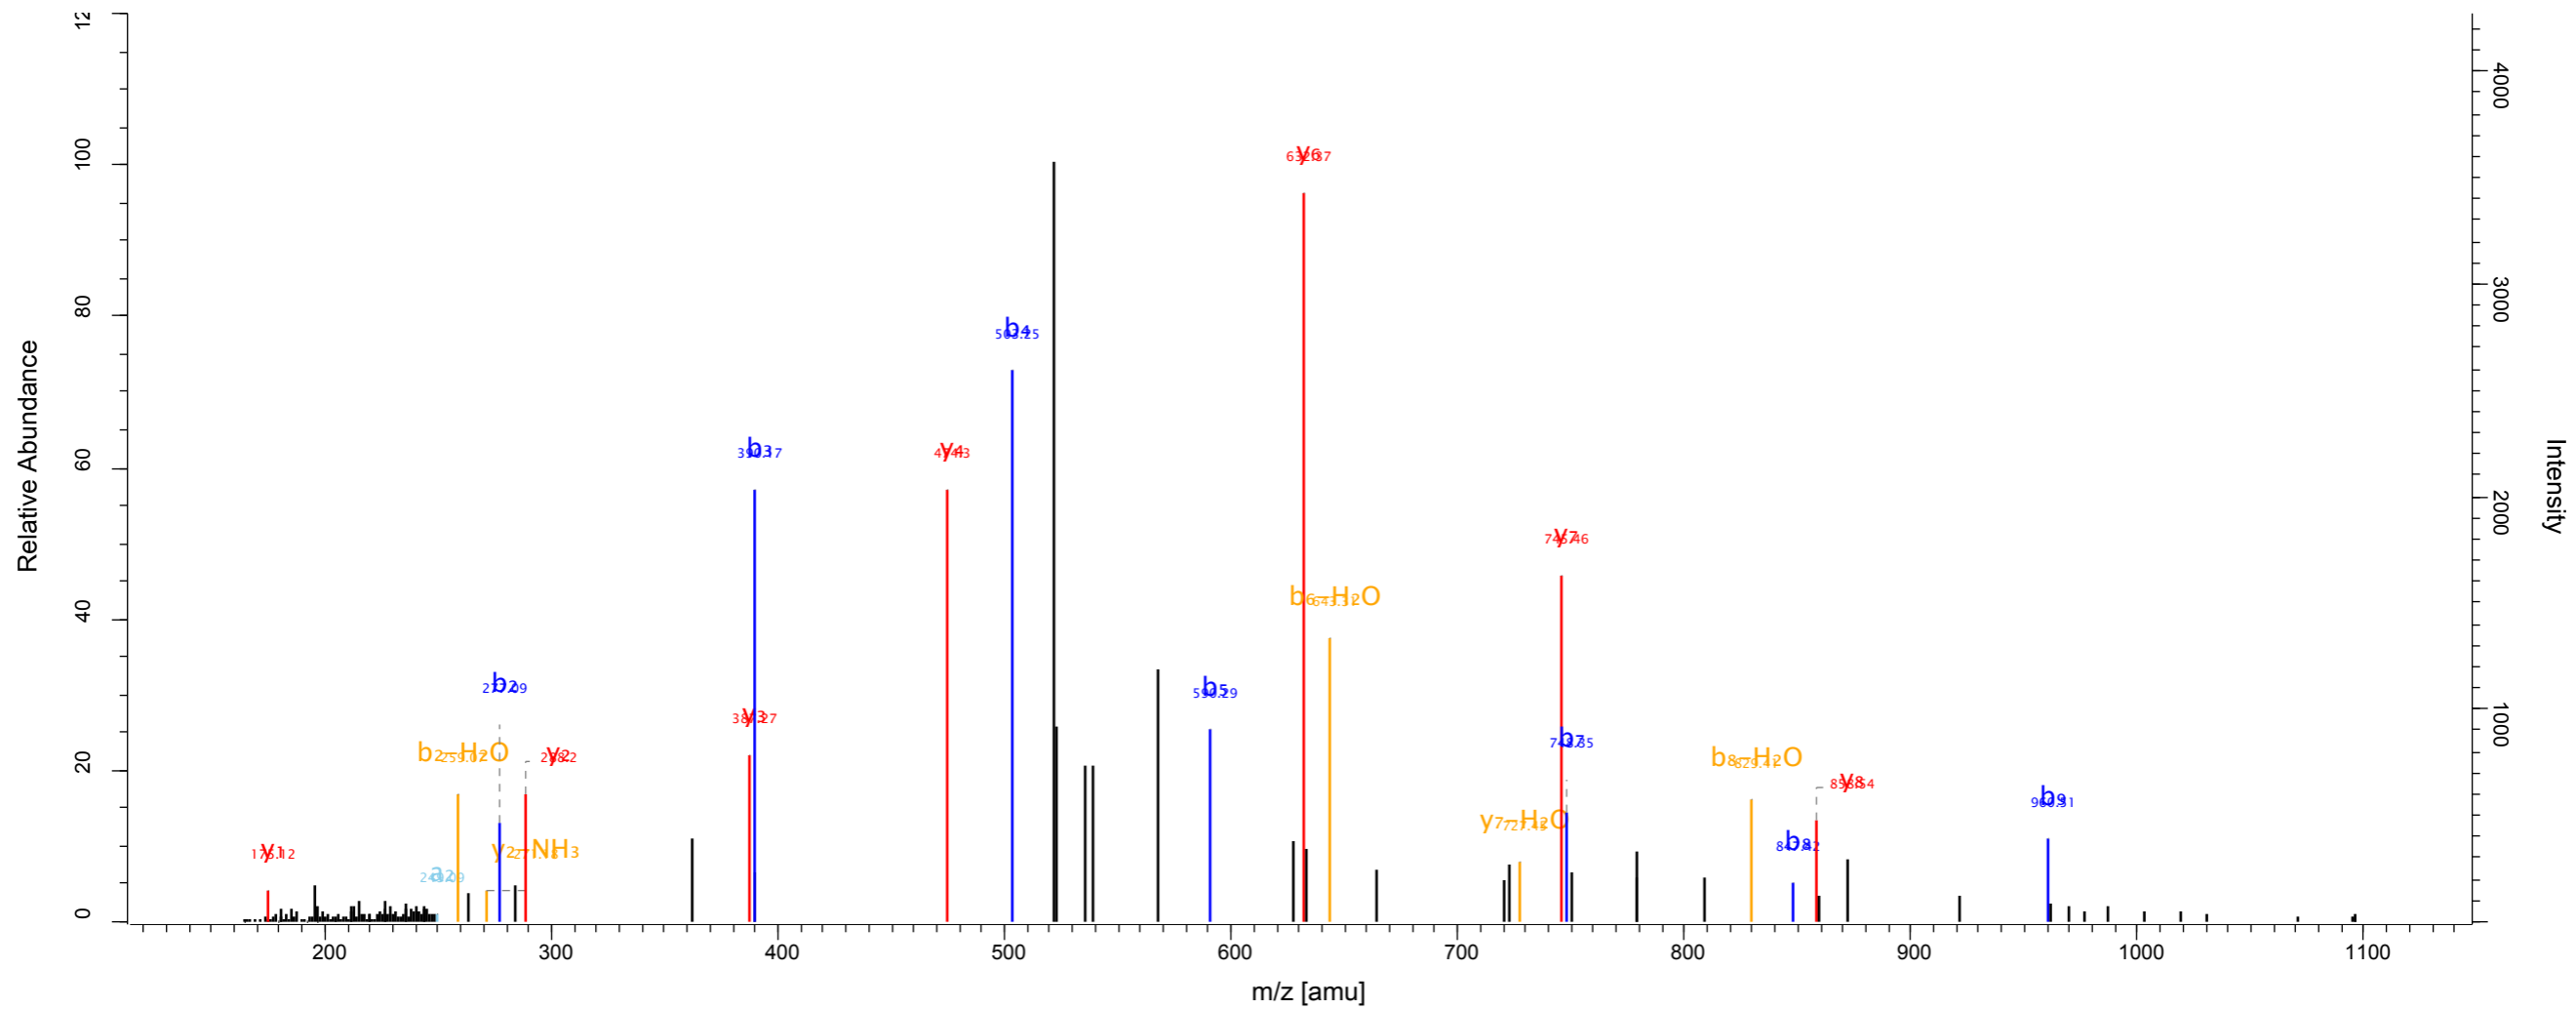

|             |           |          |                                        |
|-------------|-----------|----------|----------------------------------------|
| Scan number | 1689      | Raw file | SKaraca_LMB_TCE_Forward_17_191011_rep2 |
| Method      | ITMS; CID | Pepti... | 160.52                                 |

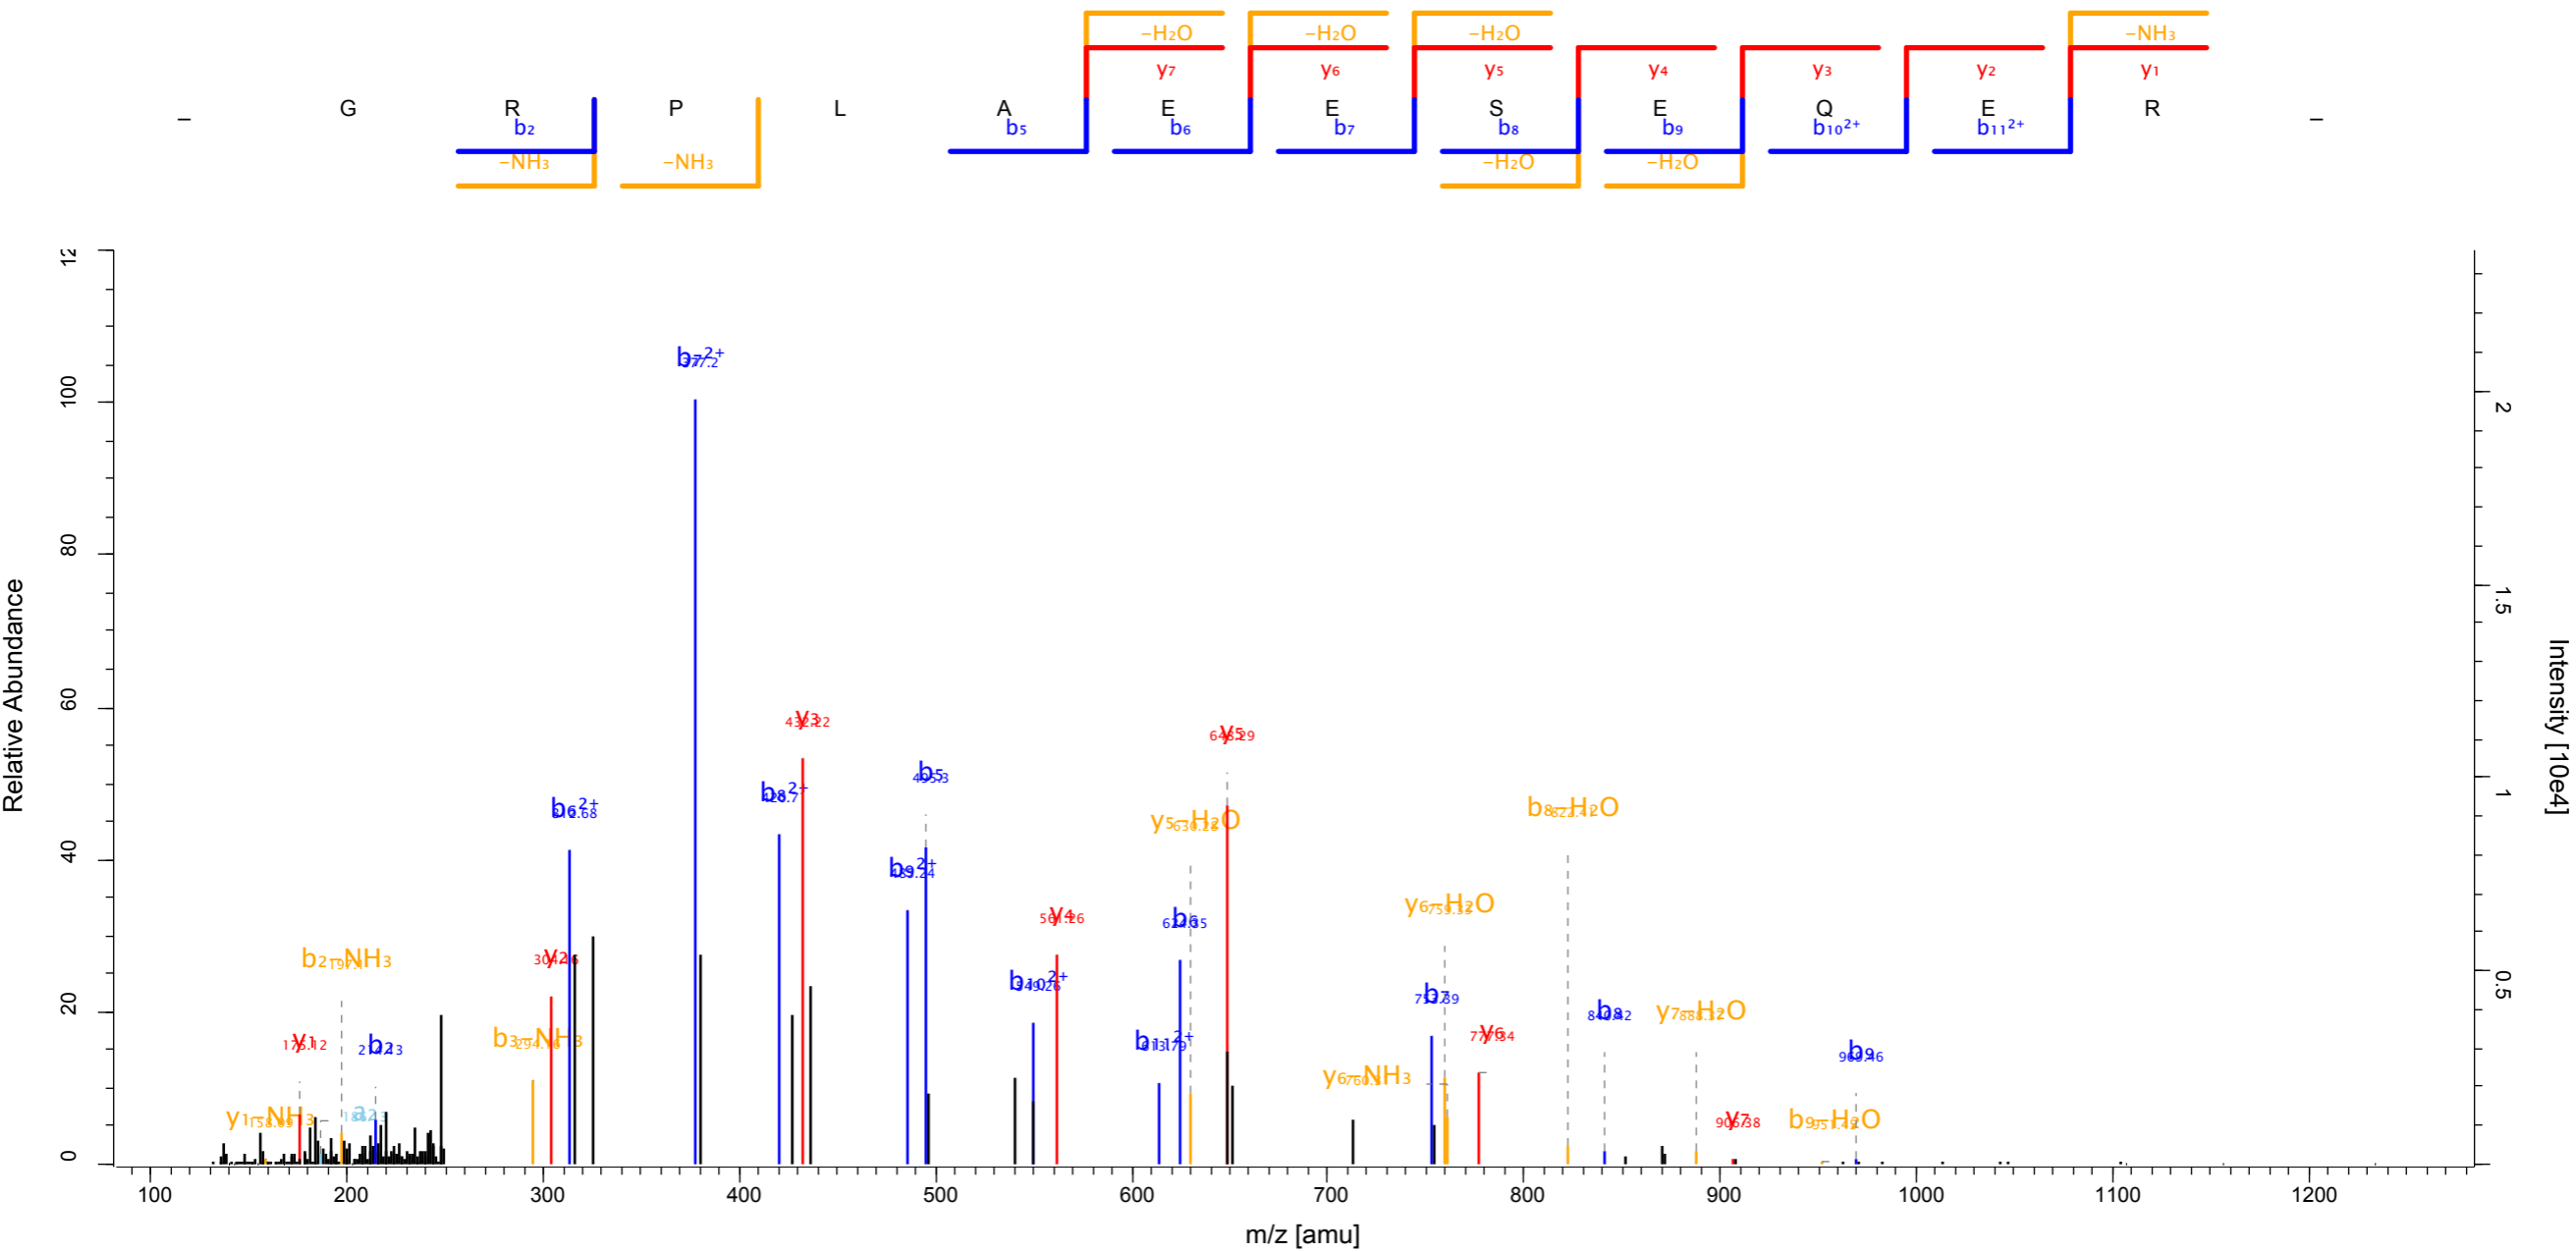

Scan number 3098 Raw file SKaraca\_LMB\_TCE\_Forward\_17\_191011\_rep2  
 Method ITMS; CID Pepti... 166.92

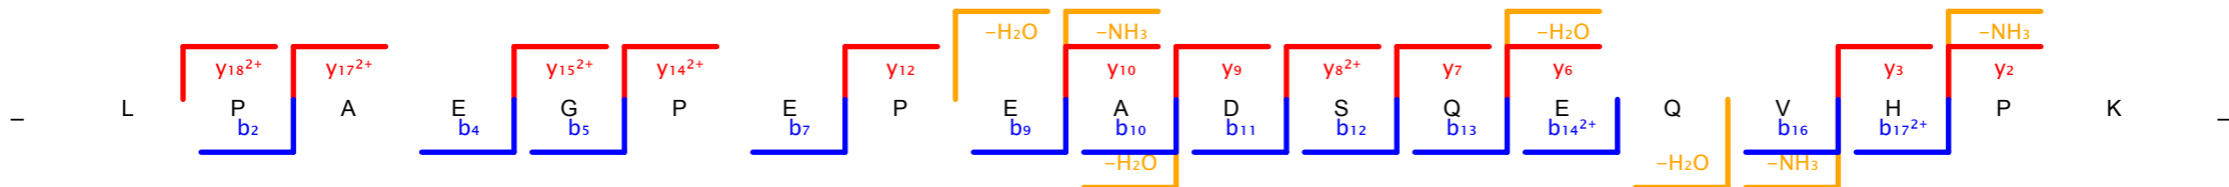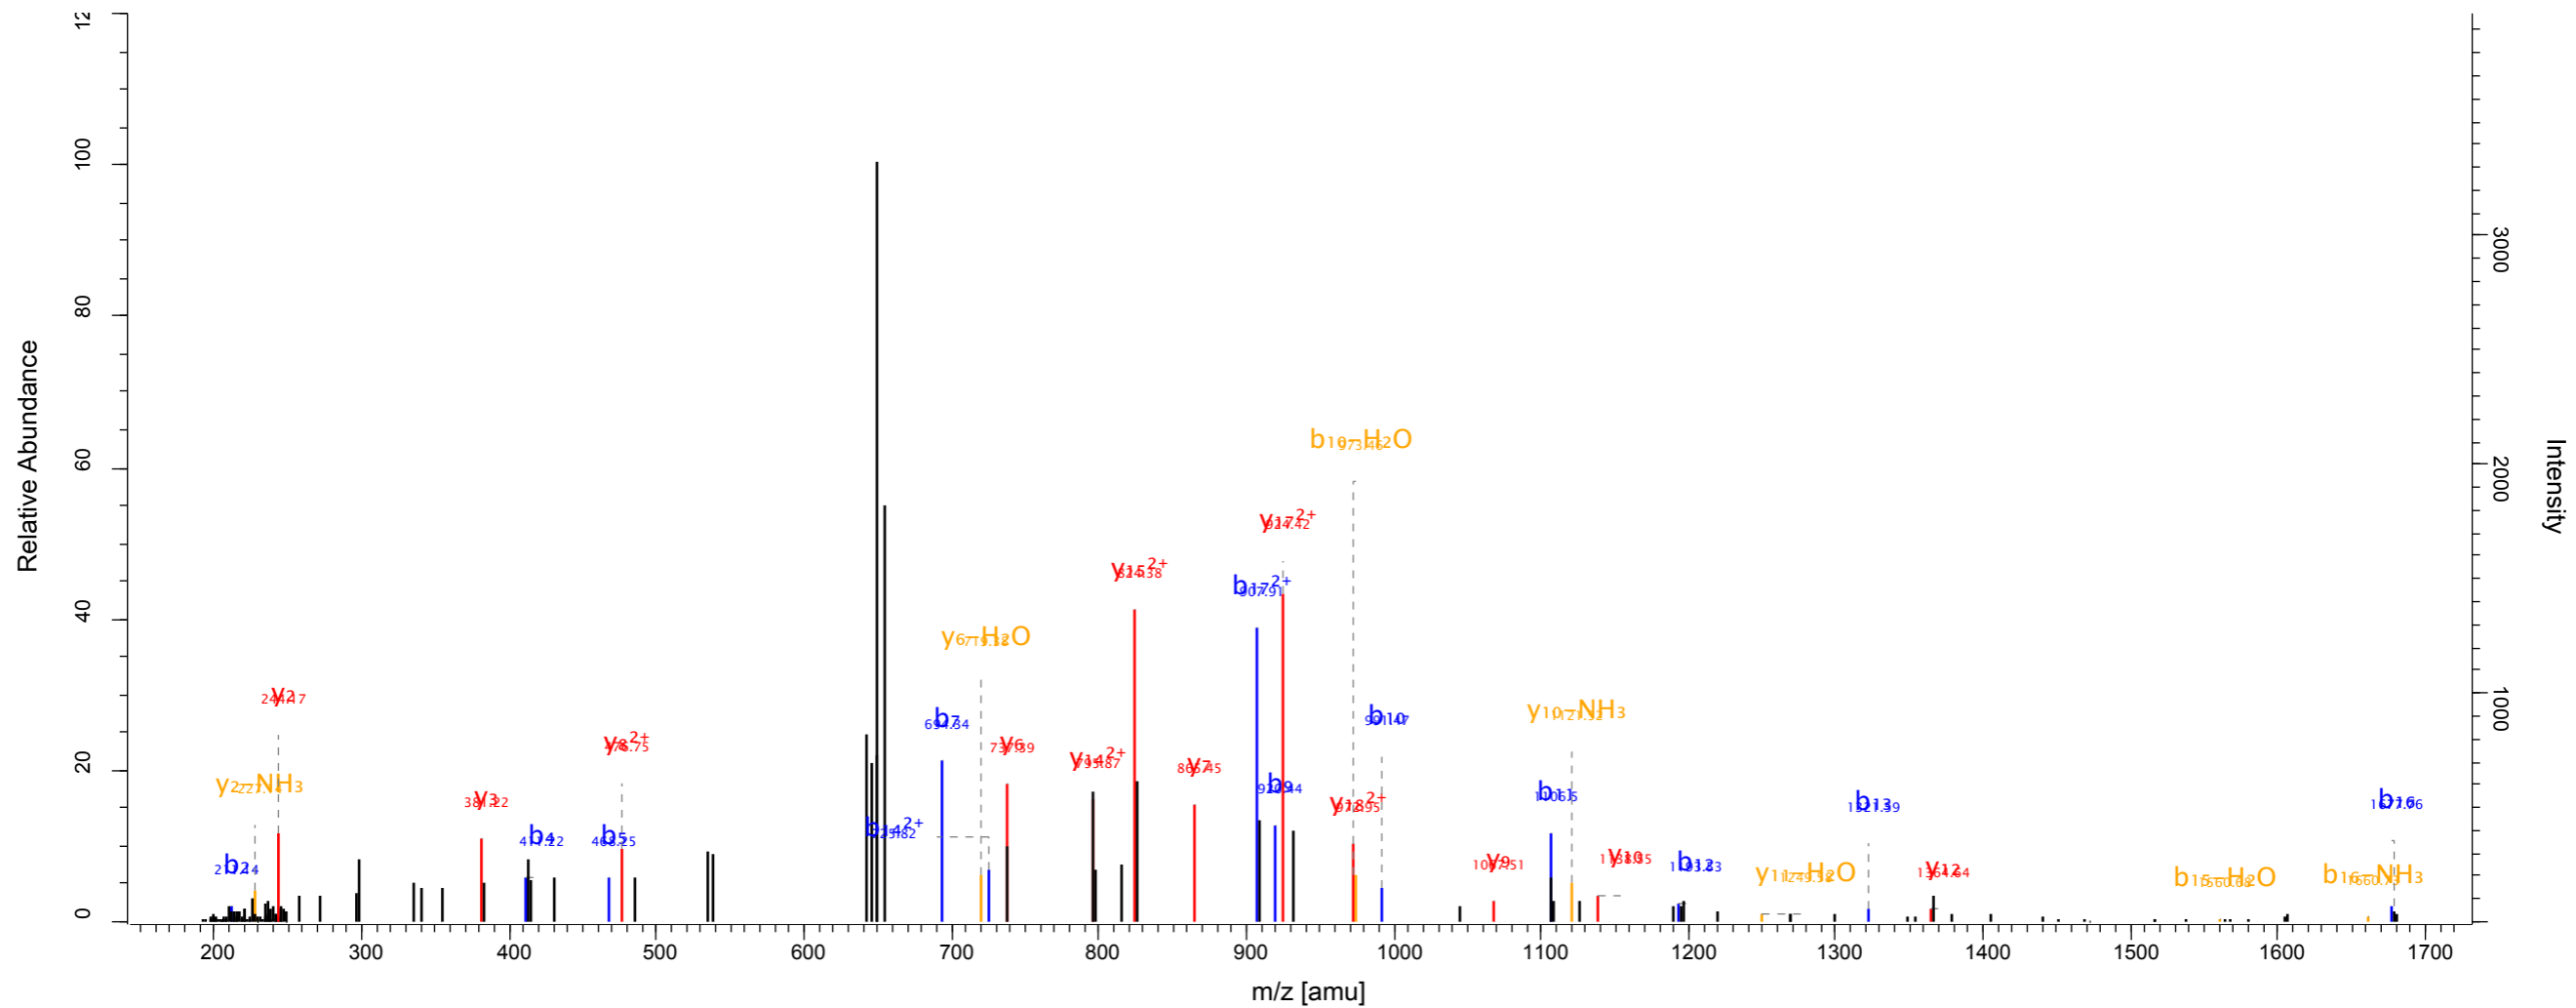

Scan number 4259 Raw file SKaraca\_LMB\_TCE\_Forward\_17\_191011\_rep2  
 Method ITMS; CID Pepti... 128.27

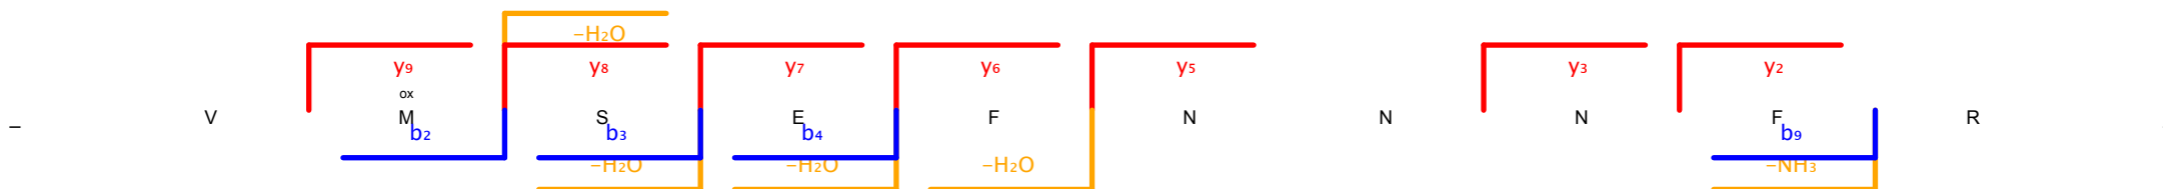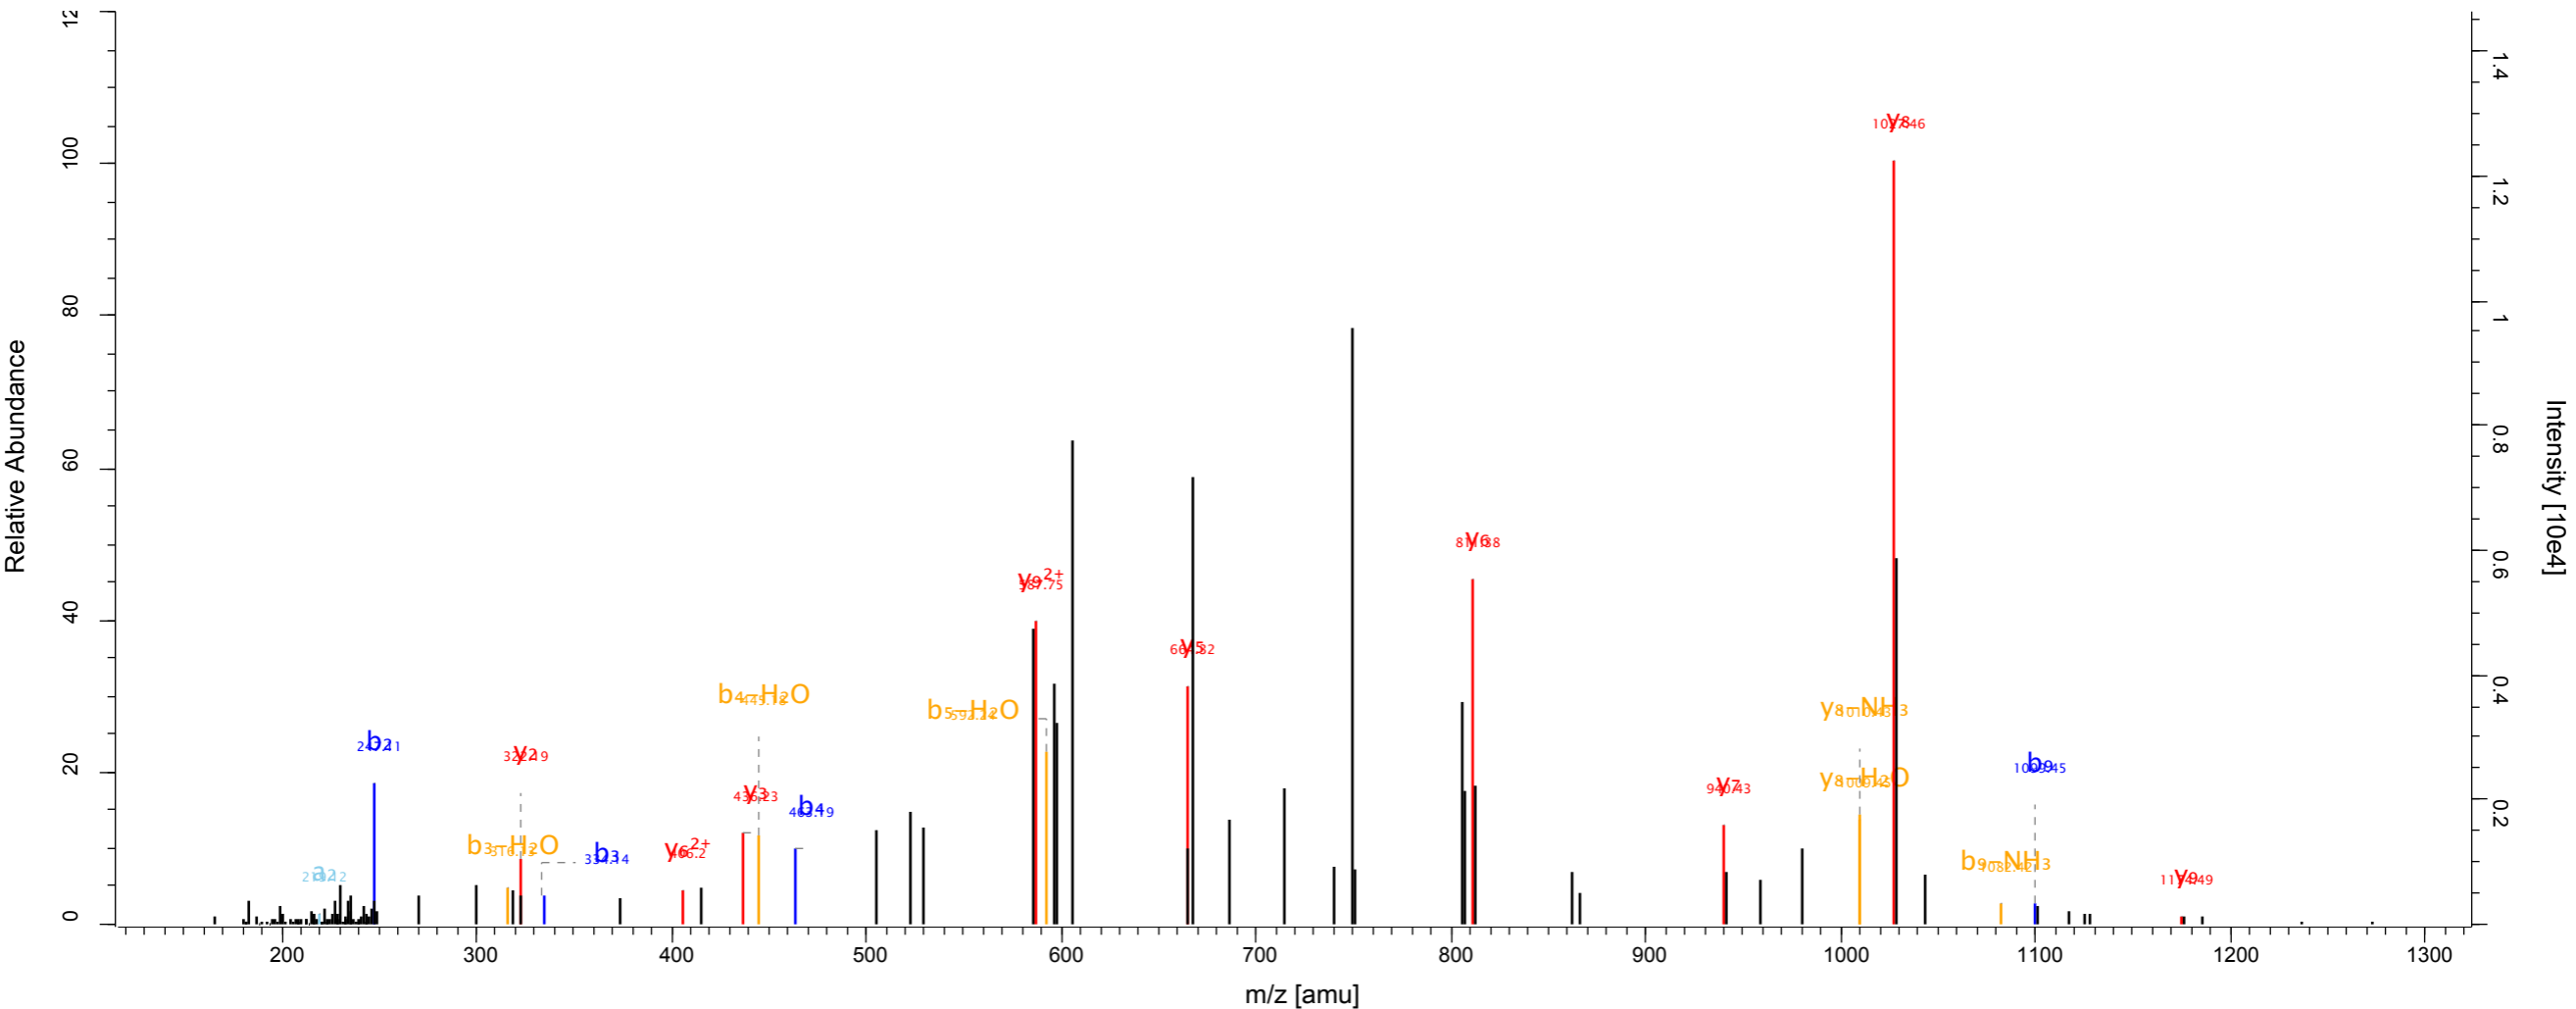

Scan number 4644 Raw file SKaraca\_LMB\_TCE\_Forward\_17\_191011\_rep2  
 Method ITMS; CID Pepti... 162.93

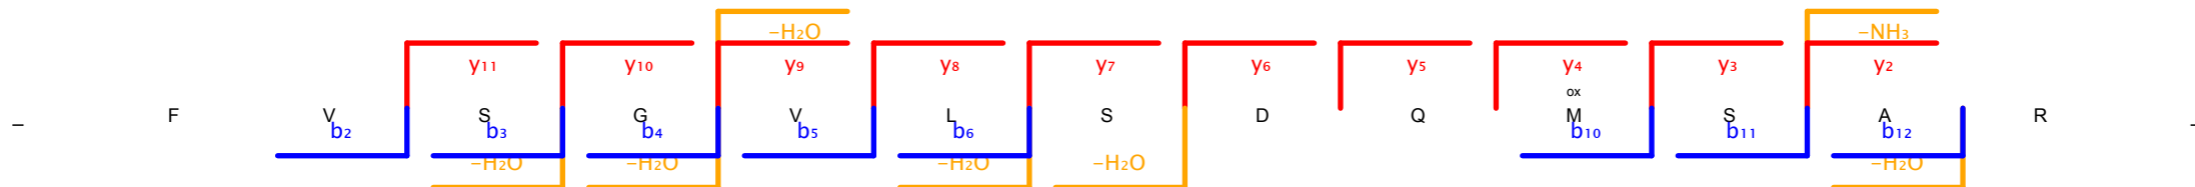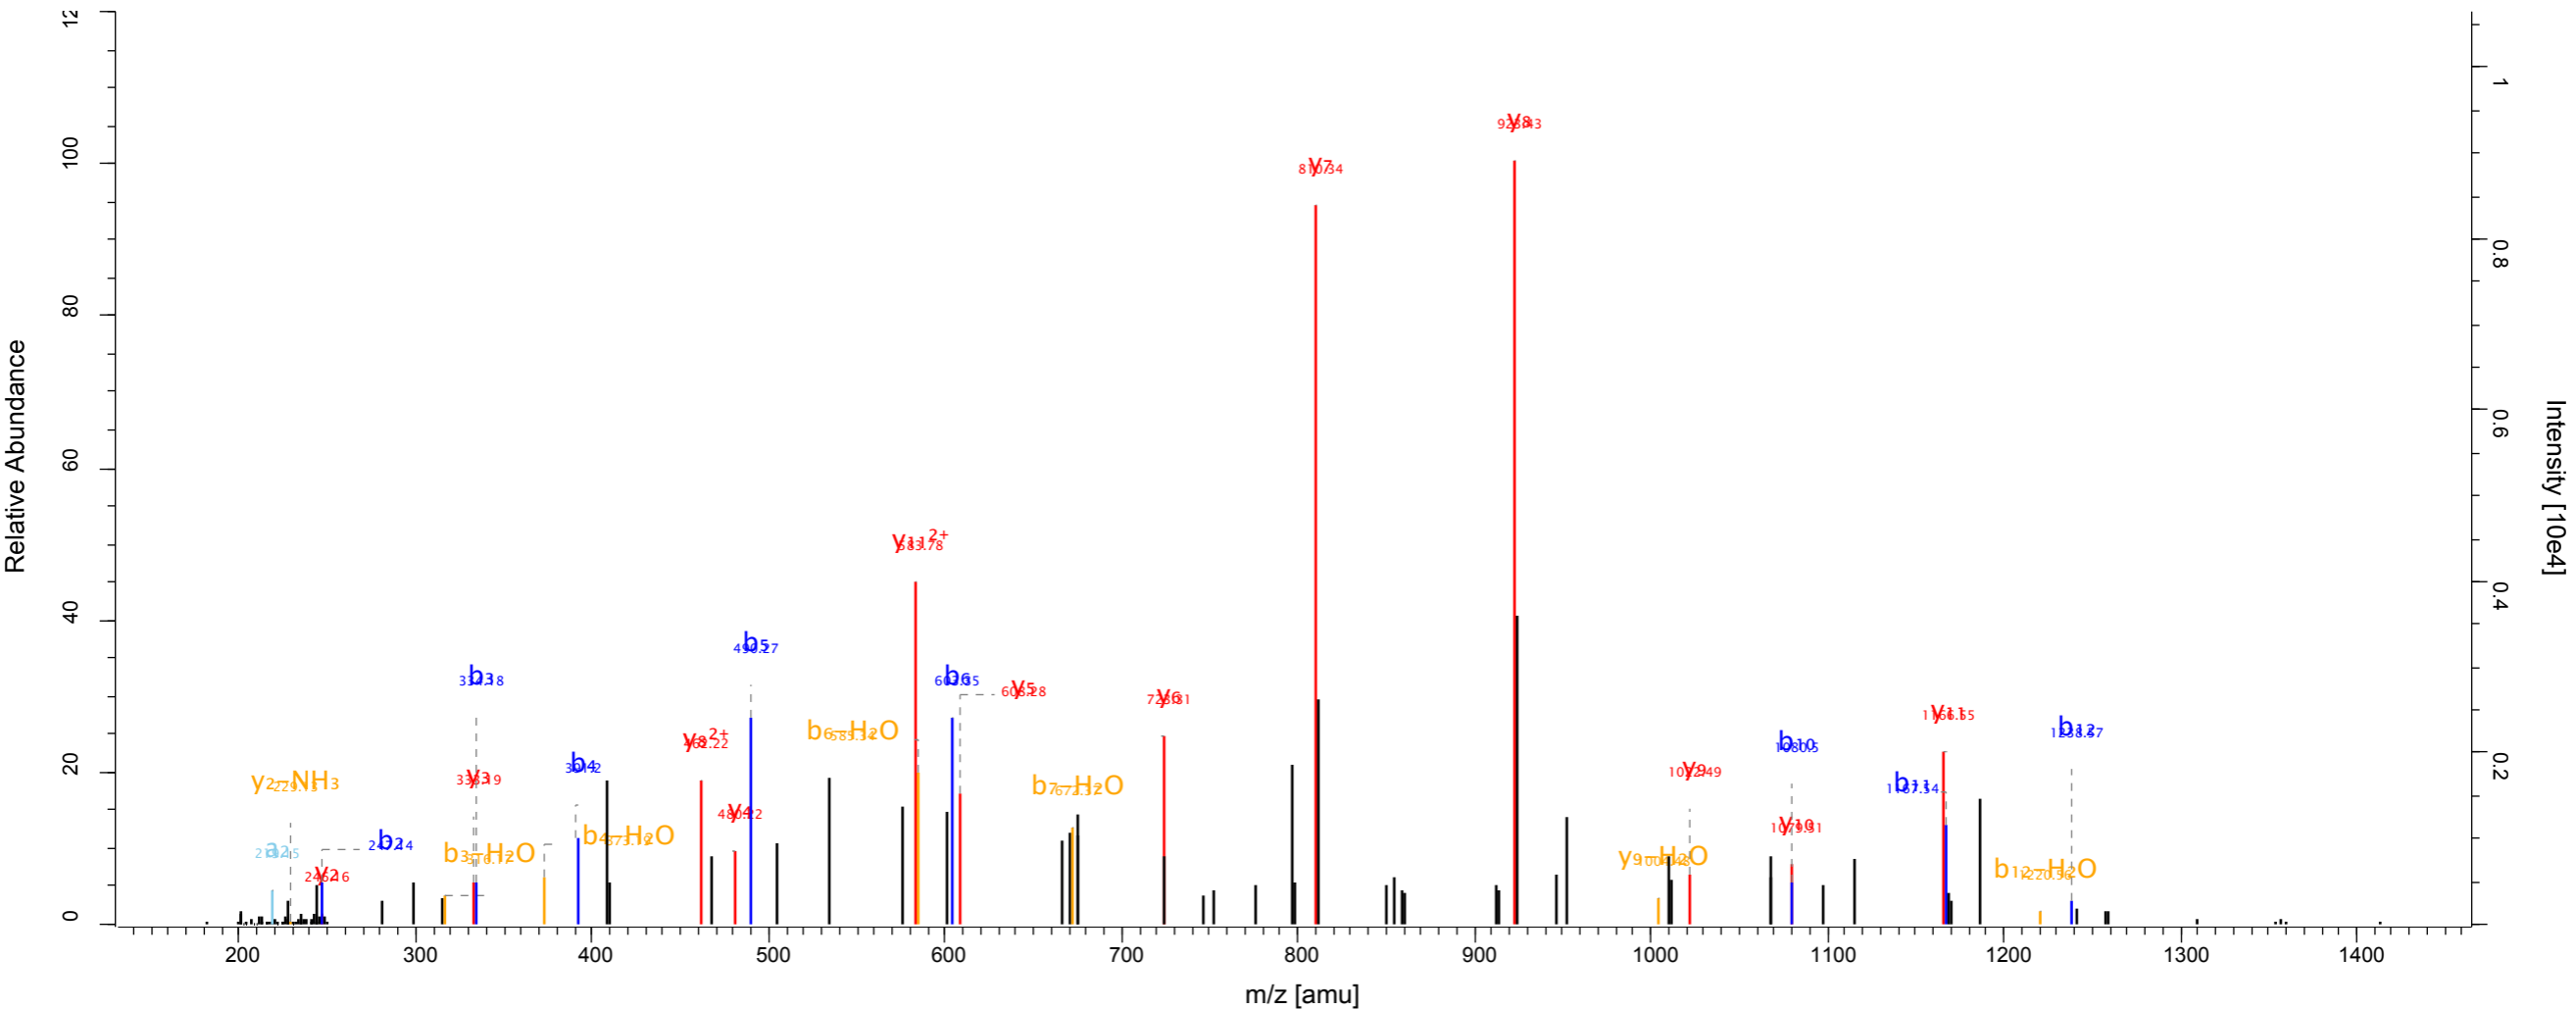

Scan number 4929 Raw file SKaraca\_LMB\_TCE\_Forward\_17\_191011\_rep2  
 Method ITMS; CID Pepti... 278.82

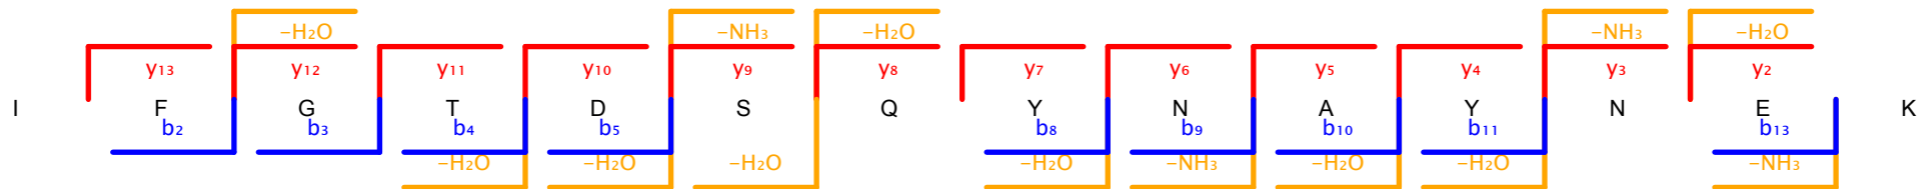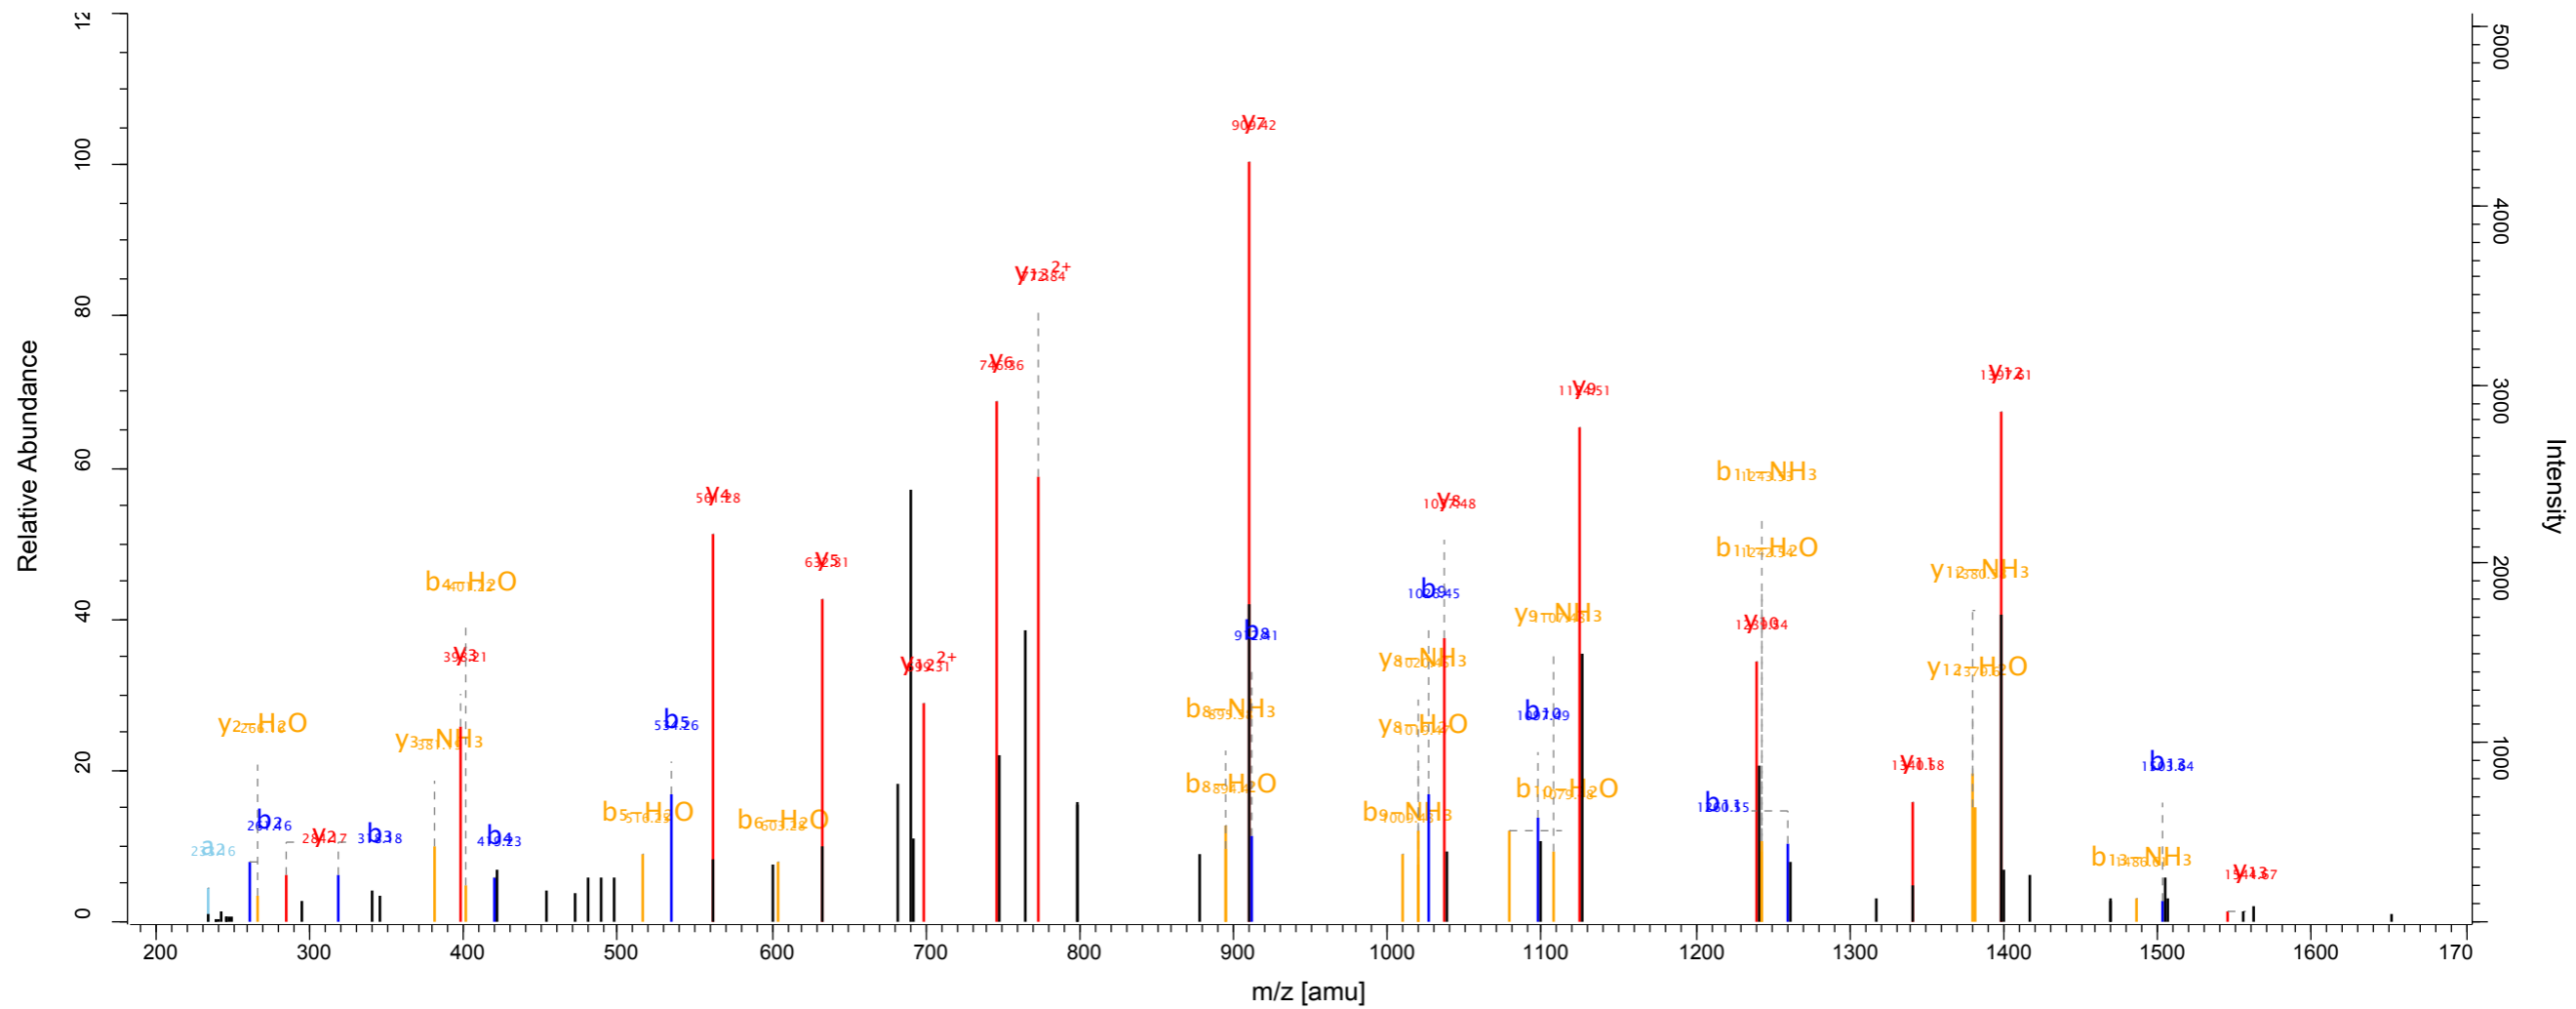



Scan number 5230 Raw file SKaraca\_LMB\_TCE\_Forward\_17\_191011\_rep2  
 Method ITMS; CID Pepti... 161.17

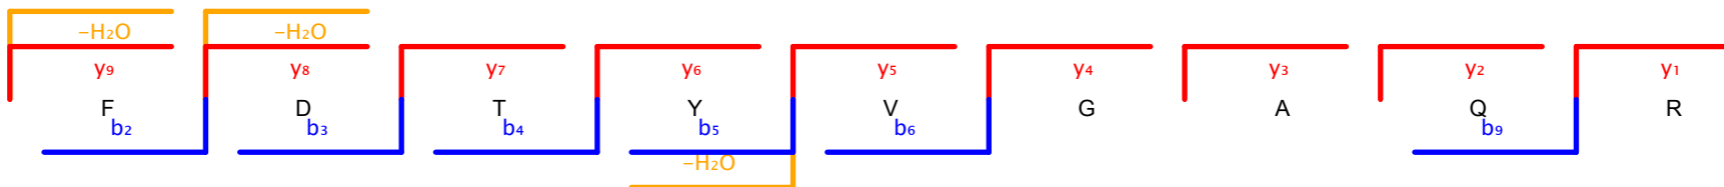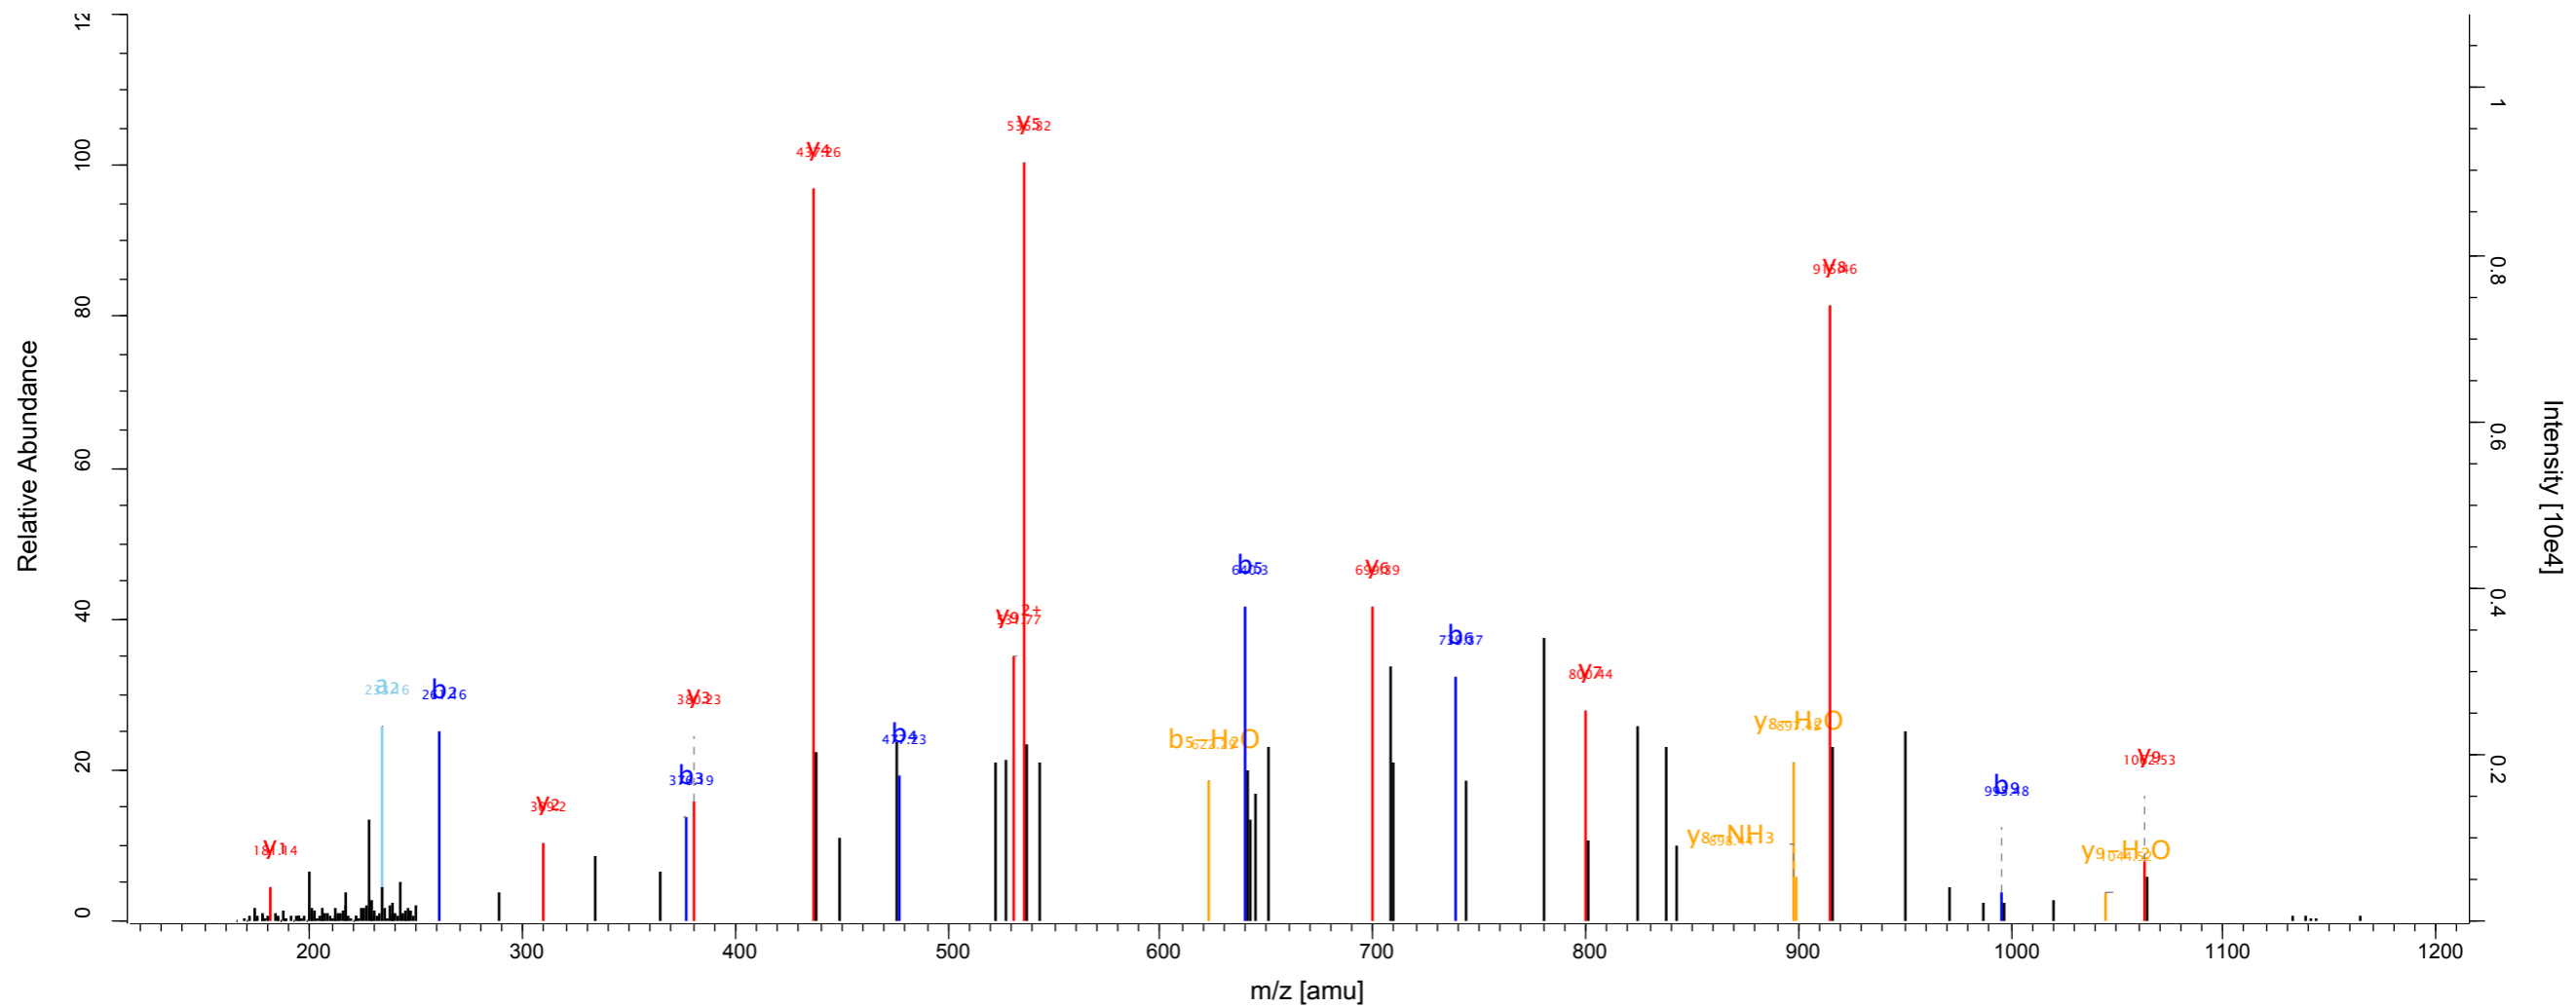

Scan number 7746 Raw file SKaraca\_LMB\_TCE\_Forward\_17\_191011\_rep2  
 Method ITMS; CID Pepti... 252.43

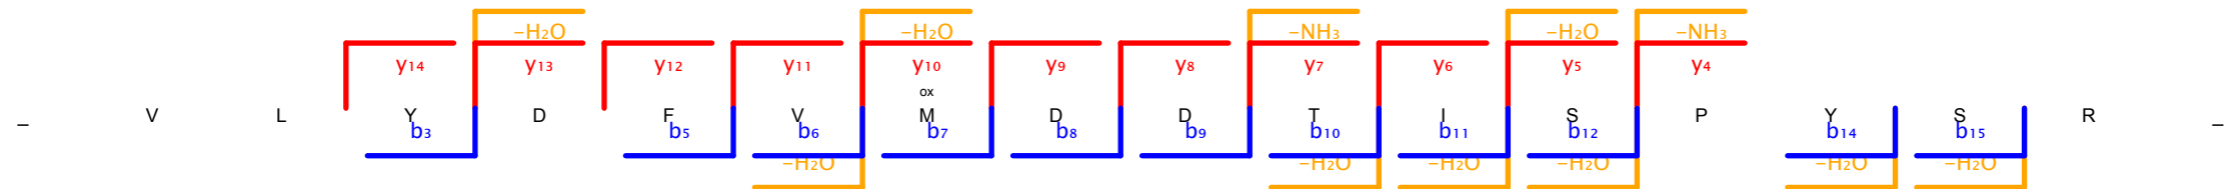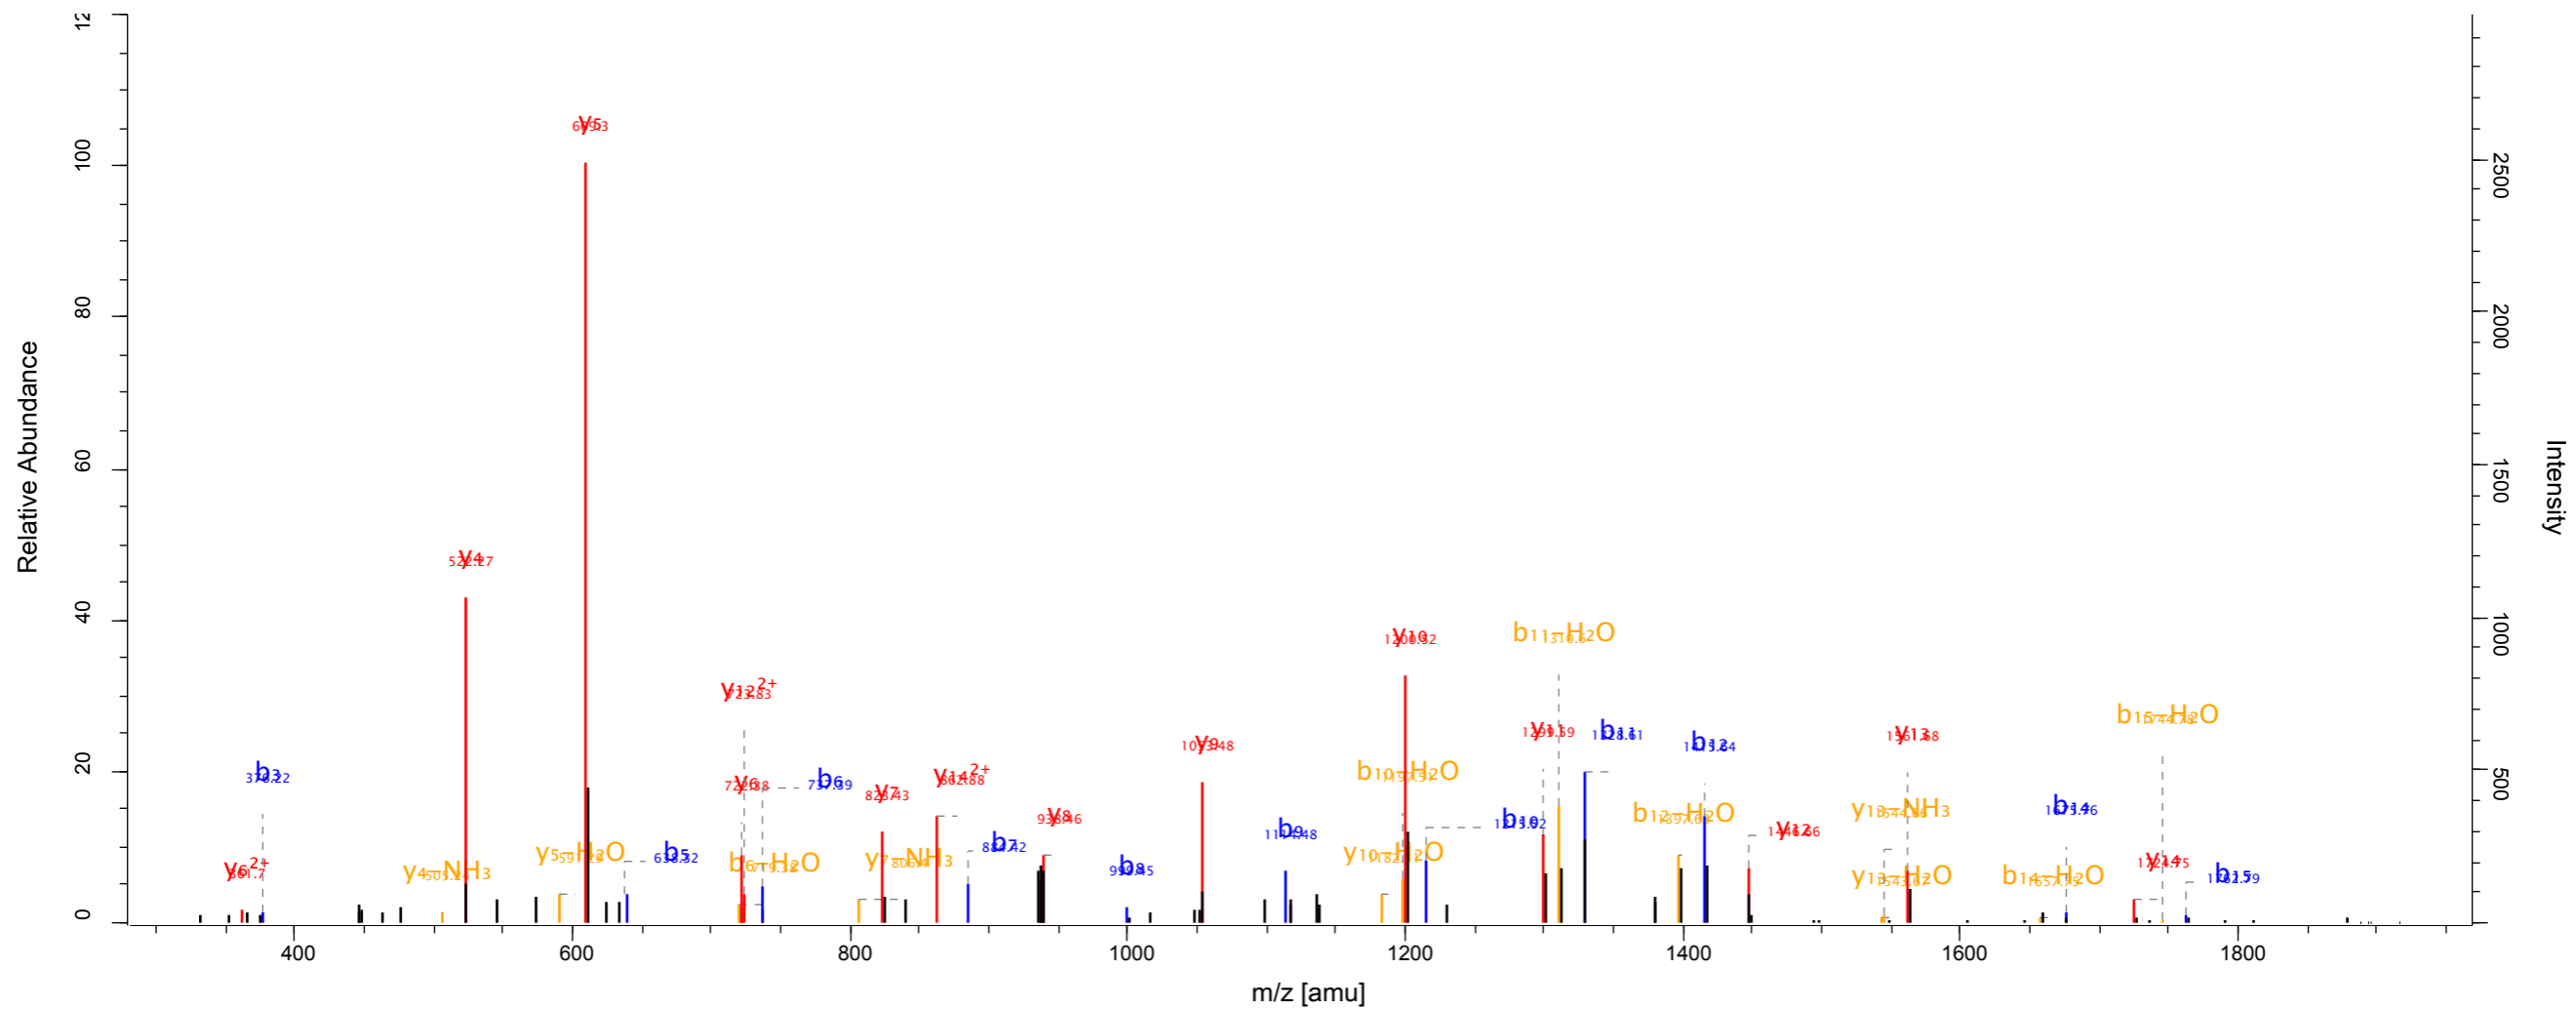

|             |           |          |                                        |
|-------------|-----------|----------|----------------------------------------|
| Scan number | 1078      | Raw file | SKaraca_LMB_TCE_Forward_18_191011_rep1 |
| Method      | ITMS; CID | Pepti... | 190.73                                 |

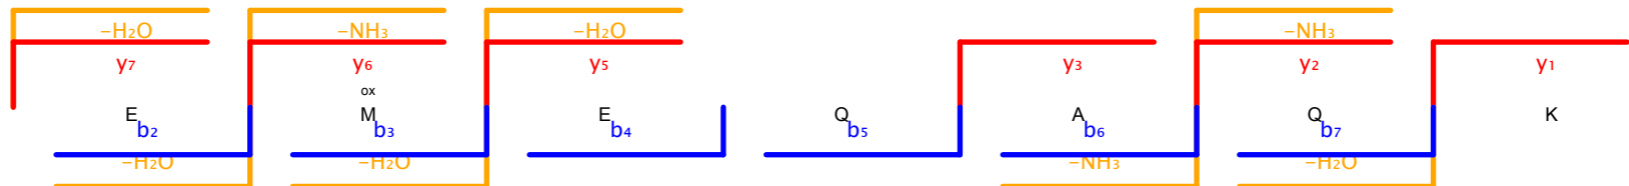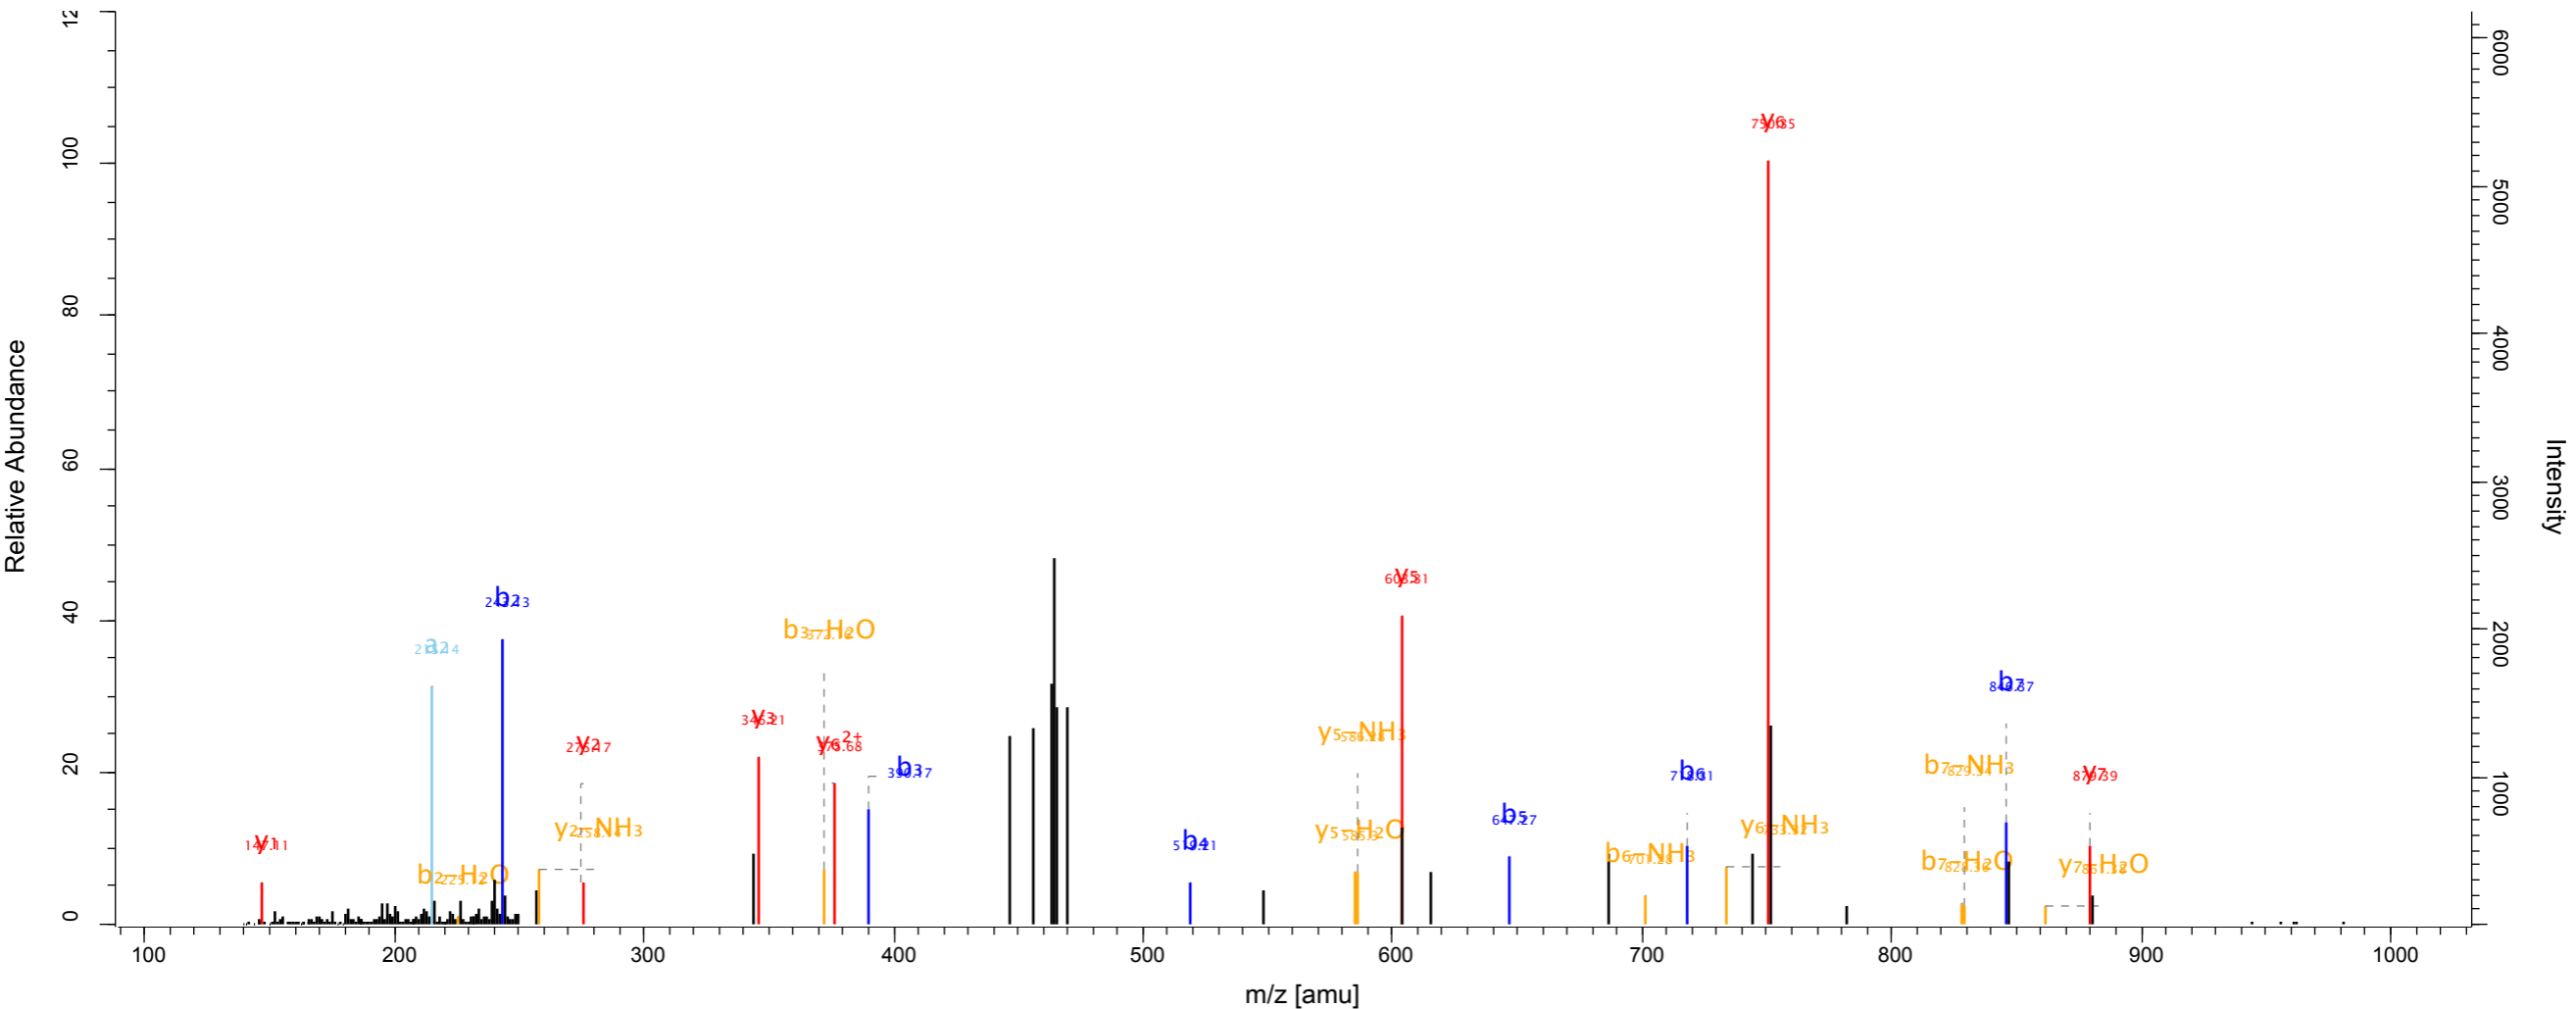

Scan number 2936 Raw file SKaraca\_LMB\_TCE\_Forward\_18\_191011\_rep1  
 Method ITMS; CID Pepti... 237.68

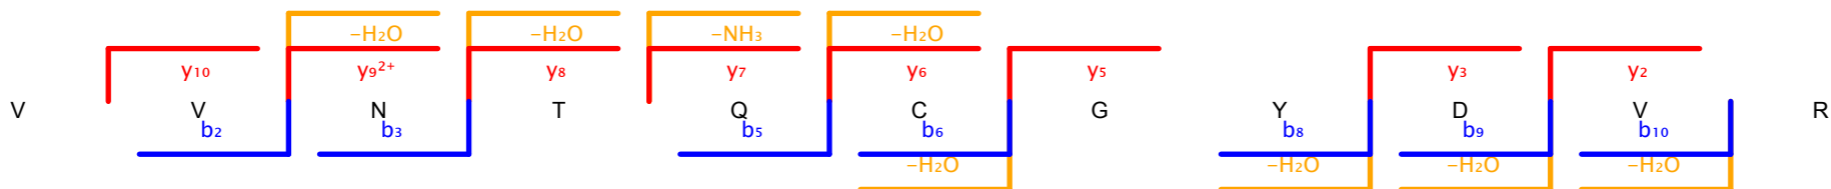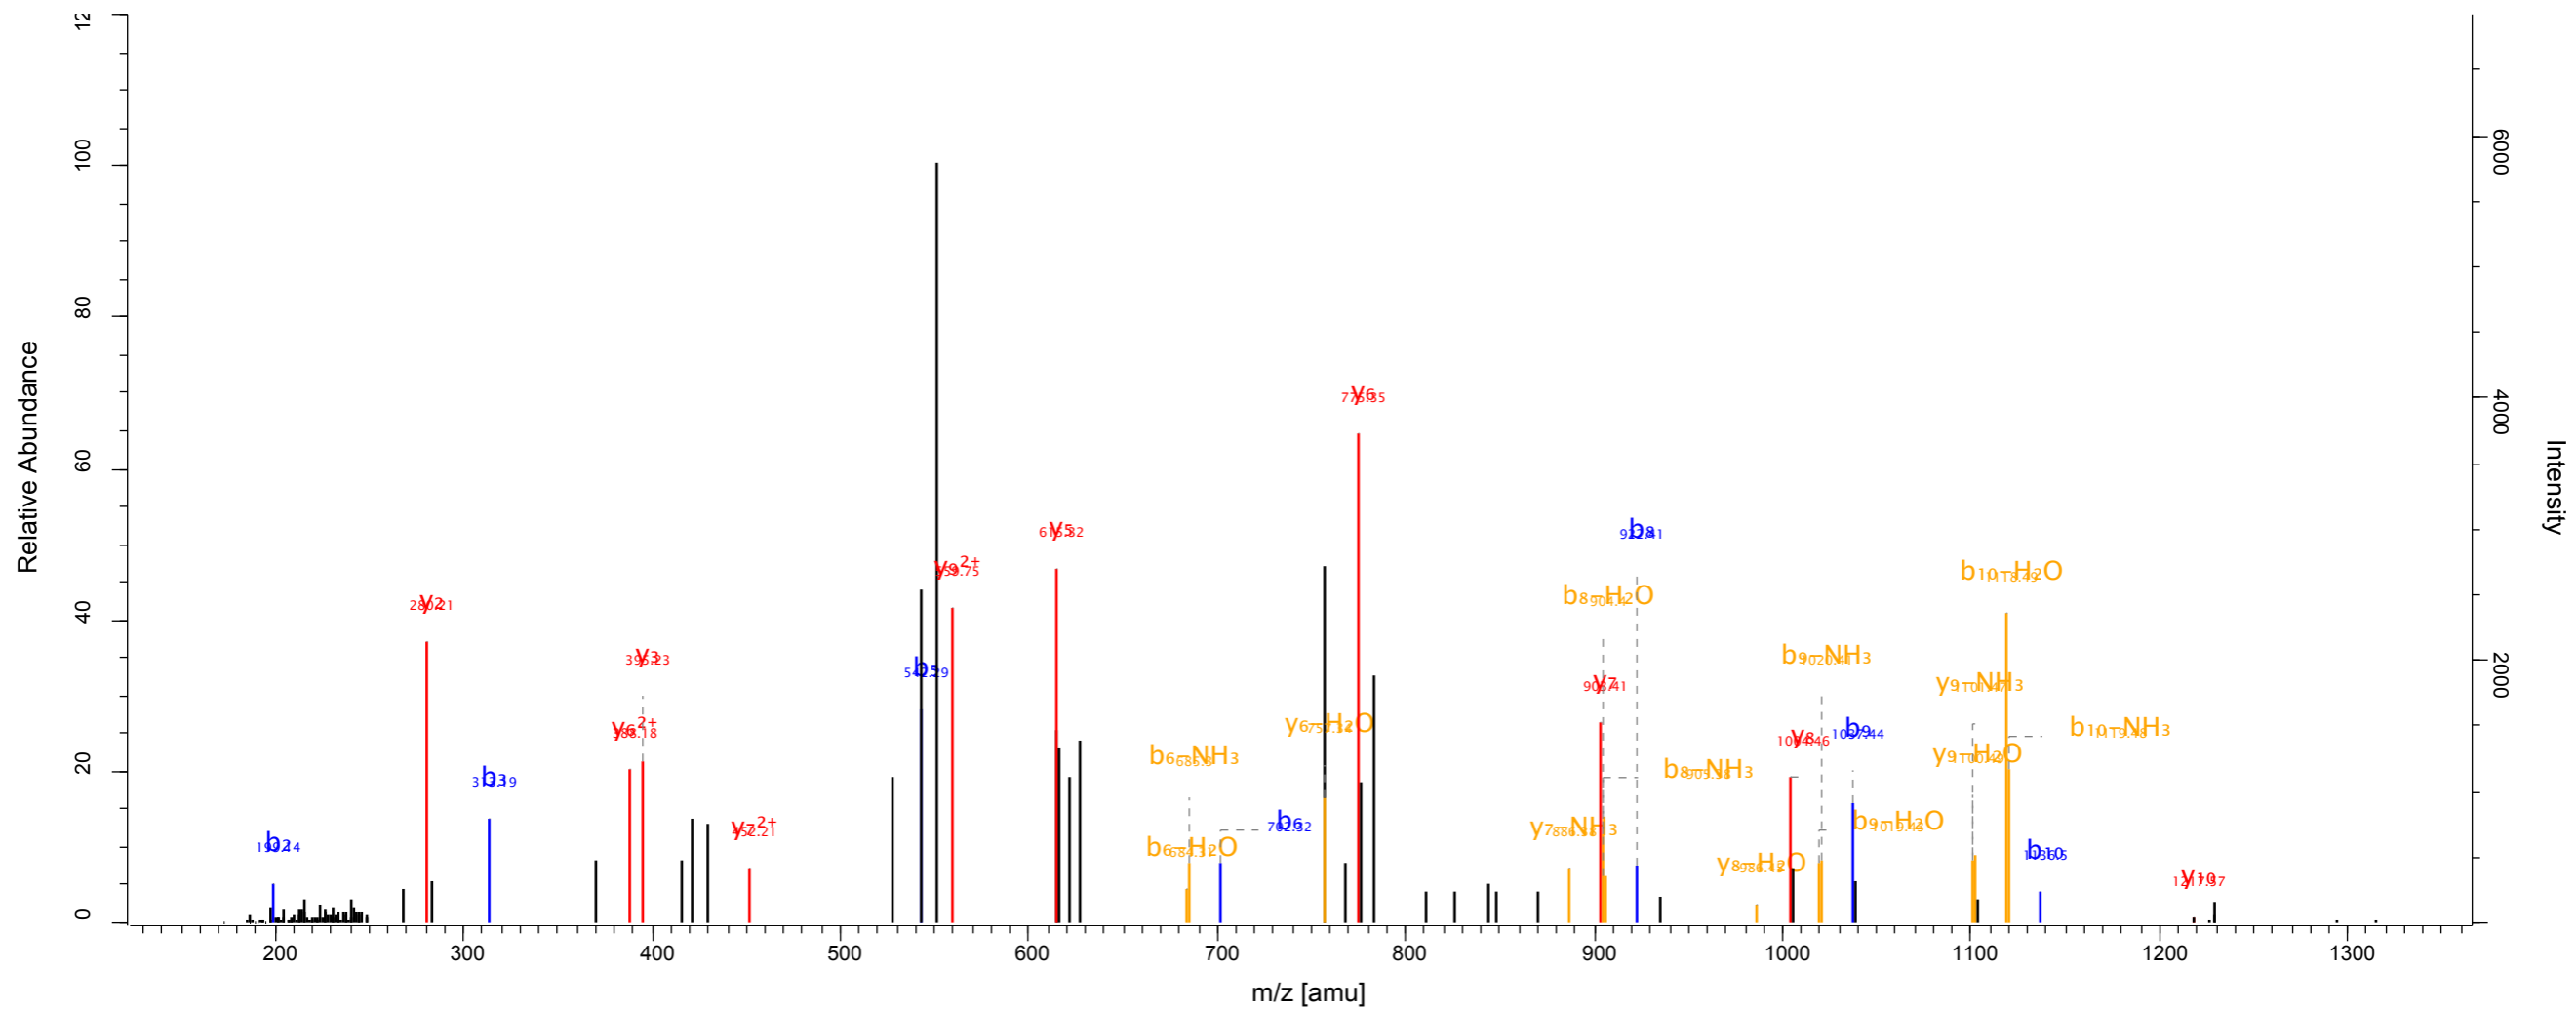

Scan number 6437 Raw file SKaraca\_LMB\_TCE\_Forward\_18\_191011\_rep1  
 Method ITMS; CID Pepti... 90.97

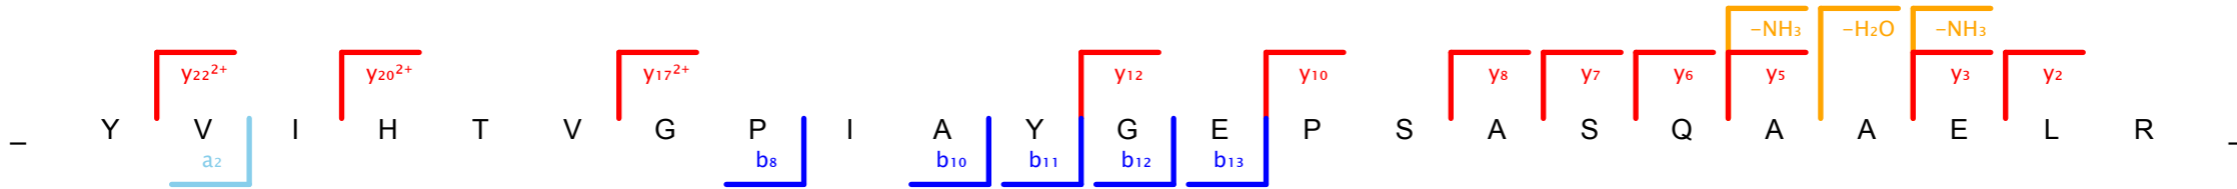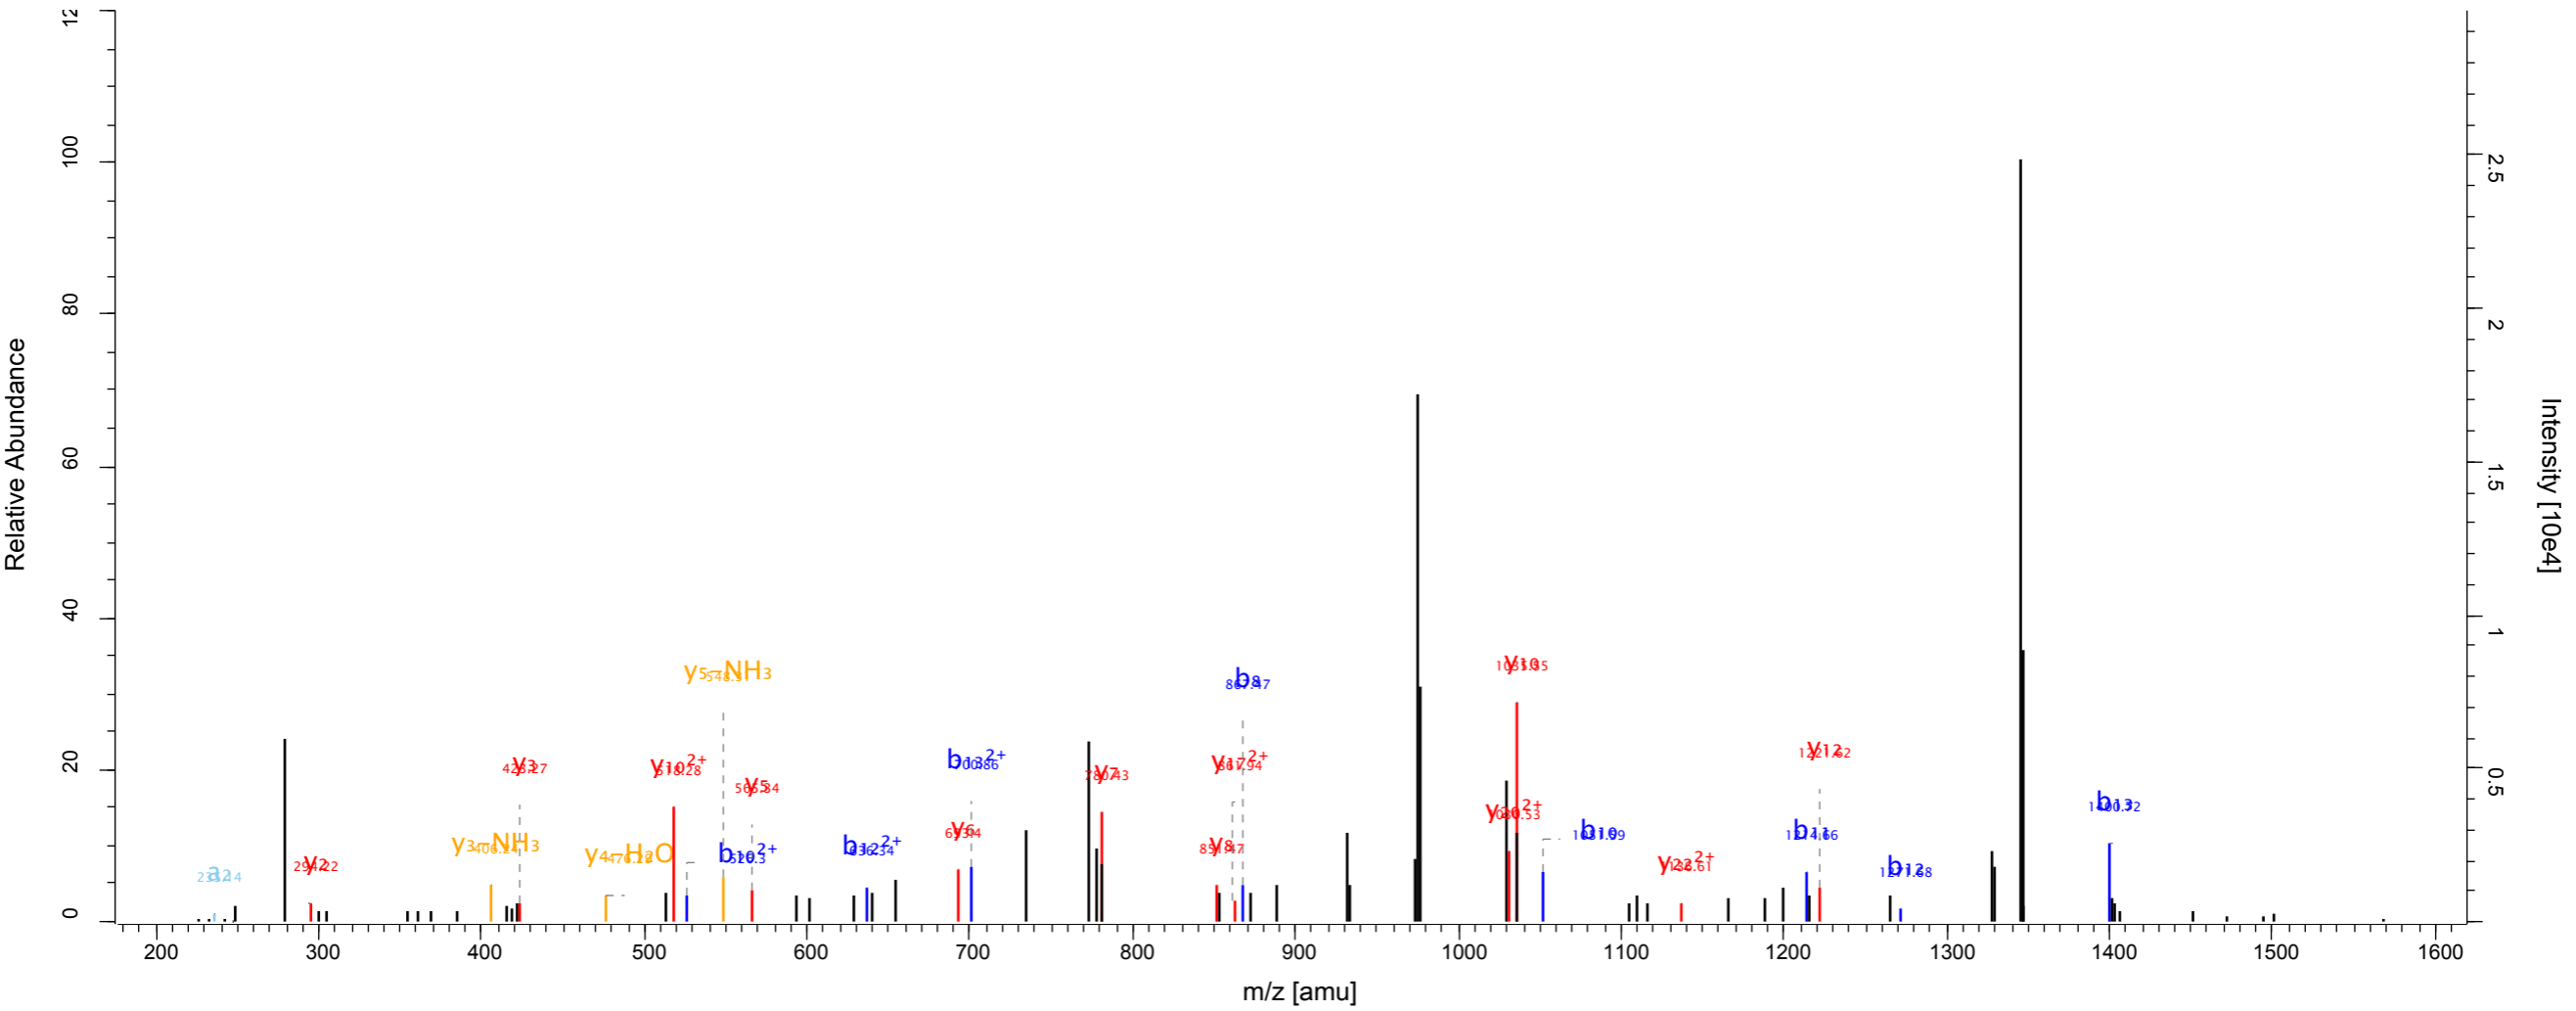

Scan number 7057 Raw file SKaraca\_LMB\_TCE\_Forward\_18\_191011\_rep1  
 Method ITMS; CID Pepti... 130.56

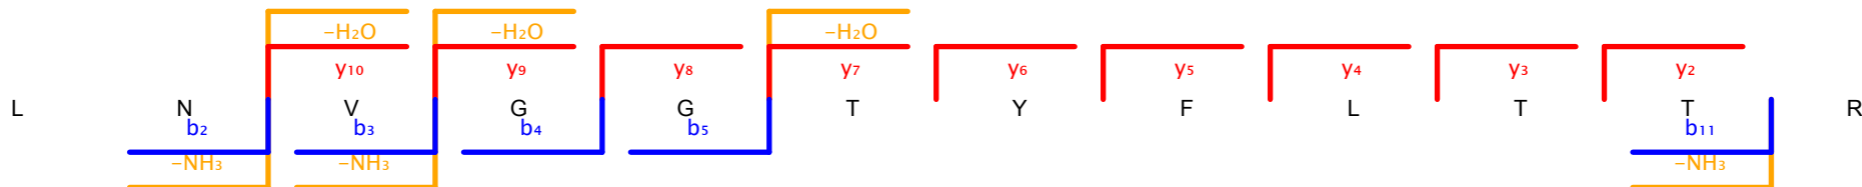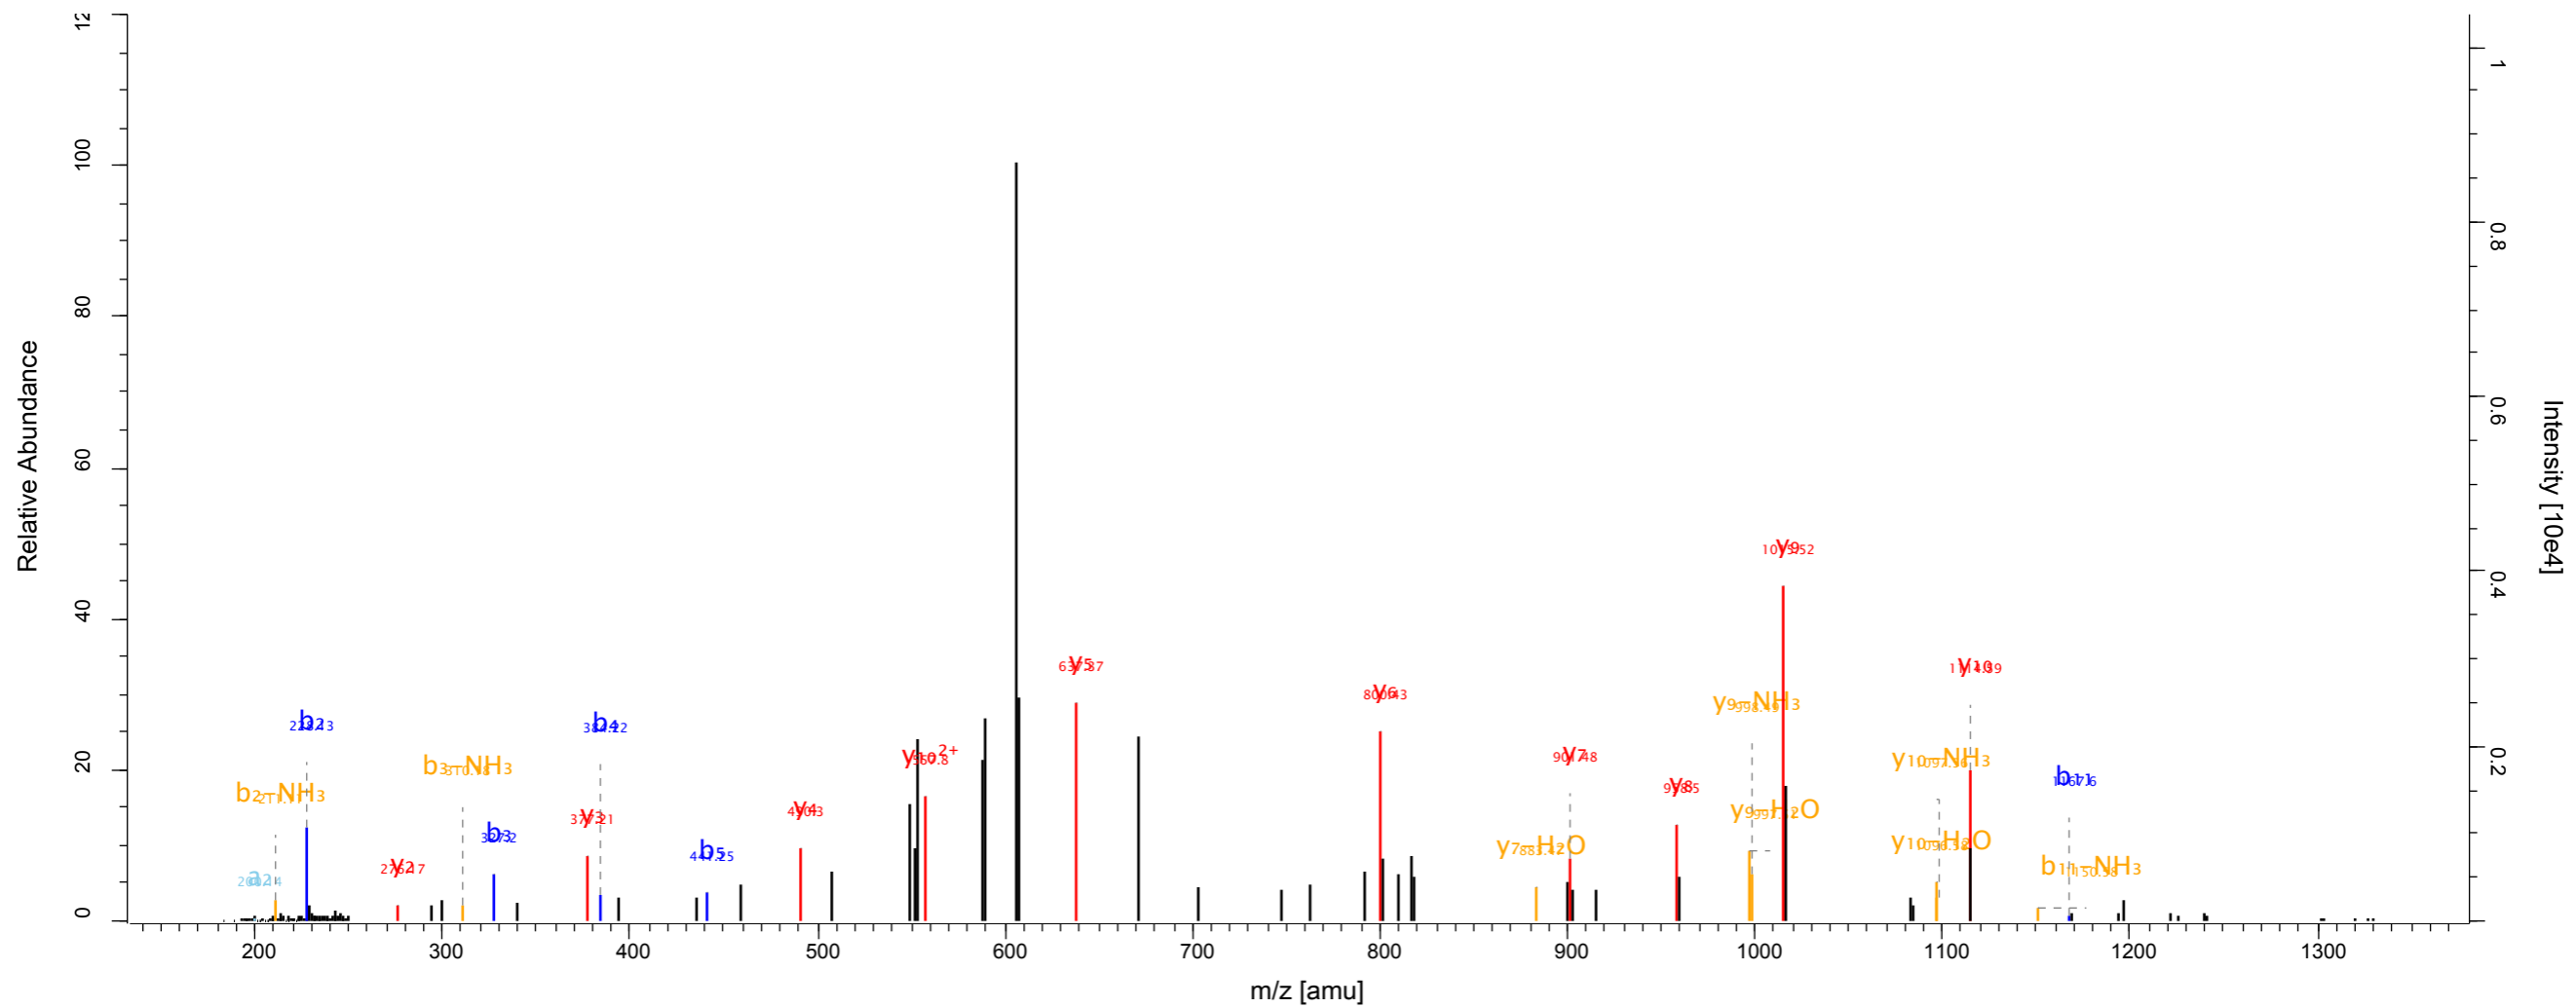

Scan number 8262 Raw file SKaraca\_LMB\_TCE\_Forward\_18\_191011\_rep1  
Method ITMS; CID Pepti... 111.94

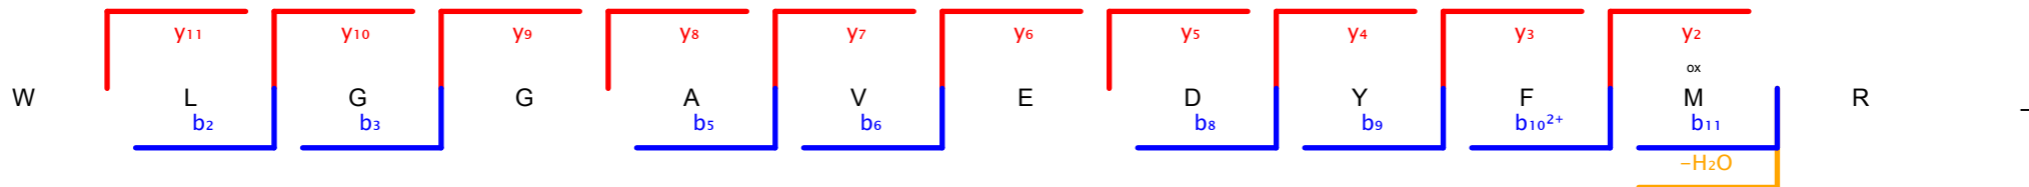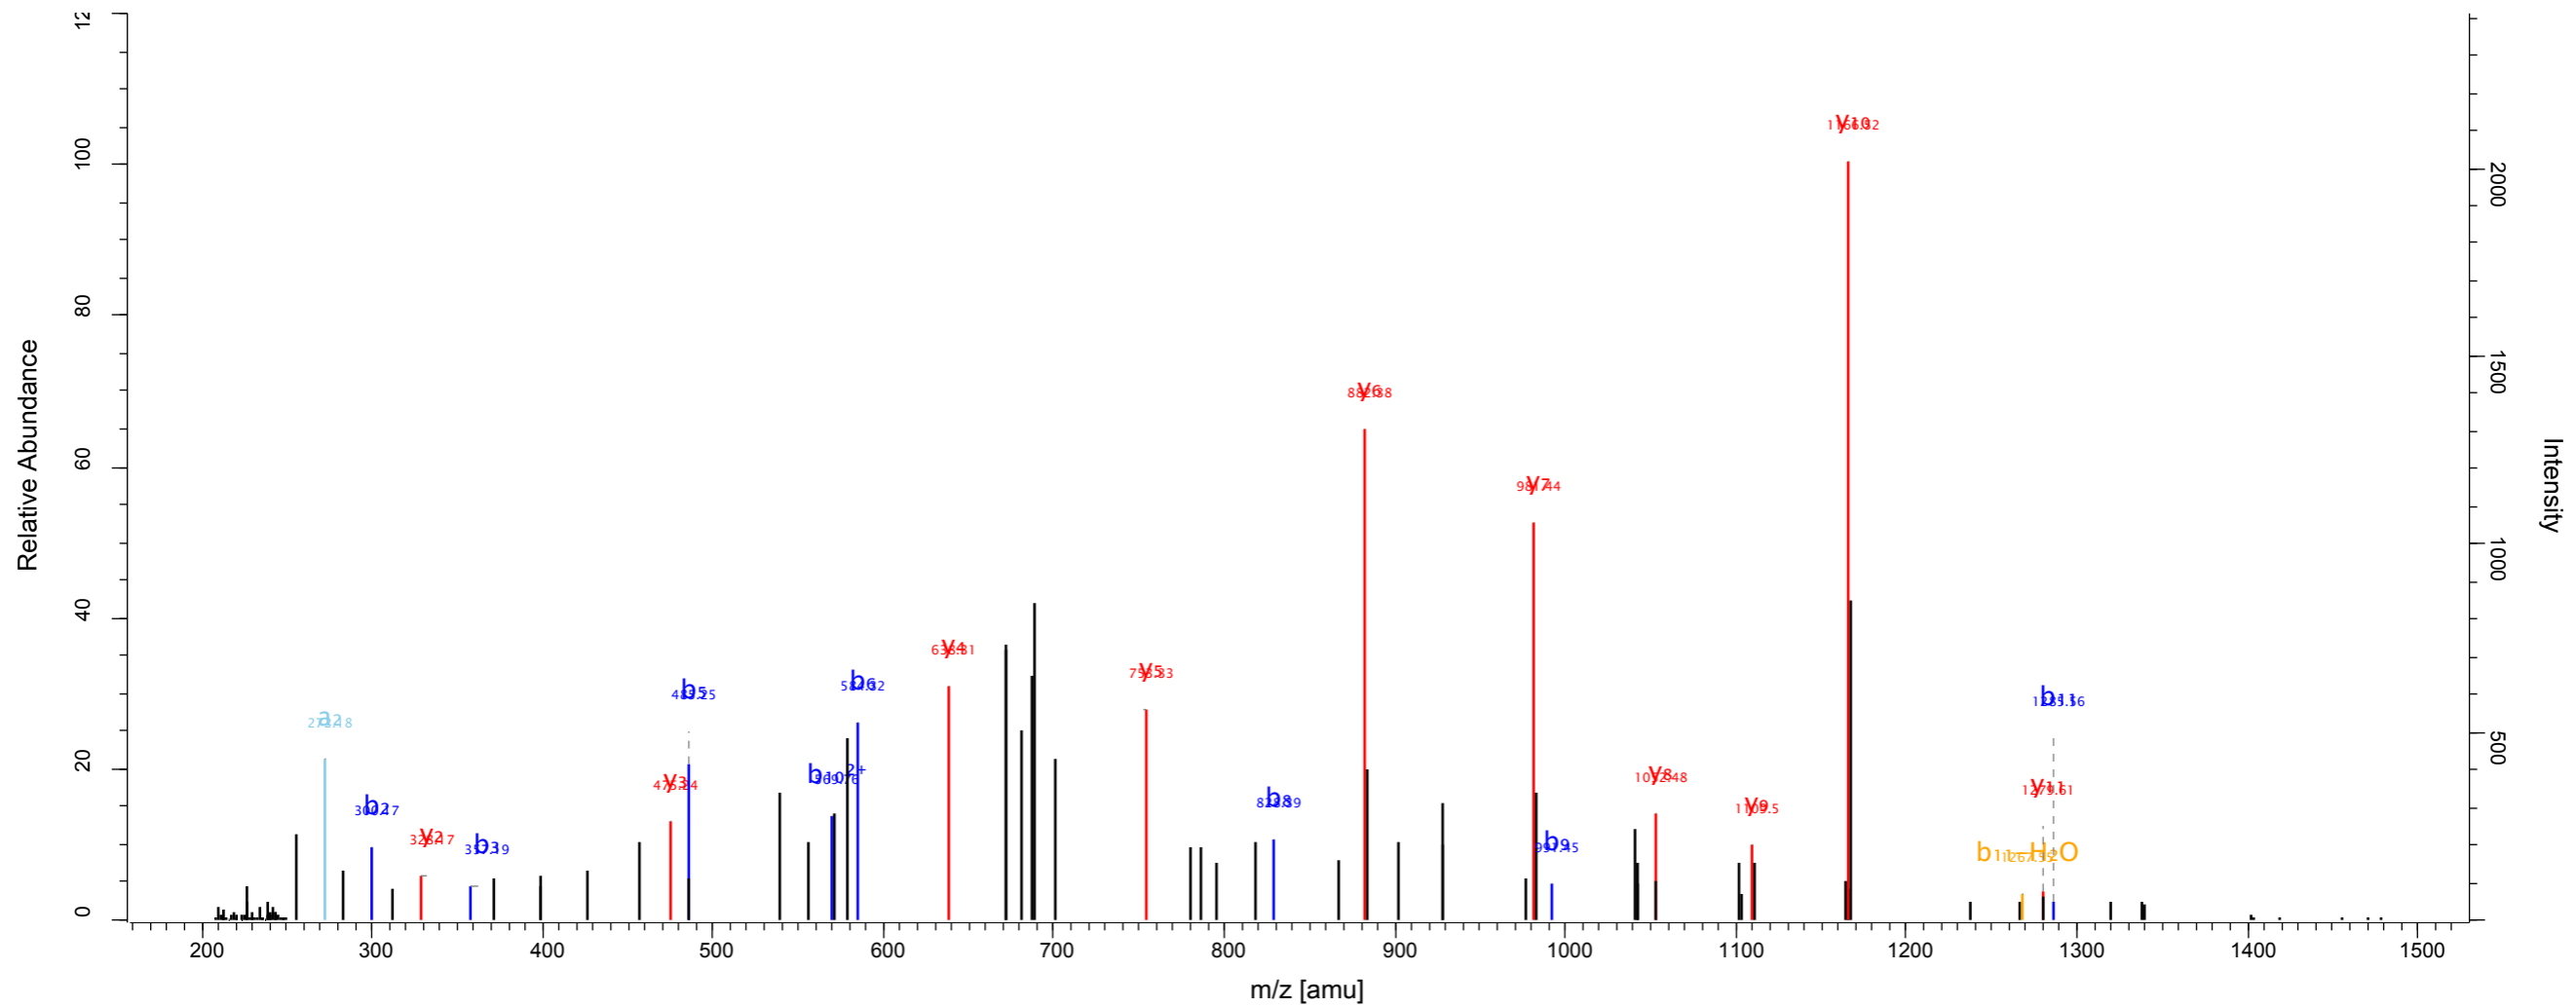

Scan number 8953 Raw file SKaraca\_LMB\_TCE\_Forward\_18\_191011\_rep1  
 Method ITMS; CID Pepti... 140.49

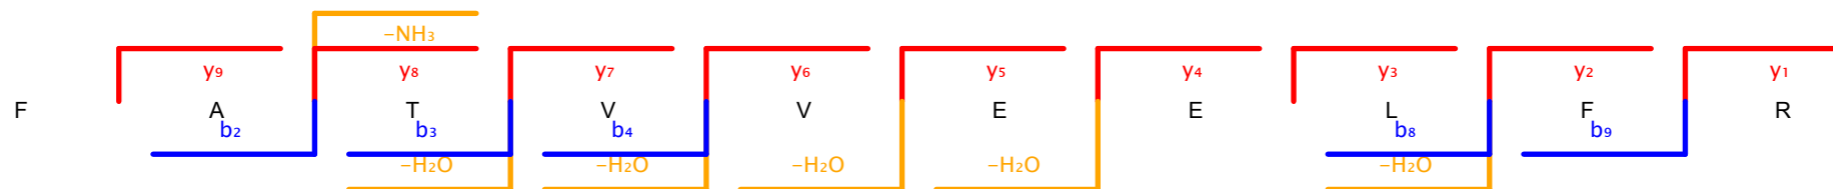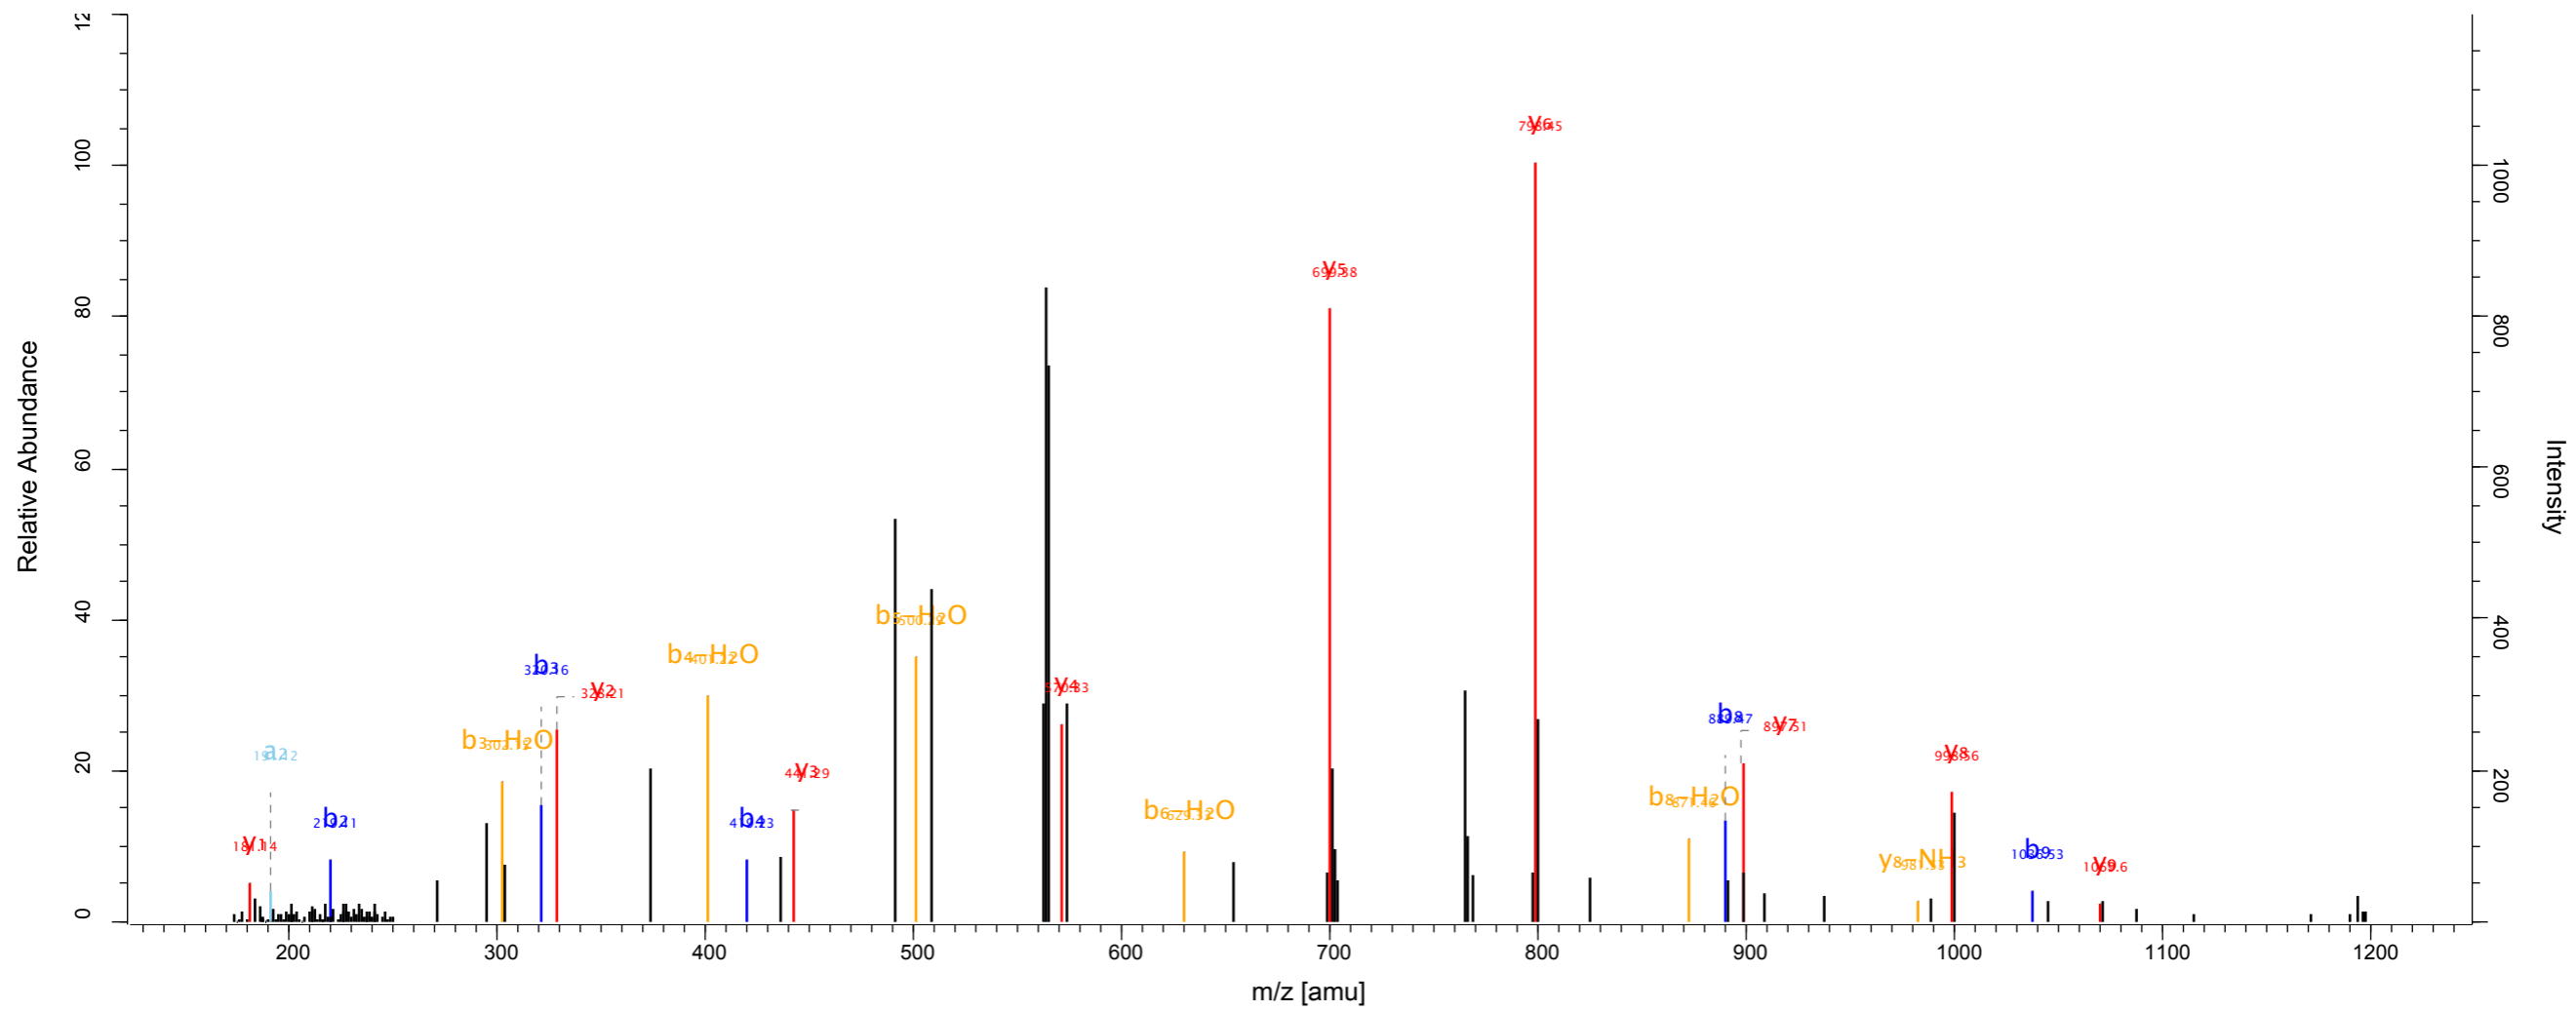



Scan number 1098 Raw file SKaraca\_LMB\_TCE\_Forward\_18\_191011\_rep2  
 Method ITMS; CID Pepti... 174.4

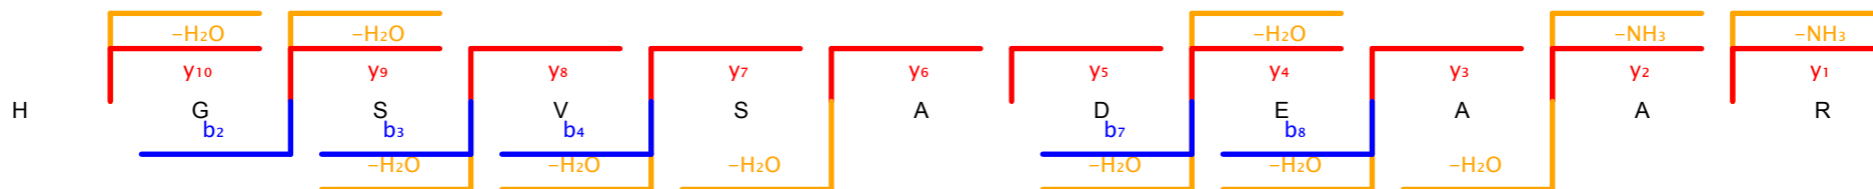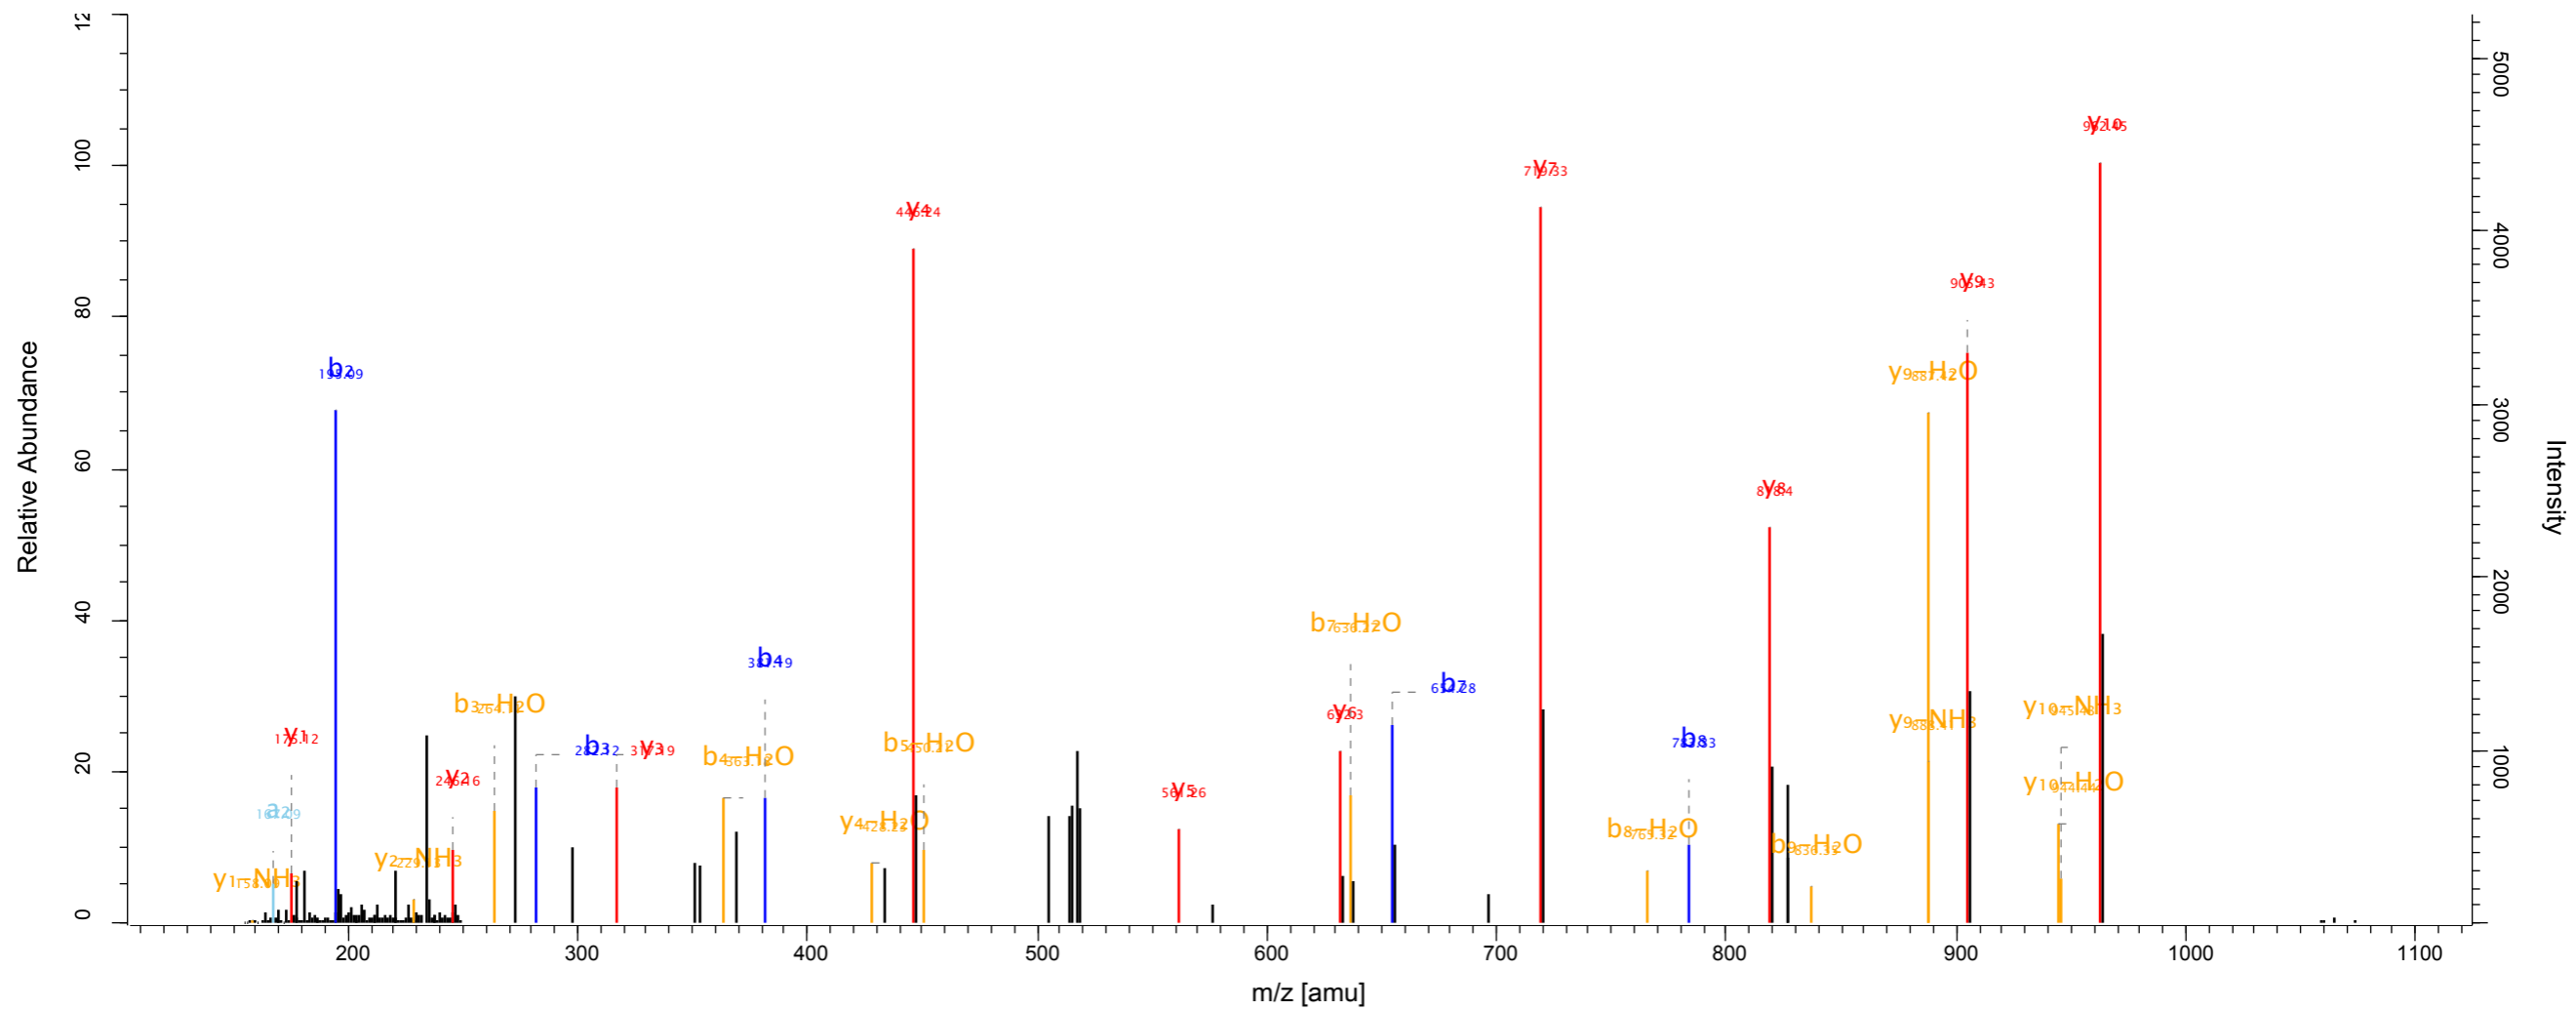

Scan number 2211 Raw file SKaraca\_LMB\_TCE\_Forward\_18\_191011\_rep2  
 Method ITMS; CID Pepti... 103.76

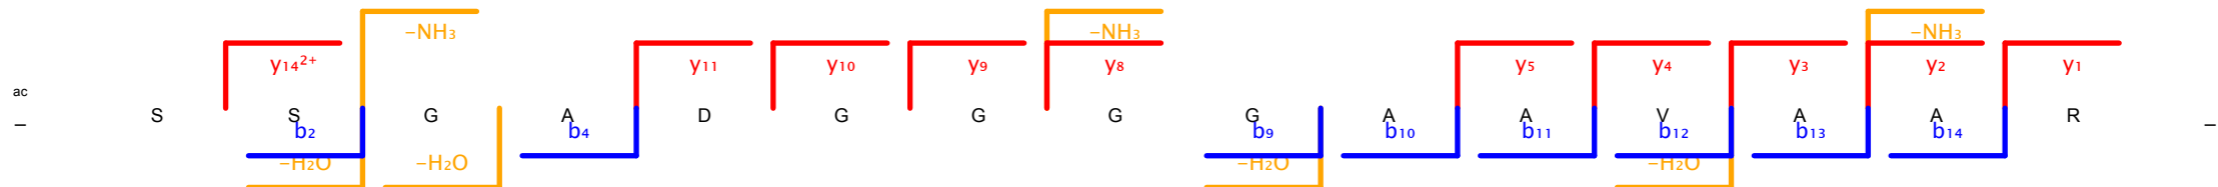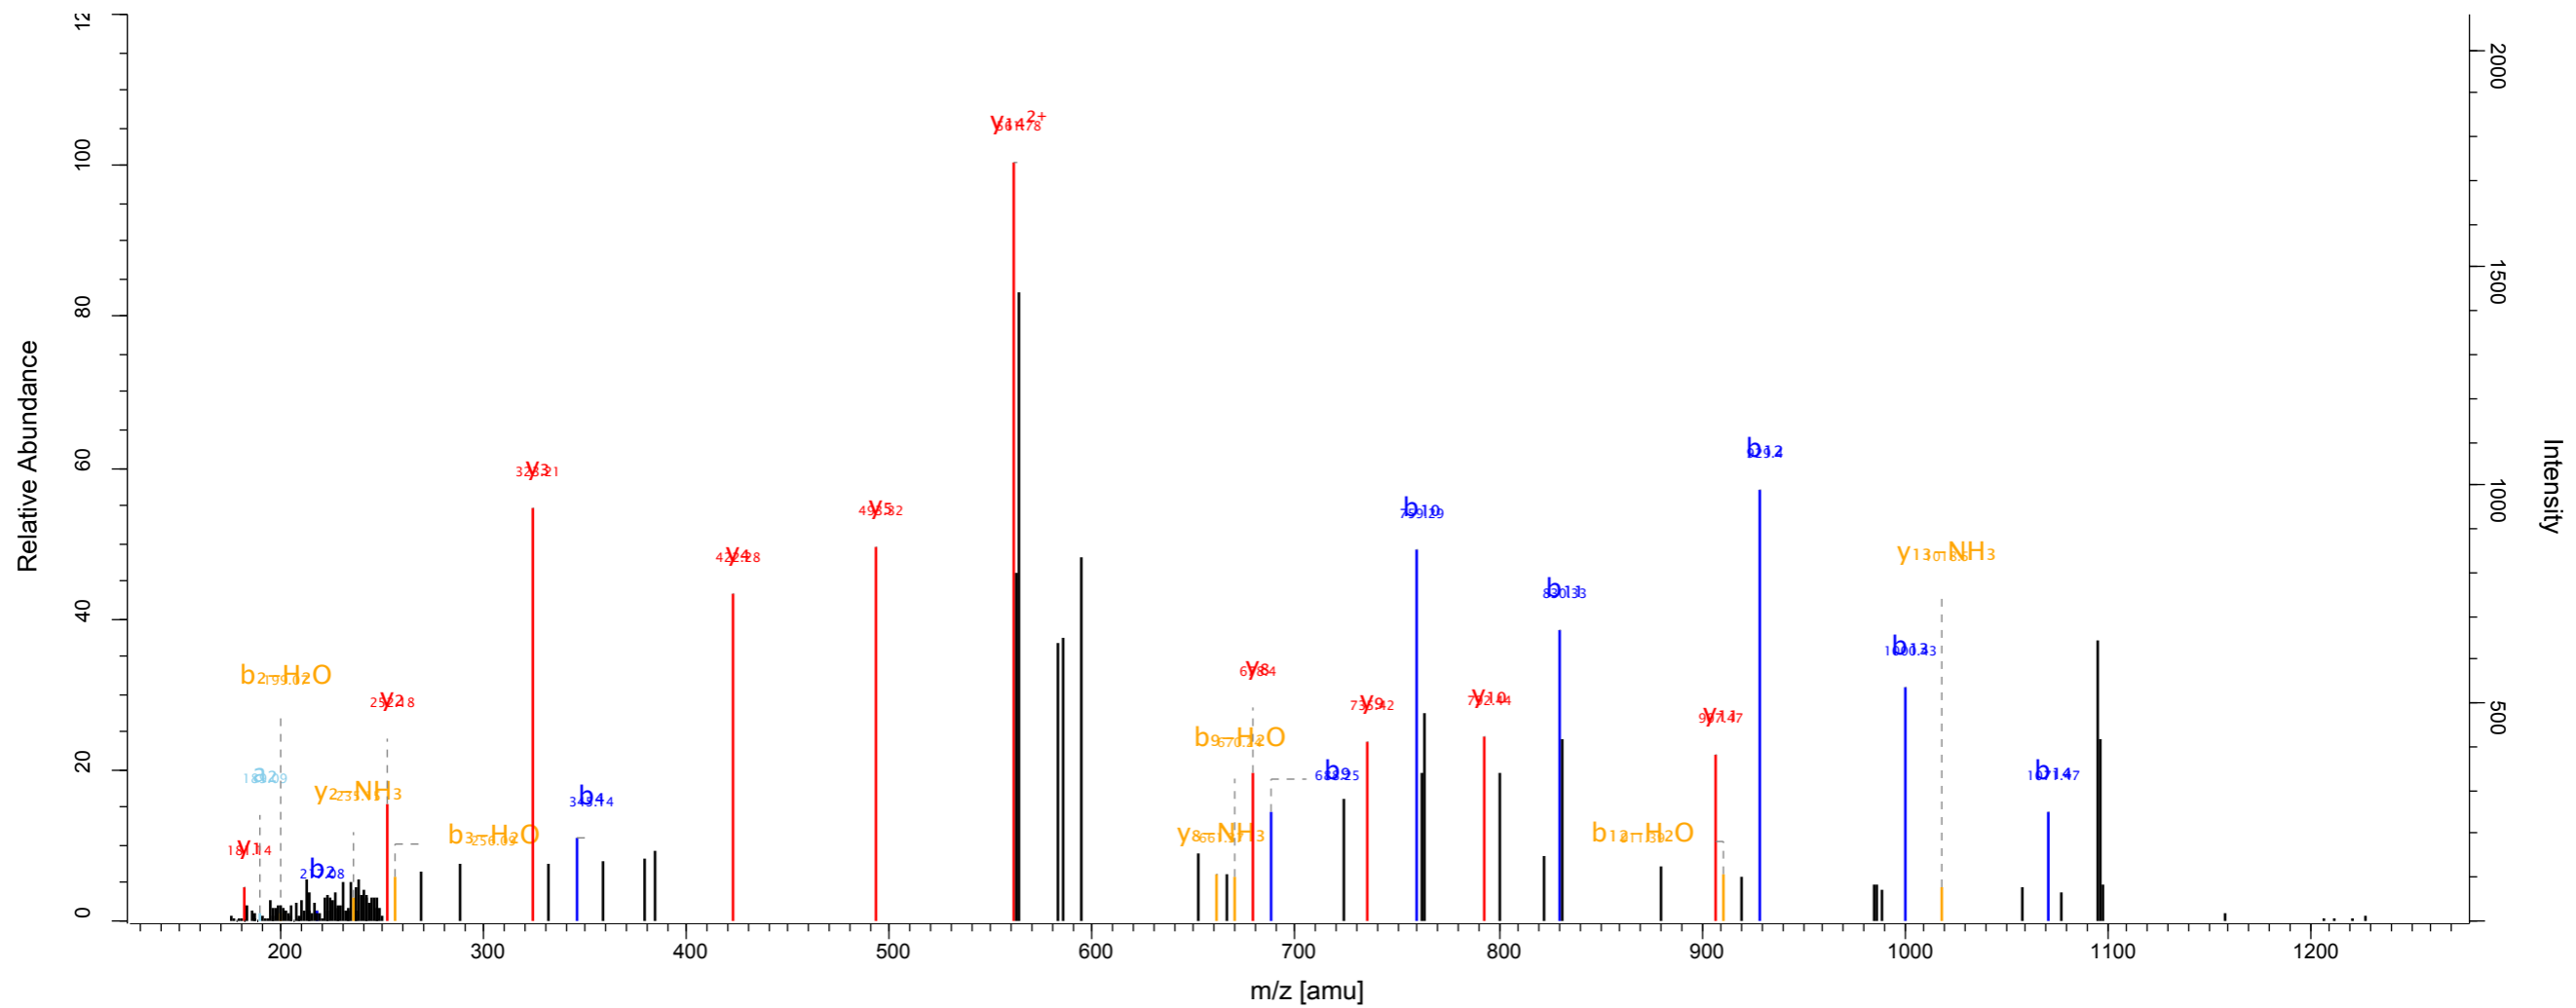

Scan number 2847 Raw file SKaraca\_LMB\_TCE\_Forward\_18\_191011\_rep2  
 Method ITMS; CID Pepti... 175.38

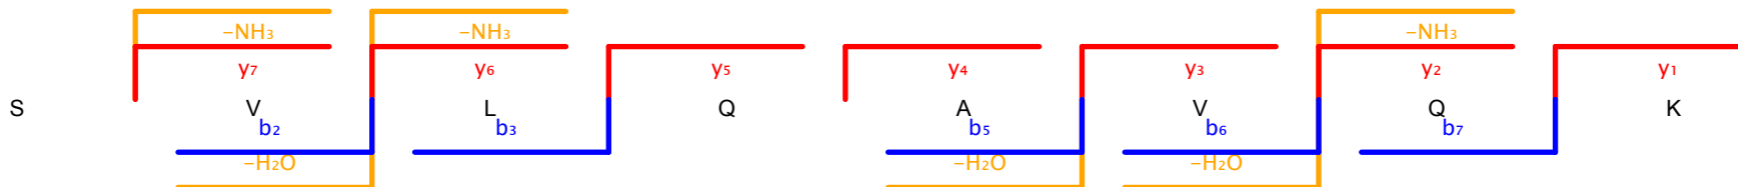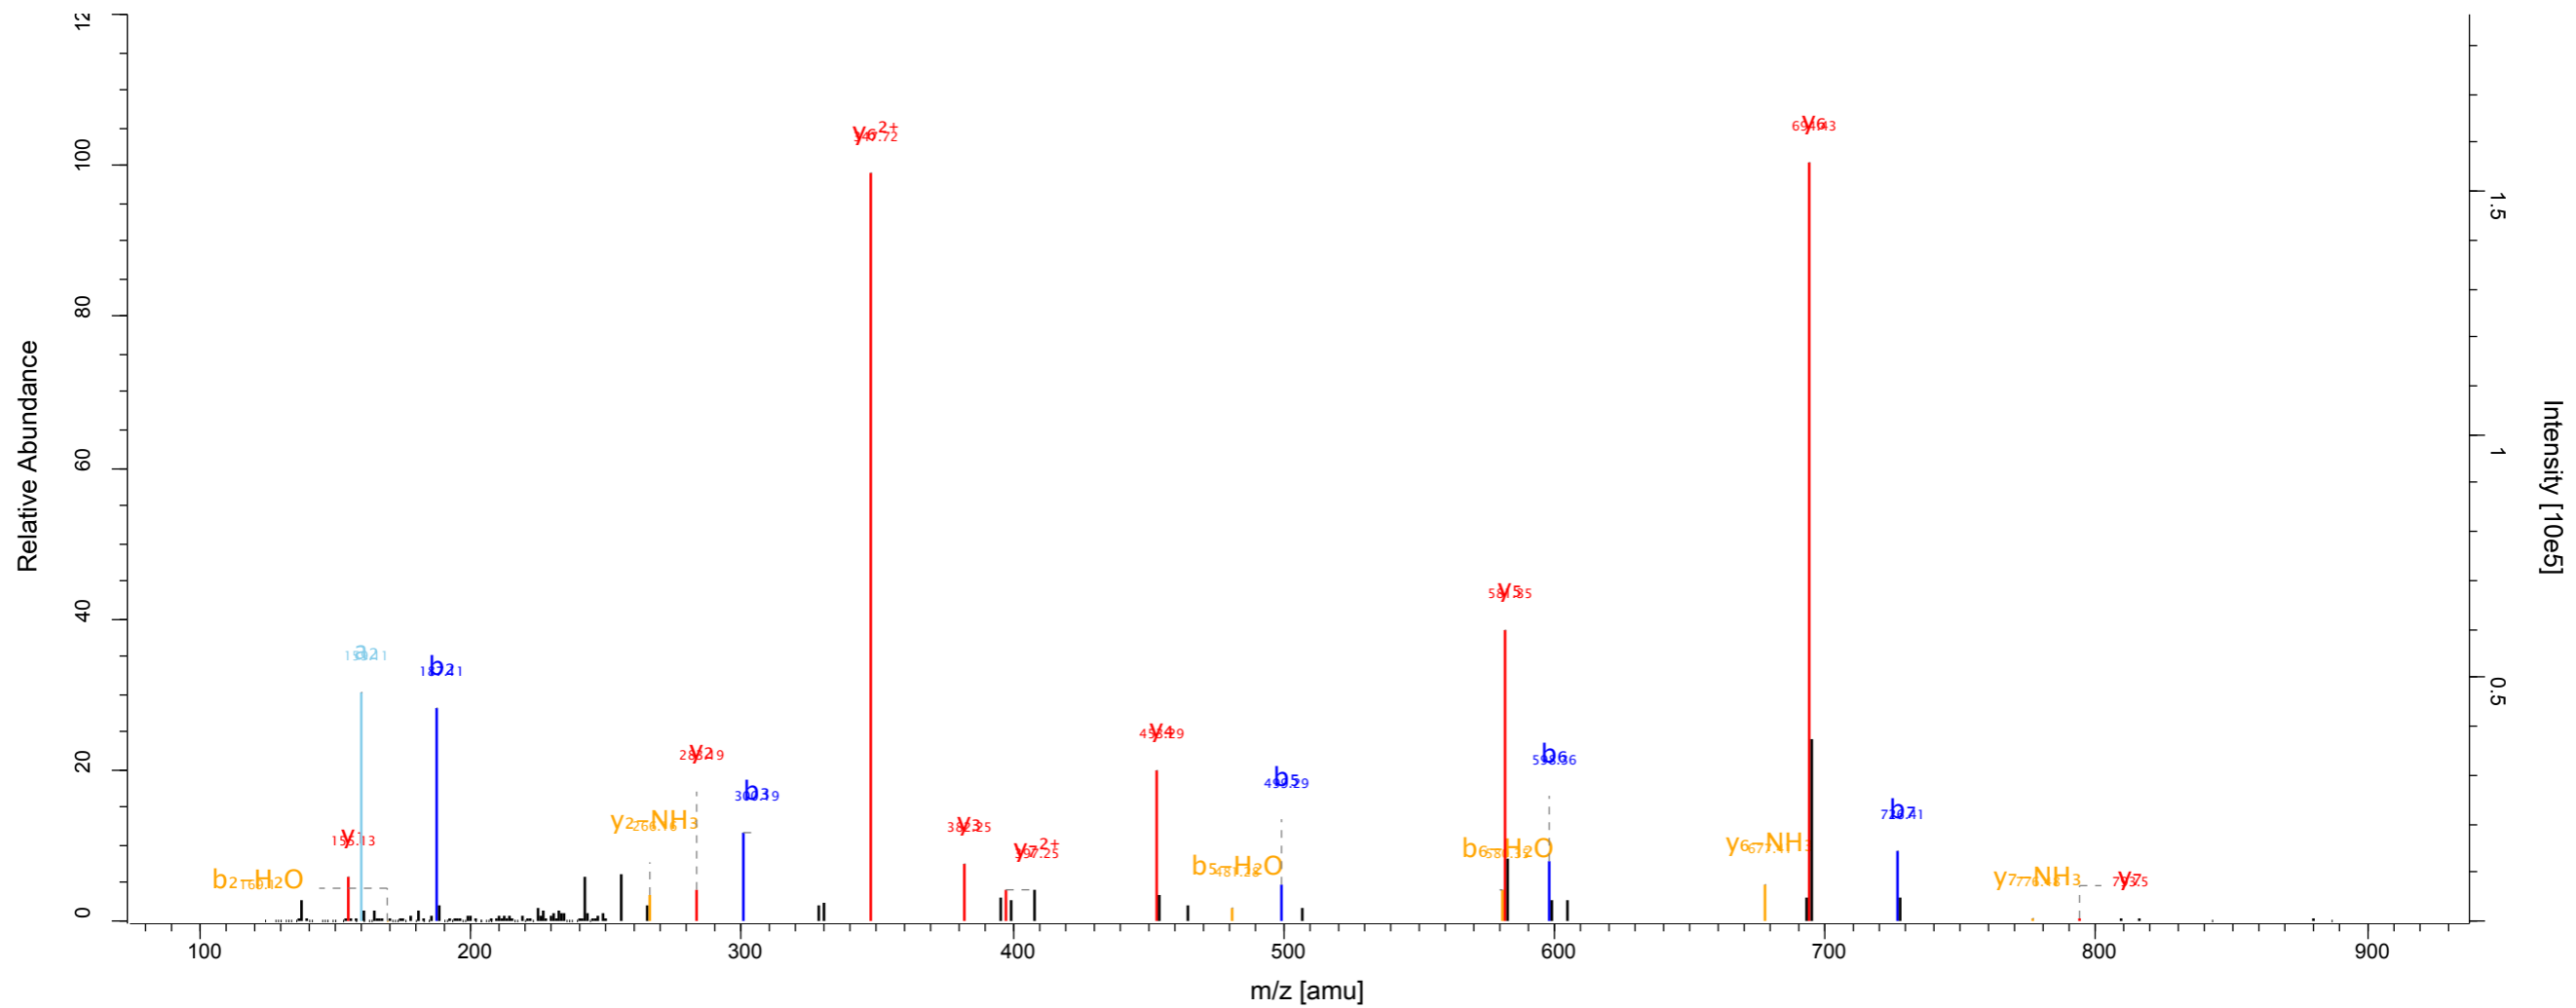

|             |           |          |                                        |
|-------------|-----------|----------|----------------------------------------|
| Scan number | 7876      | Raw file | SKaraca_LMB_TCE_Forward_18_191011_rep2 |
| Method      | ITMS; CID | Pepti... | 148.52                                 |

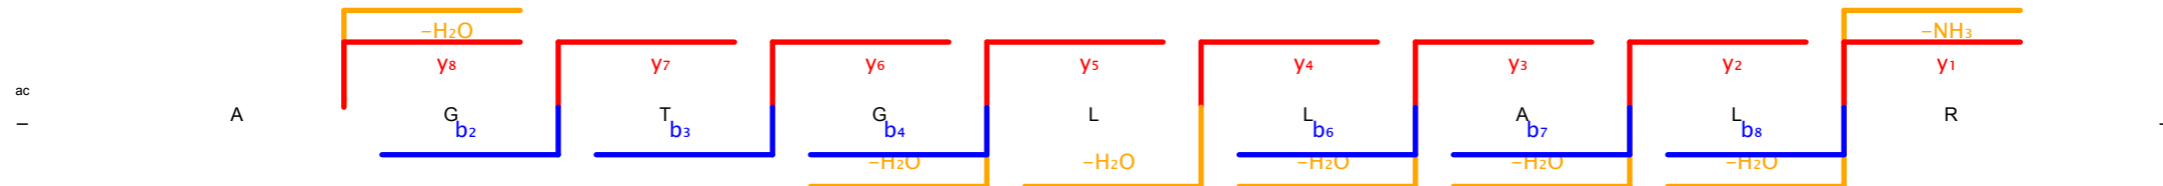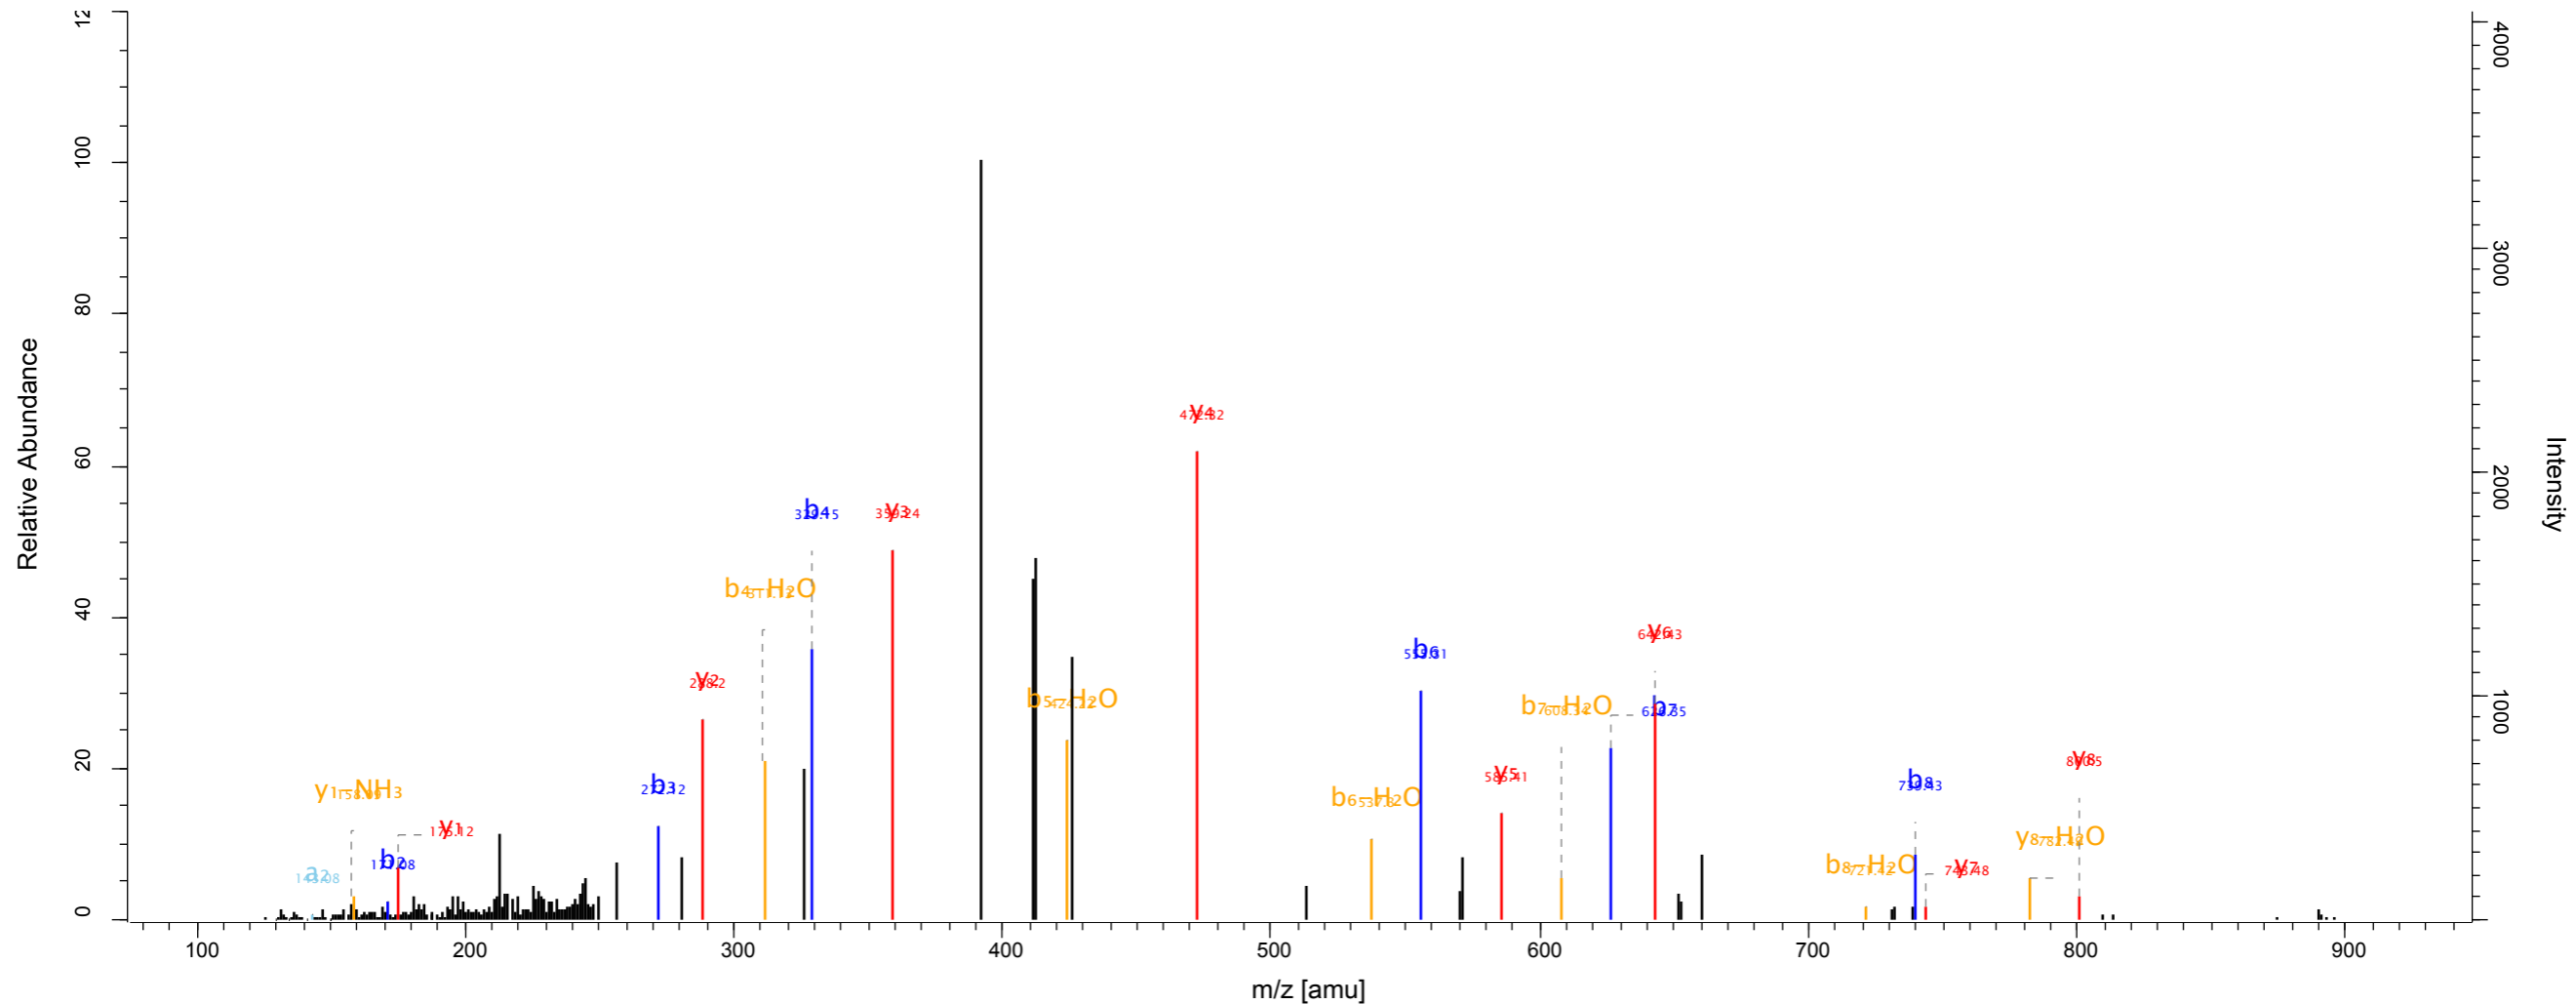

Scan number 8593 Raw file SKaraca\_LMB\_TCE\_Forward\_18\_191011\_rep2  
 Method ITMS; CID Pepti... 183.77

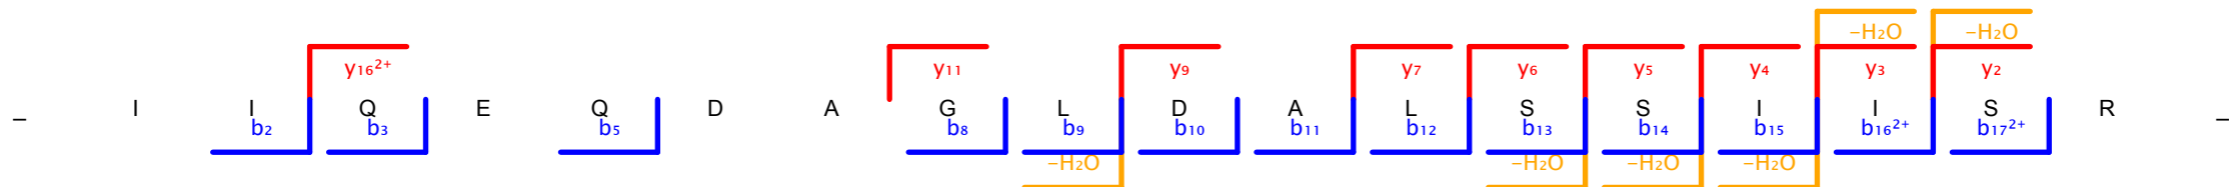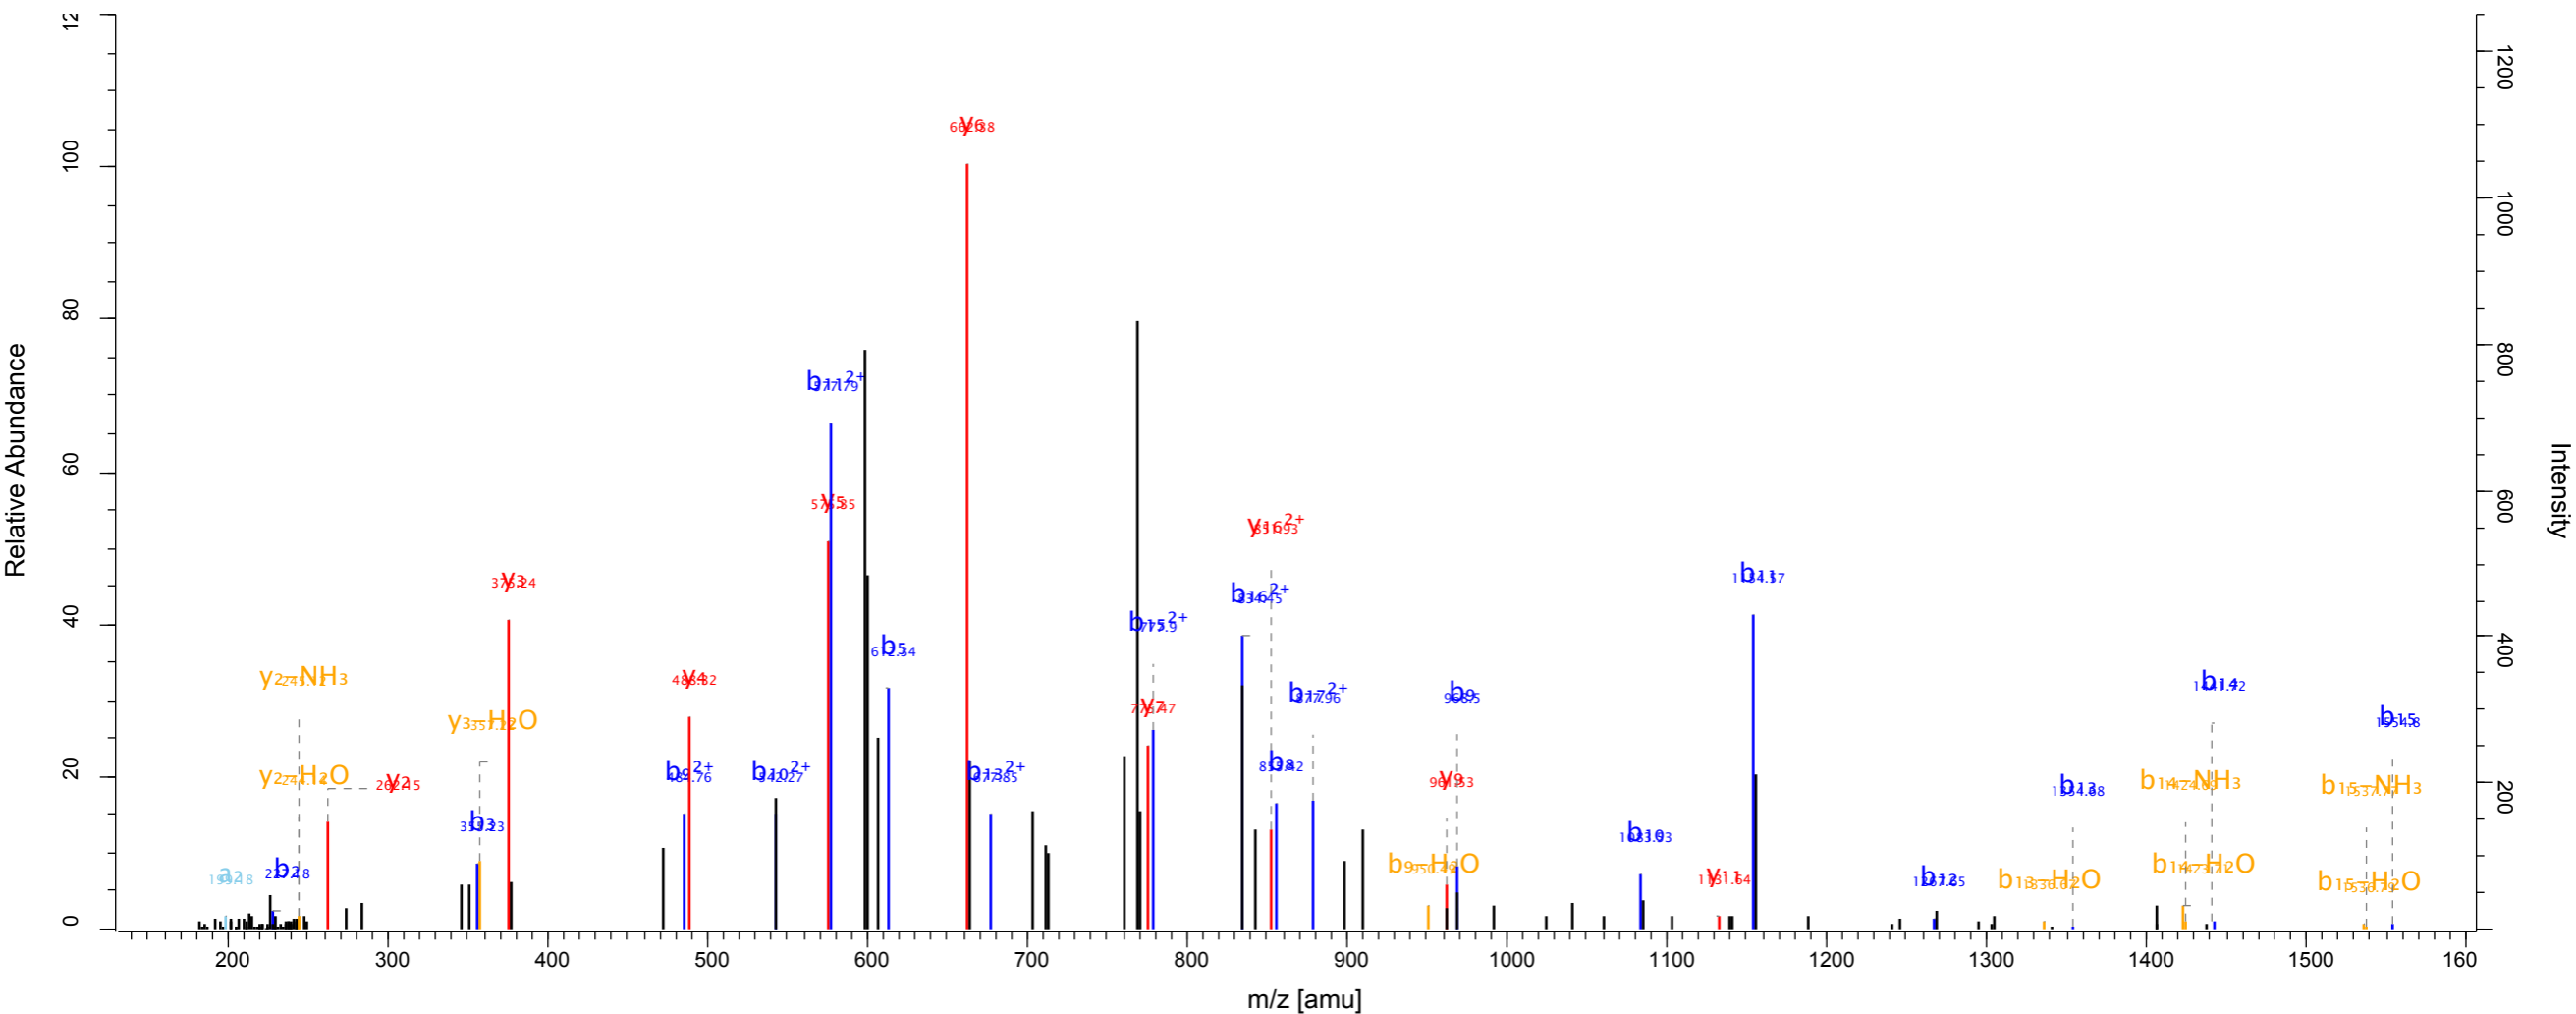

Scan number 879 Raw file SKaraca\_LMB\_TCE\_Forward\_18\_191011\_rep2  
 Method ITMS; CID Pepti... 103.88

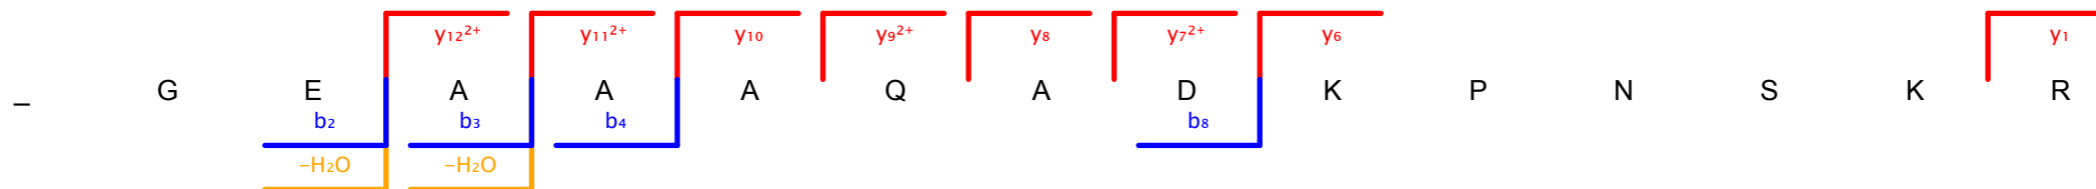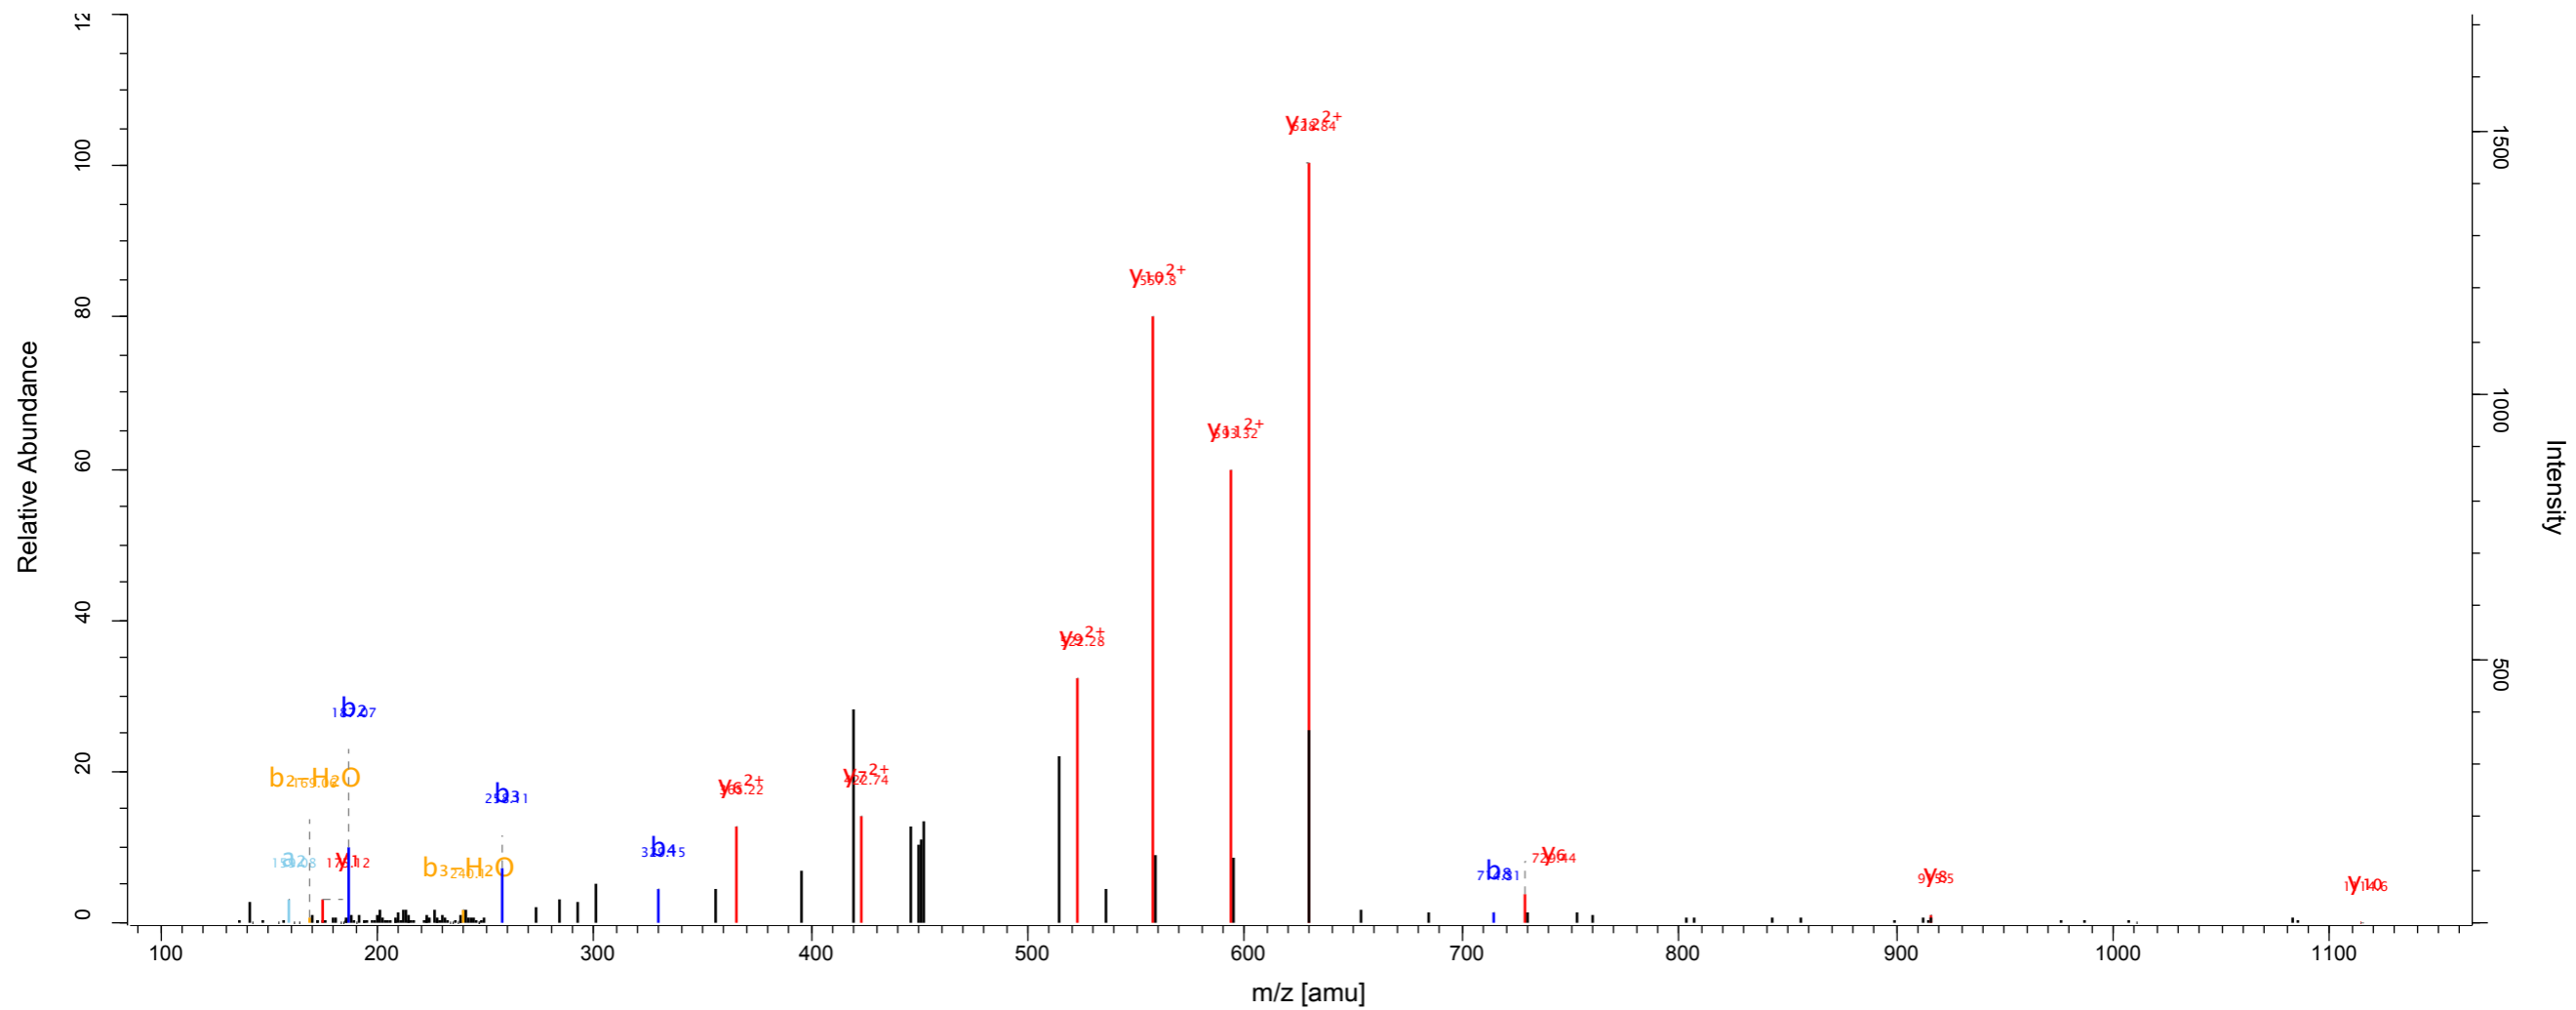

|             |           |          |                                        |
|-------------|-----------|----------|----------------------------------------|
| Scan number | 9156      | Raw file | SKaraca_LMB_TCE_Forward_18_191011_rep2 |
| Method      | ITMS; CID | Pepti... | 171.05                                 |

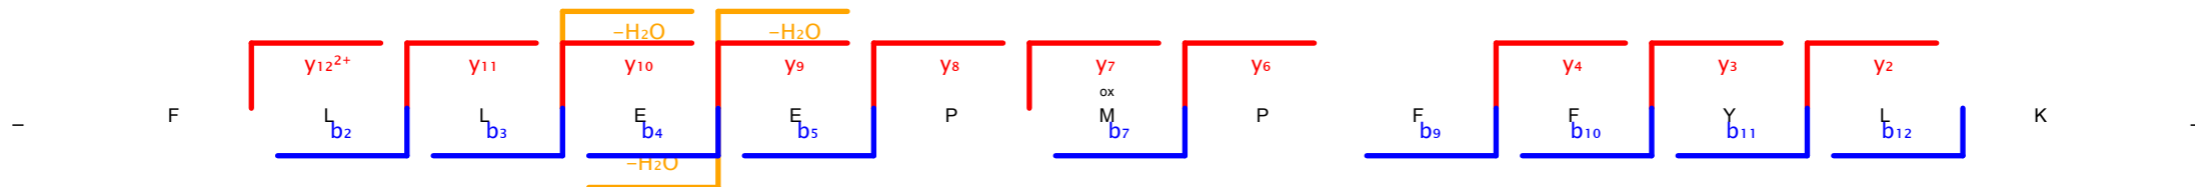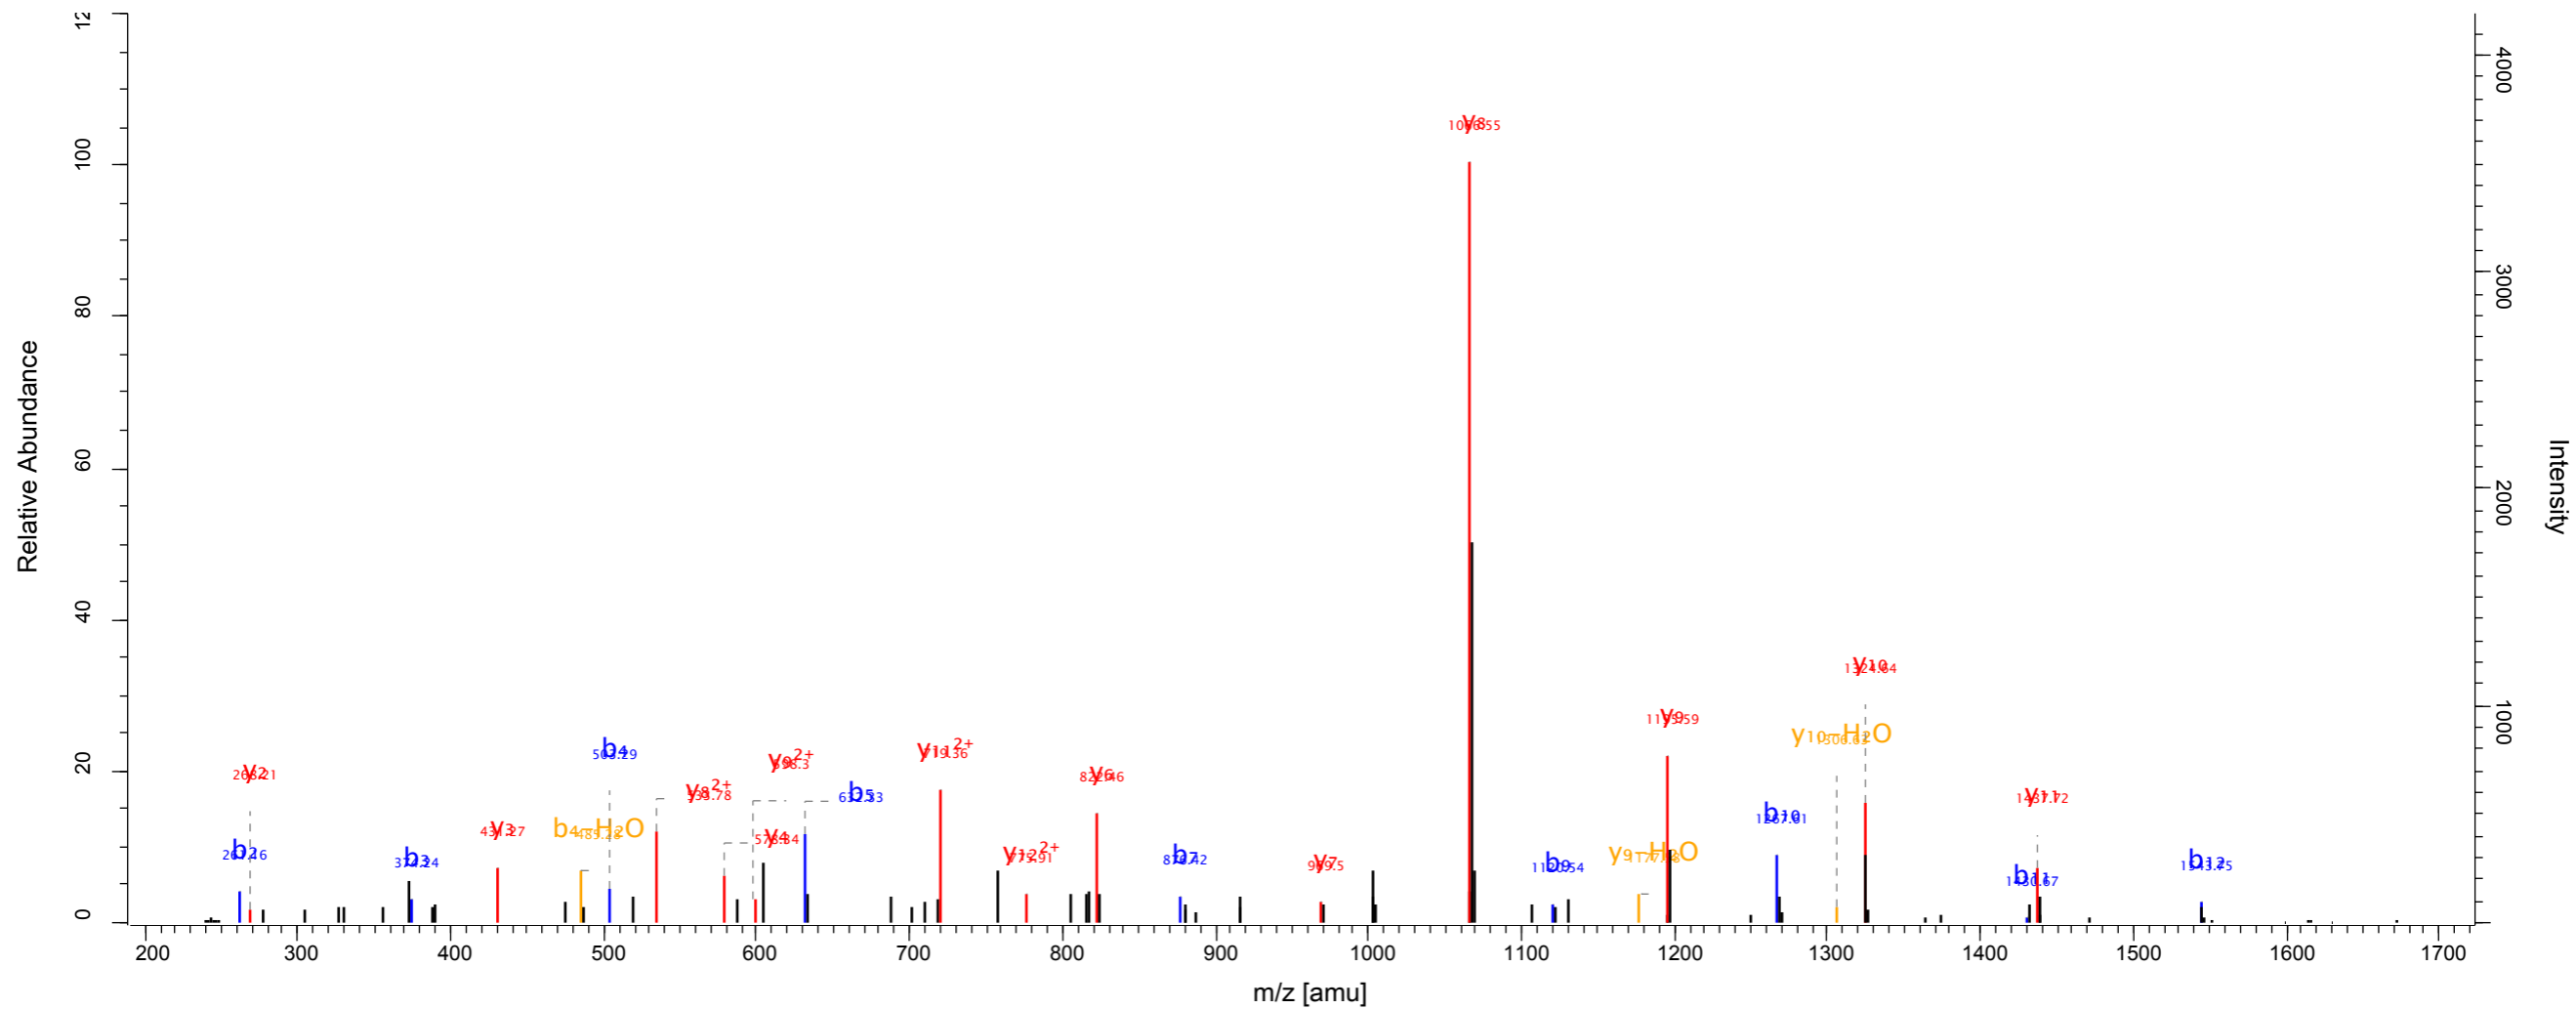

Scan number 2997 Raw file SKaraca\_LMB\_TCE\_Forward\_19\_191011\_rep2  
Method ITMS; CID Pepti... 128.68

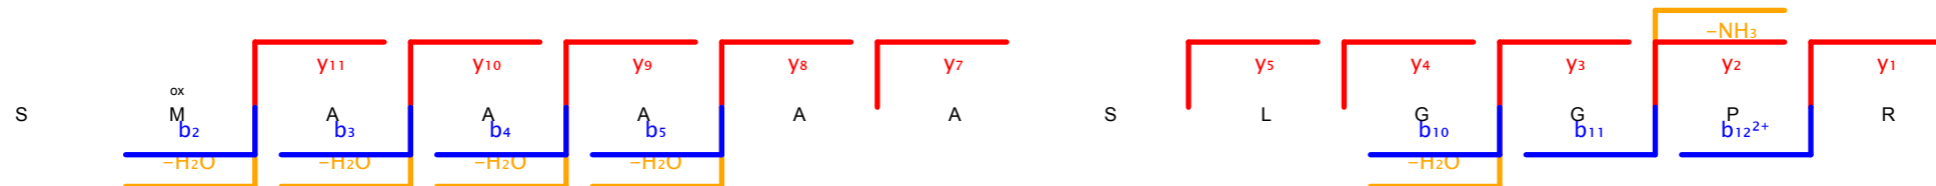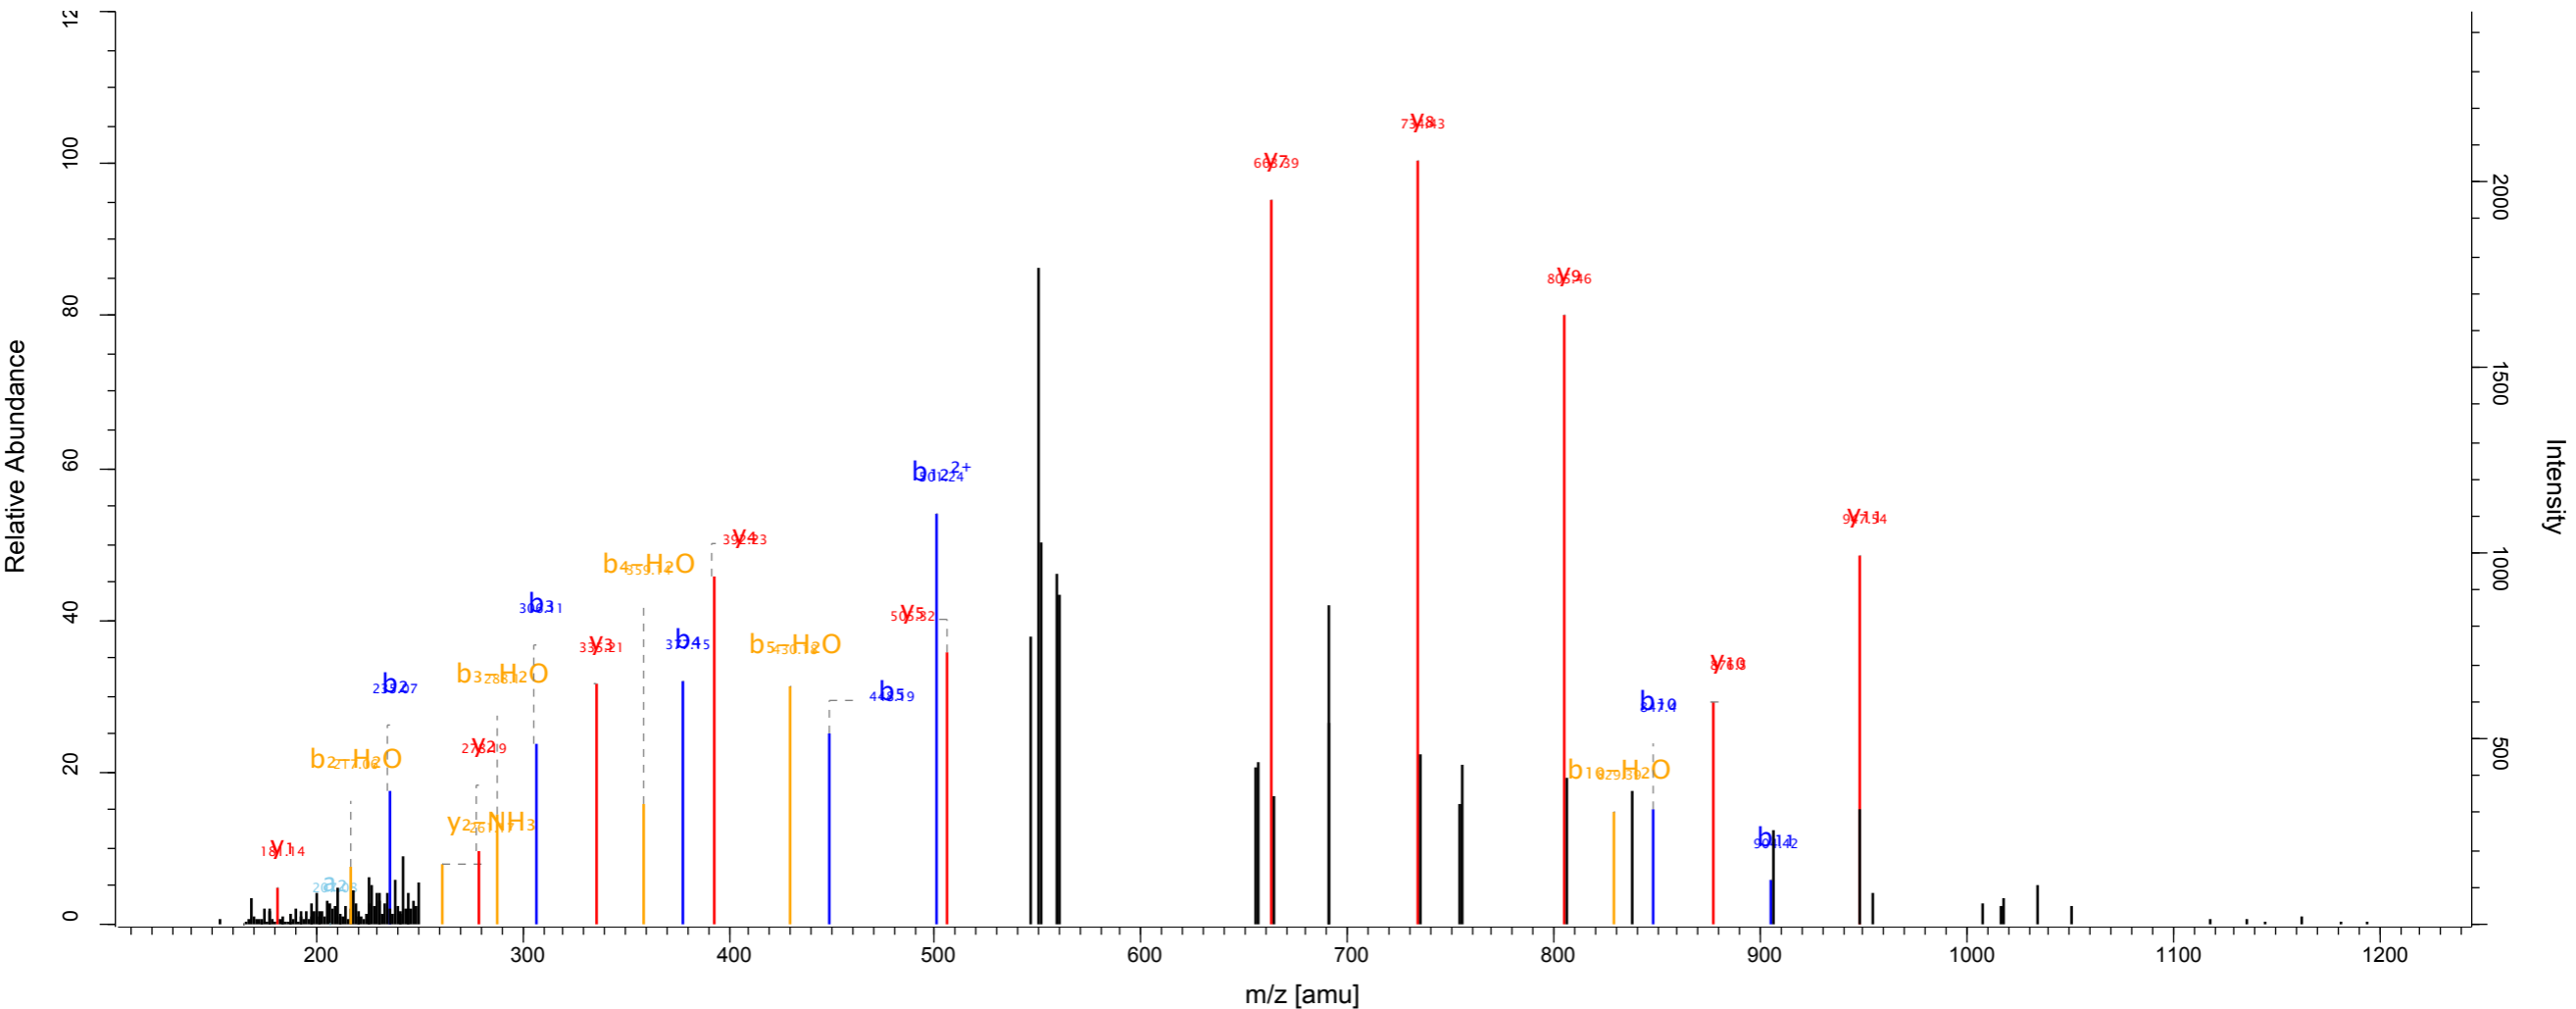



|             |           |          |                                        |
|-------------|-----------|----------|----------------------------------------|
| Scan number | 6427      | Raw file | SKaraca_LMB_TCE_Forward_19_191011_rep3 |
| Method      | ITMS; CID | Pepti... | 158.76                                 |

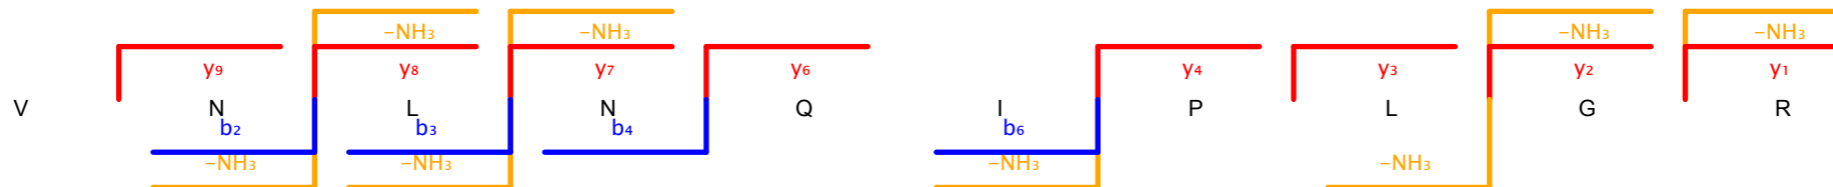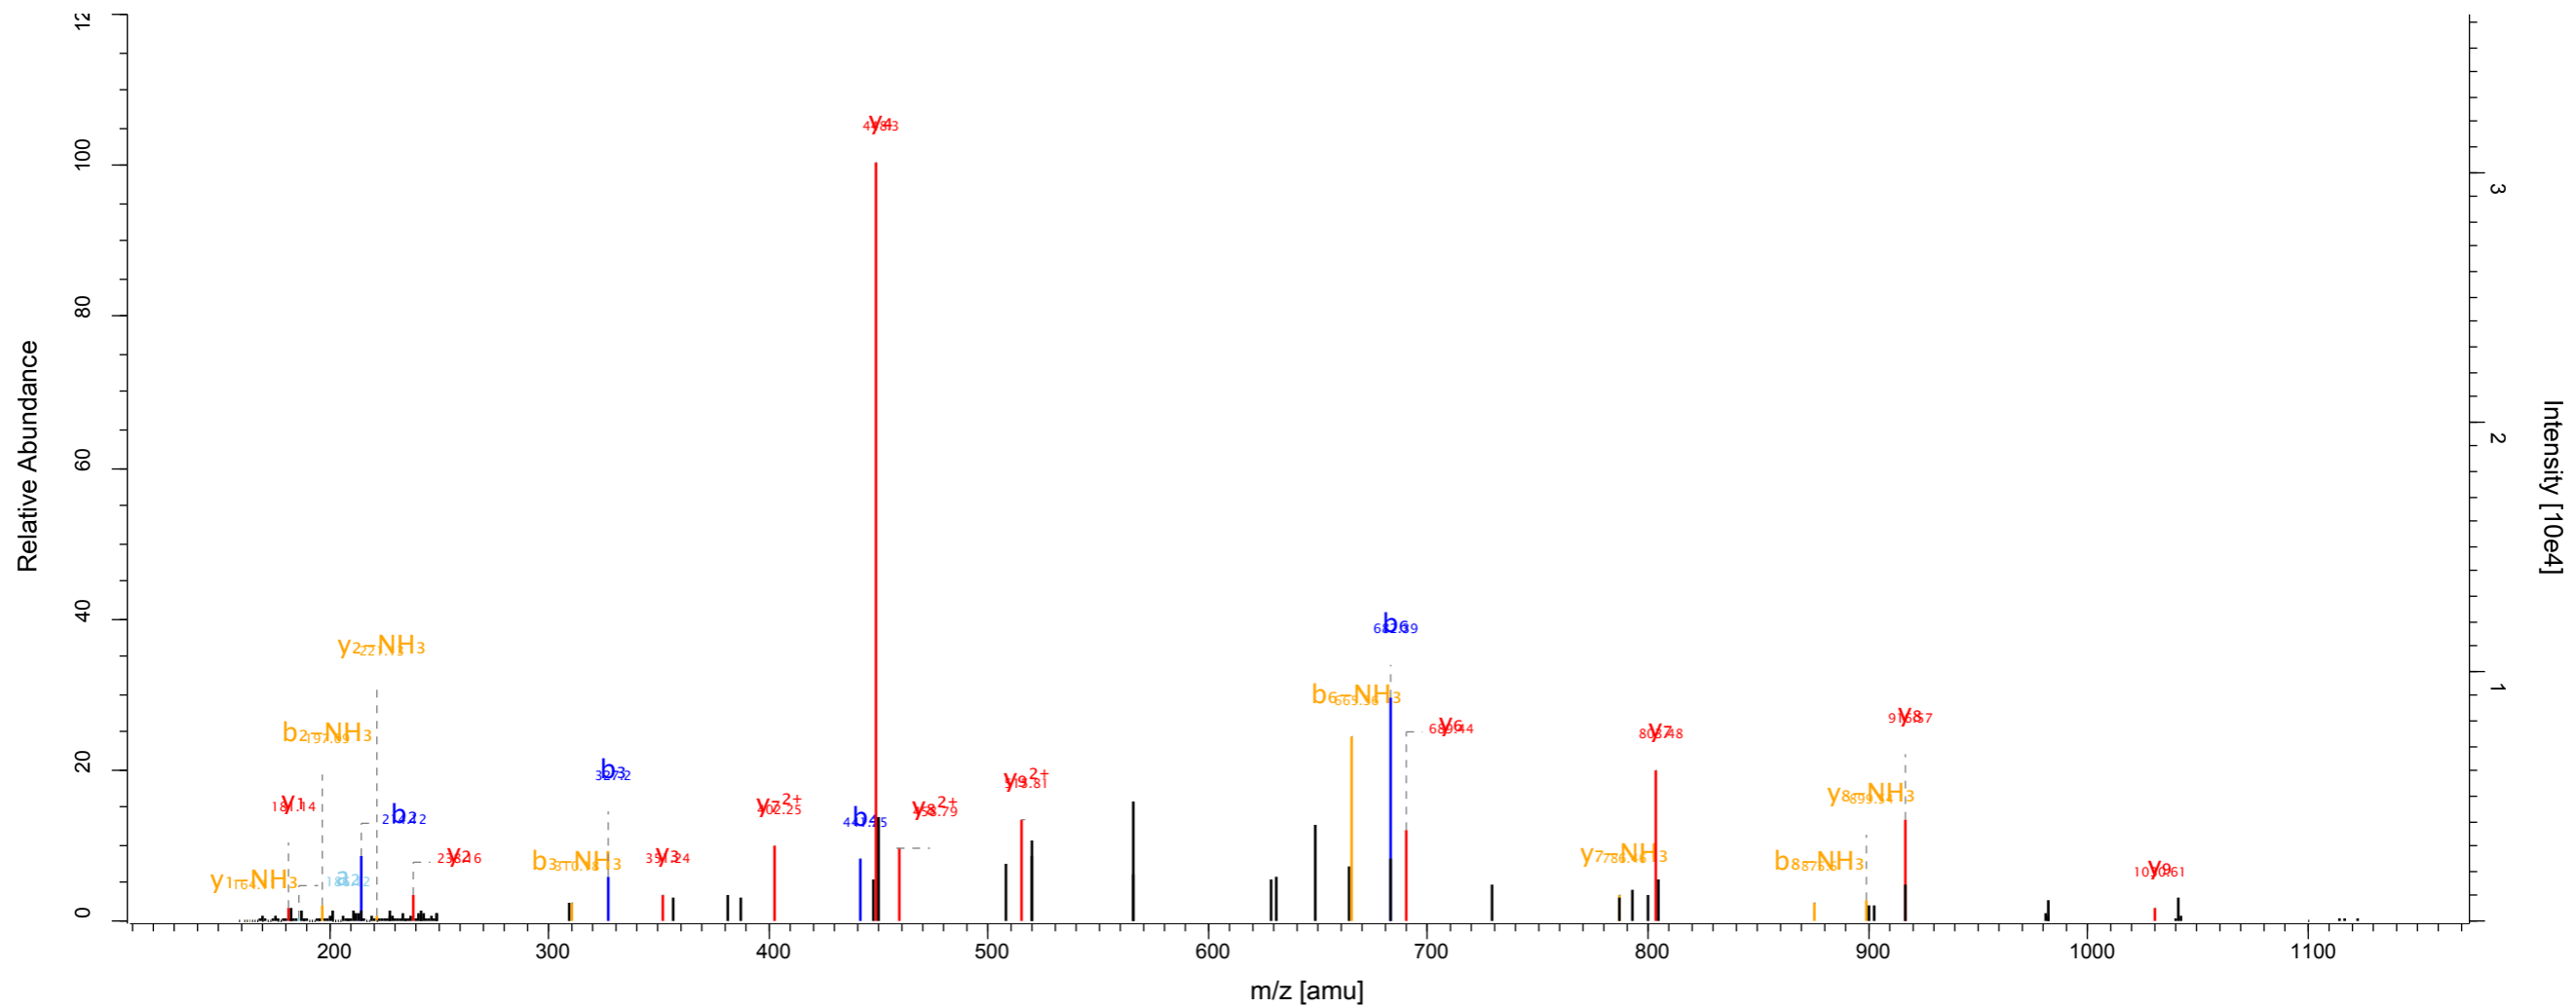

Scan number 7925 Raw file SKaraca\_LMB\_TCE\_Forward\_19\_191011\_rep3  
 Method ITMS; CID Pepti... 152

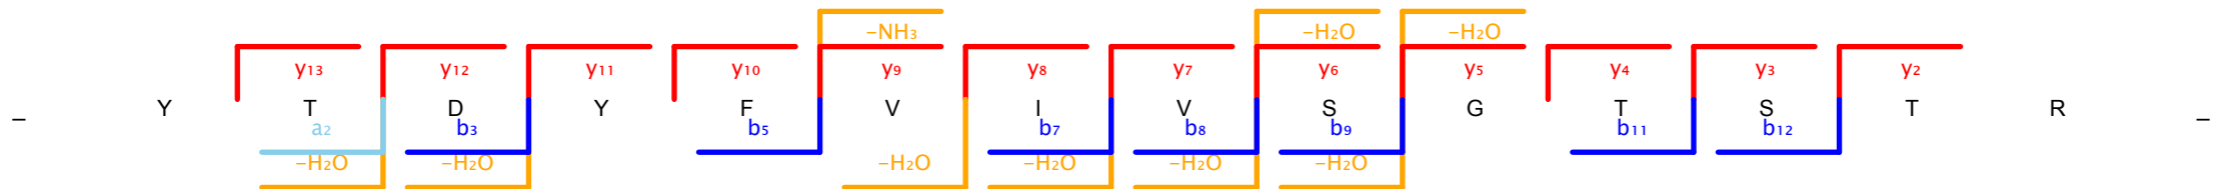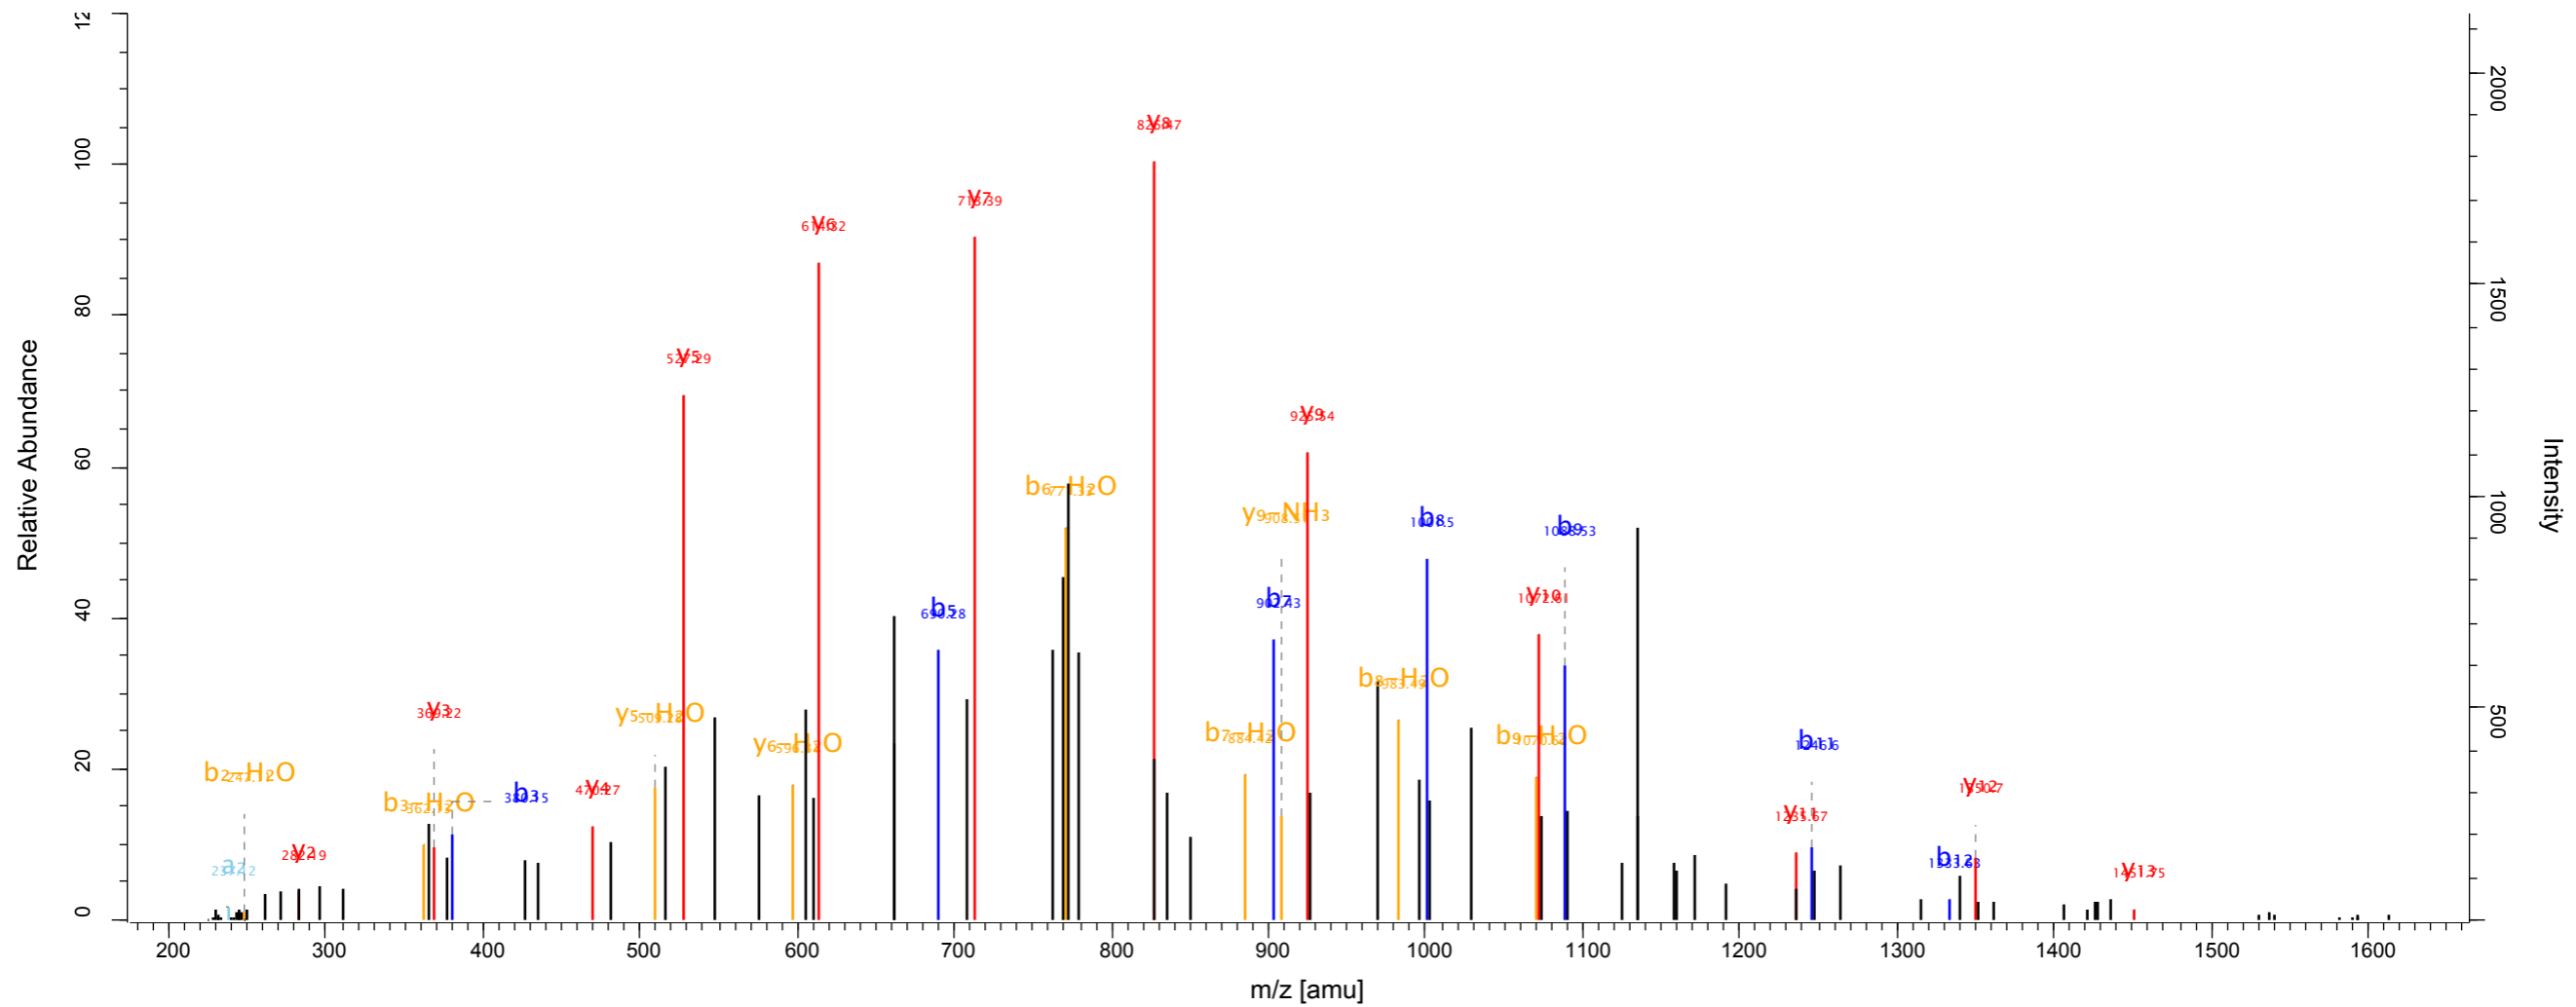

Scan number 3475 Raw file SKaraca\_LMB\_TCE\_Forward\_20\_191011\_rep1  
 Method ITMS; CID Pepti... 245.4

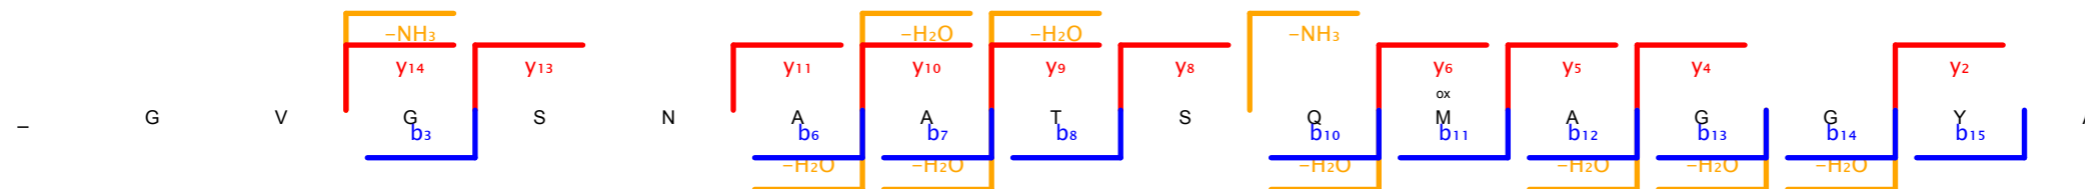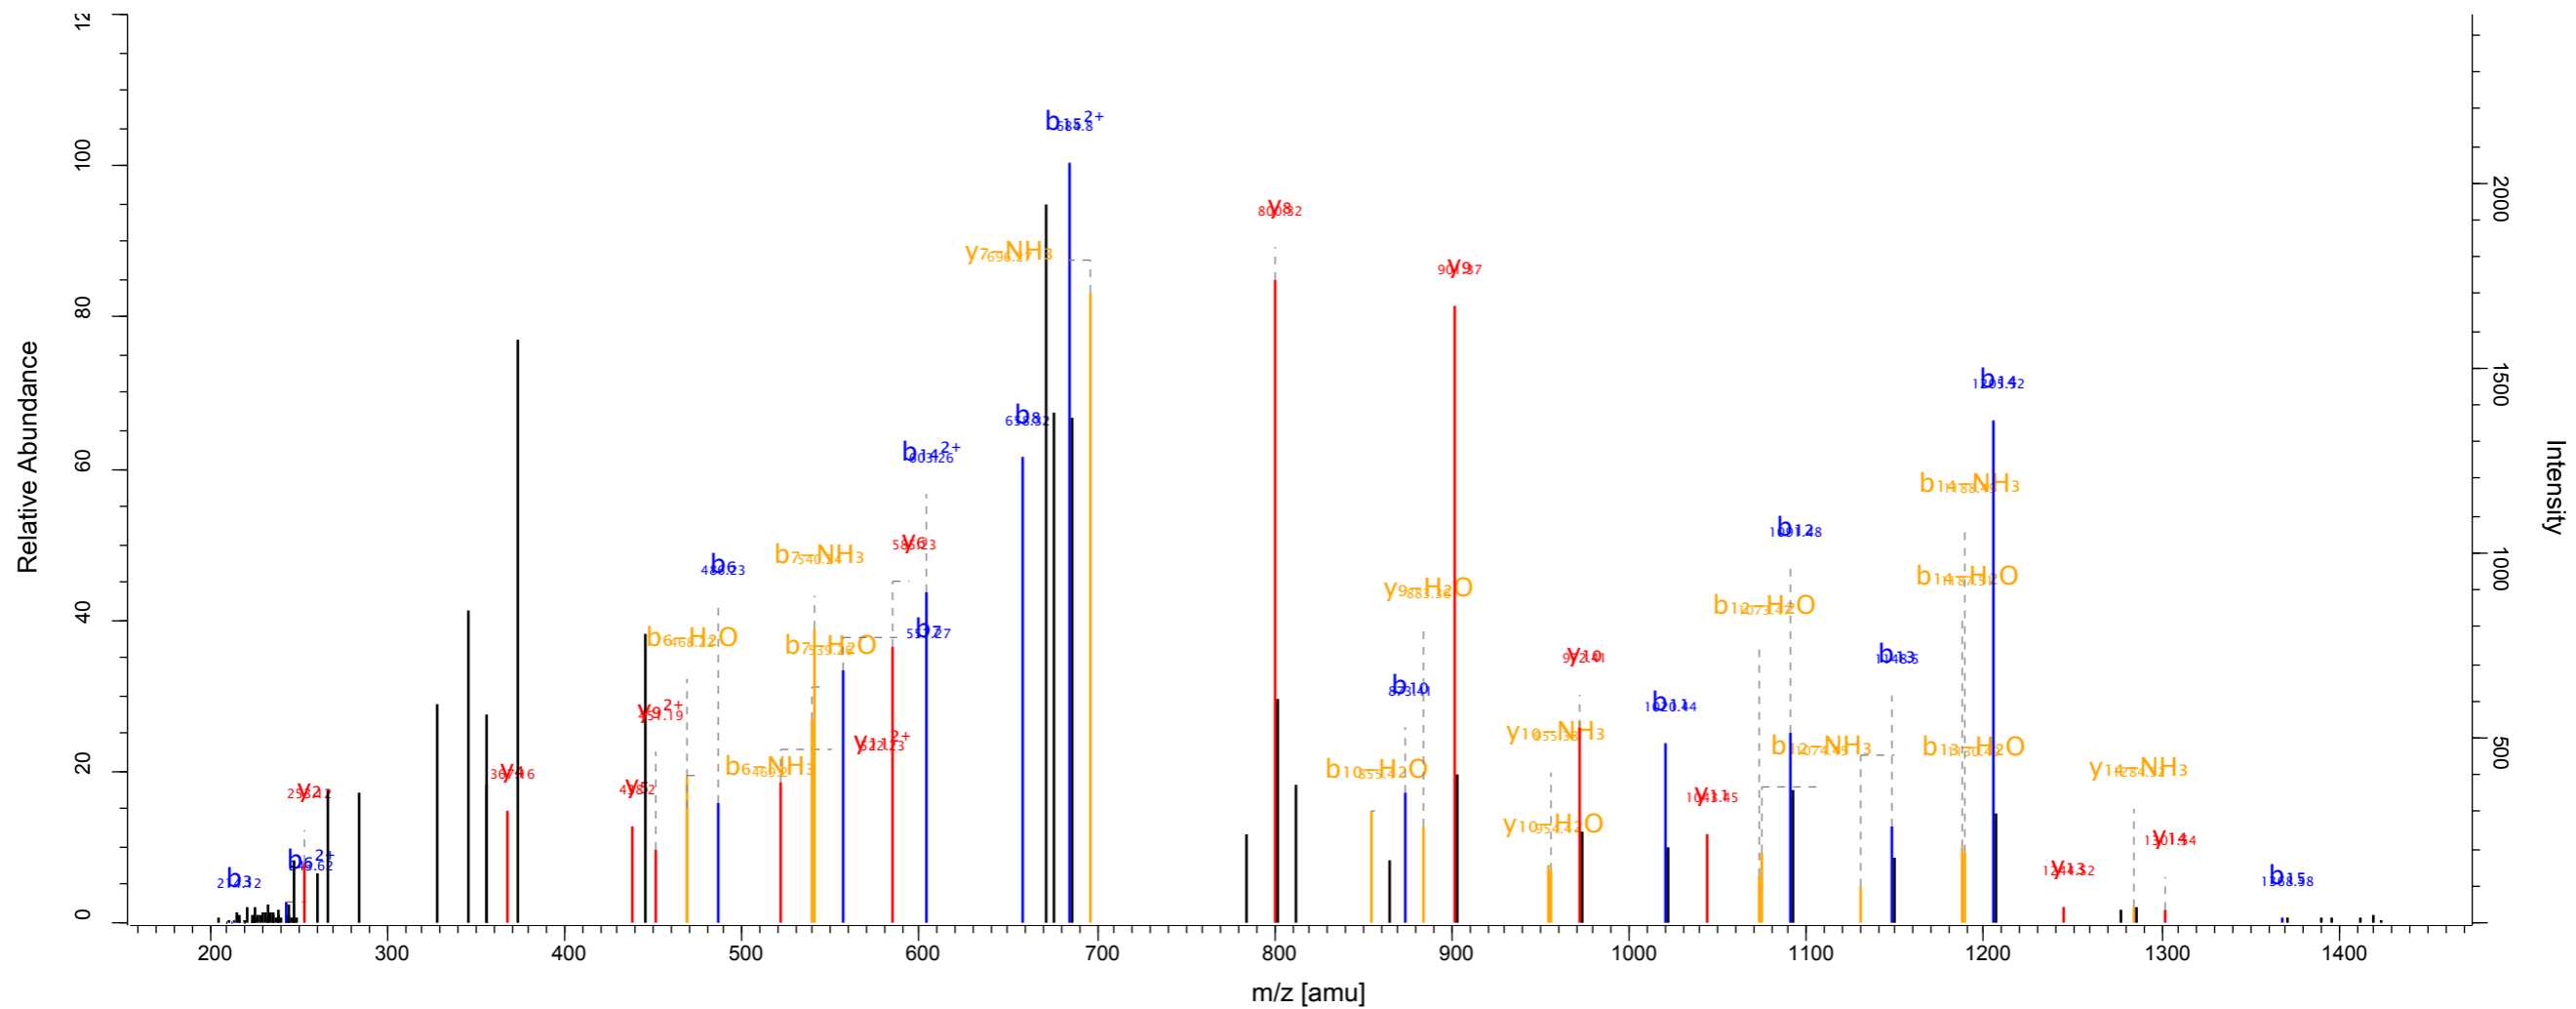

Scan number 7491 Raw file SKaraca\_LMB\_TCE\_Forward\_20\_191011\_rep1  
 Method ITMS; CID Pepti... 179.42

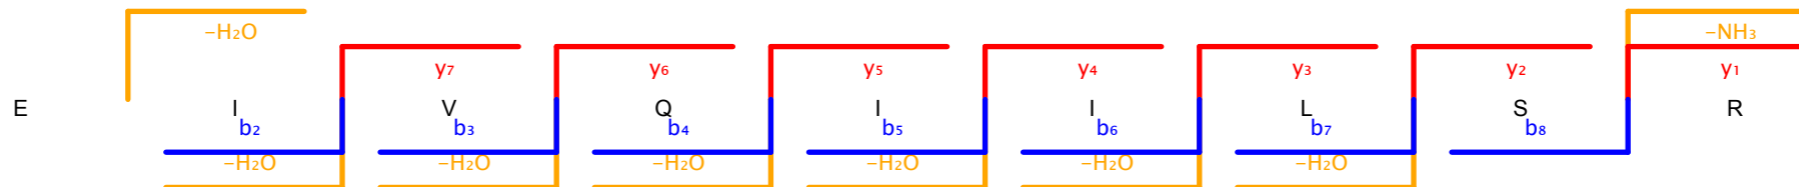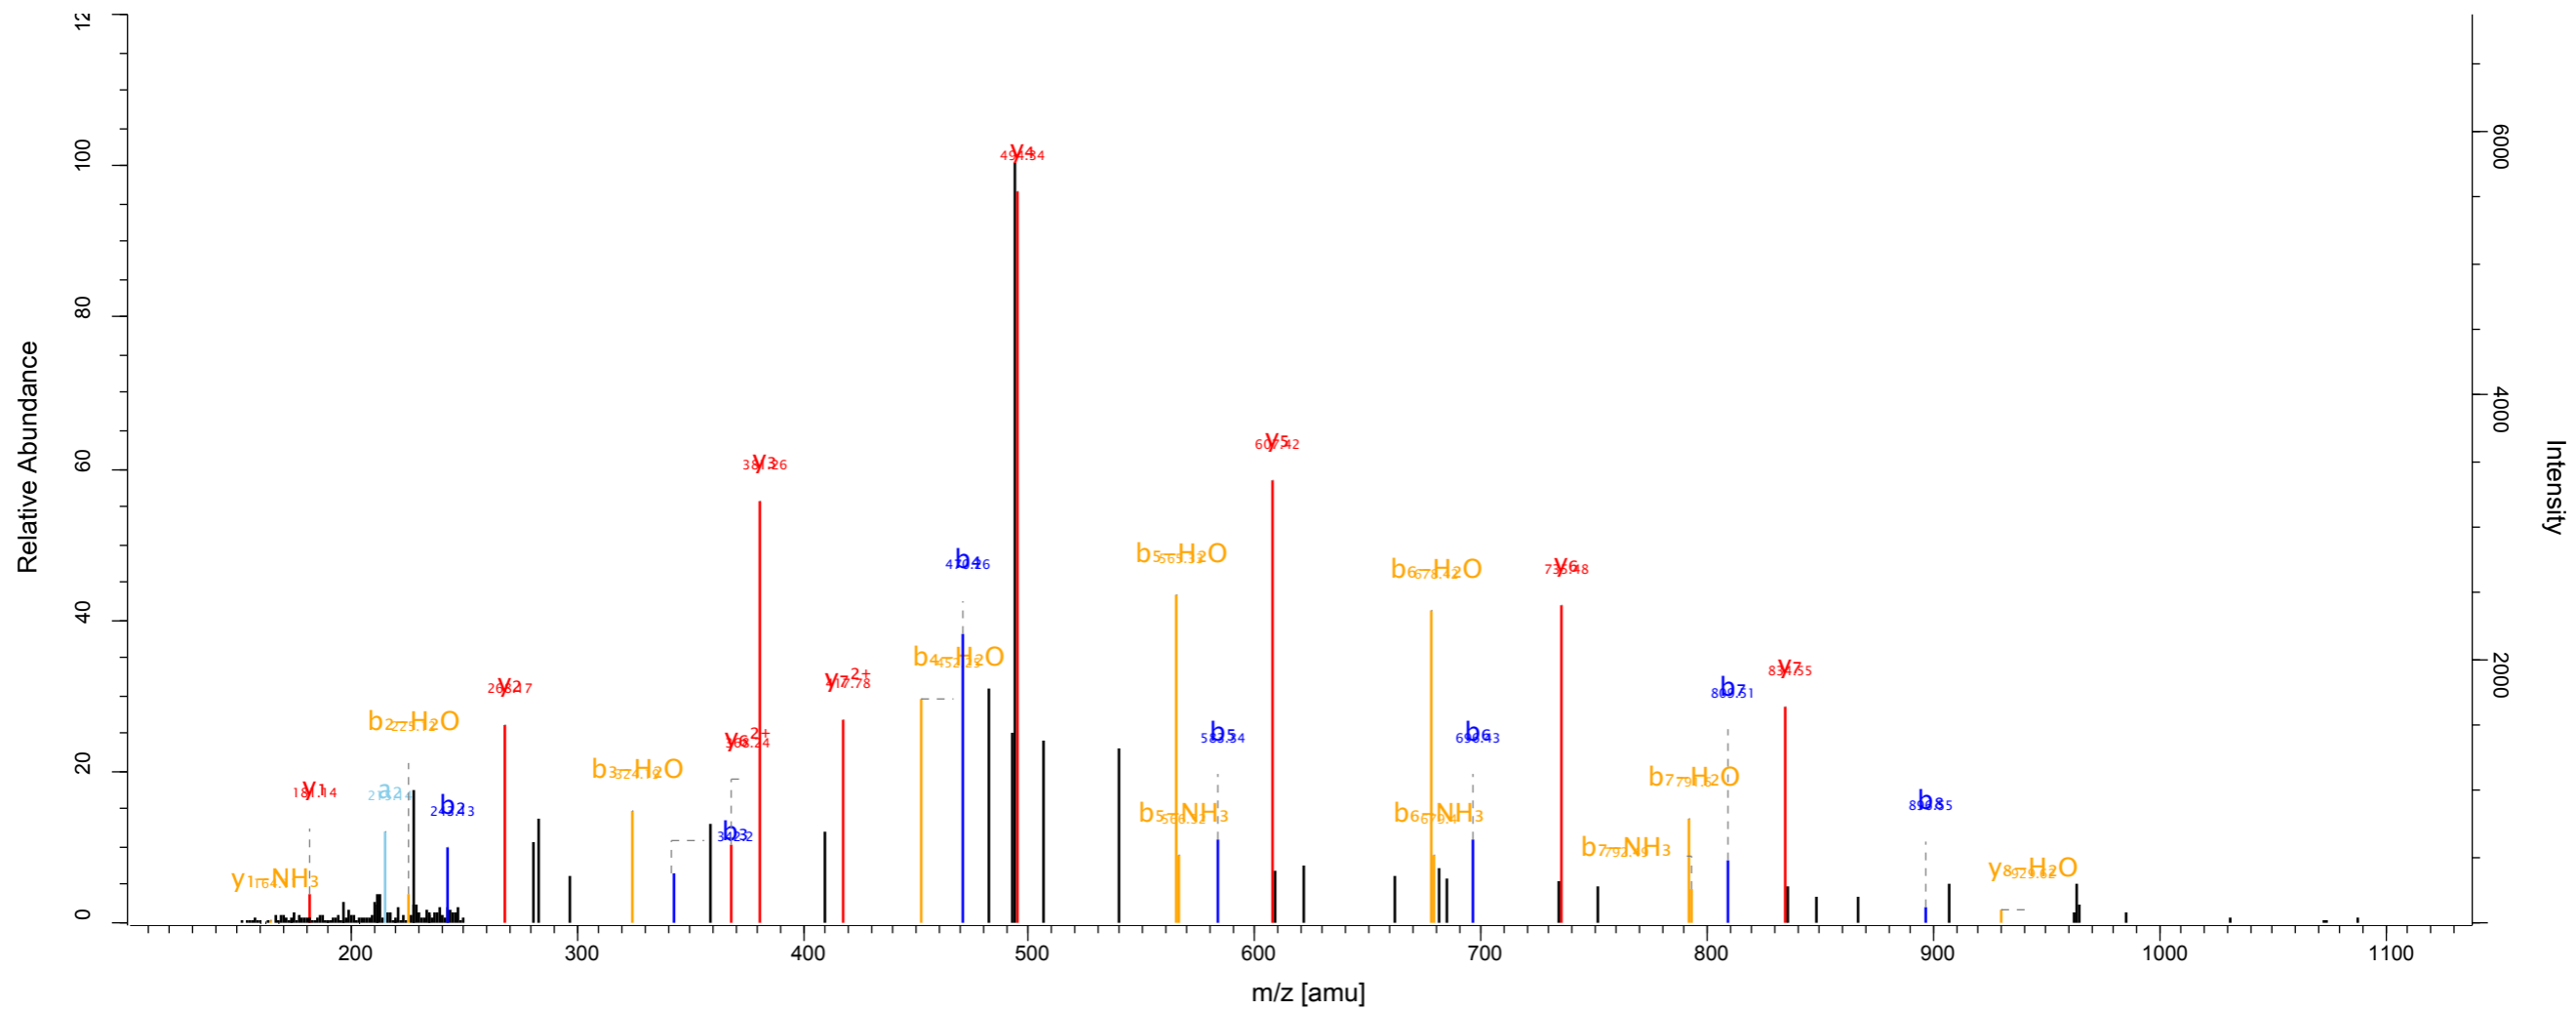

|             |           |          |                                        |
|-------------|-----------|----------|----------------------------------------|
| Scan number | 5948      | Raw file | SKaraca_LMB_TCE_Forward_20_191011_rep3 |
| Method      | ITMS; CID | Pepti... | 152.4                                  |

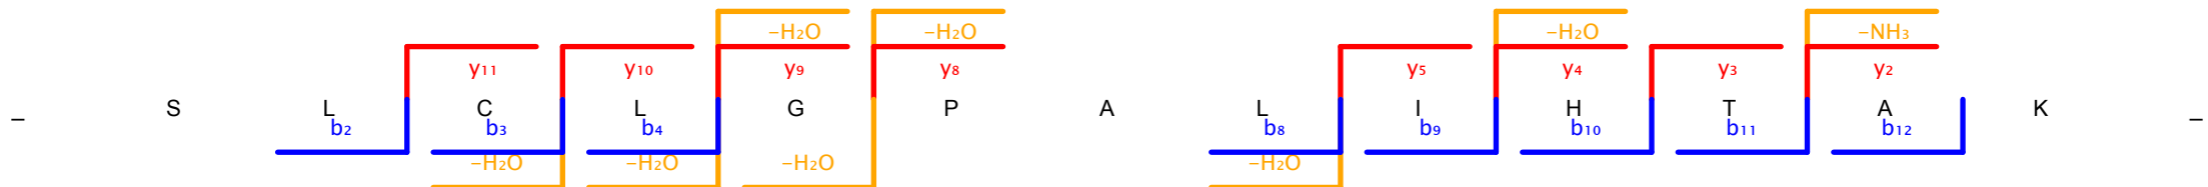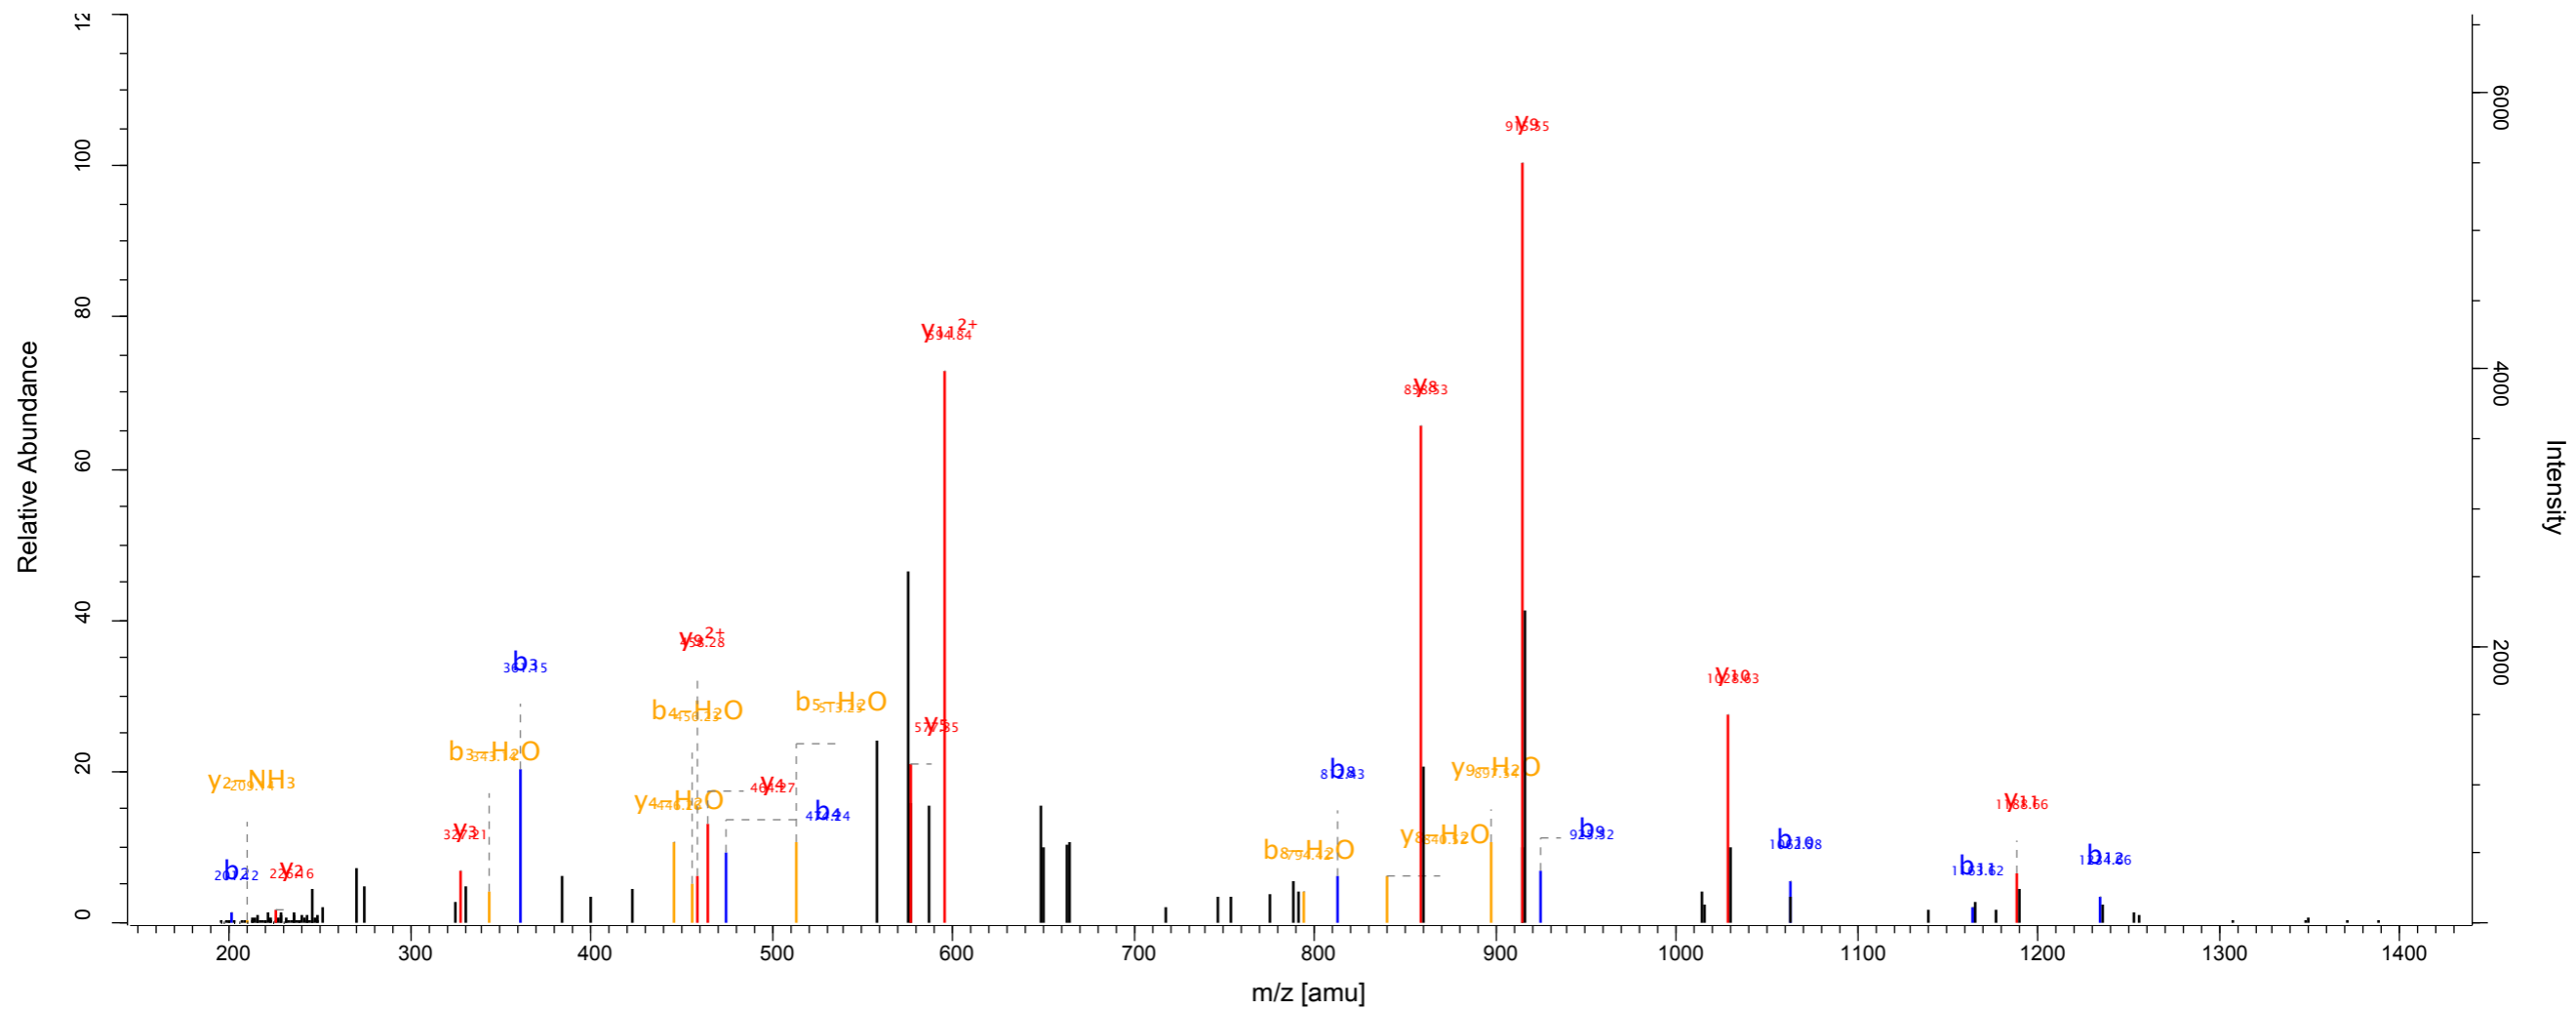

Scan number 6588 Raw file SKaraca\_LMB\_TCE\_Forward\_20\_191011\_rep3  
 Method ITMS; CID Pepti... 182.28

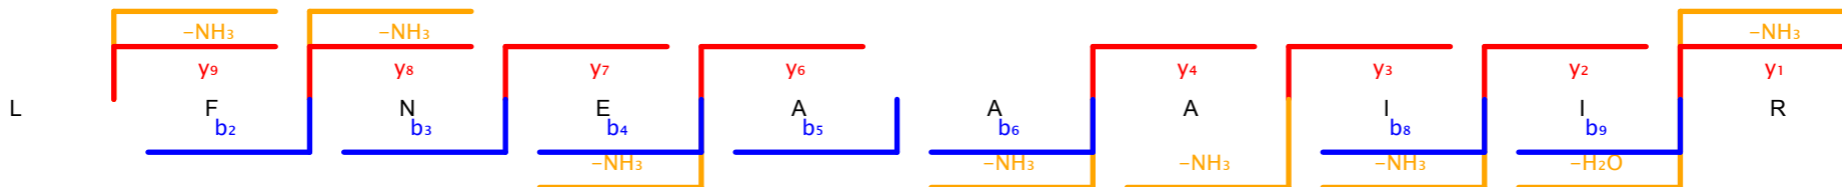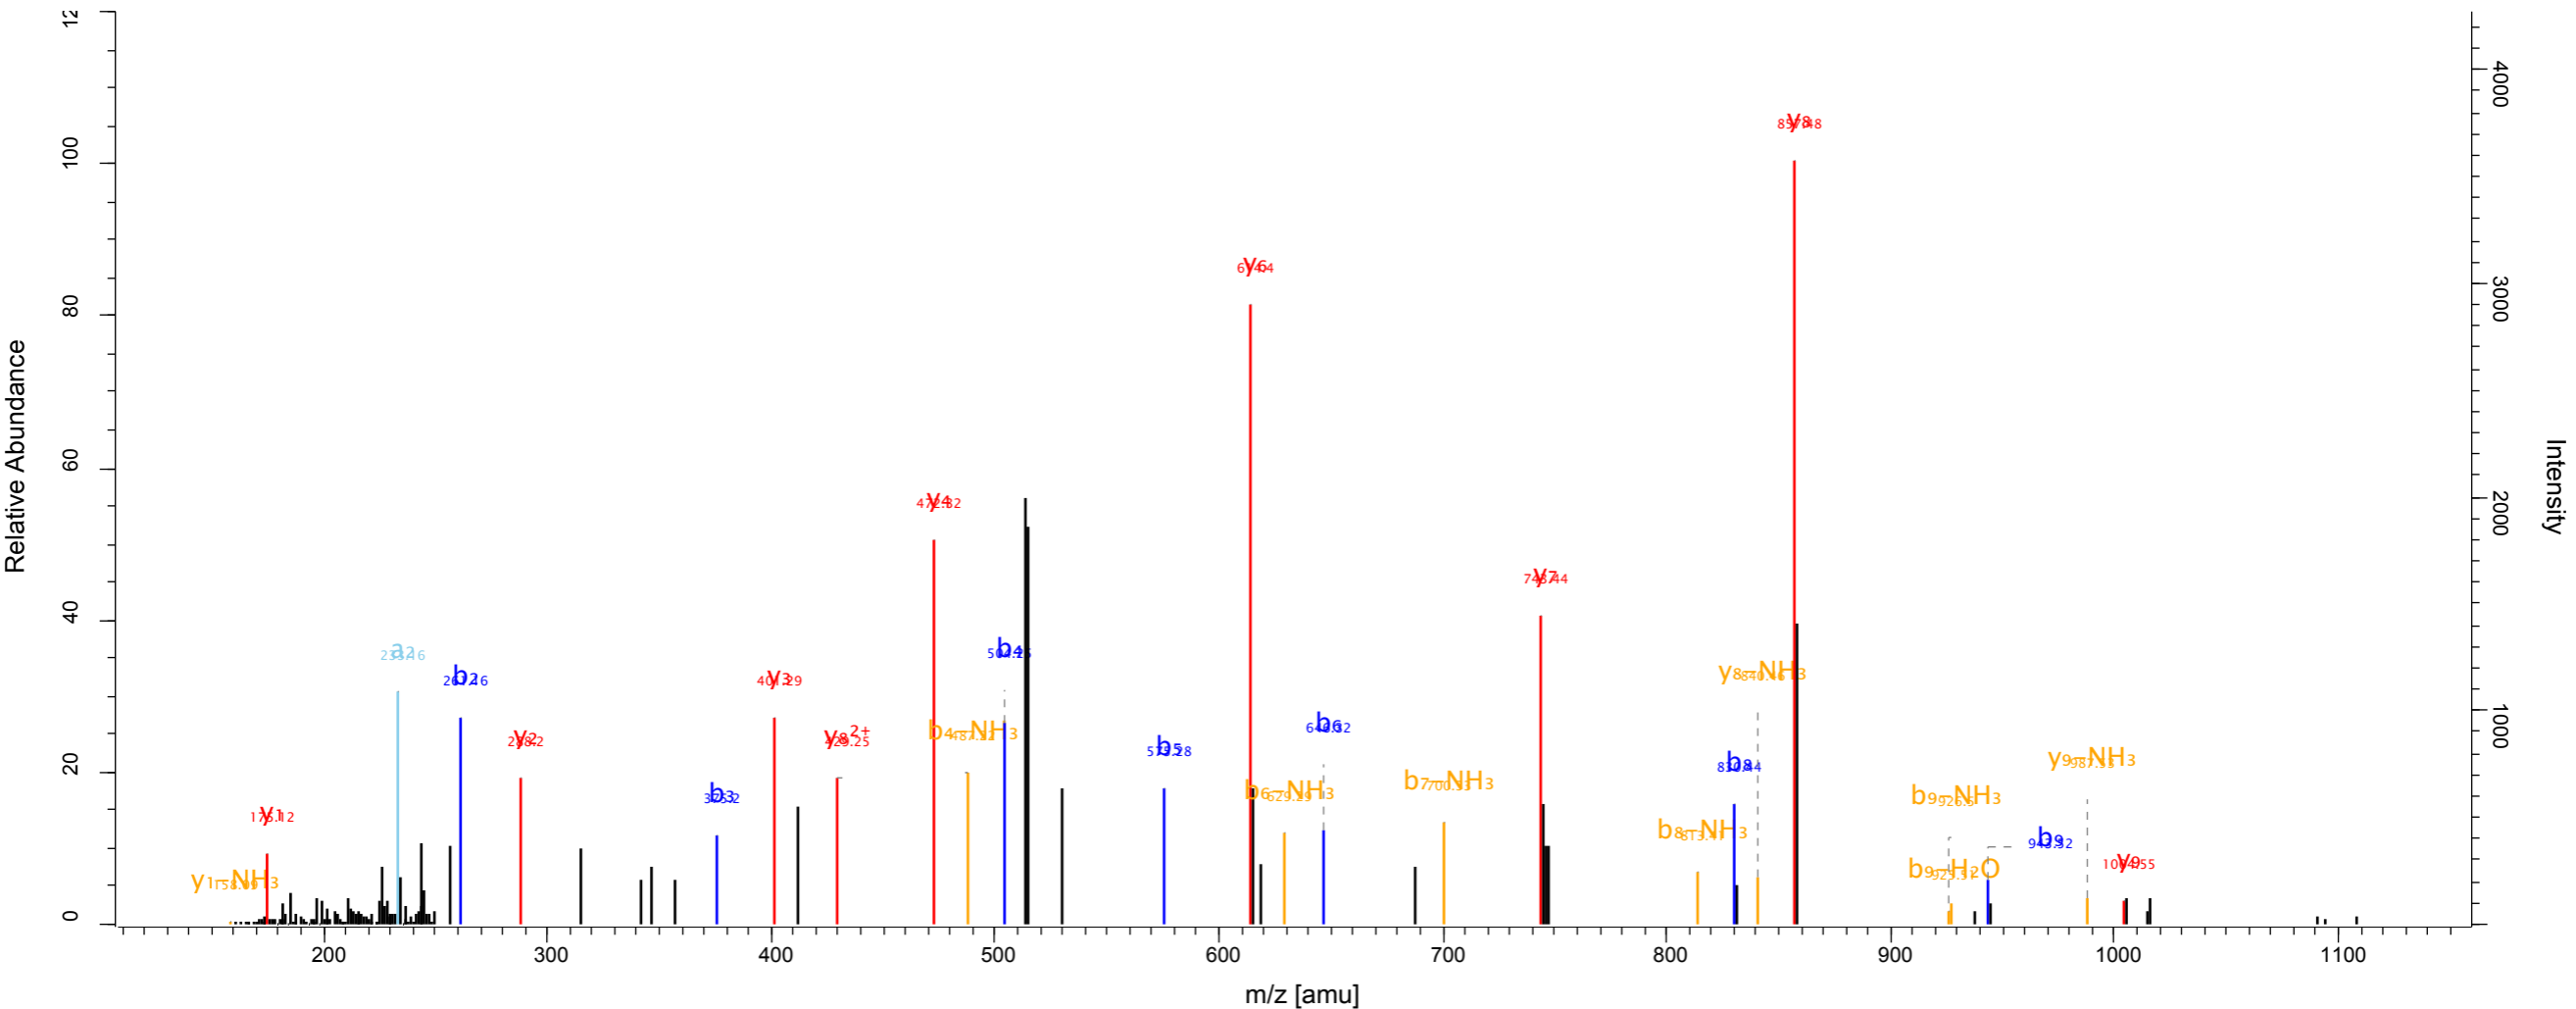

Scan number 7296 Raw file SKaraca\_LMB\_TCE\_Forward\_20\_191011\_rep3  
 Method ITMS; CID Pepti... 164.94

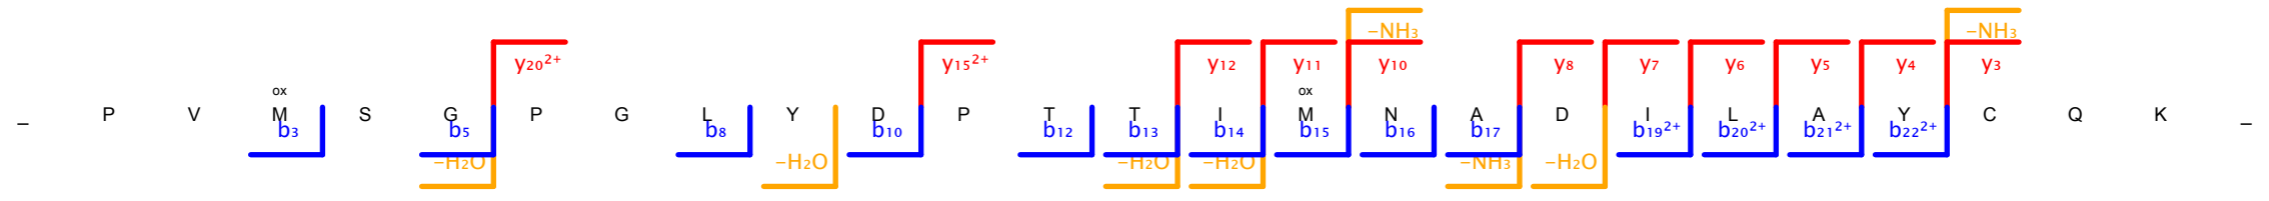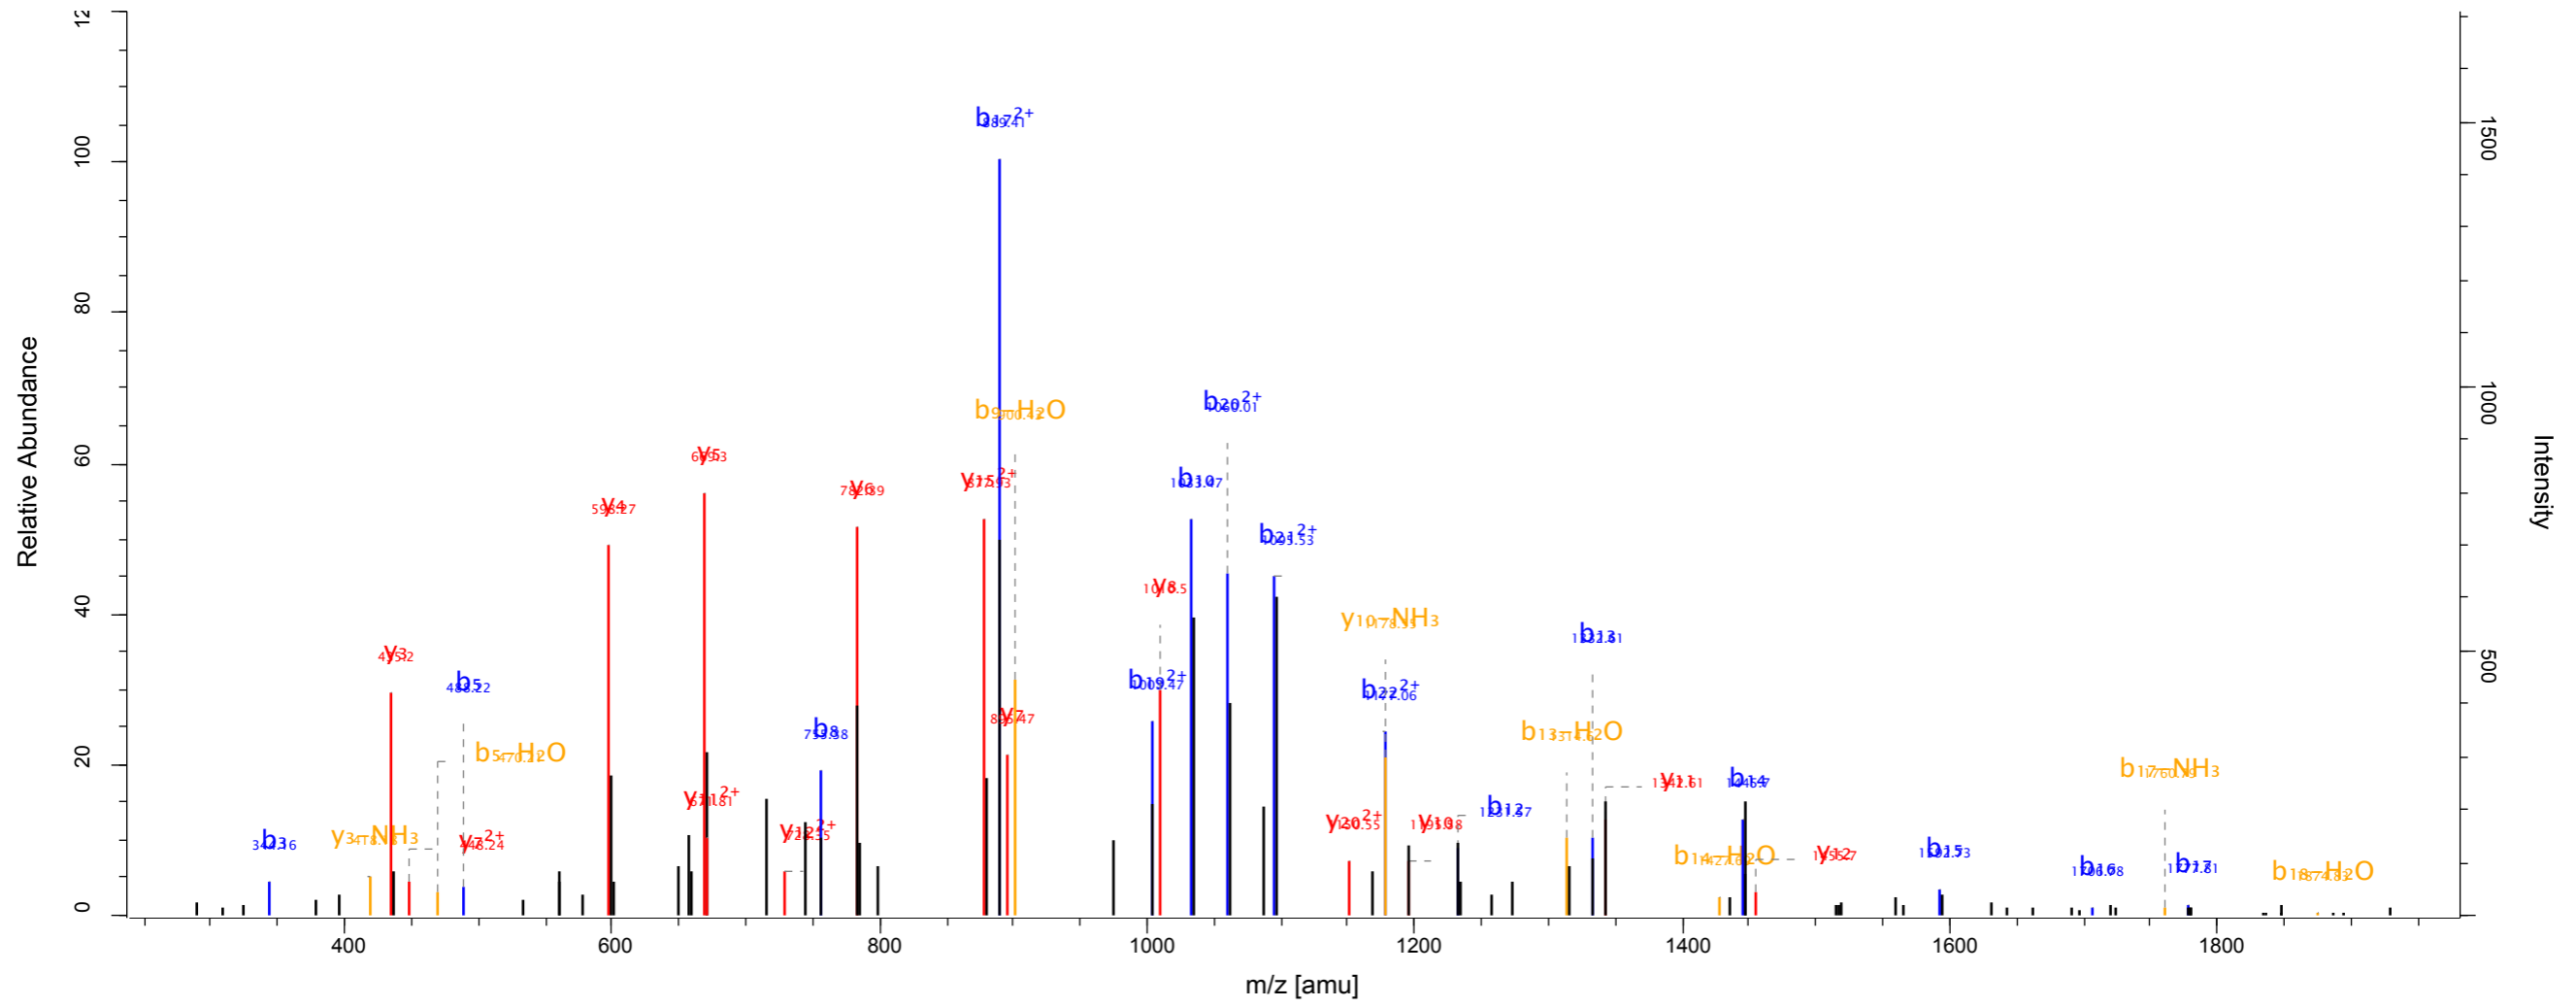

|             |           |          |                                        |
|-------------|-----------|----------|----------------------------------------|
| Scan number | 7809      | Raw file | SKaraca_LMB_TCE_Forward_20_191011_rep3 |
| Method      | ITMS; CID | Pepti... | 133.86                                 |

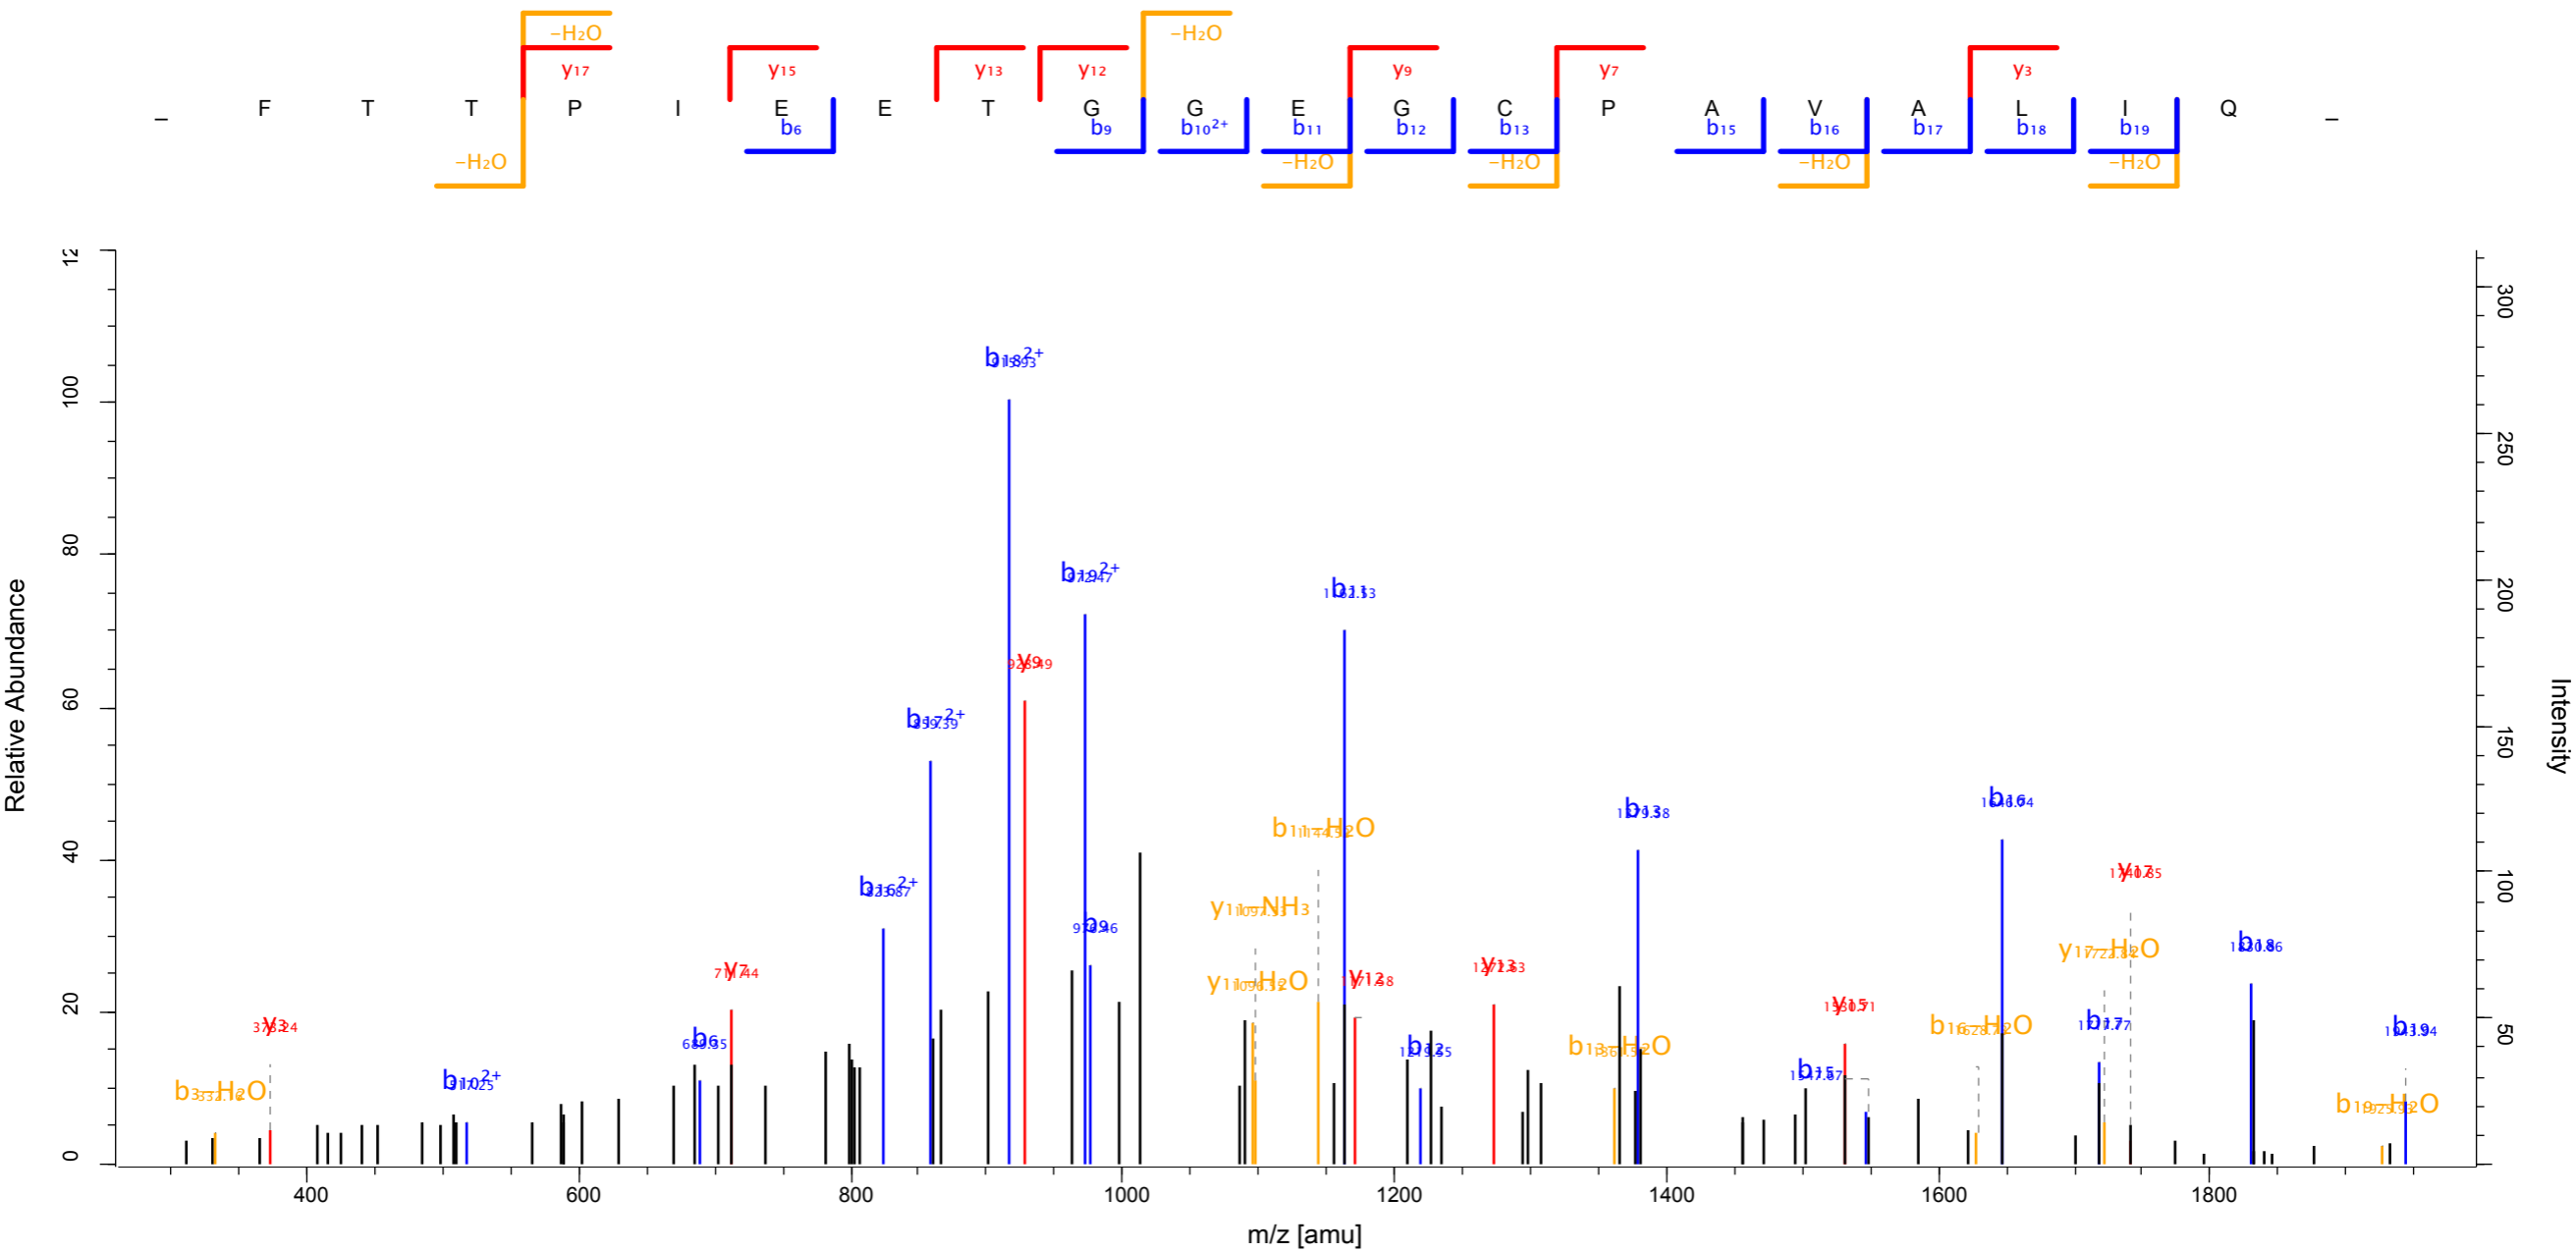



|             |           |          |                                        |
|-------------|-----------|----------|----------------------------------------|
| Scan number | 1210      | Raw file | SKaraca_LMB_TCE_Forward_21_191011_rep1 |
| Method      | ITMS; CID | Pepti... | 149.65                                 |

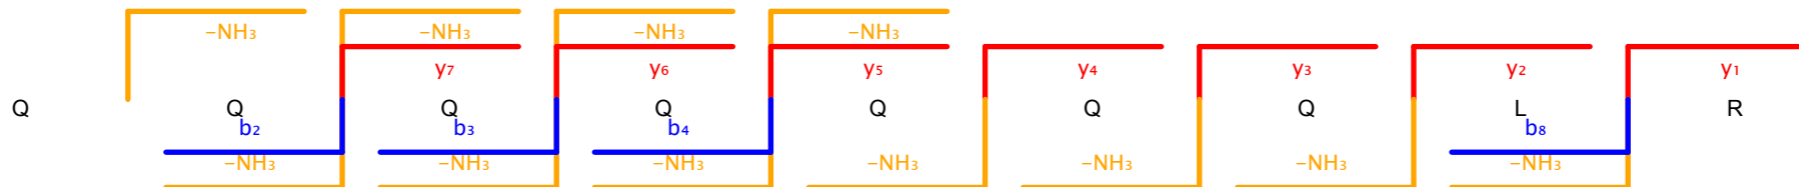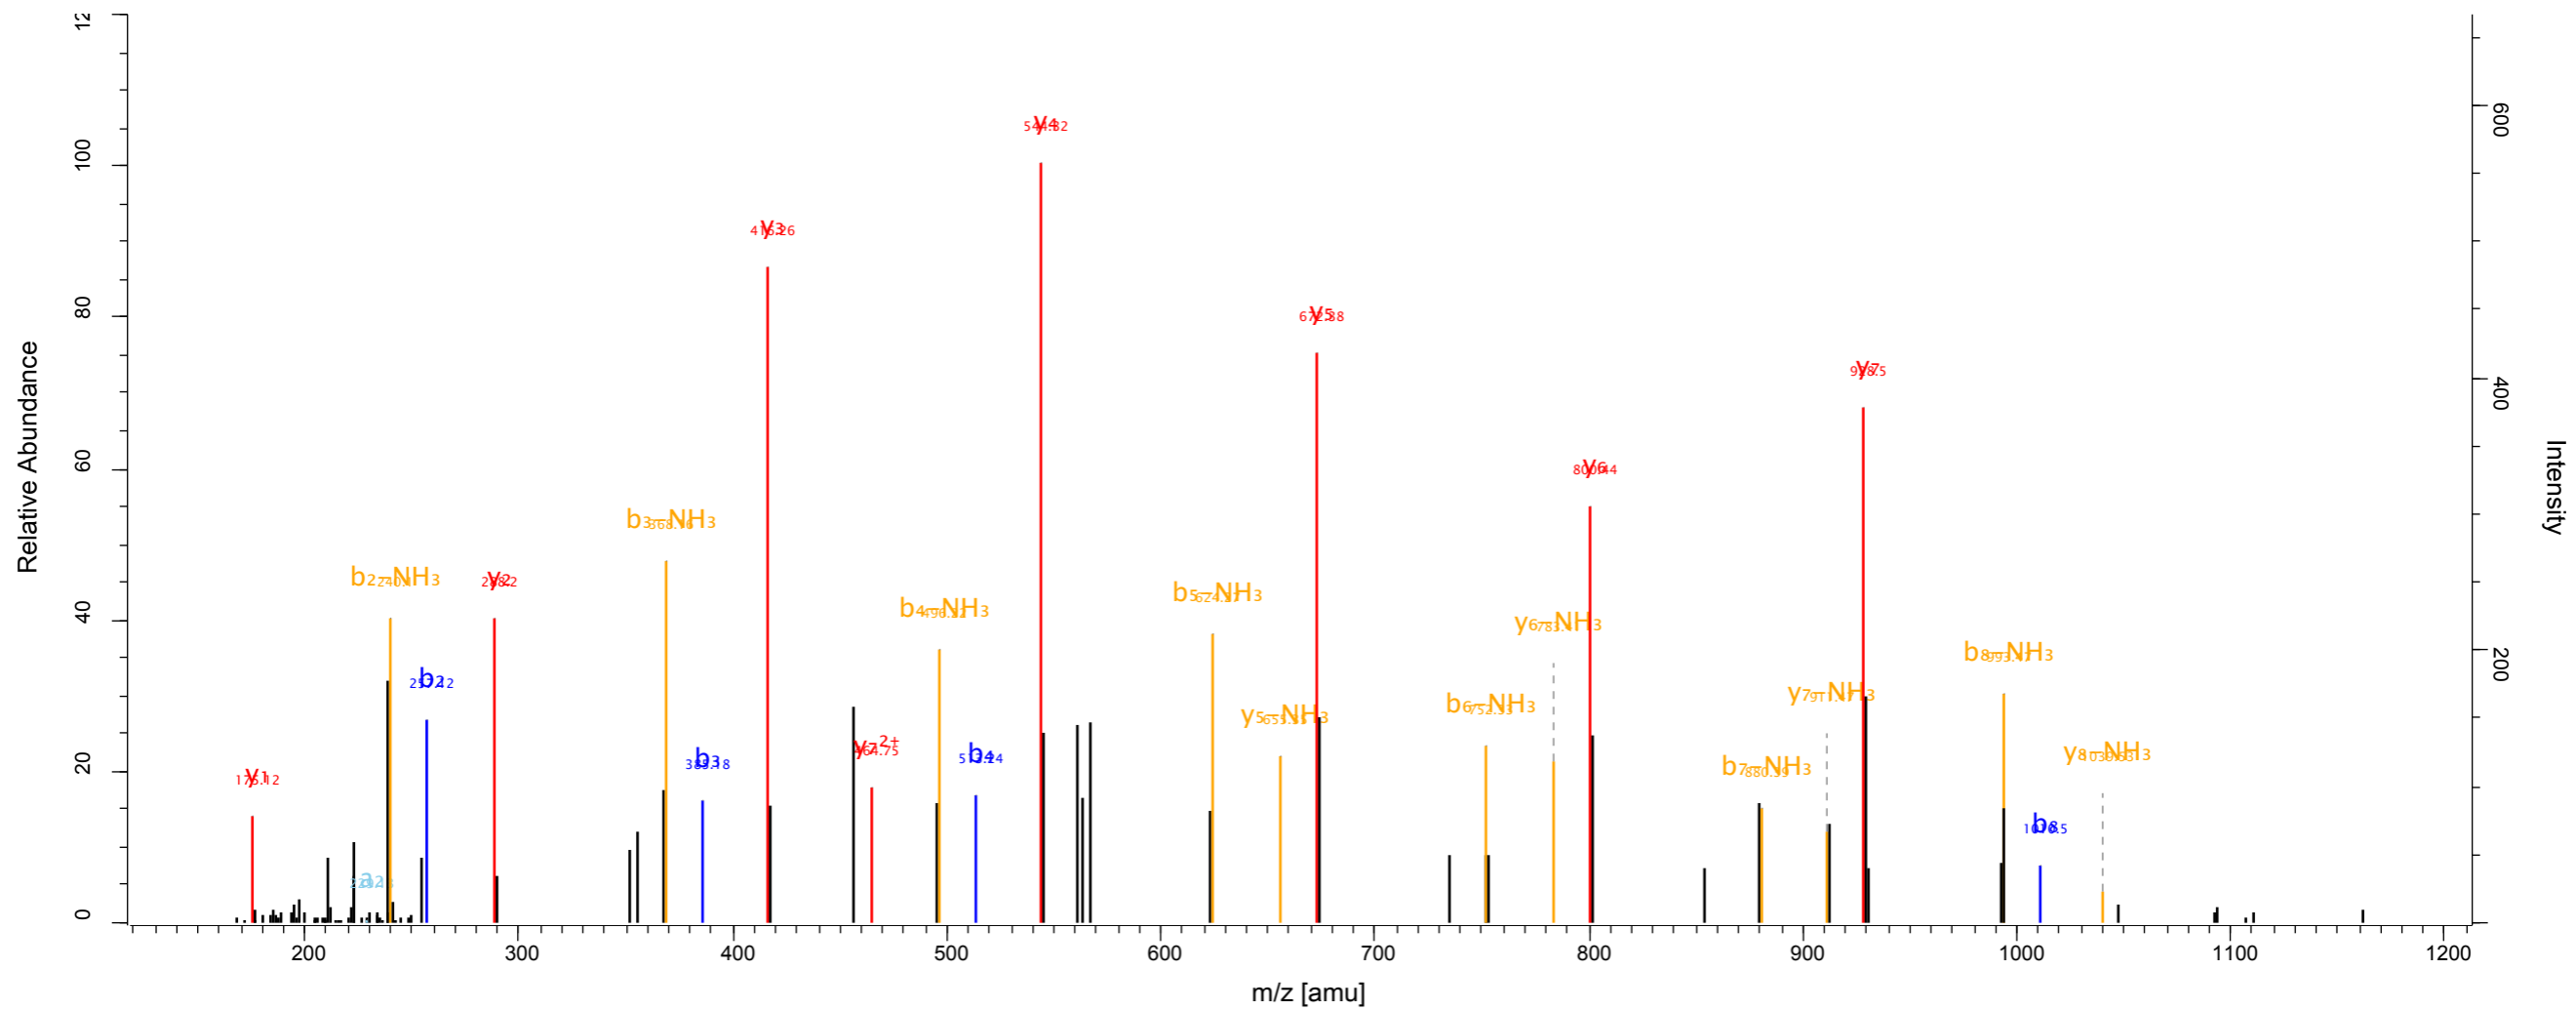

Scan number 3021 Raw file SKaraca\_LMB\_TCE\_Forward\_21\_191011\_rep1  
 Method ITMS; CID Pepti... 196.48

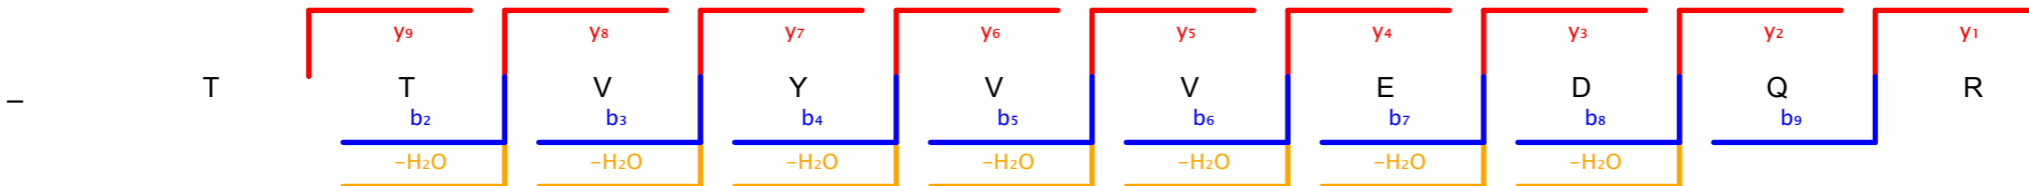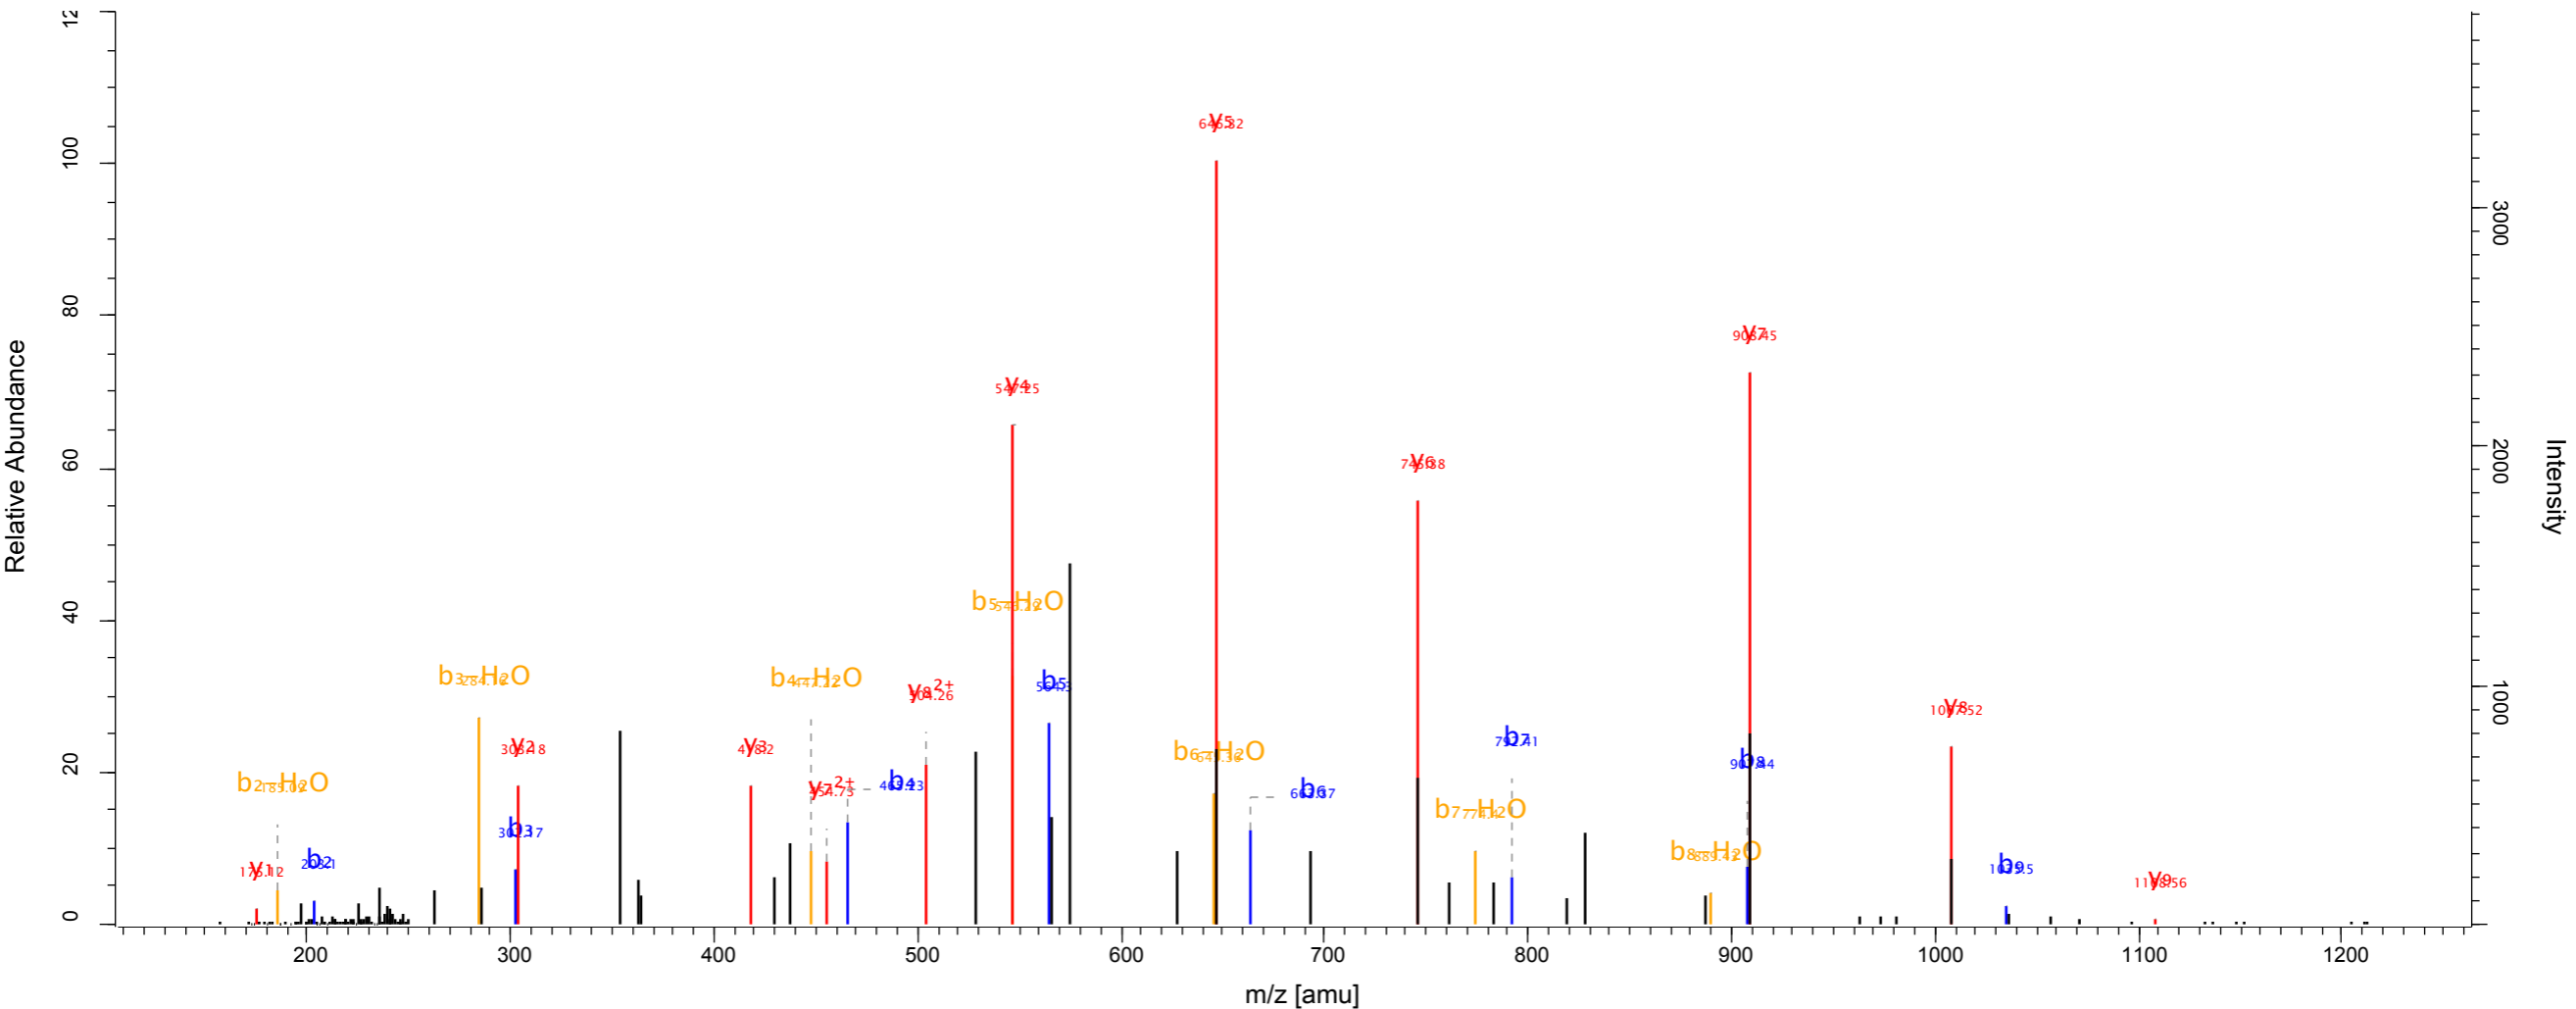

|             |           |          |                                        |
|-------------|-----------|----------|----------------------------------------|
| Scan number | 3592      | Raw file | SKaraca_LMB_TCE_Forward_21_191011_rep1 |
| Method      | ITMS; CID | Pepti... | 128.81                                 |

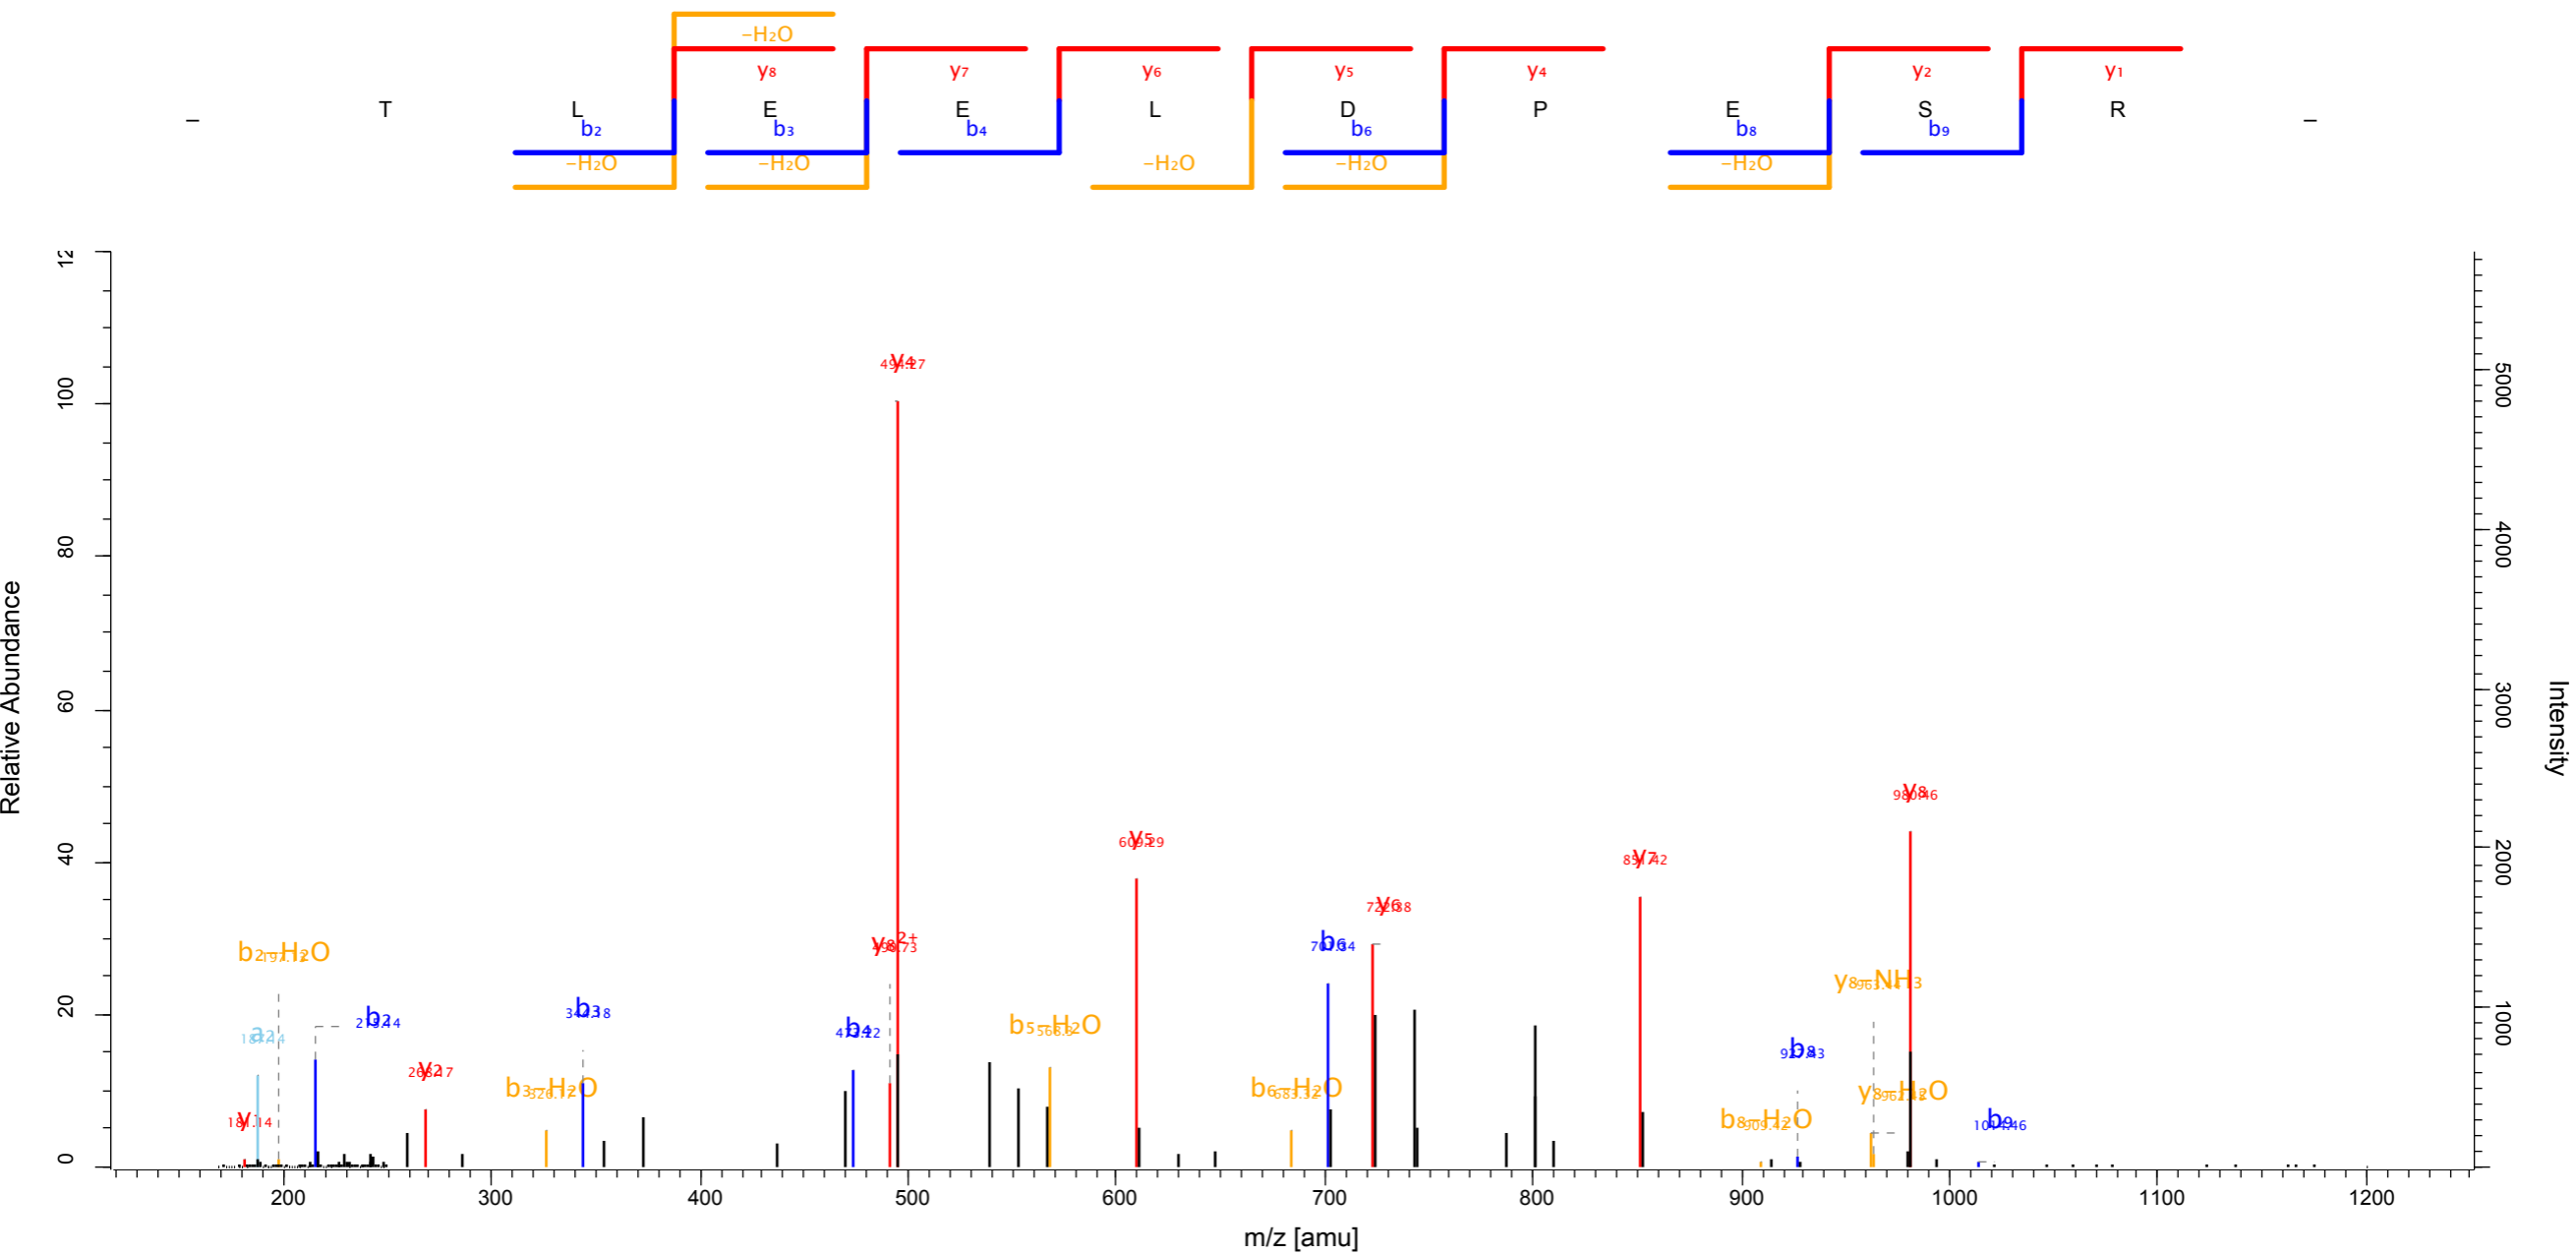

Scan number 5101 Raw file SKaraca\_LMB\_TCE\_Forward\_21\_191011\_rep1  
 Method ITMS; CID Pepti... 246.03

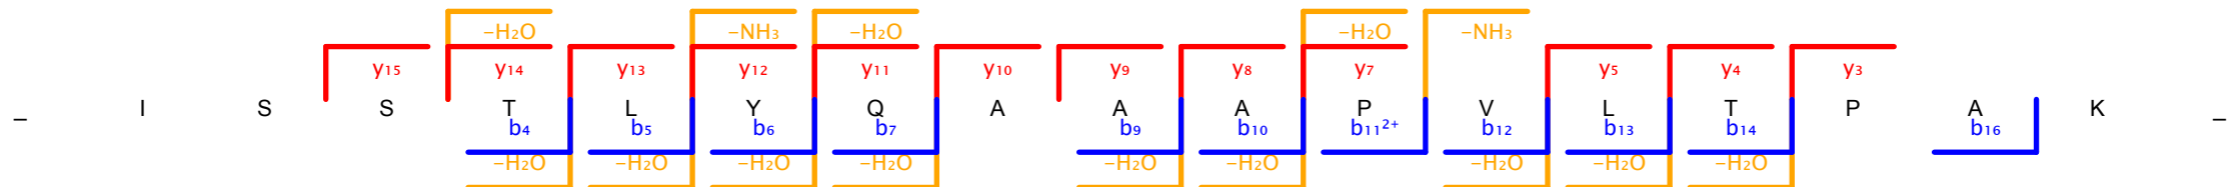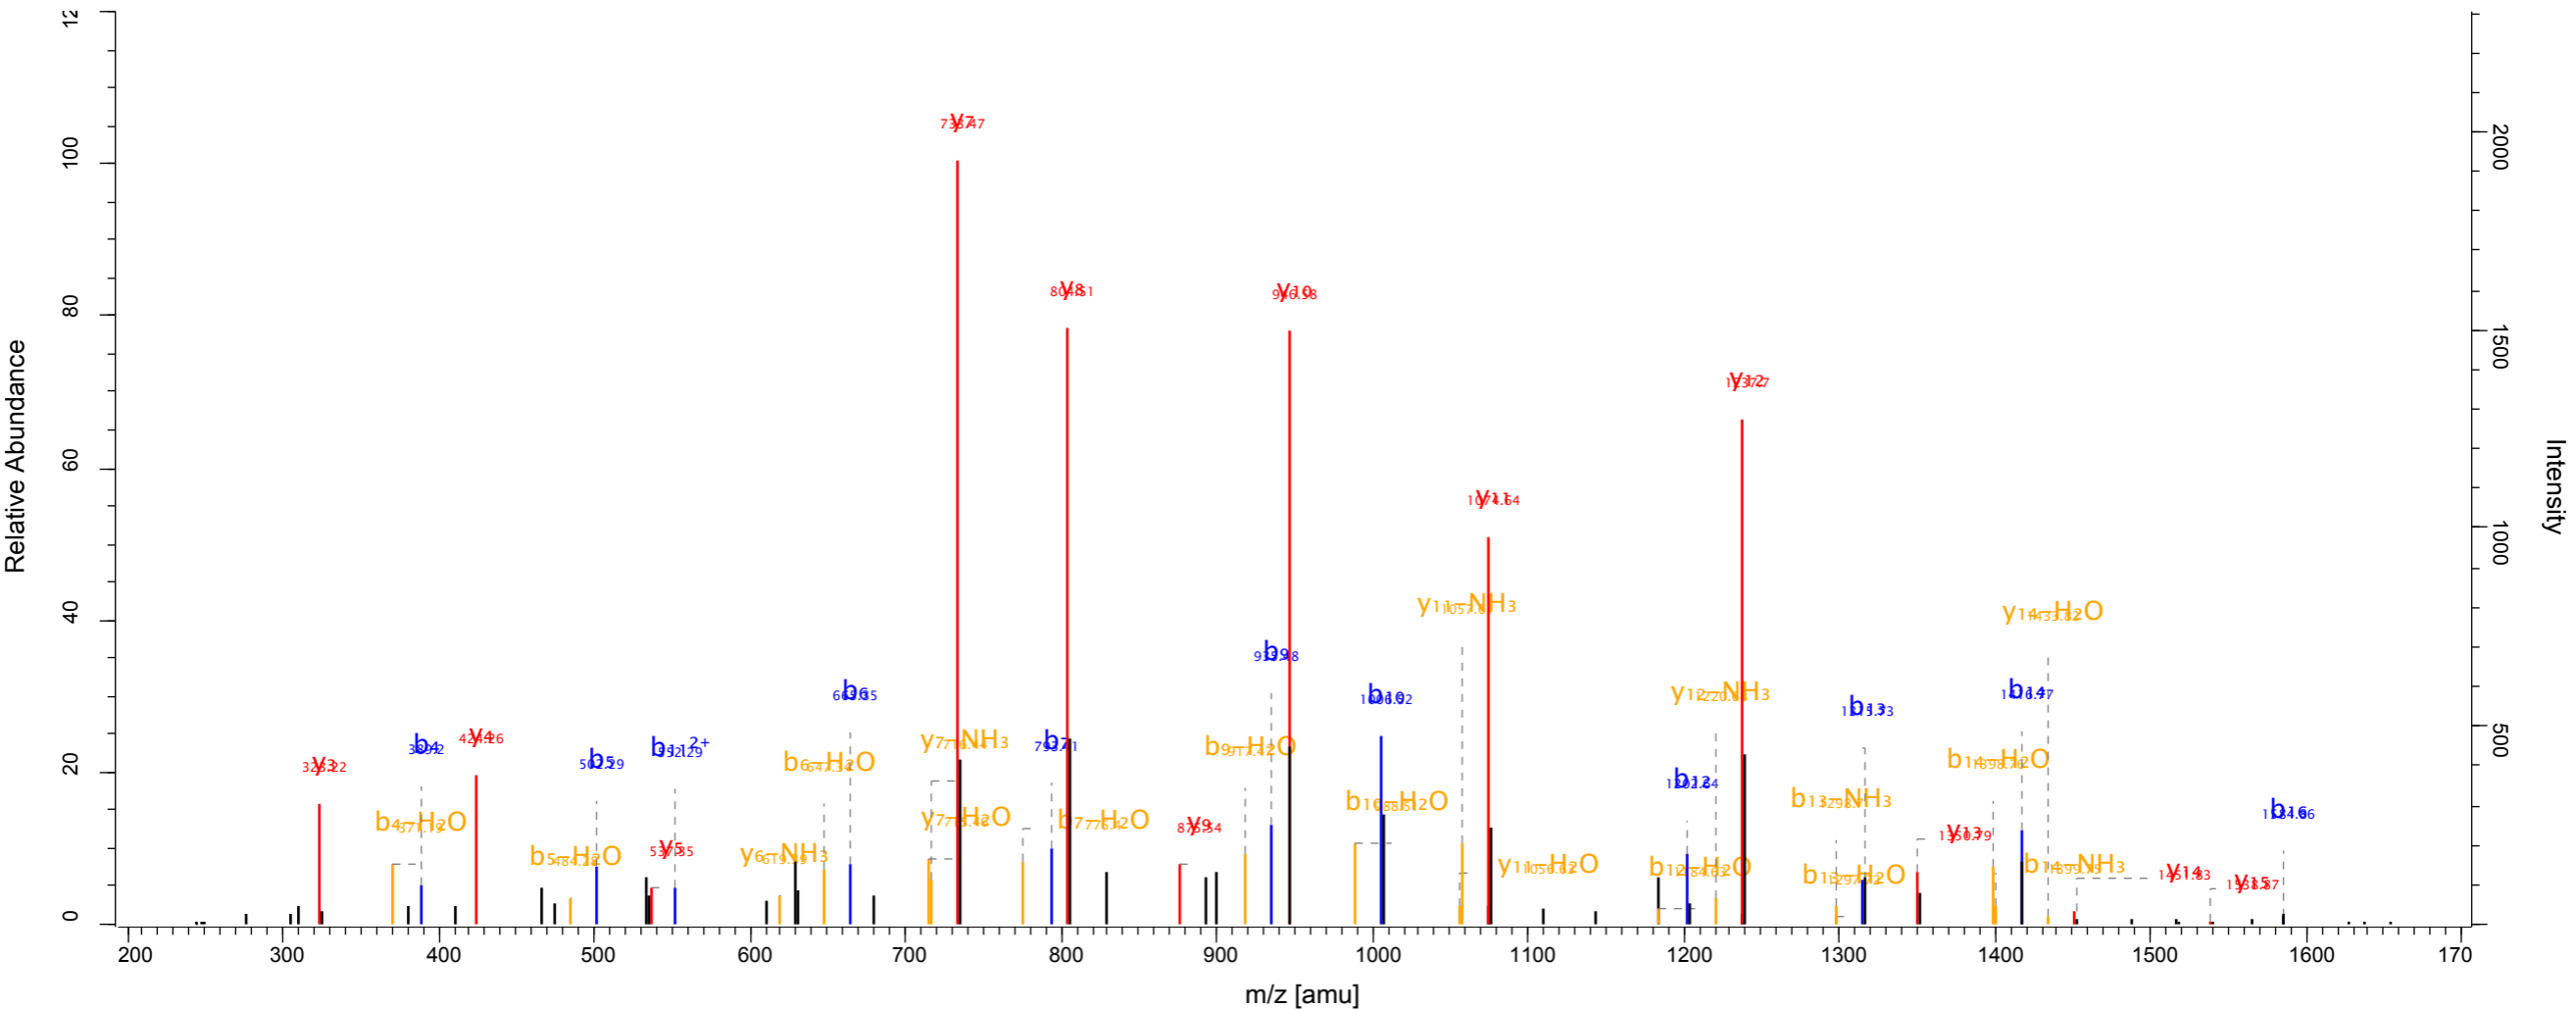

Scan number 5404 Raw file SKaraca\_LMB\_TCE\_Forward\_21\_191011\_rep1  
 Method ITMS; CID Pepti... 244.32

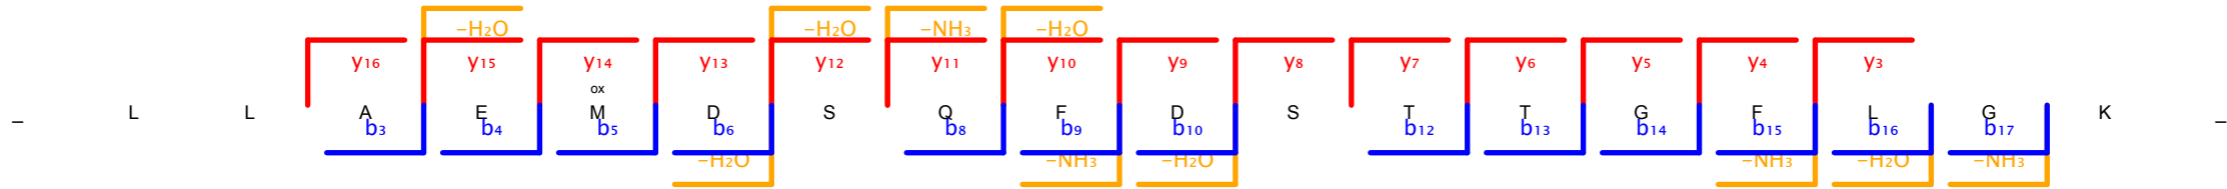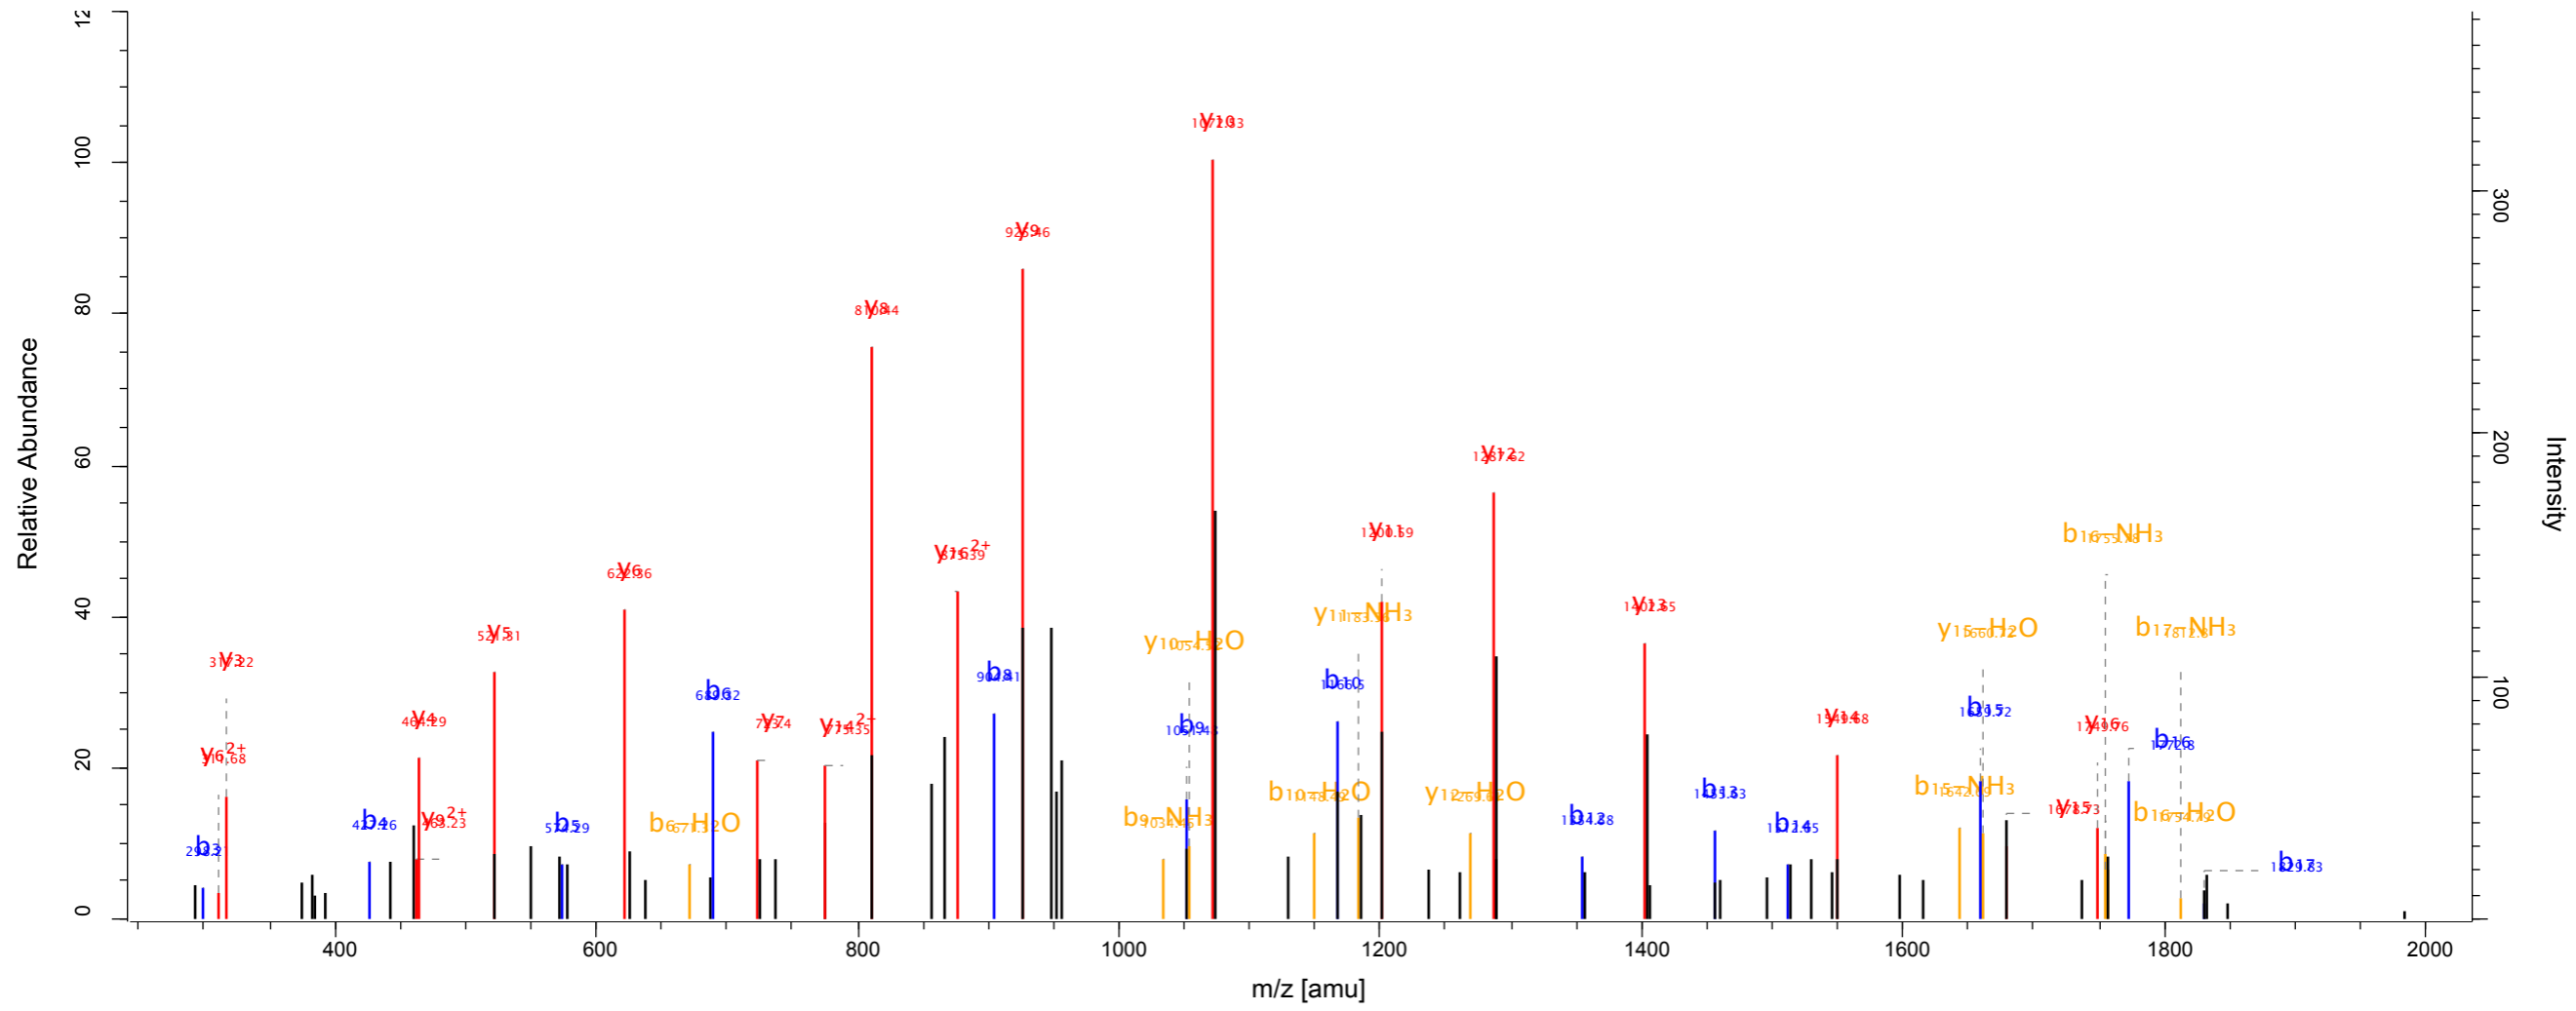

Scan number 2766 Raw file SKaraca\_LMB\_TCE\_Forward\_21\_191011\_rep2  
 Method ITMS; CID Pepti... 129.89

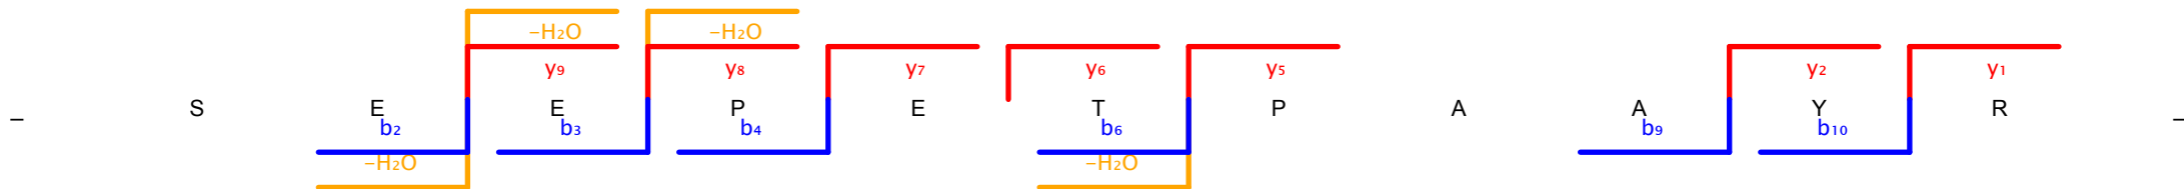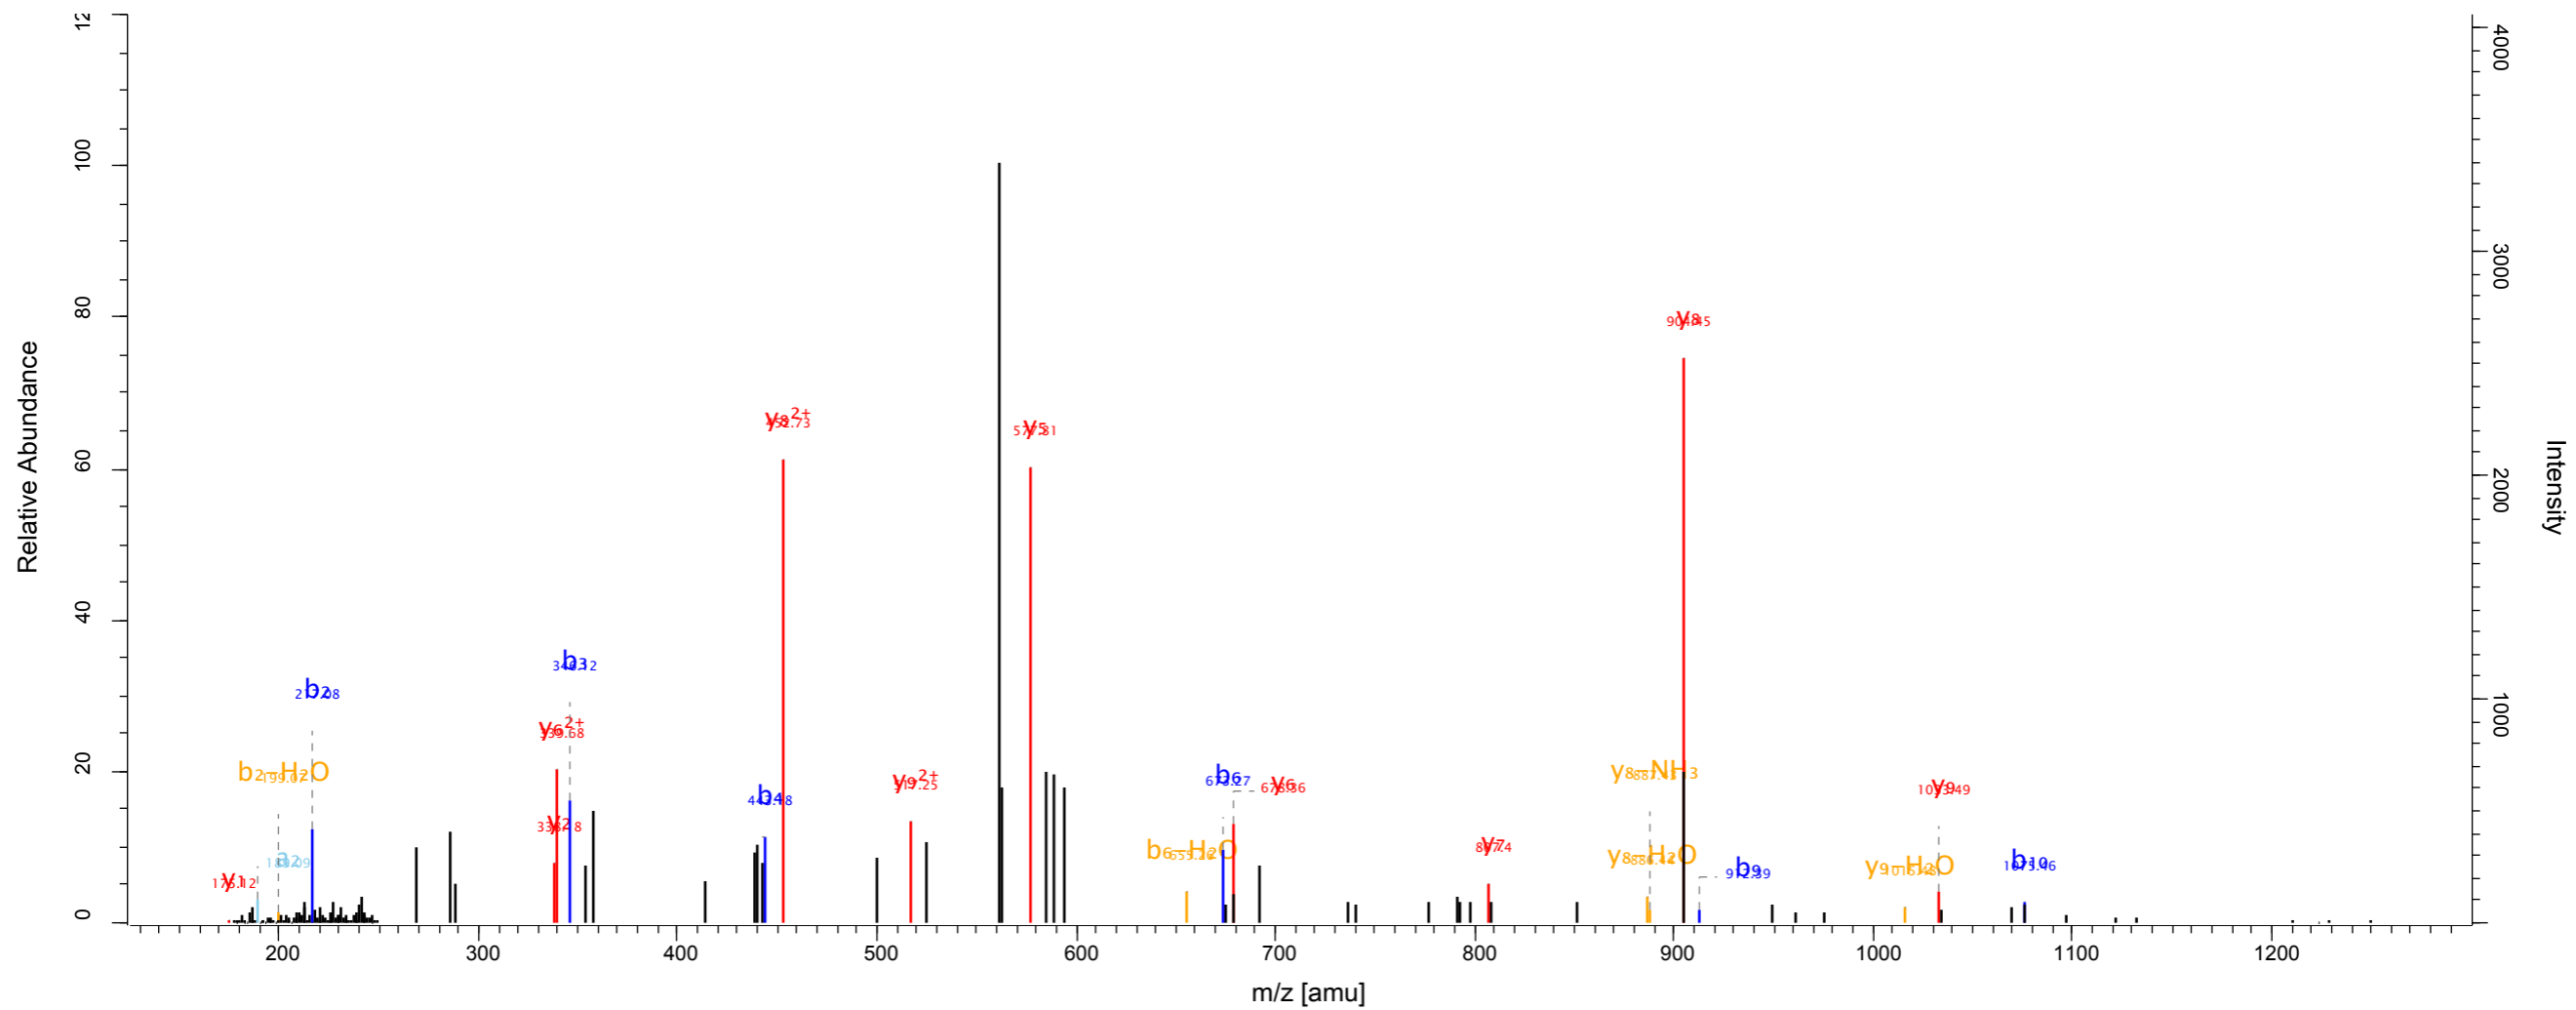

Scan number 4237 Raw file SKaraca\_LMB\_TCE\_Forward\_21\_191011\_rep2  
 Method ITMS; CID Pepti... 237.87

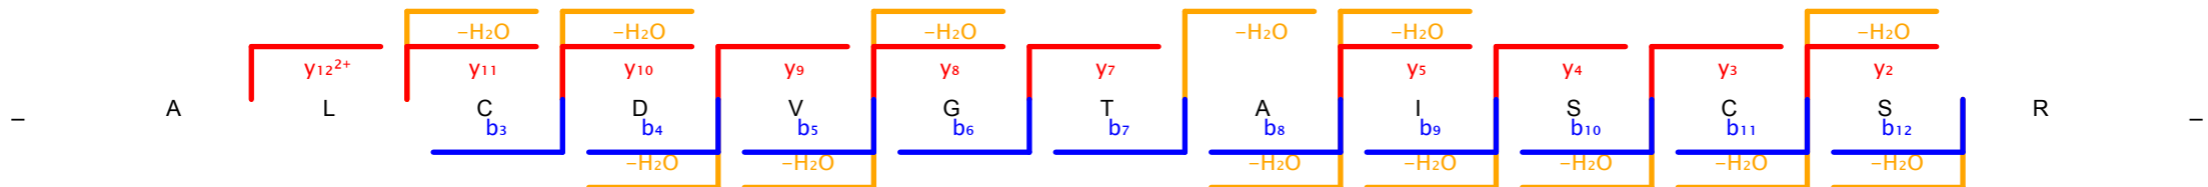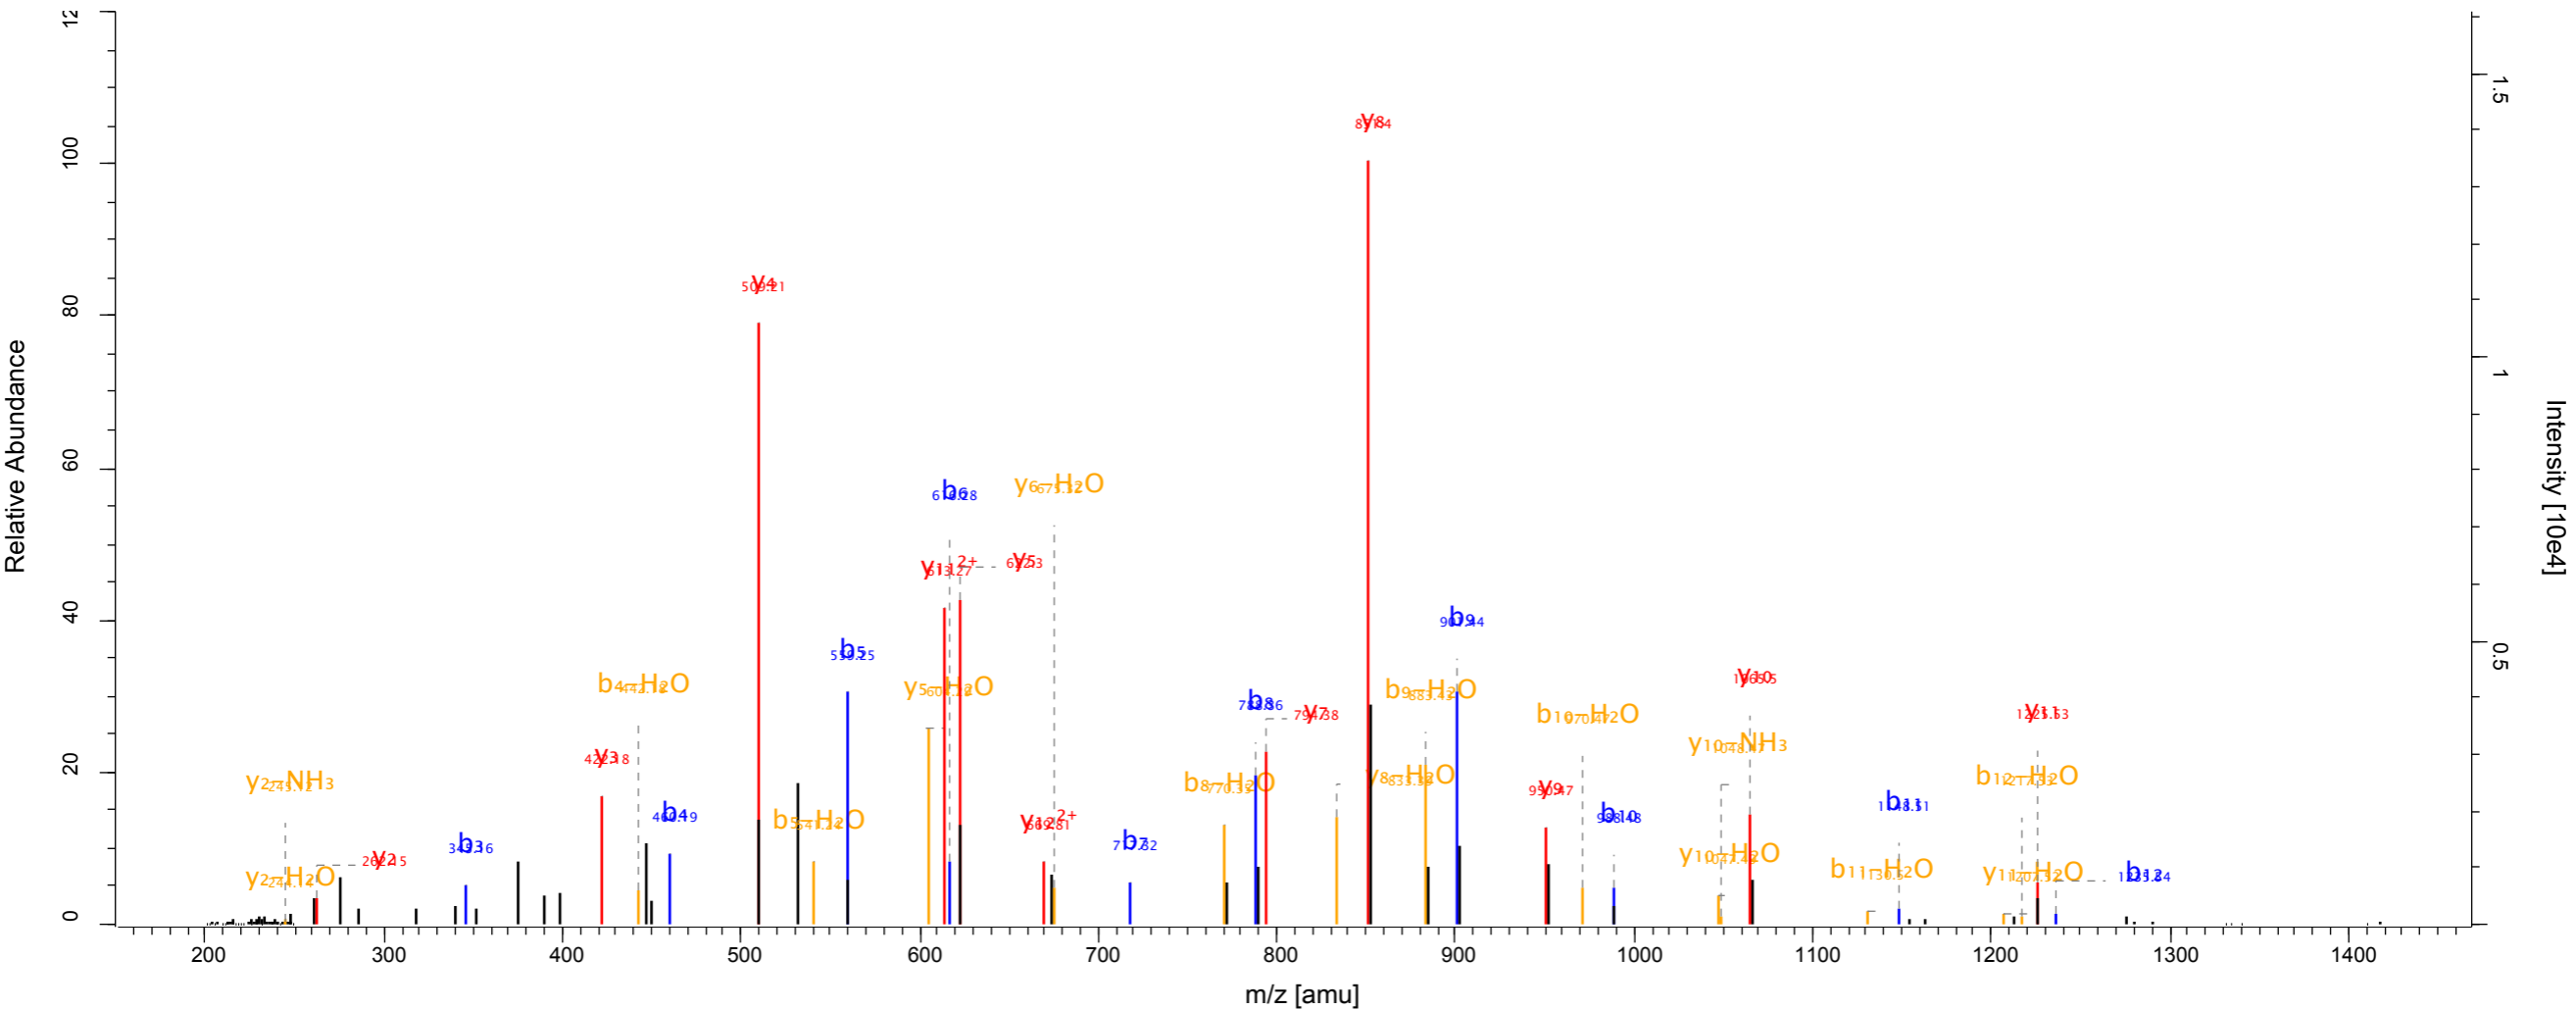

|             |           |          |                                        |
|-------------|-----------|----------|----------------------------------------|
| Scan number | 5692      | Raw file | SKaraca_LMB_TCE_Forward_21_191011_rep2 |
| Method      | ITMS; CID | Pepti... | 124.23                                 |

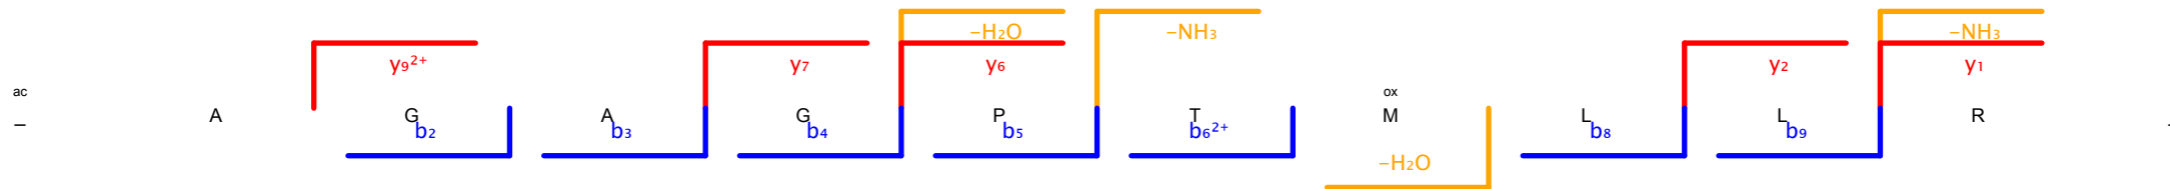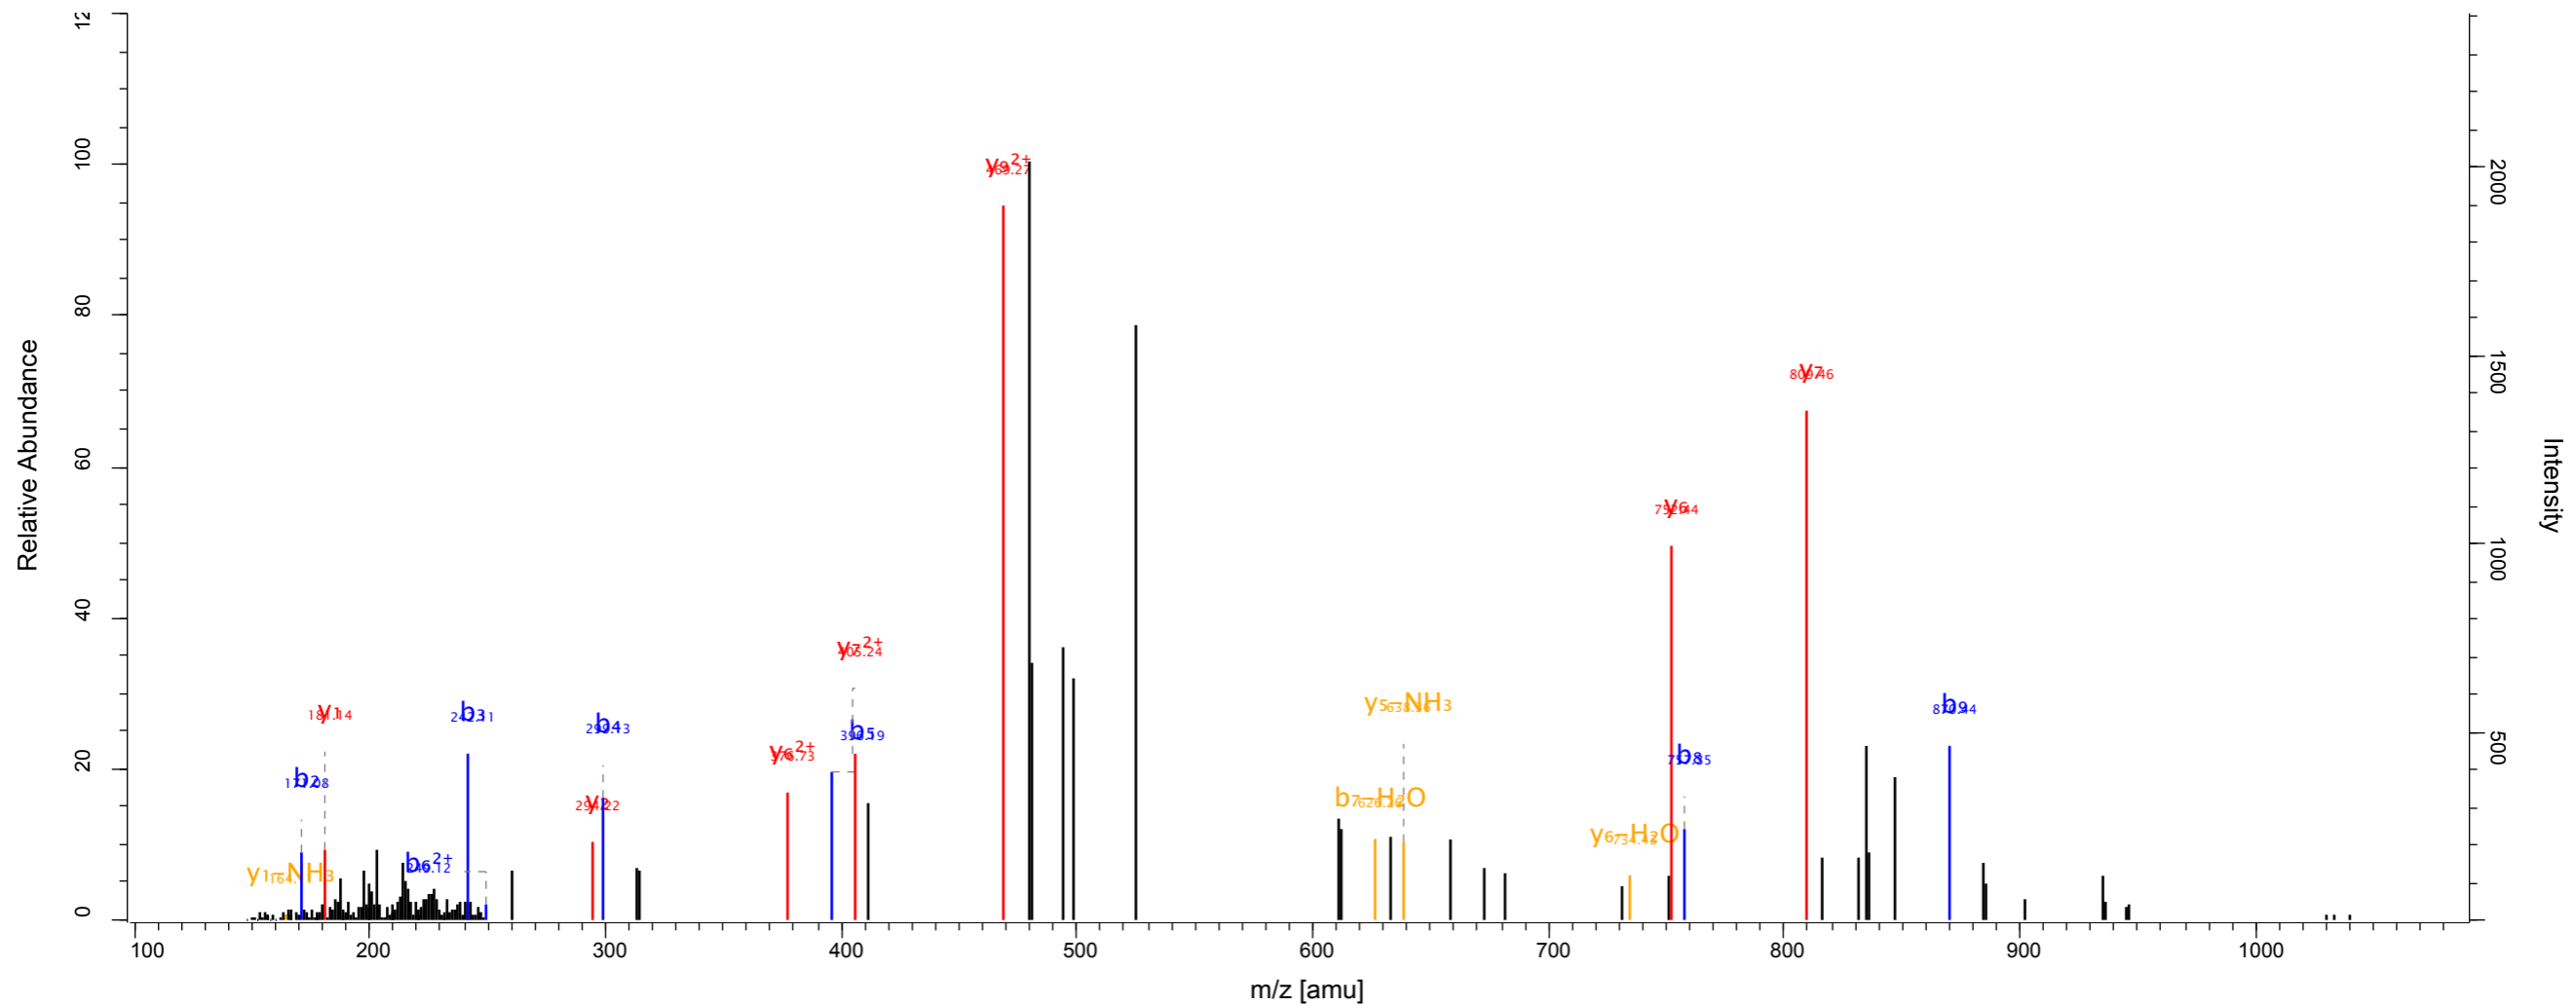



Scan number 1152 Raw file SKaraca\_LMB\_TCE\_Forward\_21\_191011\_rep3  
 Method ITMS; CID Pepti... 142.43

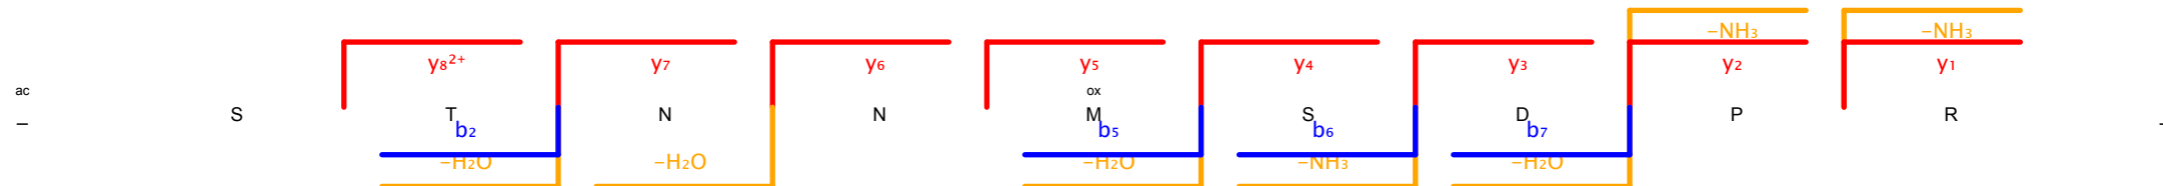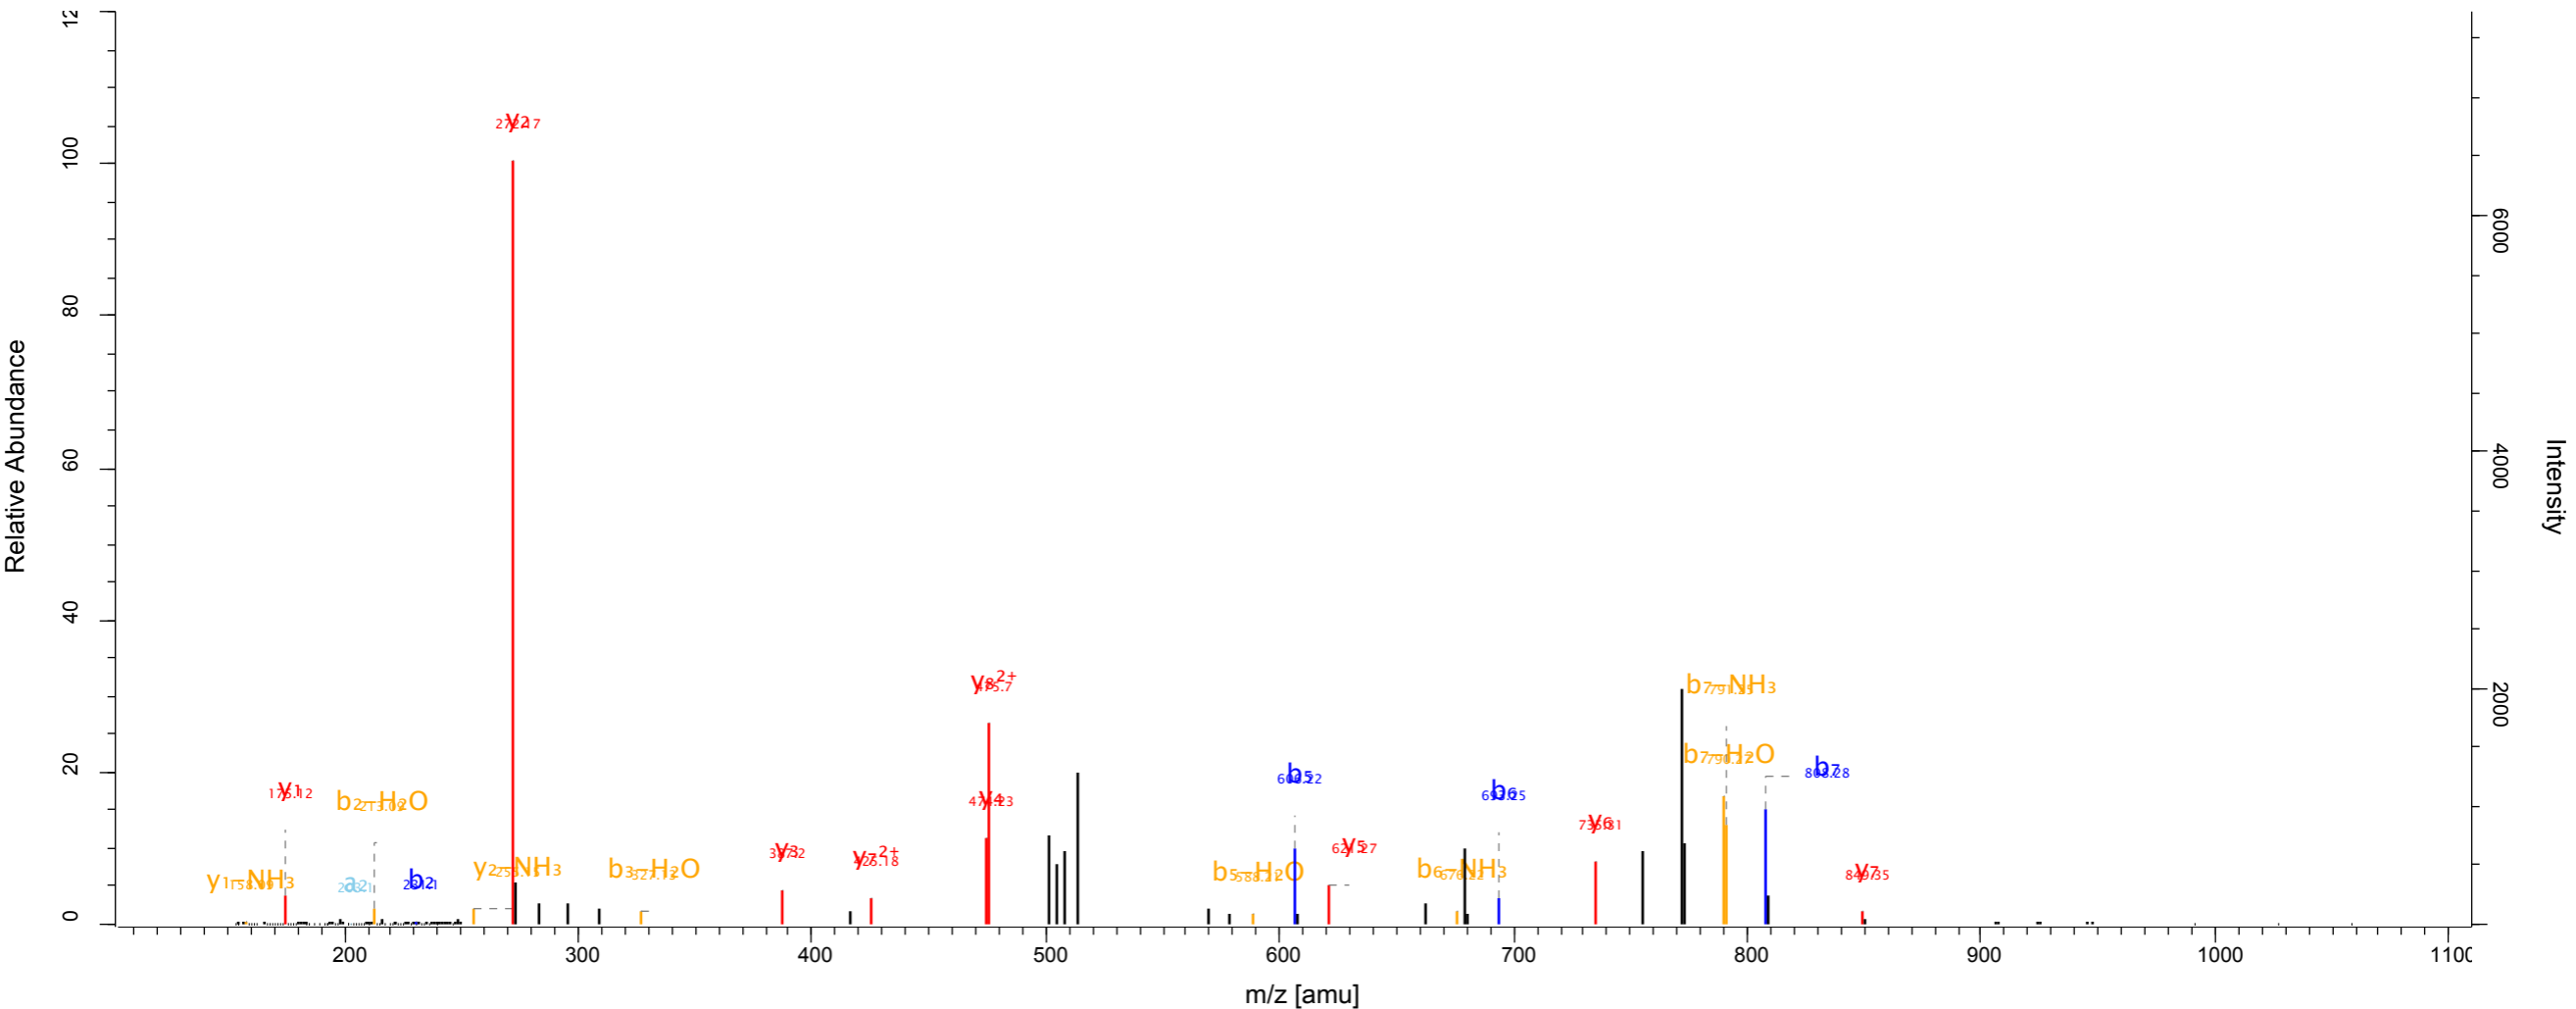

Scan number 1302 Raw file SKaraca\_LMB\_TCE\_Forward\_21\_191011\_rep3  
 Method ITMS; CID Pepti... 171.73

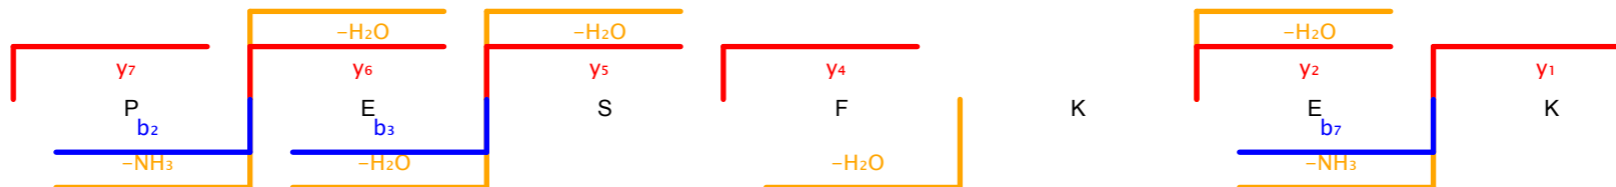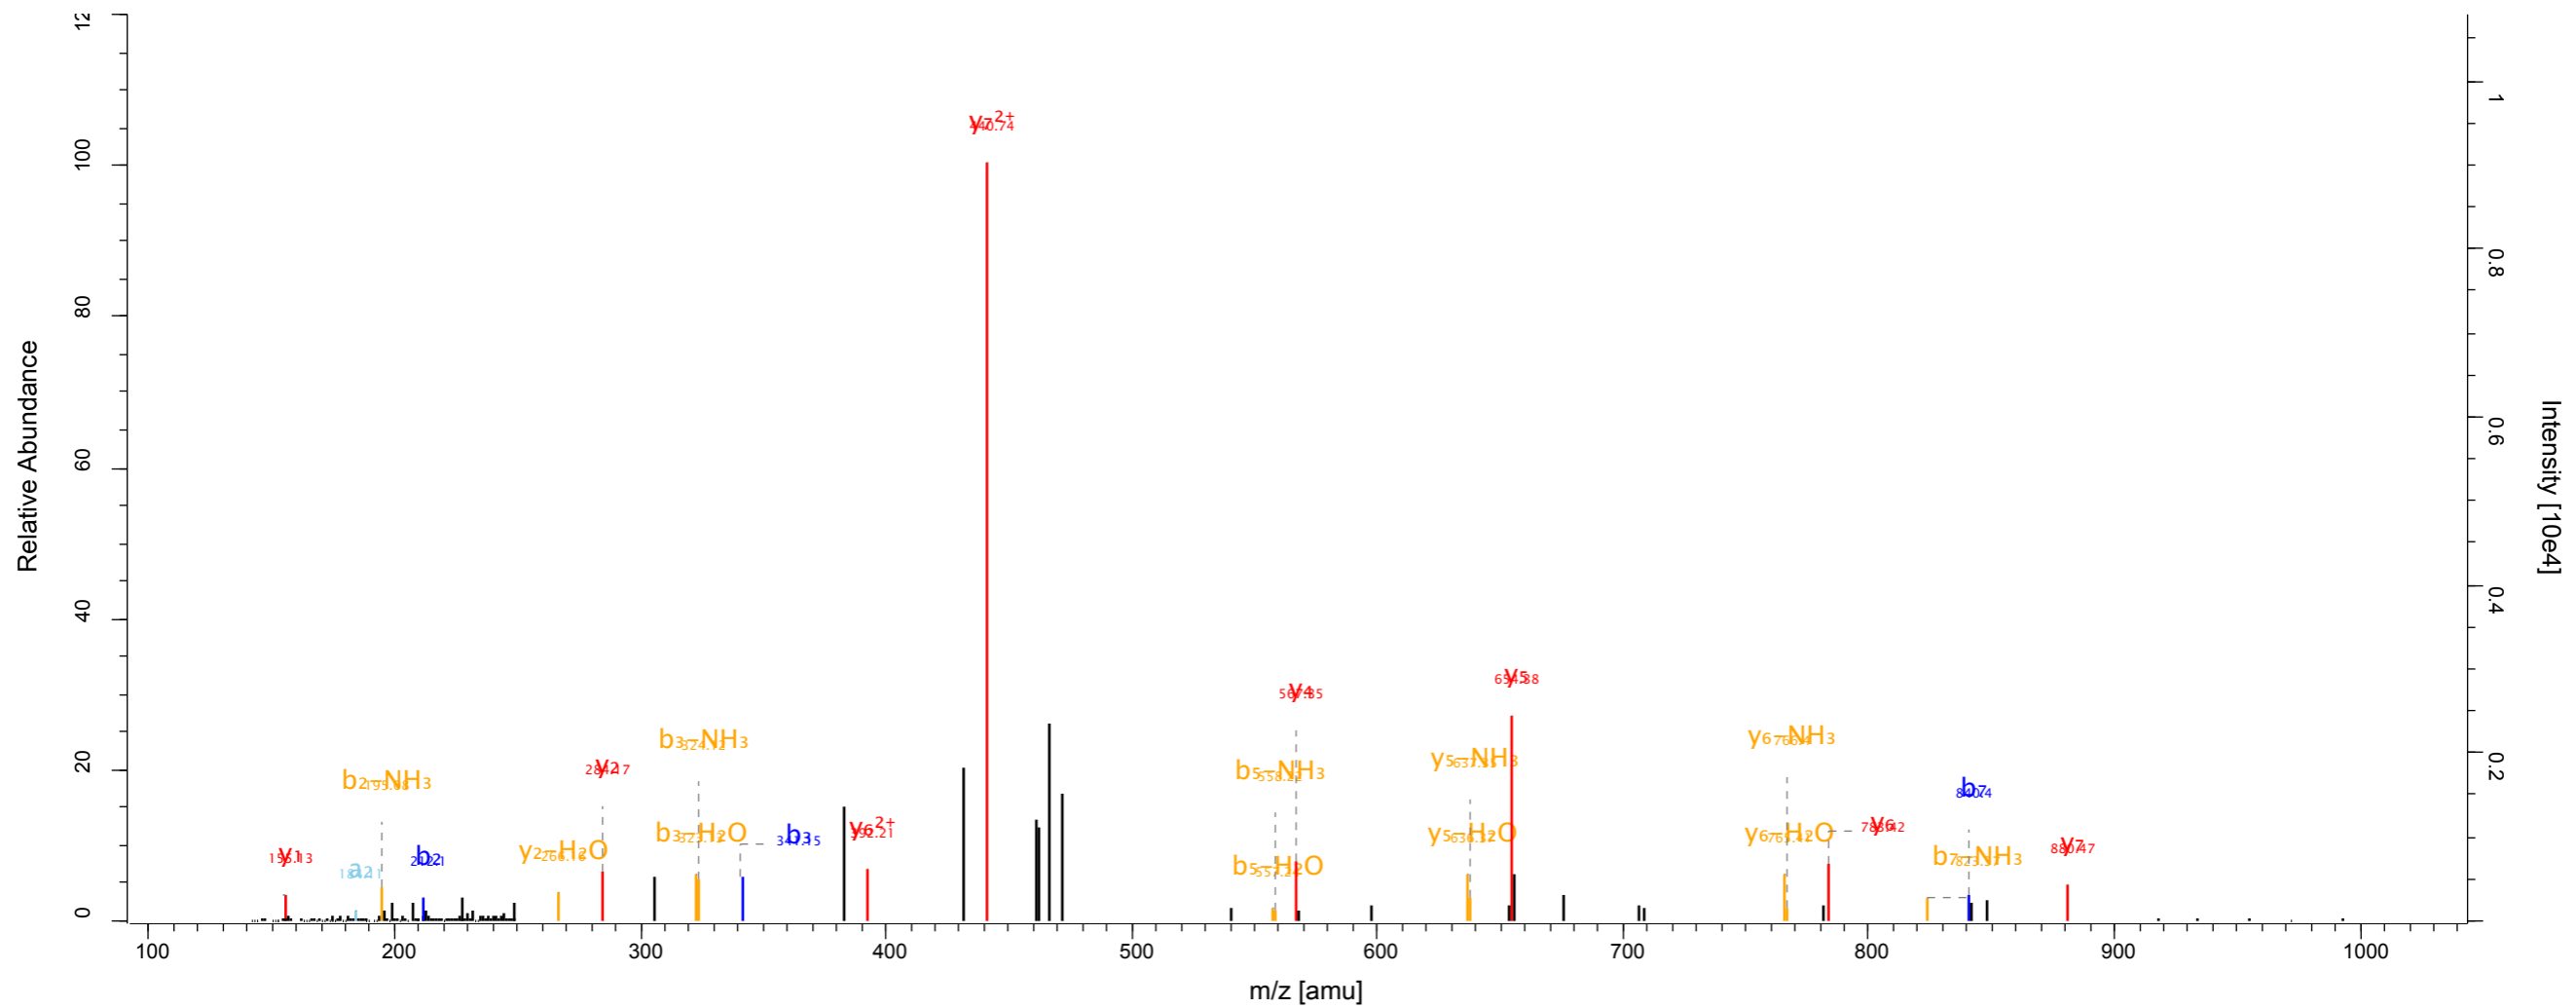

Scan number 1697 Raw file SKaraca\_LMB\_TCE\_Forward\_21\_191011\_rep3  
 Method ITMS; CID Pepti... 172.17

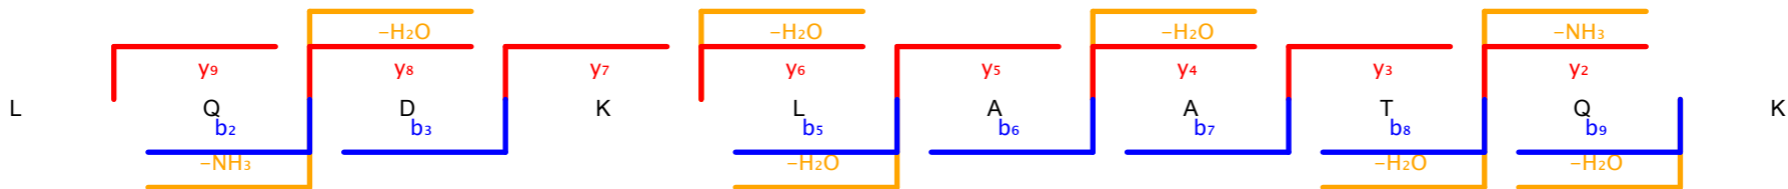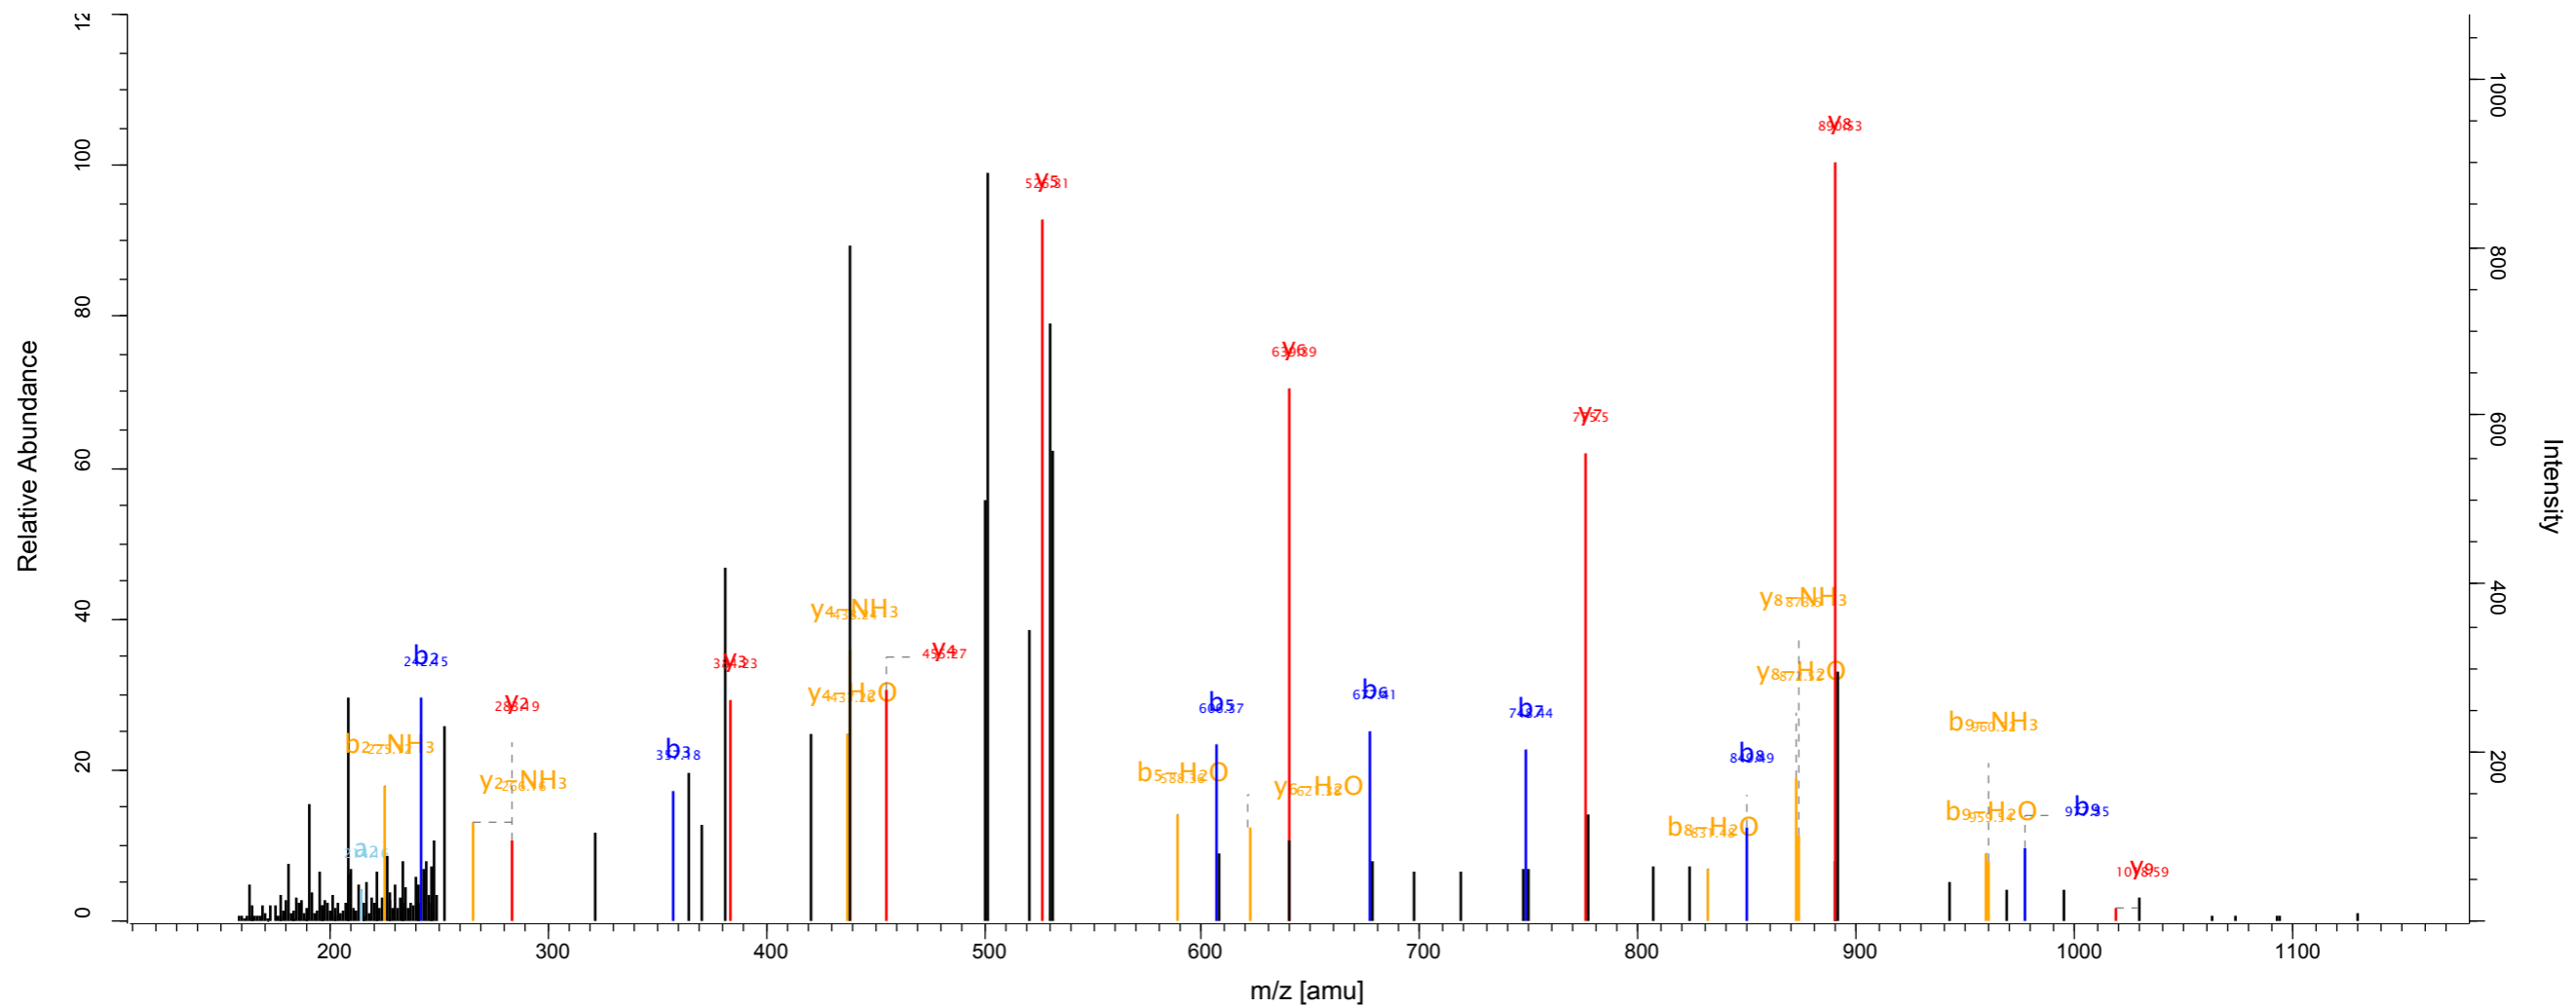

|             |           |          |                                        |
|-------------|-----------|----------|----------------------------------------|
| Scan number | 3713      | Raw file | SKaraca_LMB_TCE_Forward_21_191011_rep3 |
| Method      | ITMS; CID | Pepti... | 89.26                                  |

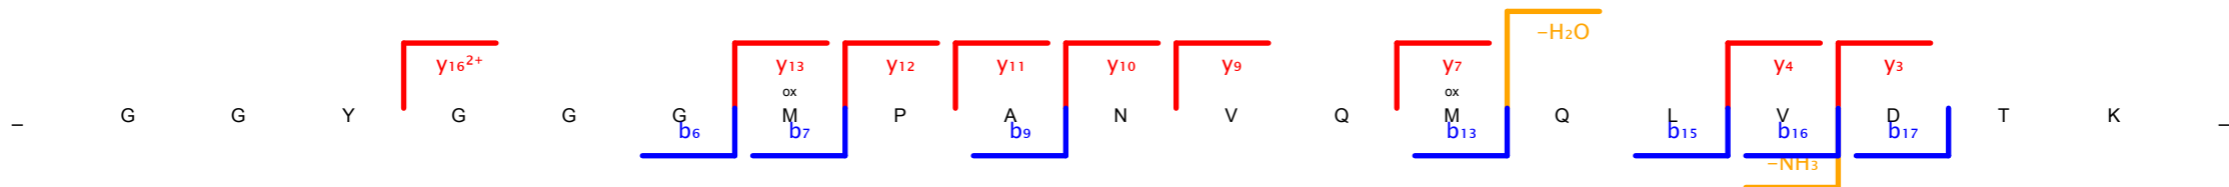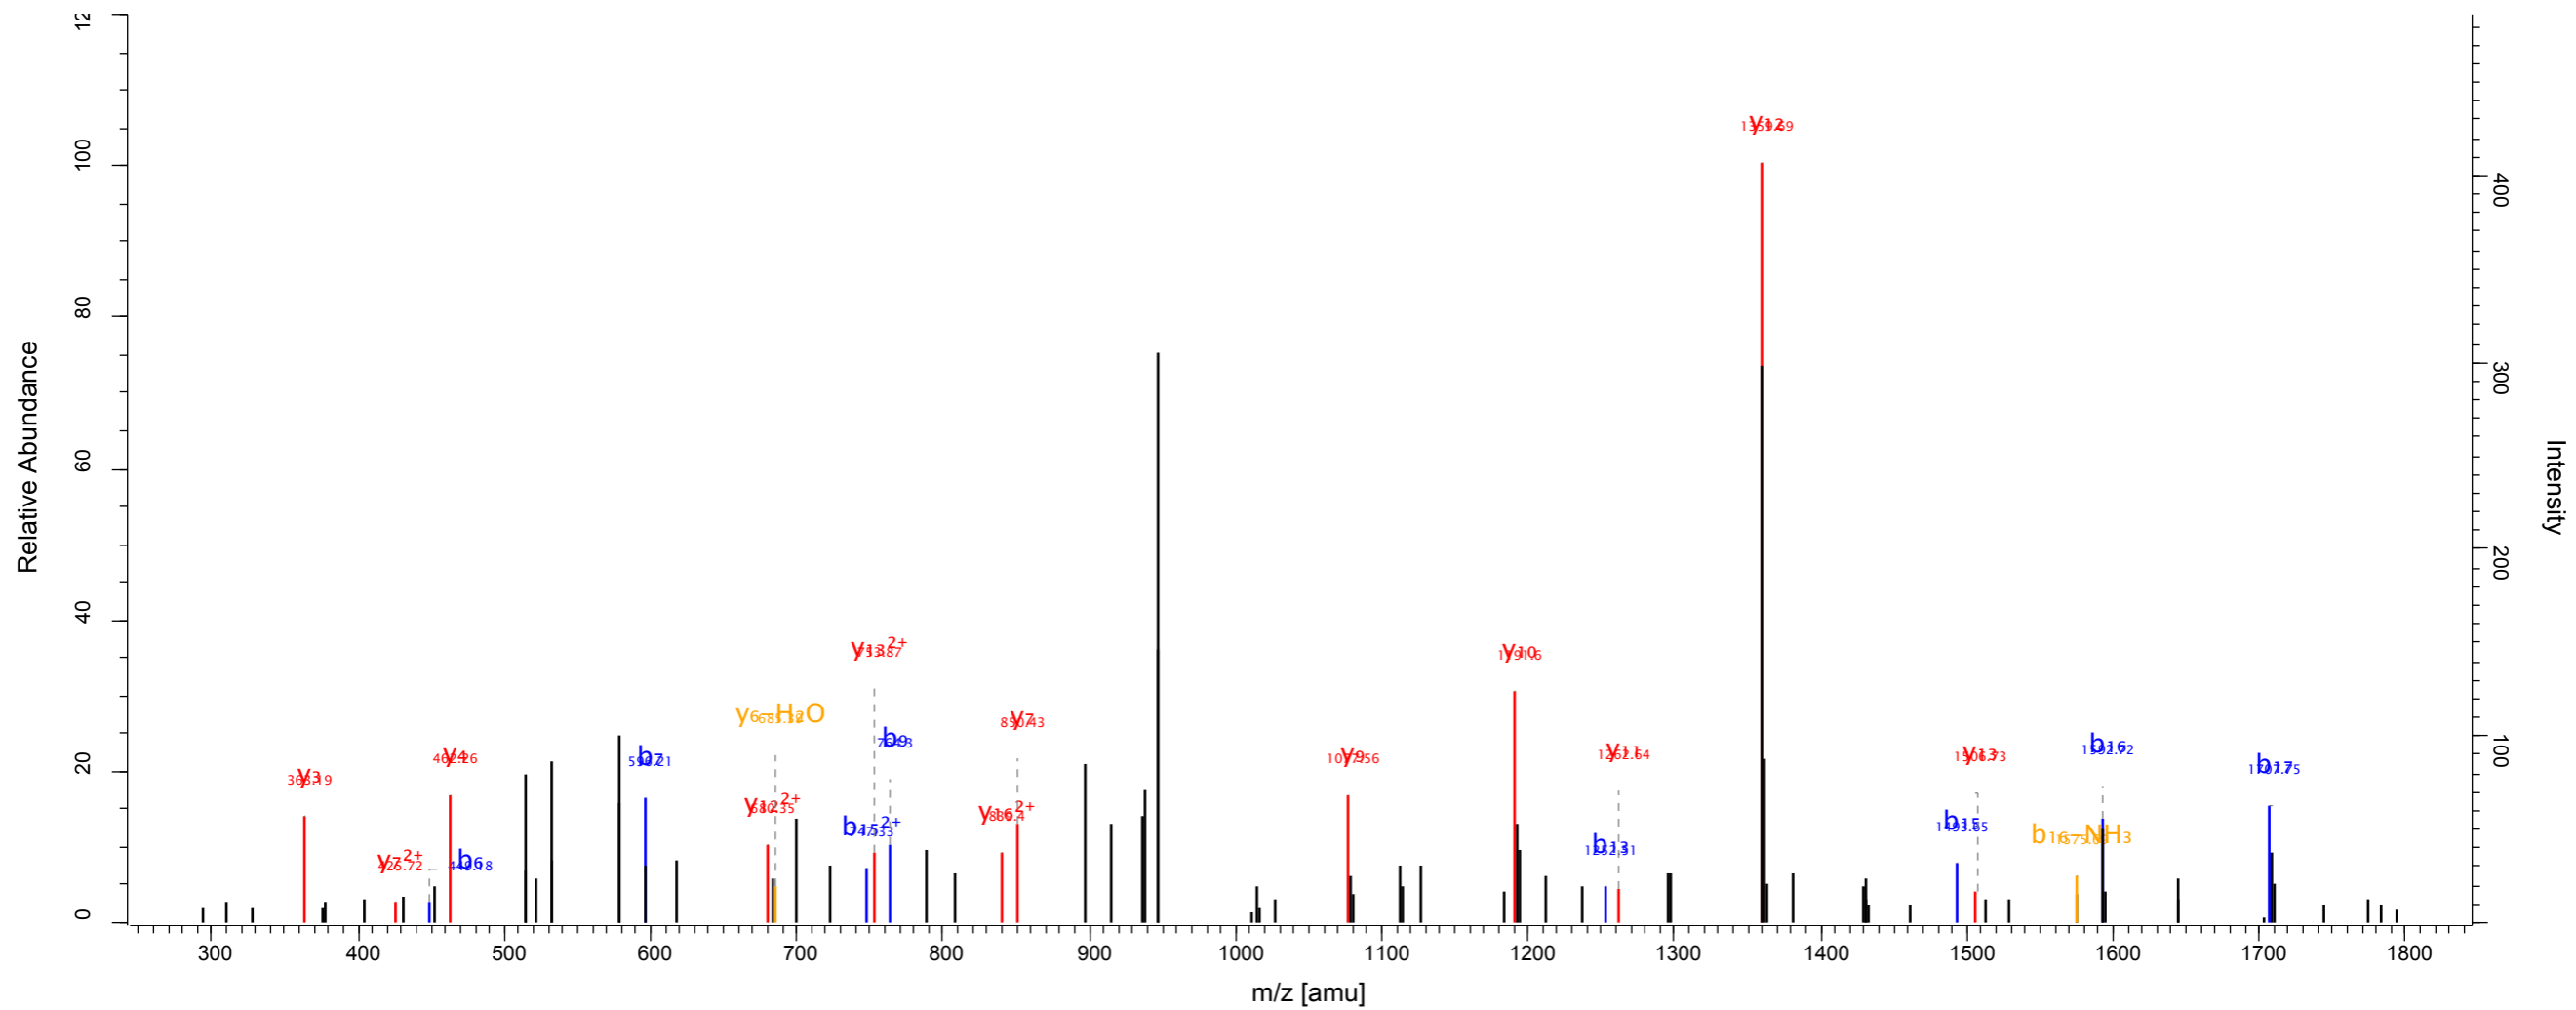

Scan number 5578 Raw file SKaraca\_LMB\_TCE\_Forward\_21\_191011\_rep3  
Method ITMS; CID Pepti... 130.56

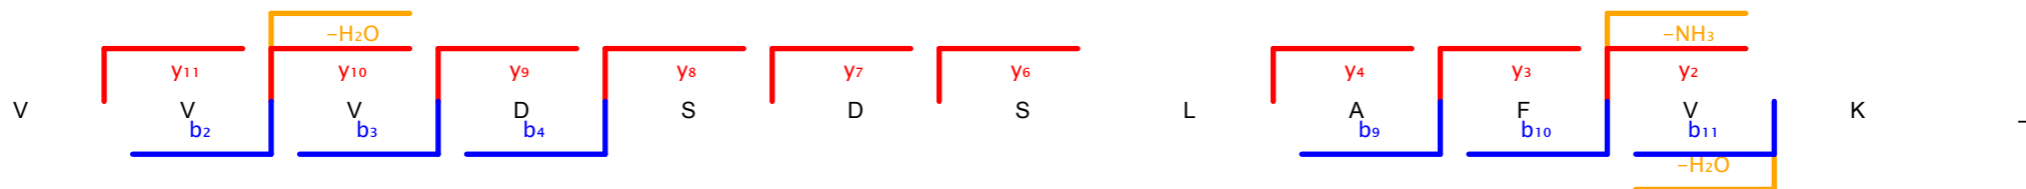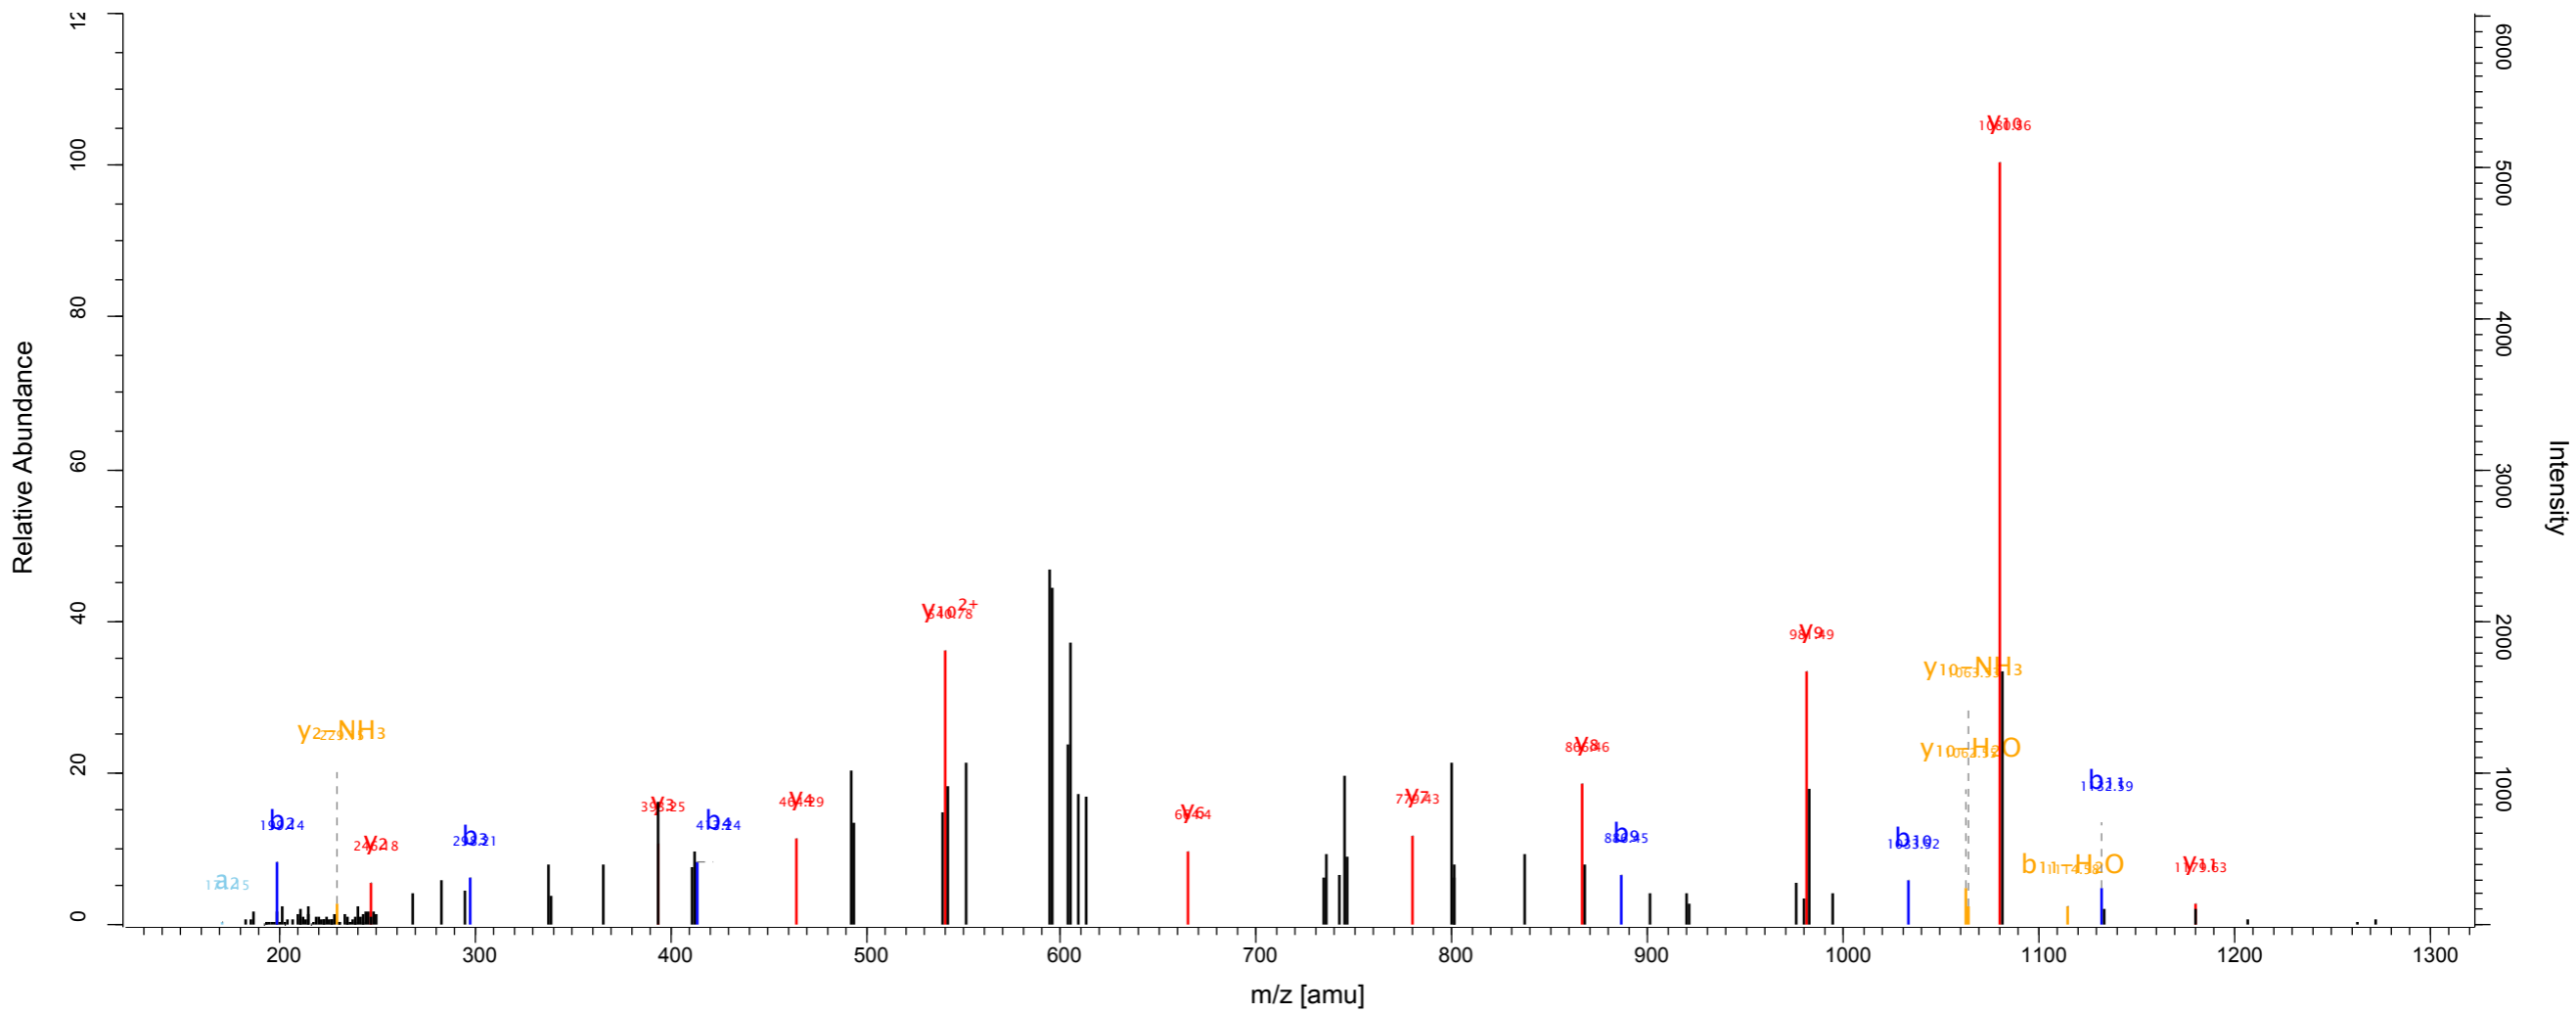

Scan number 6134 Raw file SKaraca\_LMB\_TCE\_Forward\_21\_191011\_rep3  
 Method ITMS; CID Pepti... 105.03

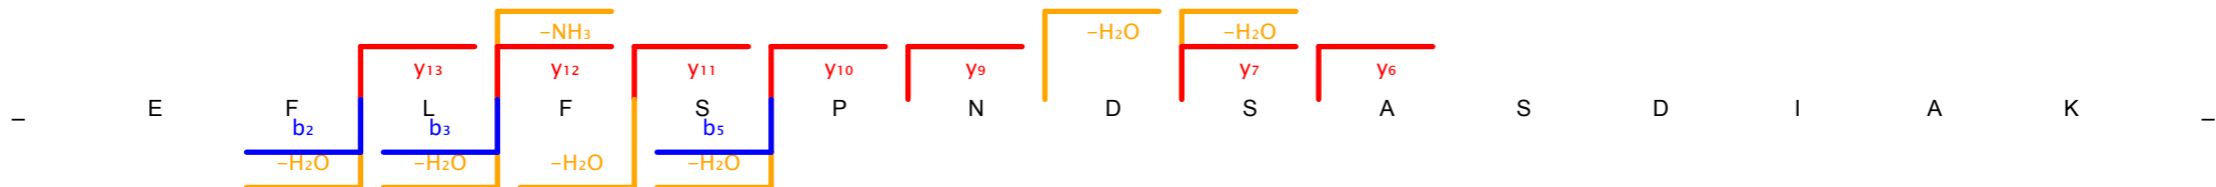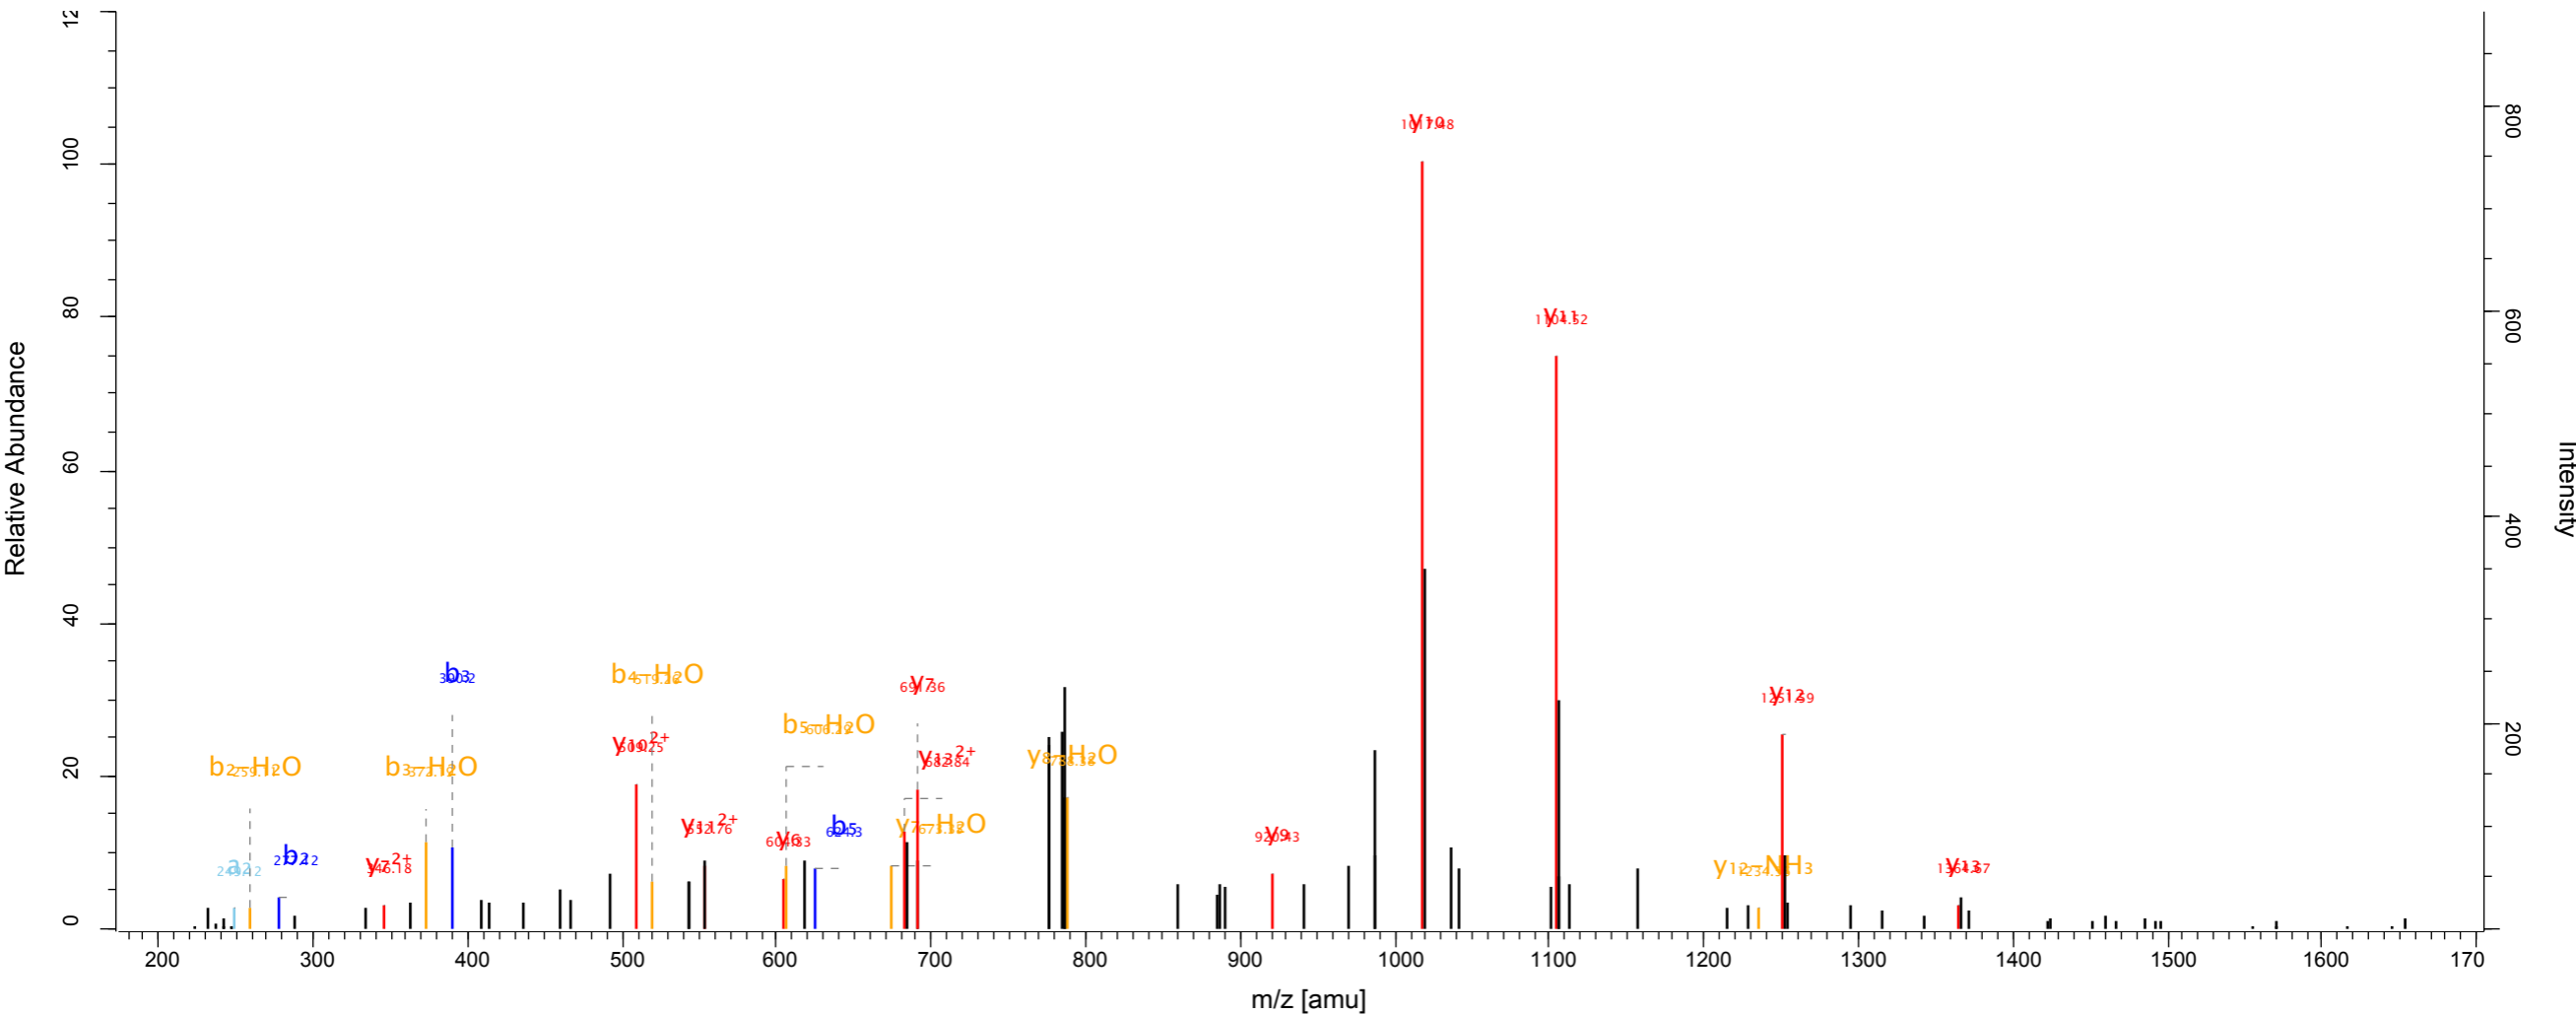

Scan number 6307 Raw file SKaraca\_LMB\_TCE\_Forward\_21\_191011\_rep3  
 Method ITMS; CID Pepti... 164.65

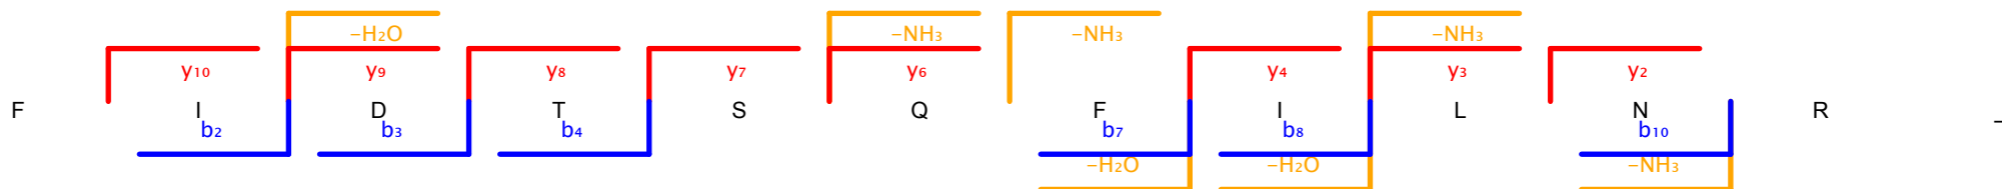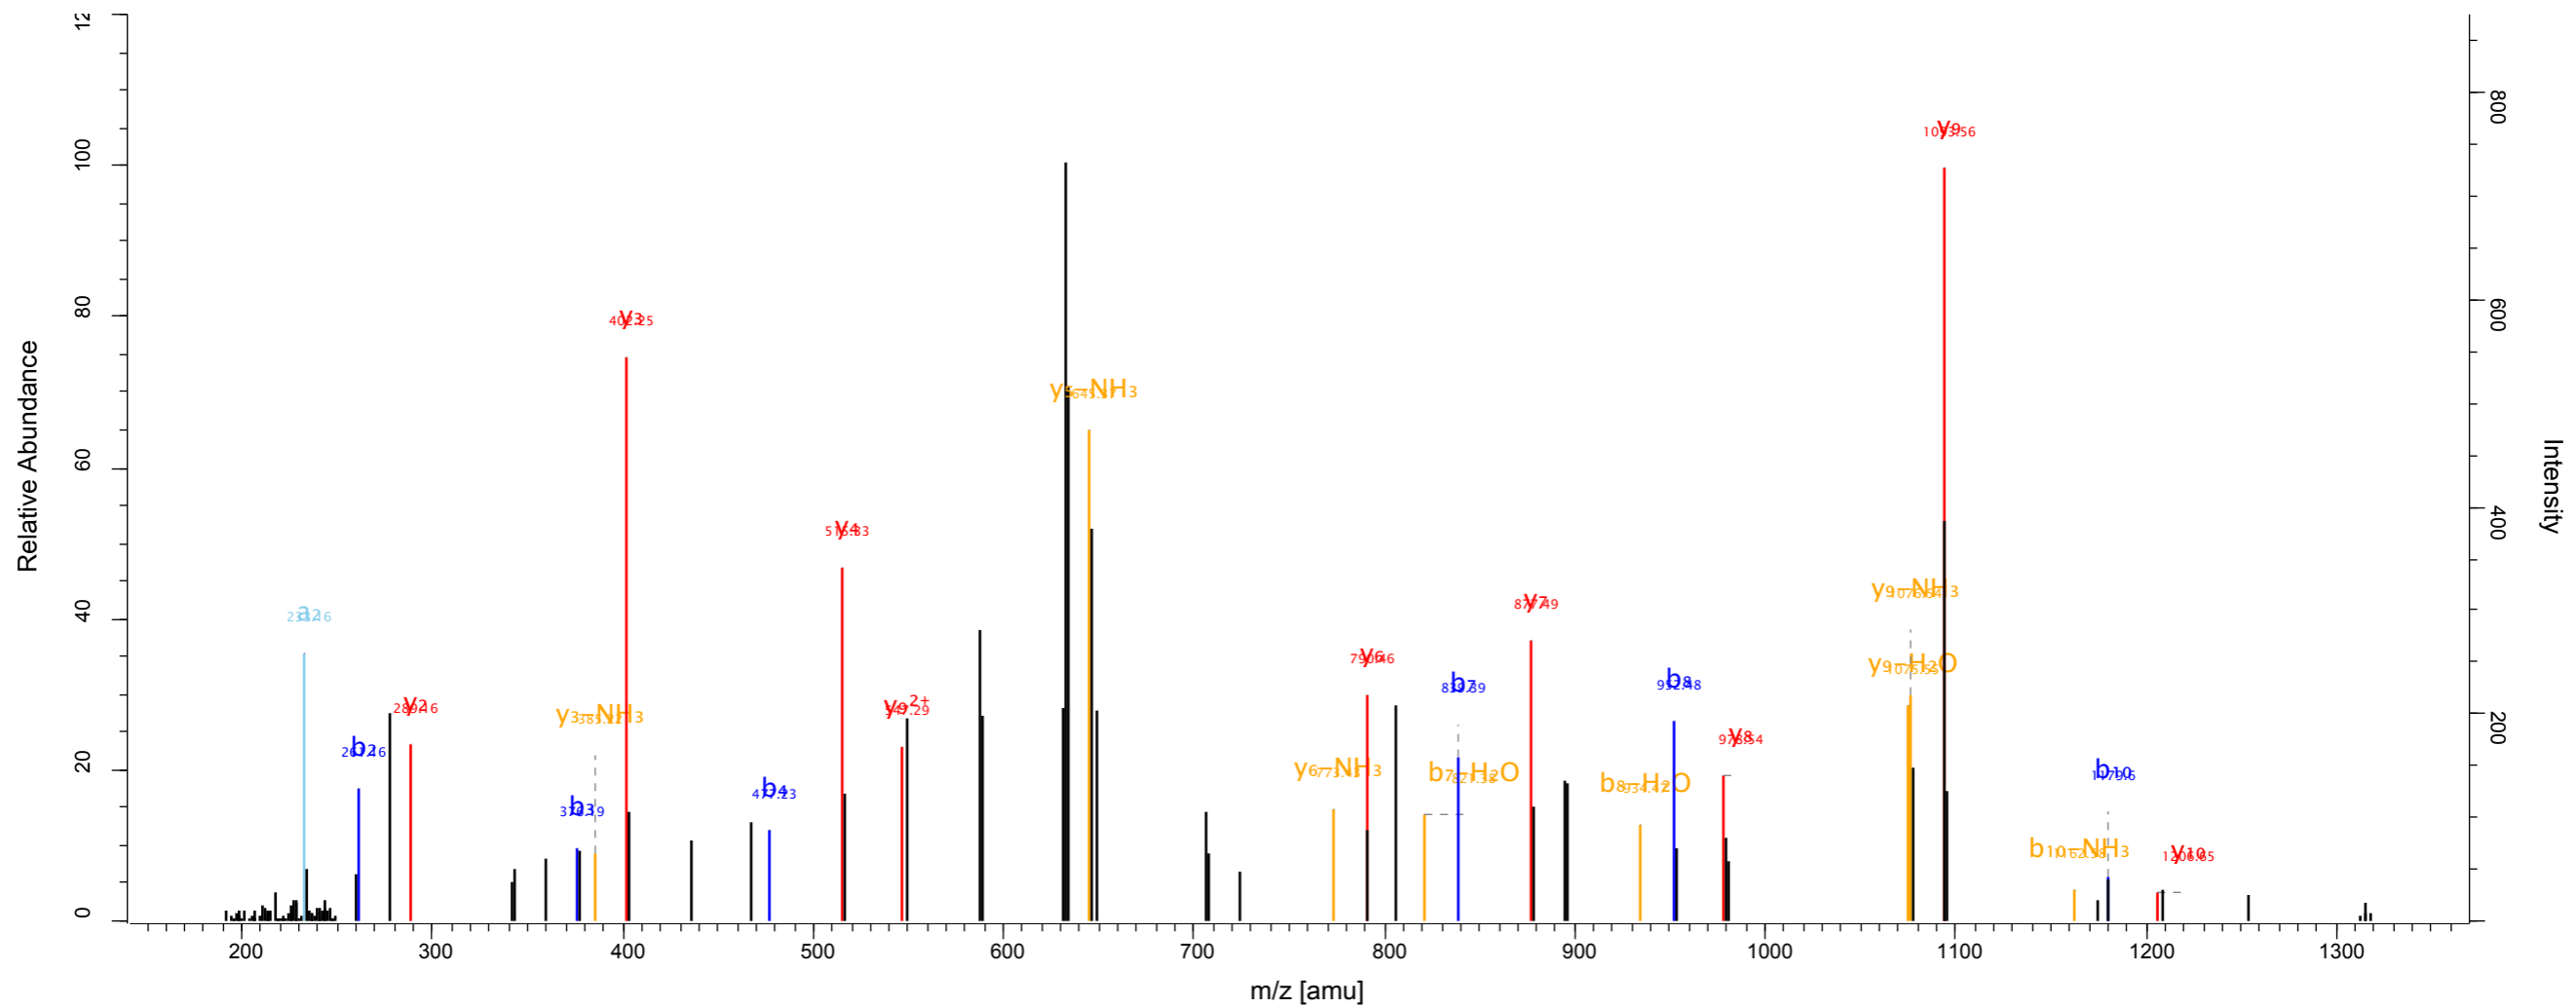

Scan number 8312 Raw file SKaraca\_LMB\_TCE\_Forward\_21\_191011\_rep3  
 Method ITMS; CID Pepti... 124.42

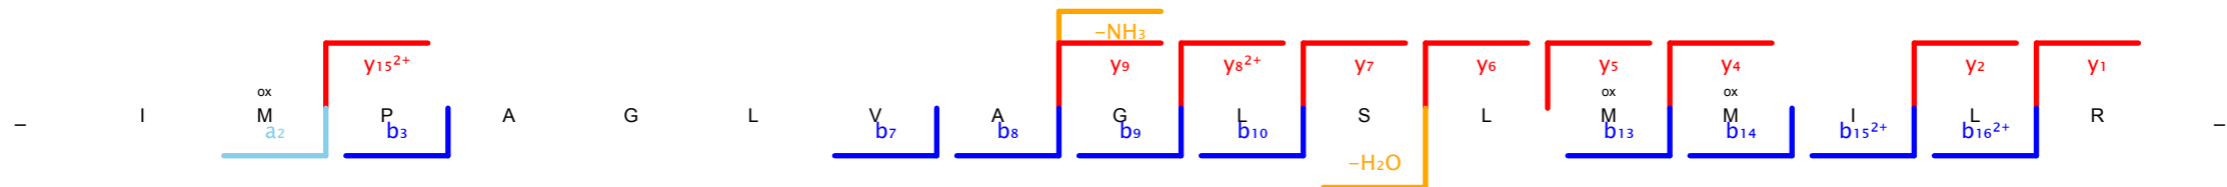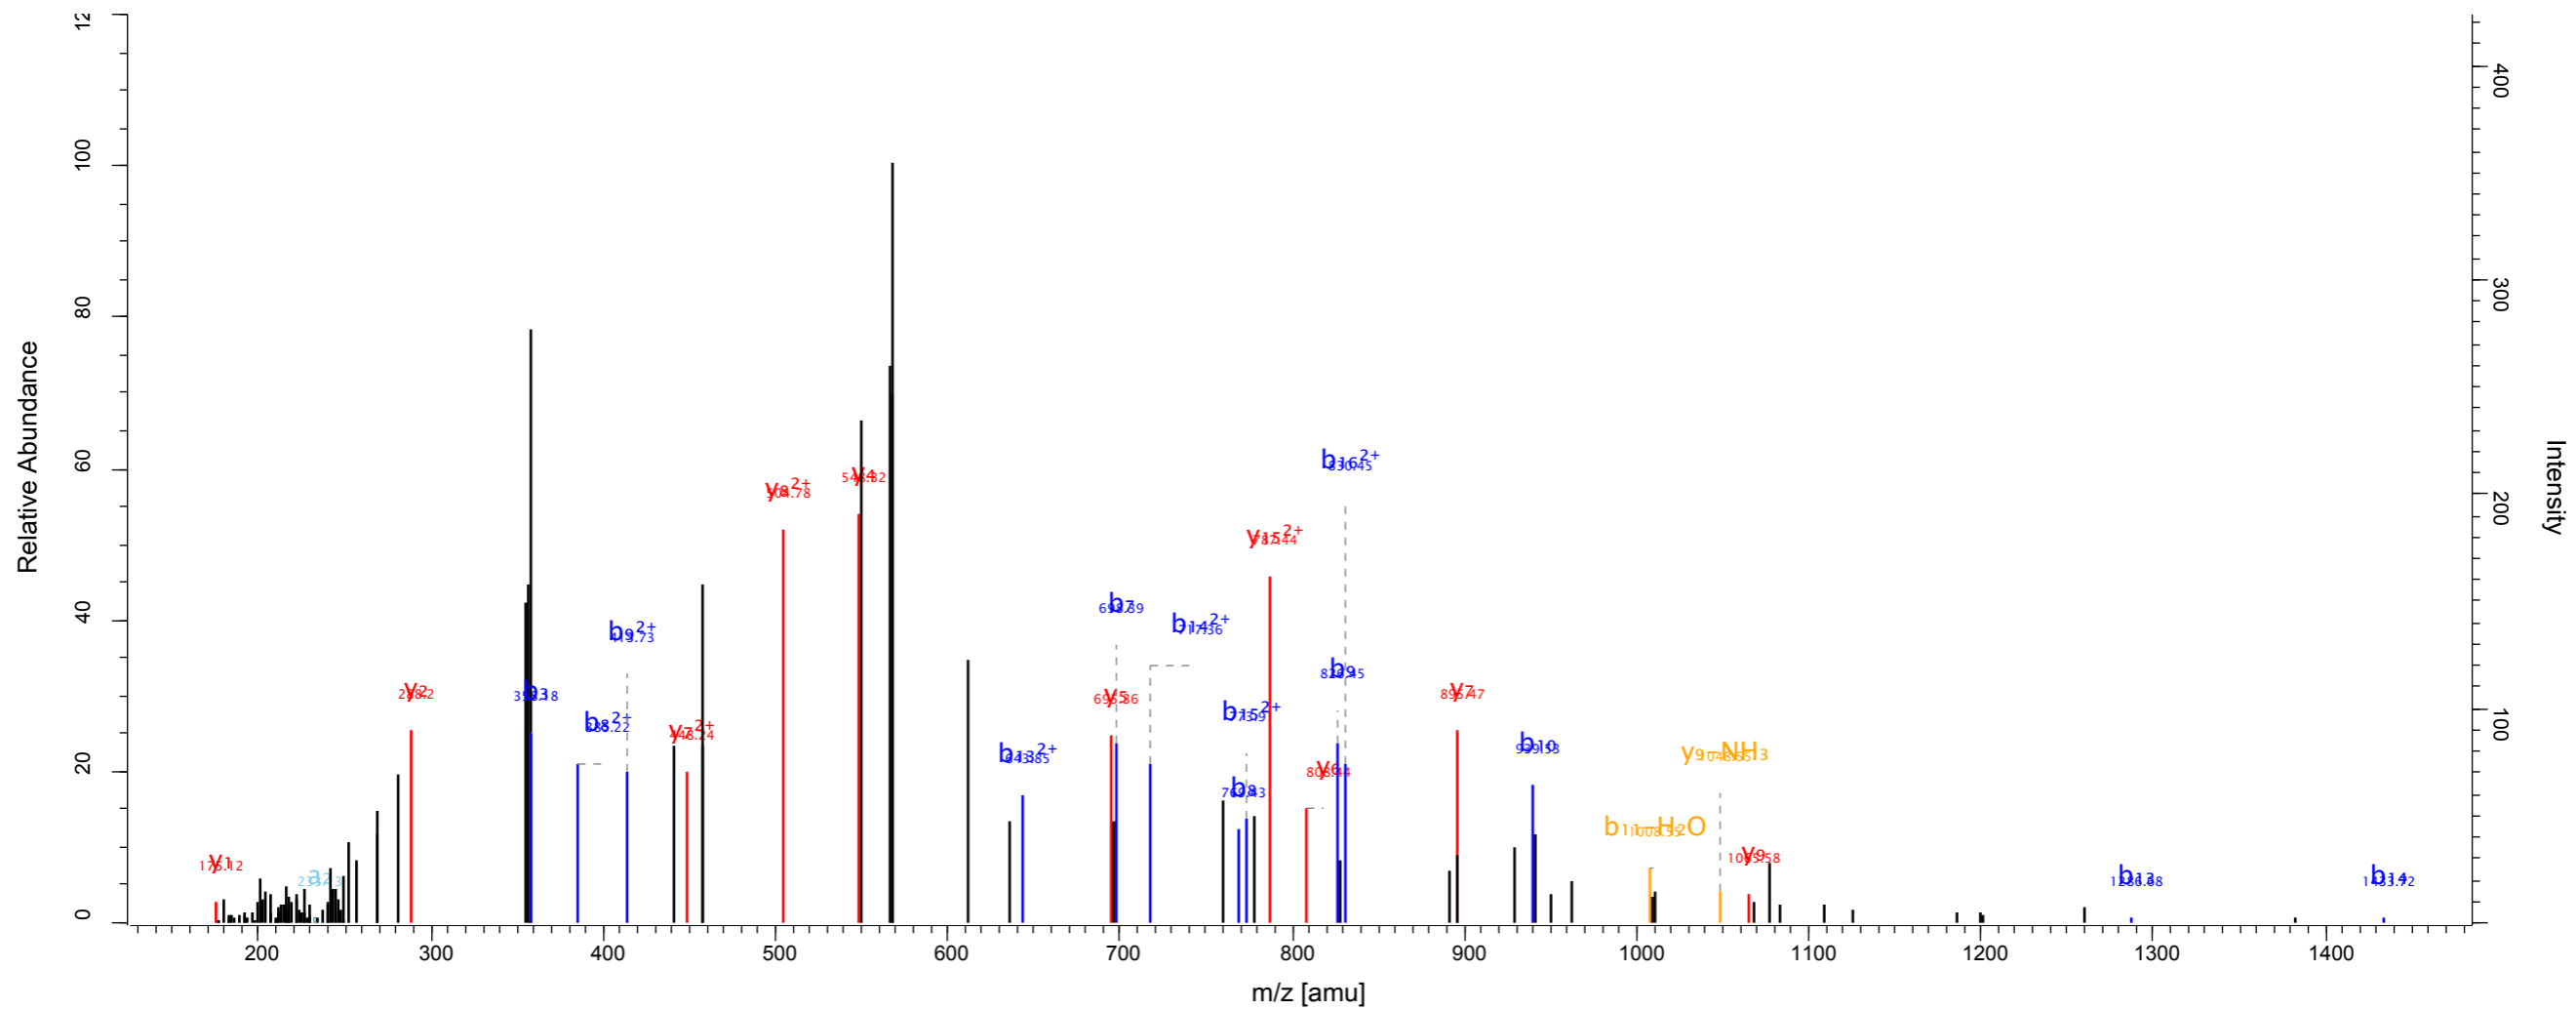



Scan number 1446 Raw file SKaraca\_LMB\_TCE\_Forward\_22\_191011\_rep1  
 Method ITMS; CID Pepti... 150.04

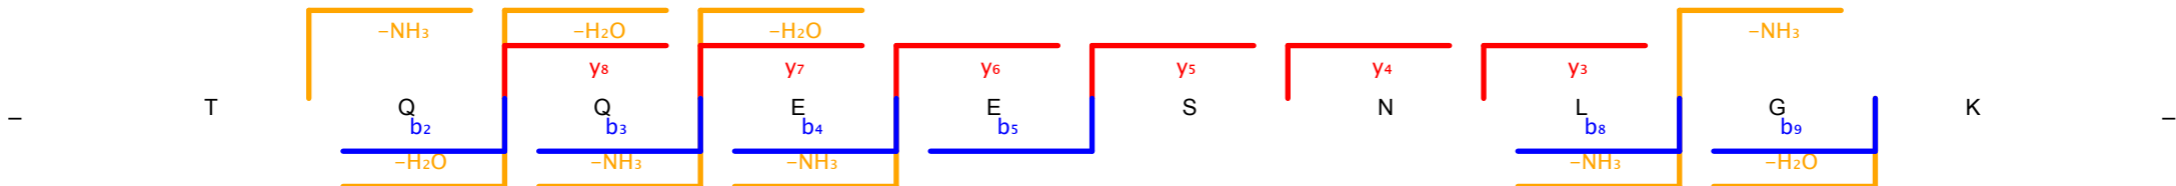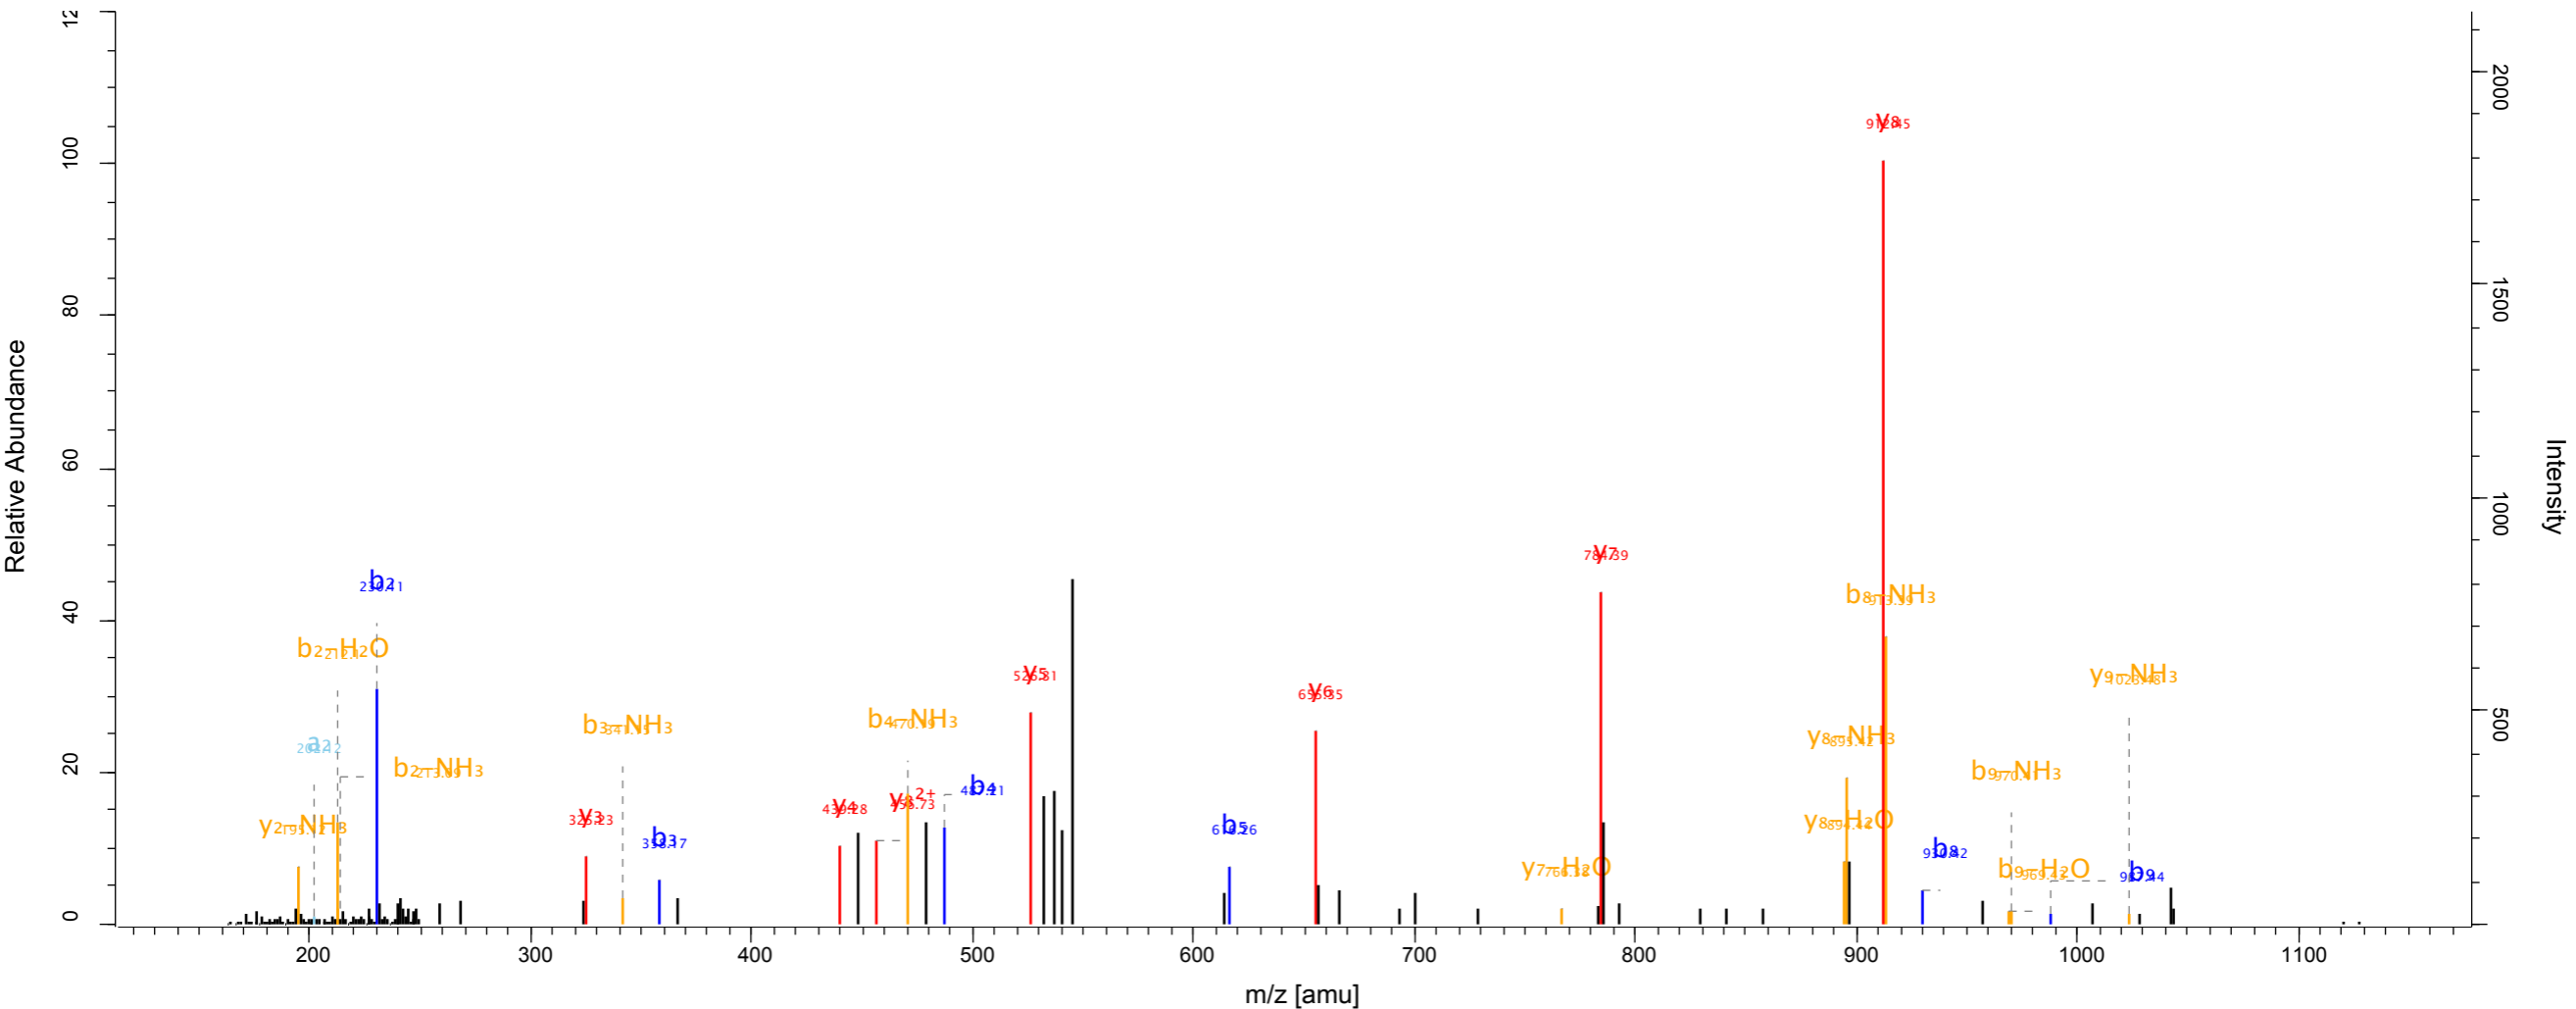

Scan number 3762 Raw file SKaraca\_LMB\_TCE\_Forward\_22\_191011\_rep1  
 Method ITMS; CID Pepti... 98.23

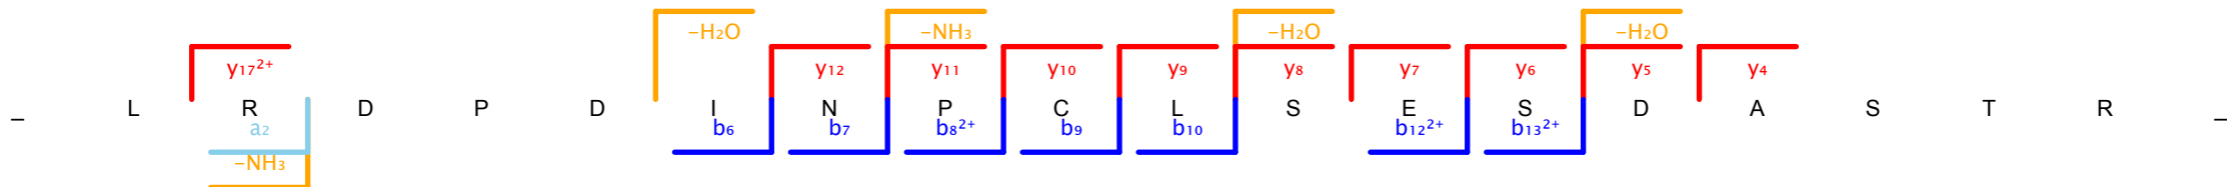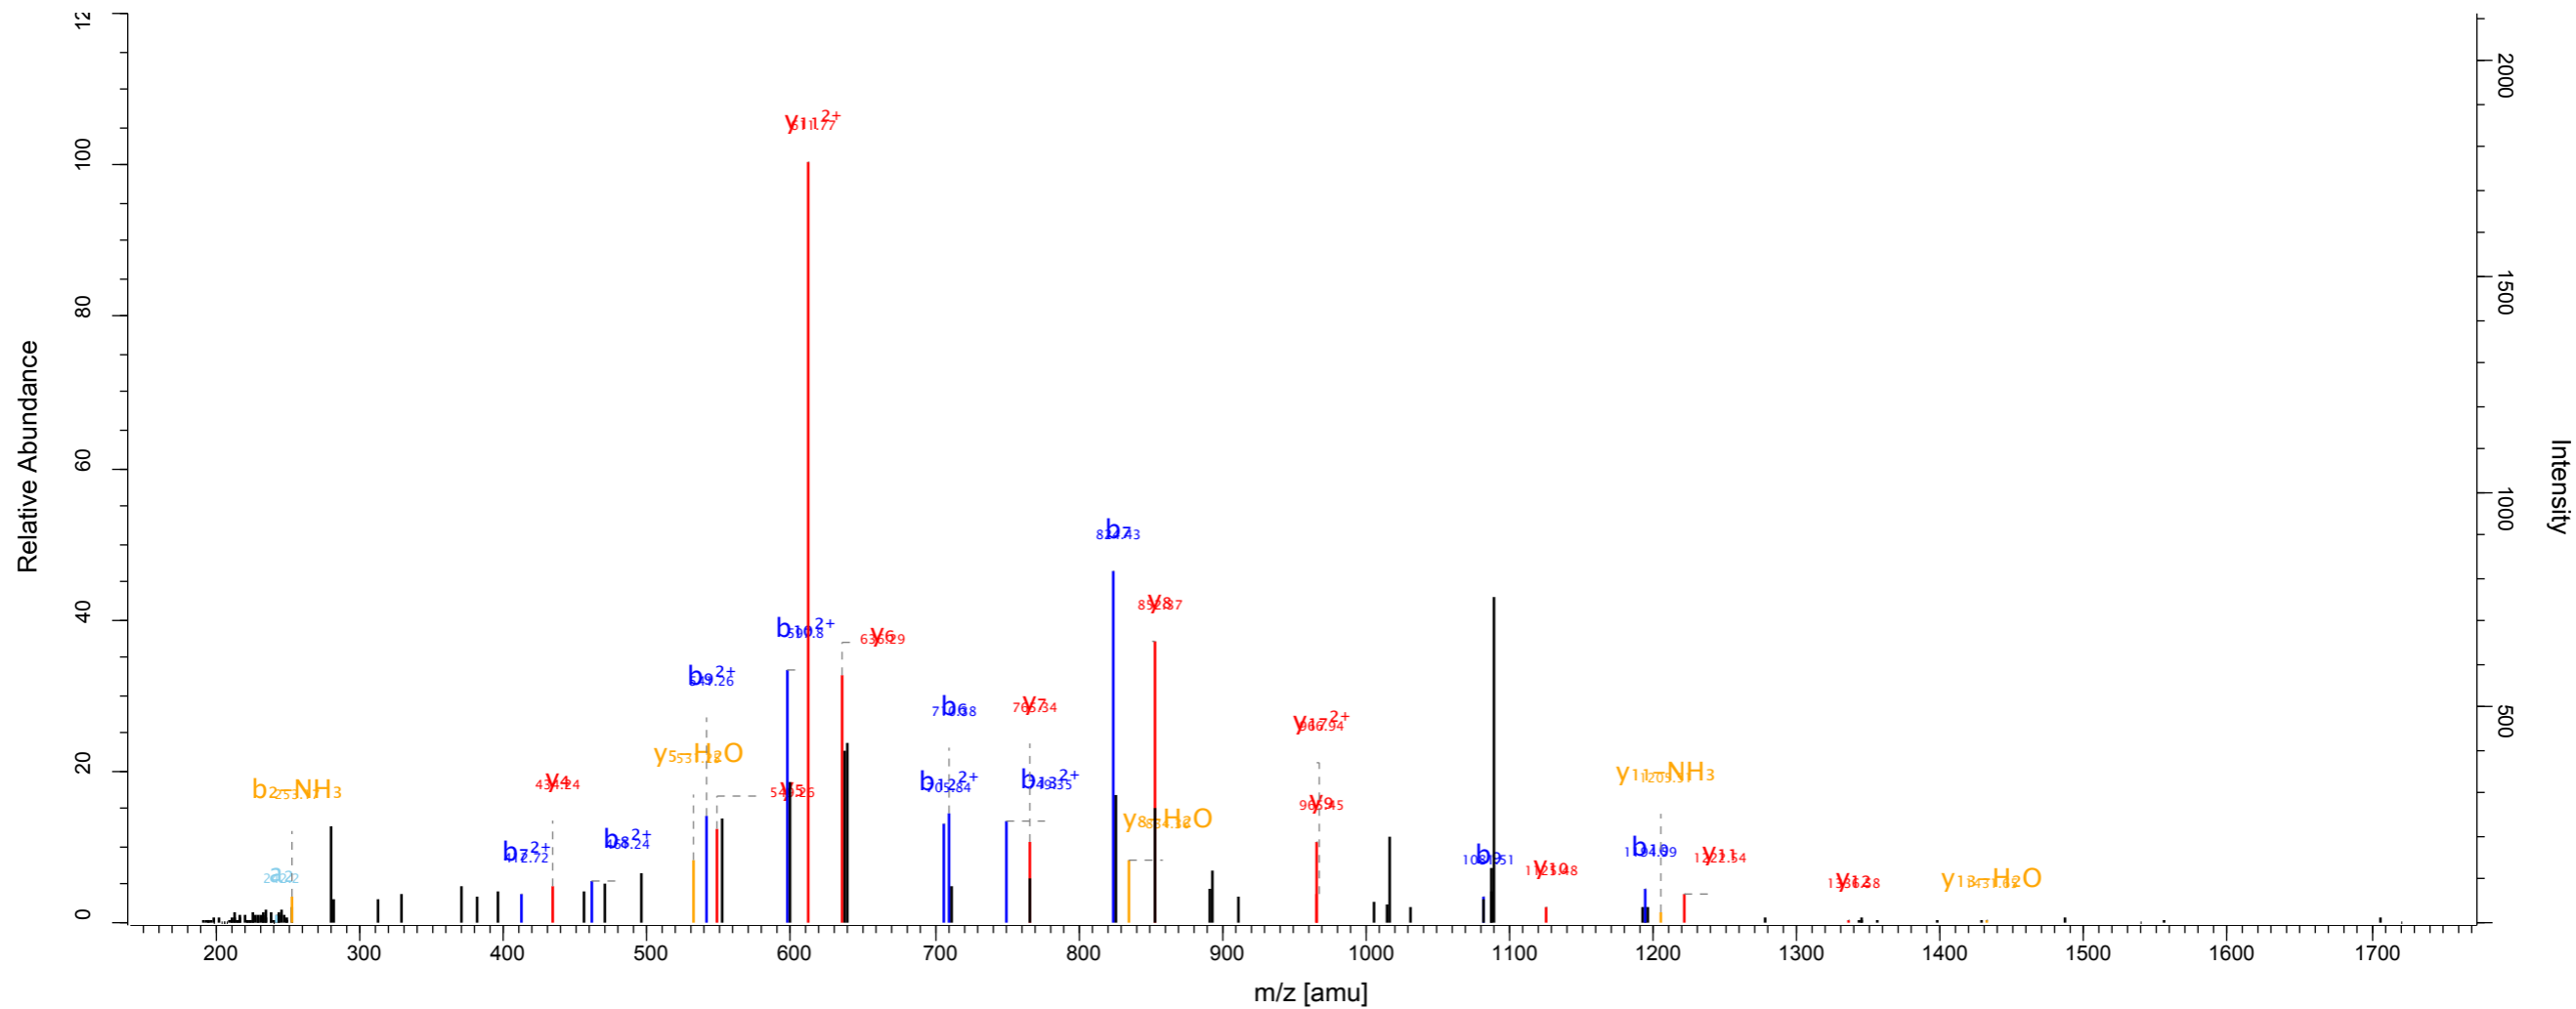

|             |           |          |                                        |
|-------------|-----------|----------|----------------------------------------|
| Scan number | 4563      | Raw file | SKaraca_LMB_TCE_Forward_22_191011_rep1 |
| Method      | ITMS; CID | Pepti... | 175.21                                 |

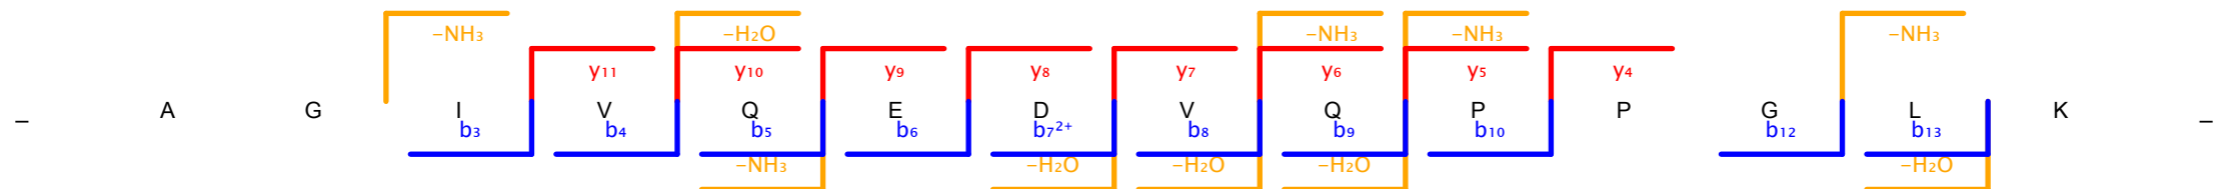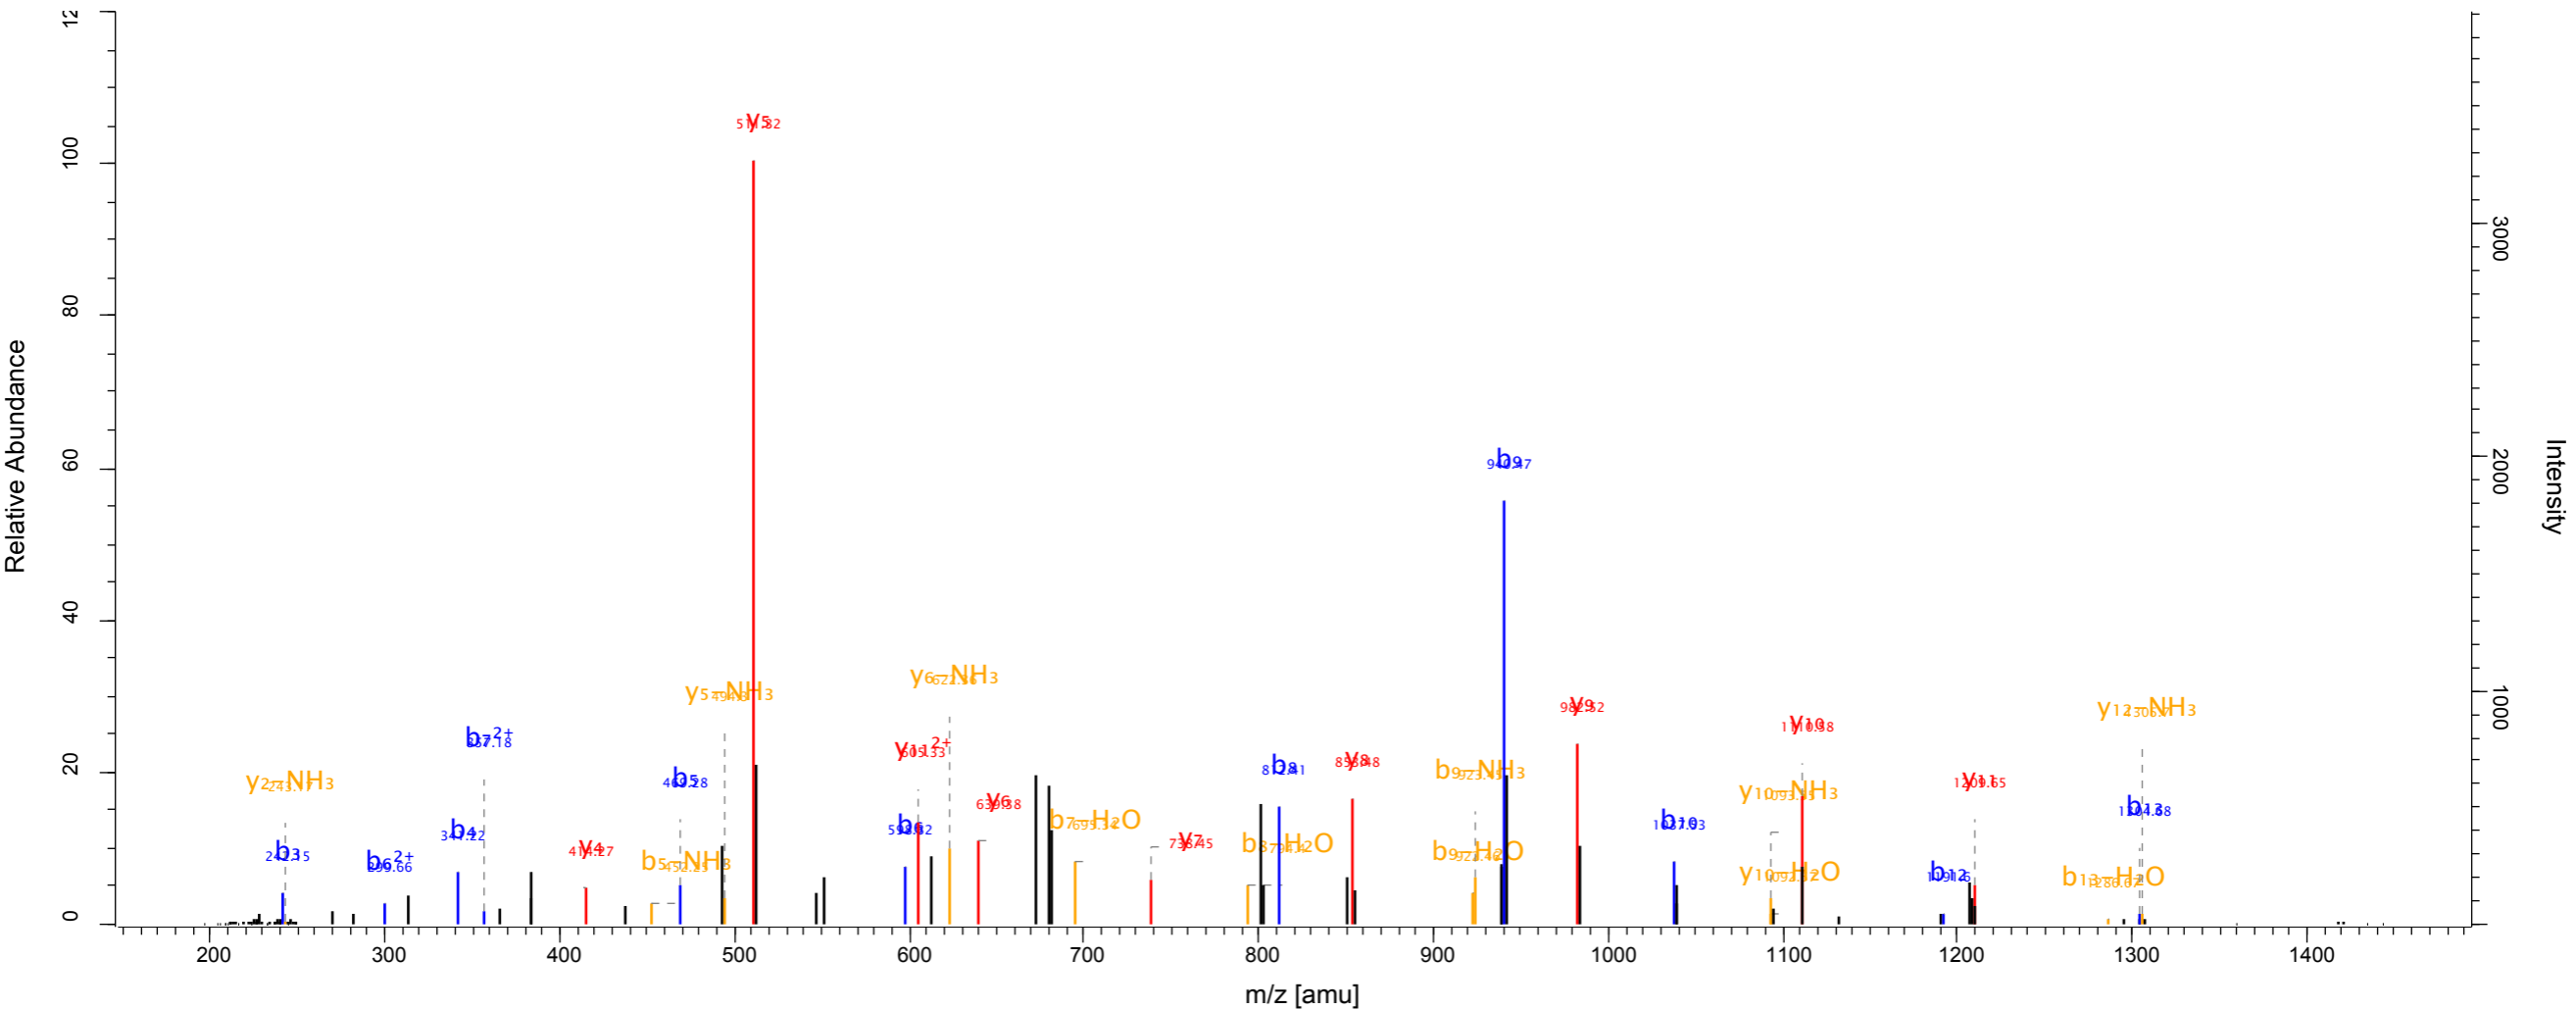

Scan number 7297 Raw file SKaraca\_LMB\_TCE\_Forward\_22\_191011\_rep1  
 Method ITMS; CID Pepti... 122.33

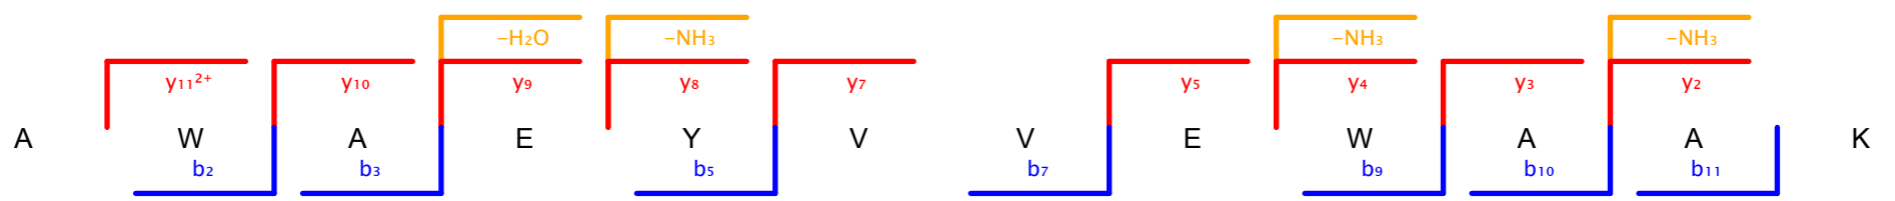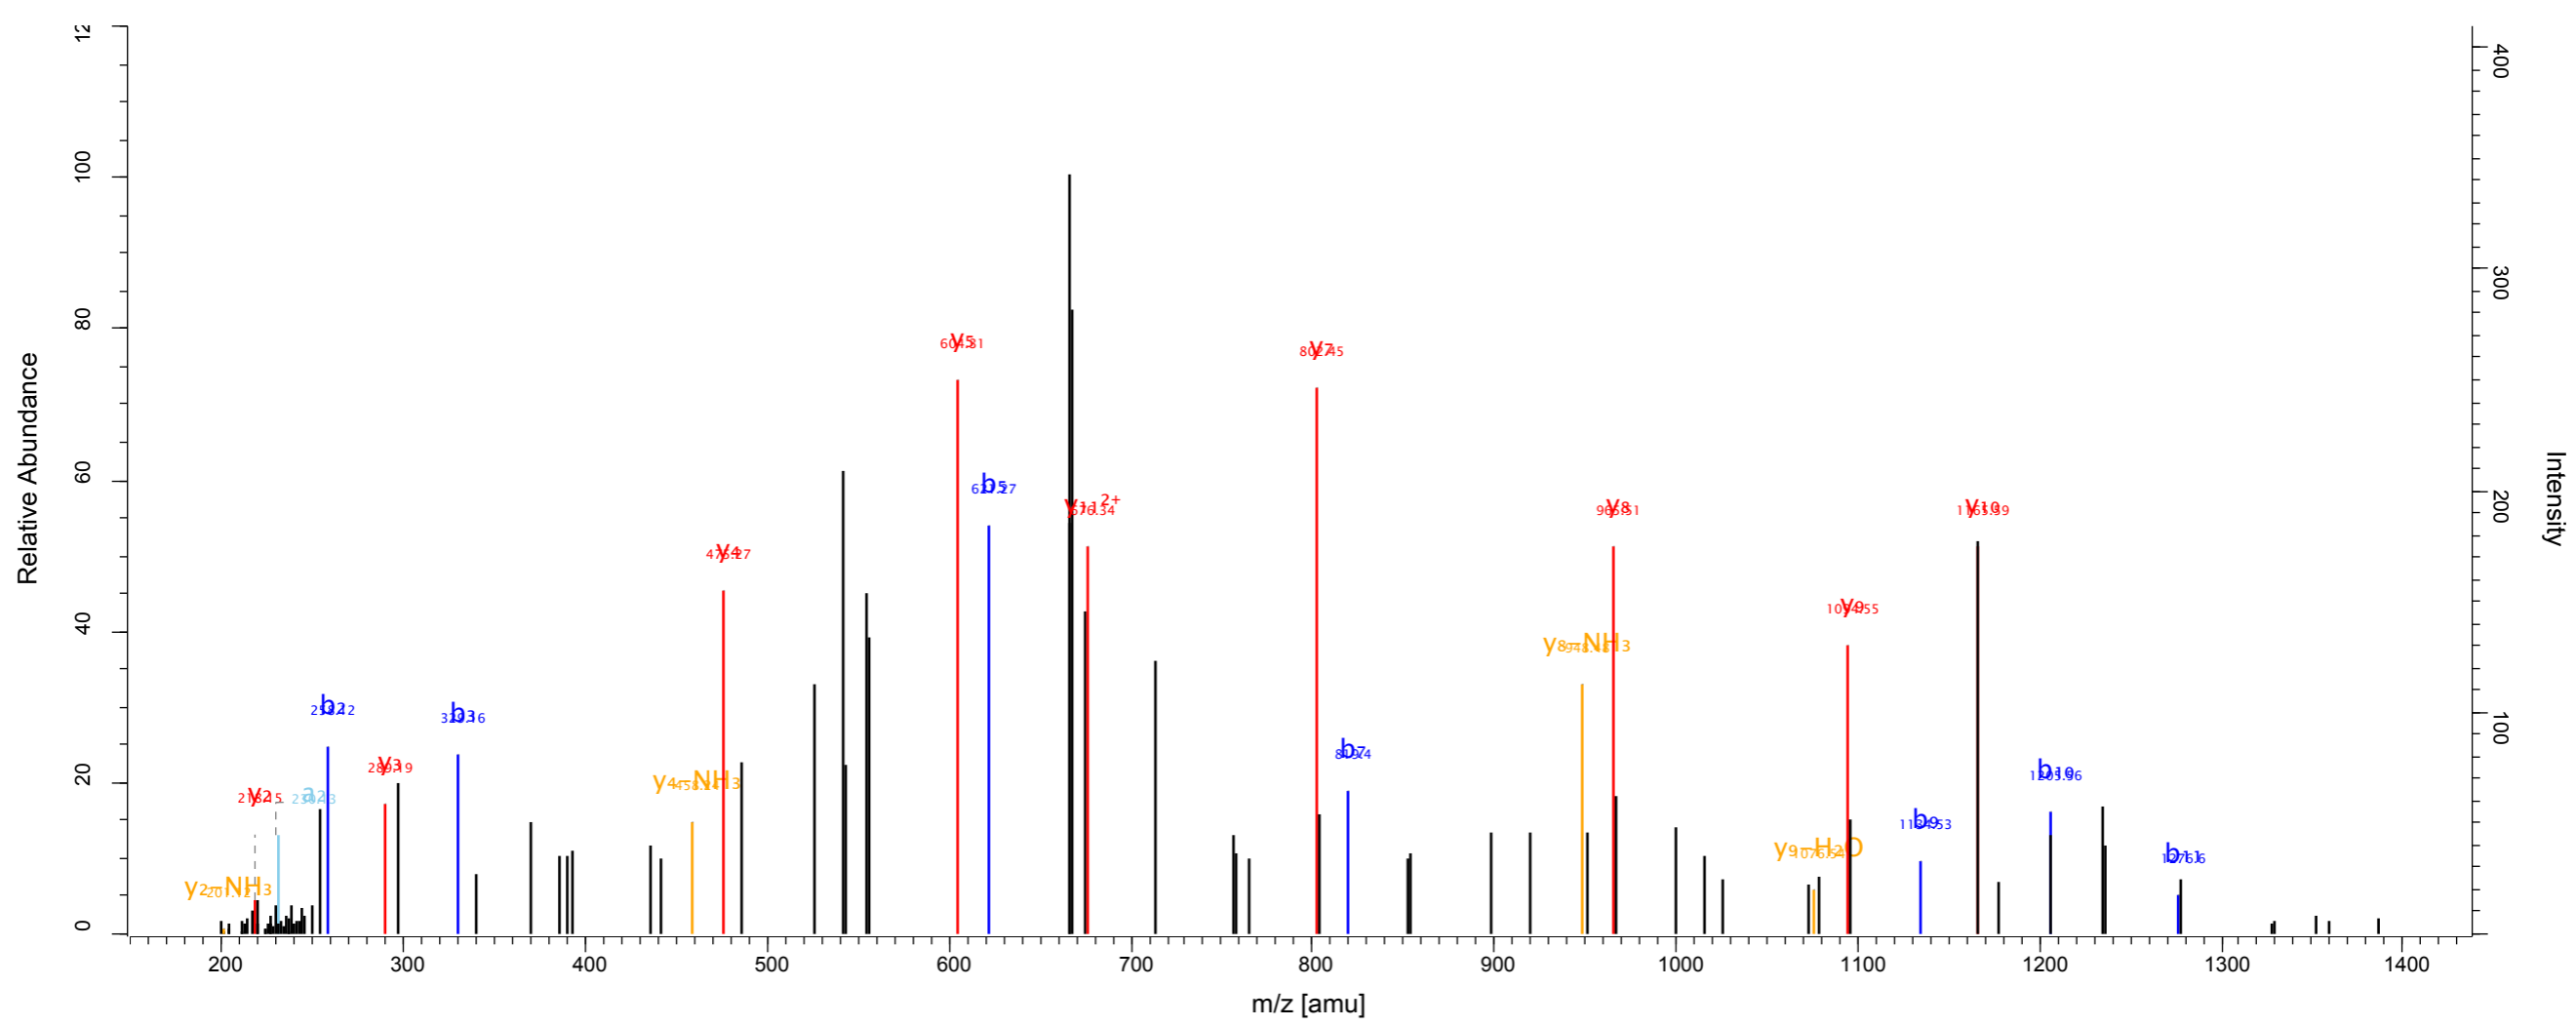

Scan number 4298 Raw file SKaraca\_LMB\_TCE\_Forward\_22\_191011\_rep2  
 Method ITMS; CID Pepti... 129.34

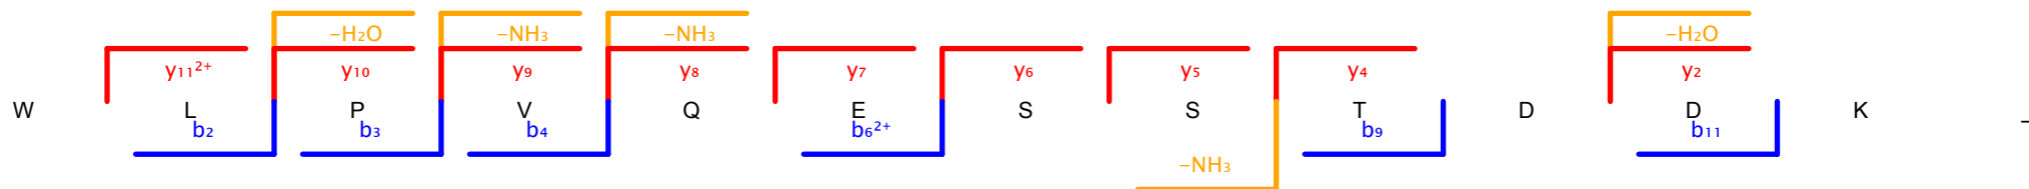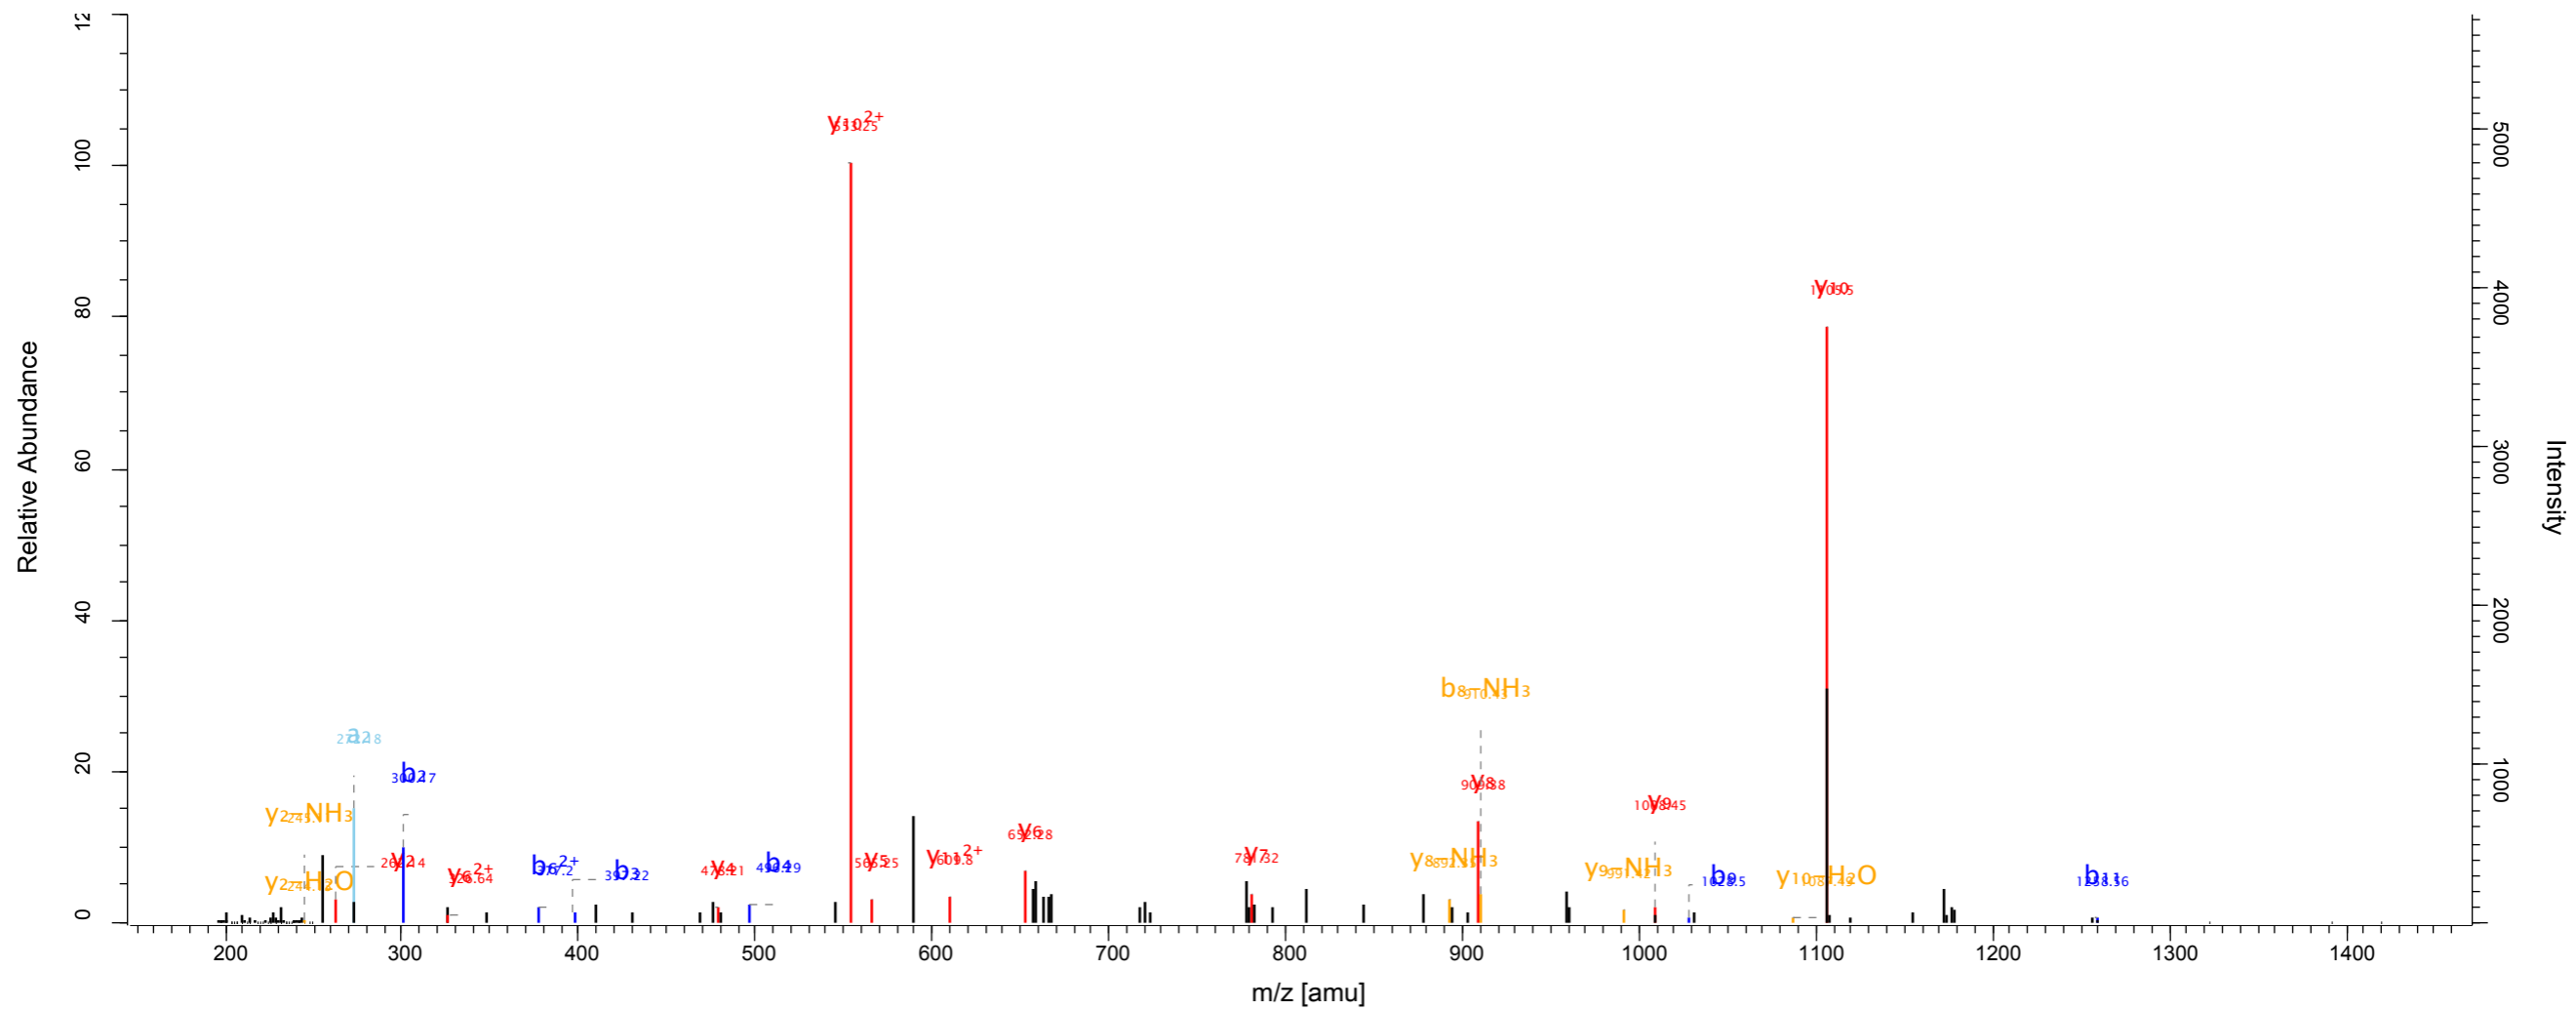

Scan number 5025 Raw file SKaraca\_LMB\_TCE\_Forward\_22\_191011\_rep2  
 Method ITMS; CID Pepti... 249.2

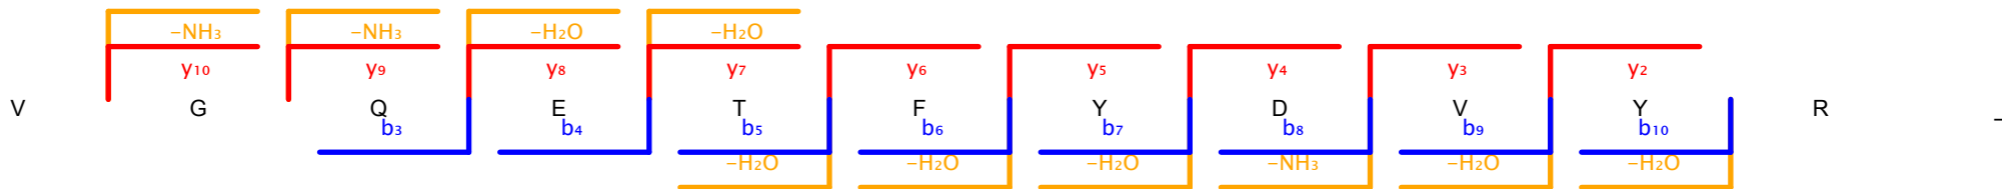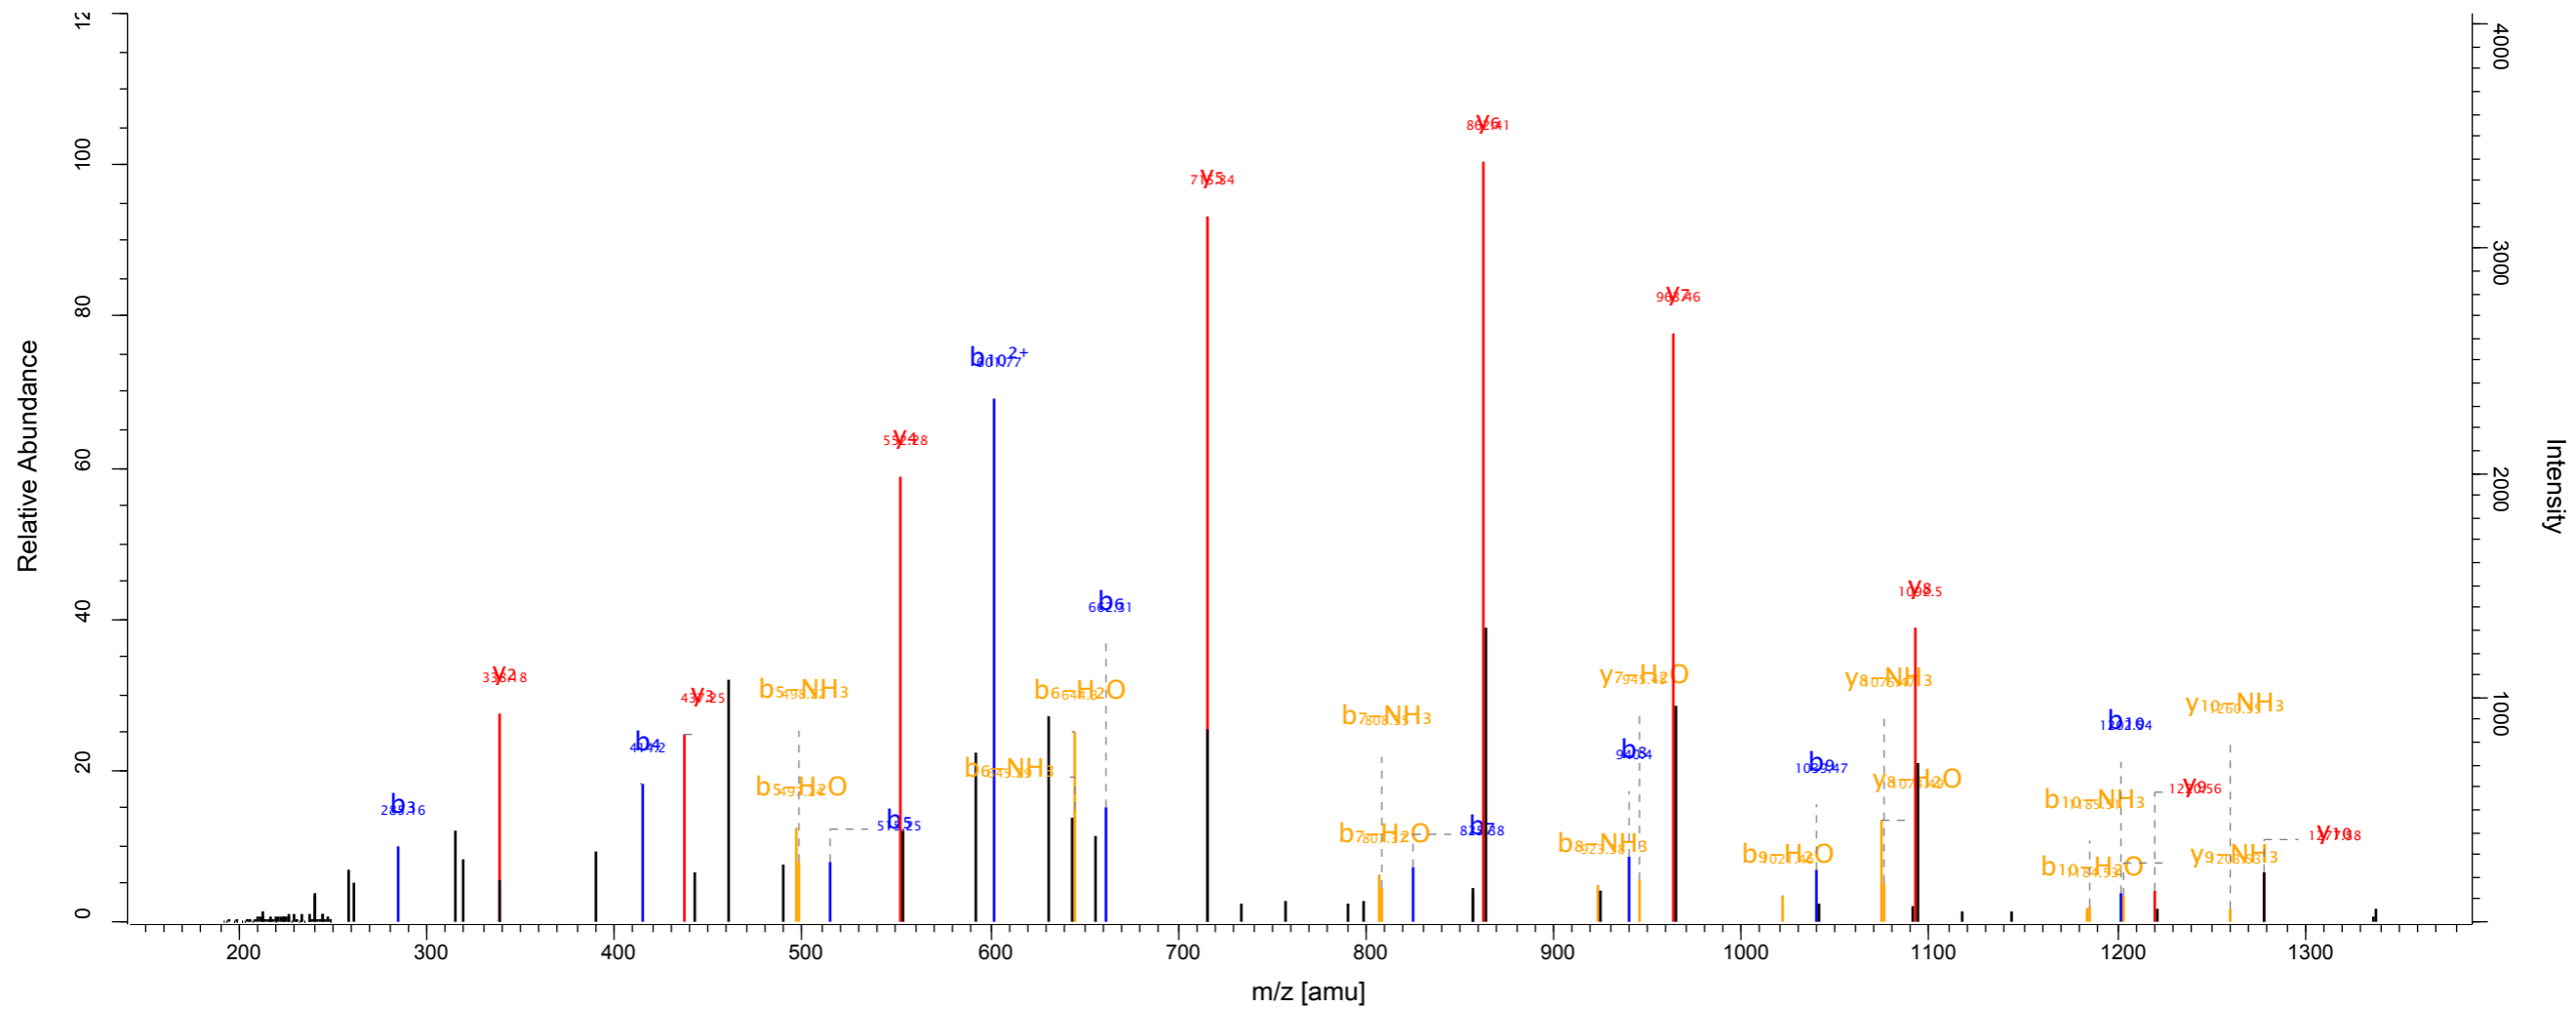

Scan number 3997 Raw file SKaraca\_LMB\_TCE\_Forward\_4\_191011\_rep2  
 Method ITMS; CID Pepti... 215.53

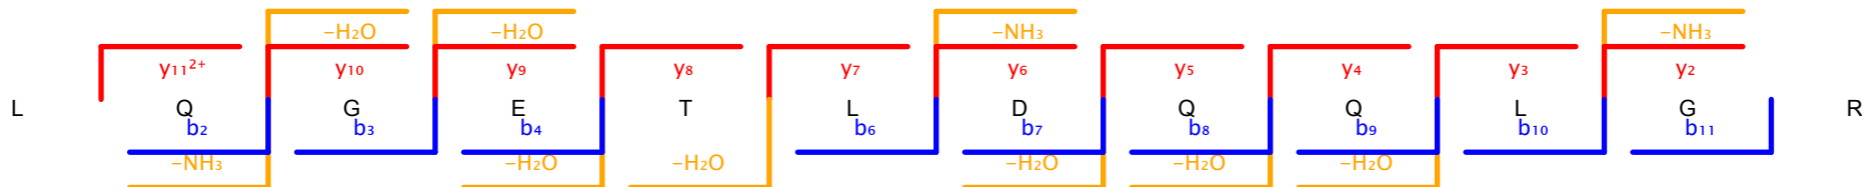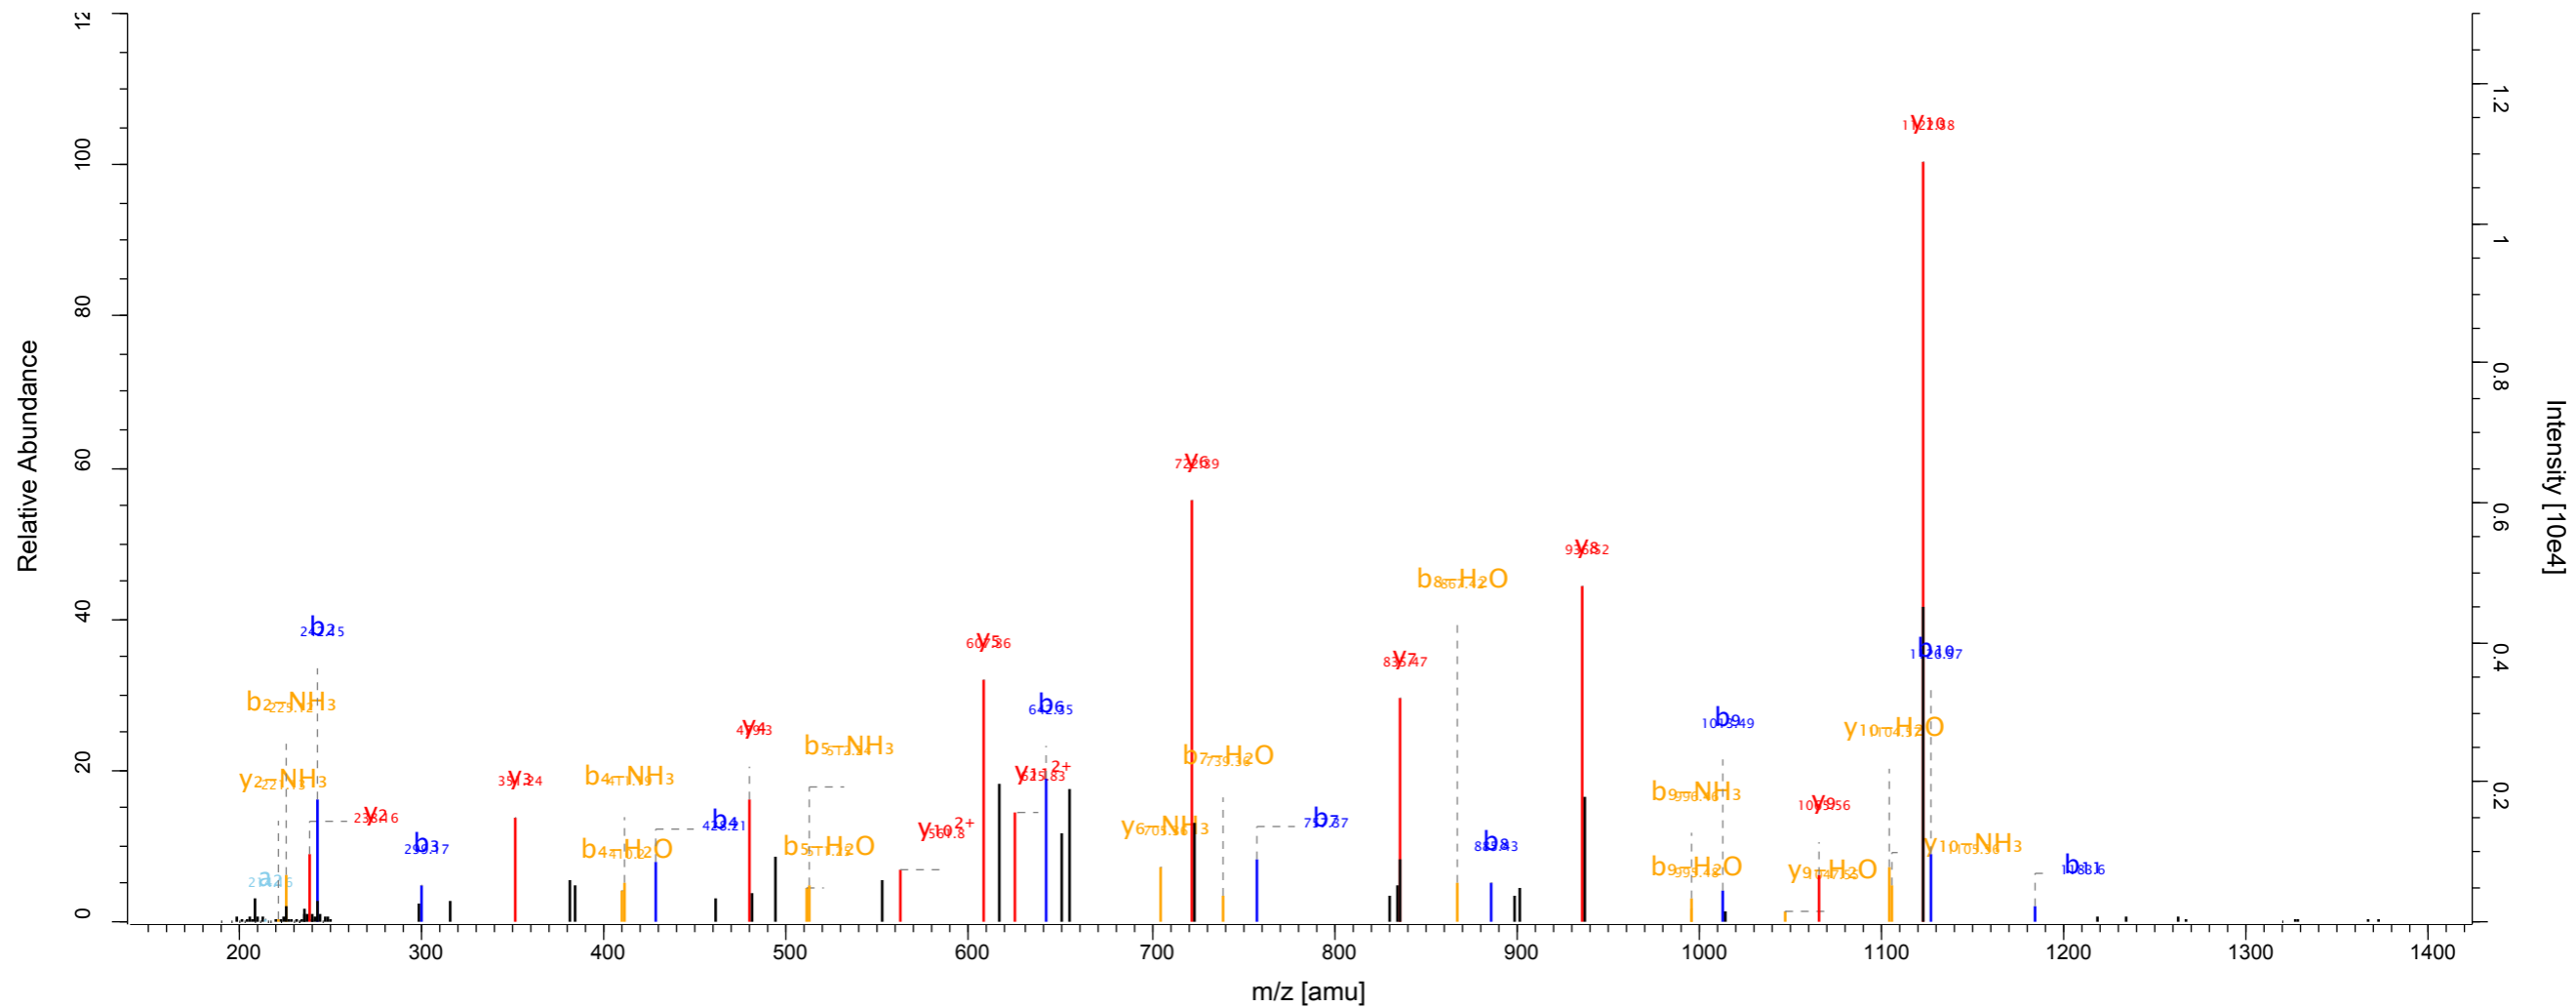

Scan number 2234 Raw file SKaraca\_LMB\_TCE\_Forward\_4\_191011\_rep3  
 Method ITMS; CID Pepti... 230.96

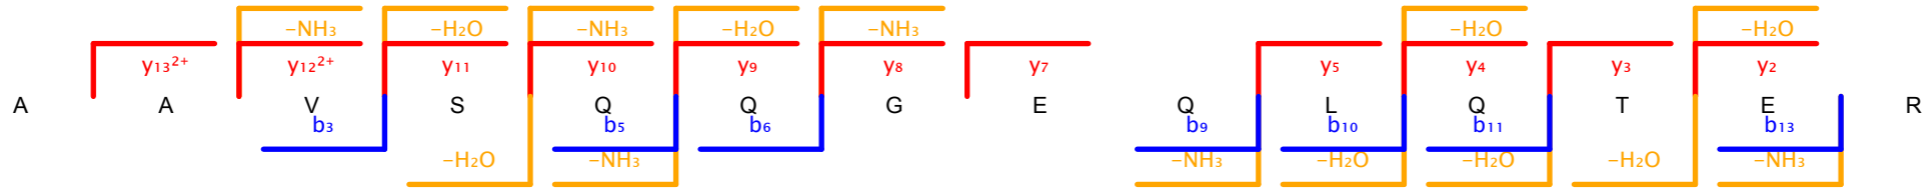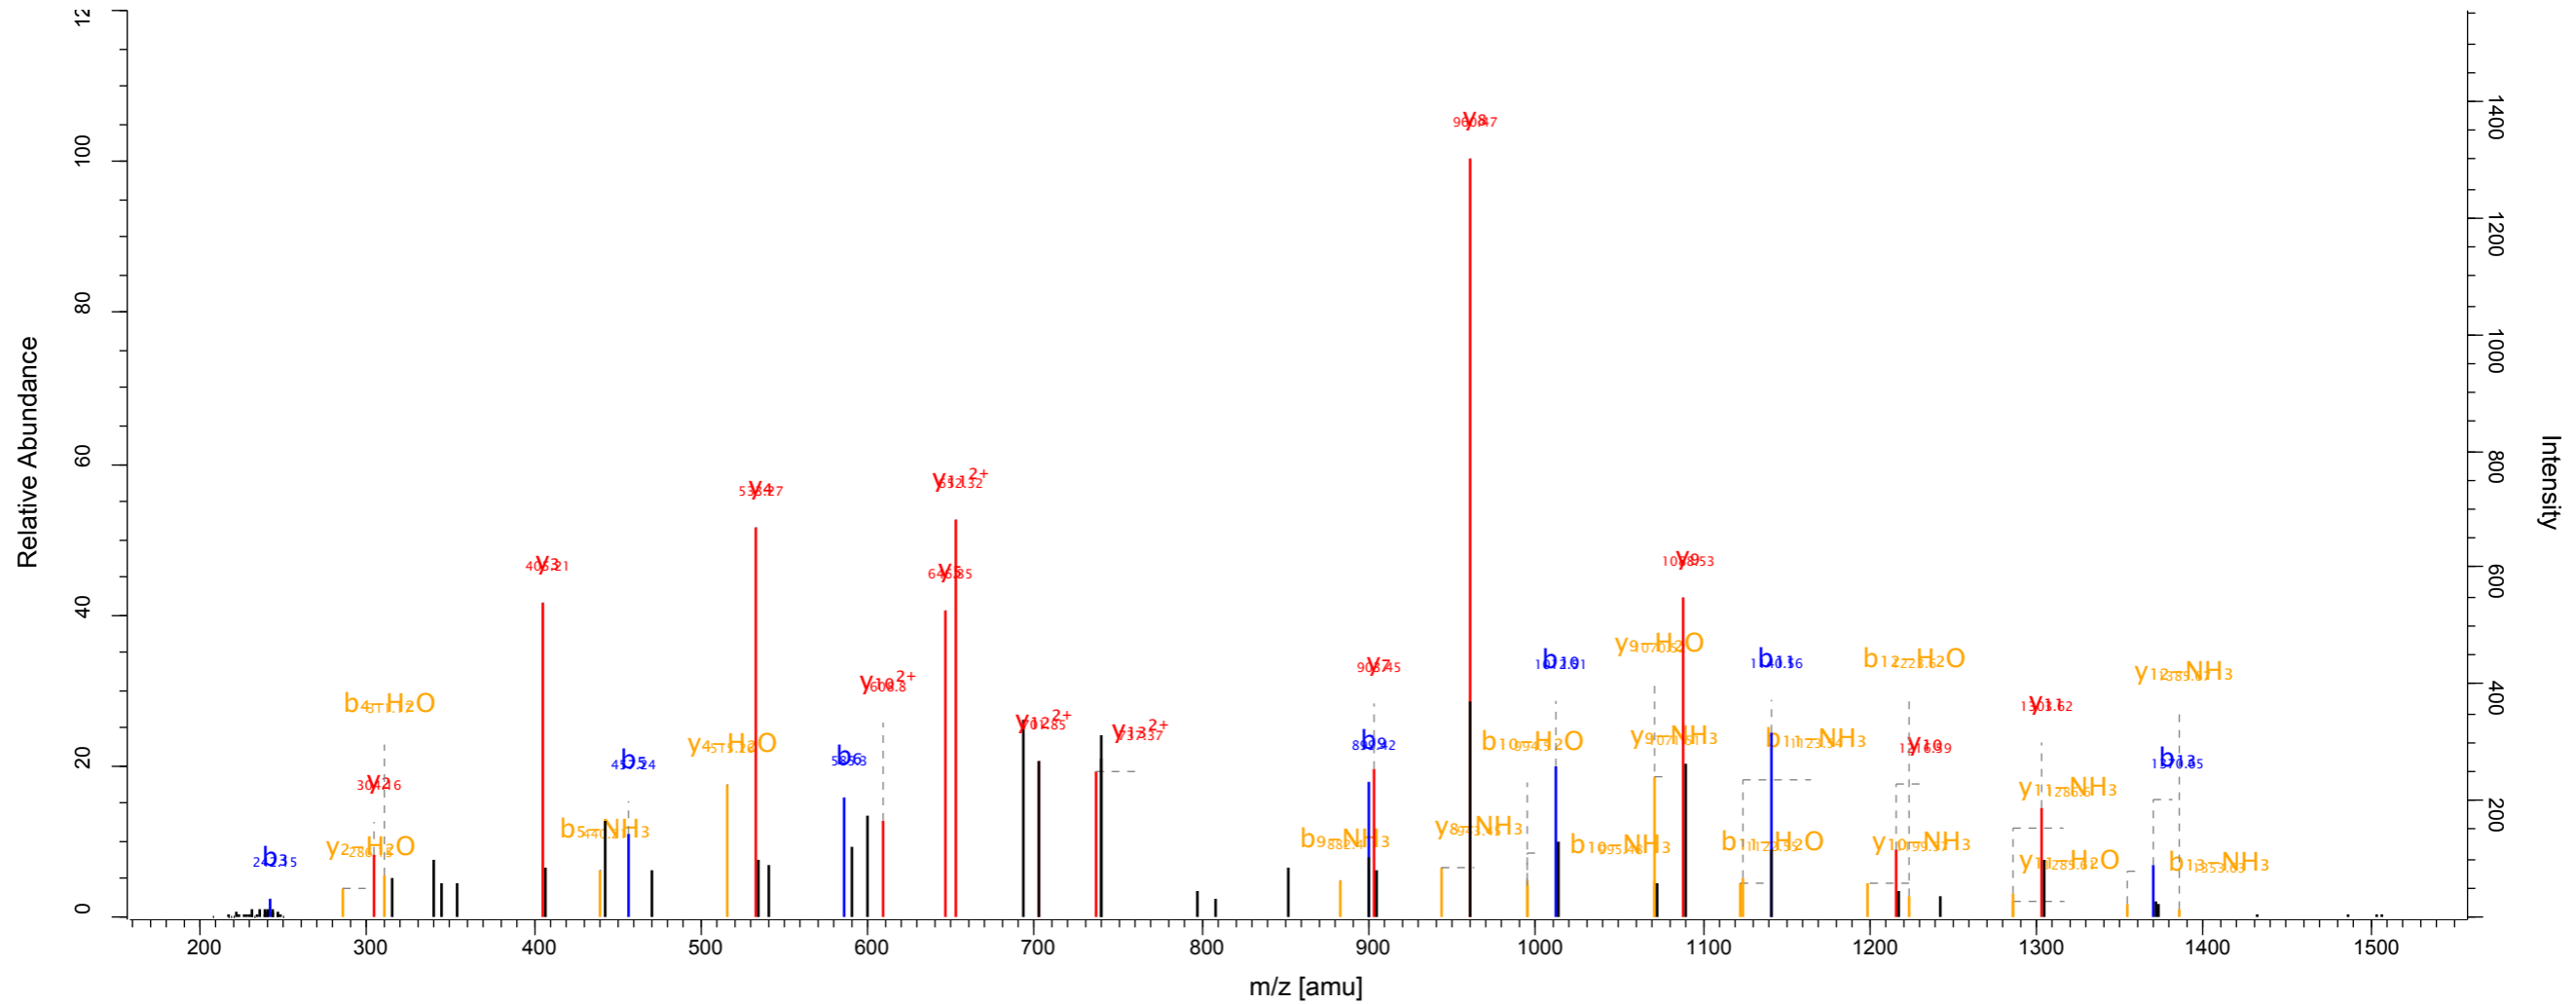



Scan number 7512 Raw file SKaraca\_LMB\_TCE\_Forward\_4\_191011\_rep3  
 Method ITMS; CID Pepti... 138.24

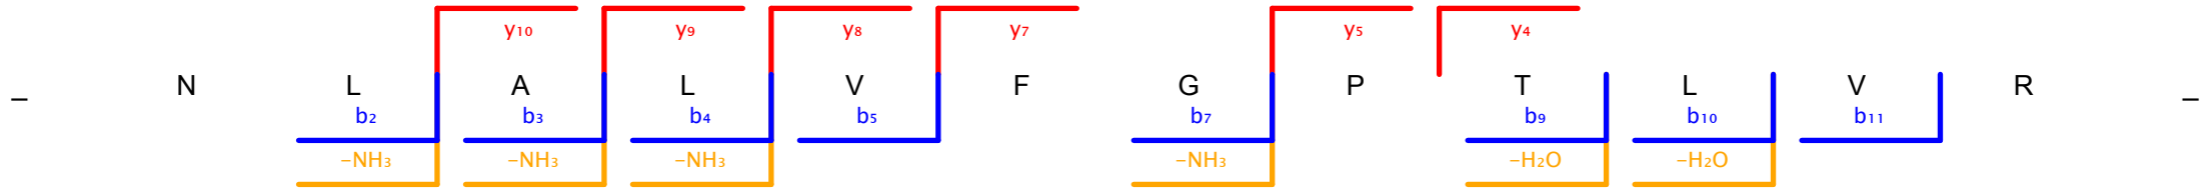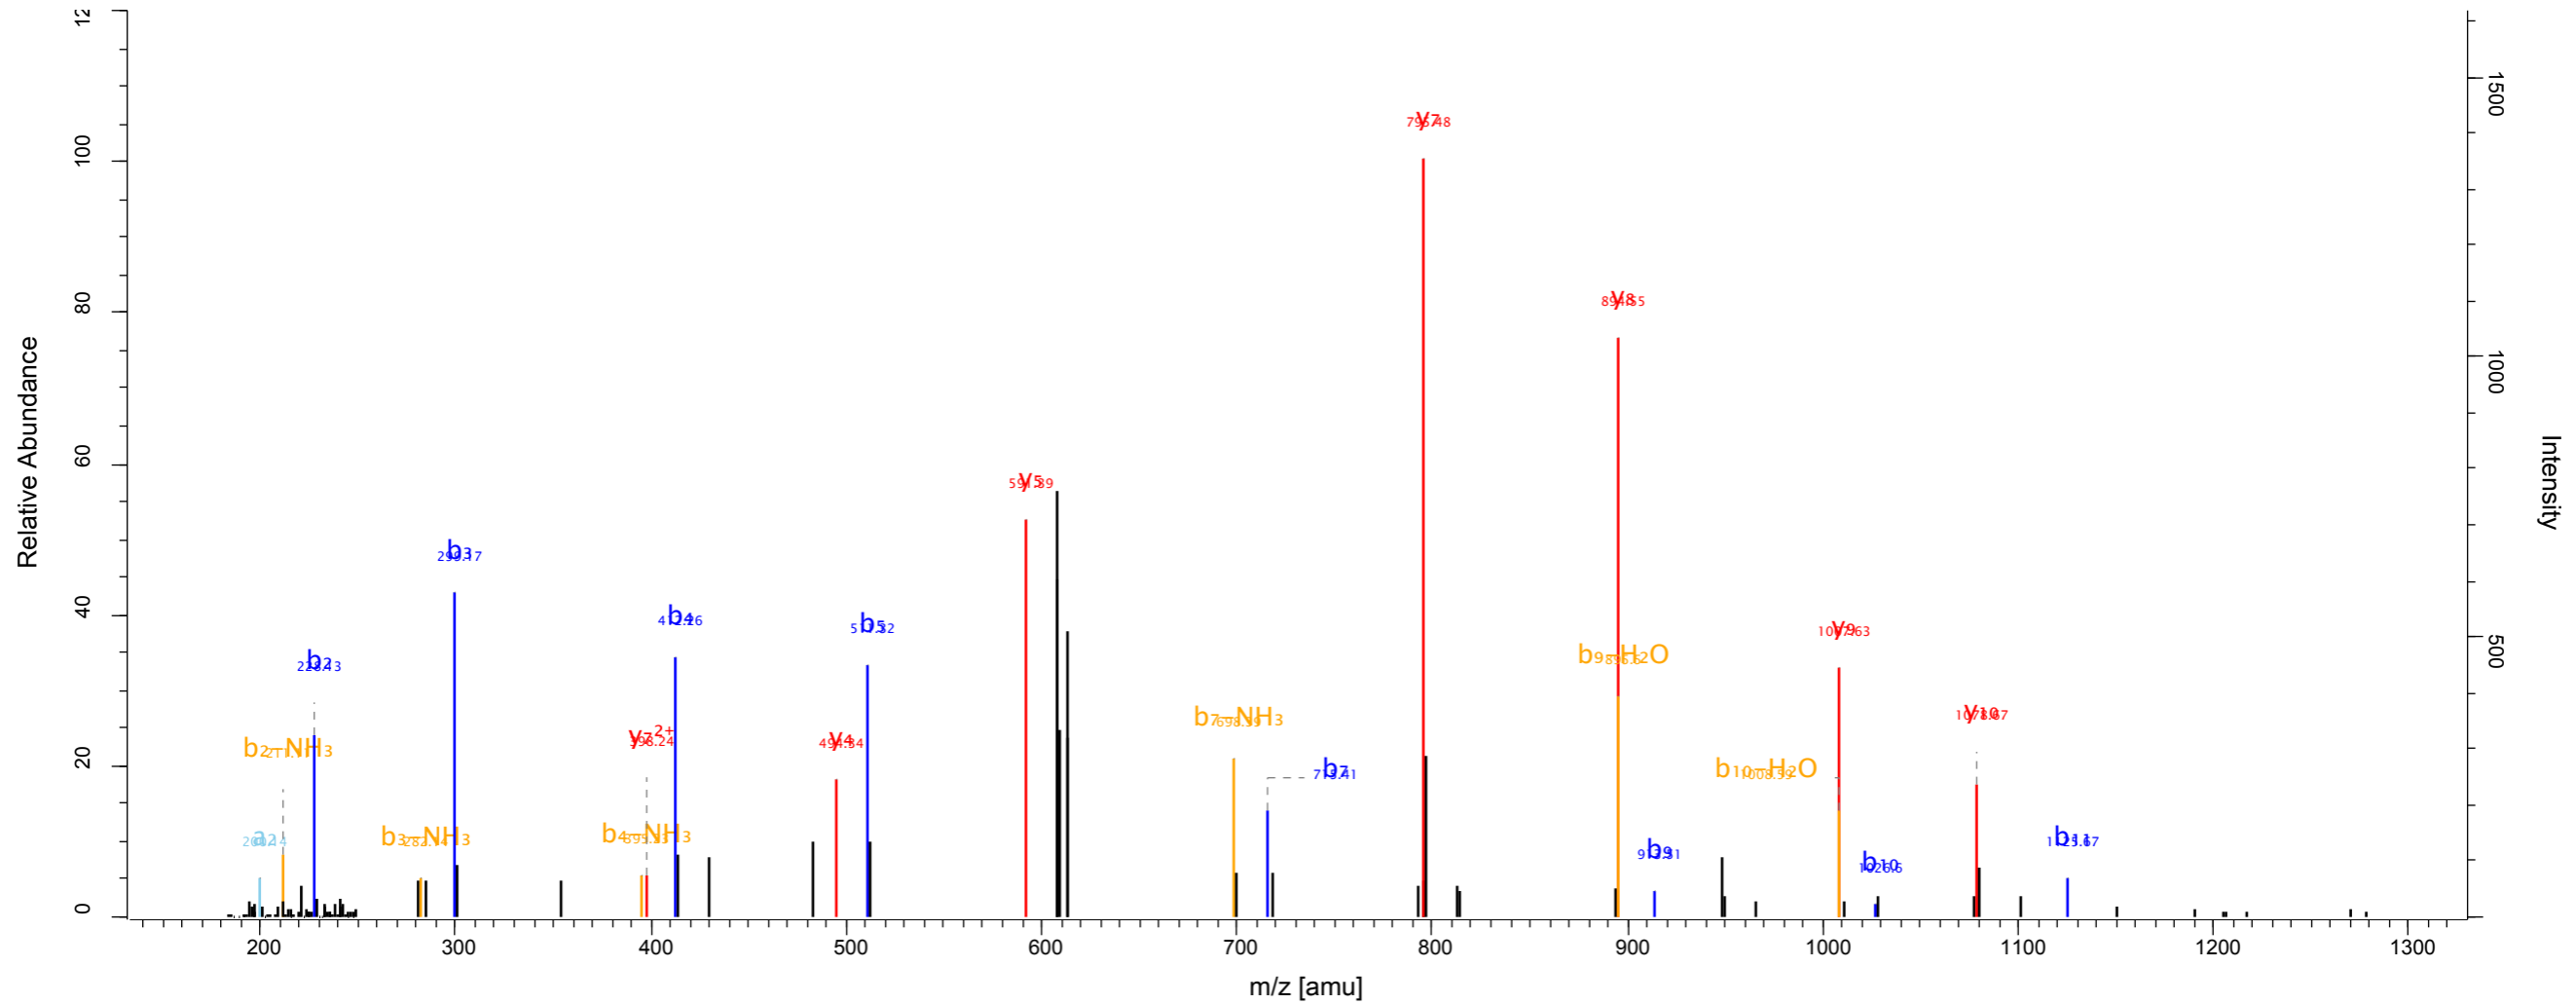

Scan number 1126 Raw file SKaraca\_LMB\_TCE\_Forward\_5\_191011\_rep1  
 Method ITMS; CID Pepti... 140.78

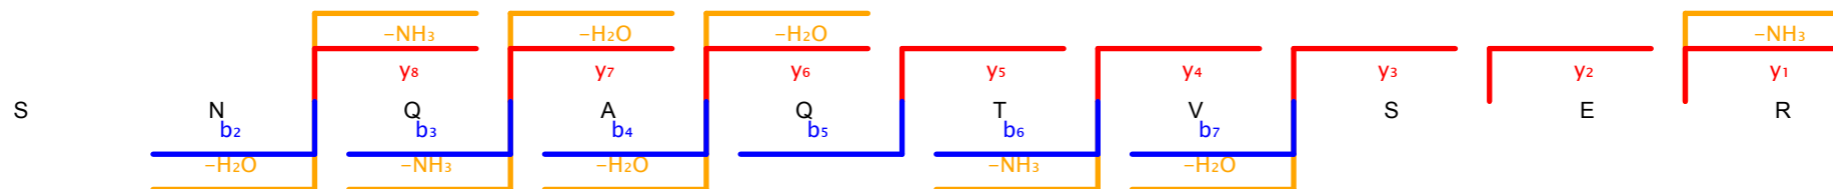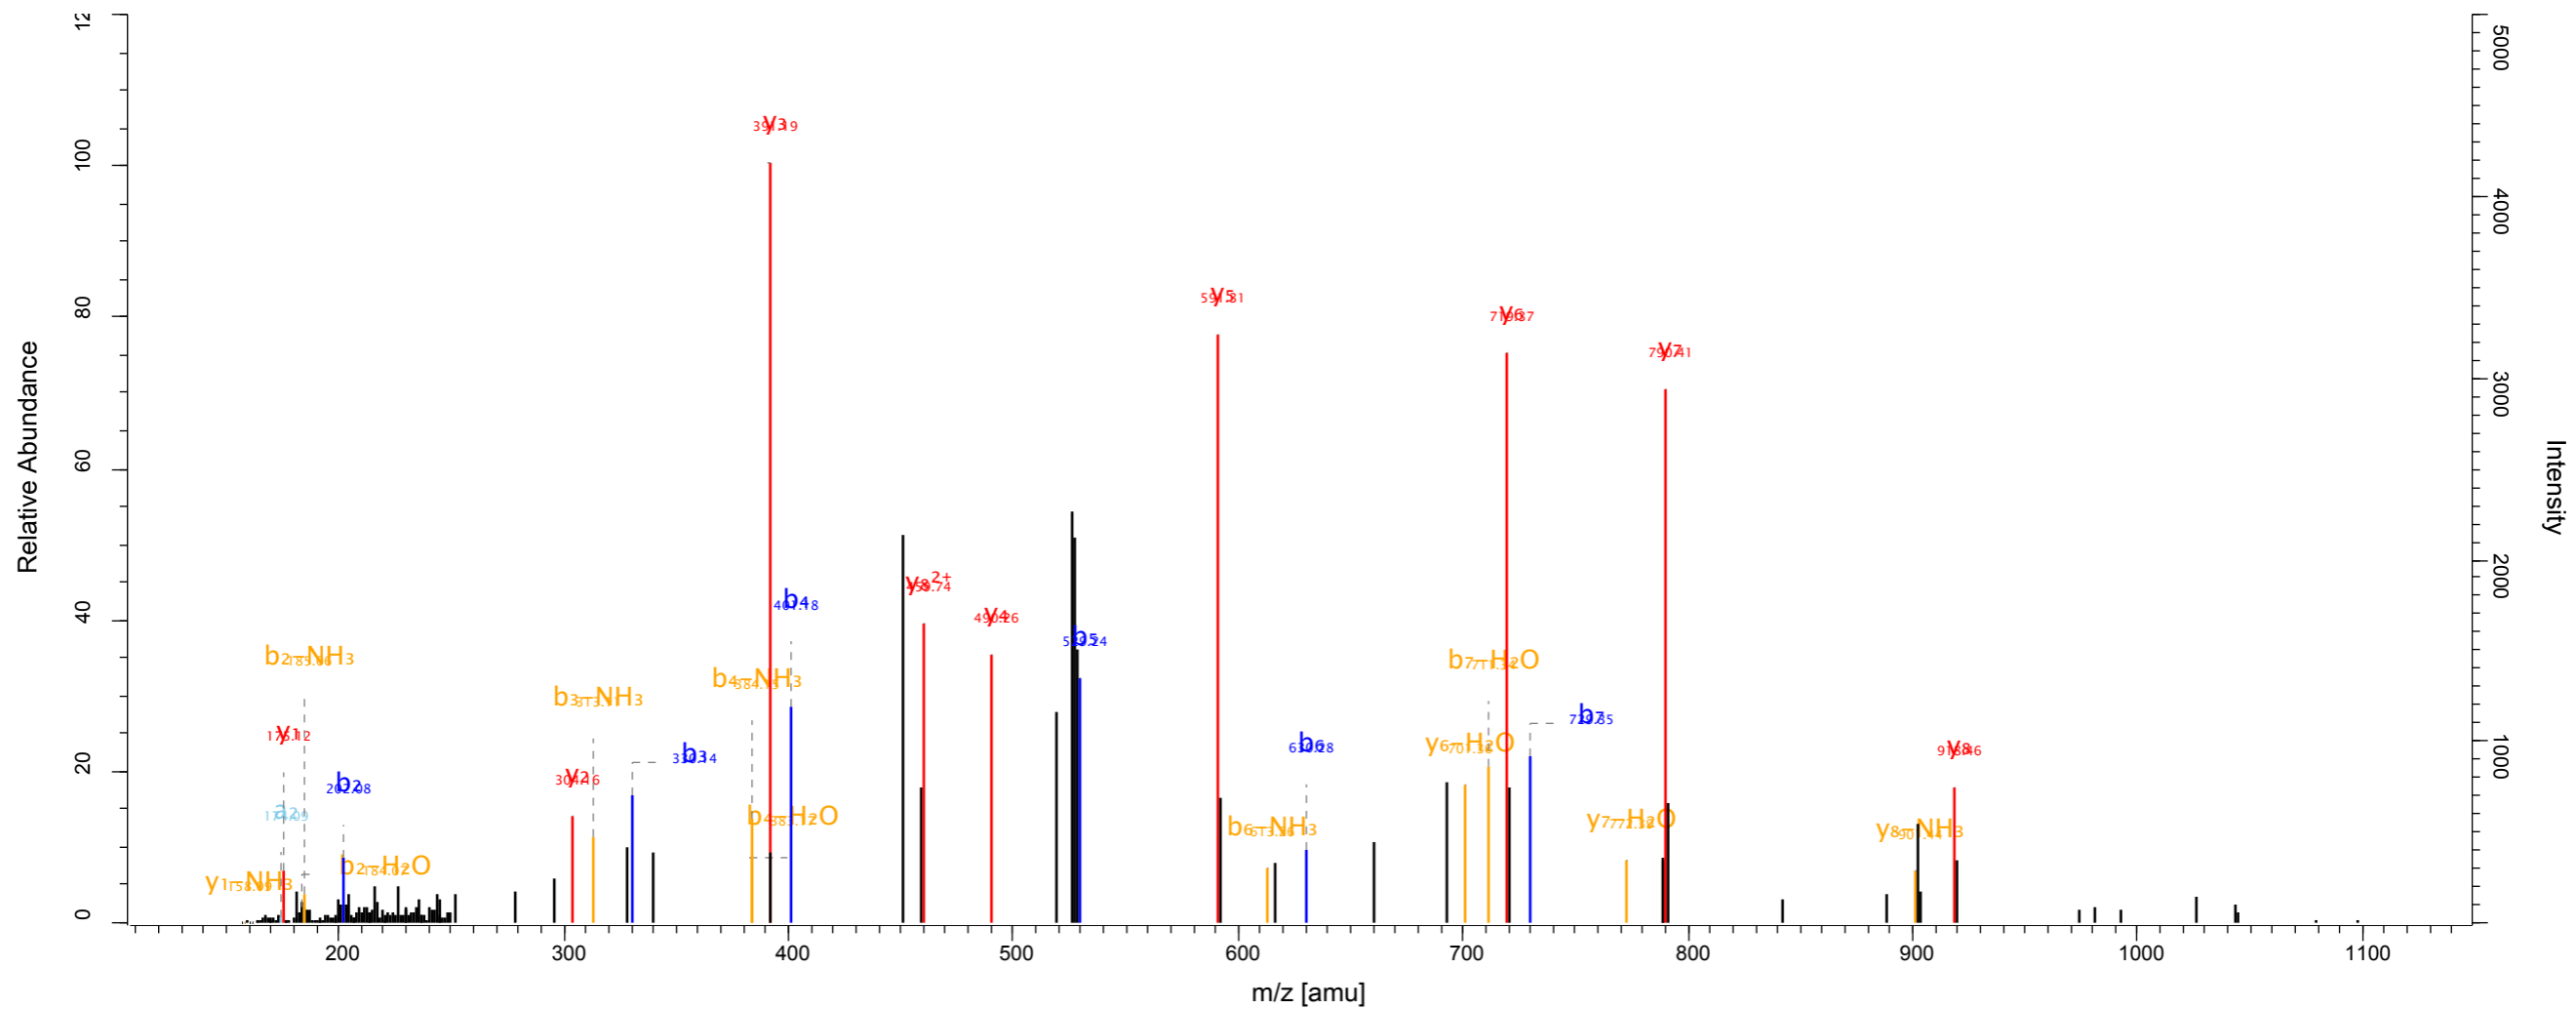

Scan number 4149 Raw file SKaraca\_LMB\_TCE\_Forward\_5\_191011\_rep1  
 Method ITMS; CID Pepti... 146.96

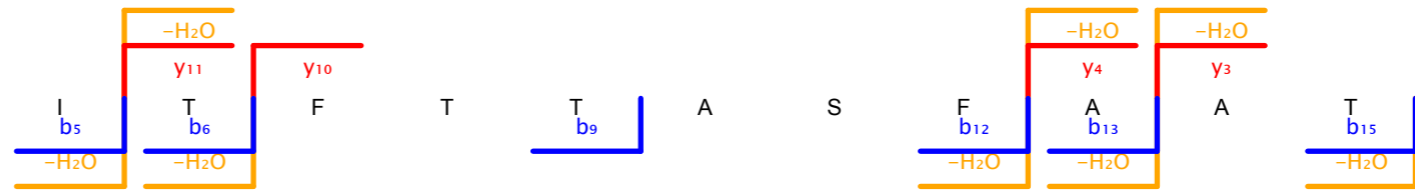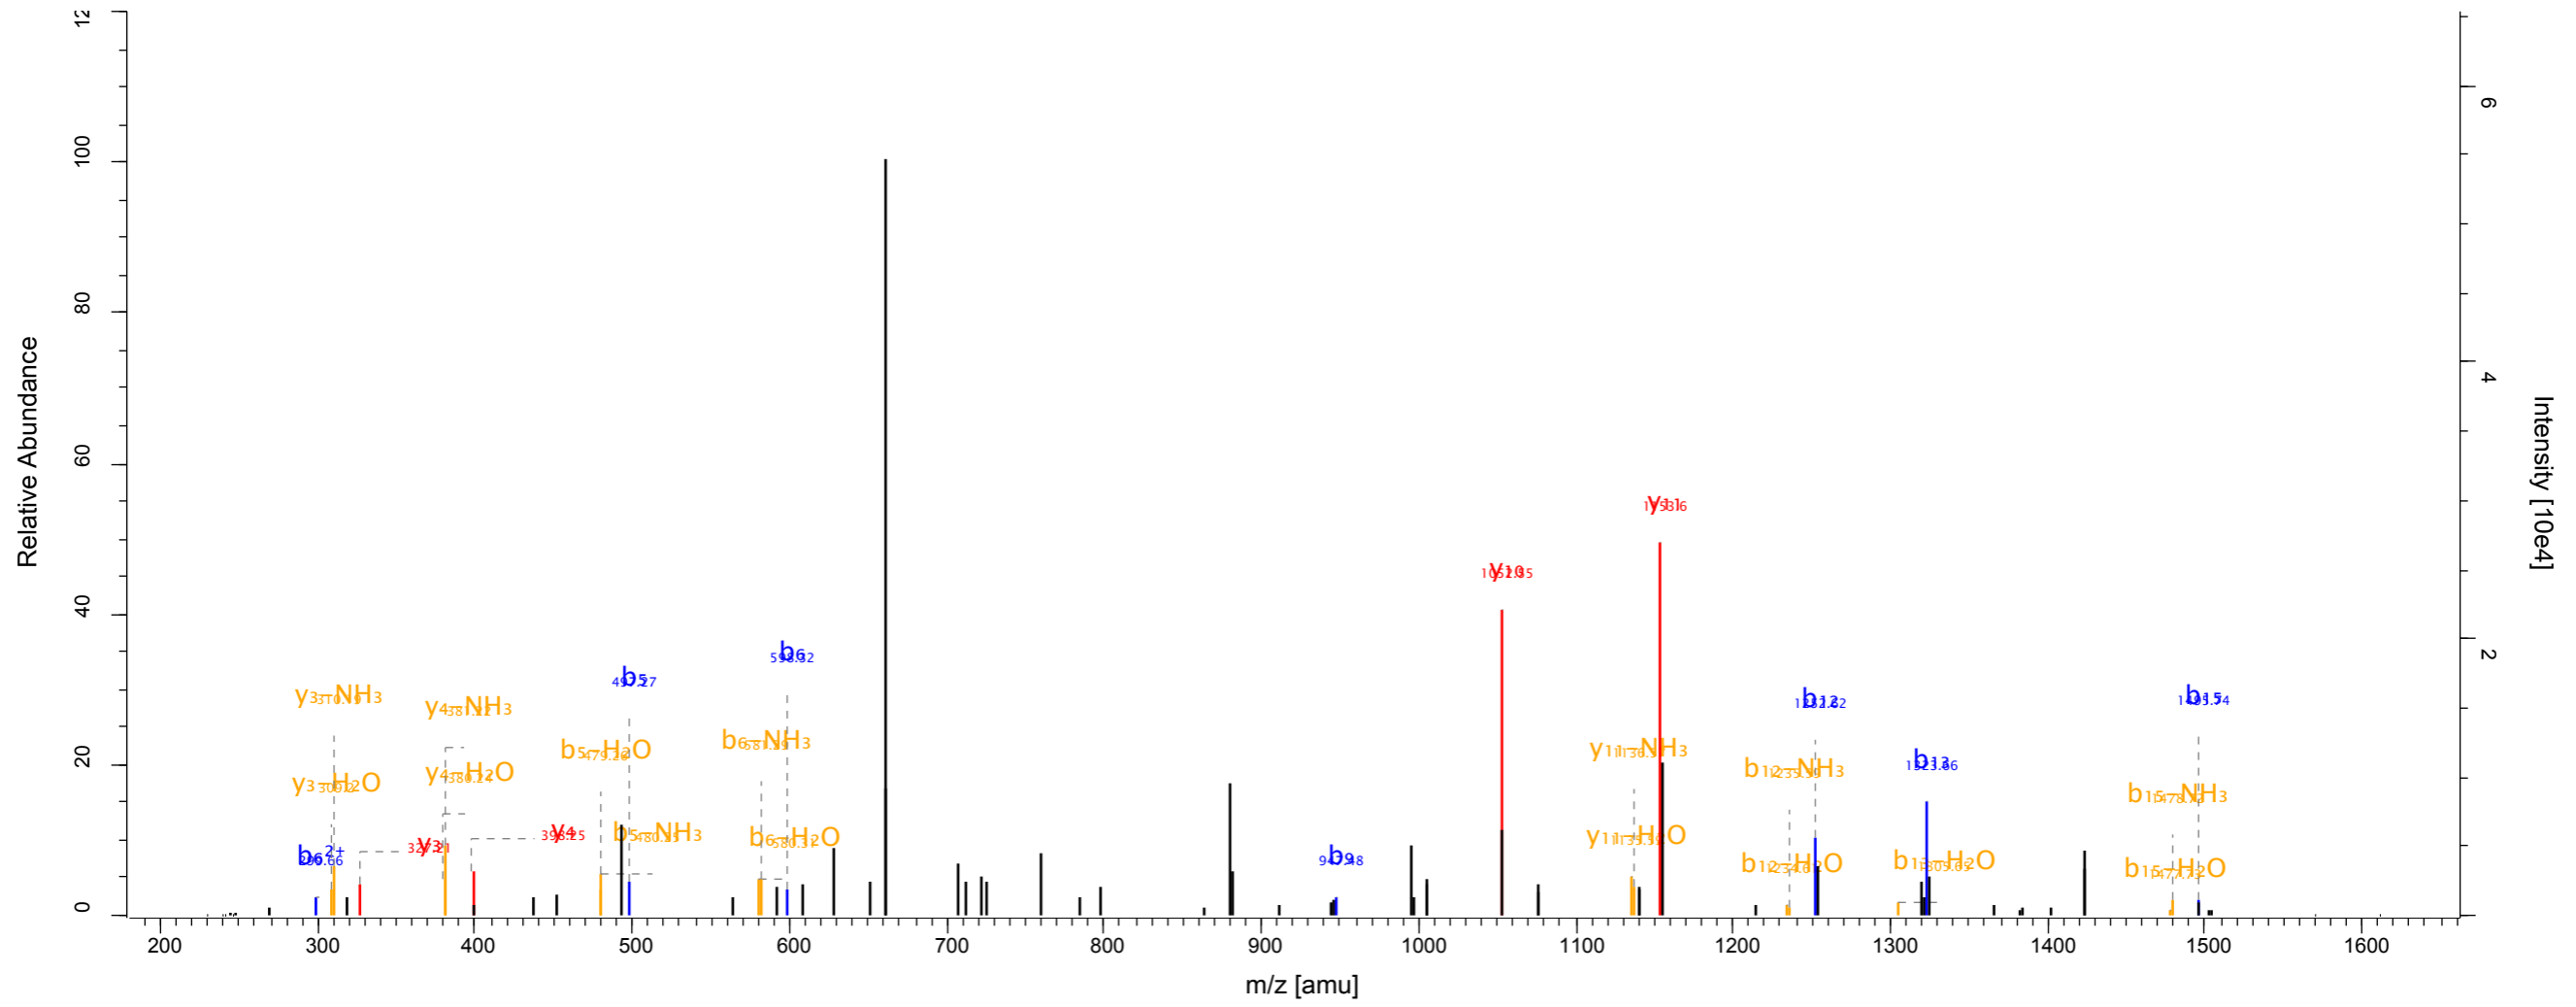

Scan number 7688 Raw file SKaraca\_LMB\_TCE\_Forward\_5\_191011\_rep1  
 Method ITMS; CID Pepti... 142.57

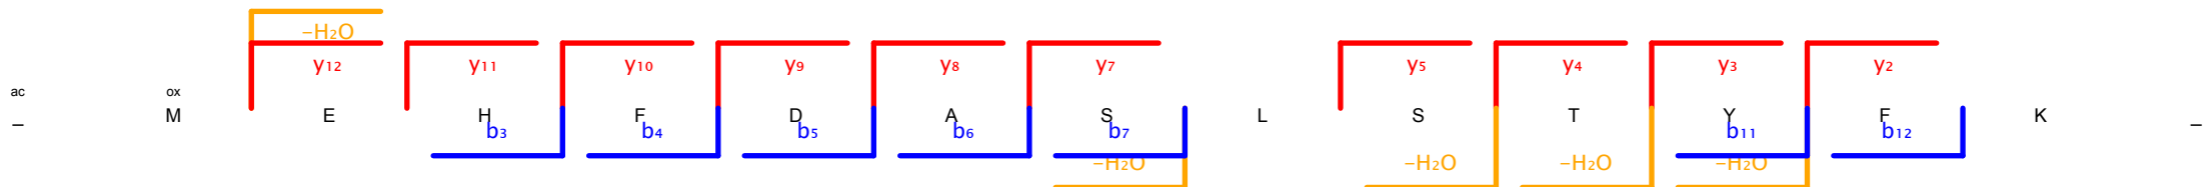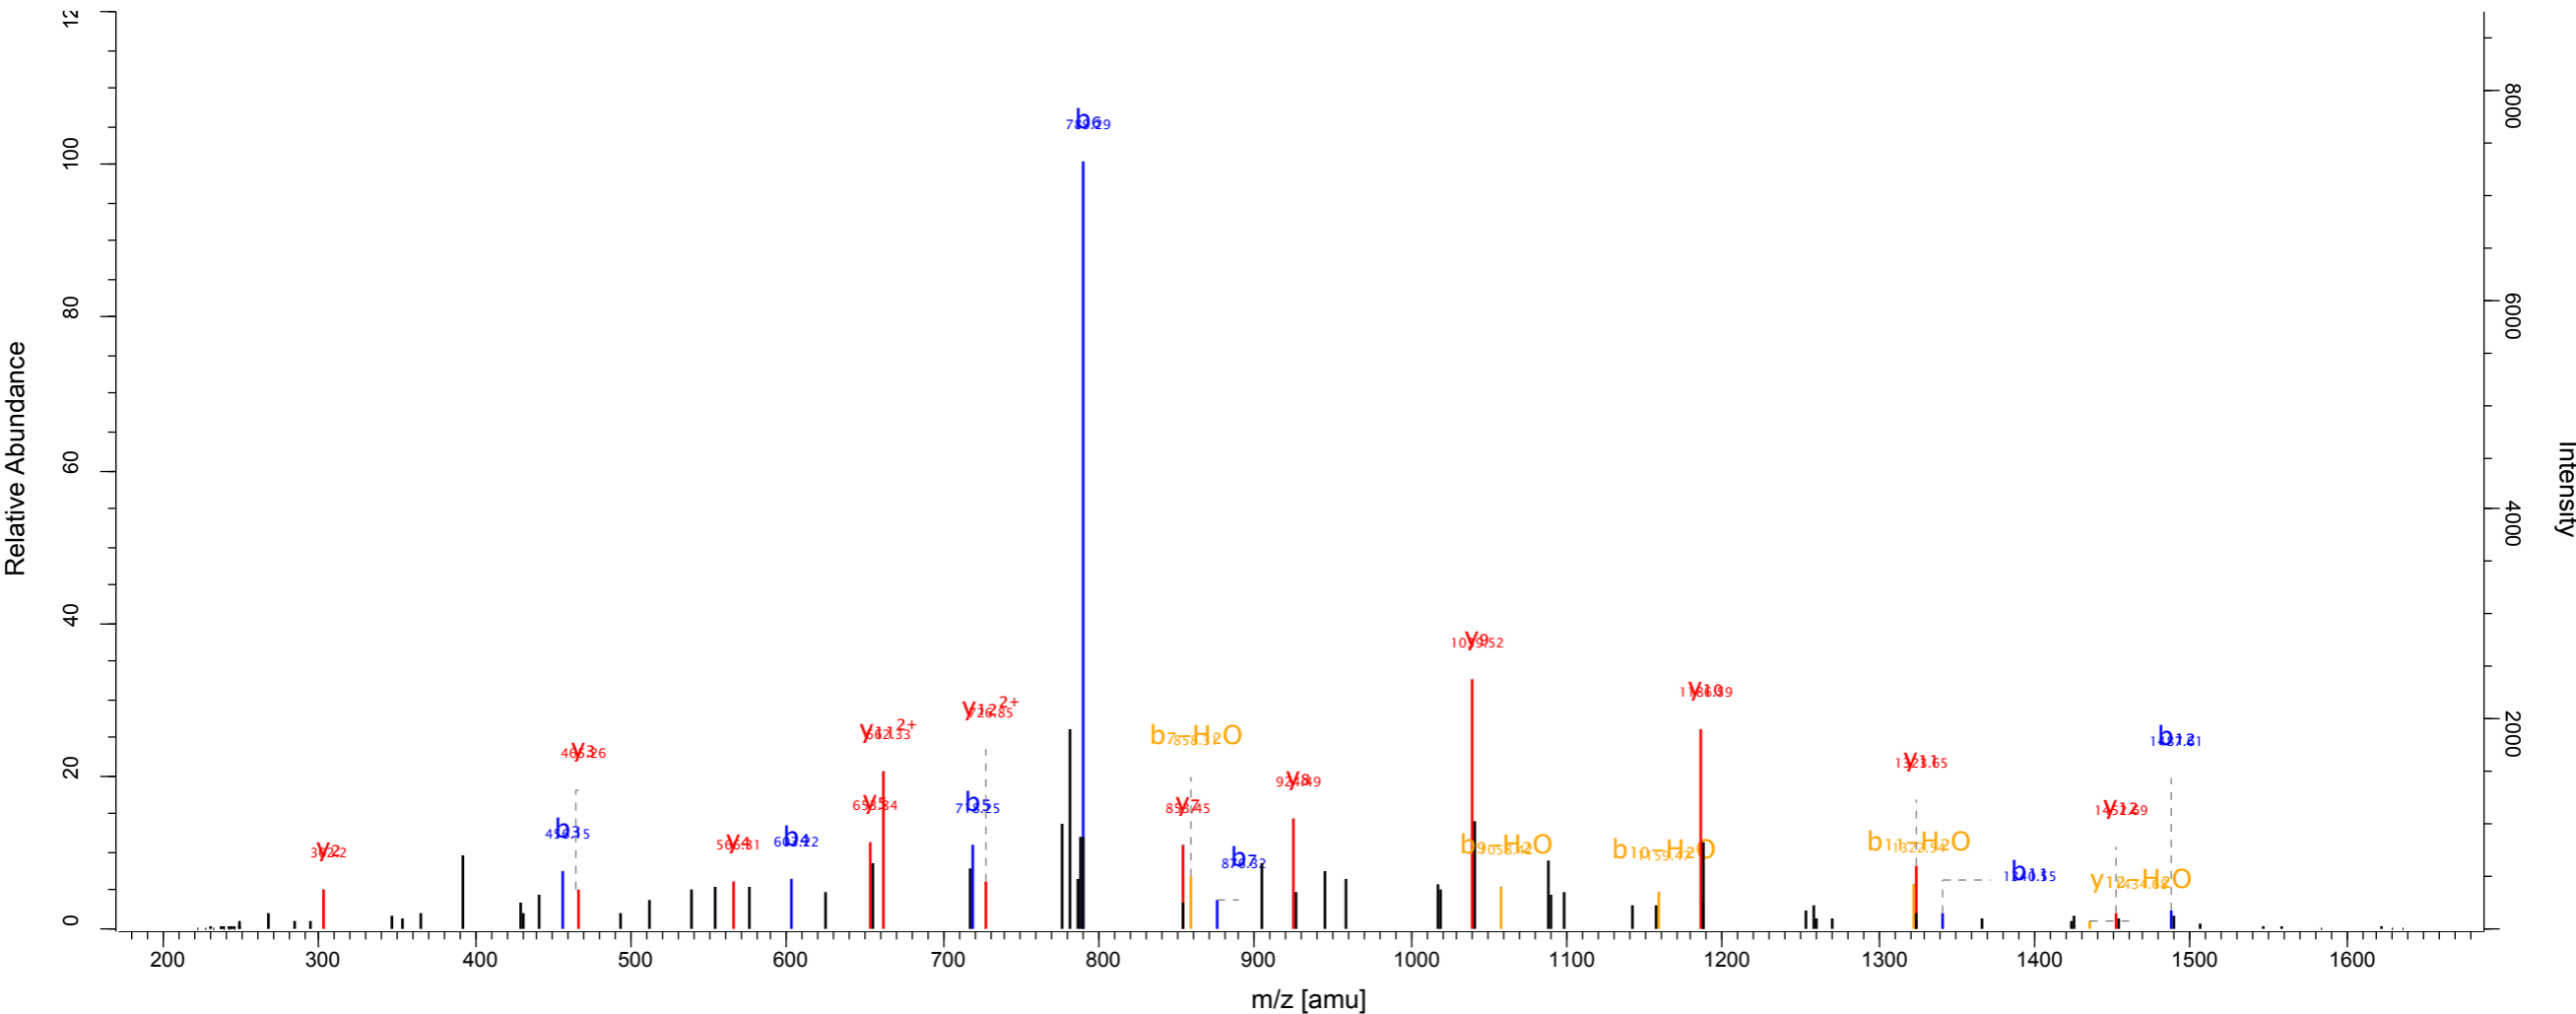

|             |           |          |                                       |
|-------------|-----------|----------|---------------------------------------|
| Scan number | 8563      | Raw file | SKaraca_LMB_TCE_Forward_5_191011_rep1 |
| Method      | ITMS; CID | Pepti... | 129.89                                |

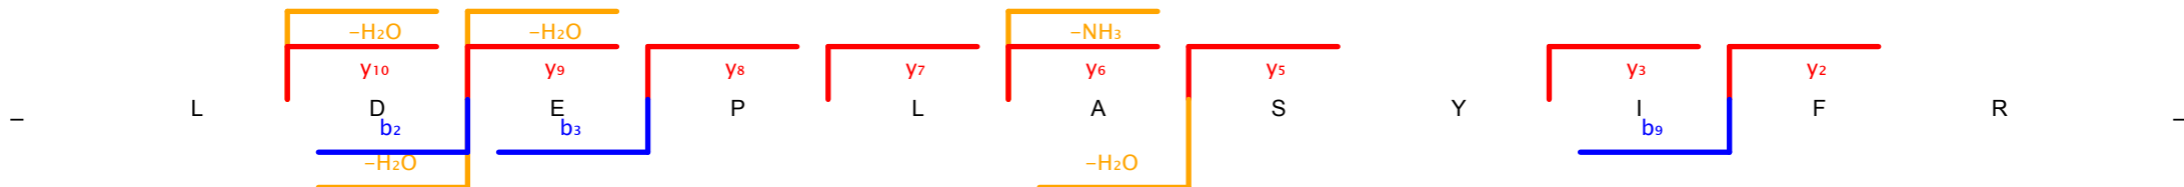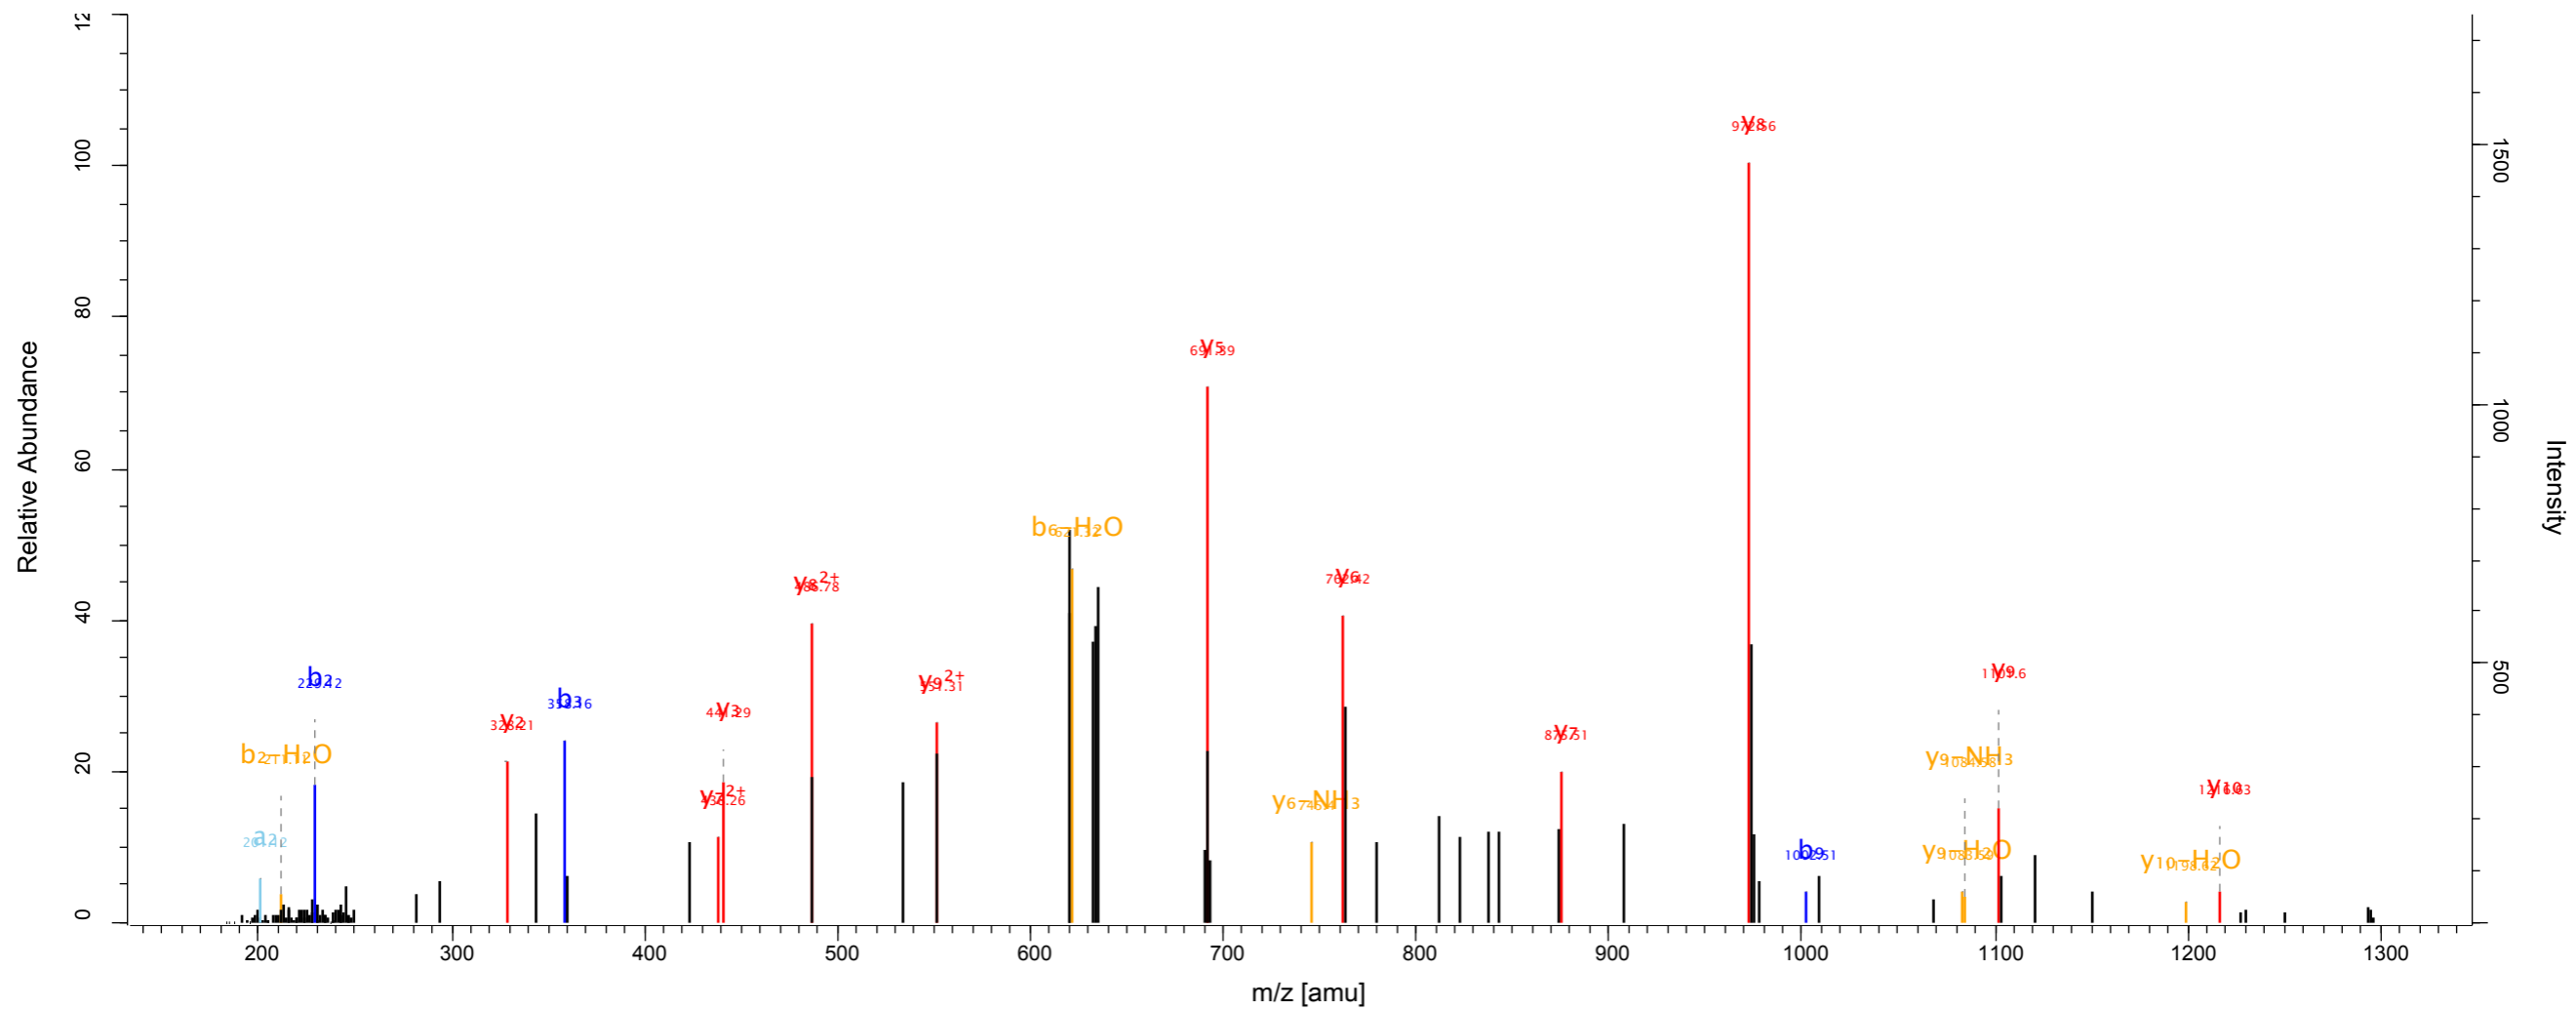

Scan number 4776 Raw file SKaraca\_LMB\_TCE\_Forward\_5\_191011\_rep2  
 Method ITMS; CID Pepti... 104.43

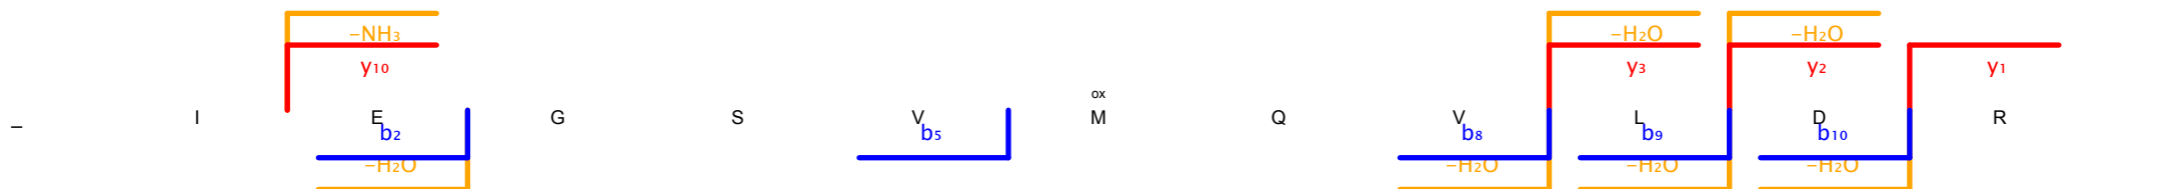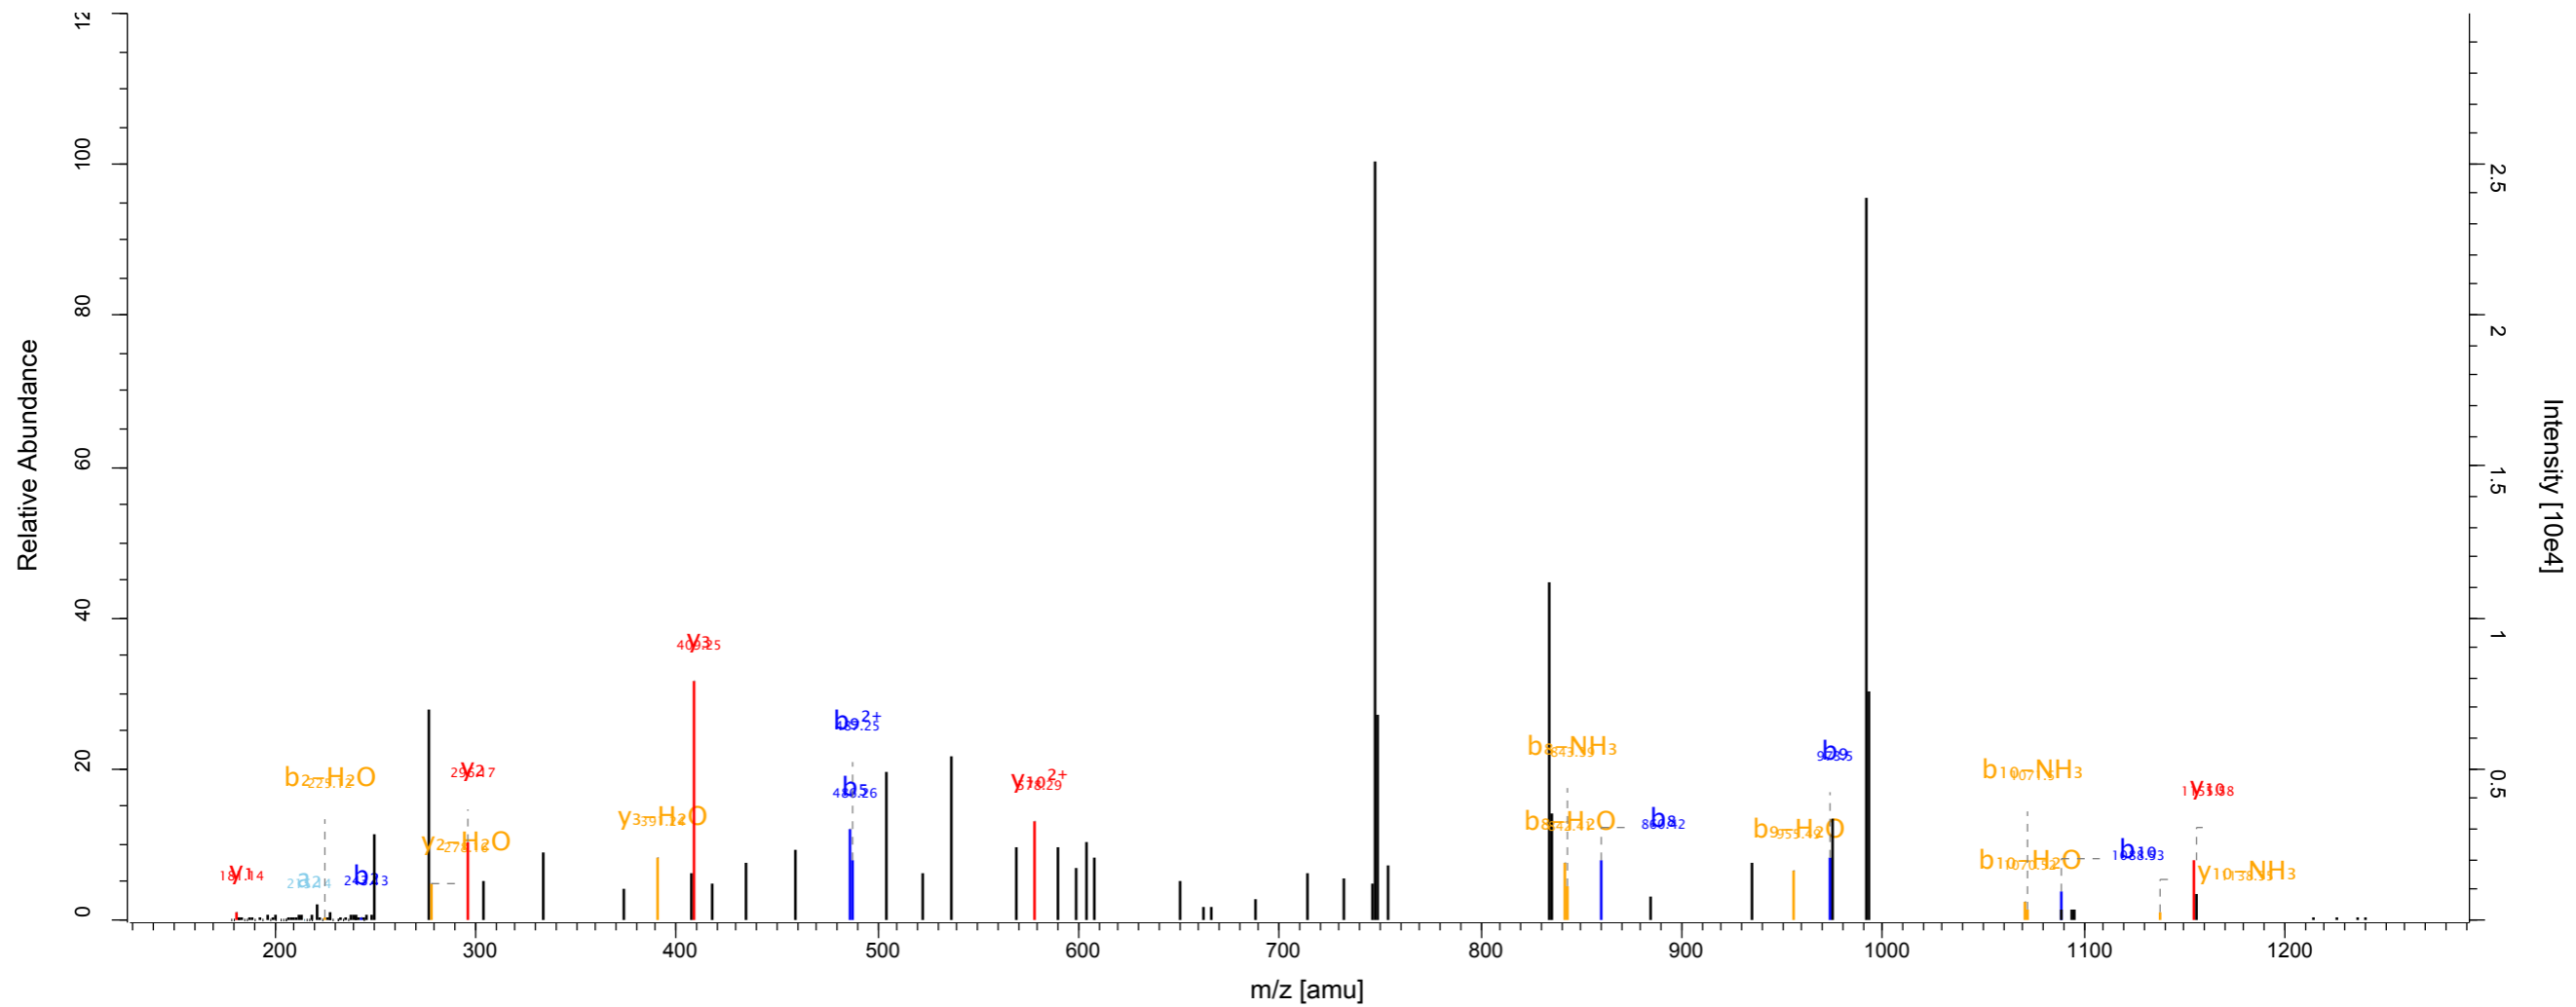

Scan number 8448 Raw file SKaraca\_LMB\_TCE\_Forward\_5\_191011\_rep2  
 Method ITMS; CID Pepti... 174.59

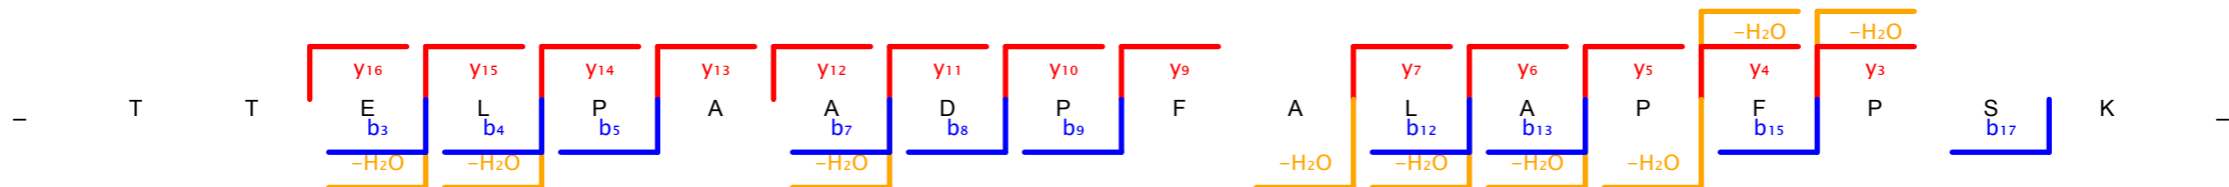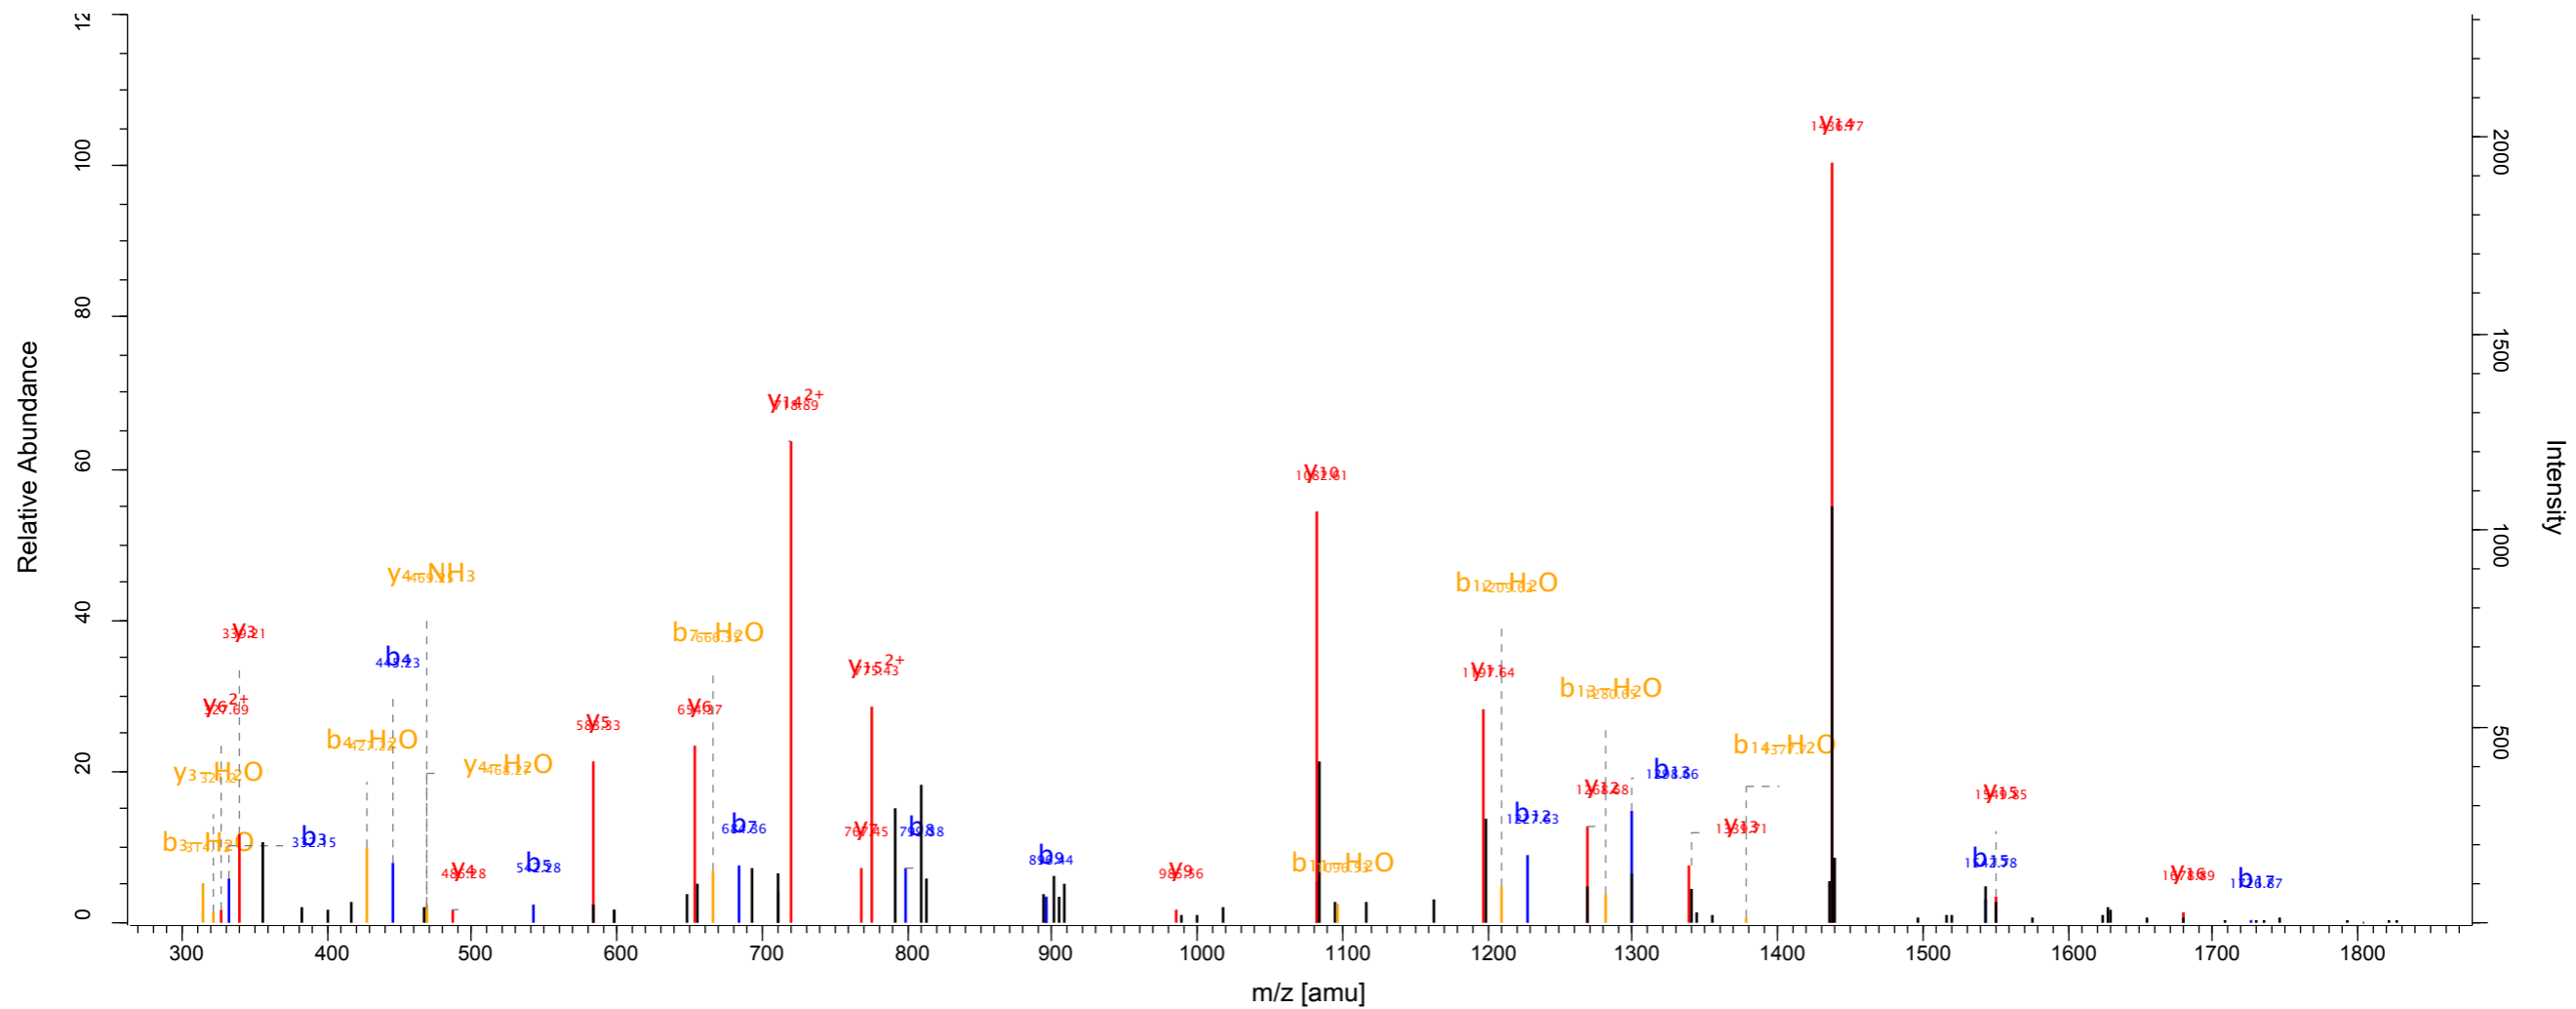

Scan number 4855 Raw file SKaraca\_LMB\_TCE\_Forward\_6\_191011\_rep1  
 Method ITMS; CID Pepti... 130.66

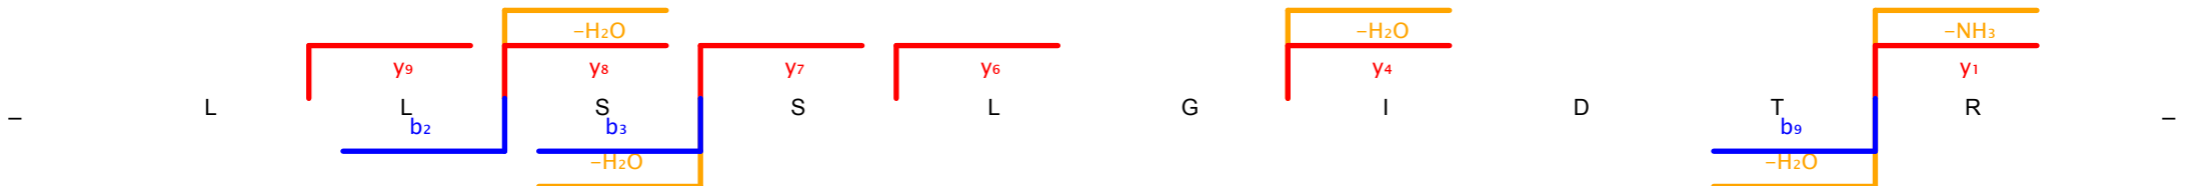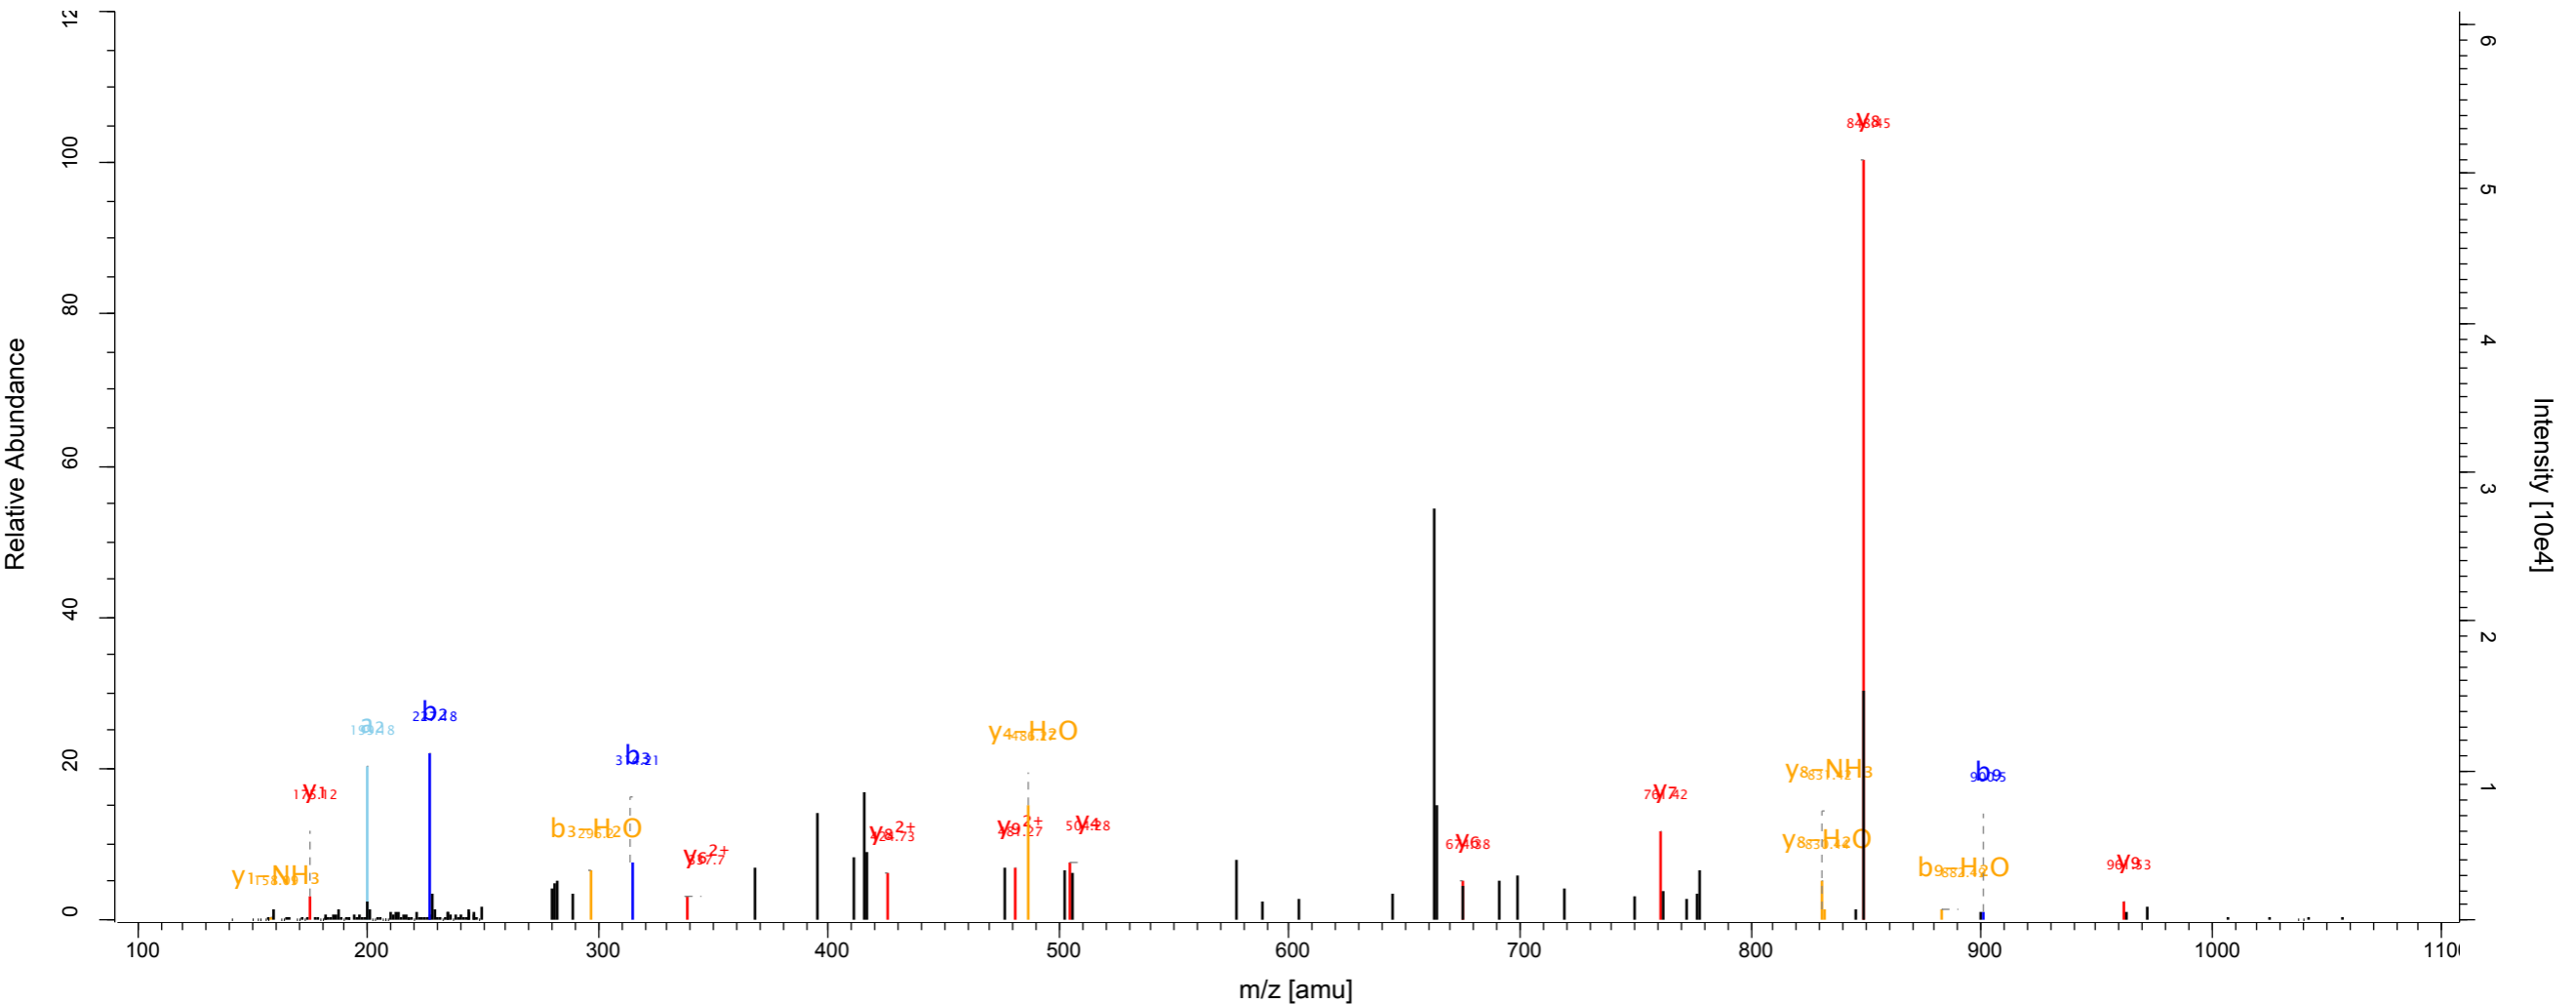



Scan number 7443 Raw file SKaraca\_LMB\_TCE\_Forward\_6\_191011\_rep1  
 Method ITMS; CID Pepti... 119.74

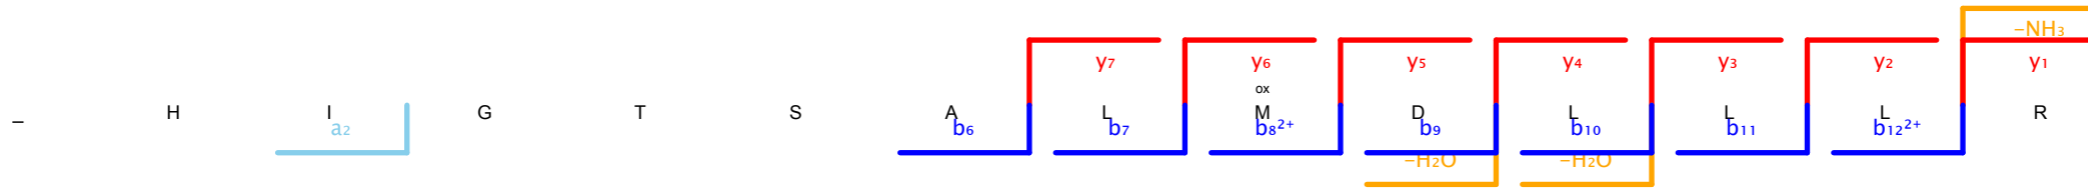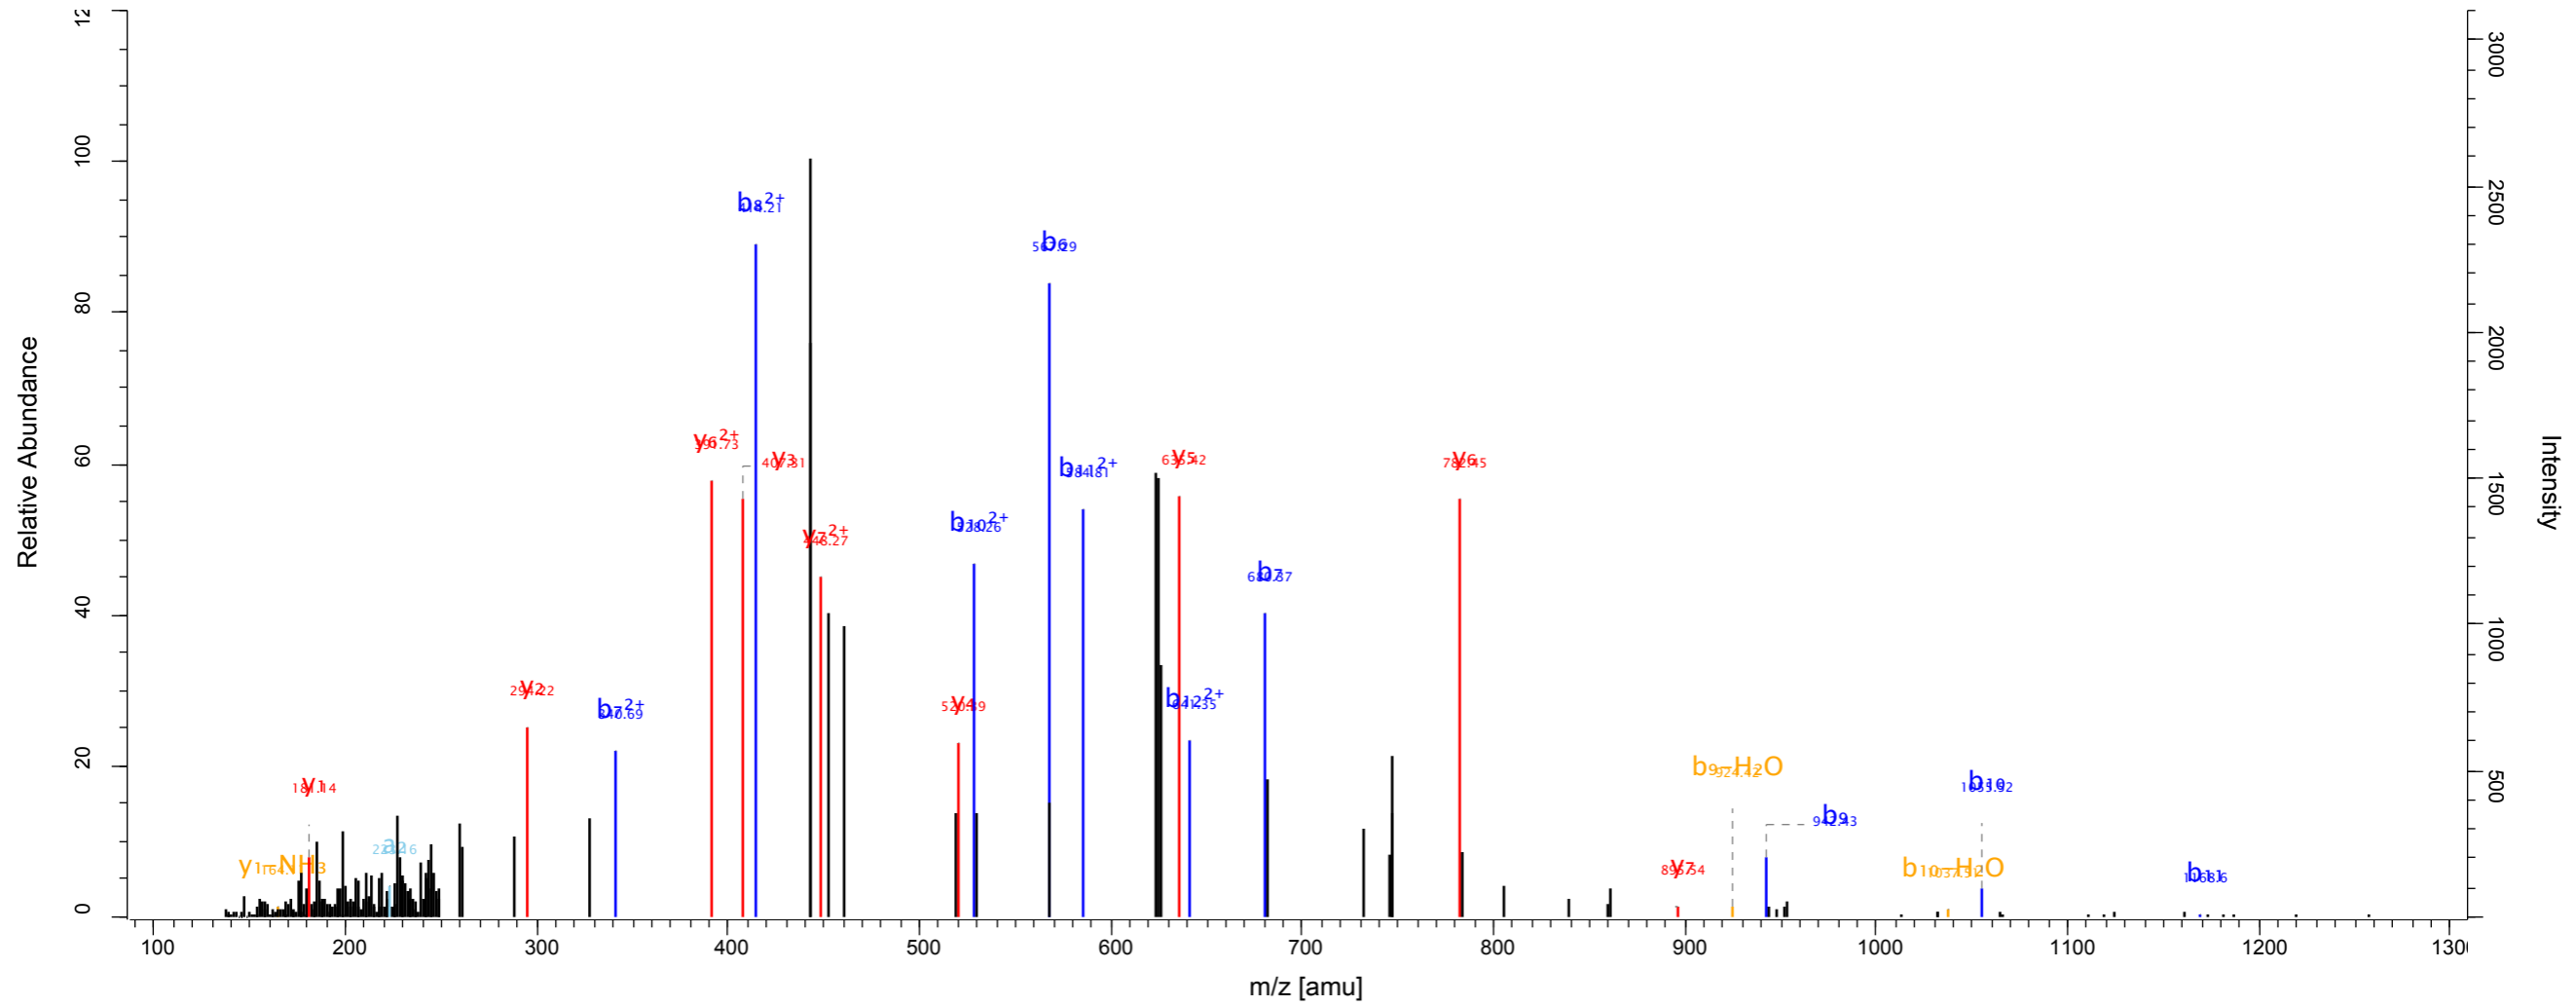

Scan number 9245 Raw file SKaraca\_LMB\_TCE\_Forward\_6\_191011\_rep1  
 Method ITMS; CID Pepti... 141.58

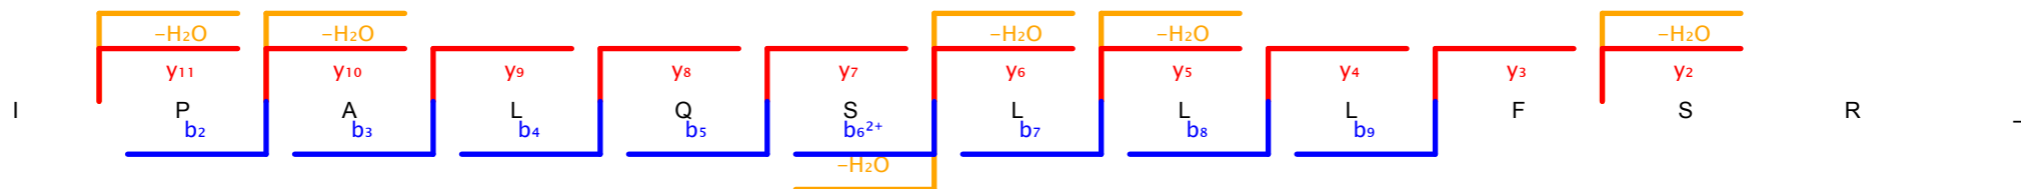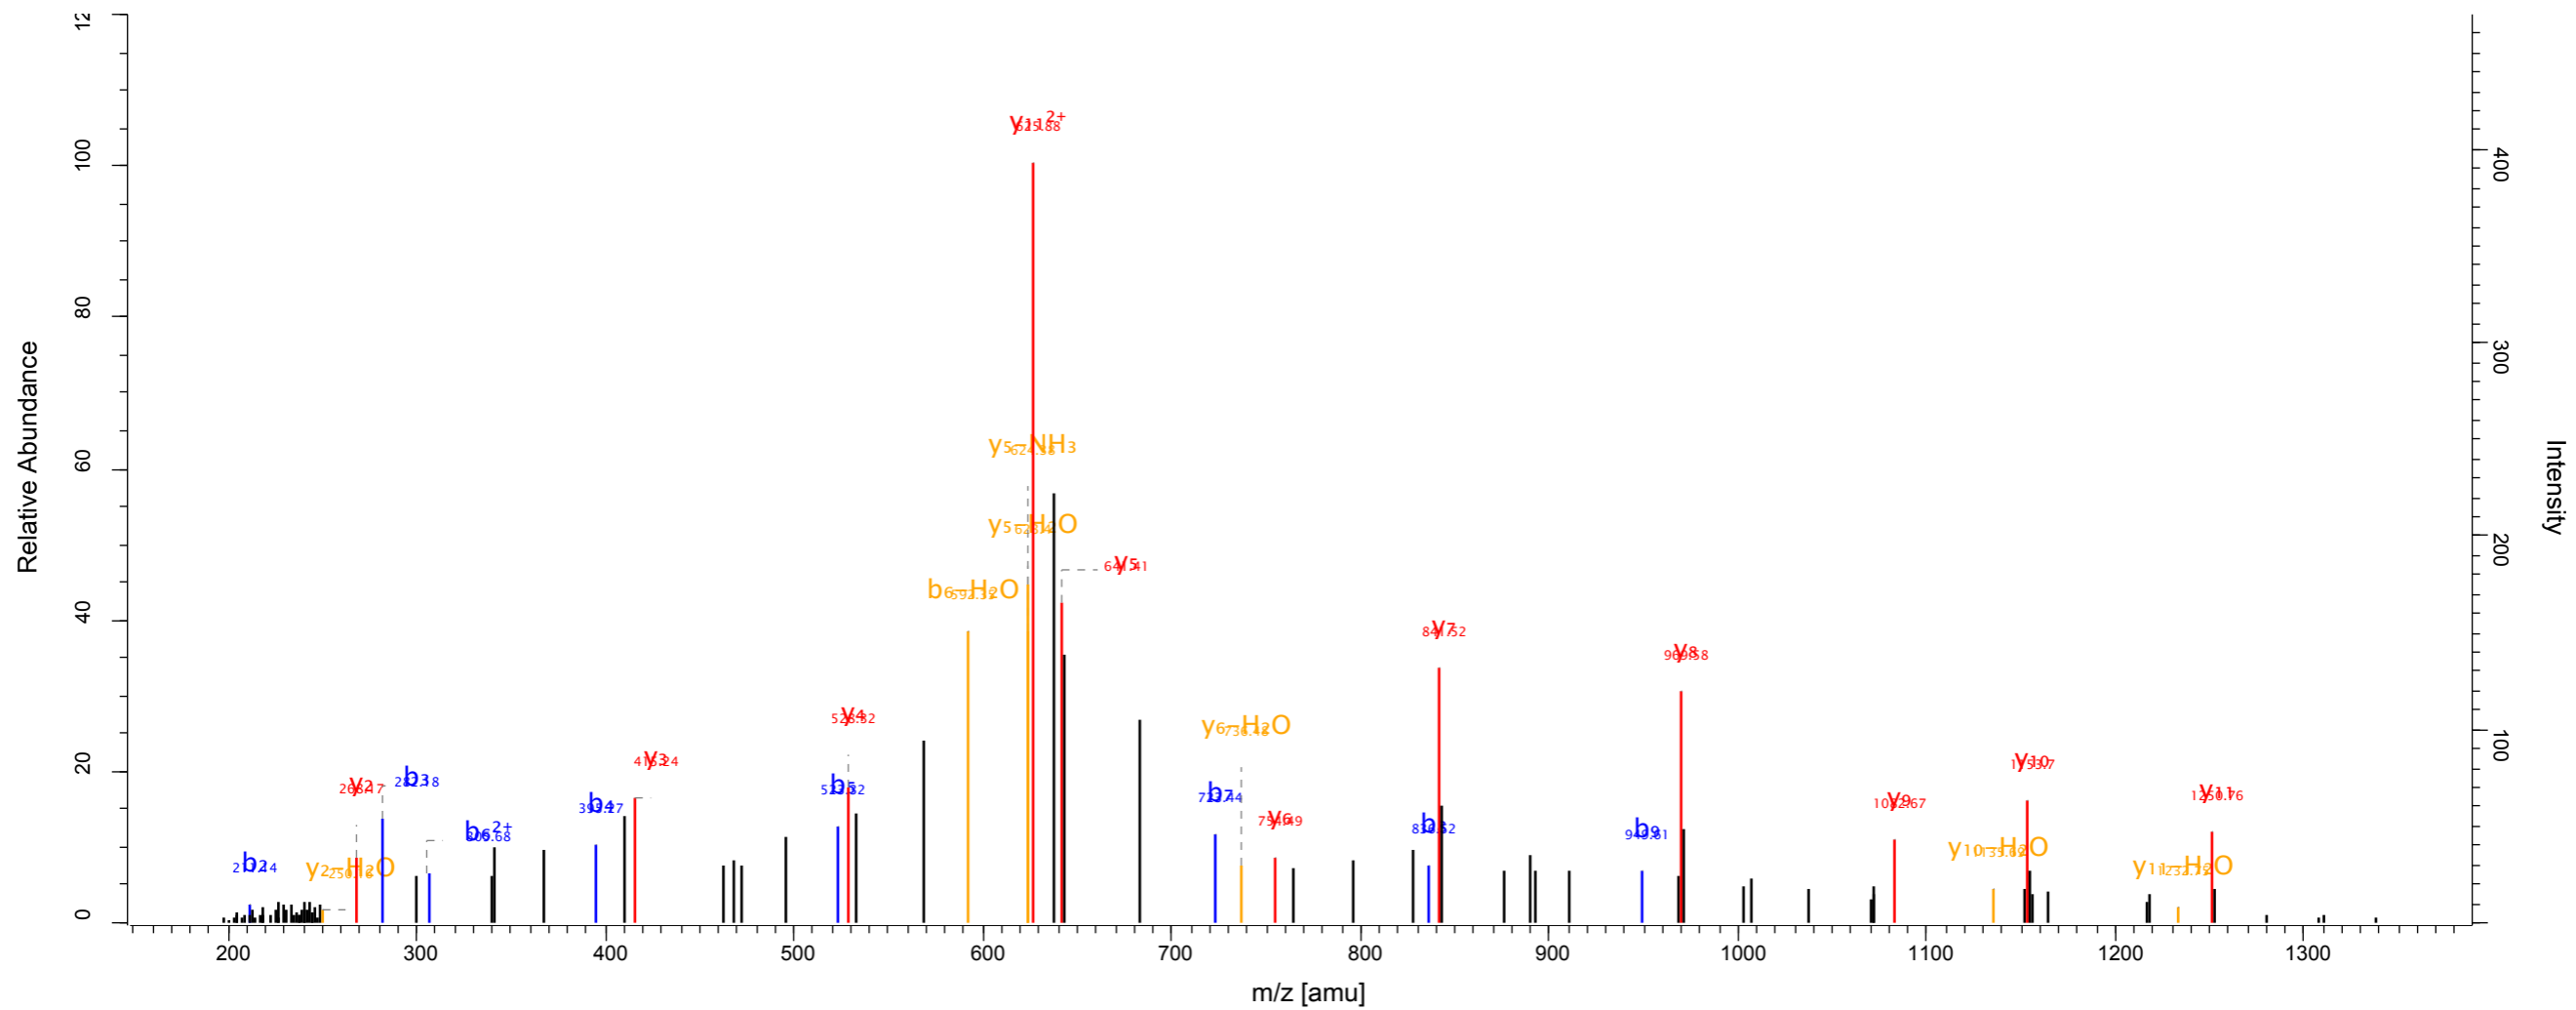

Scan number 8401 Raw file SKaraca\_LMB\_TCE\_Forward\_6\_191011\_rep2  
 Method ITMS; CID Pepti... 172.13

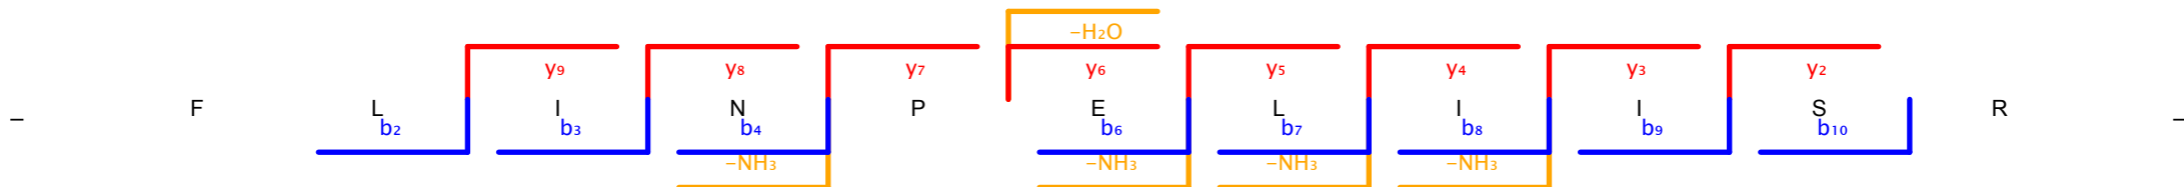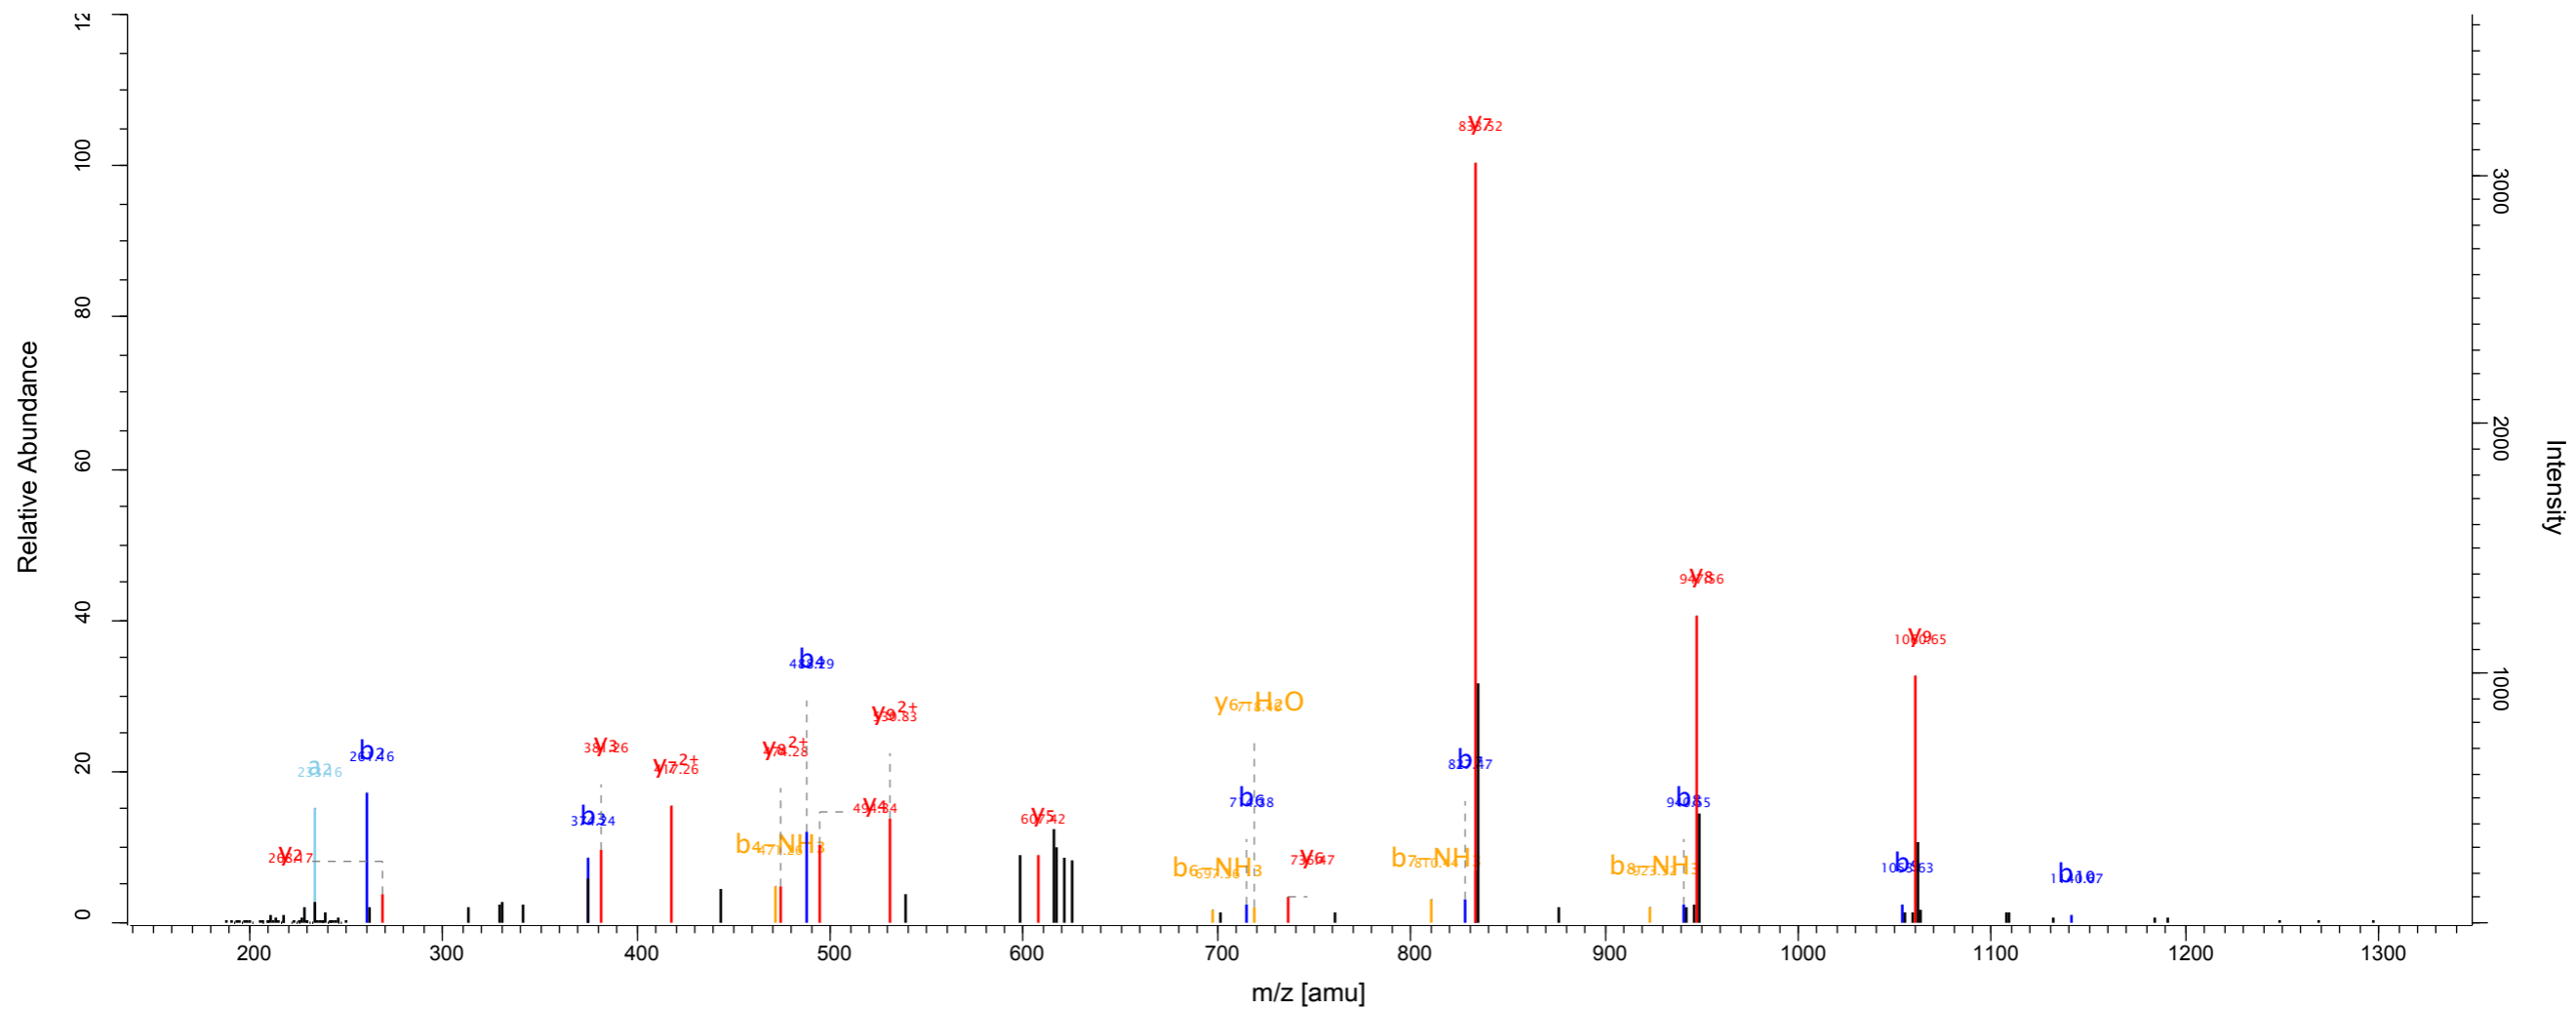

|             |           |          |                                       |
|-------------|-----------|----------|---------------------------------------|
| Scan number | 8562      | Raw file | SKaraca_LMB_TCE_Forward_6_191011_rep2 |
| Method      | ITMS; CID | Pepti... | 121.76                                |

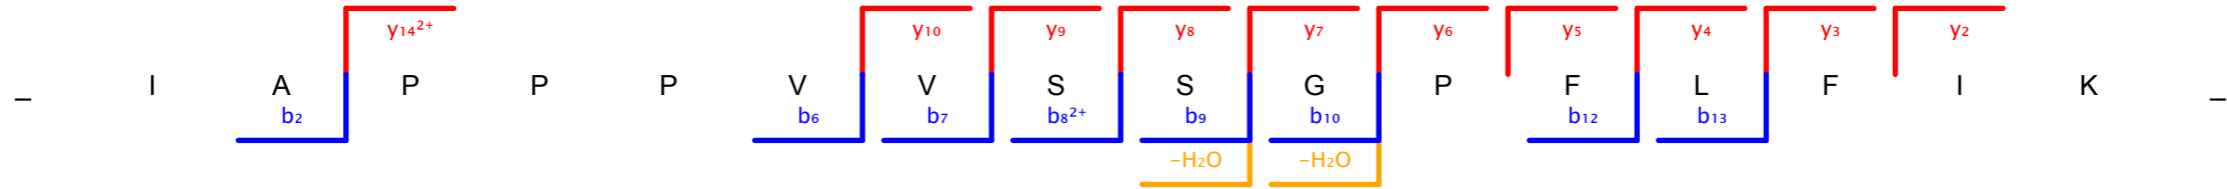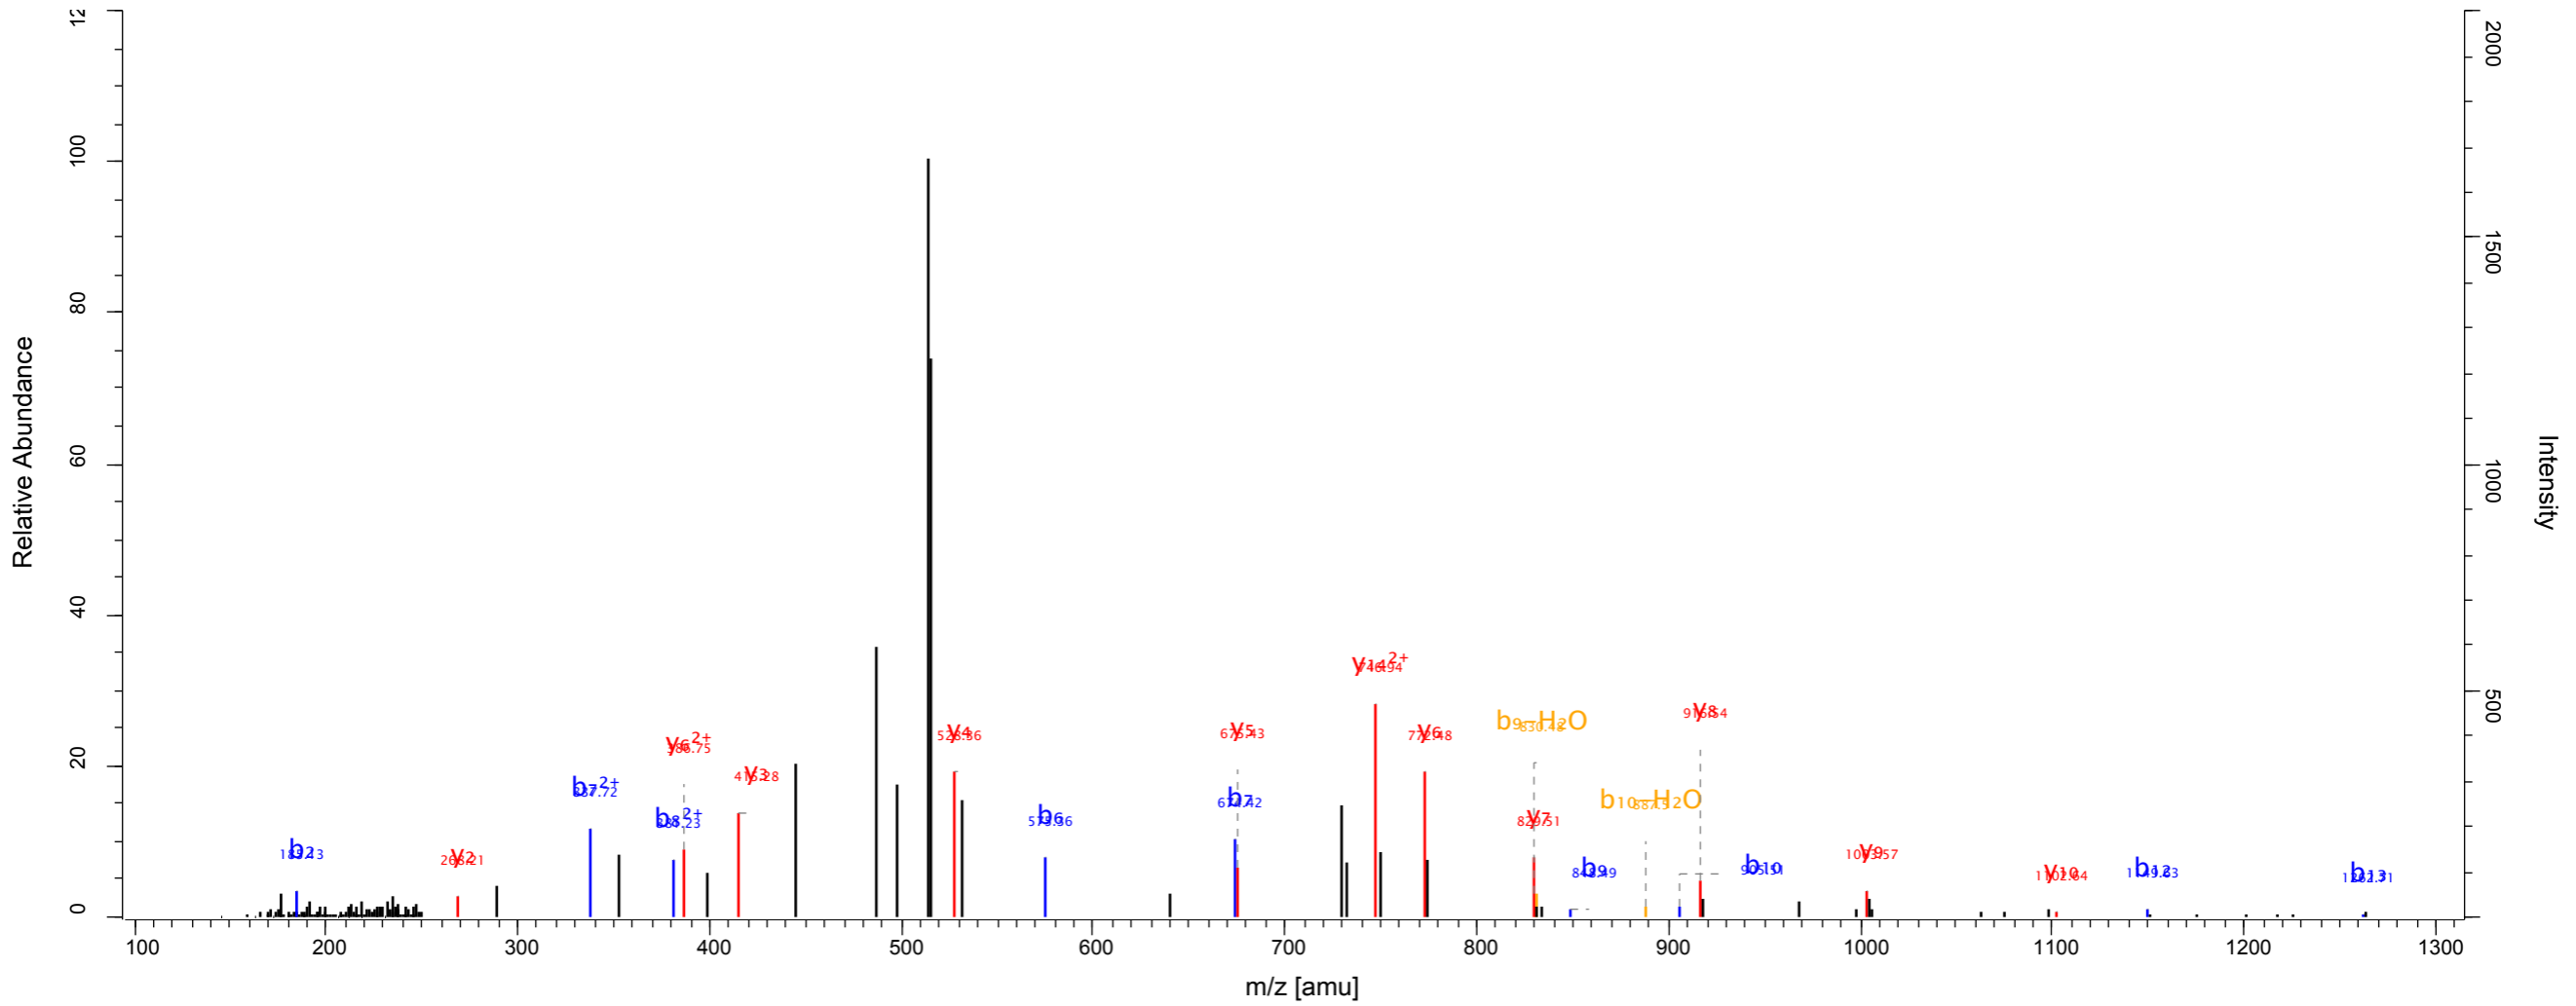

Scan number 8706 Raw file SKaraca\_LMB\_TCE\_Forward\_7\_191011\_rep1  
 Method ITMS; CID Pepti... 91.97

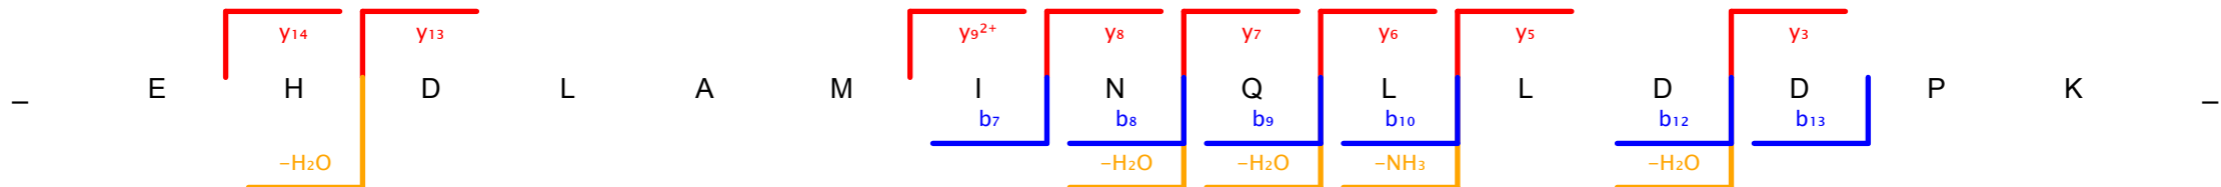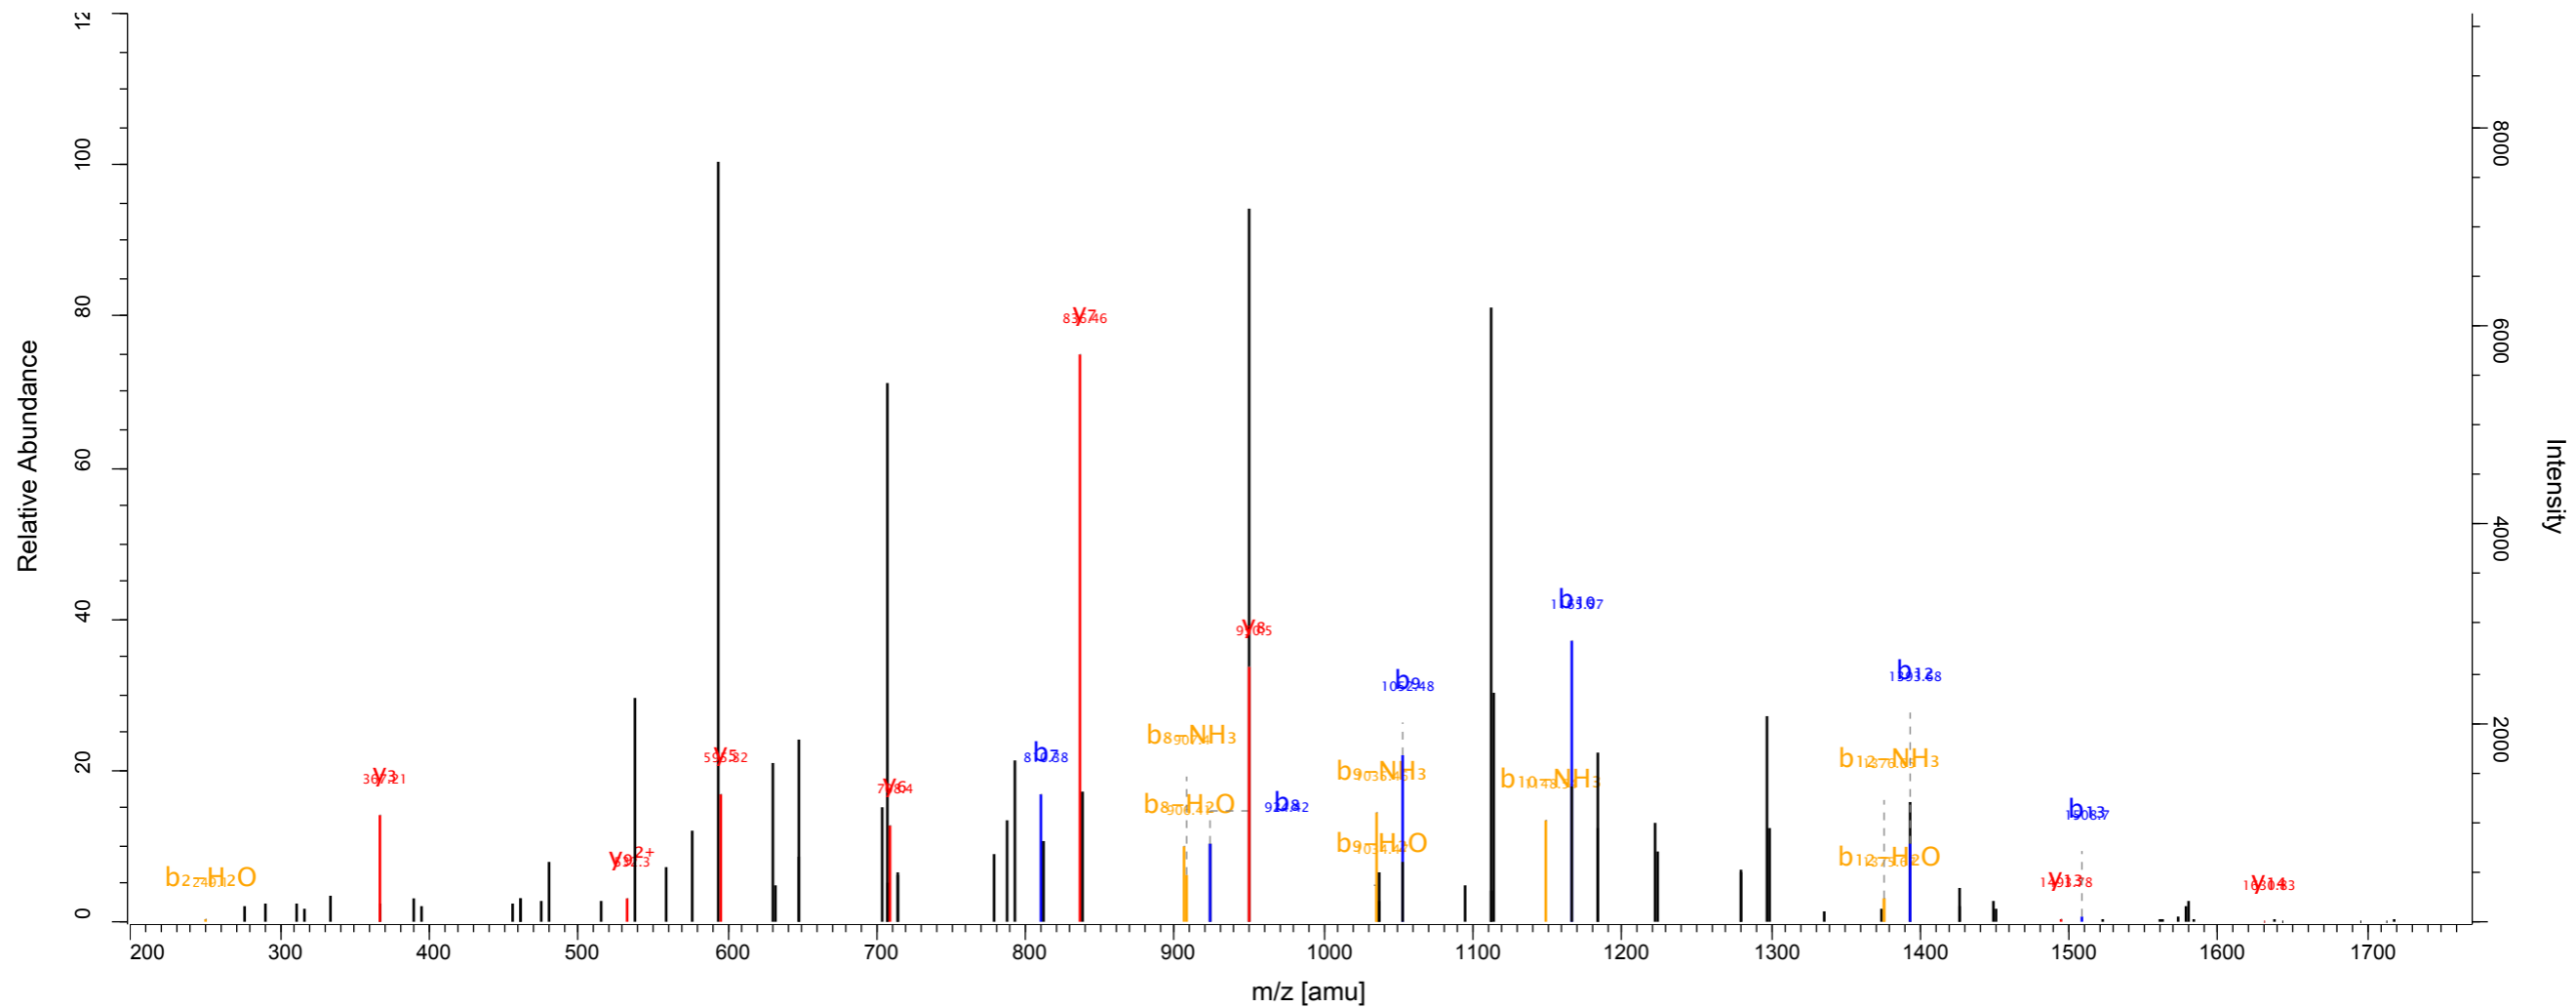

|             |           |          |                                       |
|-------------|-----------|----------|---------------------------------------|
| Scan number | 4544      | Raw file | SKaraca_LMB_TCE_Forward_7_191011_rep2 |
| Method      | ITMS; CID | Pepti... | 130.56                                |

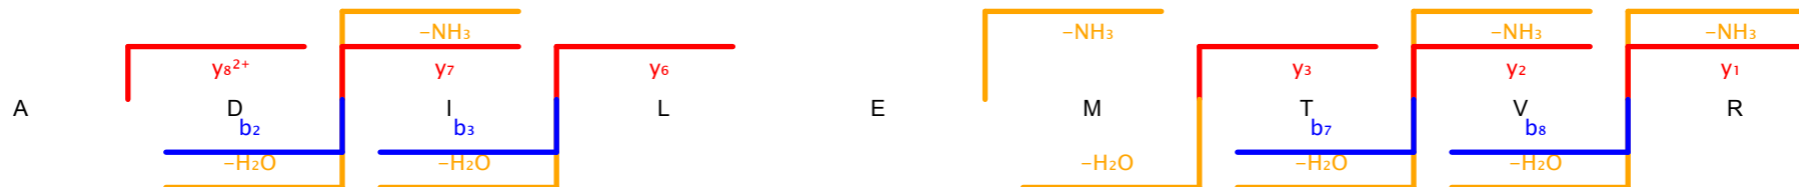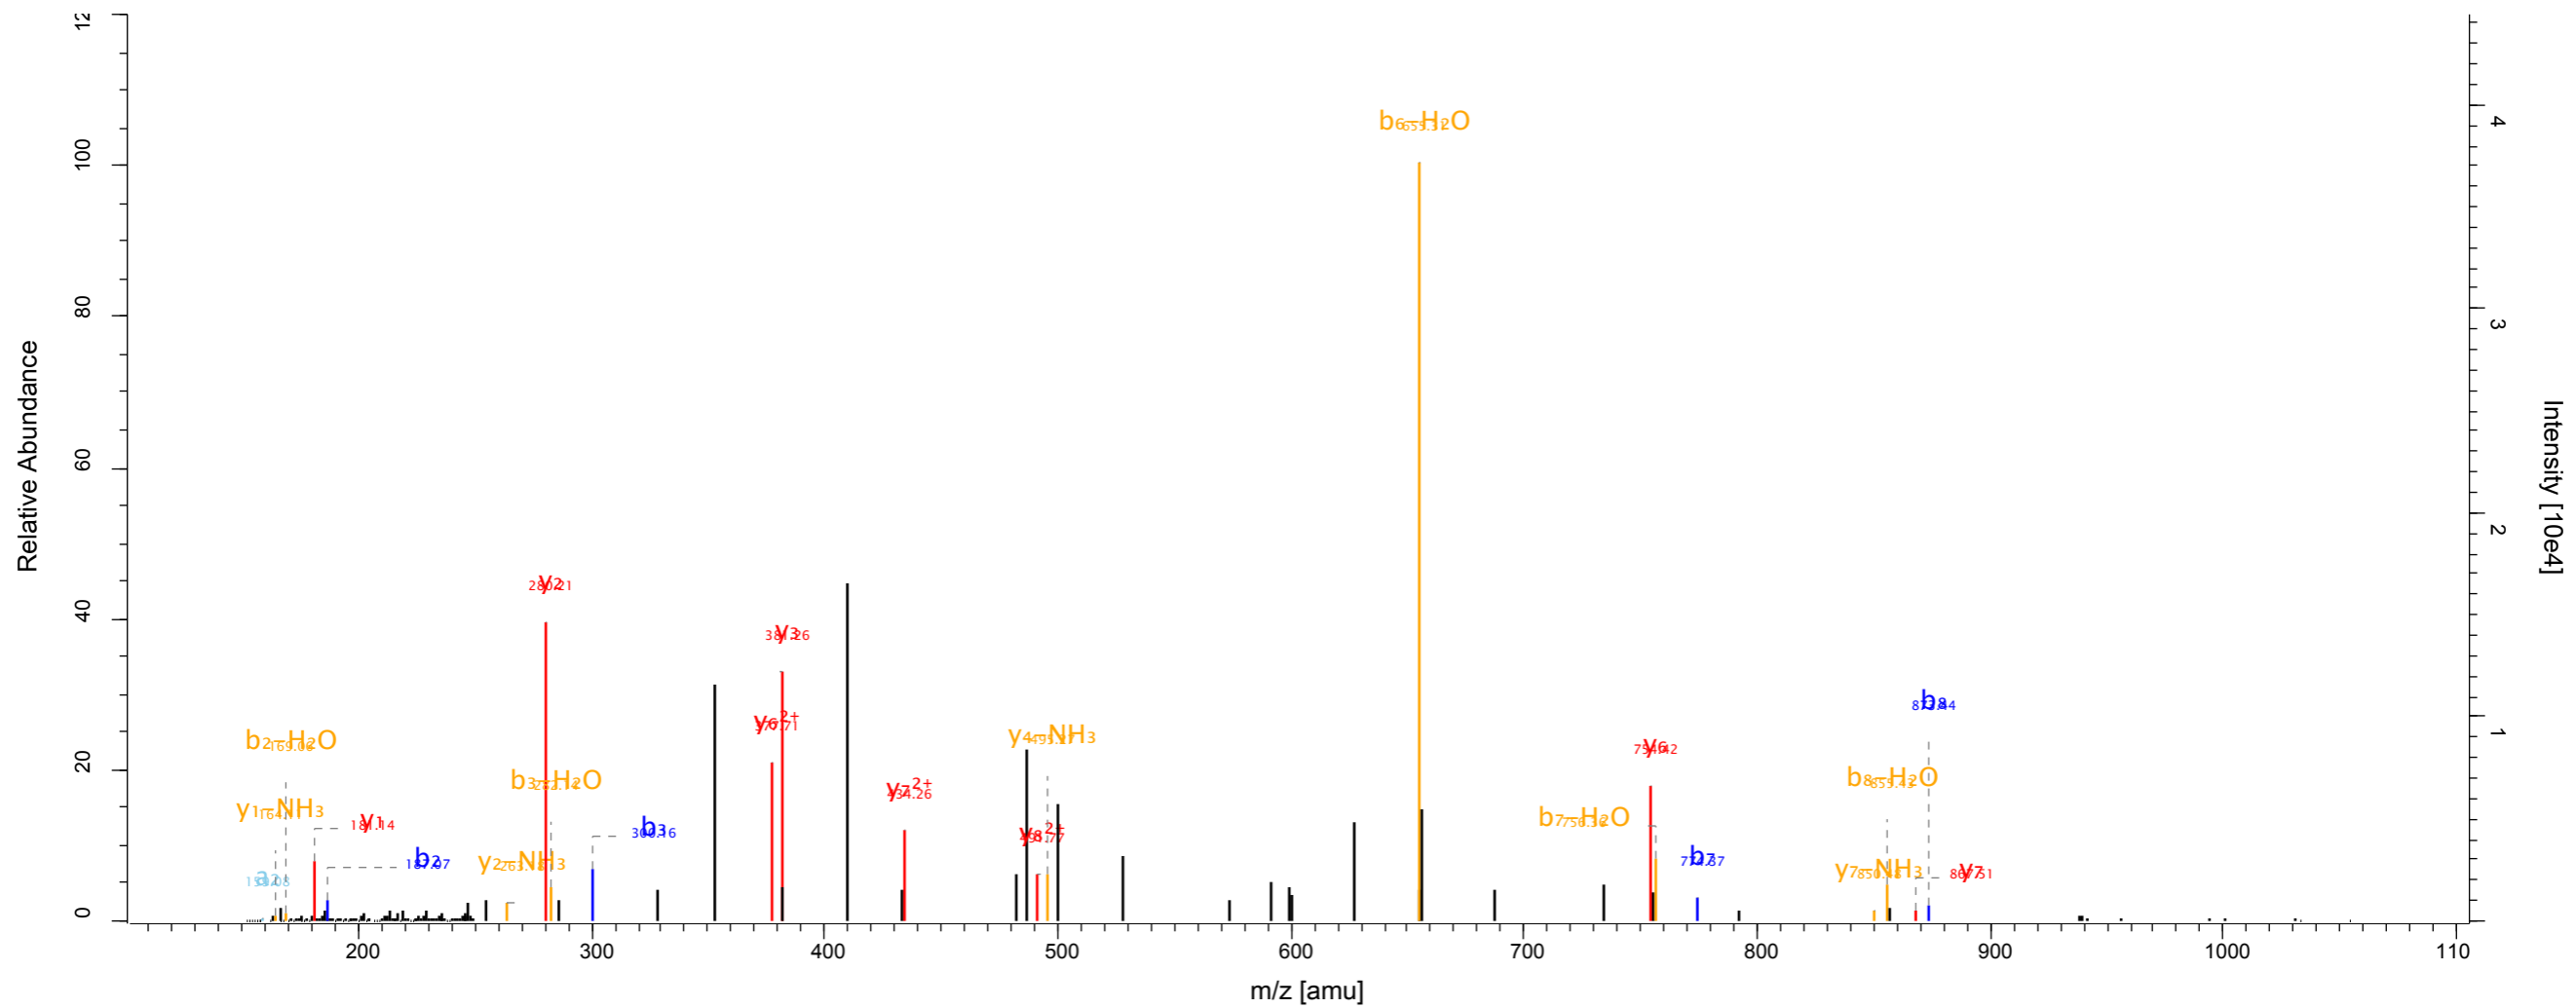

|             |           |          |                                       |
|-------------|-----------|----------|---------------------------------------|
| Scan number | 8208      | Raw file | SKaraca_LMB_TCE_Forward_7_191011_rep2 |
| Method      | ITMS; CID | Pepti... | 143.24                                |

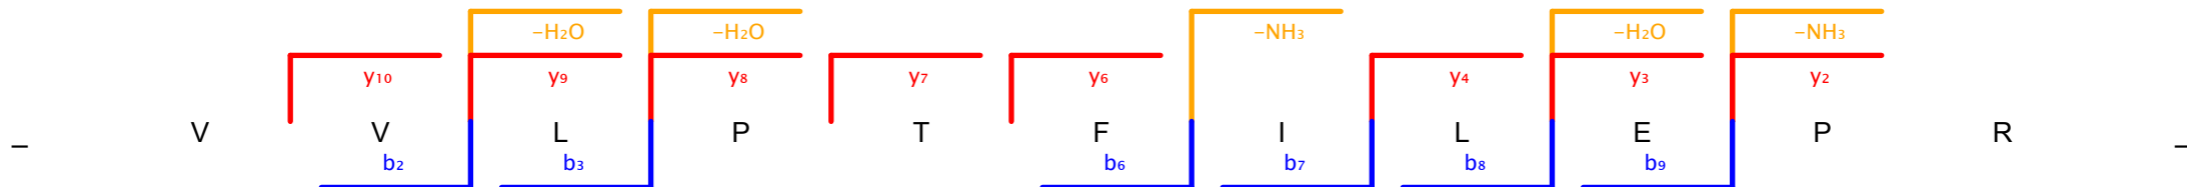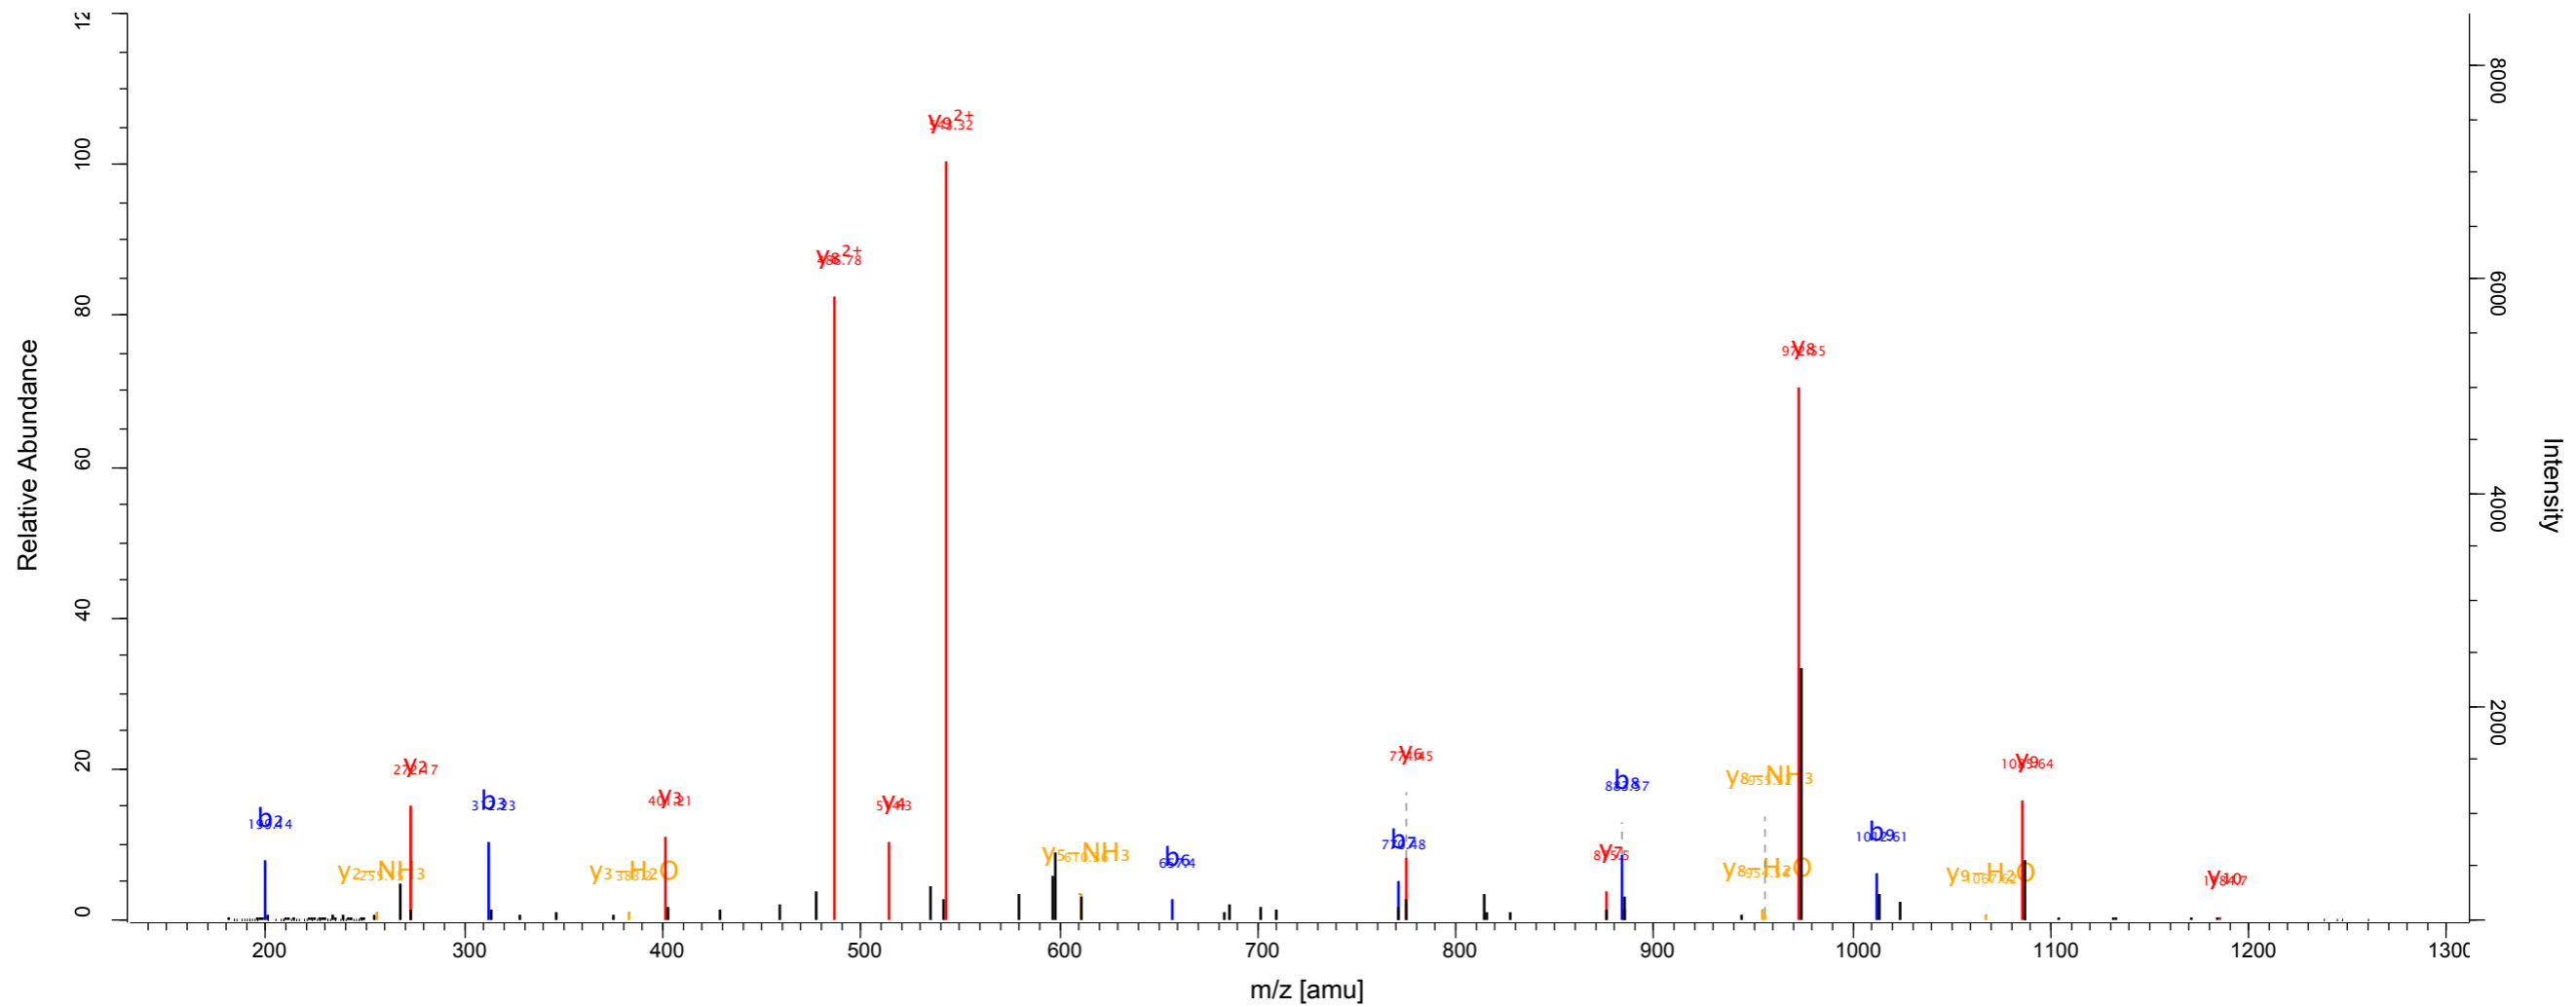

Scan number 8336 Raw file SKaraca\_LMB\_TCE\_Forward\_7\_191011\_rep3  
 Method ITMS; CID Pepti... 143.86

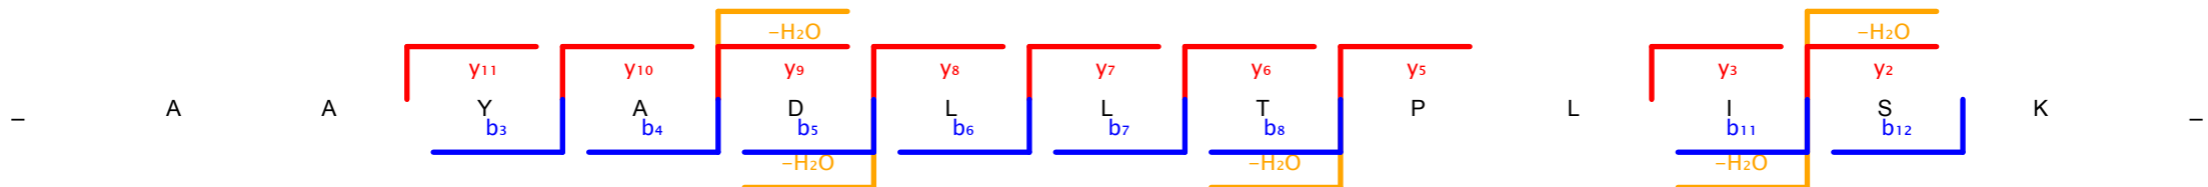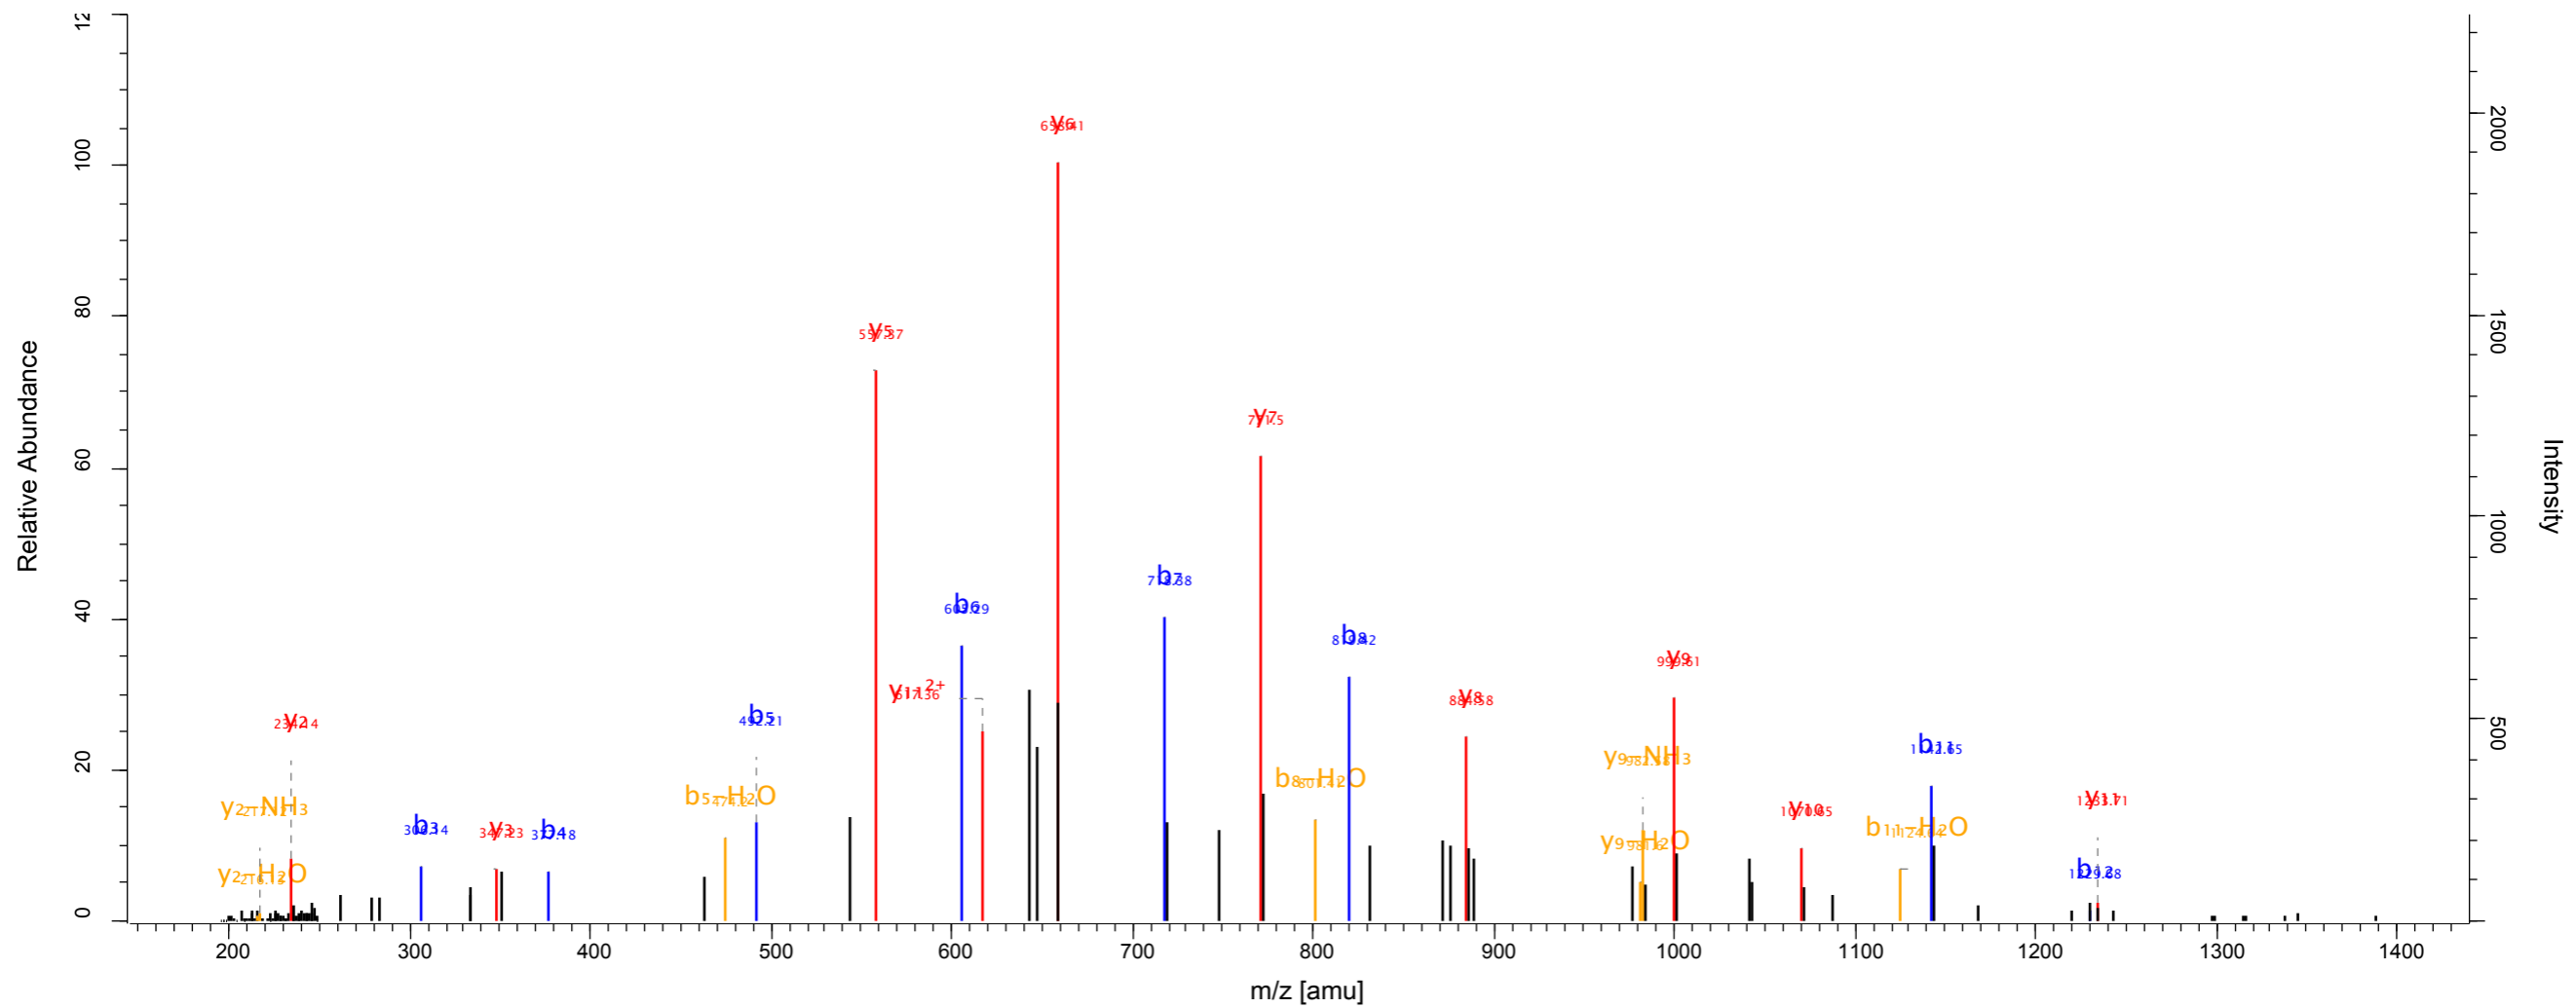



Scan number 3251 Raw file SKaraca\_LMB\_TCE\_Forward\_8\_191011\_rep1  
 Method ITMS; CID Pepti... 189.09

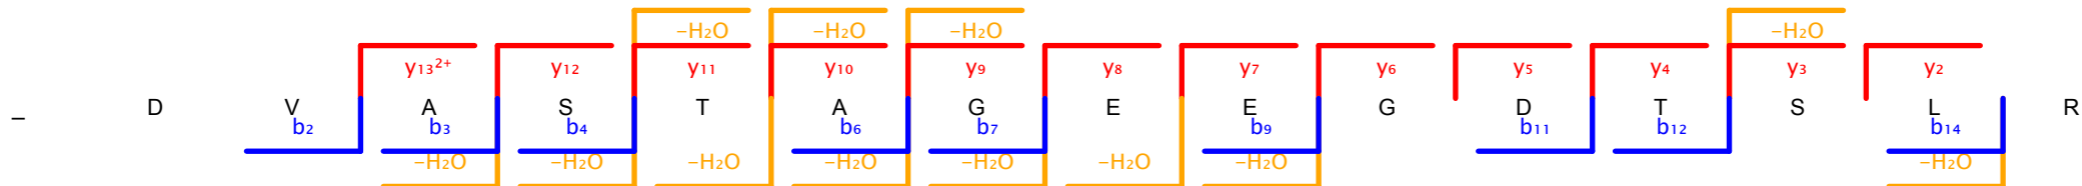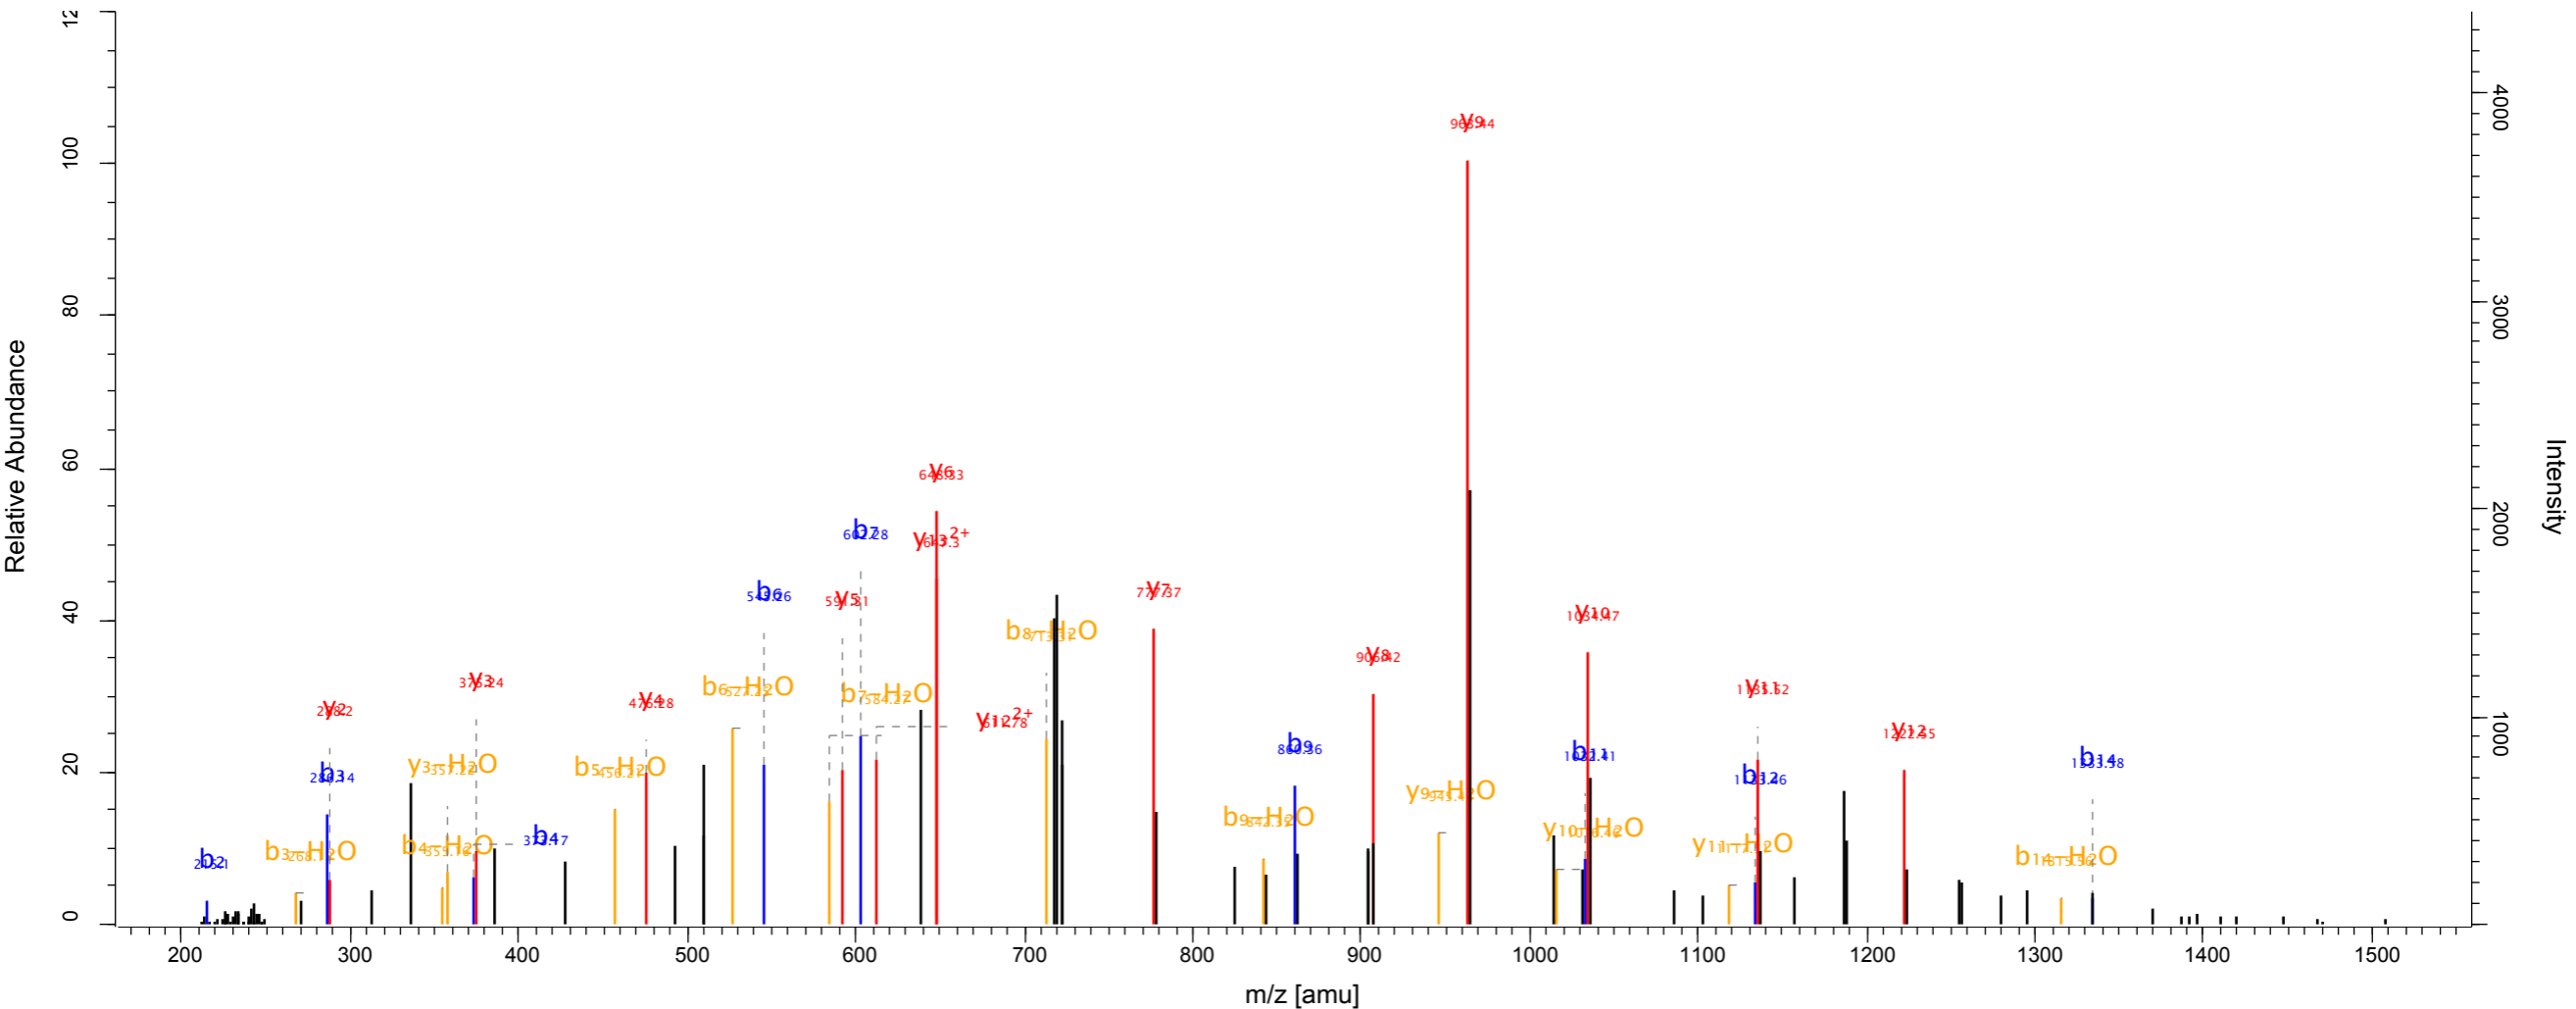

Scan number 4103 Raw file SKaraca\_LMB\_TCE\_Forward\_8\_191011\_rep1  
 Method ITMS; CID Pepti... 151.54

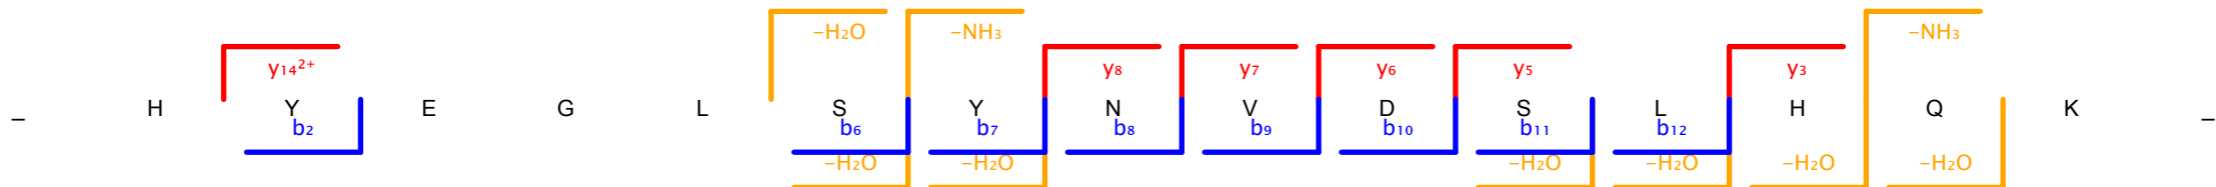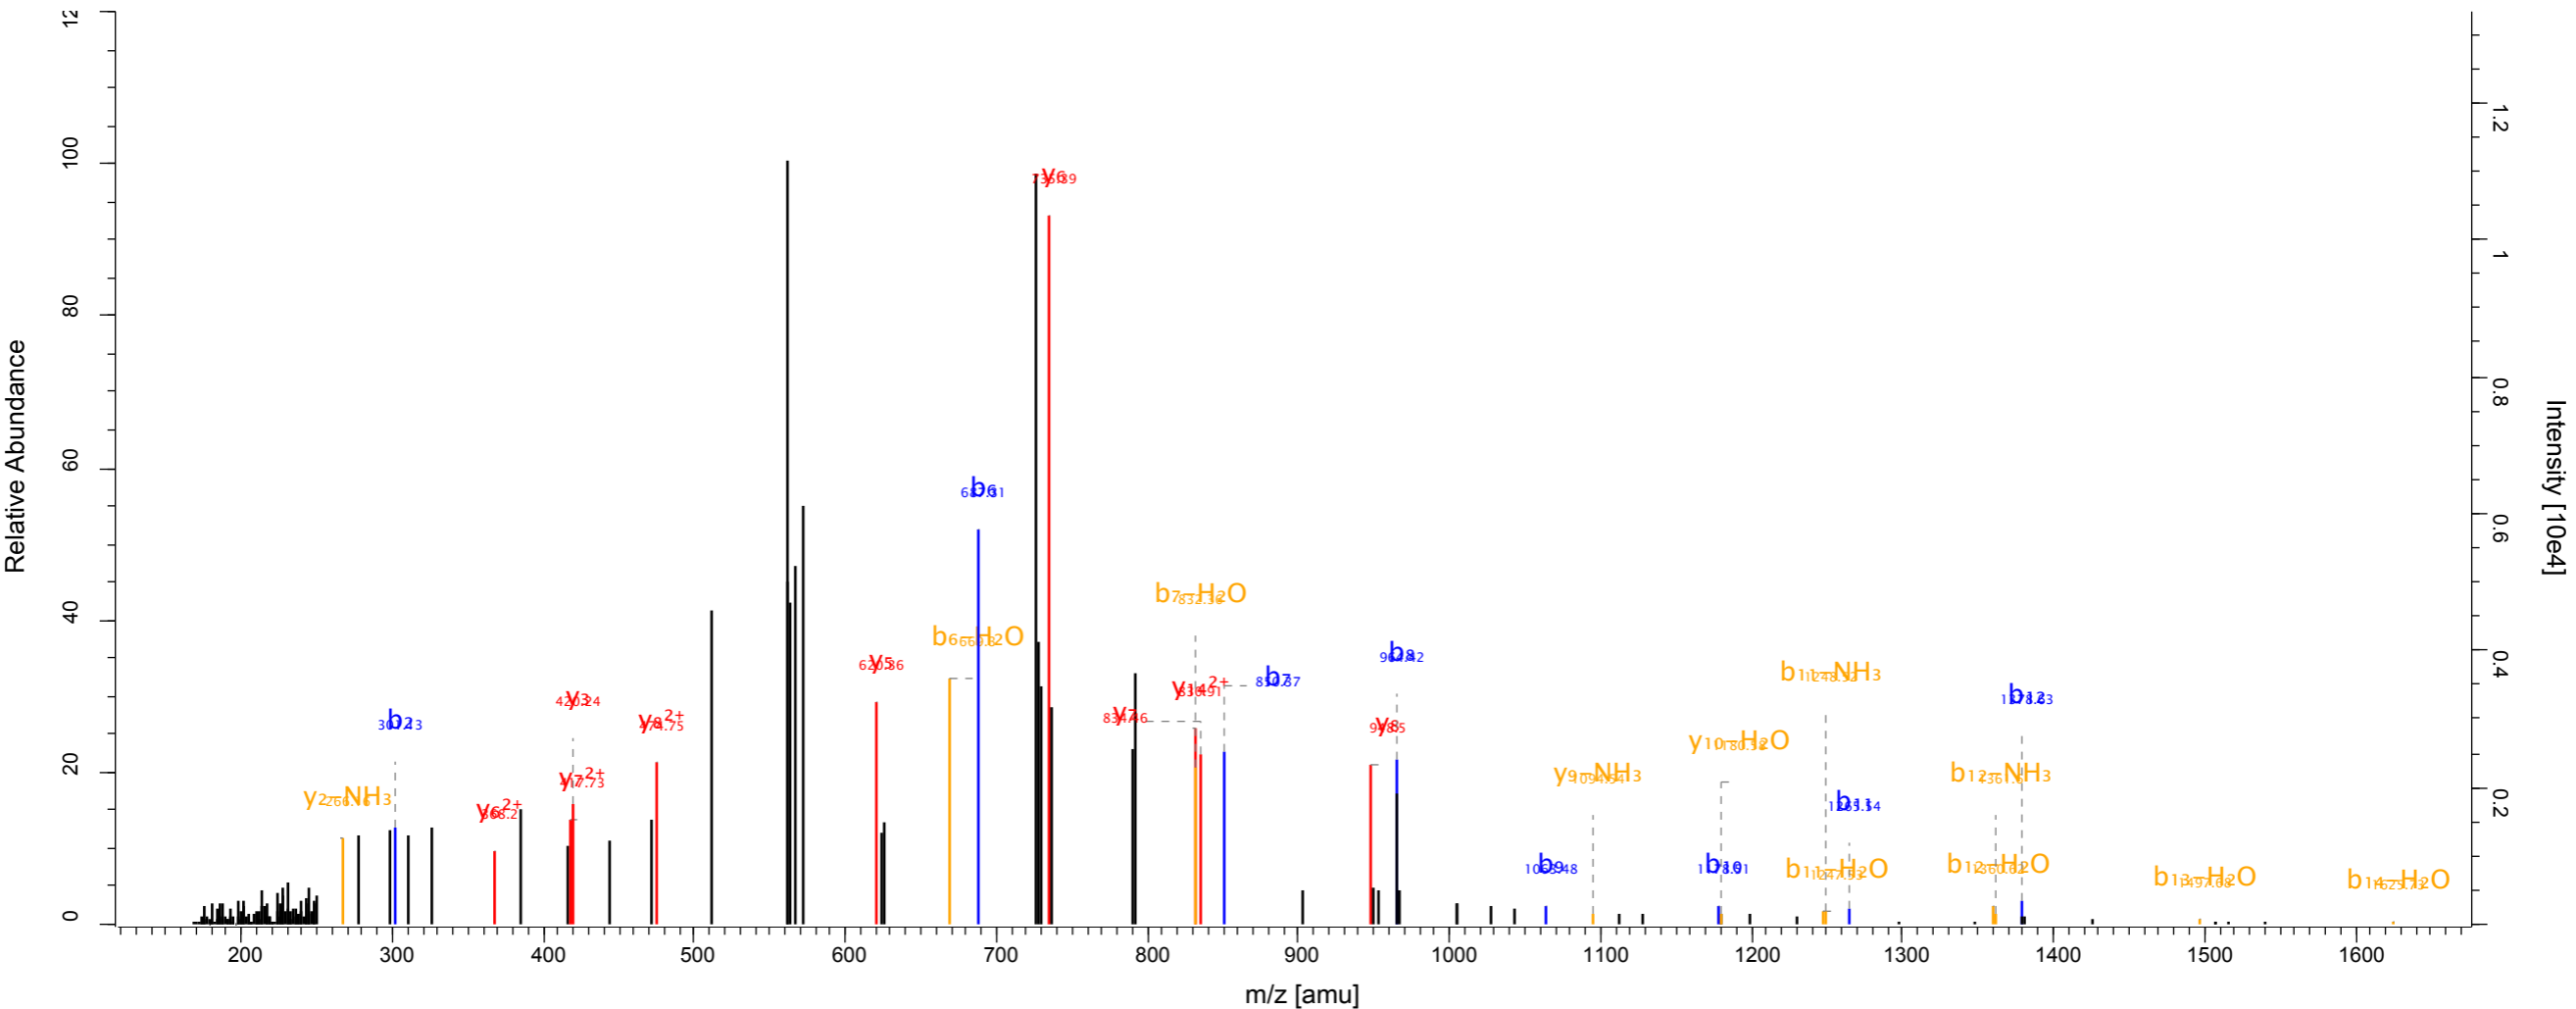

|             |           |          |                                       |
|-------------|-----------|----------|---------------------------------------|
| Scan number | 6515      | Raw file | SKaraca_LMB_TCE_Forward_8_191011_rep1 |
| Method      | ITMS; CID | Pepti... | 148.32                                |

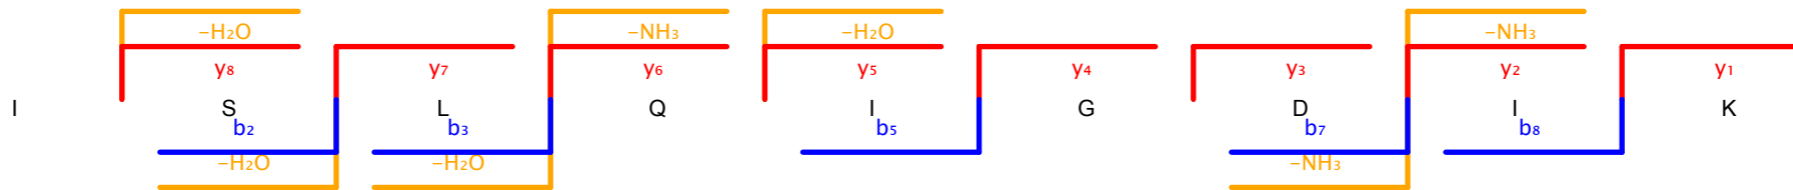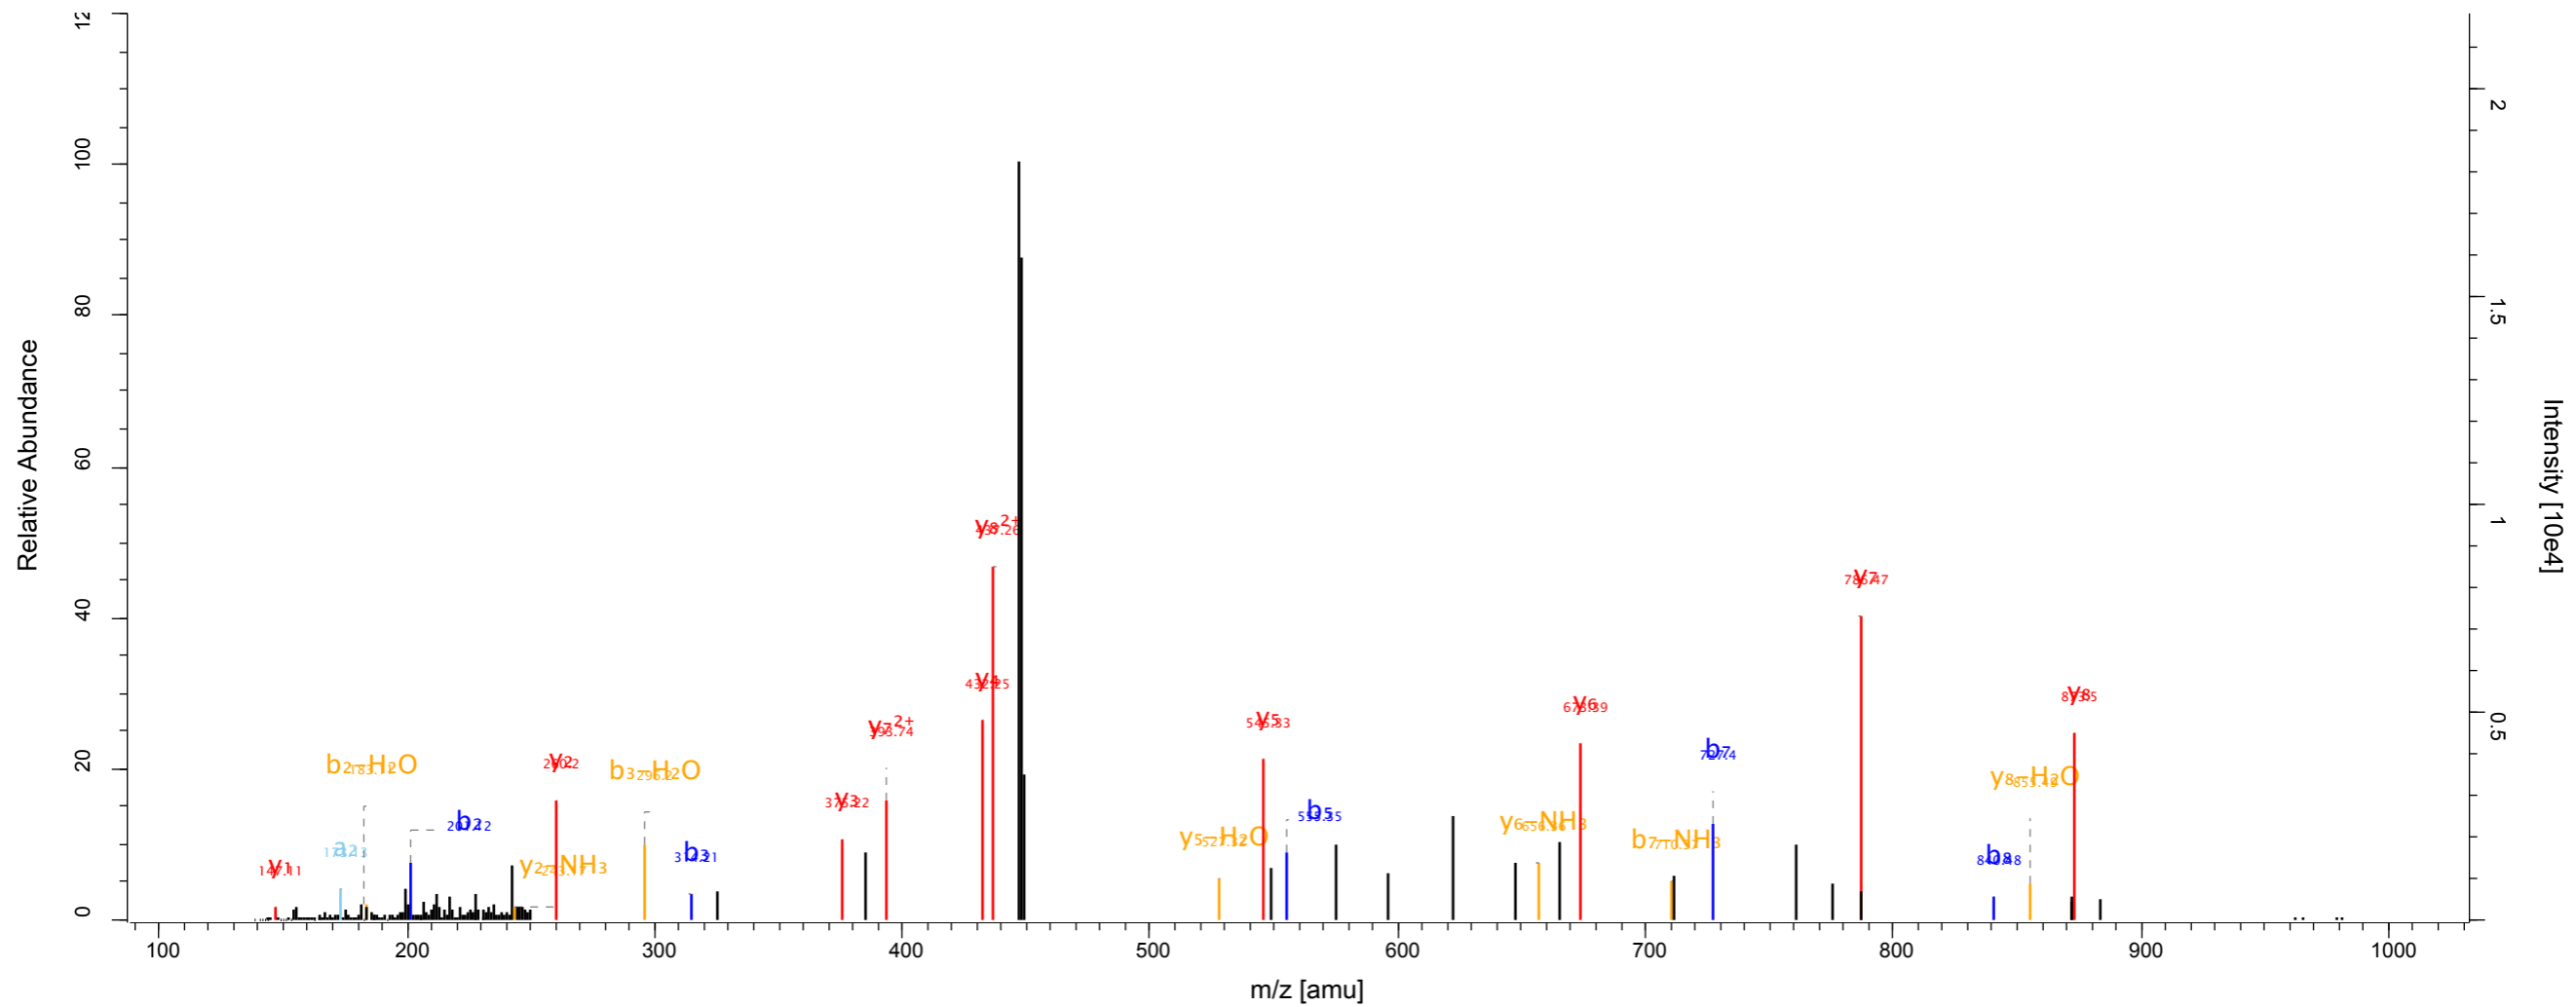

Scan number 7564 Raw file SKaraca\_LMB\_TCE\_Forward\_8\_191011\_rep1  
 Method ITMS; CID Pepti... 126.83

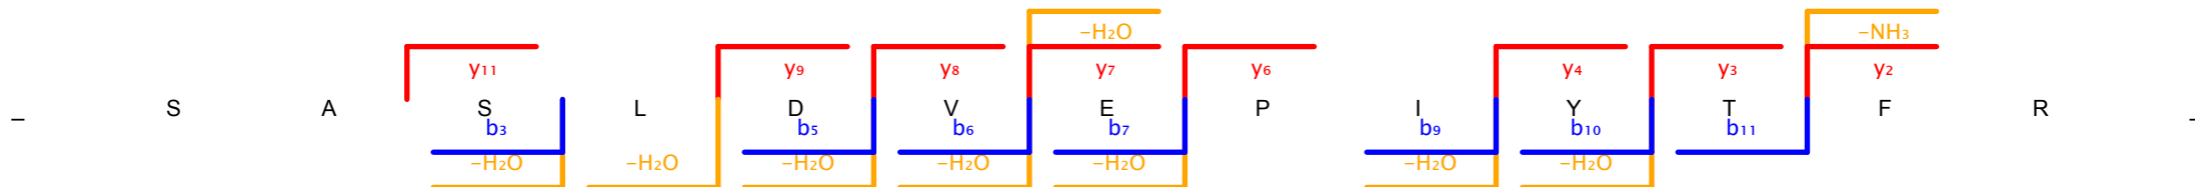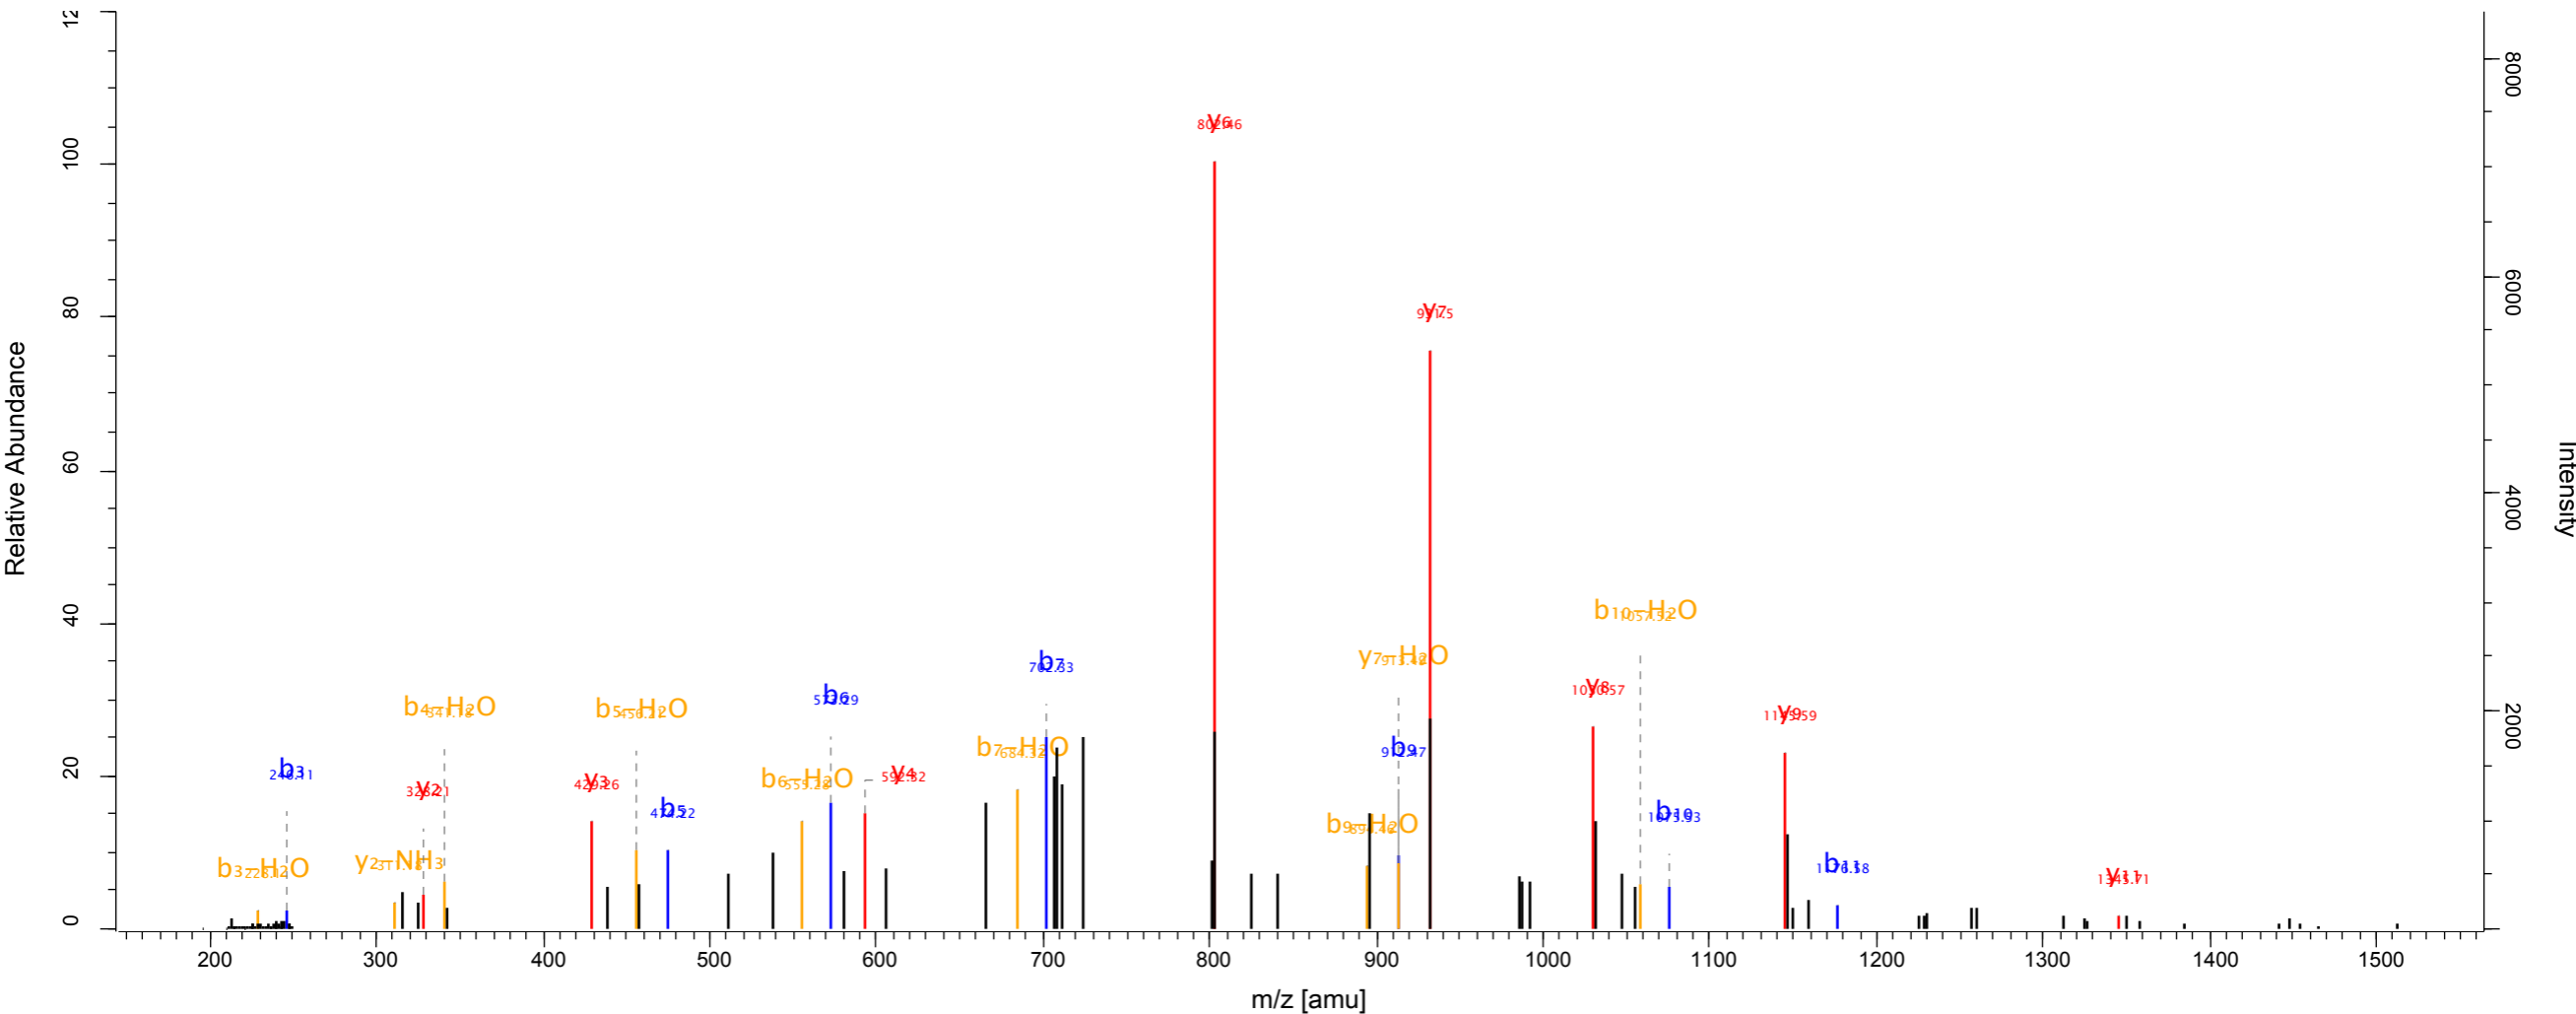

|             |           |          |                                       |
|-------------|-----------|----------|---------------------------------------|
| Scan number | 8501      | Raw file | SKaraca_LMB_TCE_Forward_8_191011_rep1 |
| Method      | ITMS; CID | Pepti... | 123.63                                |

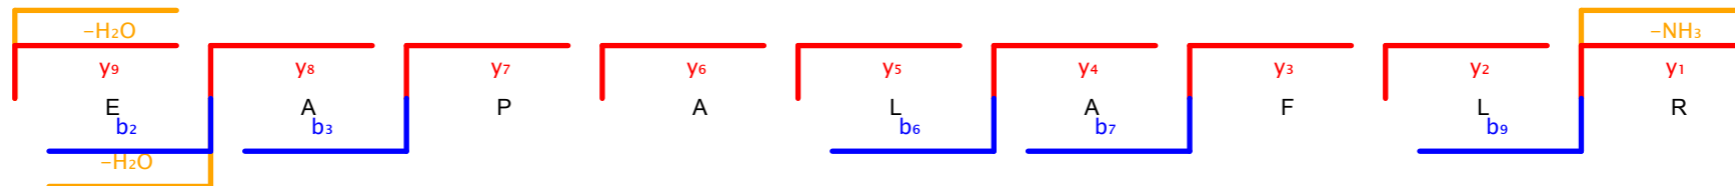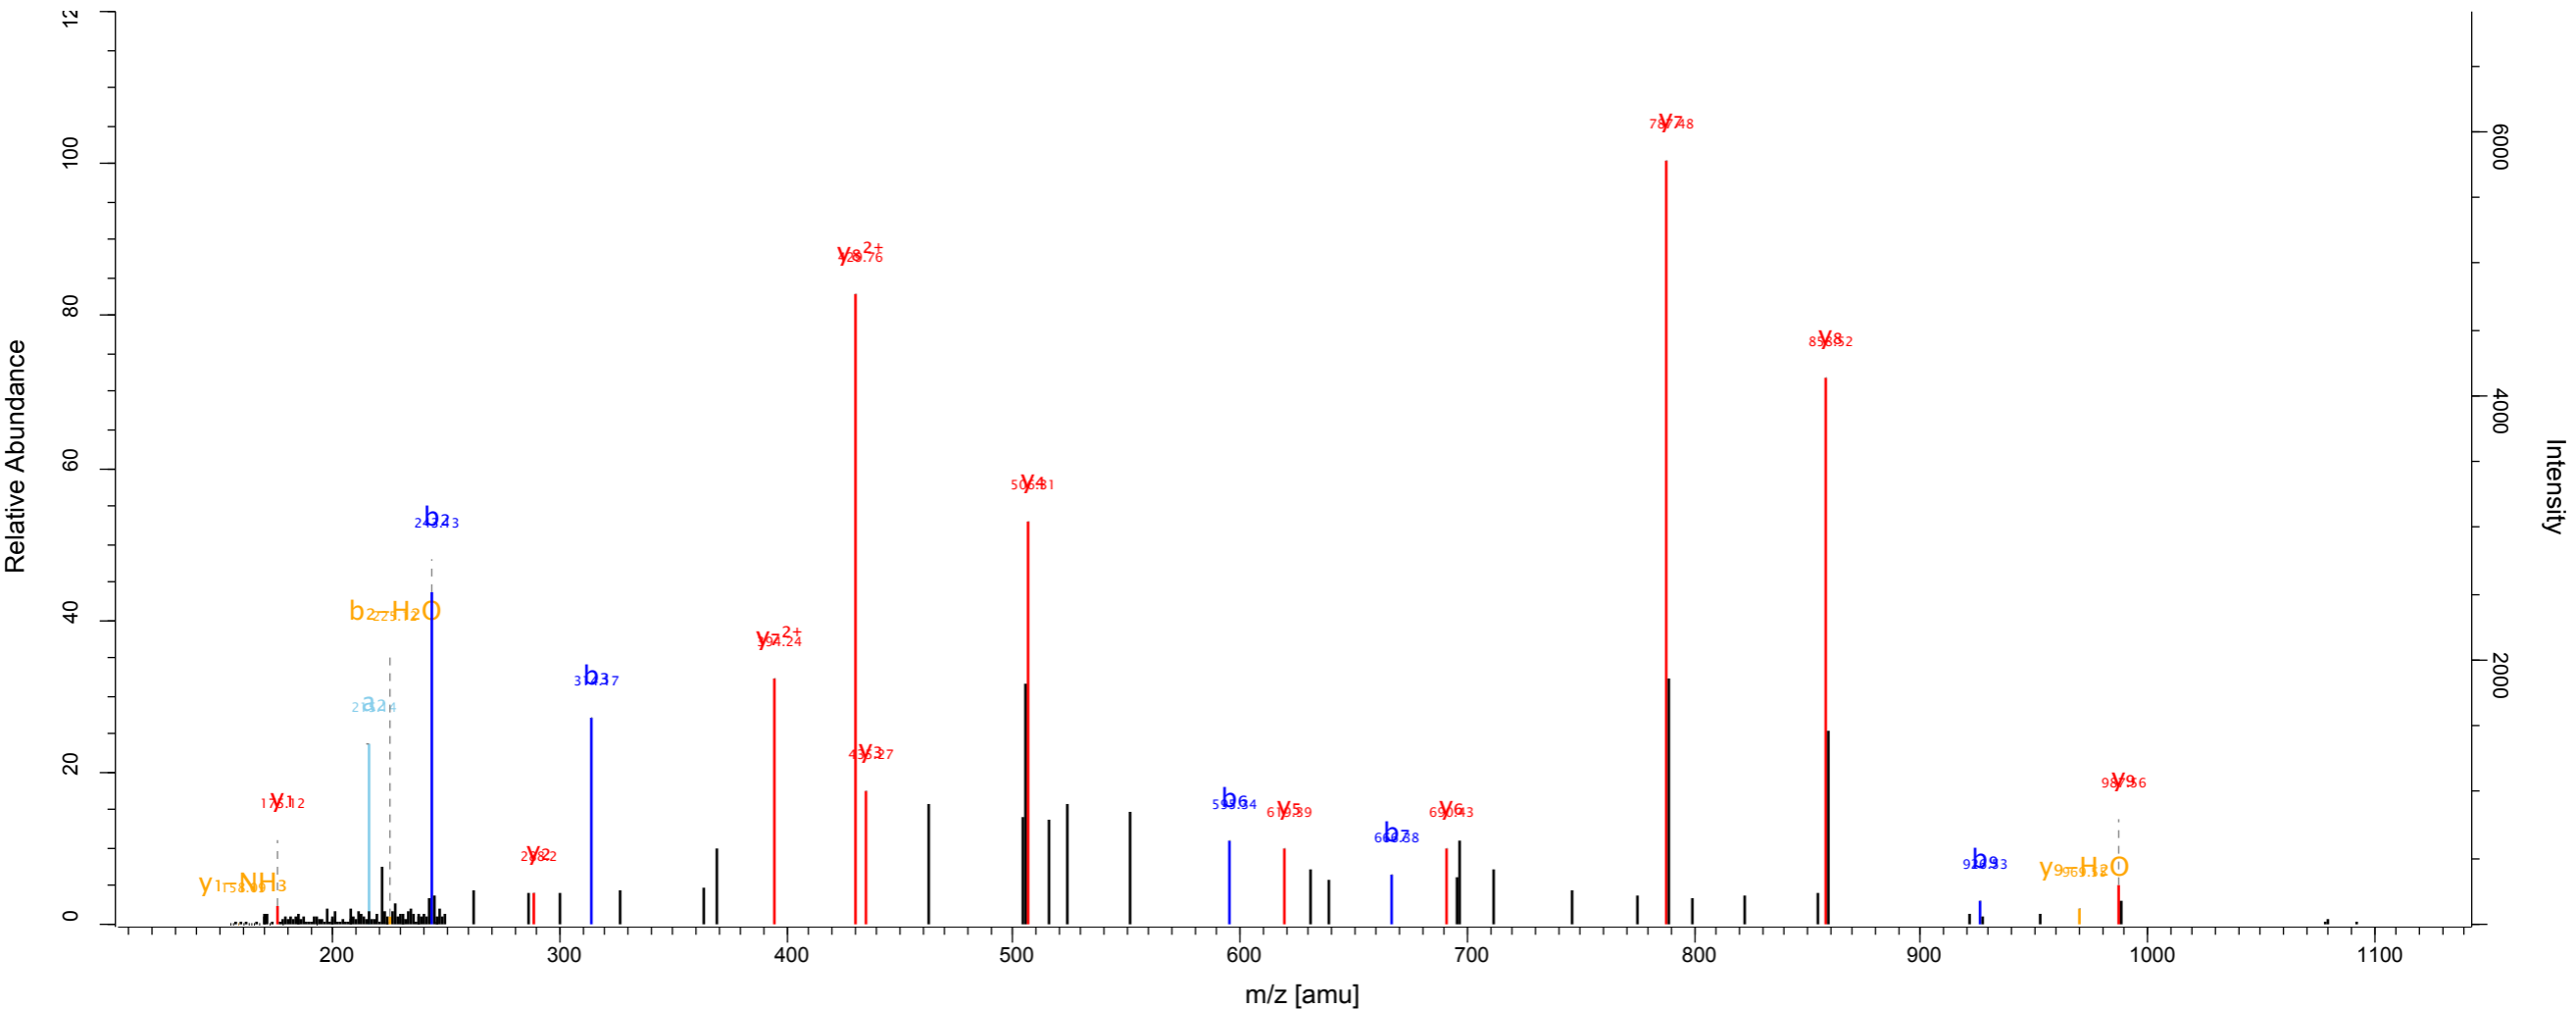

Scan number 9360 Raw file SKaraca\_LMB\_TCE\_Forward\_8\_191011\_rep1  
Method ITMS; CID Pepti... 116.01

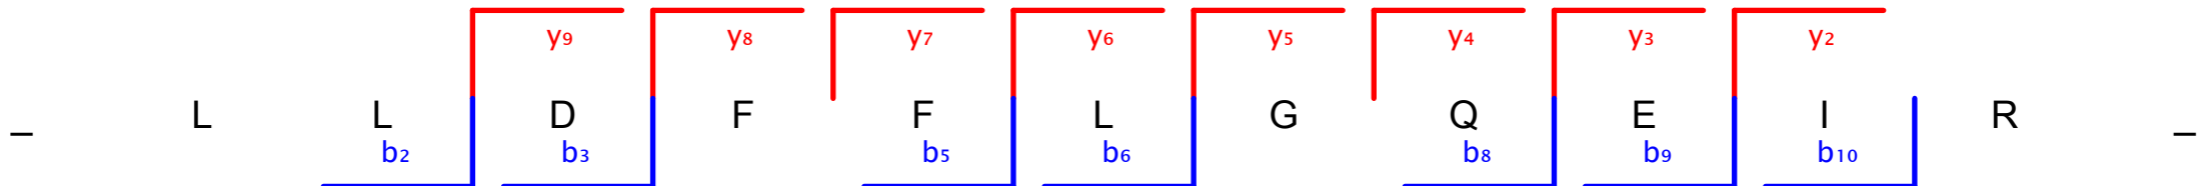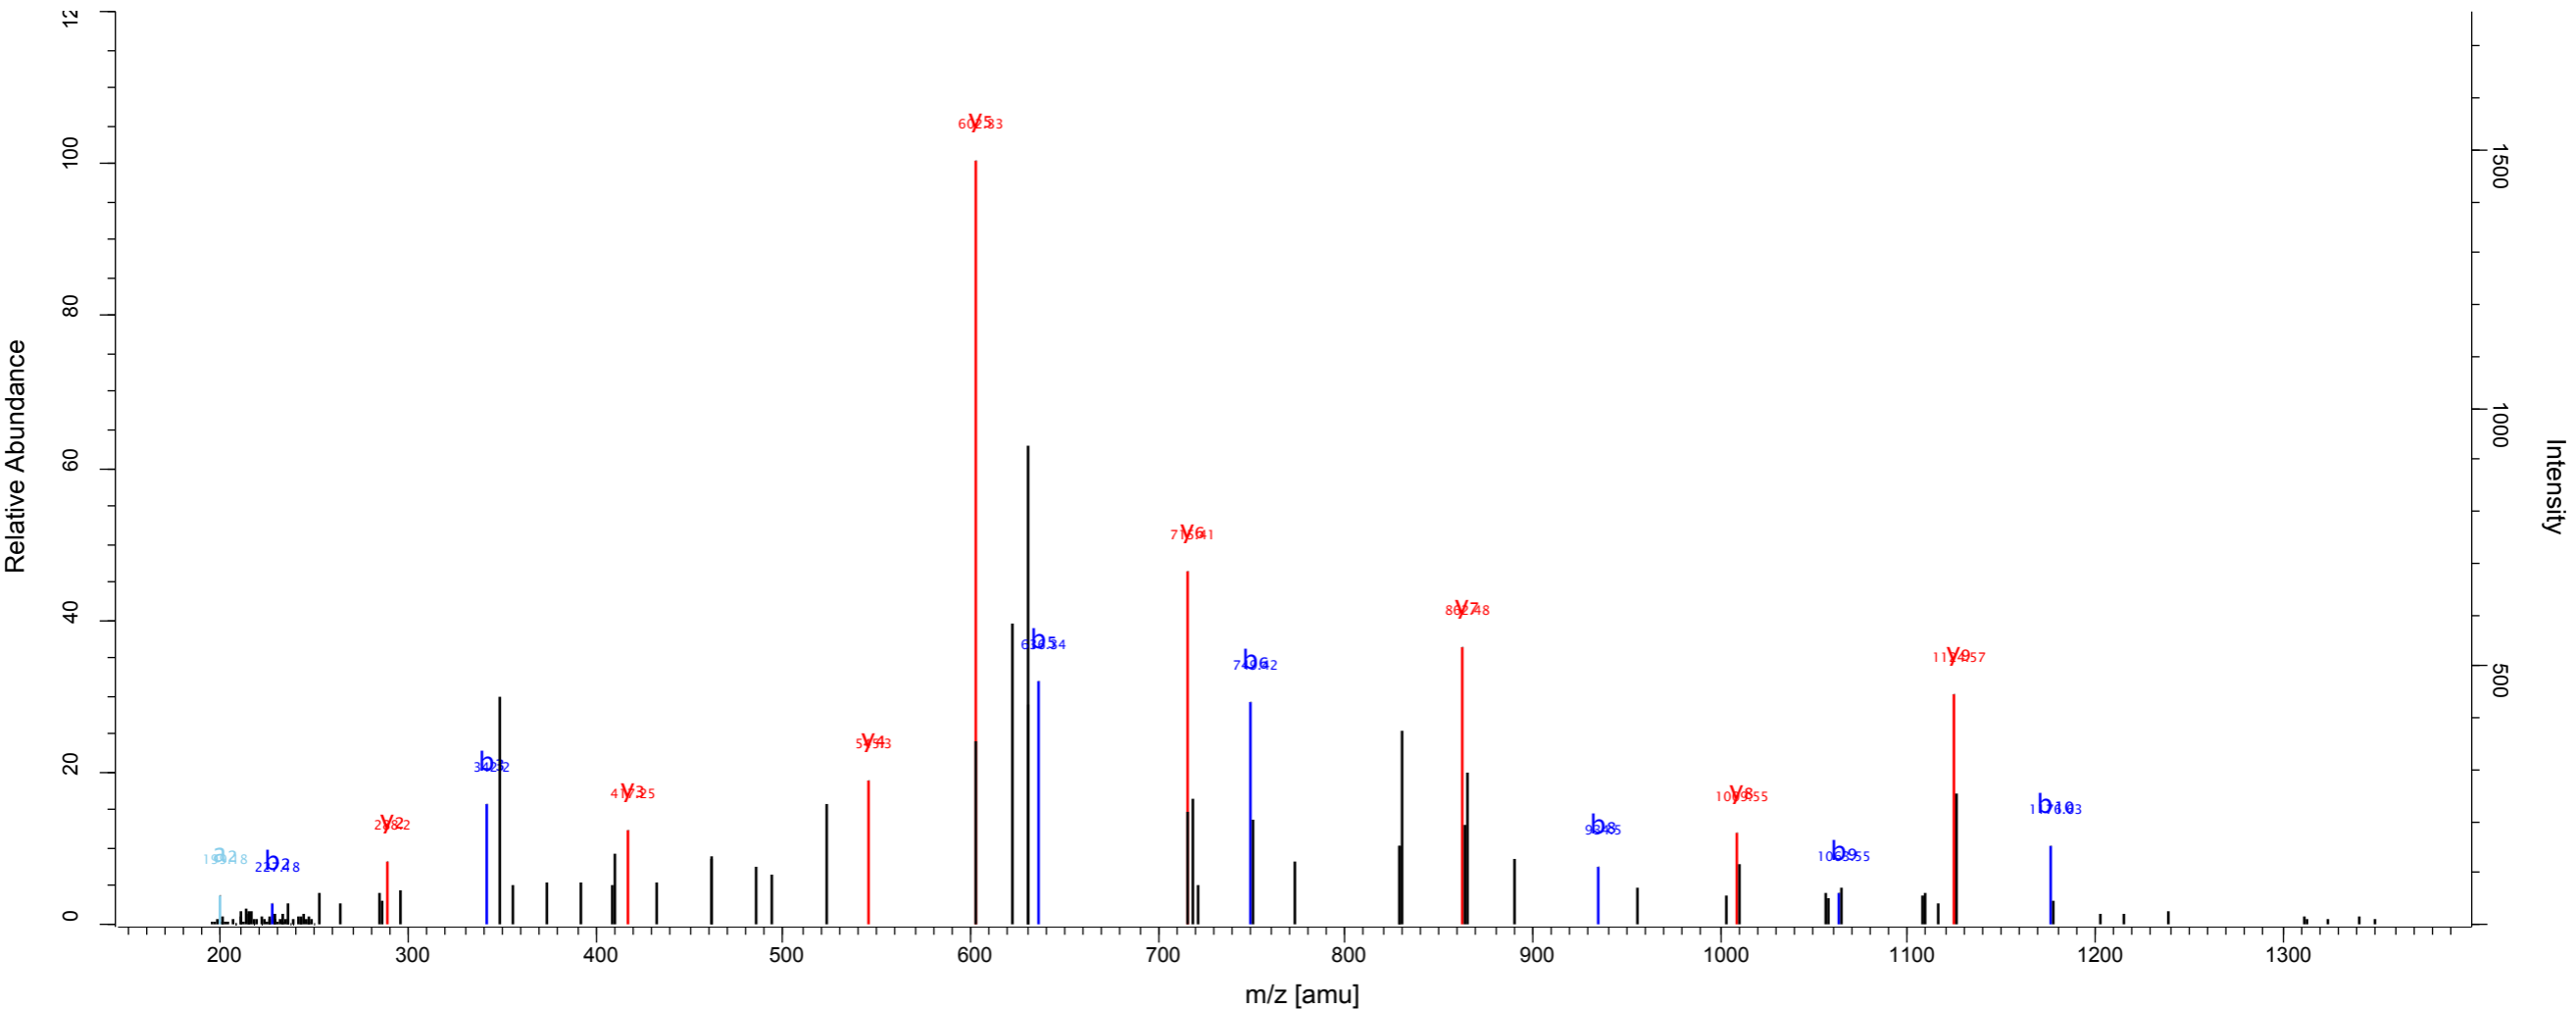

Scan number 9365 Raw file SKaraca\_LMB\_TCE\_Forward\_8\_191011\_rep1  
 Method ITMS; CID Pepti... 129.82

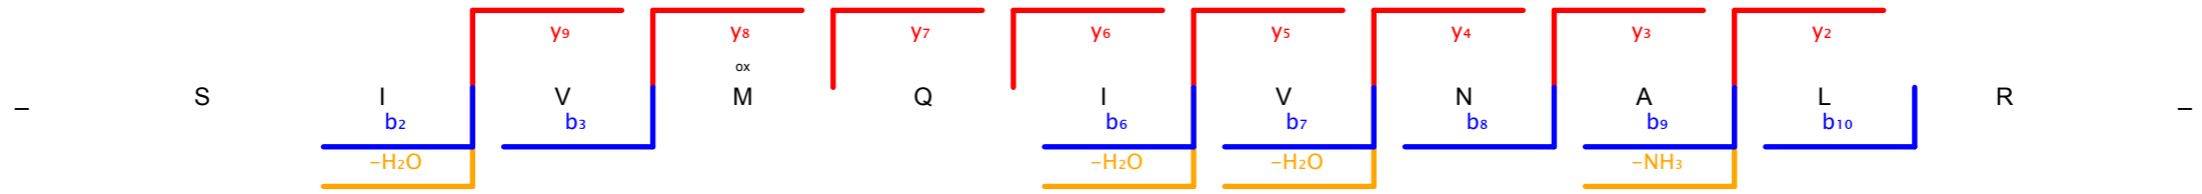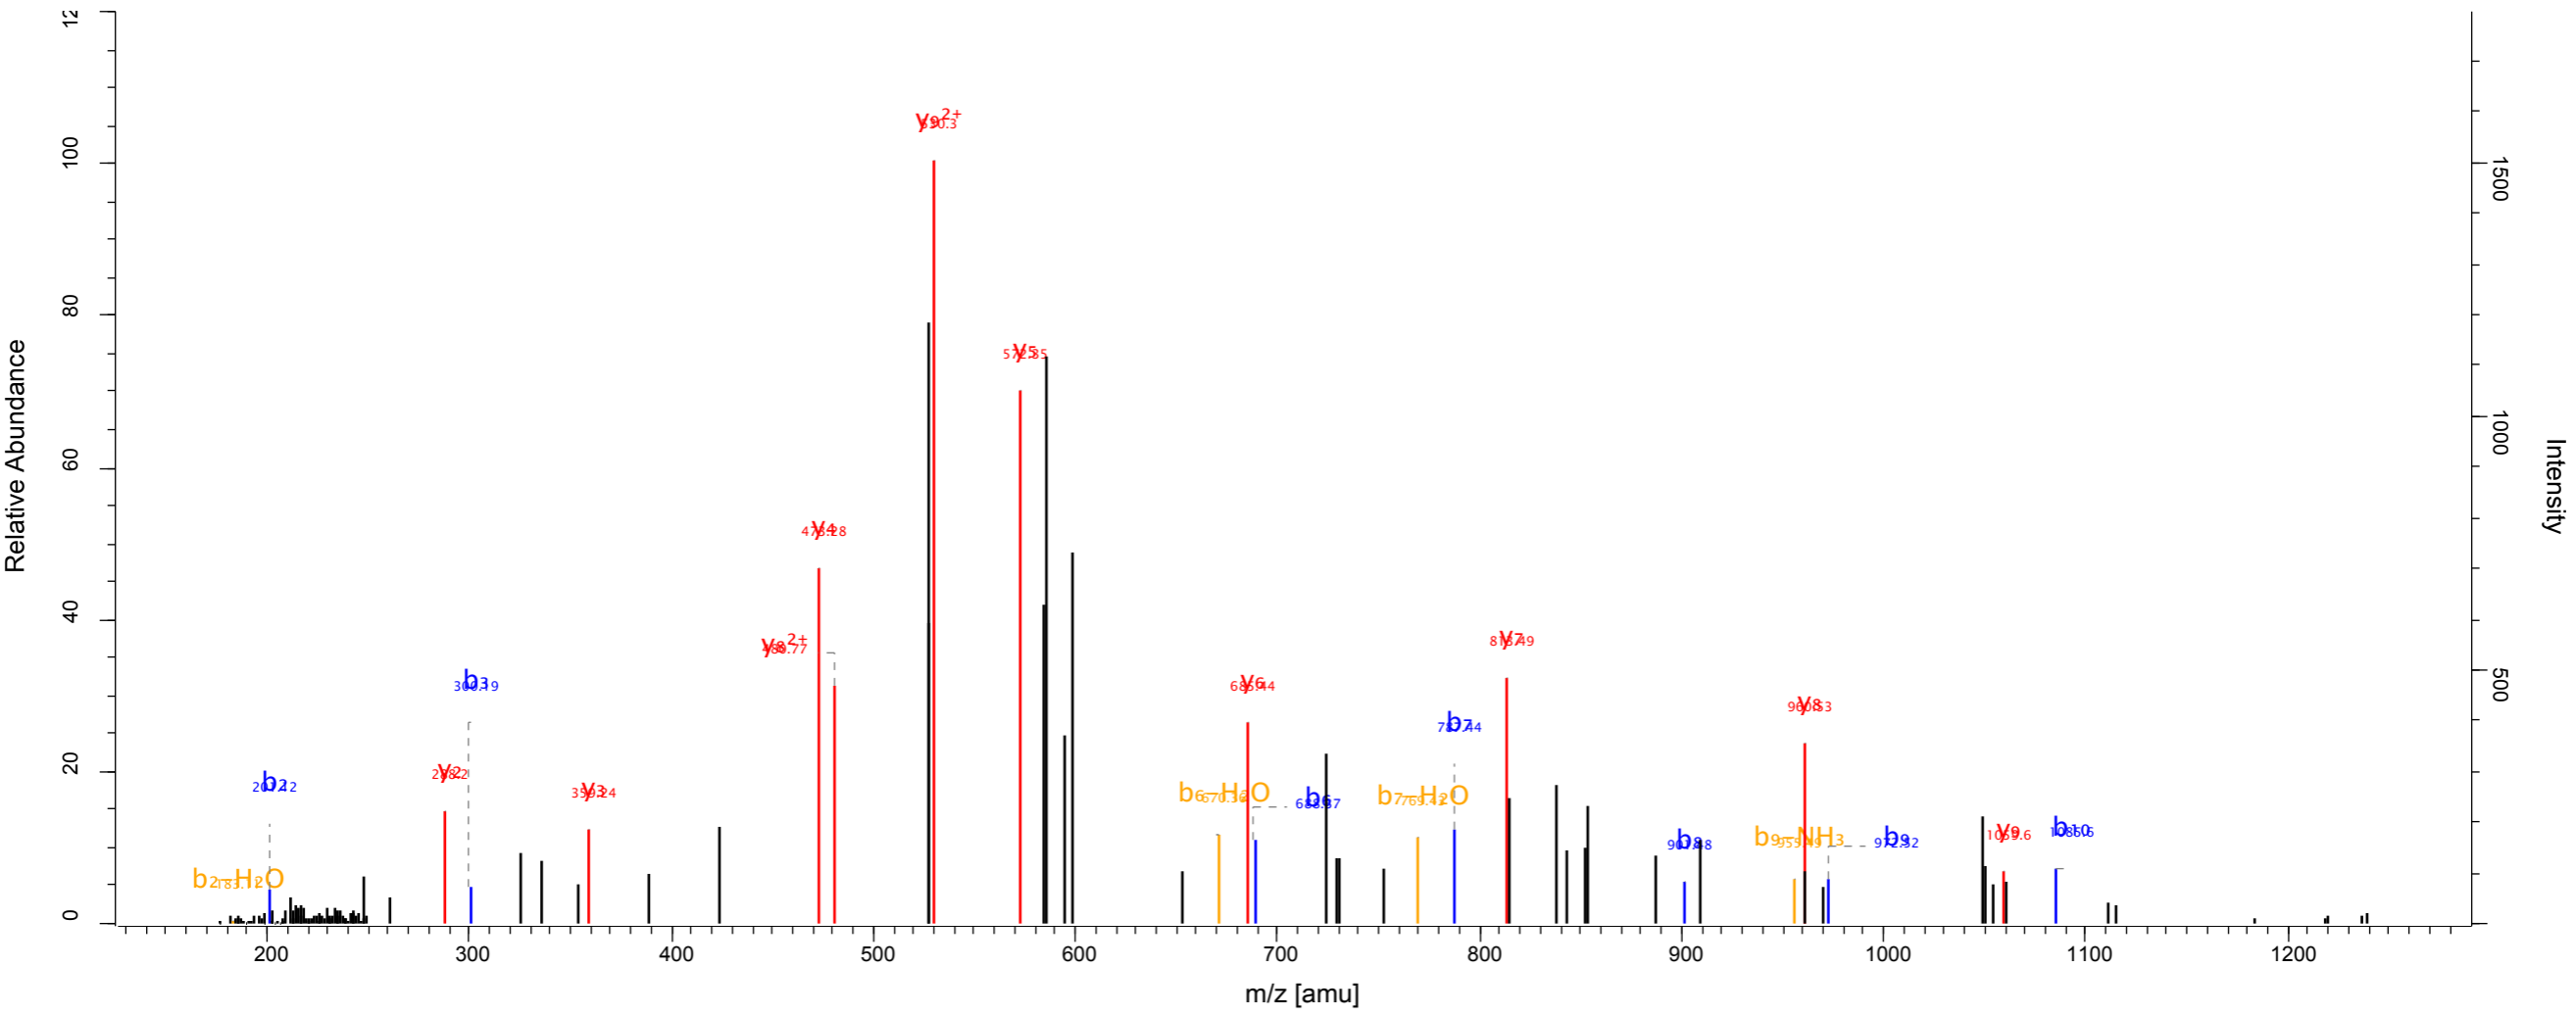

Scan number 9817 Raw file SKaraca\_LMB\_TCE\_Forward\_8\_191011\_rep1  
 Method ITMS; CID Pepti... 141.08

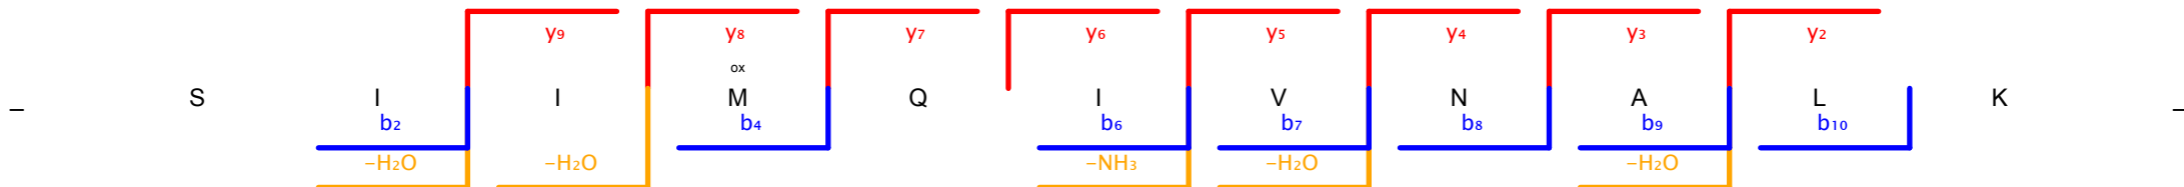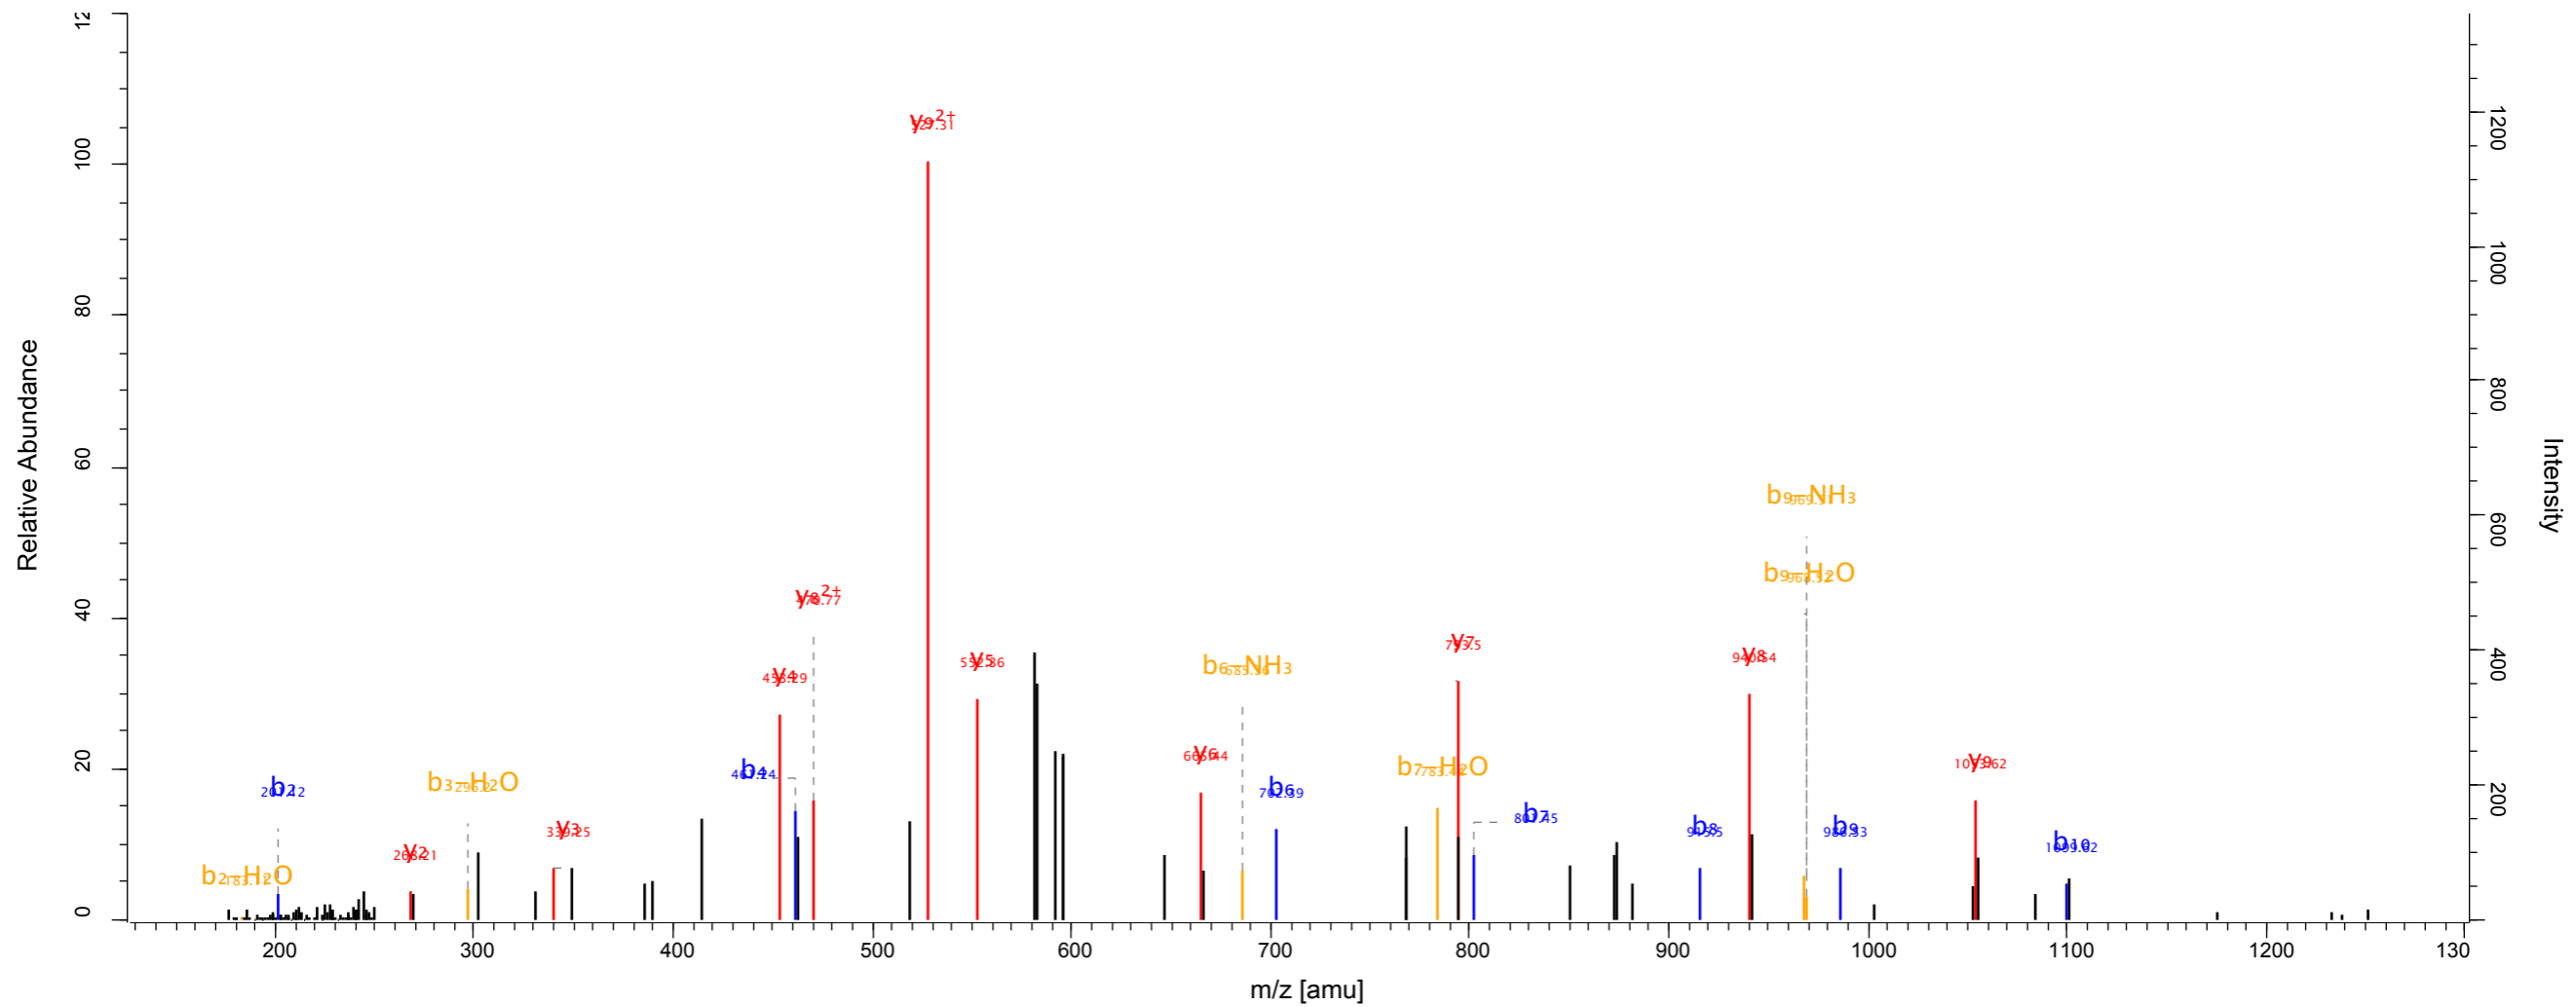



Scan number 1494 Raw file SKaraca\_LMB\_TCE\_Forward\_9\_191011\_rep1  
 Method ITMS; CID Pepti... 92.25

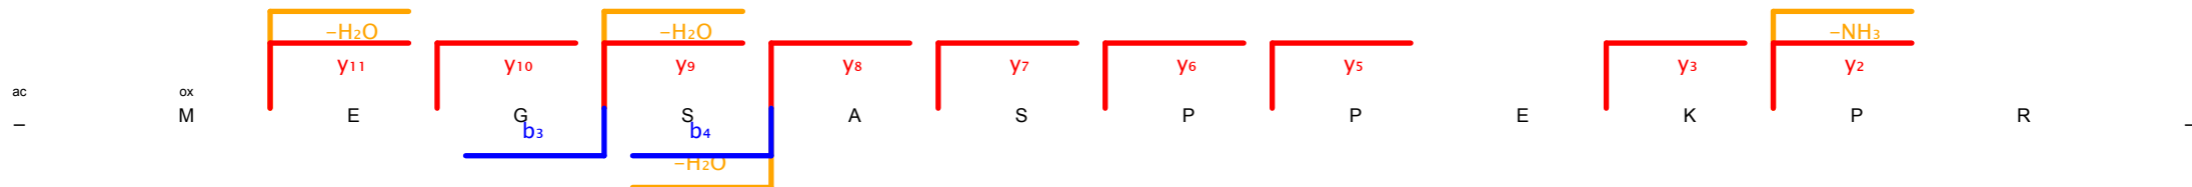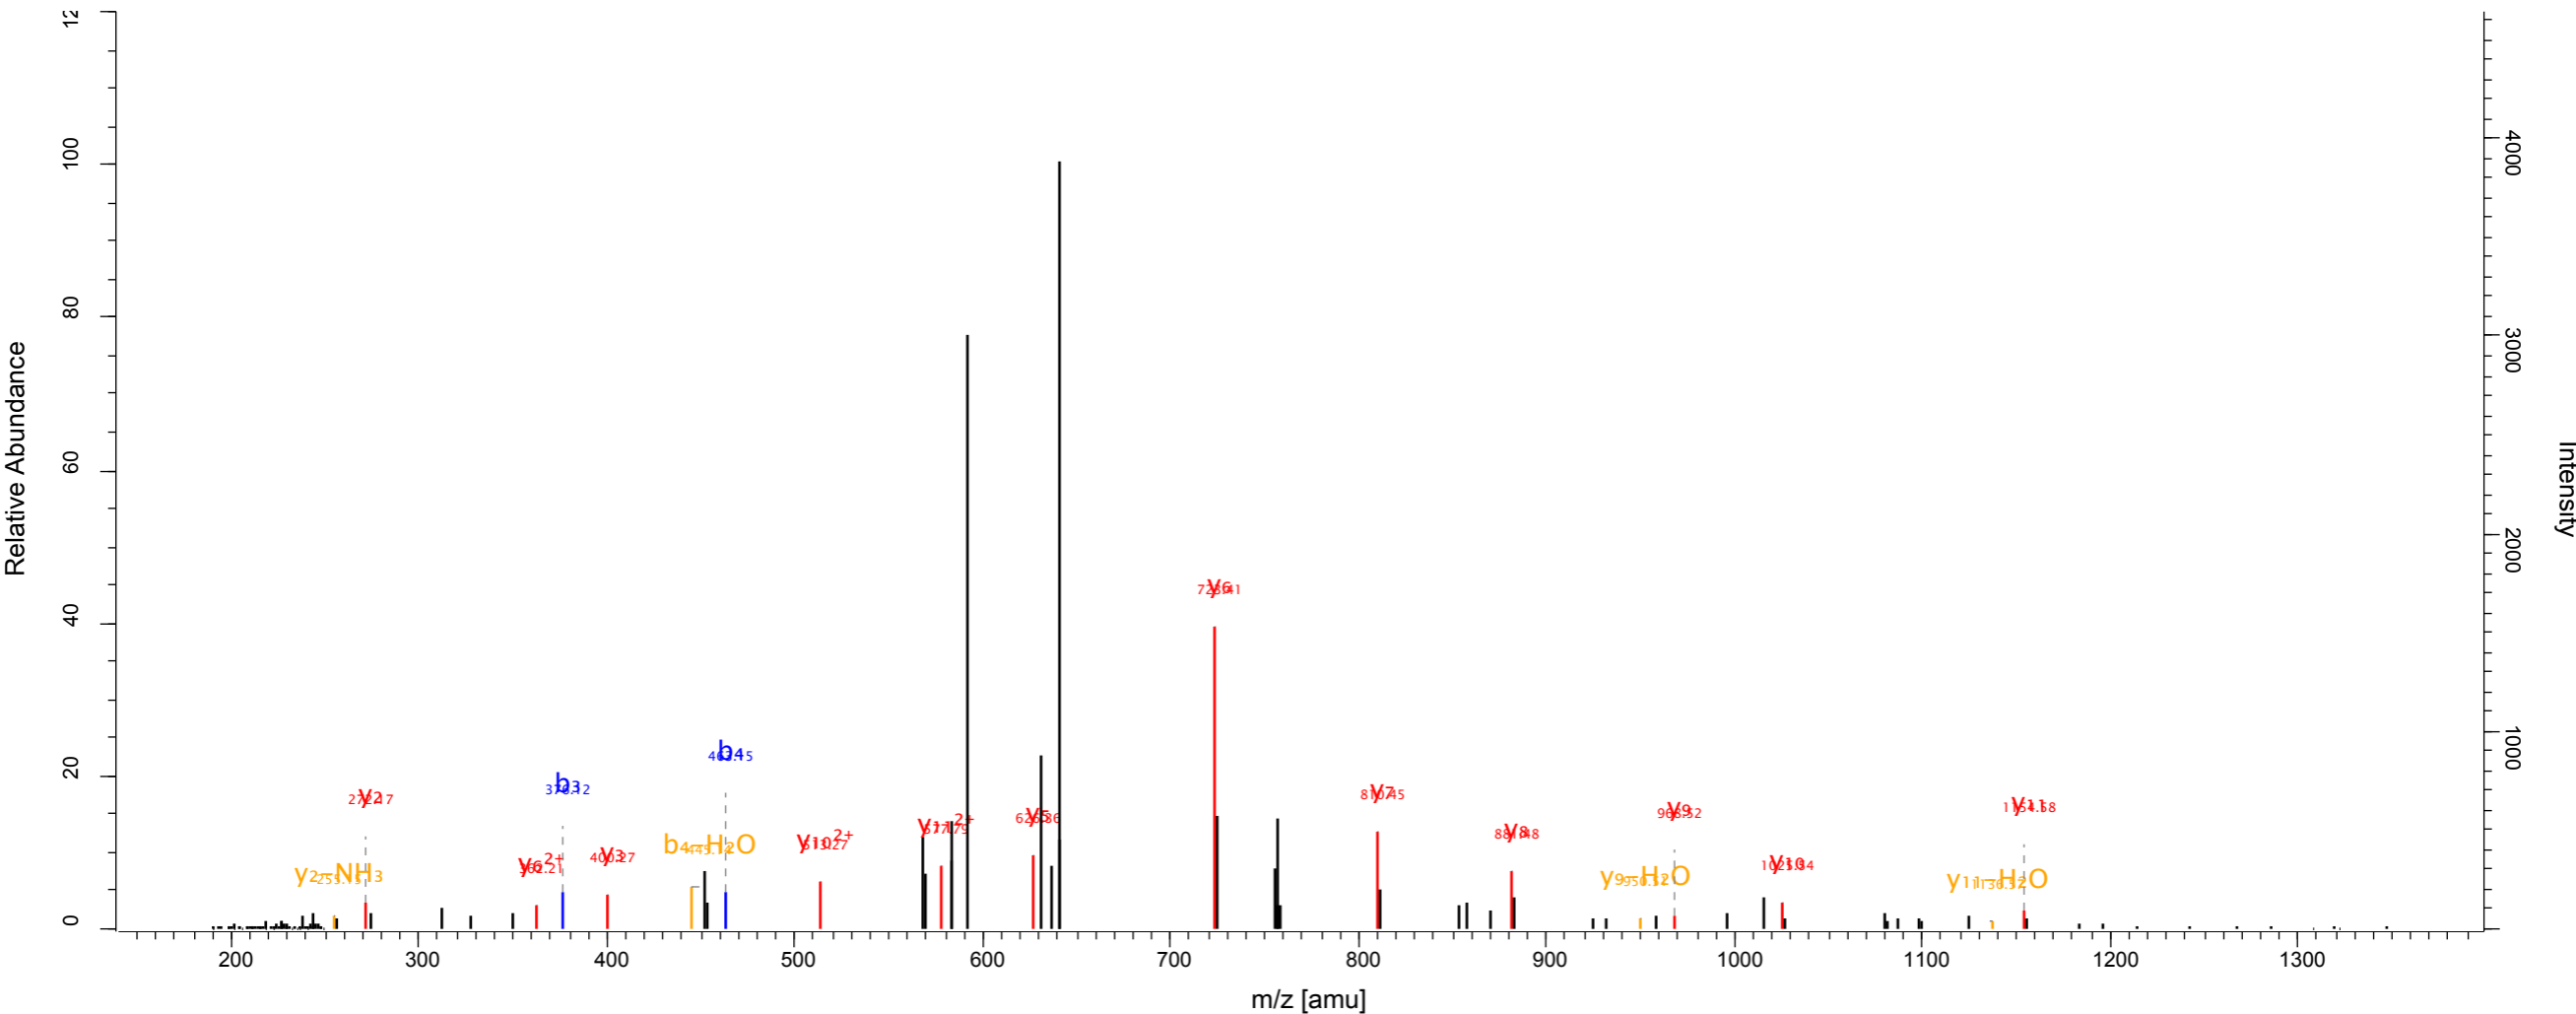

Scan number 6459 Raw file SKaraca\_LMB\_TCE\_Forward\_9\_191011\_rep2  
 Method ITMS; CID Pepti... 182.28

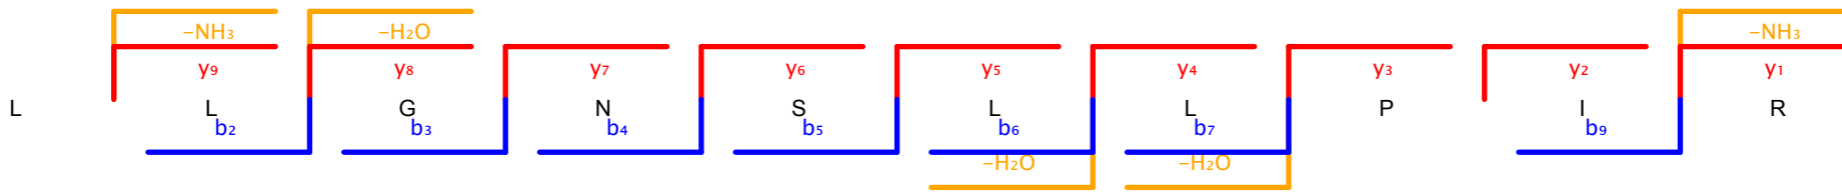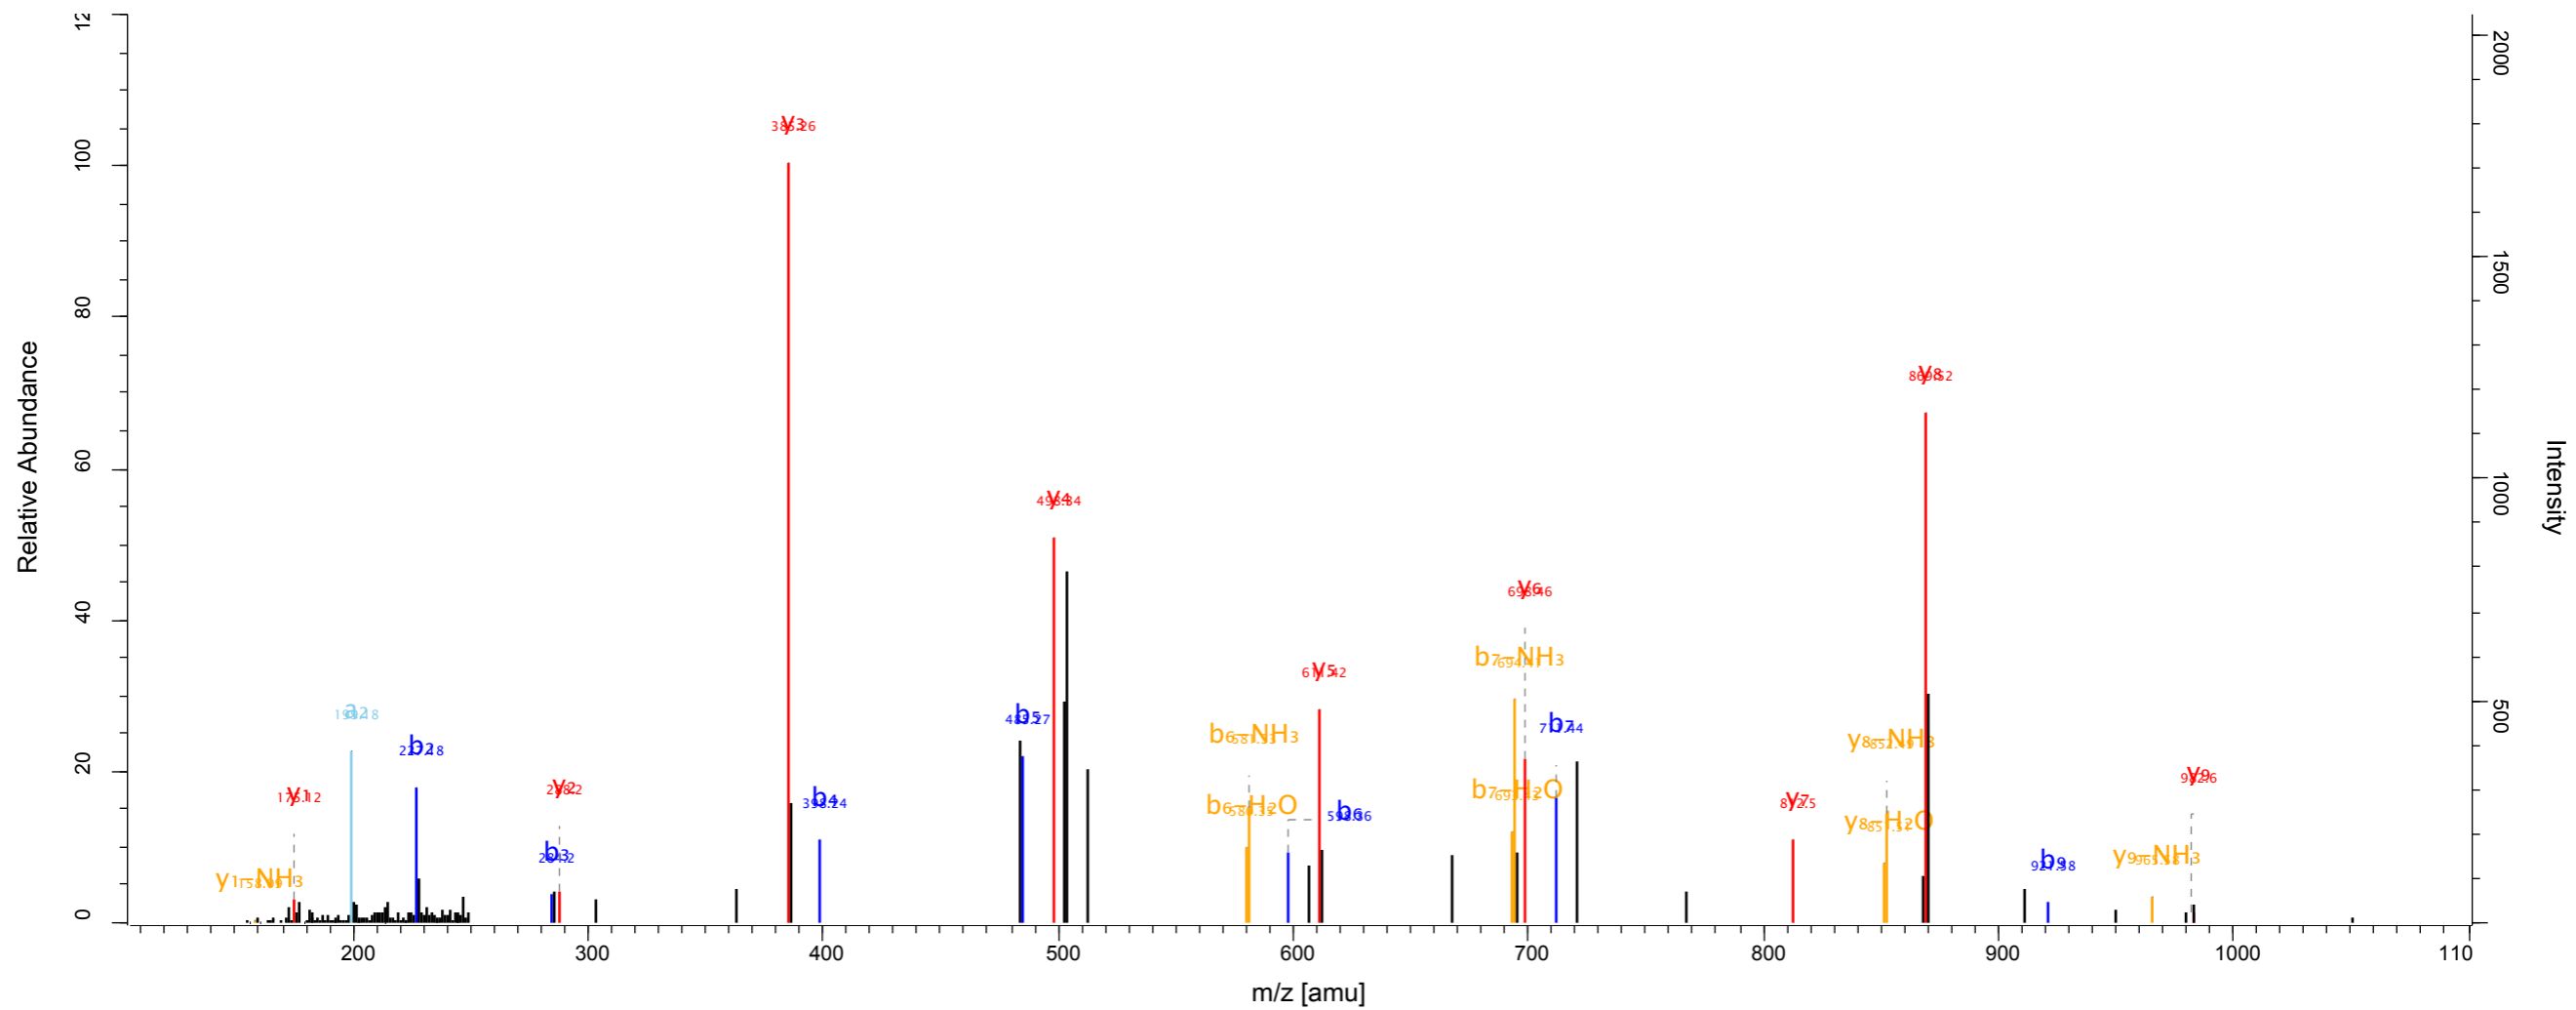

Scan number 5000 Raw file SKaraca\_LMB\_TCE\_Forward\_9\_191011\_rep3  
 Method ITMS; CID Pepti... 113.99

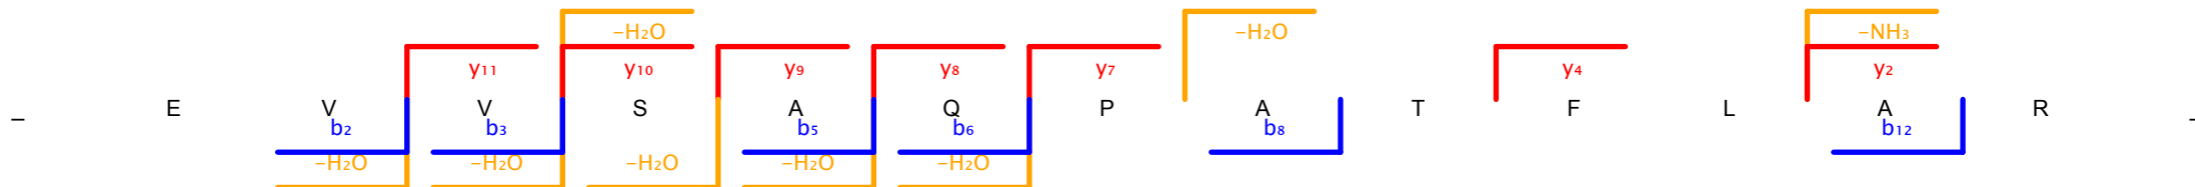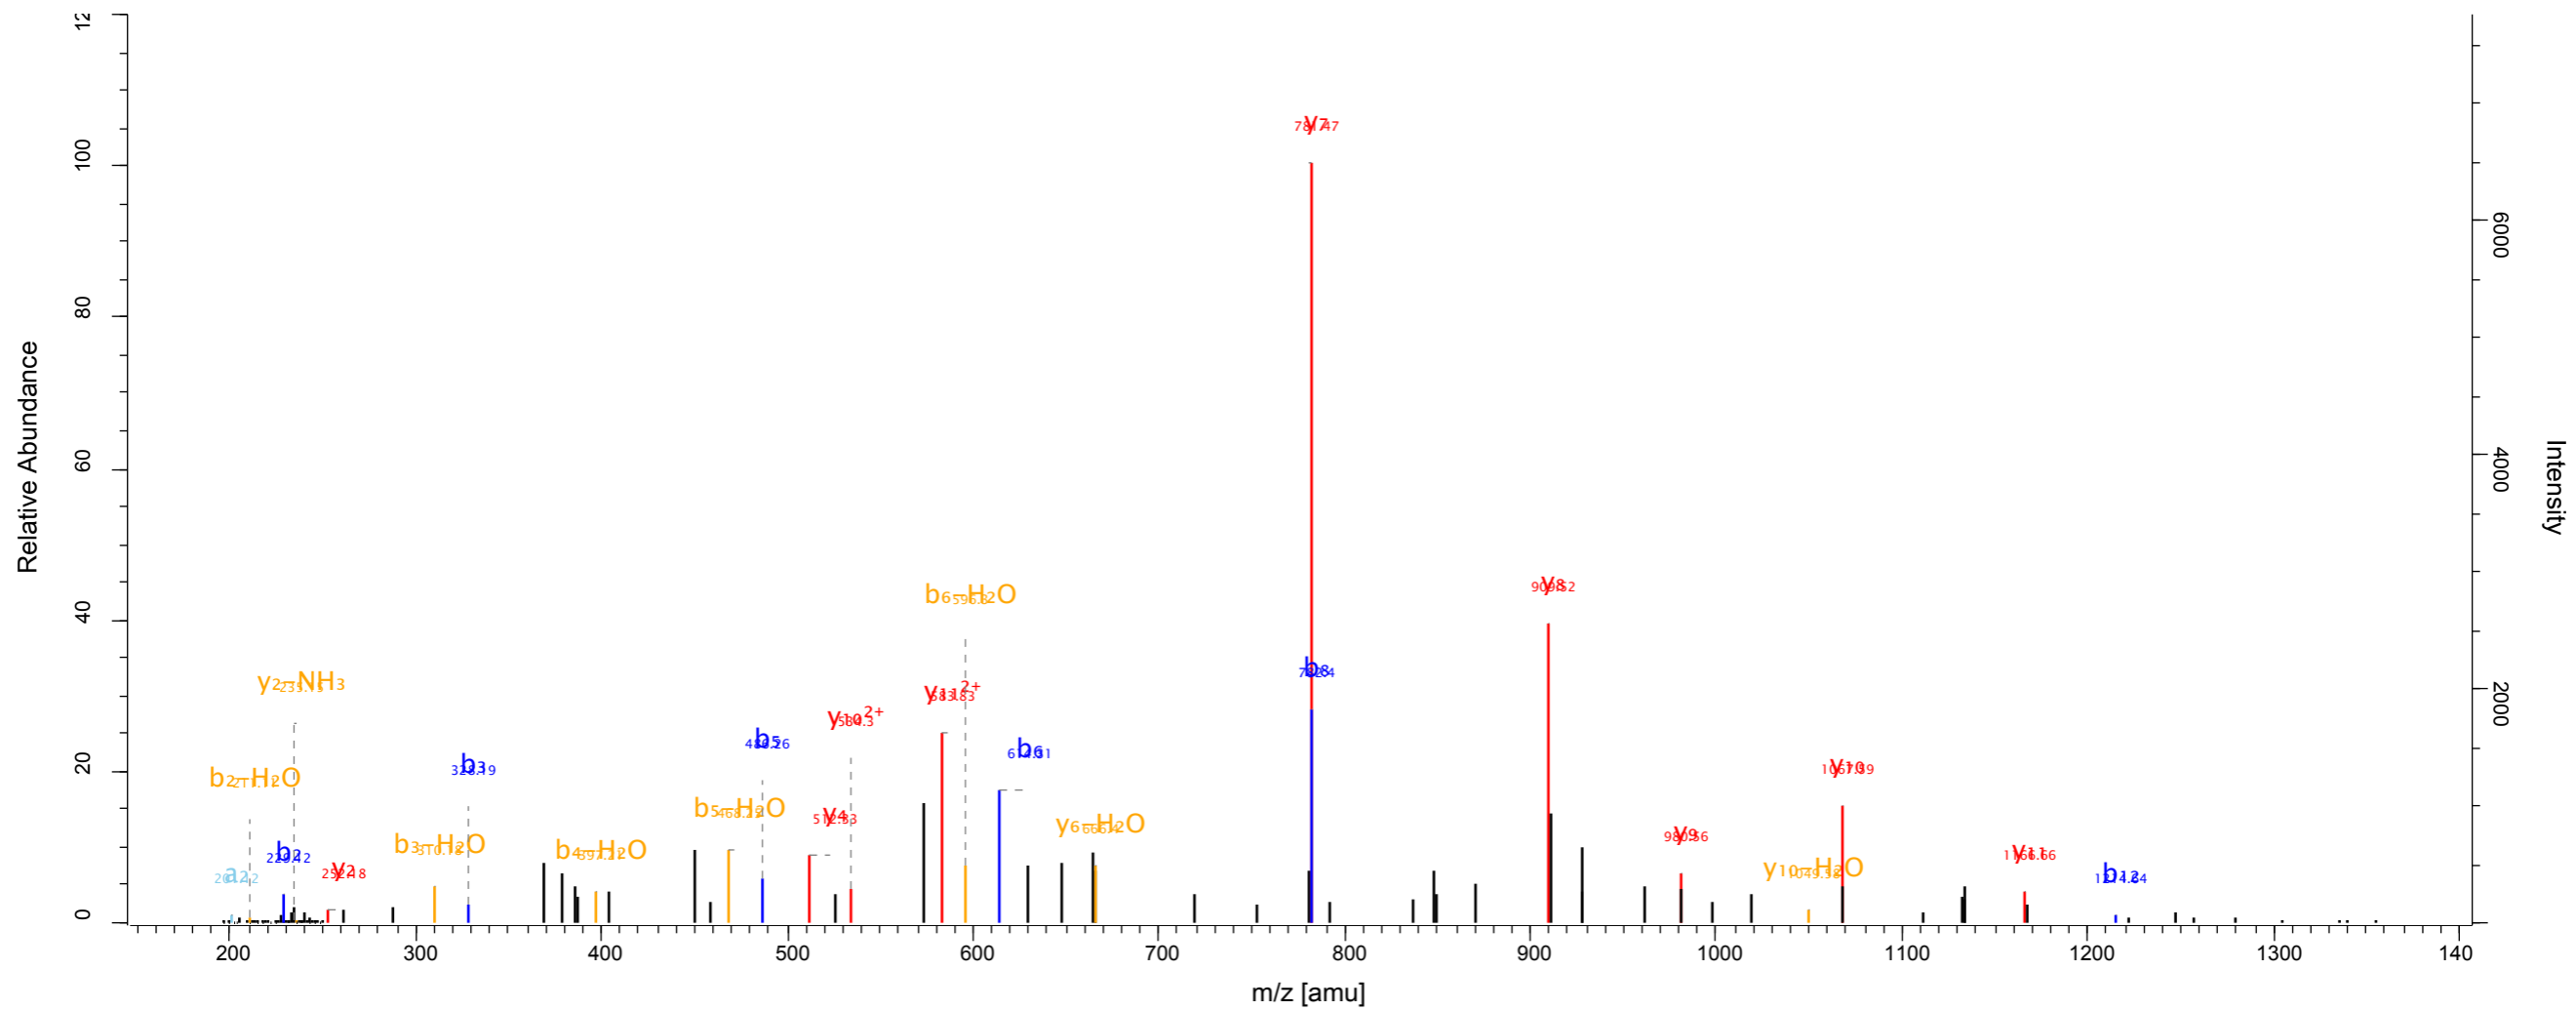

Scan number 9604 Raw file SKaraca\_LMB\_TCE\_Reverse\_241011\_10\_rep1  
 Method ITMS; CID Pepti... 94.88

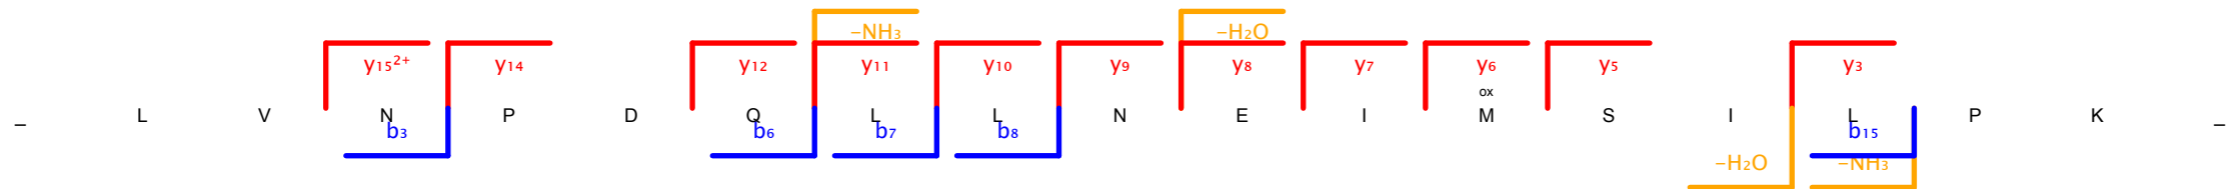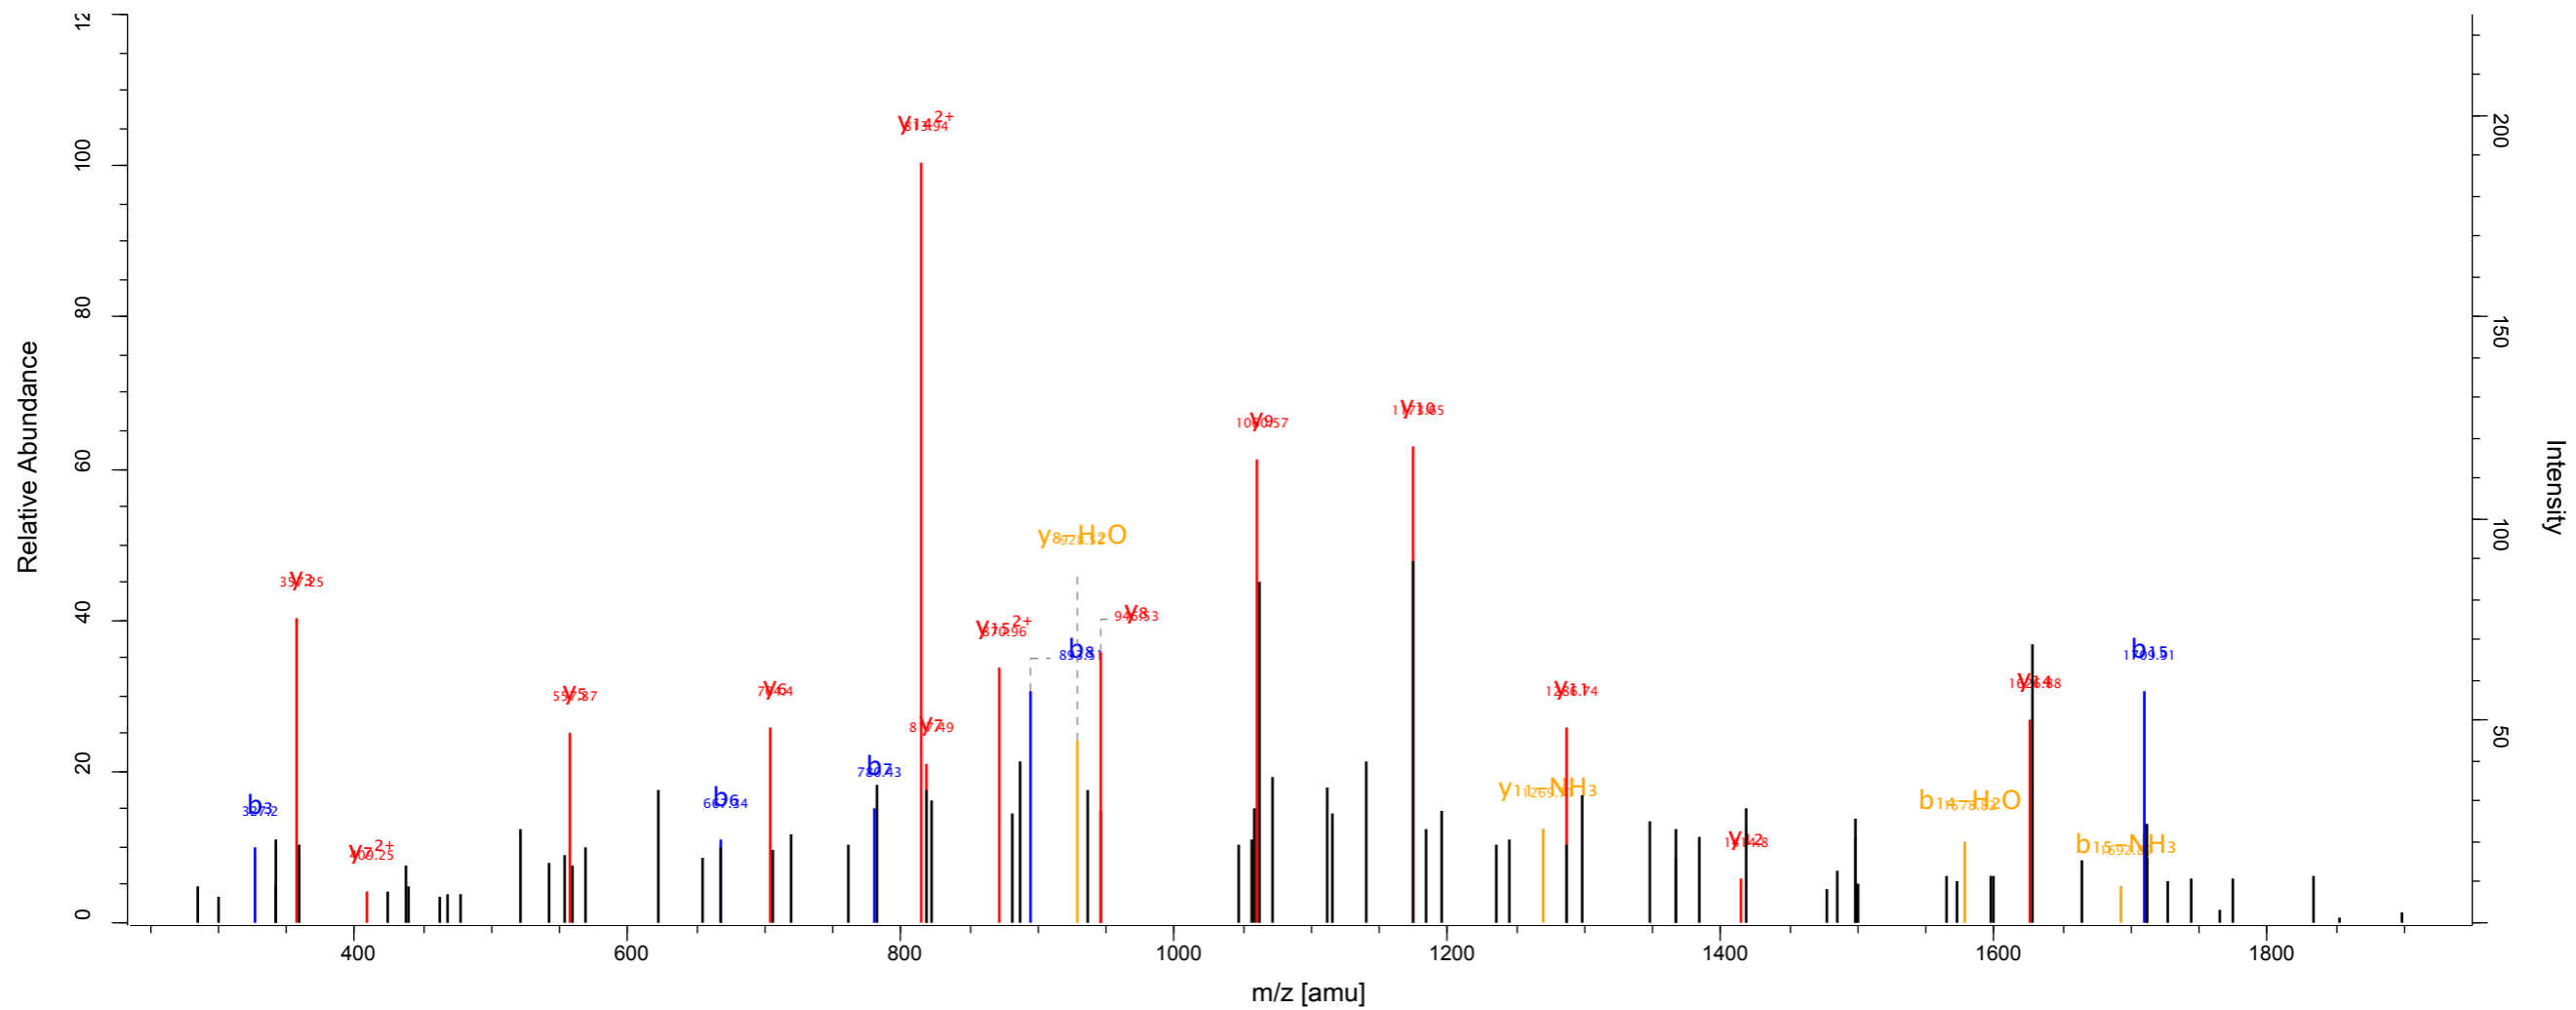

|             |           |          |                                        |
|-------------|-----------|----------|----------------------------------------|
| Scan number | 1281      | Raw file | SKaraca_LMB_TCE_Reverse_241011_11_rep1 |
| Method      | ITMS; CID | Pepti... | 128.36                                 |

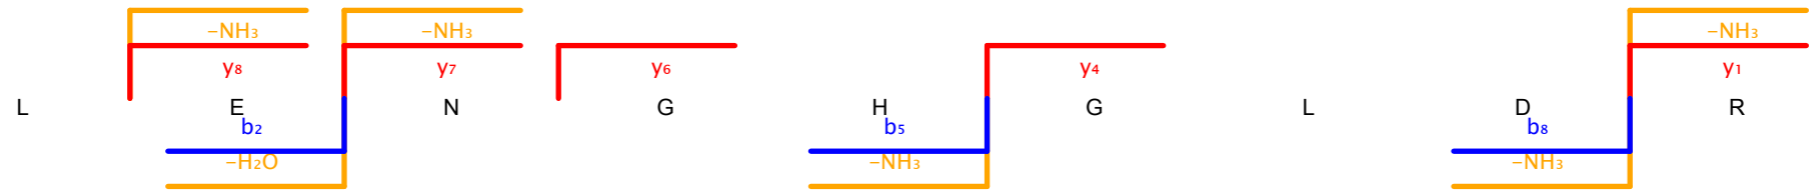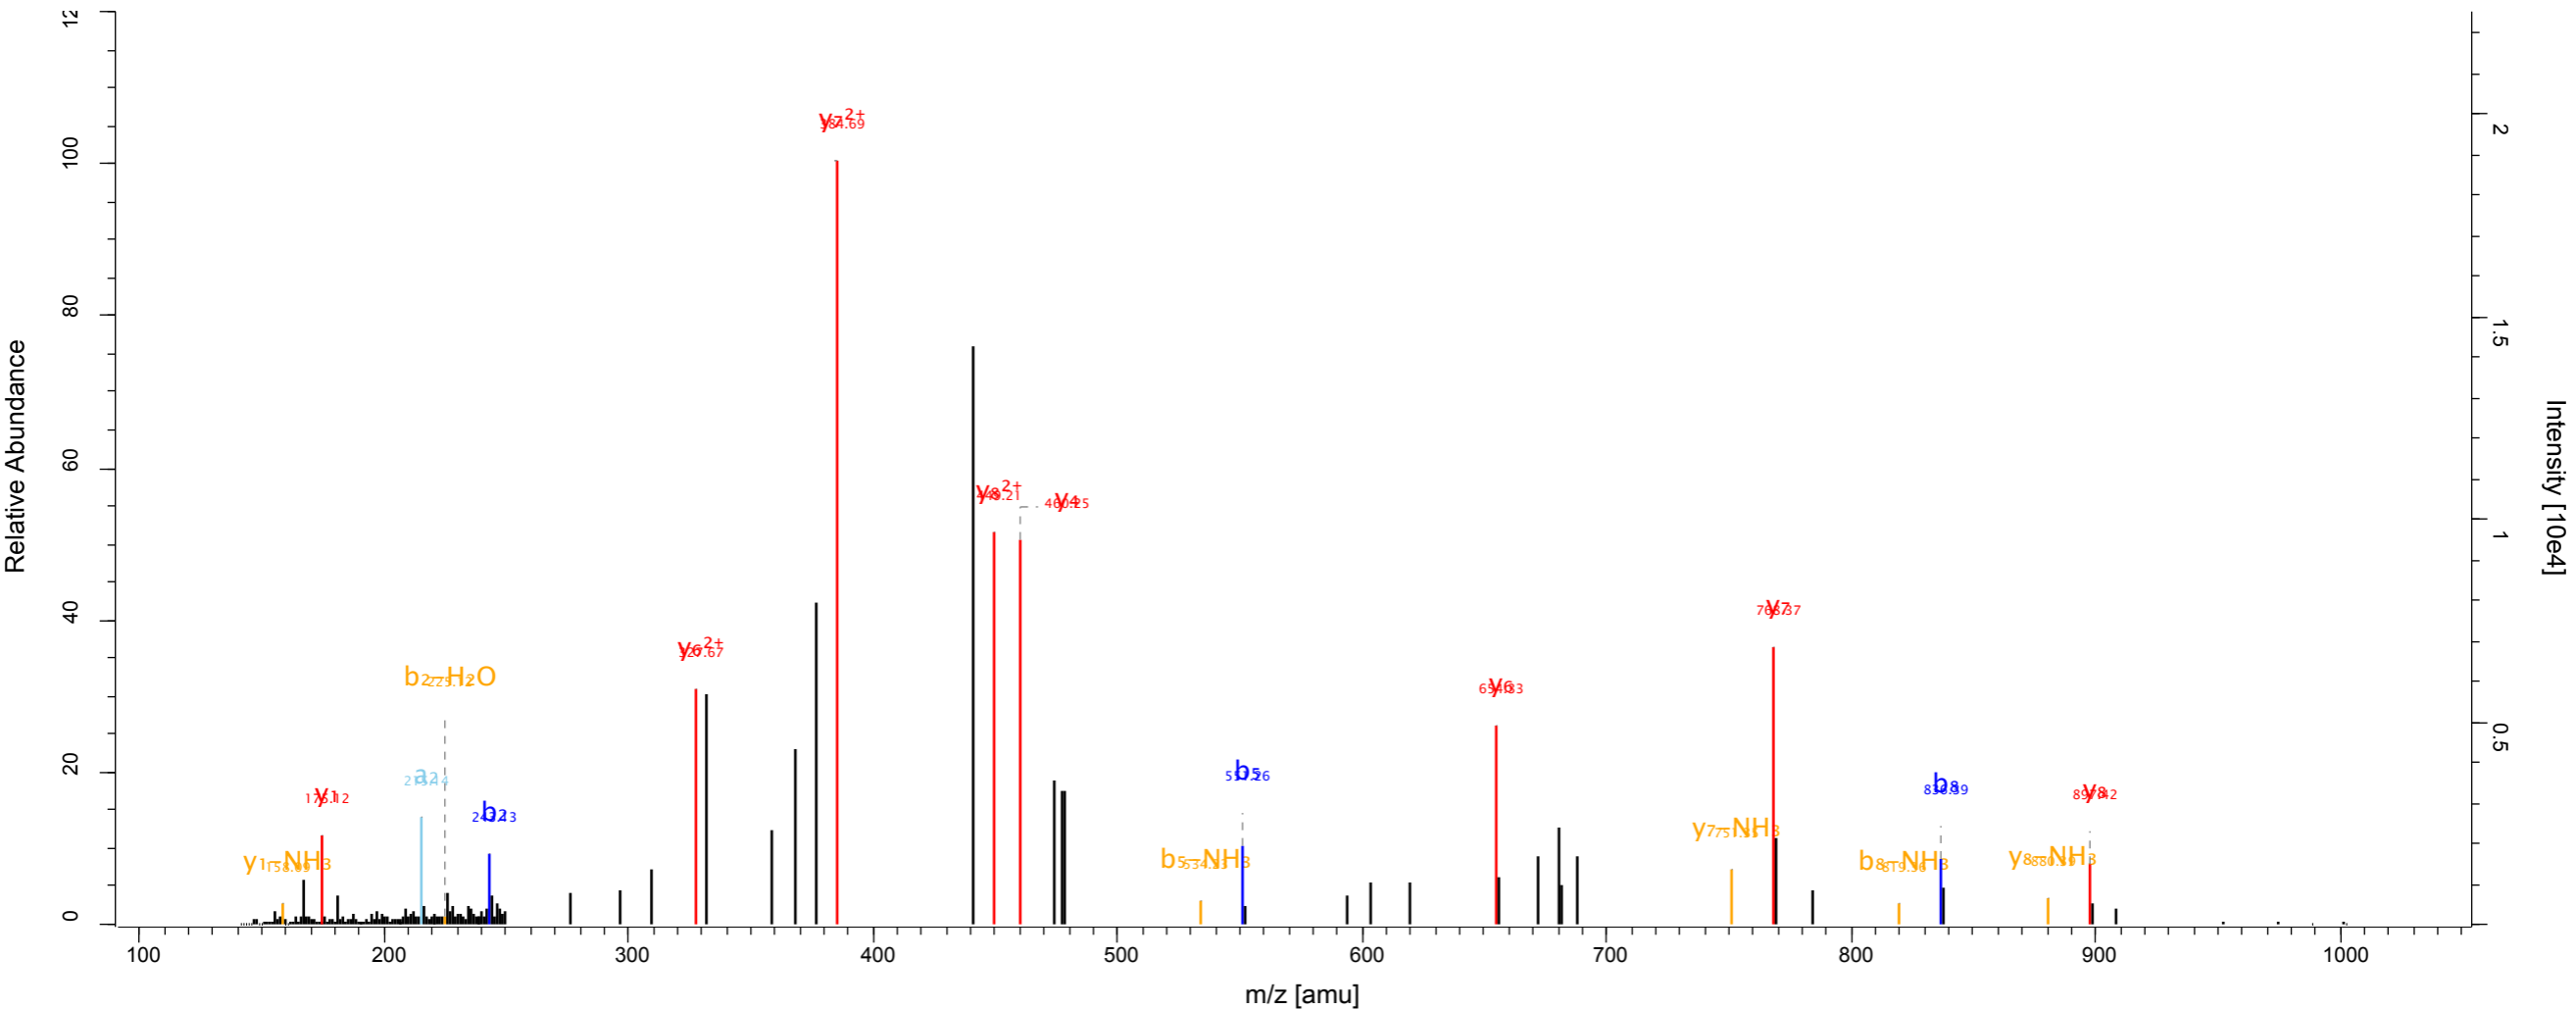

Scan number 4048 Raw file SKaraca\_LMB\_TCE\_Reverse\_241011\_11\_rep1  
 Method ITMS; CID Pepti... 117.2

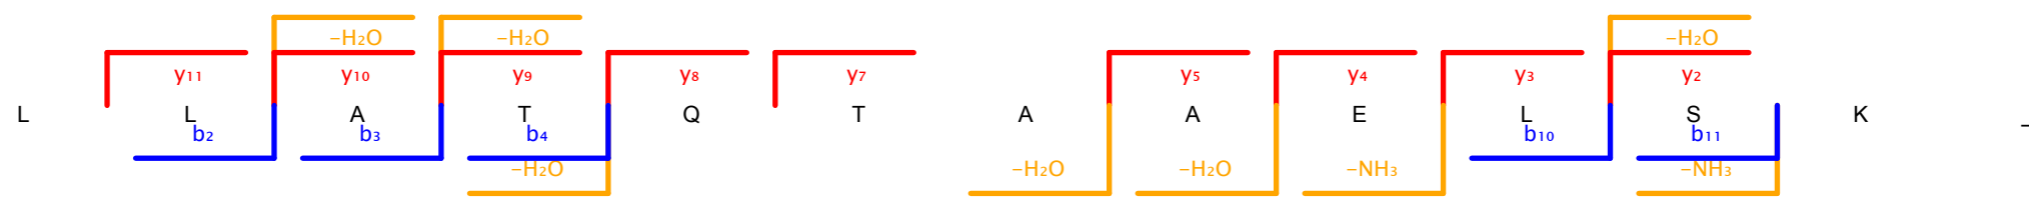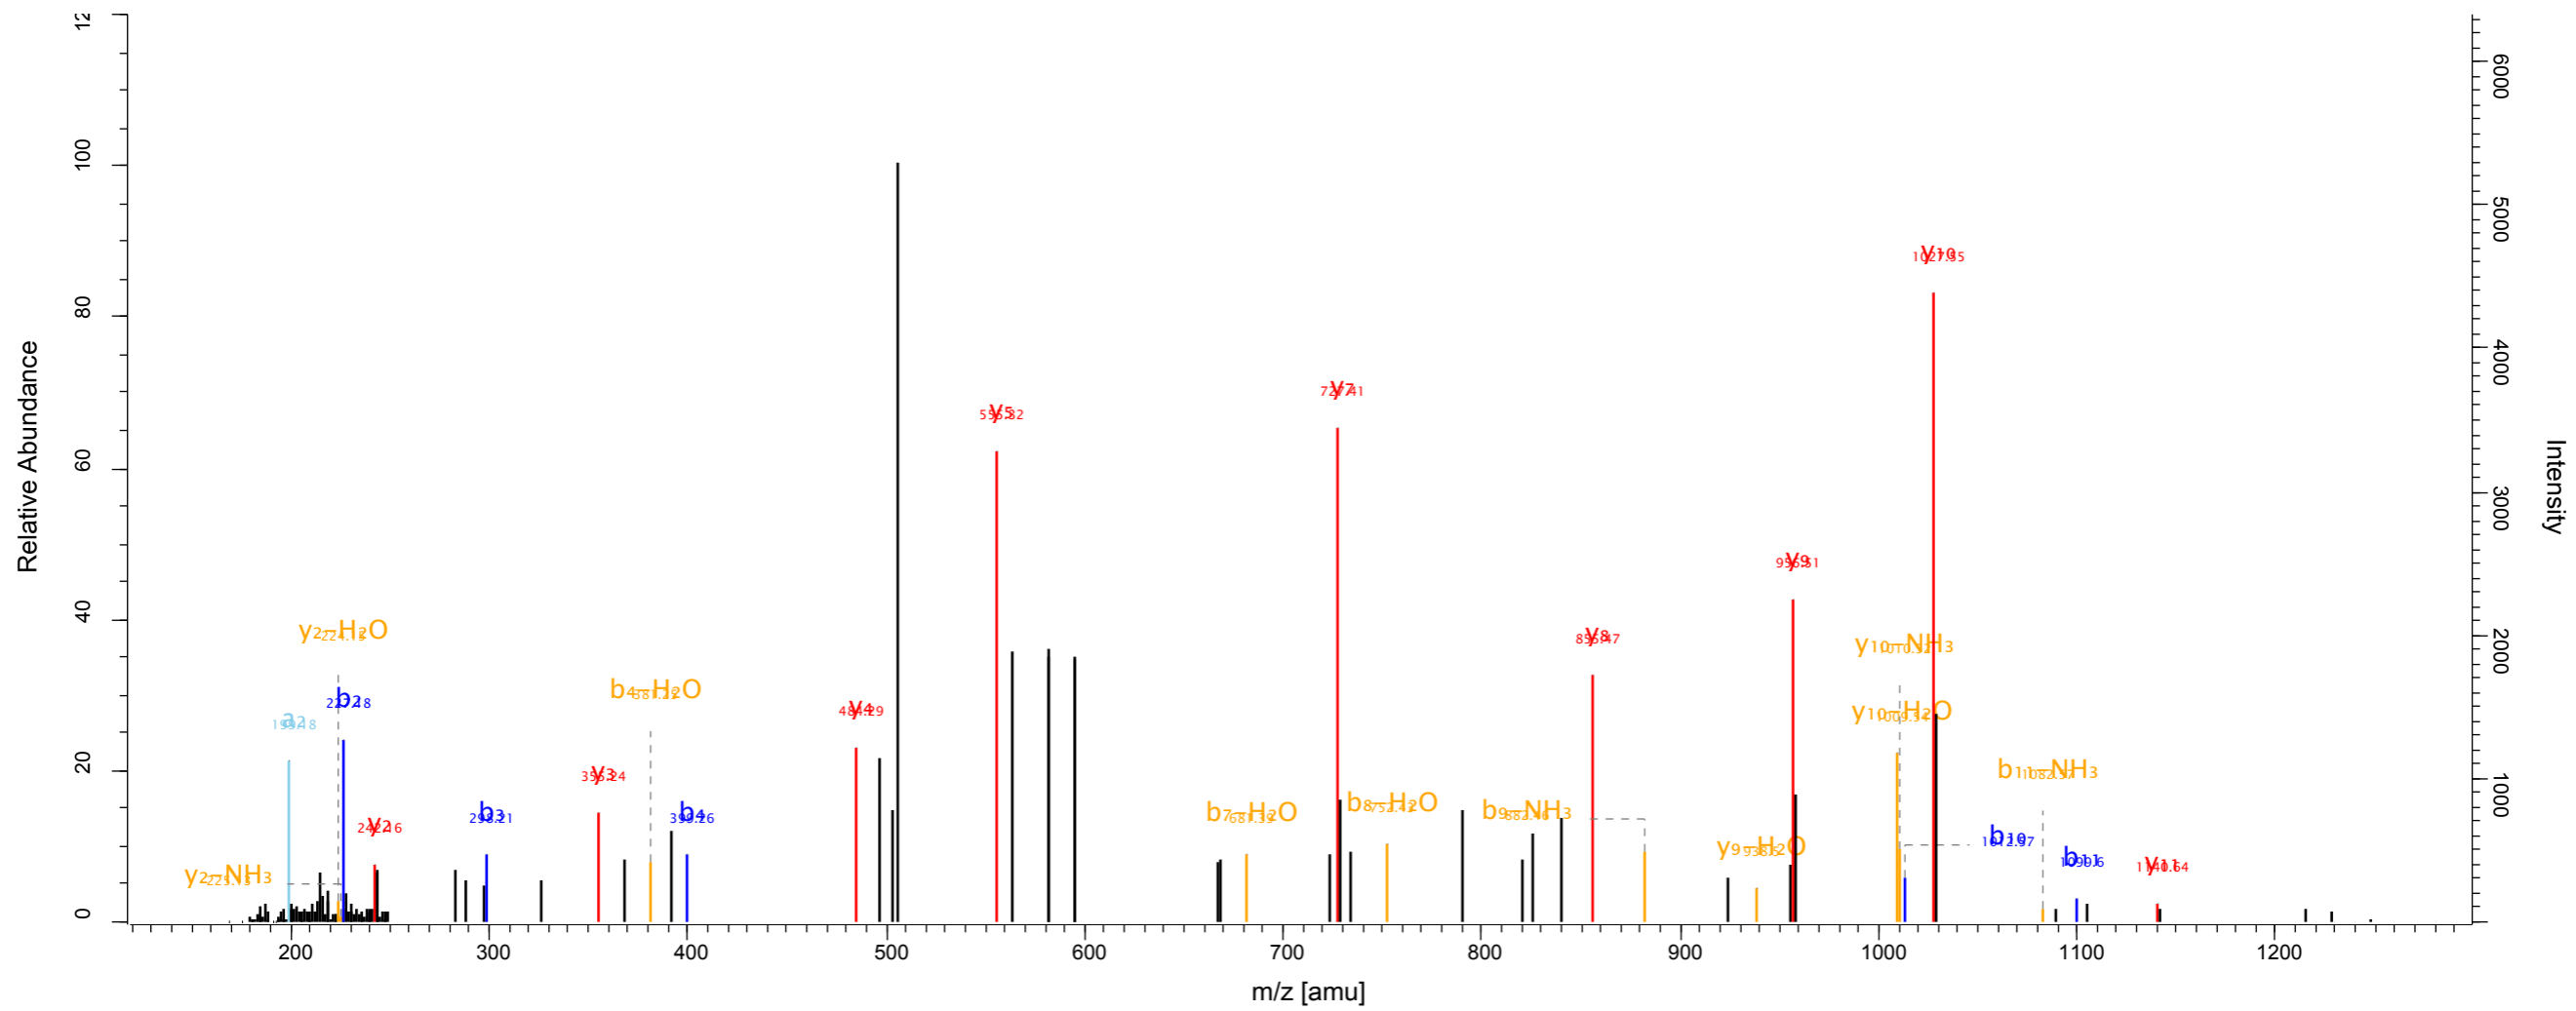

|             |           |          |                                        |
|-------------|-----------|----------|----------------------------------------|
| Scan number | 4213      | Raw file | SKaraca_LMB_TCE_Reverse_241011_11_rep2 |
| Method      | ITMS; CID | Pepti... | 137.95                                 |

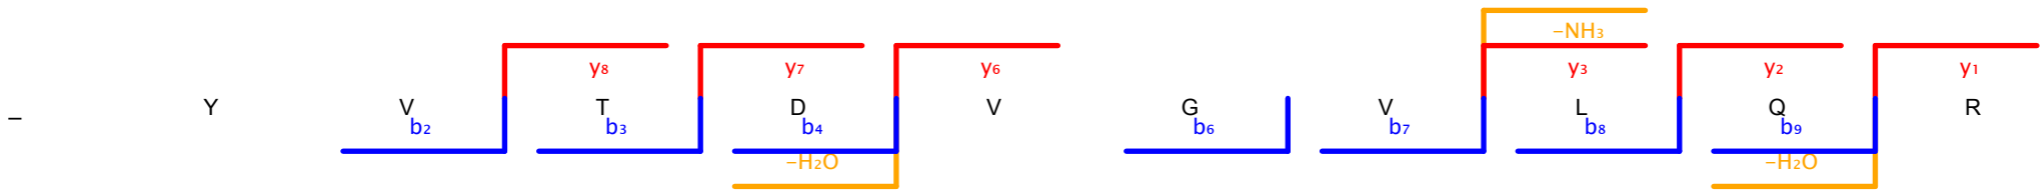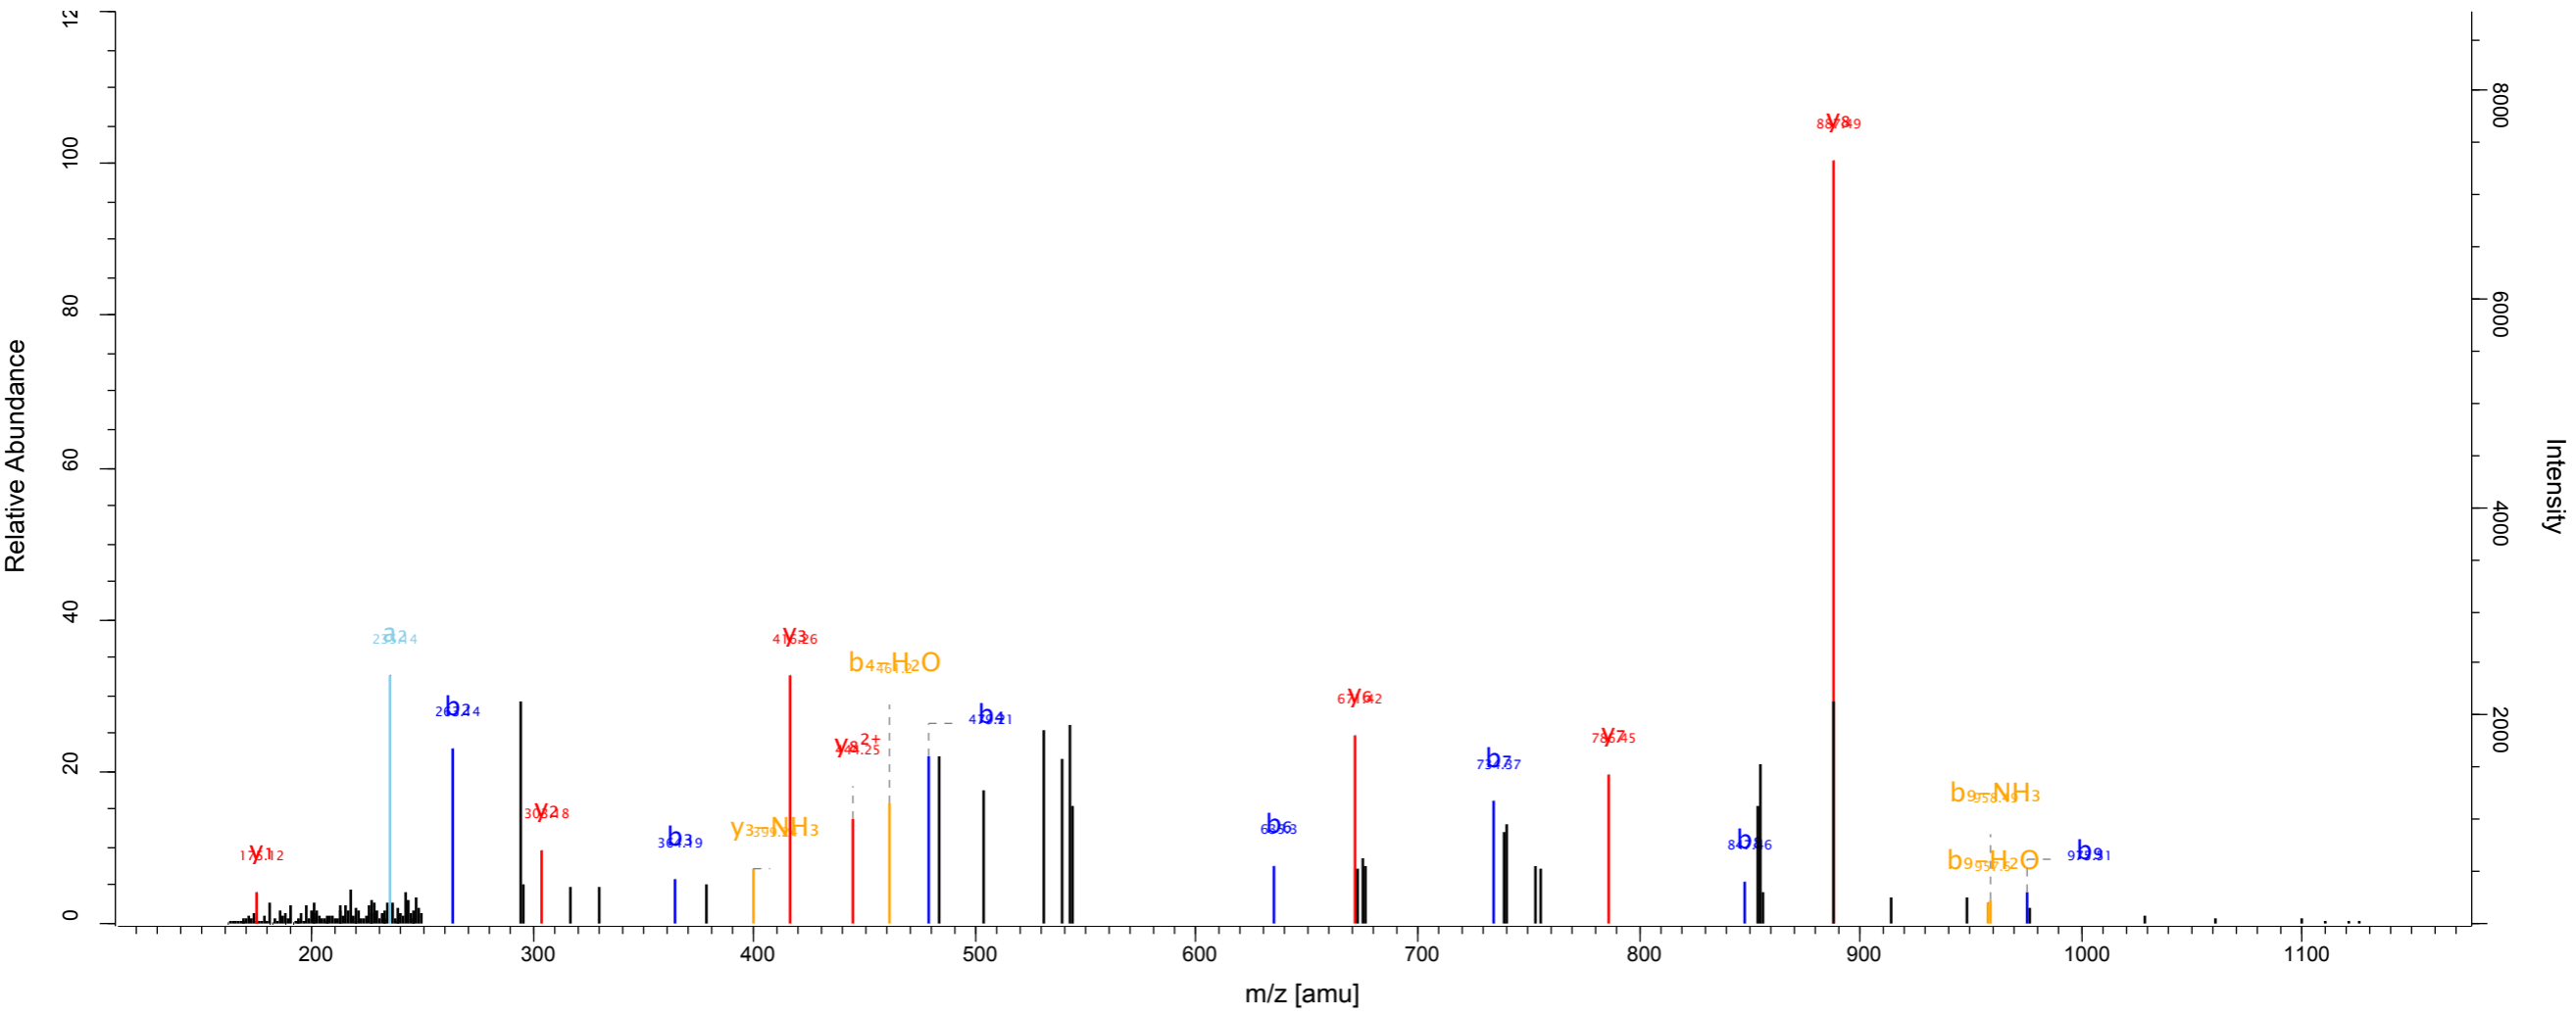

Scan number 7232 Raw file SKaraca\_LMB\_TCE\_Reverse\_241011\_11\_rep2  
 Method ITMS; CID Pepti... 155.48

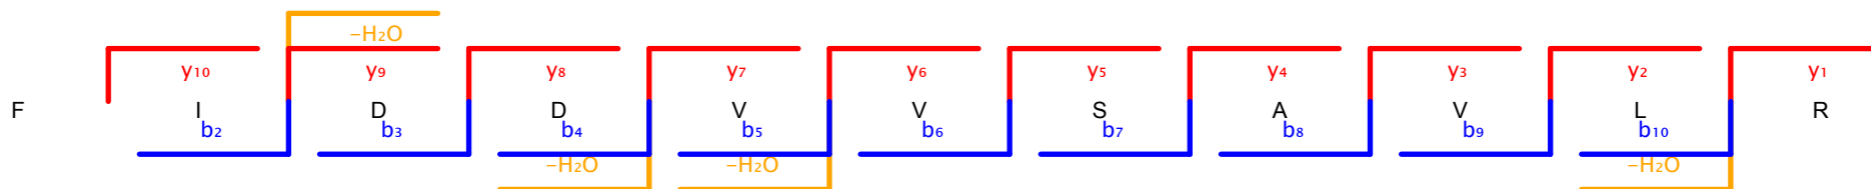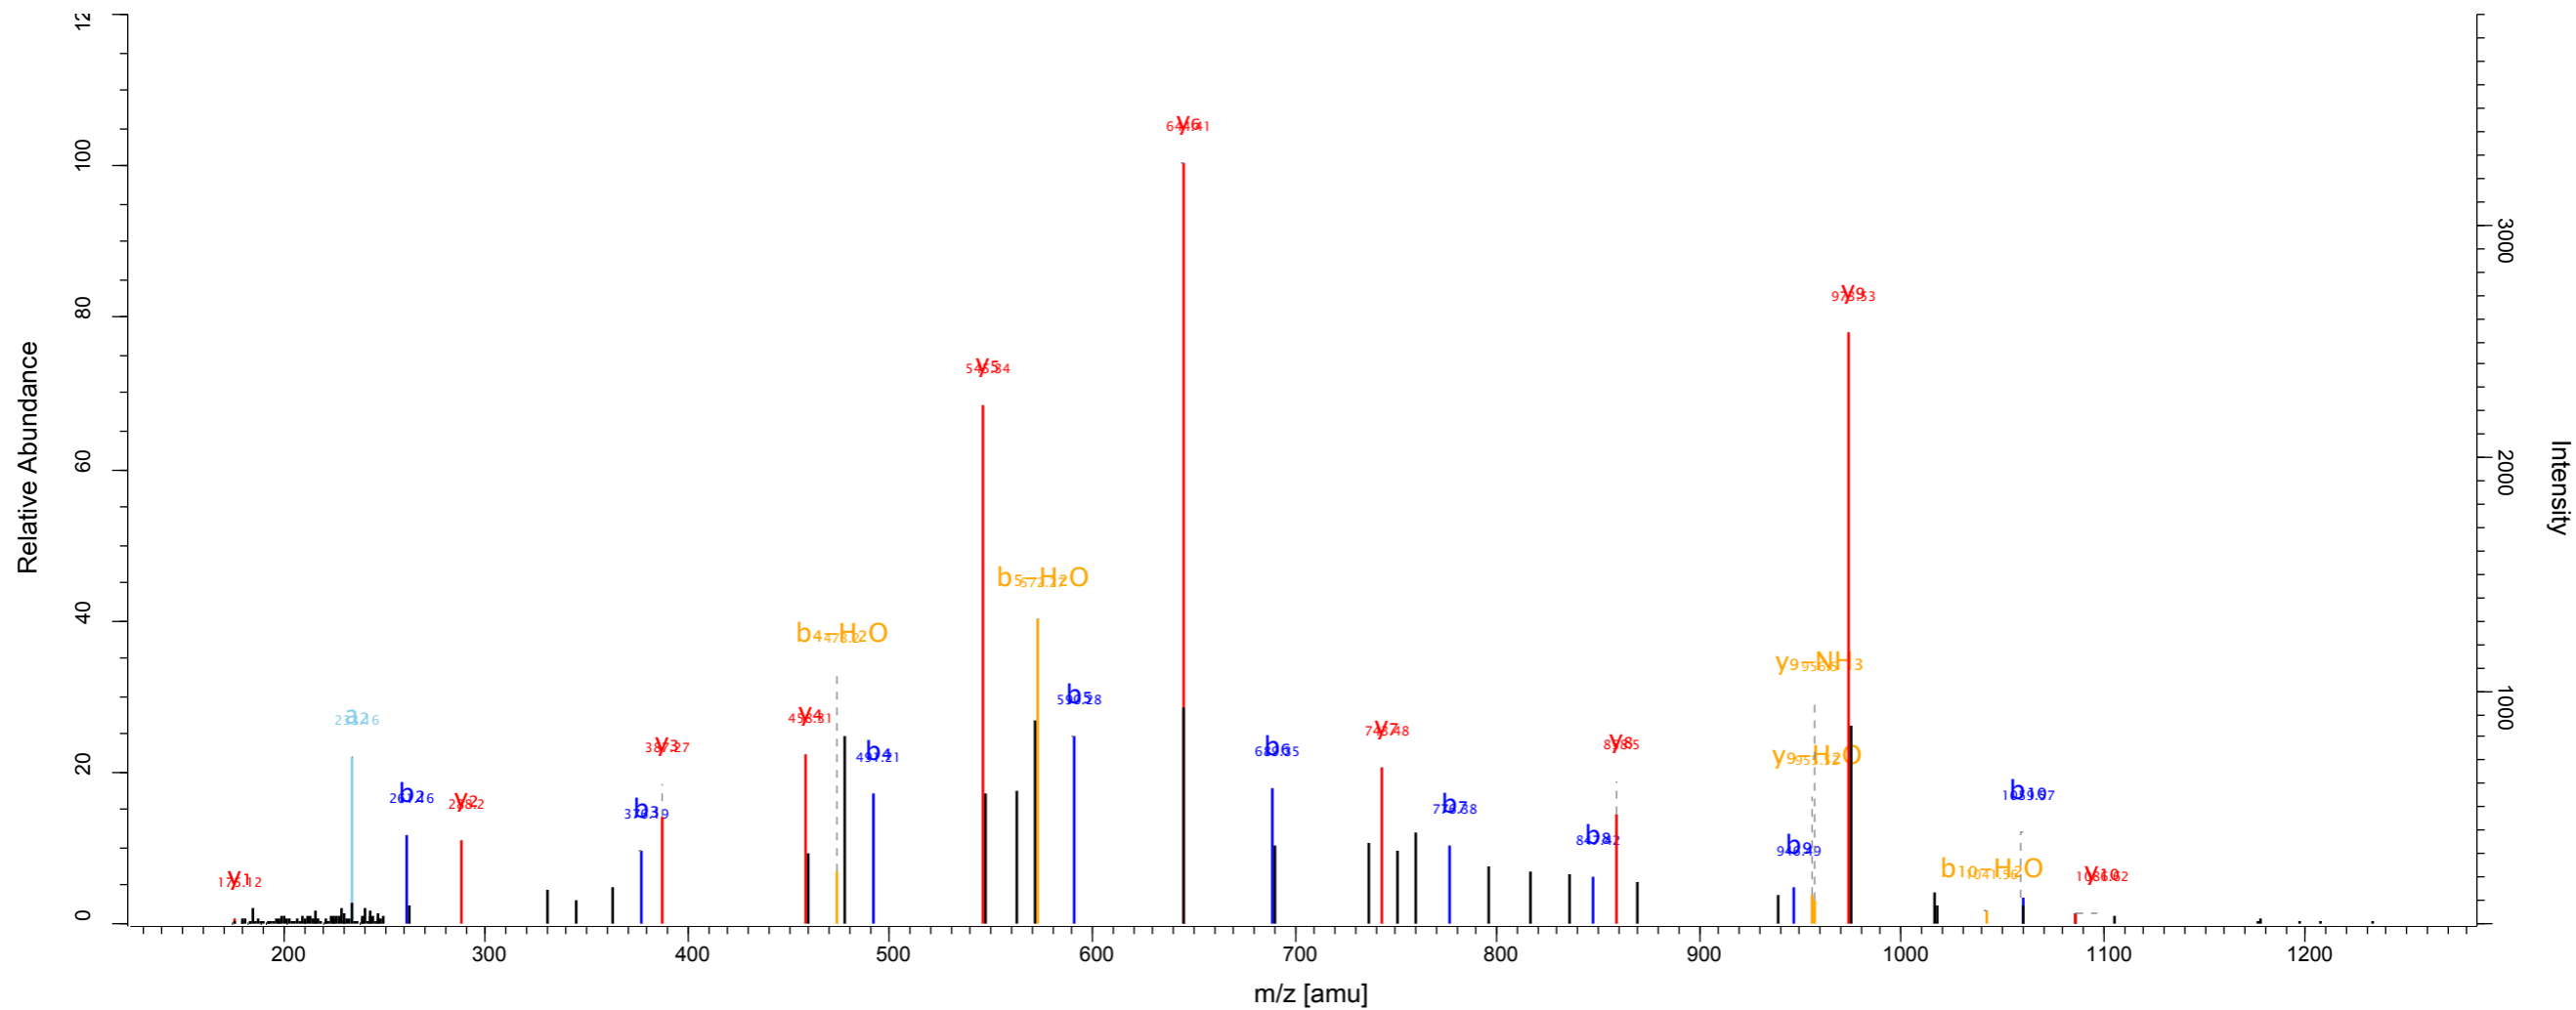



Scan number 8595 Raw file SKaraca\_LMB\_TCE\_Reverse\_241011\_12\_rep2  
 Method ITMS; CID Pepti... 130.41

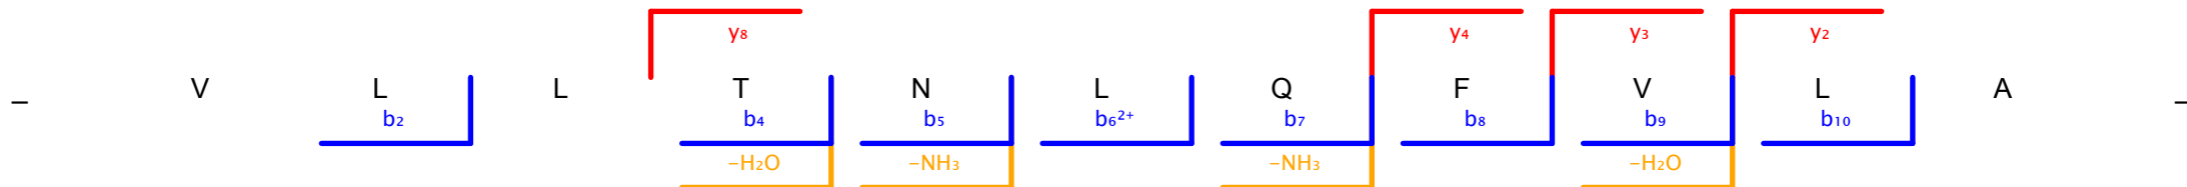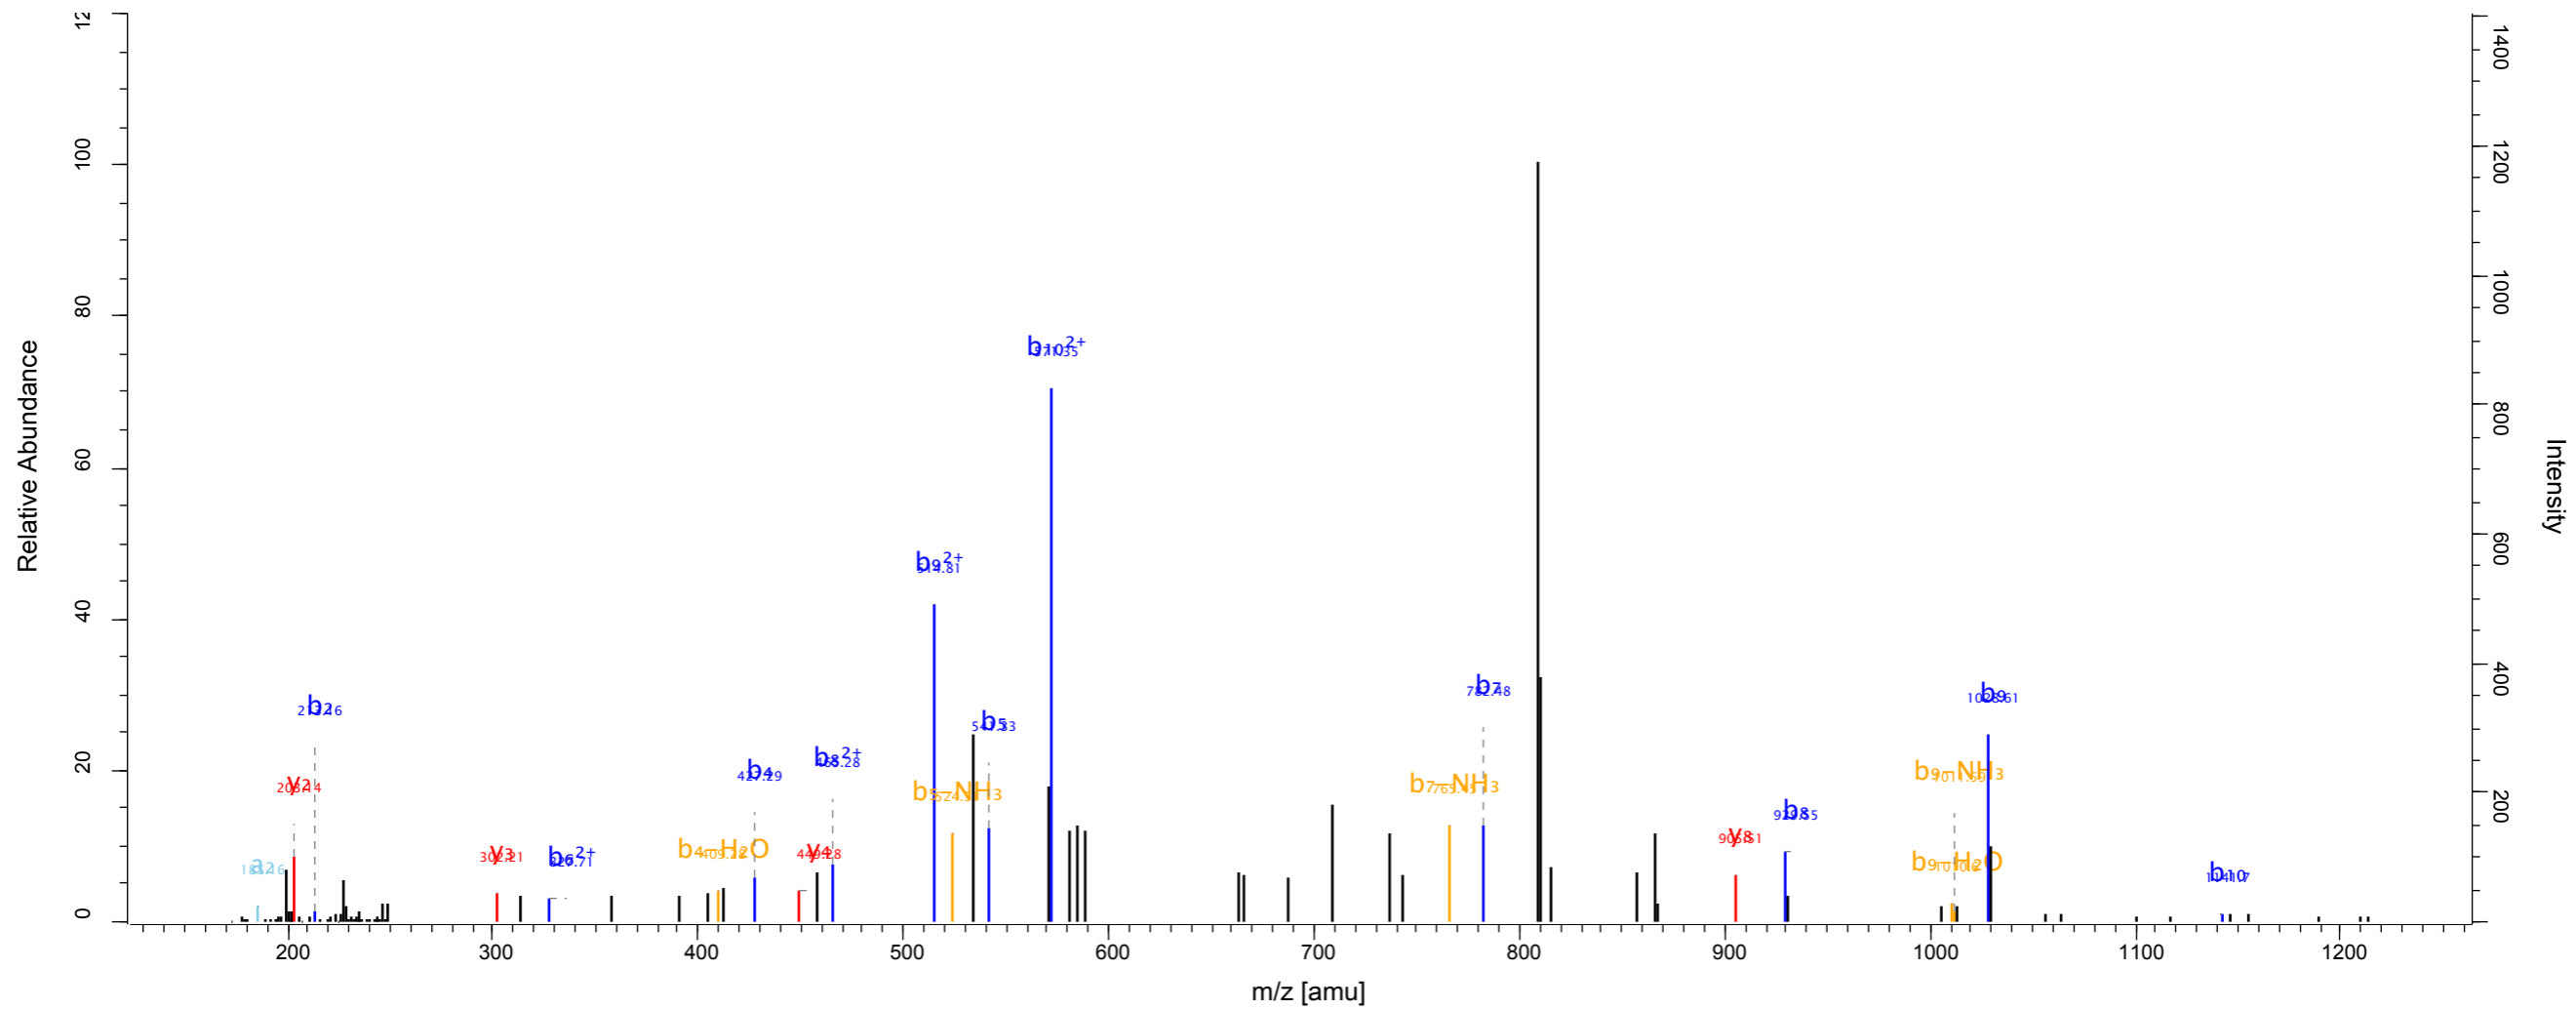

Scan number 7575 Raw file SKaraca\_LMB\_TCE\_Reverse\_241011\_12\_rep3  
 Method ITMS; CID Pepti... 122.1

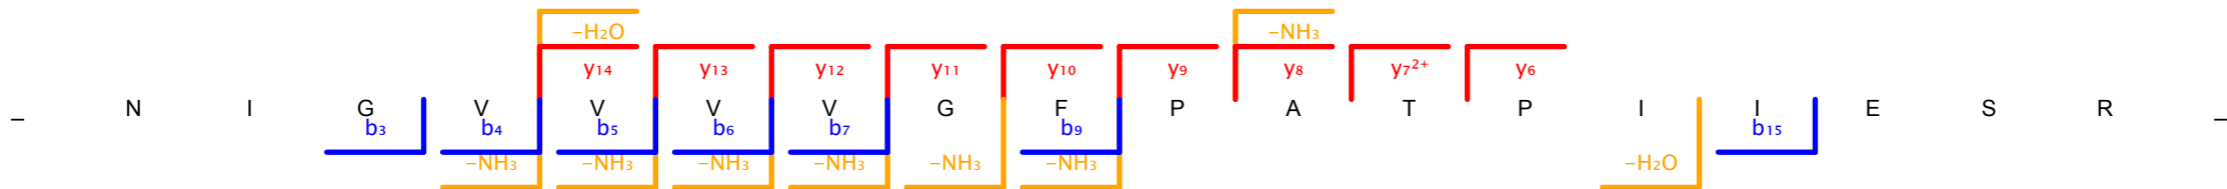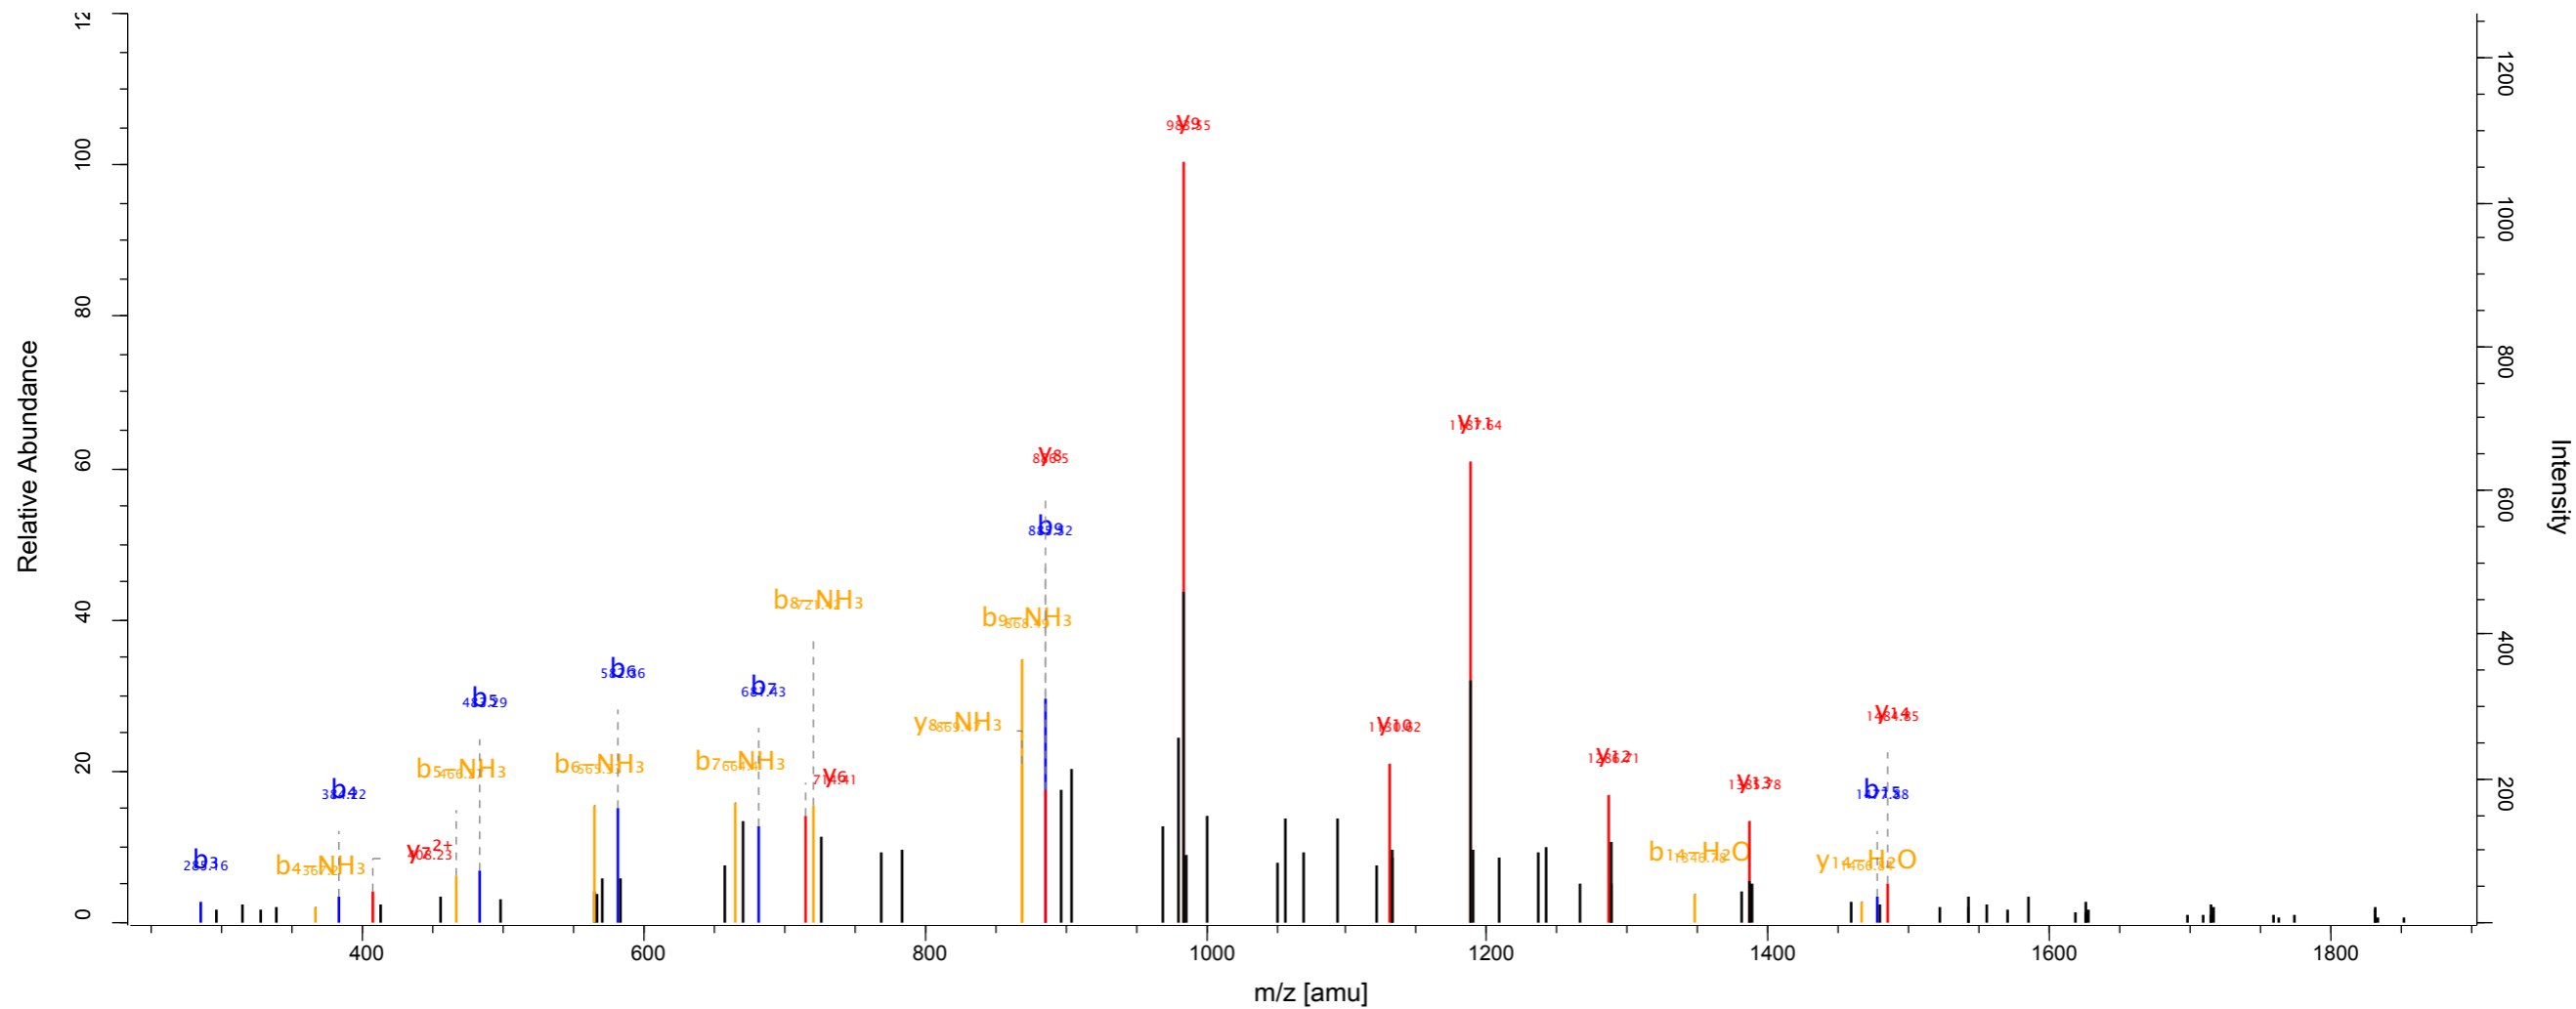

|             |           |          |                                        |
|-------------|-----------|----------|----------------------------------------|
| Scan number | 8011      | Raw file | SKaraca_LMB_TCE_Reverse_241011_12_rep3 |
| Method      | ITMS; CID | Pepti... | 160.48                                 |

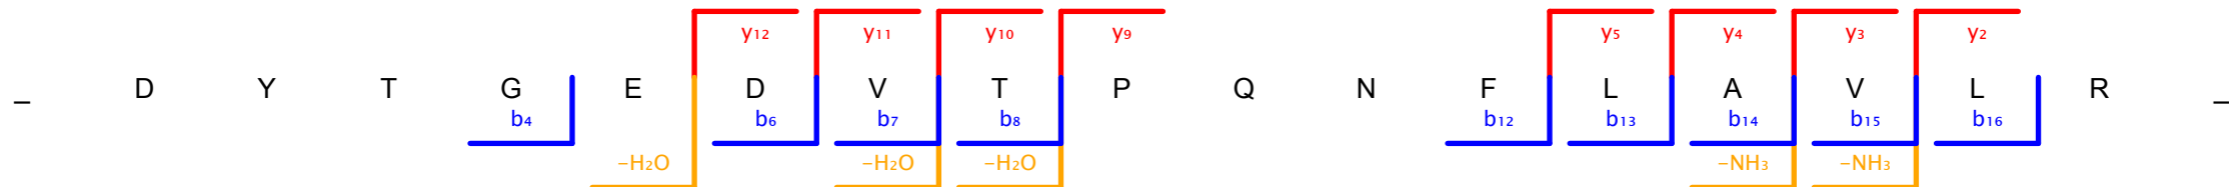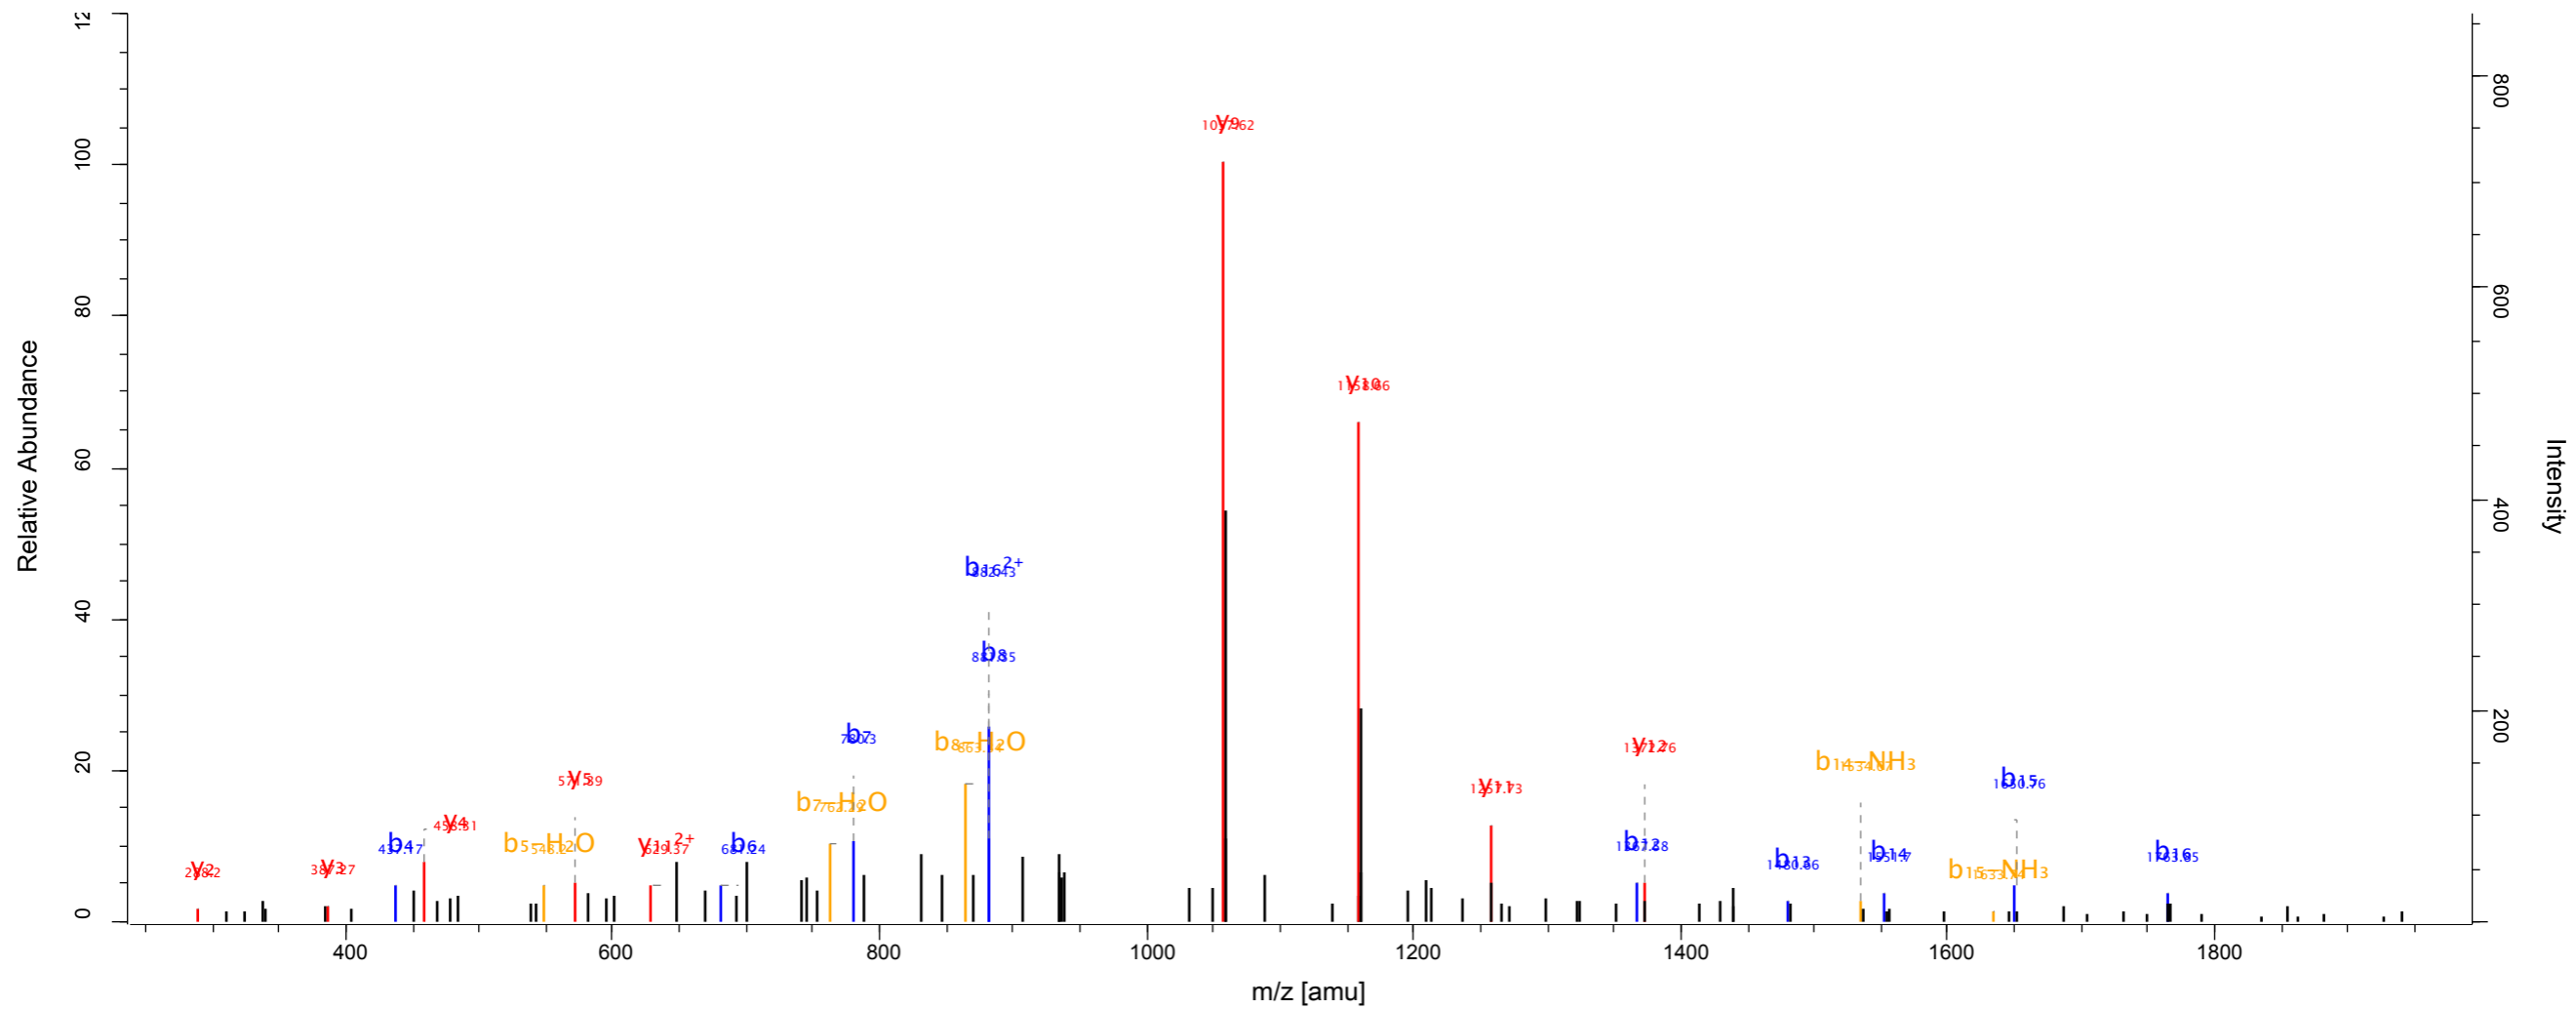

Scan number 8013 Raw file SKaraca\_LMB\_TCE\_Reverse\_241011\_13\_rep3  
 Method ITMS; CID Pepti... 113.69

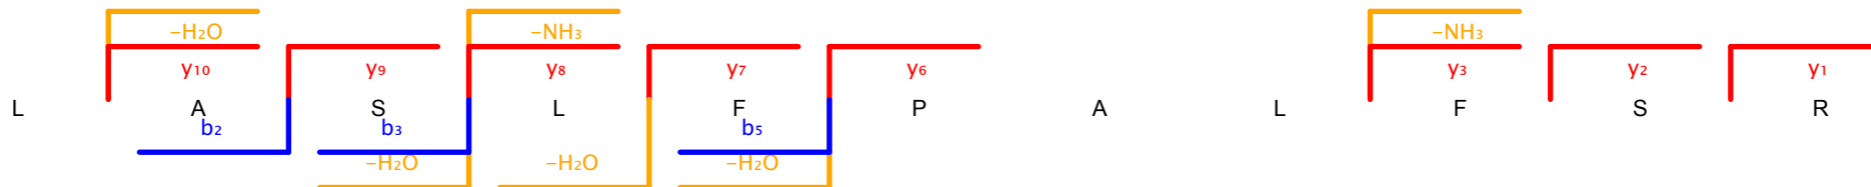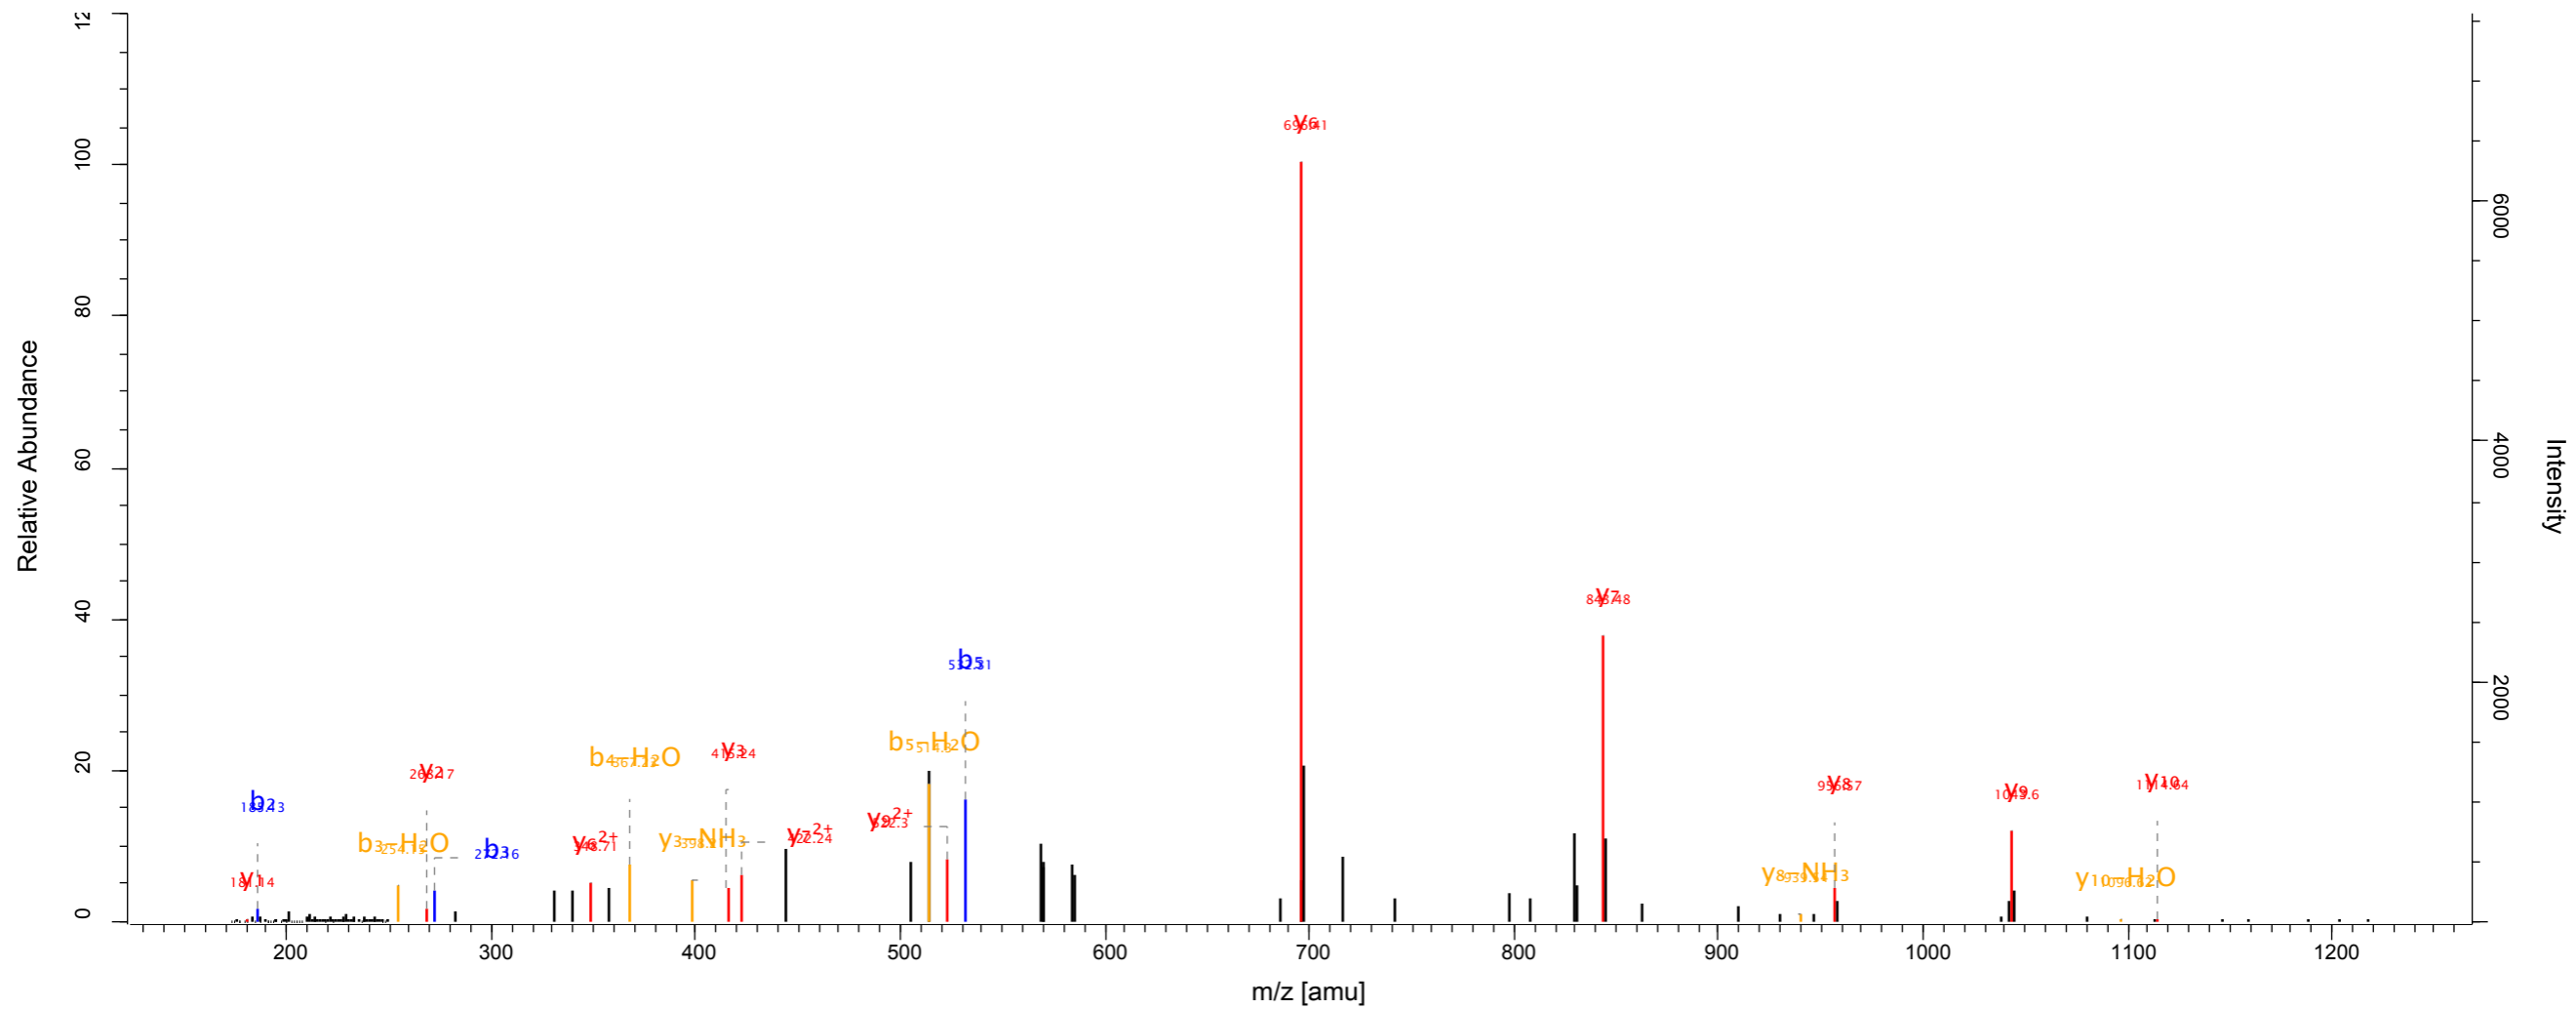

Scan number 8390 Raw file SKaraca\_LMB\_TCE\_Reverse\_241011\_14\_rep1  
 Method ITMS; CID Pepti... 228.38

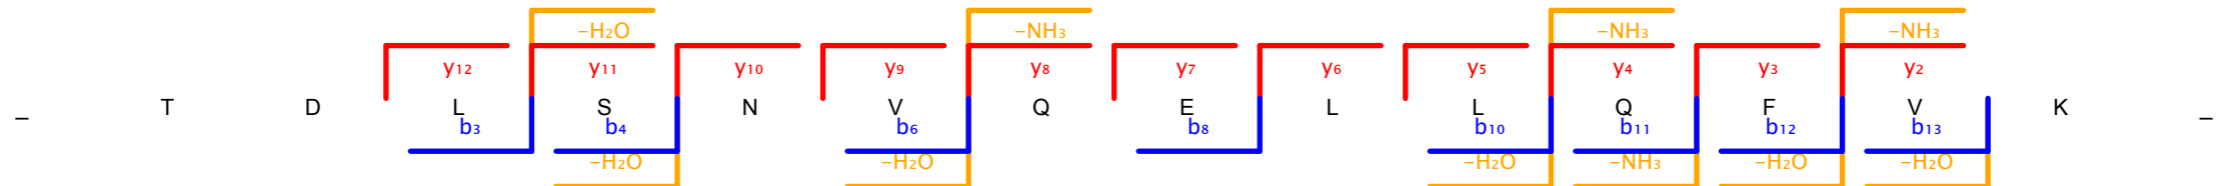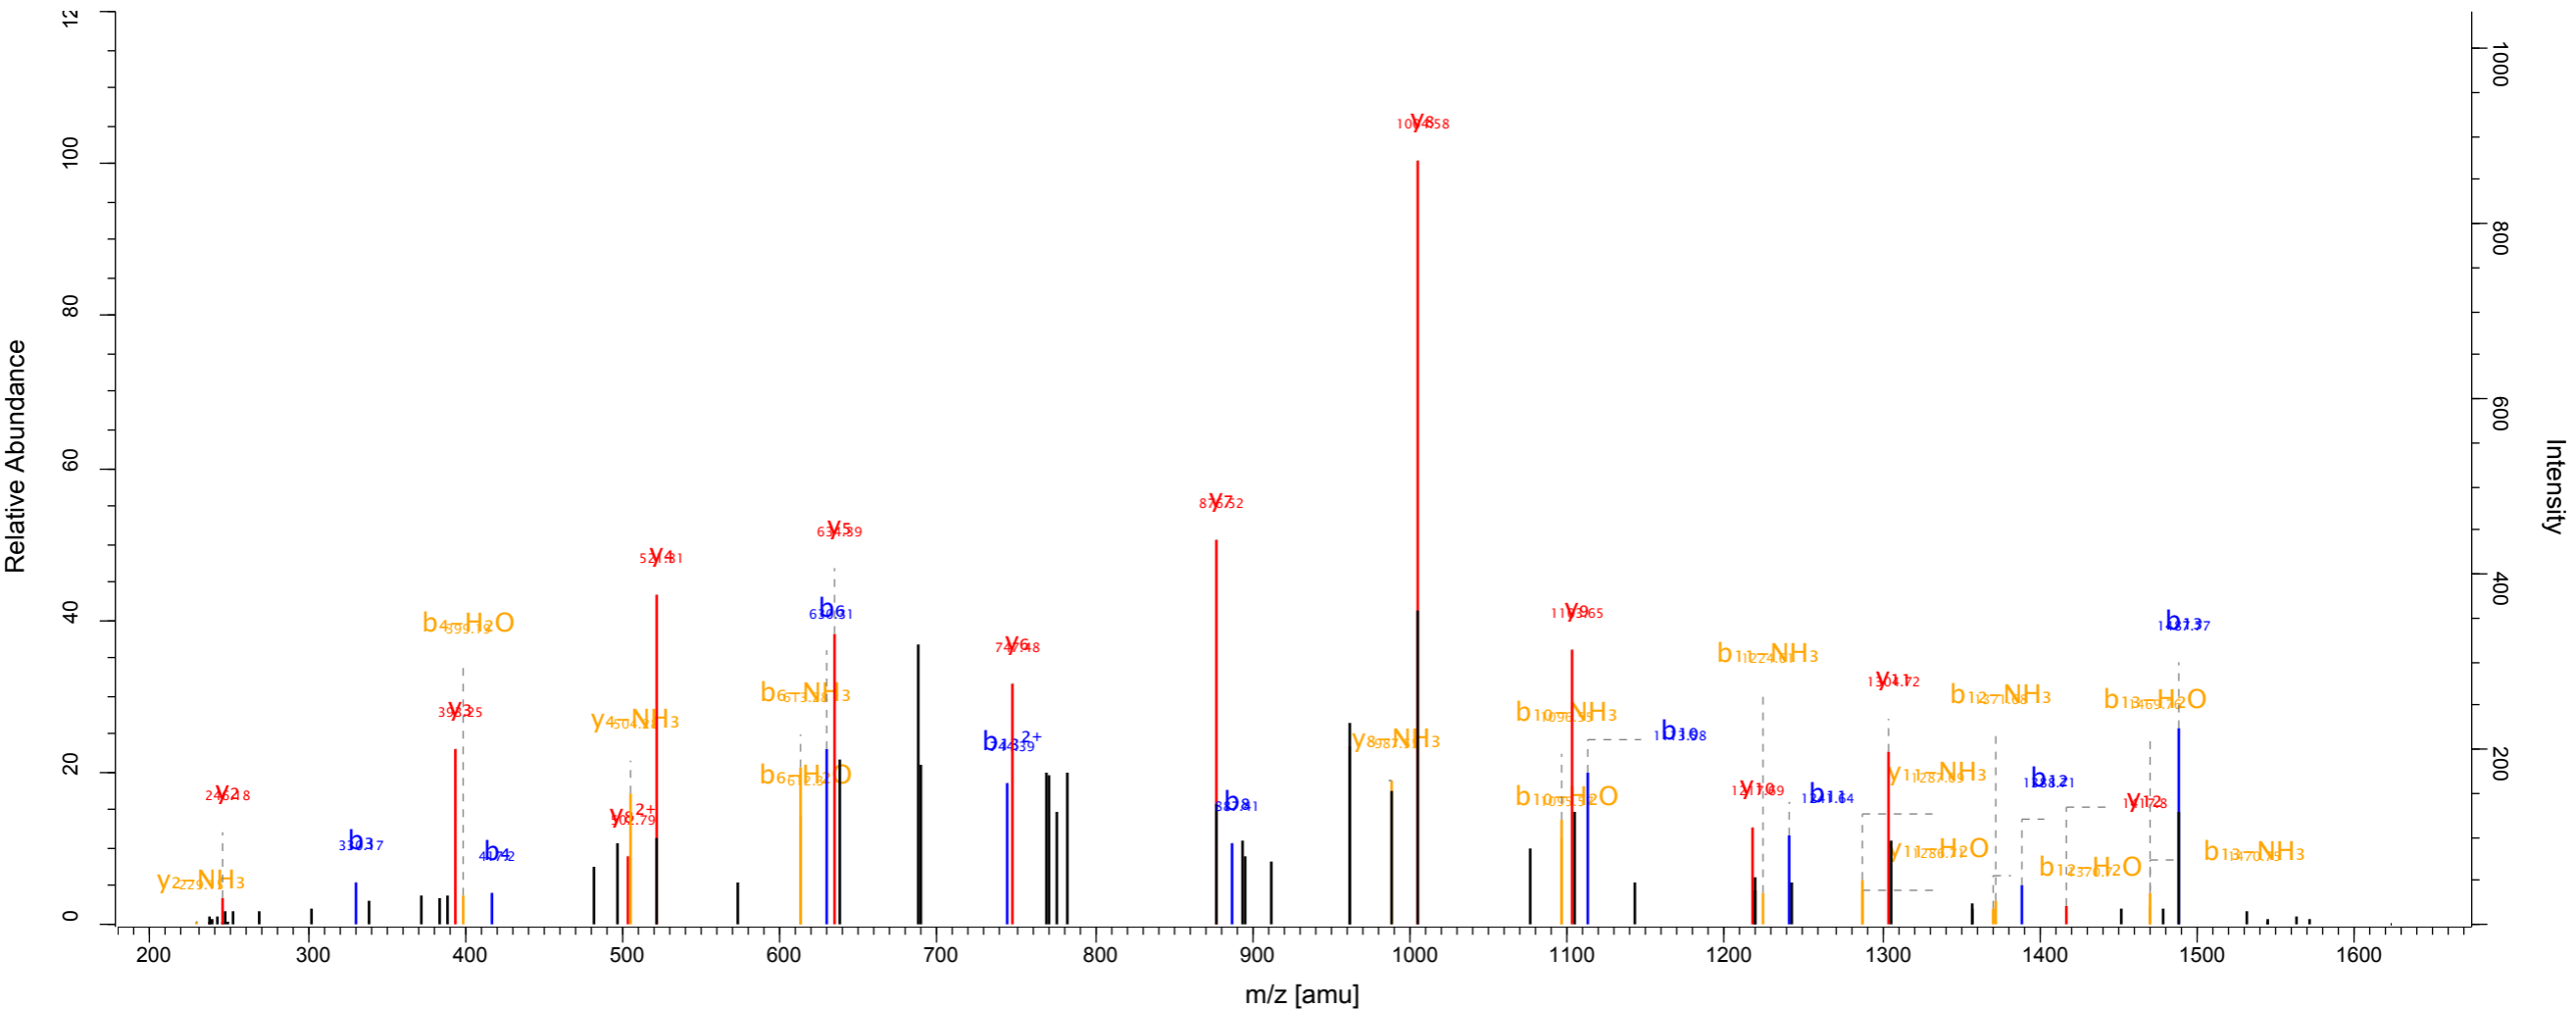

Scan number 5419 Raw file SKaraca\_LMB\_TCE\_Reverse\_241011\_14\_rep3  
 Method ITMS; CID Pepti... 135.02

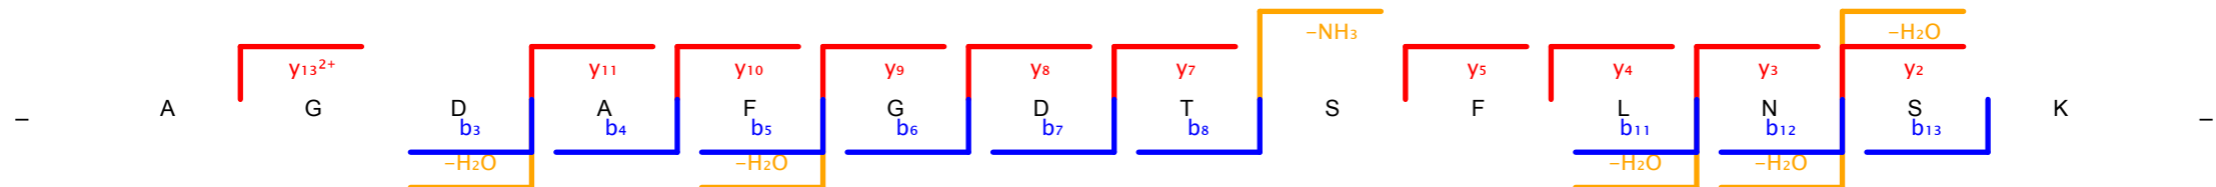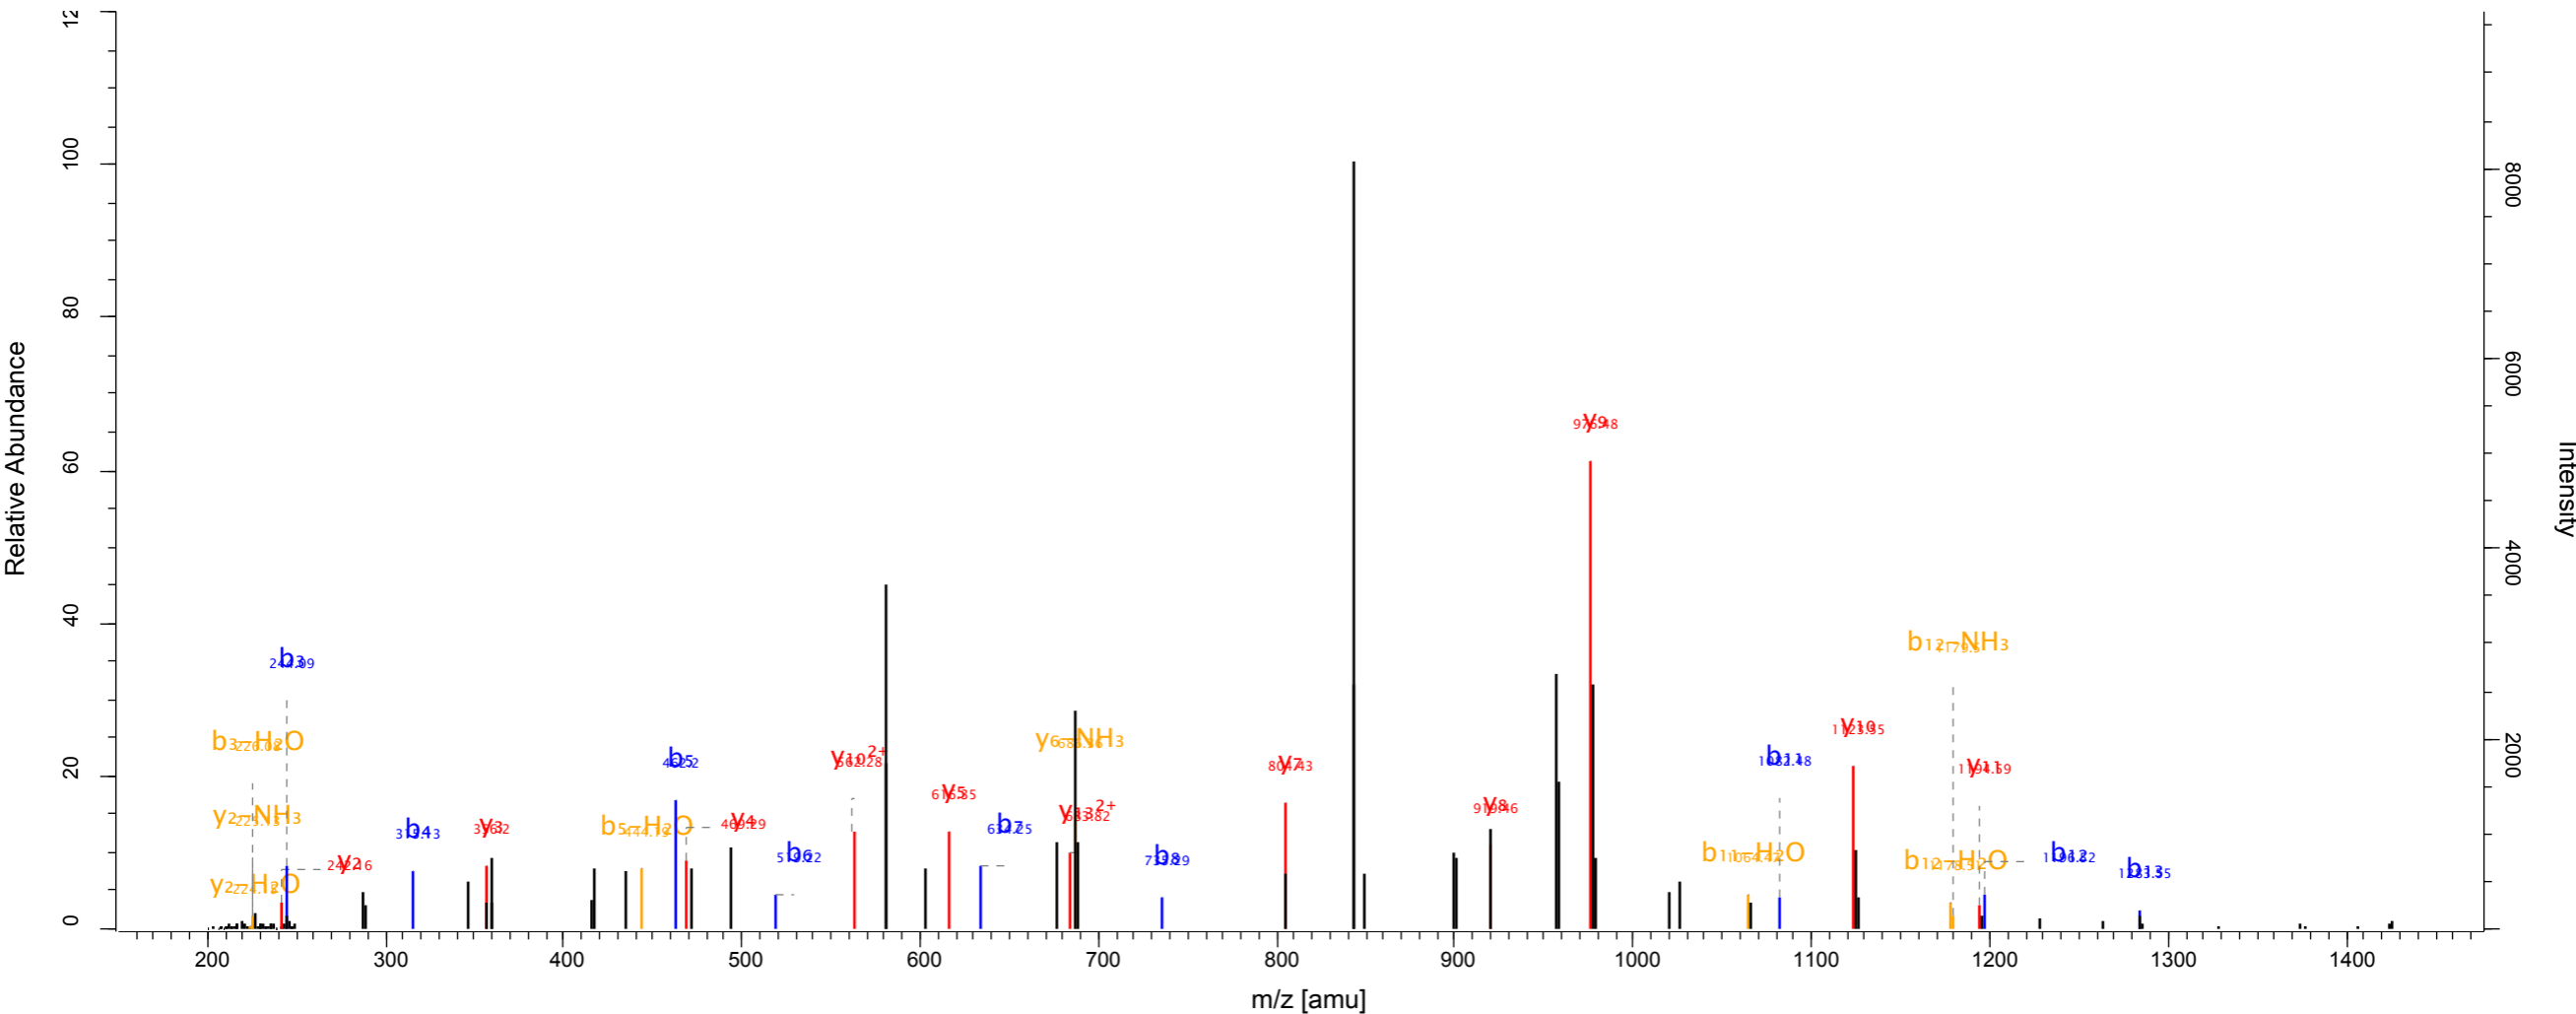

Scan number 8308 Raw file SKaraca\_LMB\_TCE\_Reverse\_241011\_15\_rep1  
 Method ITMS; CID Pepti... 114.72

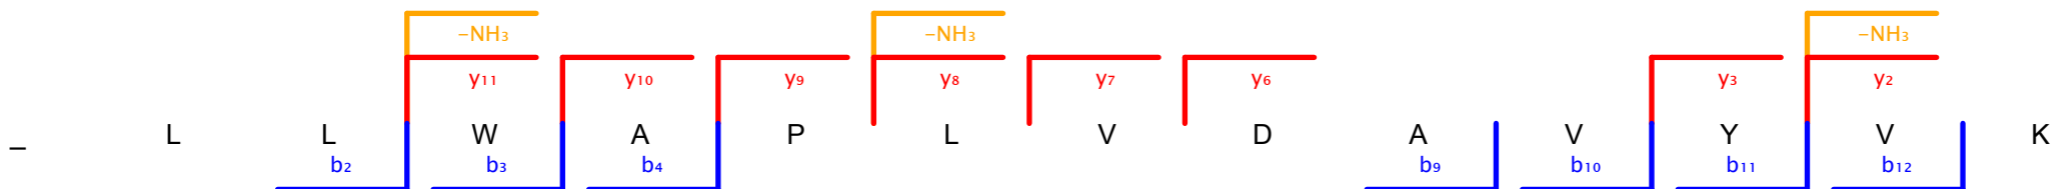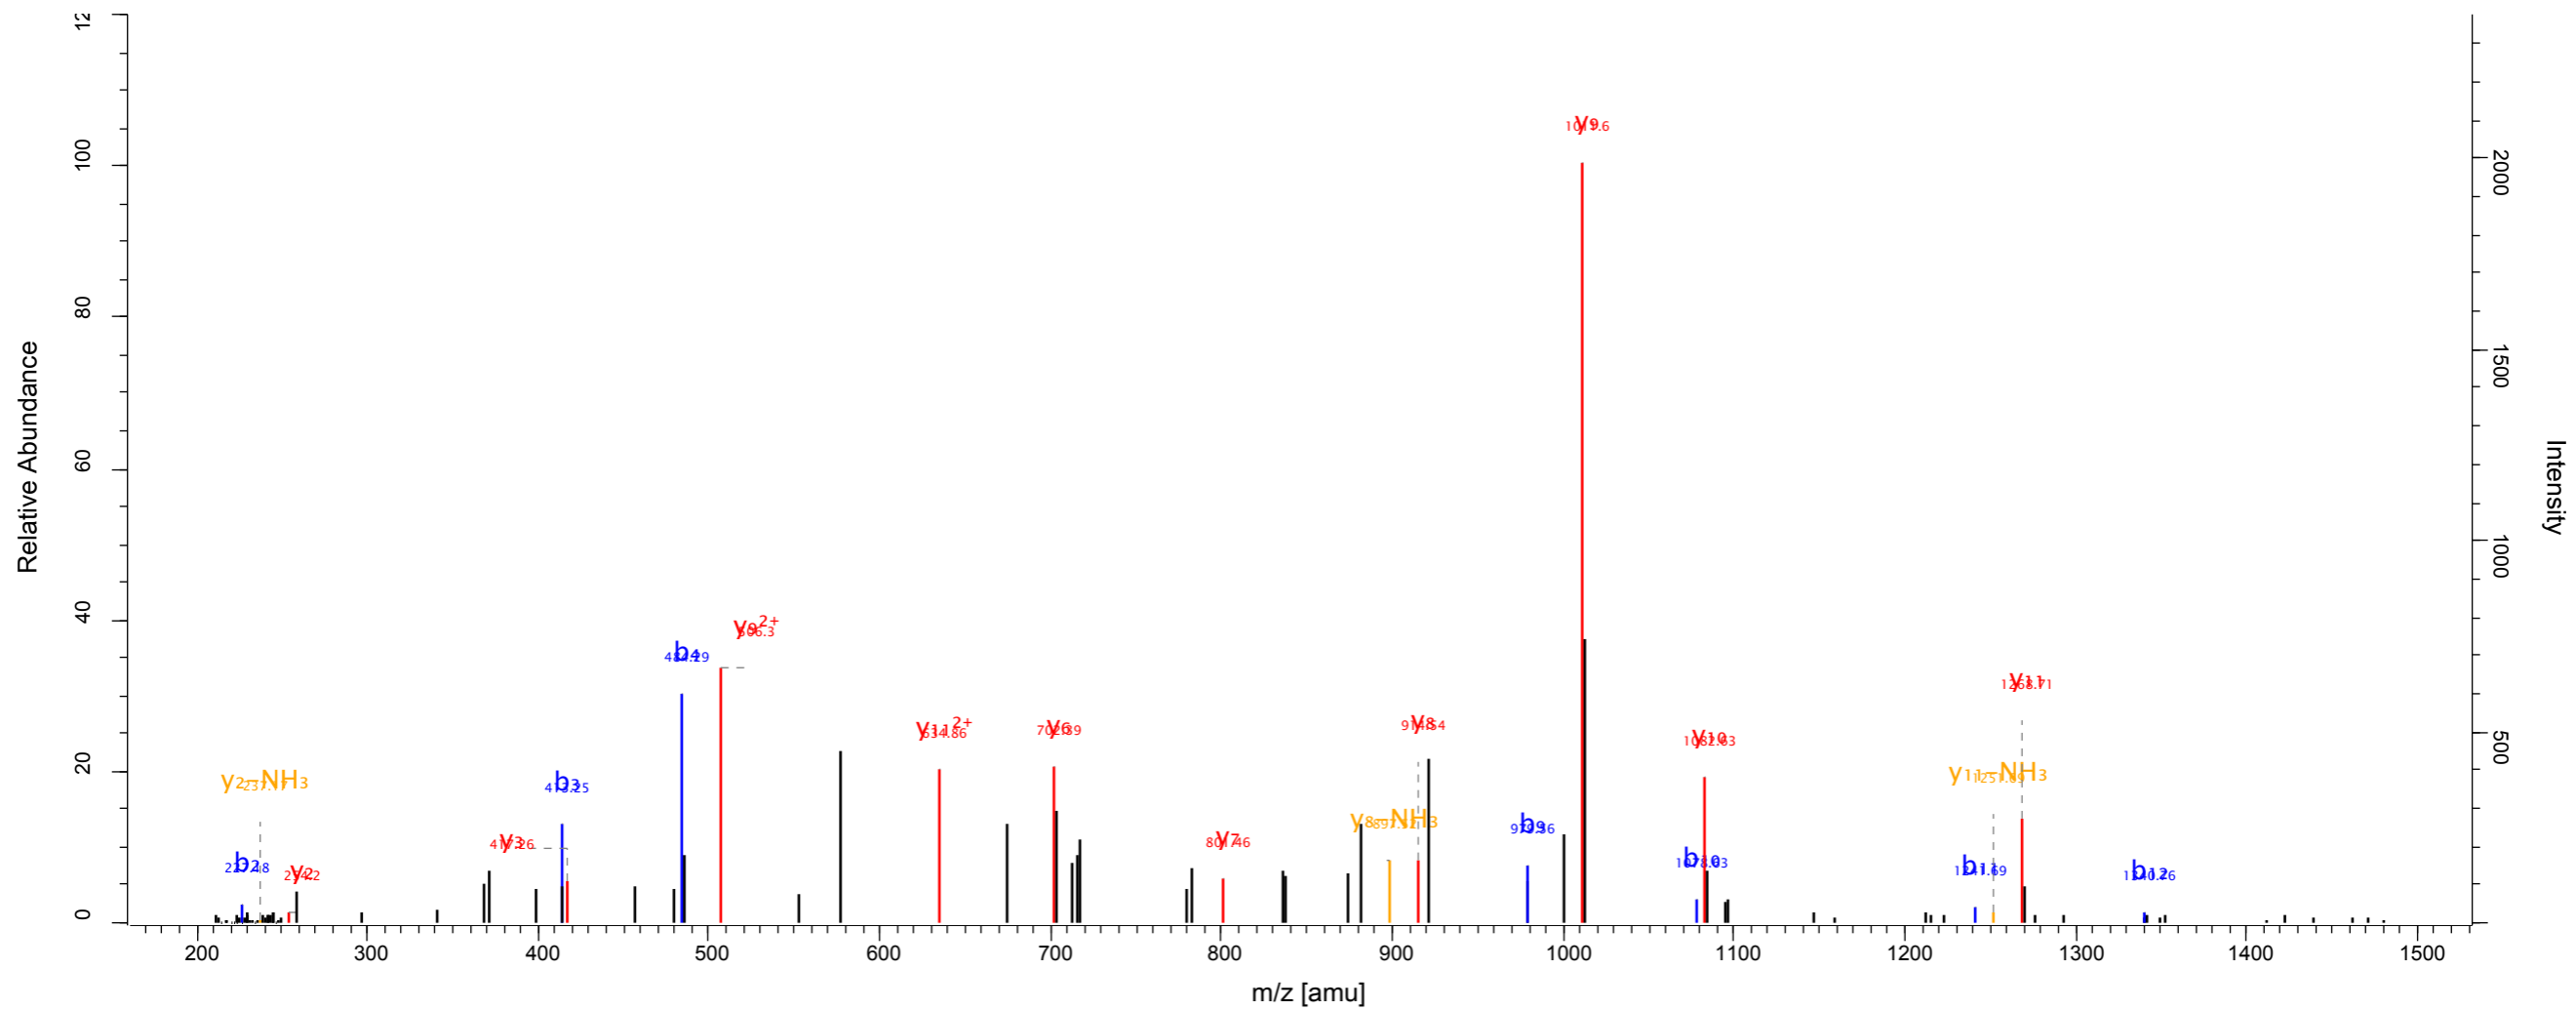

Scan number 8751 Raw file SKaraca\_LMB\_TCE\_Reverse\_241011\_15\_rep1  
 Method ITMS; CID Pepti... 136.44

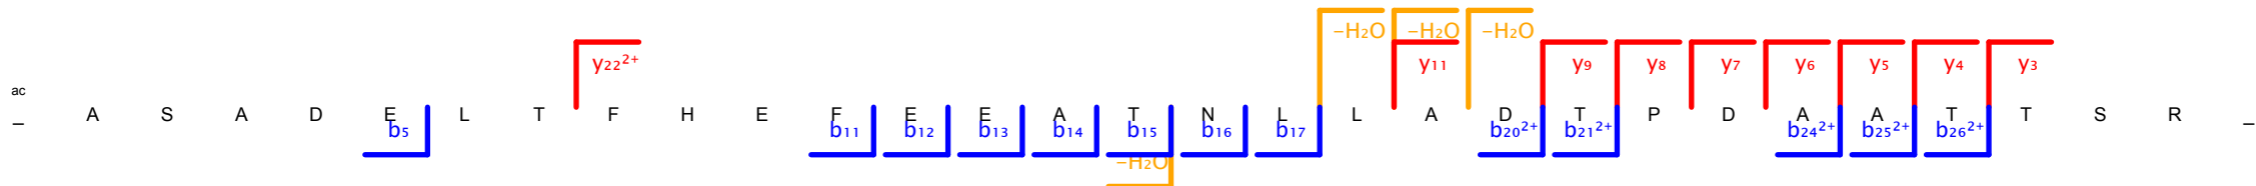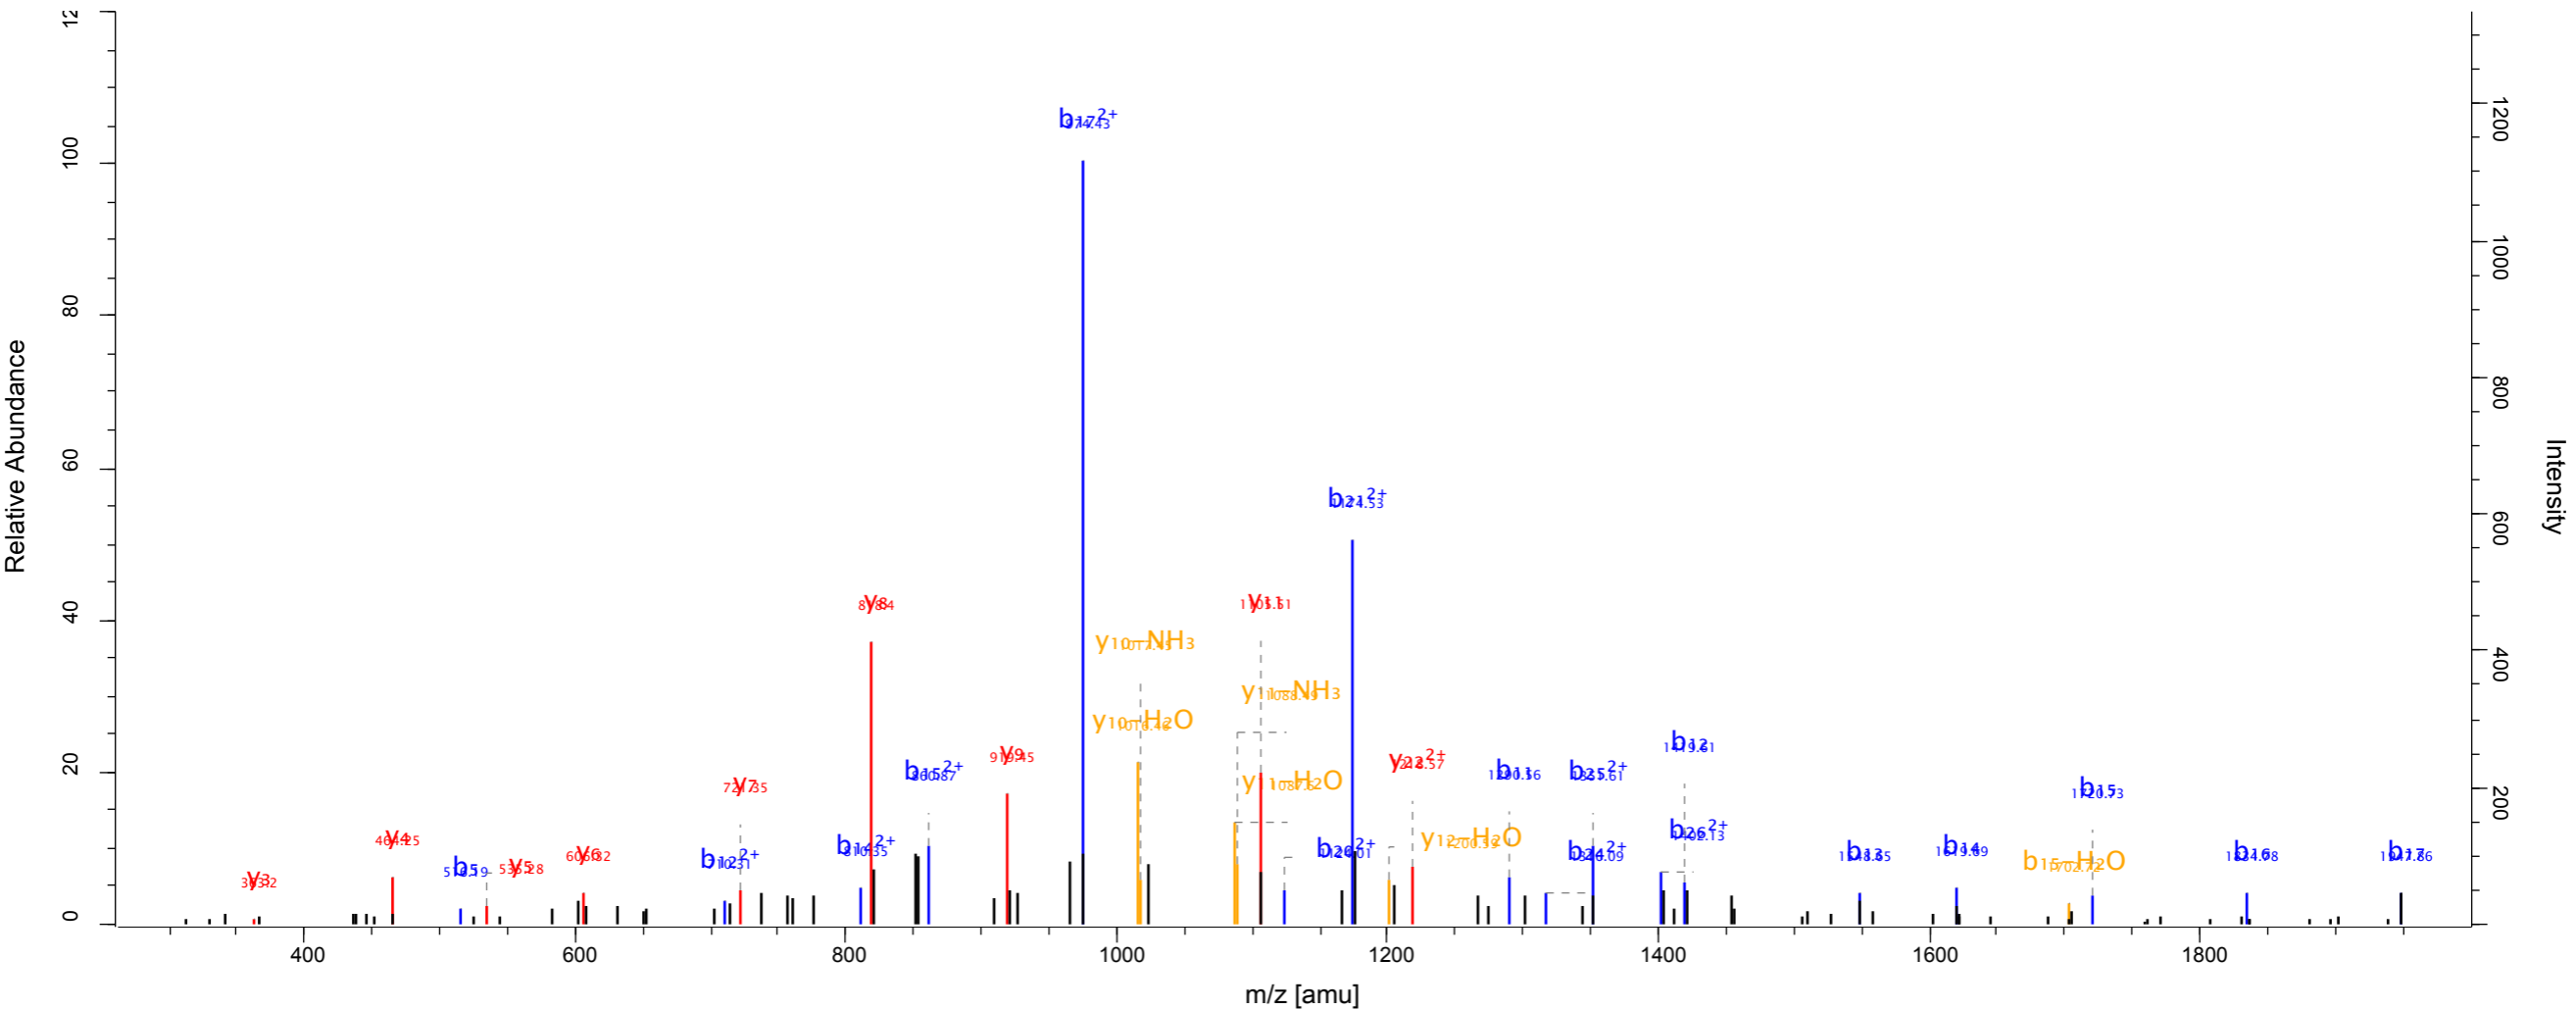



|             |           |          |                                        |
|-------------|-----------|----------|----------------------------------------|
| Scan number | 1945      | Raw file | SKaraca_LMB_TCE_Reverse_241011_15_rep2 |
| Method      | ITMS; CID | Pepti... | 151.44                                 |

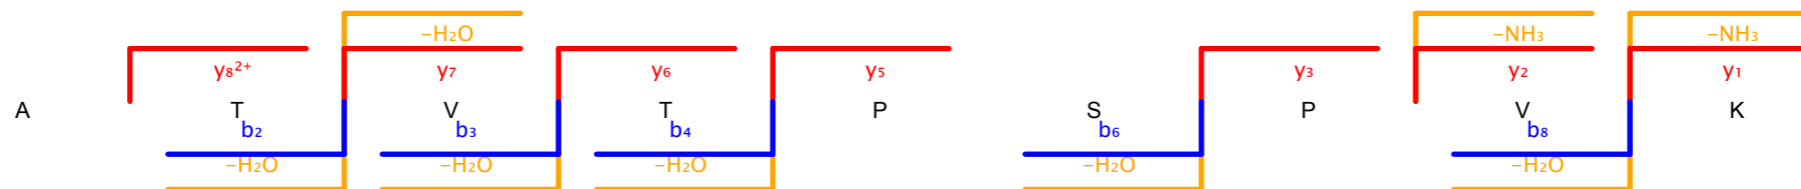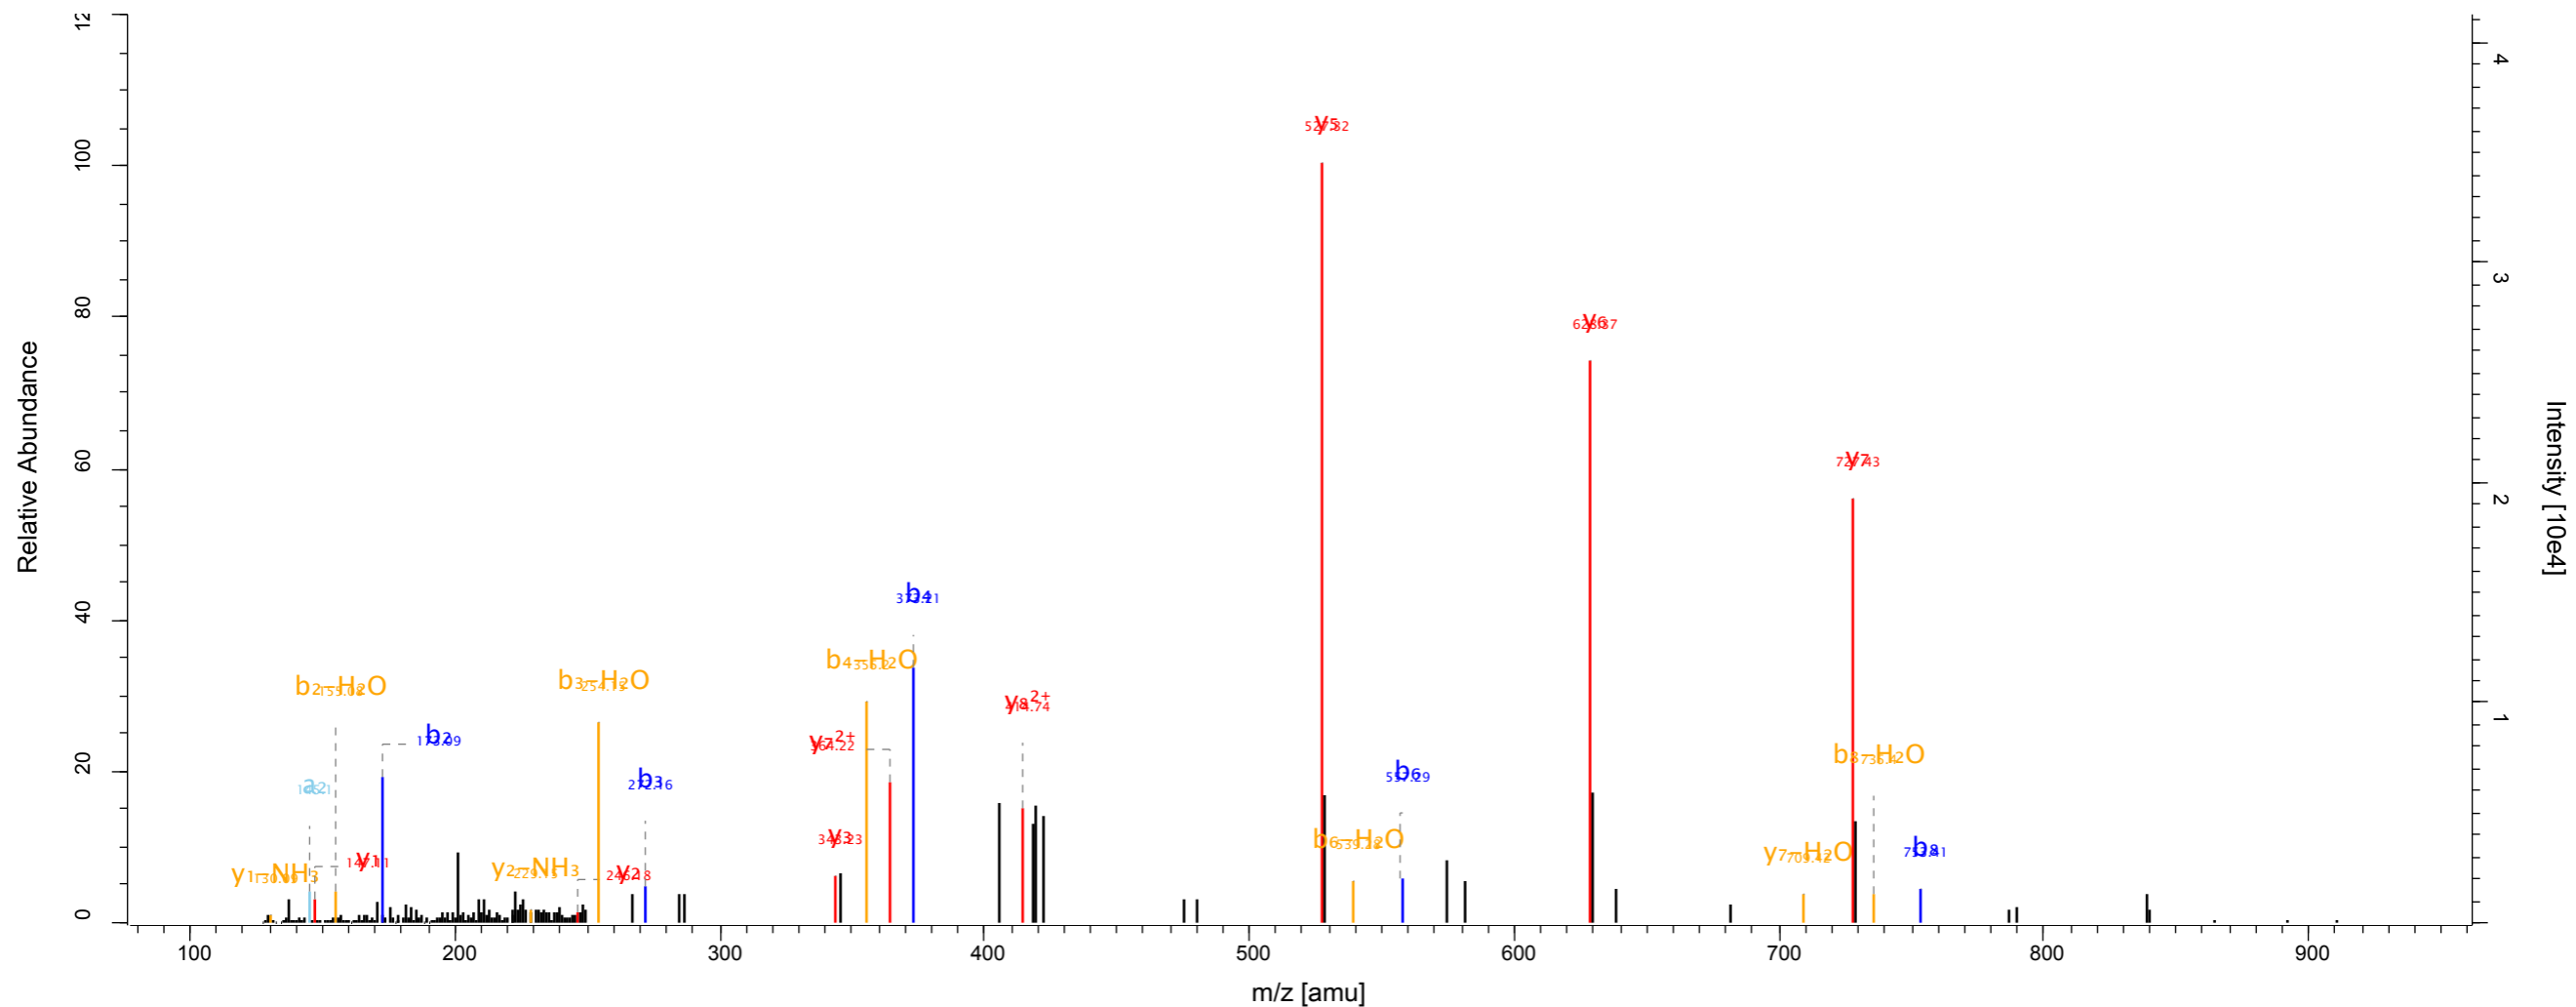

Scan number 3415 Raw file SKaraca\_LMB\_TCE\_Reverse\_241011\_6\_rep2  
 Method ITMS; CID Pepti... 107.35

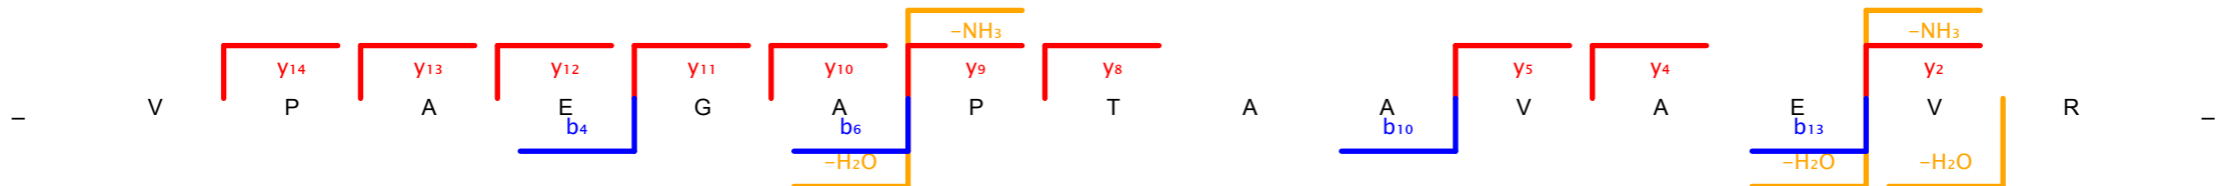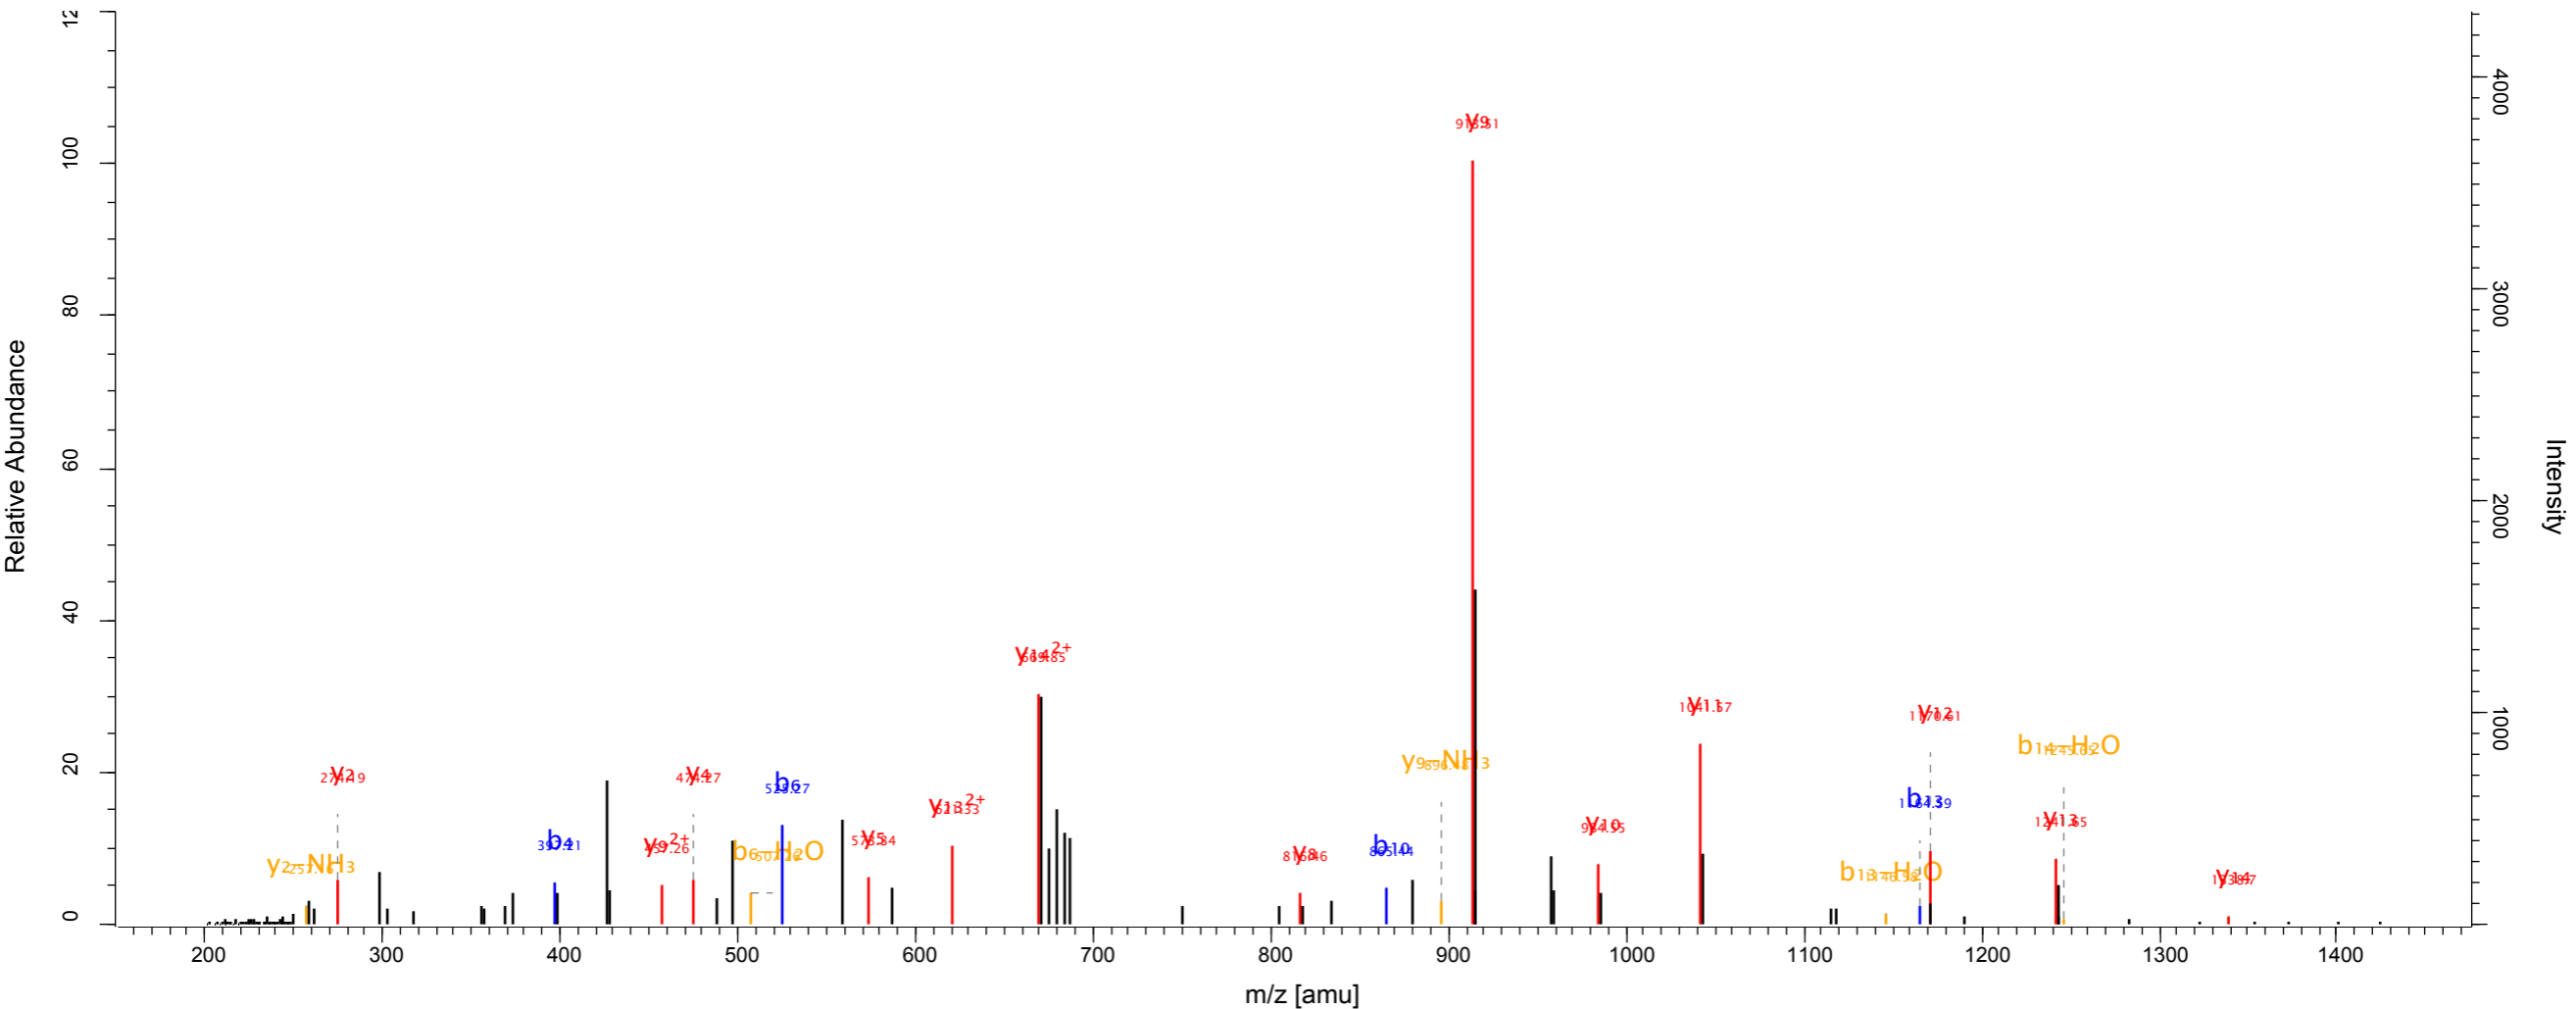

Scan number 7446 Raw file SKaraca\_LMB\_TCE\_Reverse\_241011\_8\_rep2  
 Method ITMS; CID Pepti... 106.93

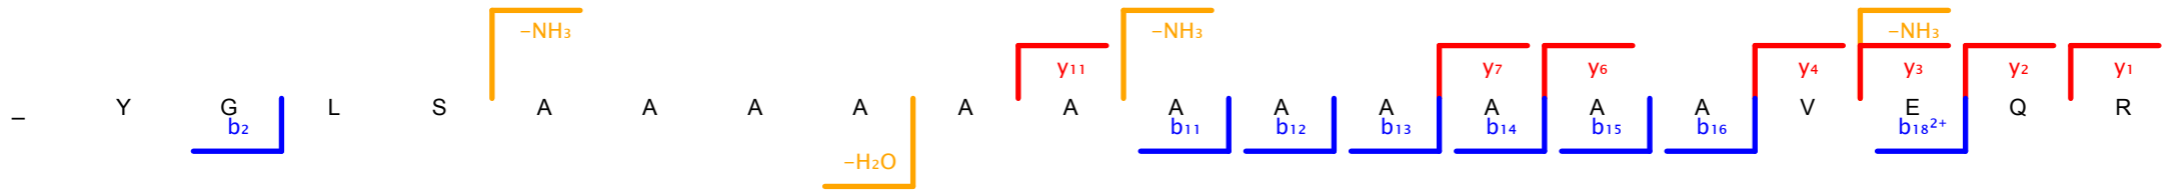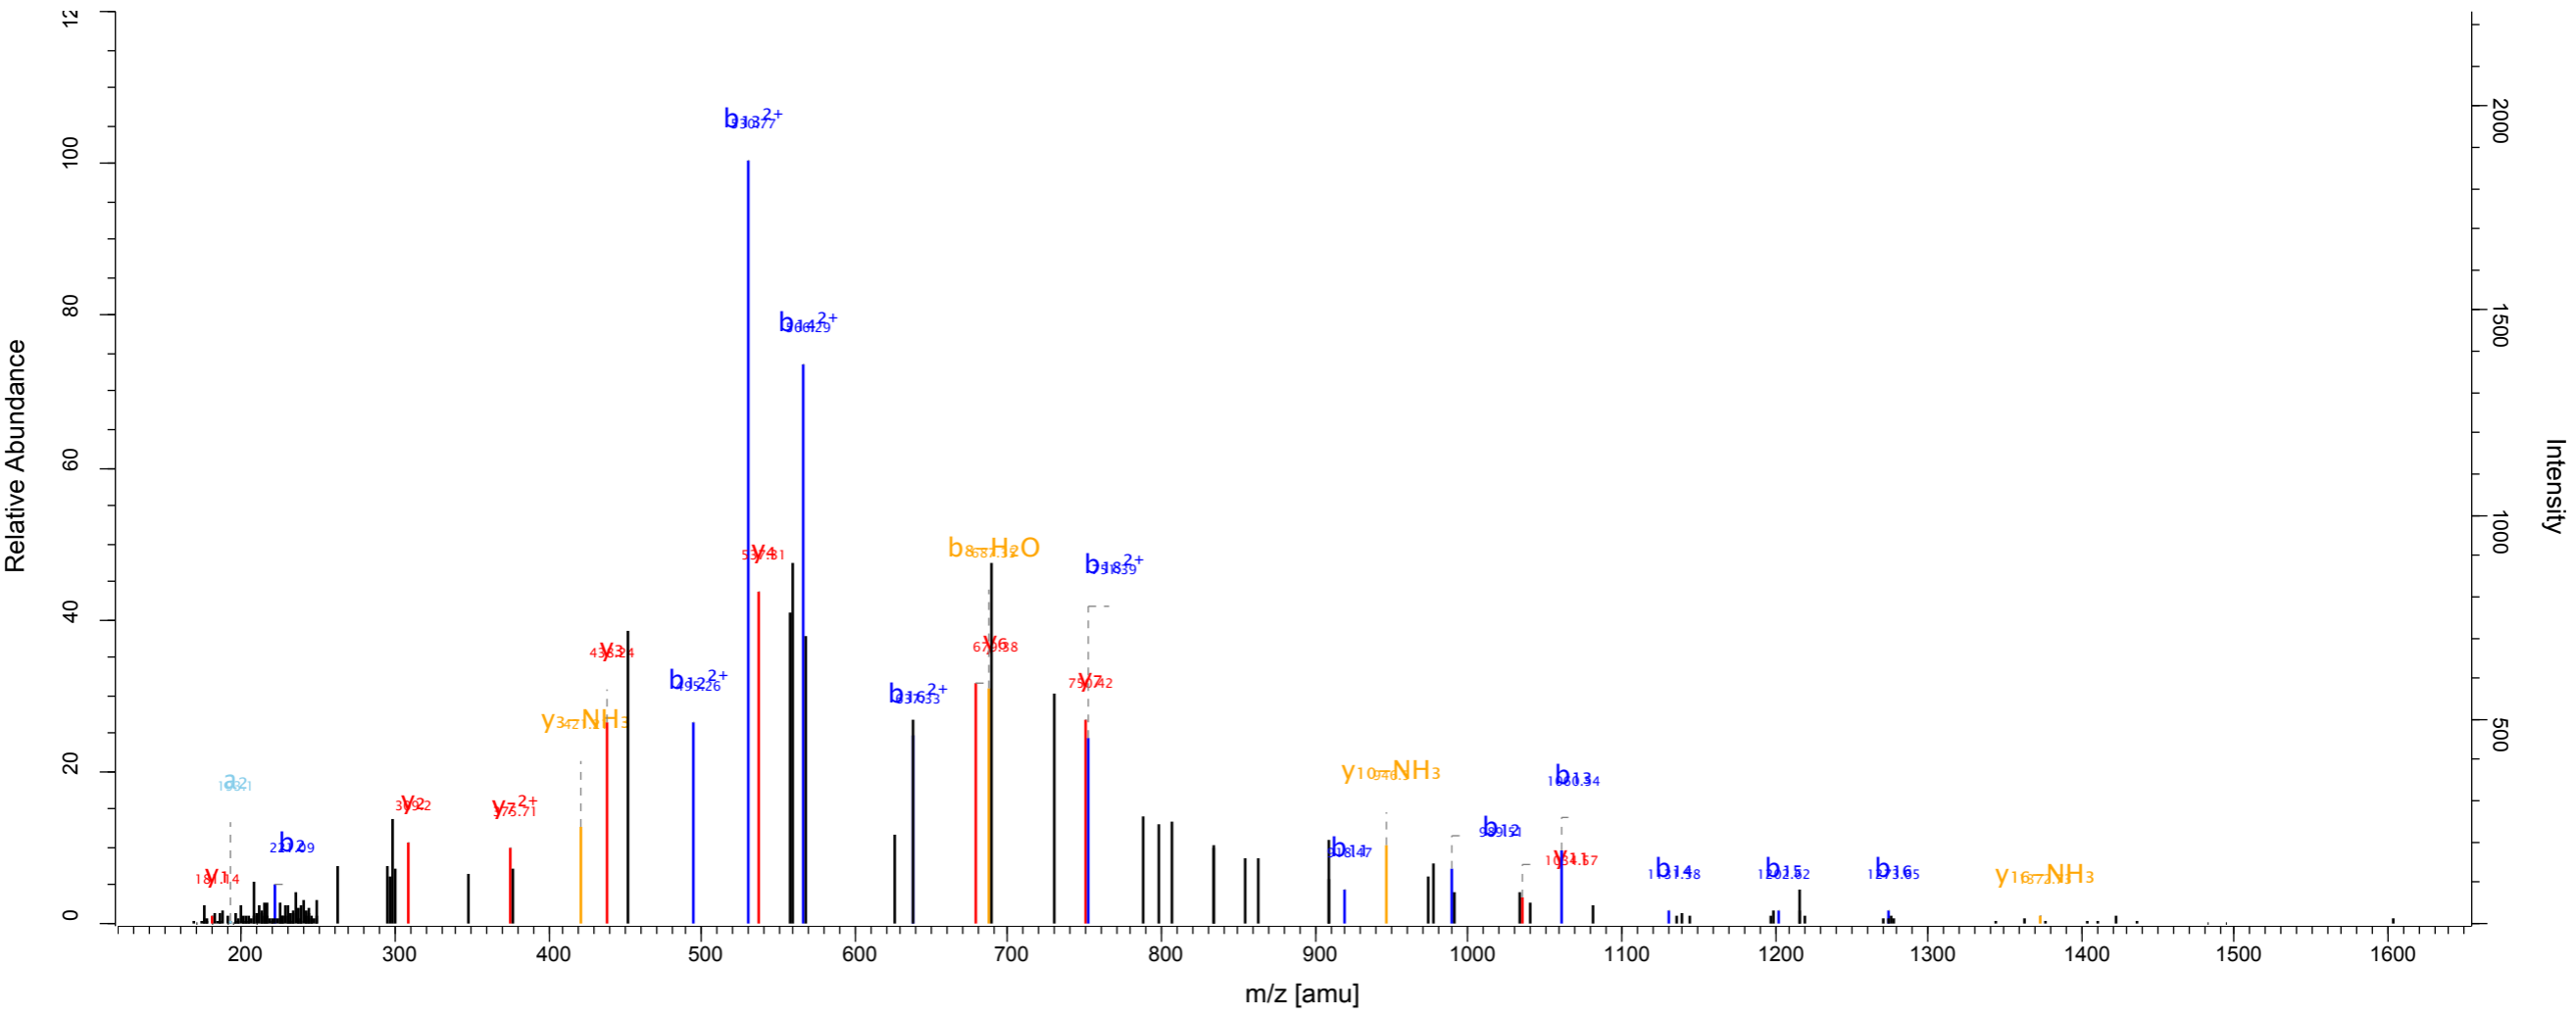

Scan number 8029 Raw file SKaraca\_LMB\_TCE\_Reverse\_241011\_9\_rep1  
 Method ITMS; CID Pepti... 74.51

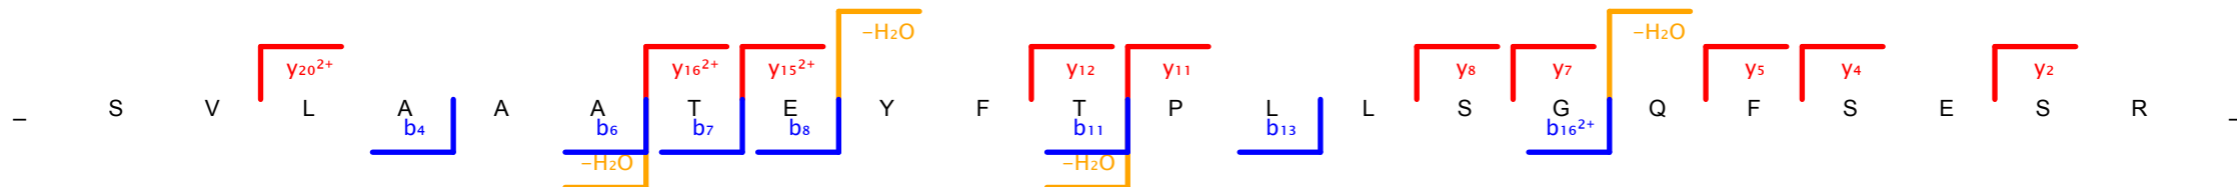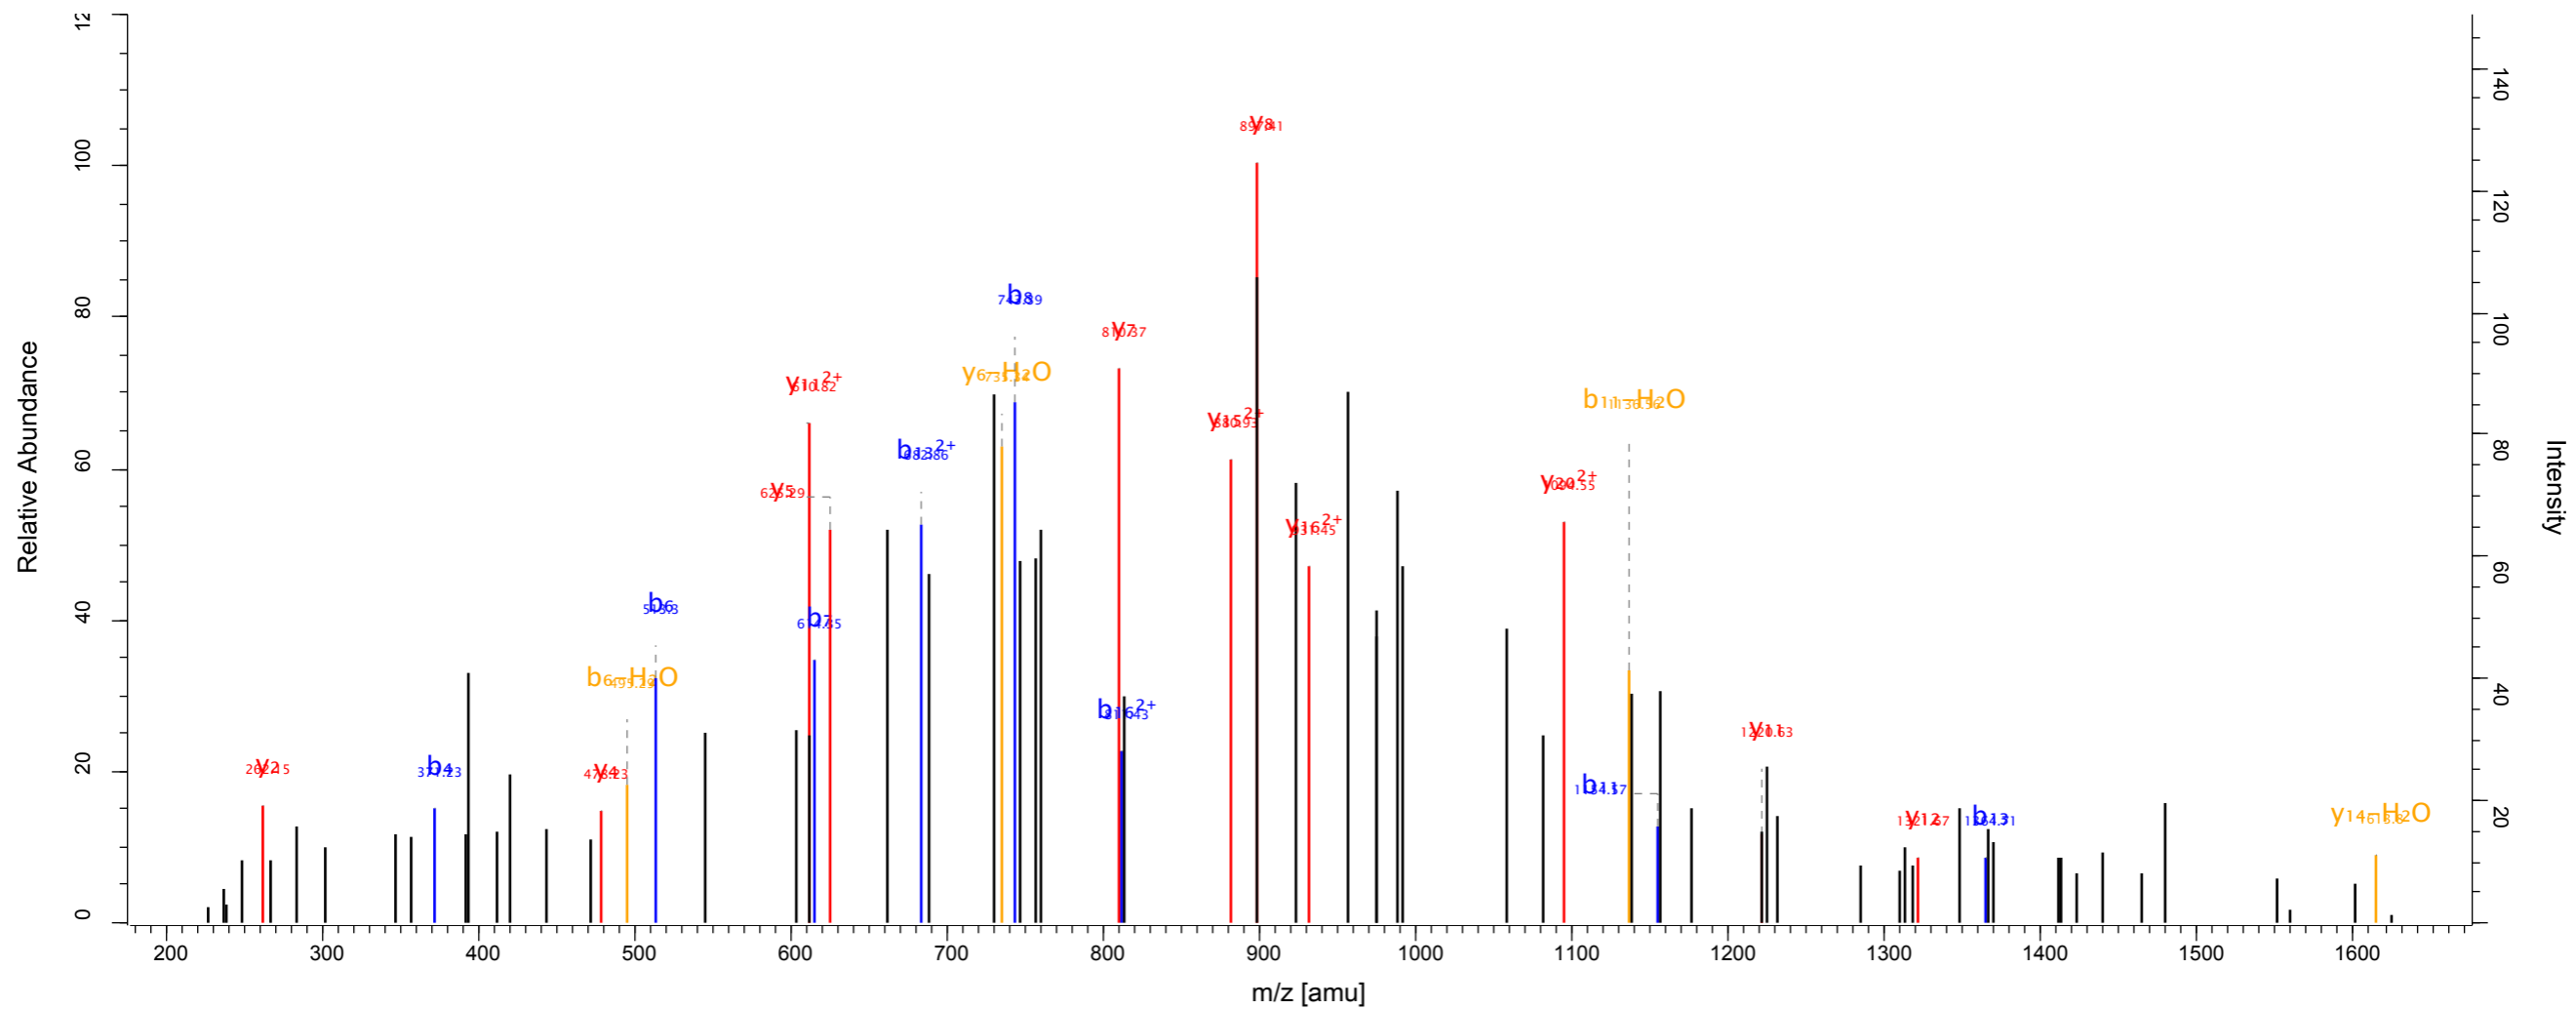

Scan number 4882 Raw file SKaraca\_LMB\_TCE\_Reverse\_281011\_17\_rep1  
Method ITMS; CID Pepti... 141.32

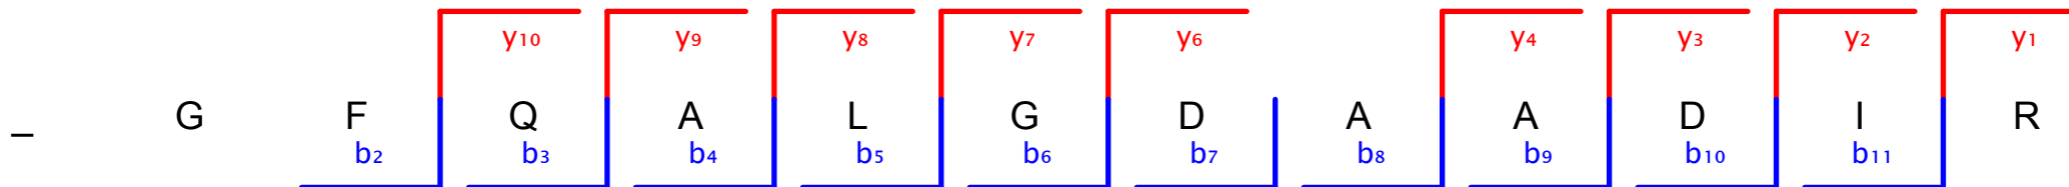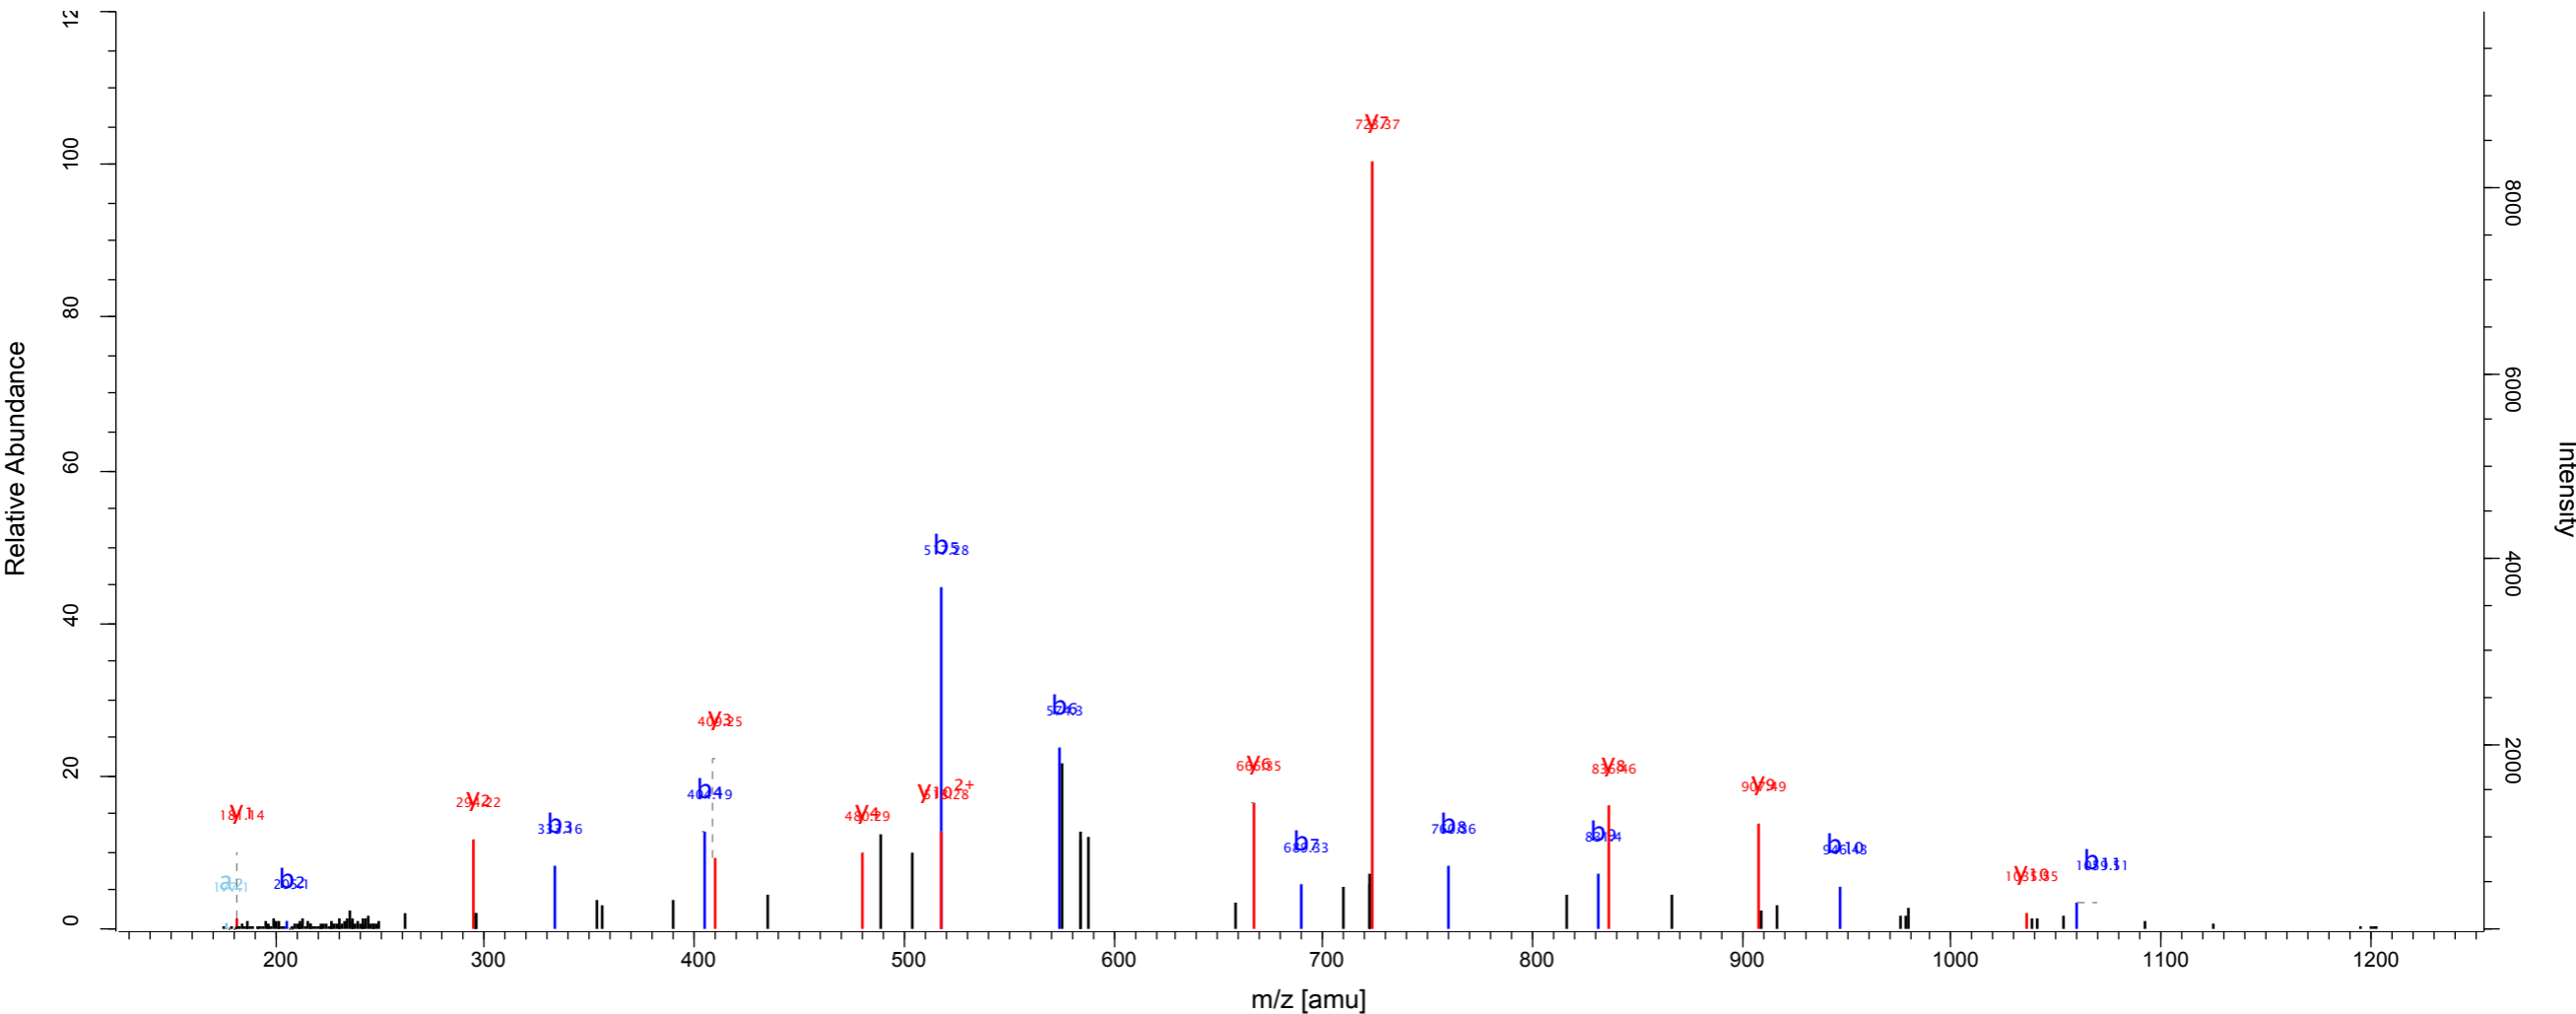

Scan number 6963 Raw file SKaraca\_LMB\_TCE\_Reverse\_281011\_17\_rep1  
 Method ITMS; CID Pepti... 193.77

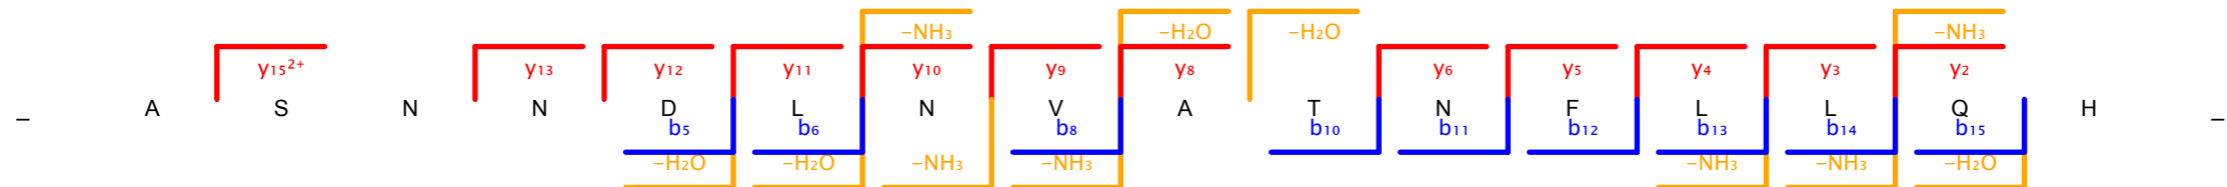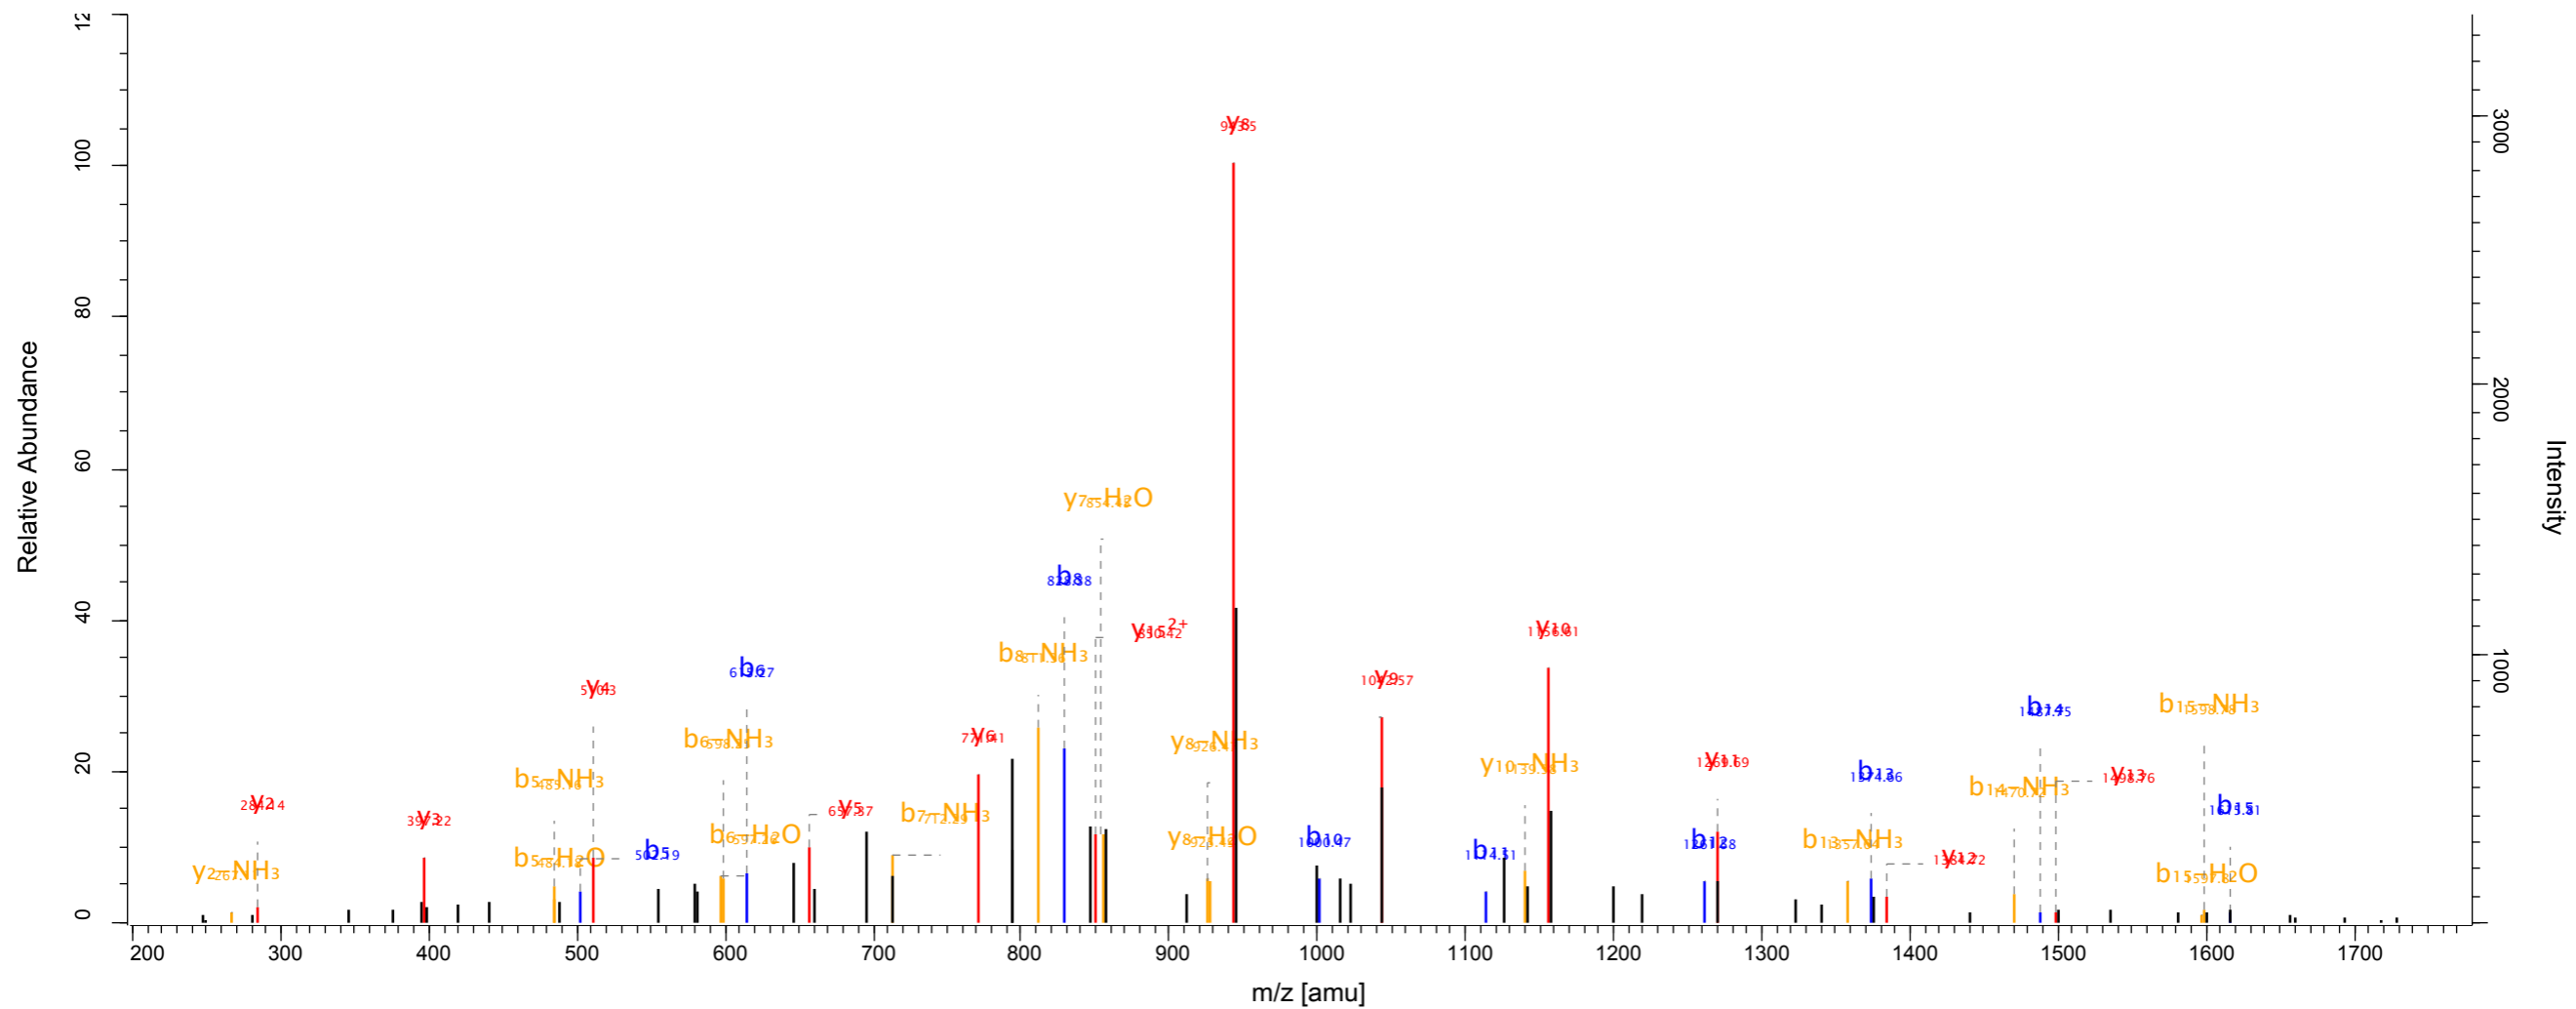

Scan number 8036 Raw file SKaraca\_LMB\_TCE\_Reverse\_281011\_17\_rep1  
 Method ITMS; CID Pepti... 183.89

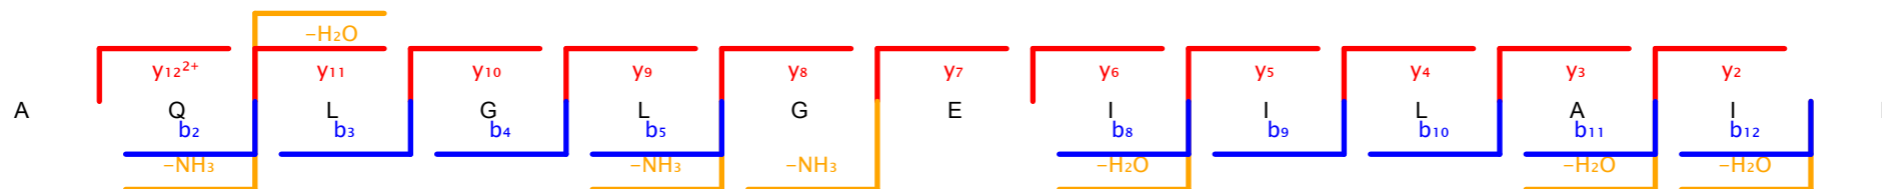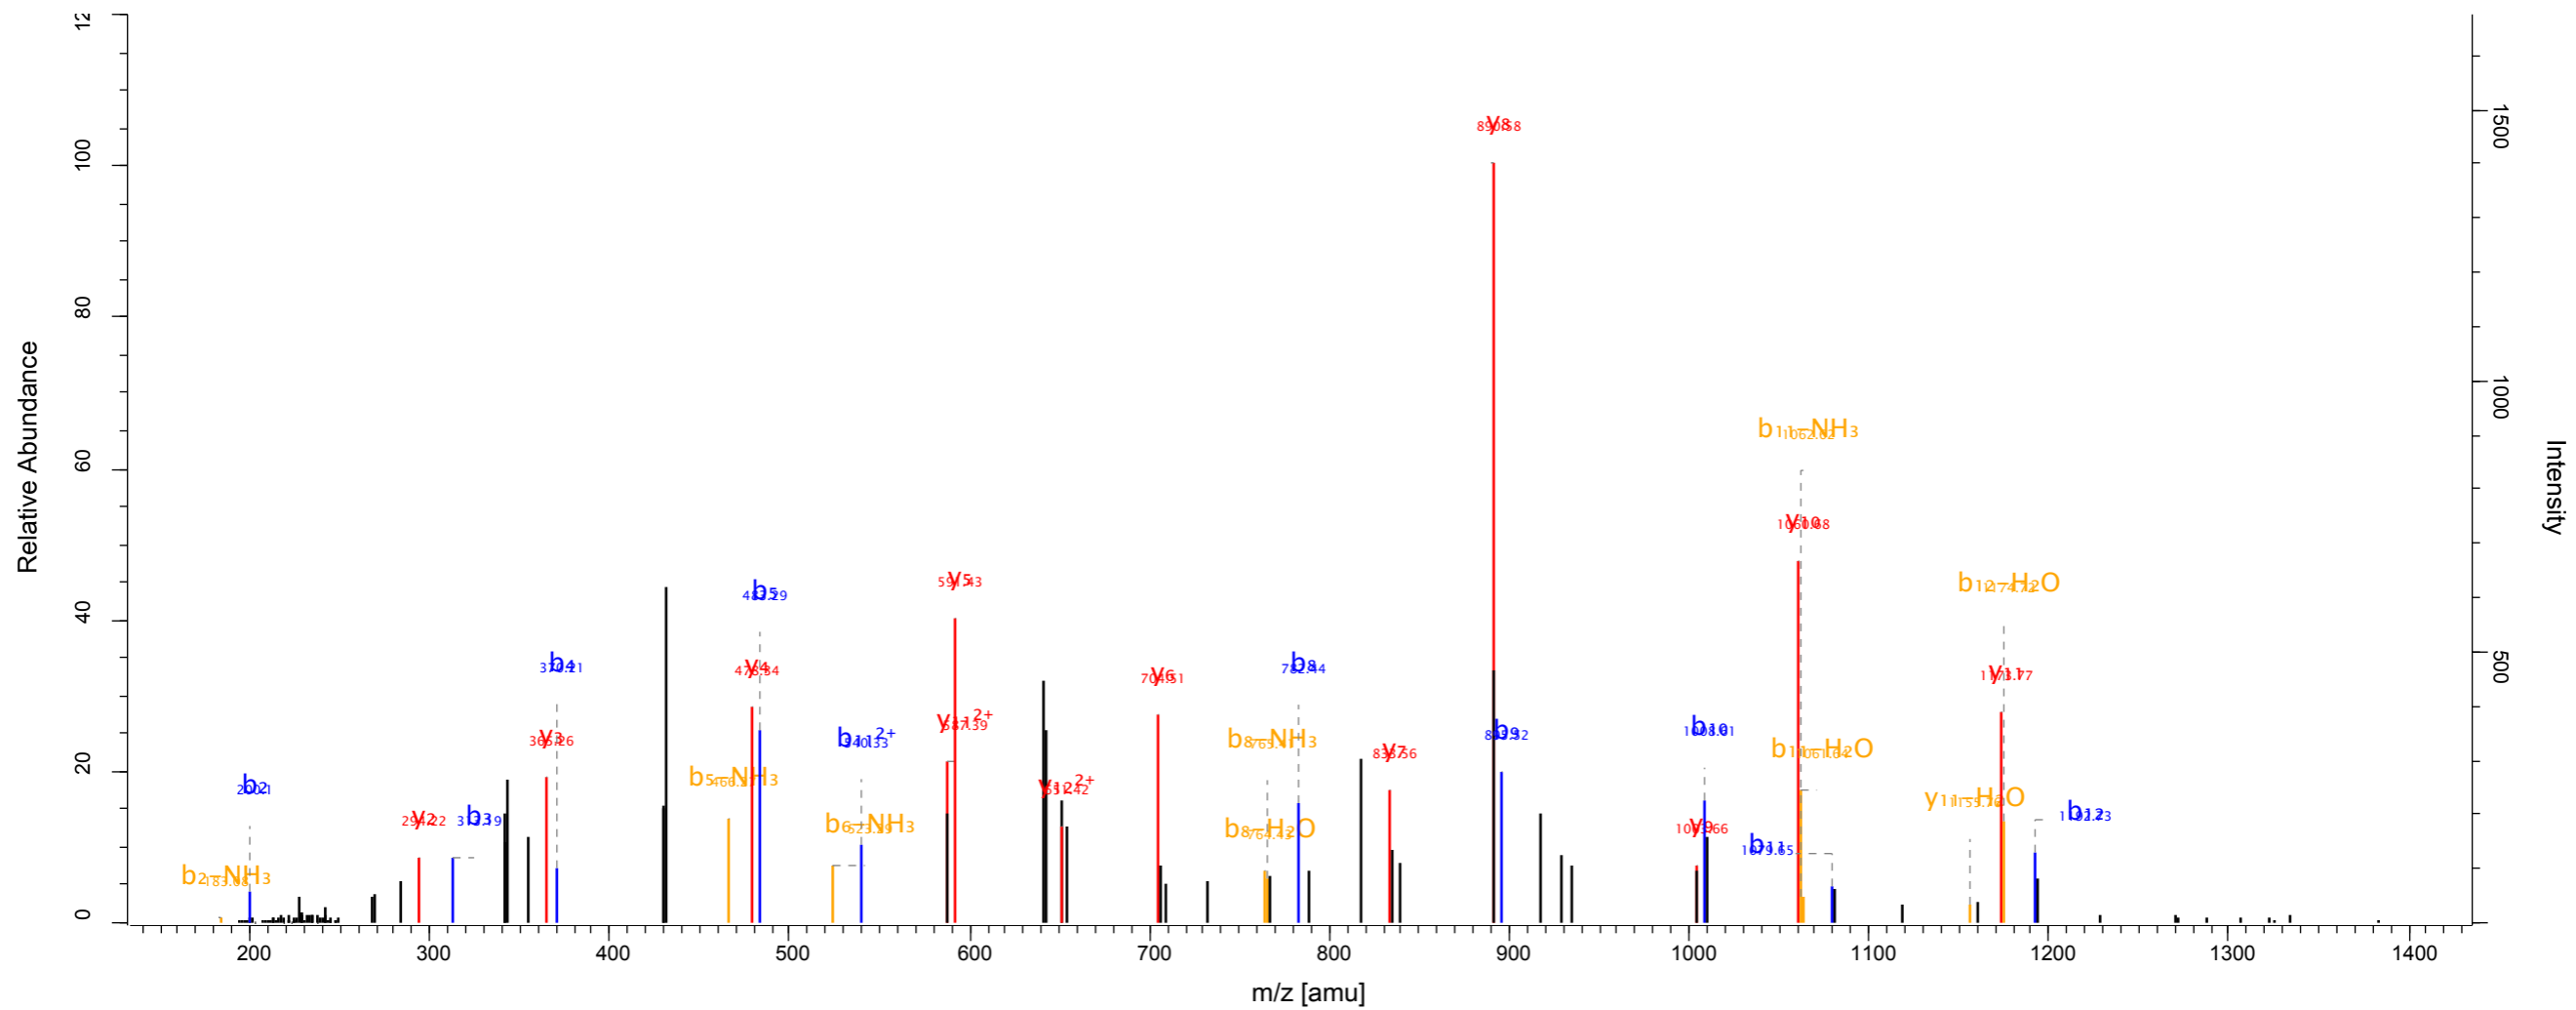

Scan number 8114 Raw file SKaraca\_LMB\_TCE\_Reverse\_281011\_17\_rep1  
 Method ITMS; CID Pepti... 148.26

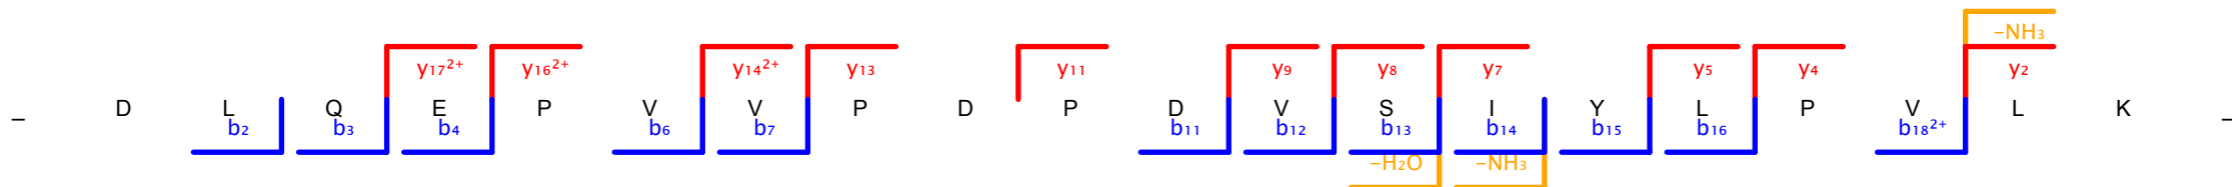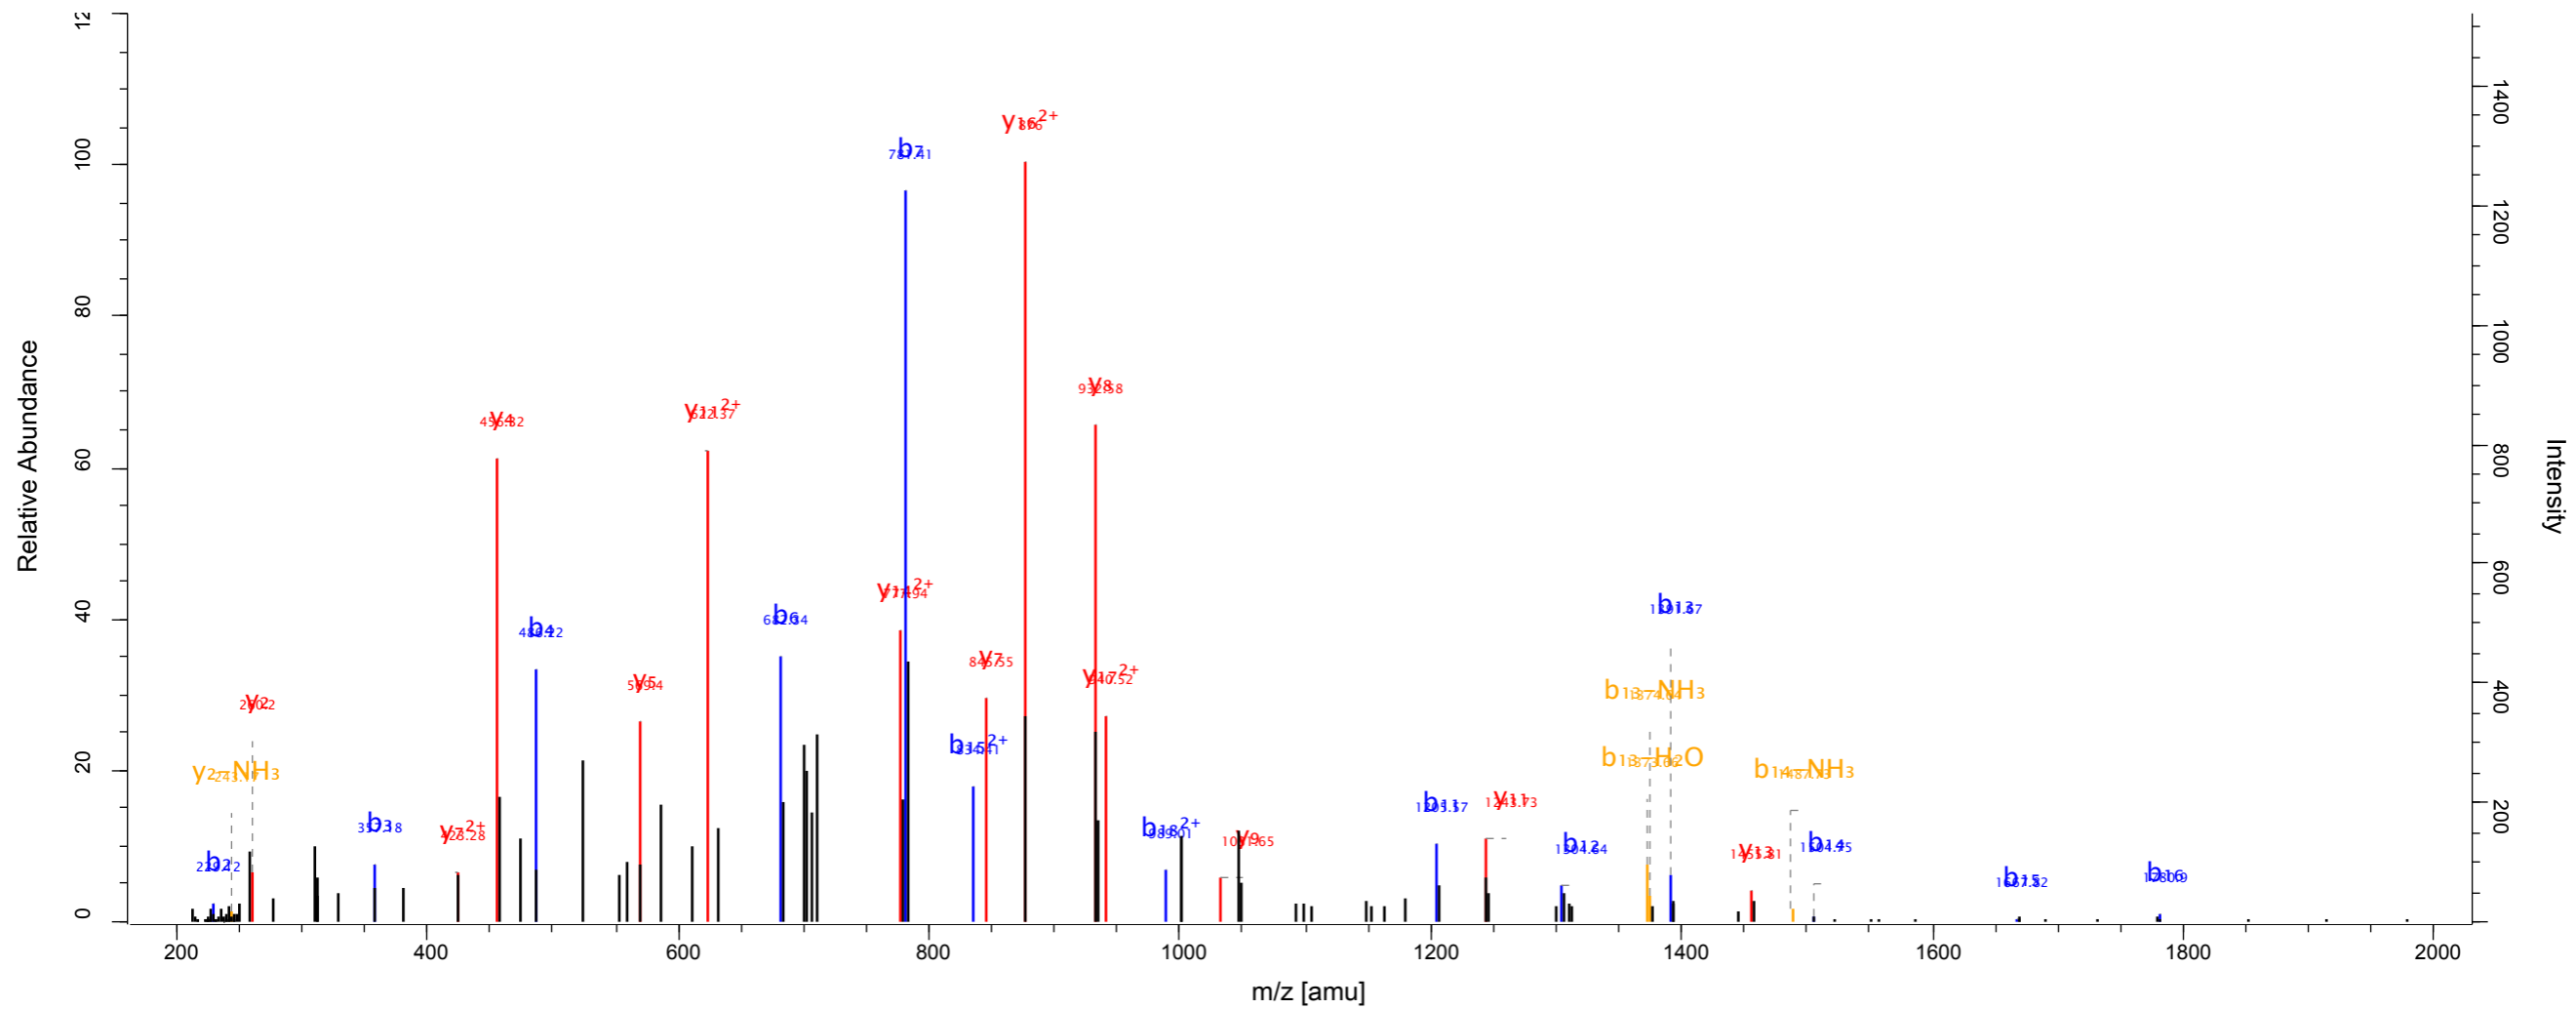



Scan number 8937 Raw file SKaraca\_LMB\_TCE\_Reverse\_281011\_17\_rep1  
 Method ITMS; CID Pepti... 162.22

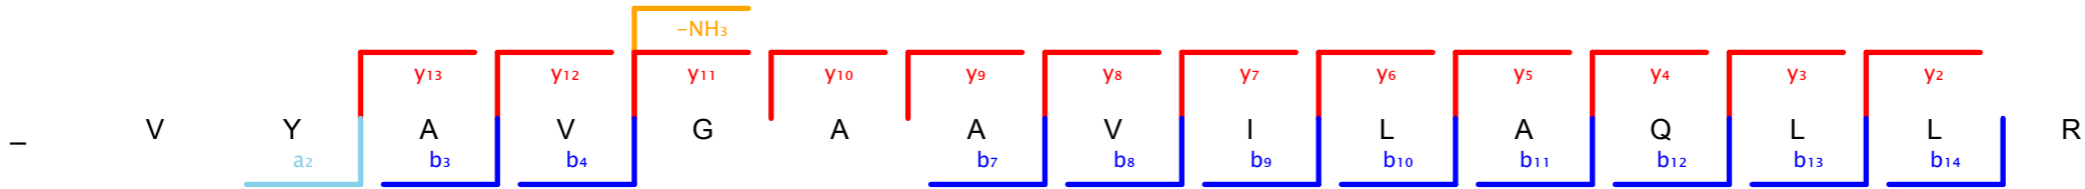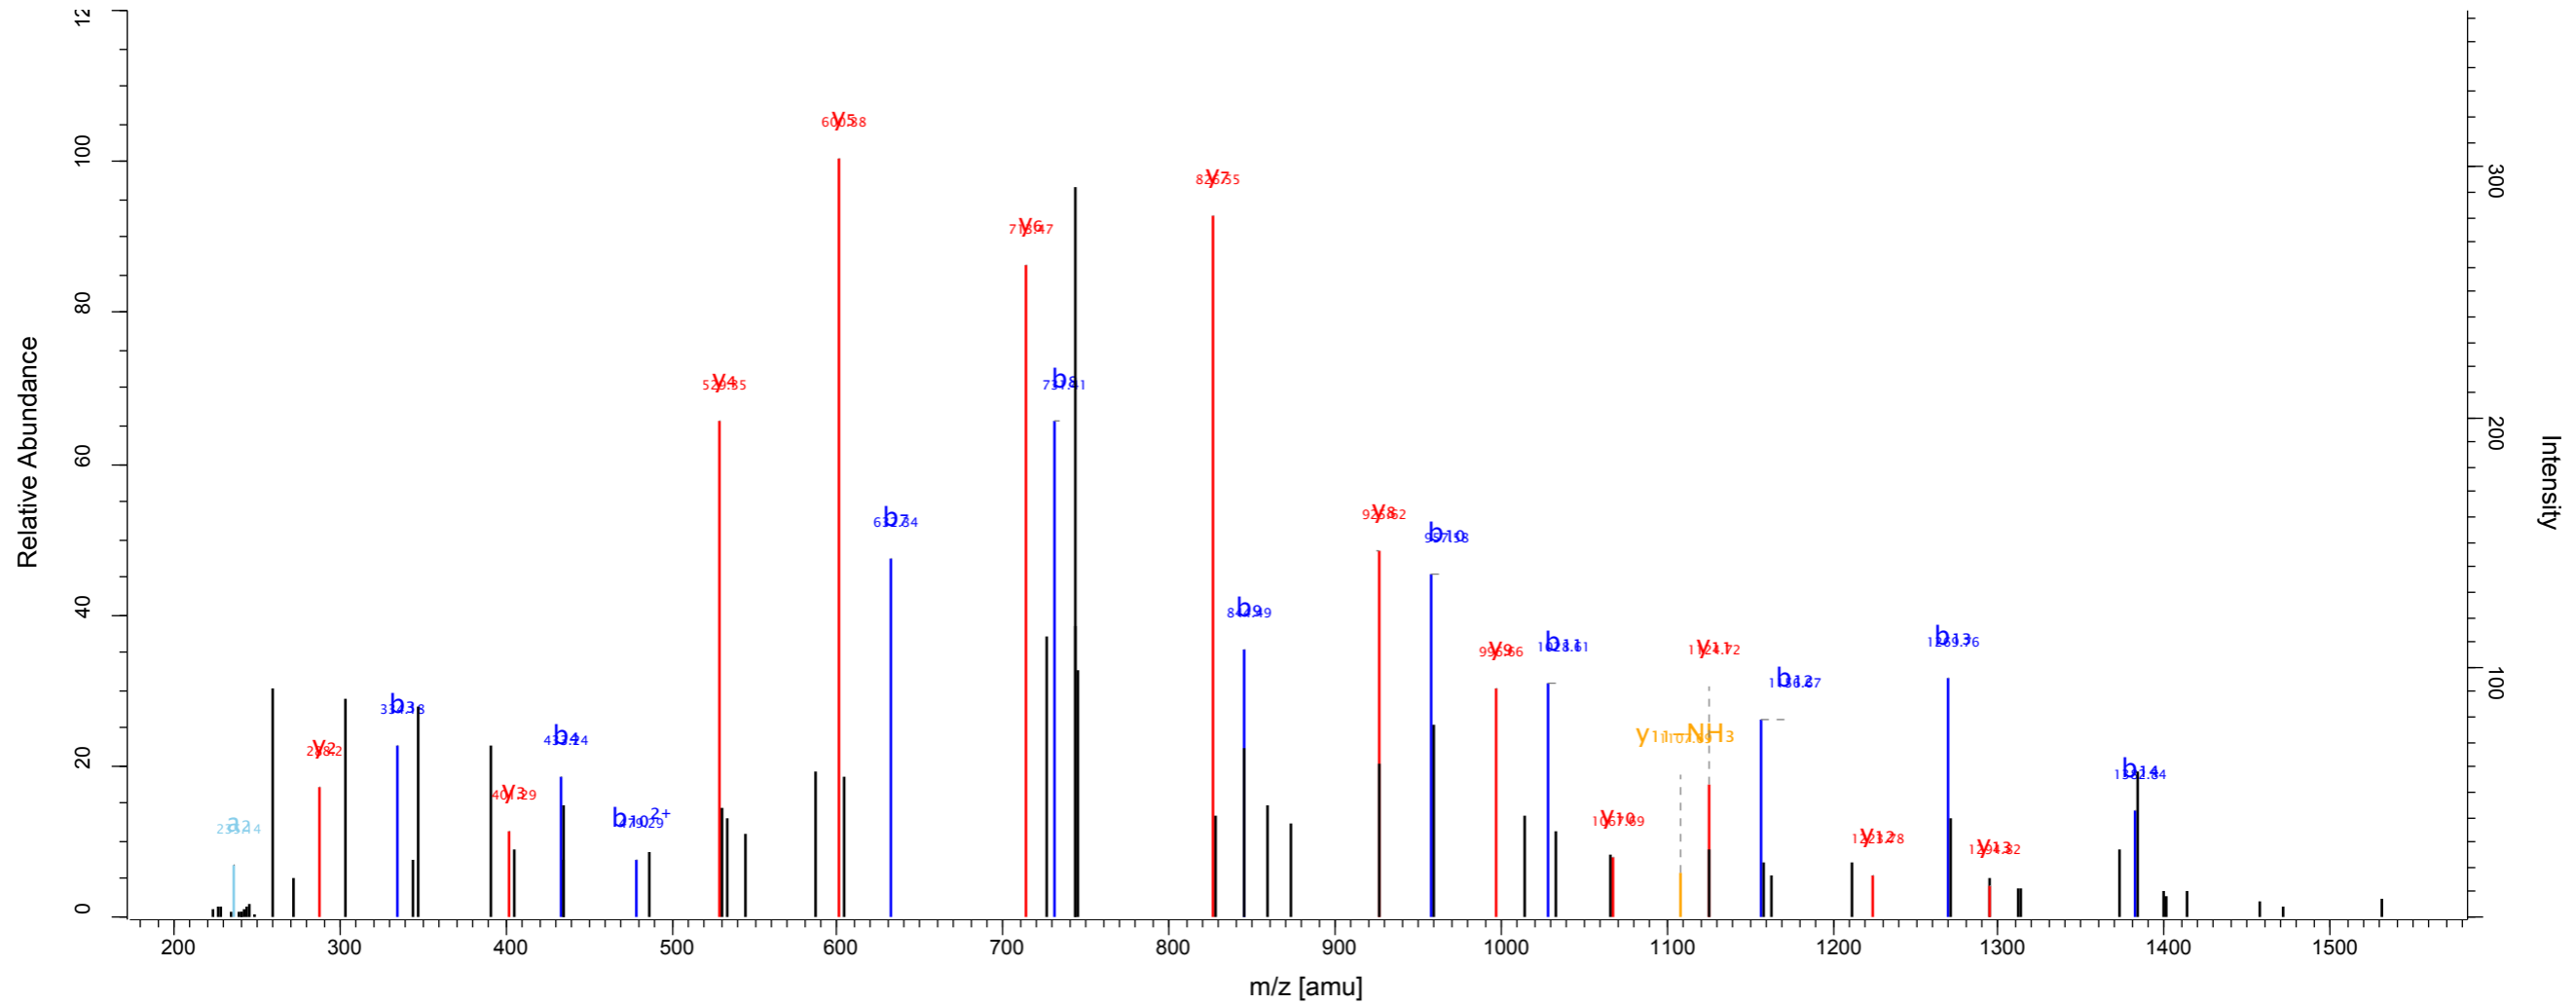

Scan number 9040 Raw file SKaraca\_LMB\_TCE\_Reverse\_281011\_17\_rep1  
 Method ITMS; CID Pepti... 169.28

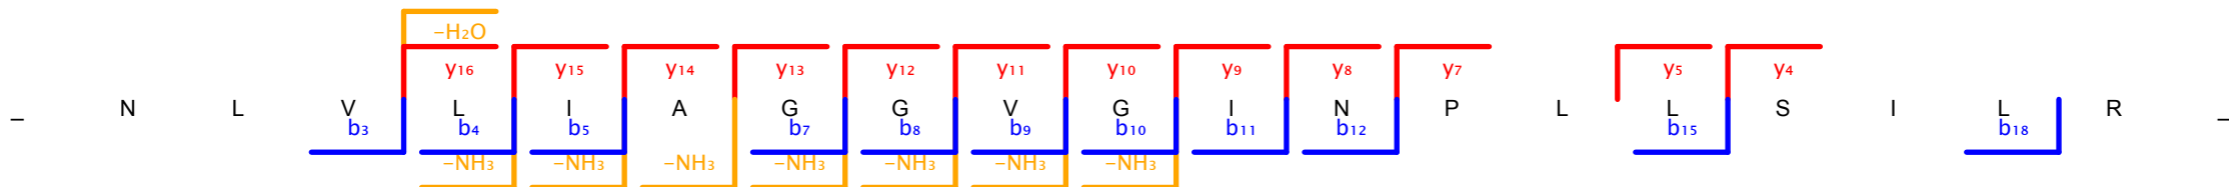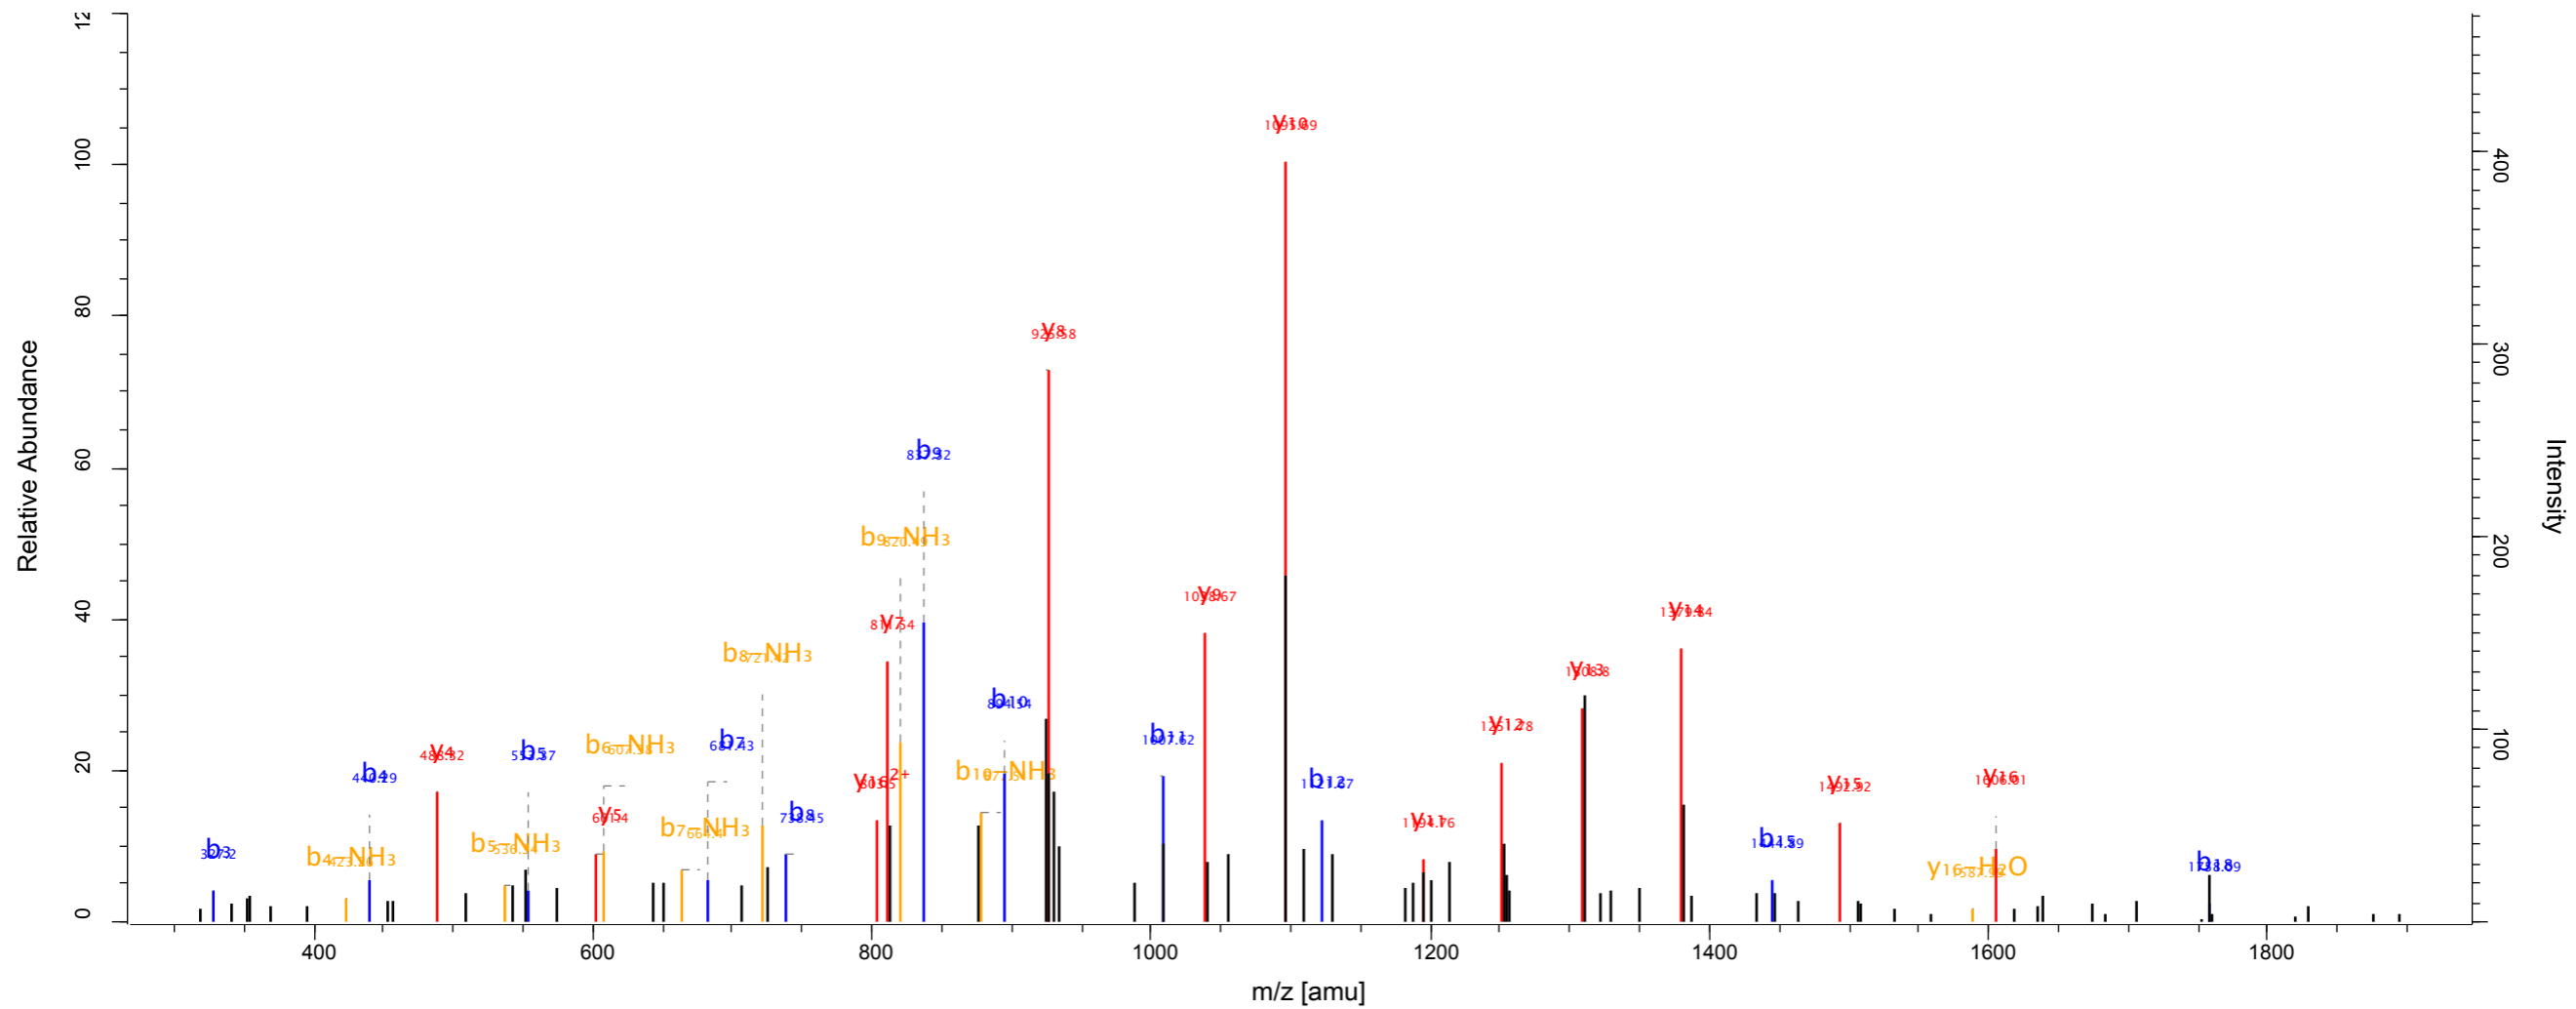

|             |           |          |                                        |
|-------------|-----------|----------|----------------------------------------|
| Scan number | 7643      | Raw file | SKaraca_LMB_TCE_Reverse_281011_17_rep2 |
| Method      | ITMS; CID | Pepti... | 85.94                                  |

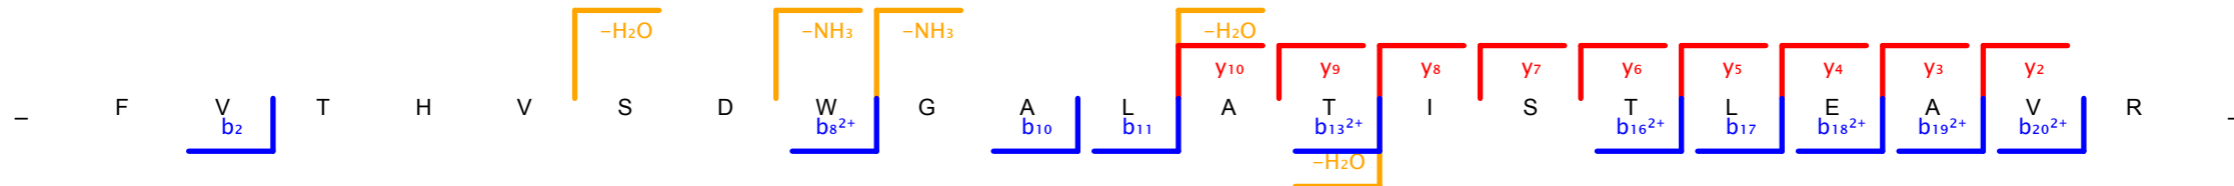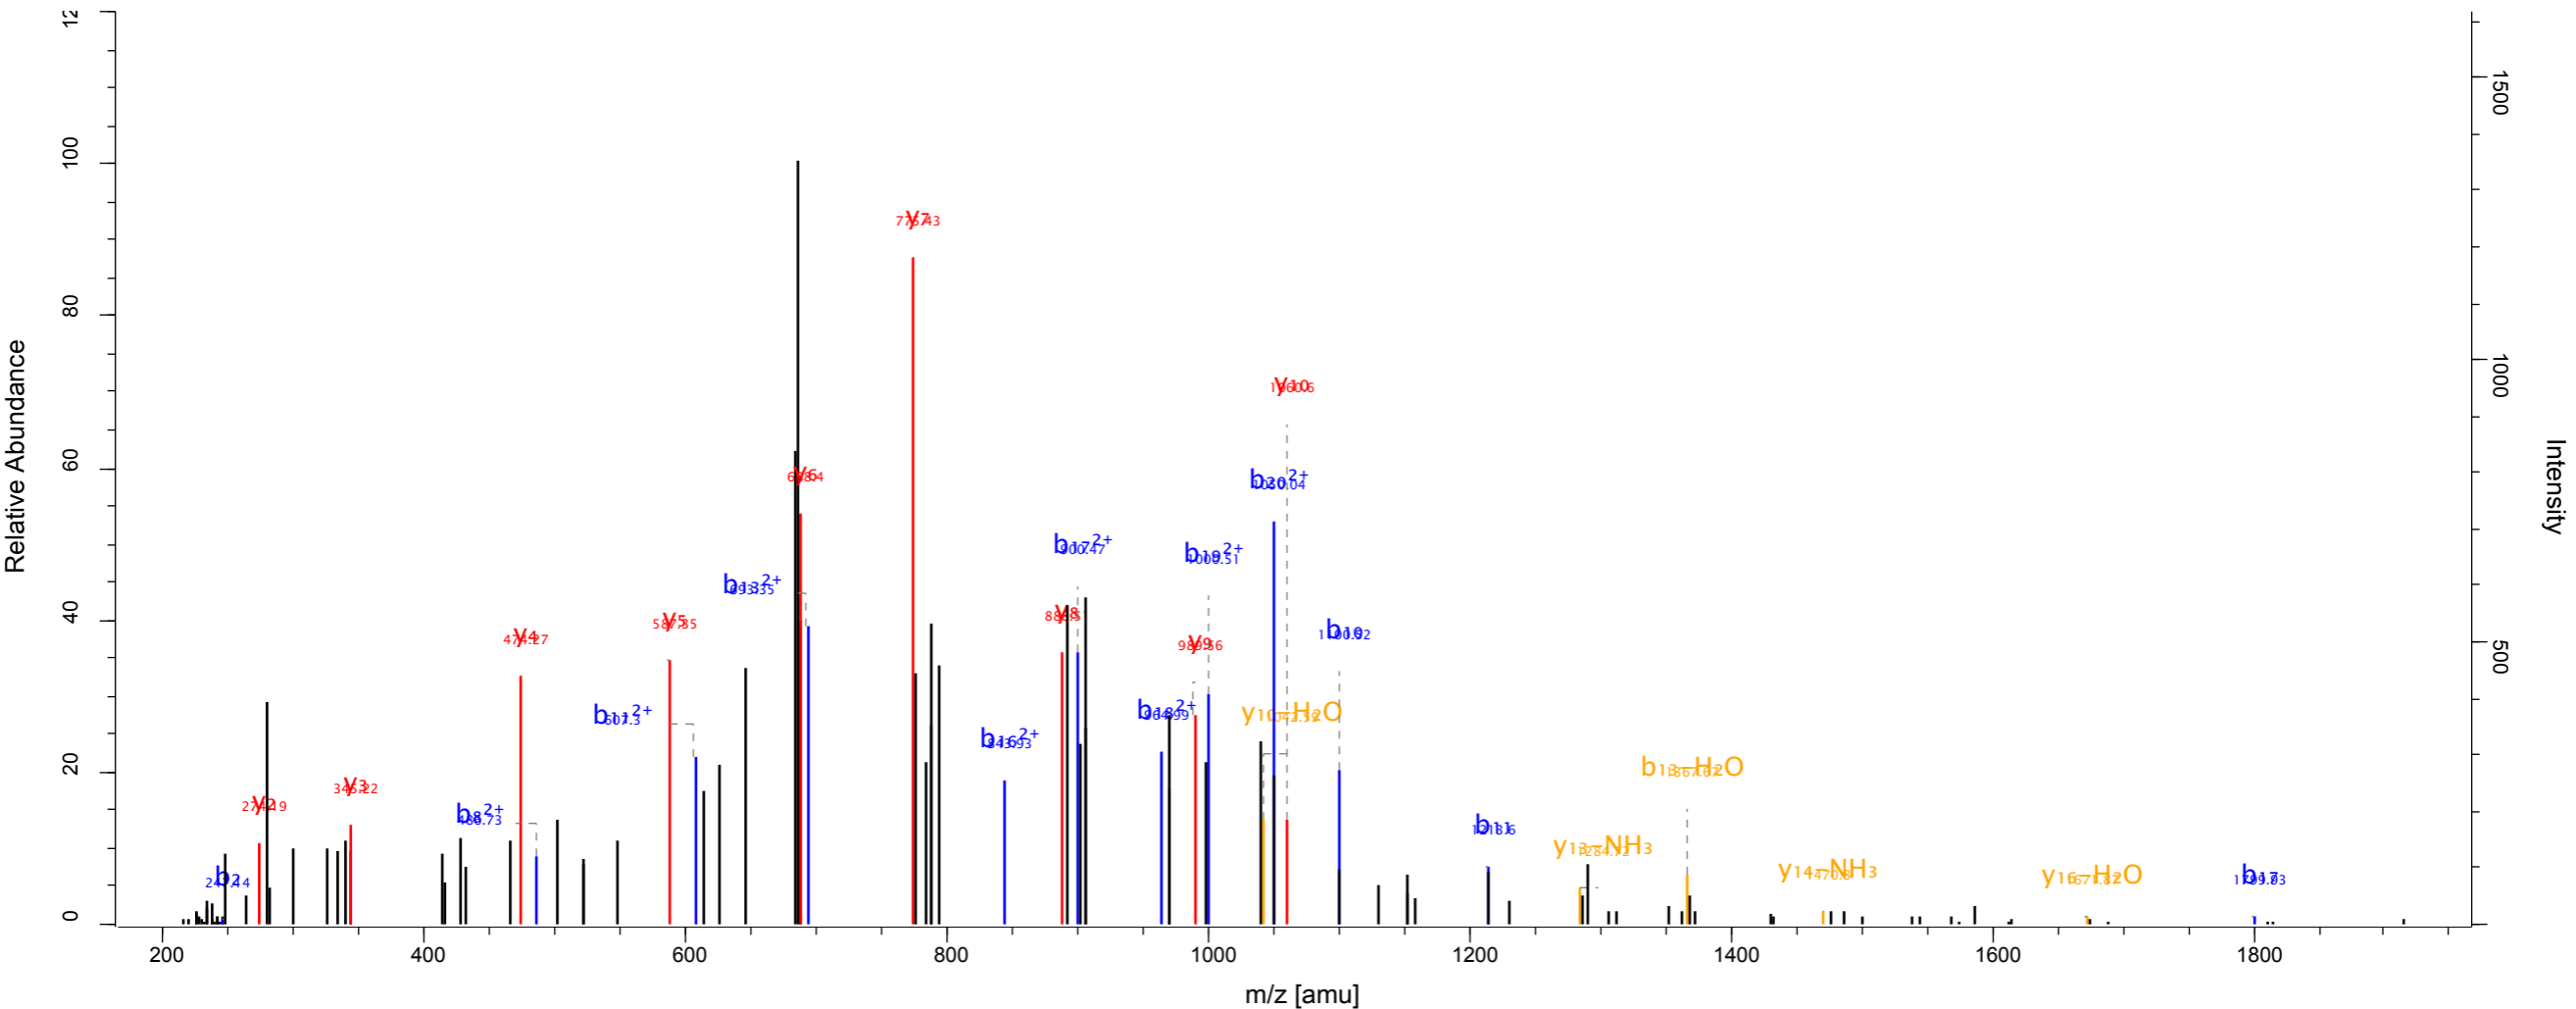

|             |           |          |                                        |
|-------------|-----------|----------|----------------------------------------|
| Scan number | 5920      | Raw file | SKaraca_LMB_TCE_Reverse_281011_18_rep1 |
| Method      | ITMS; CID | Pepti... | 105.67                                 |

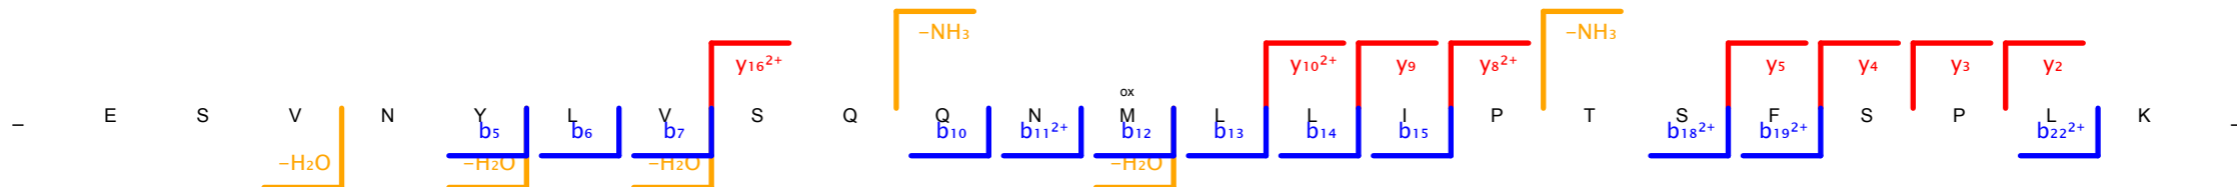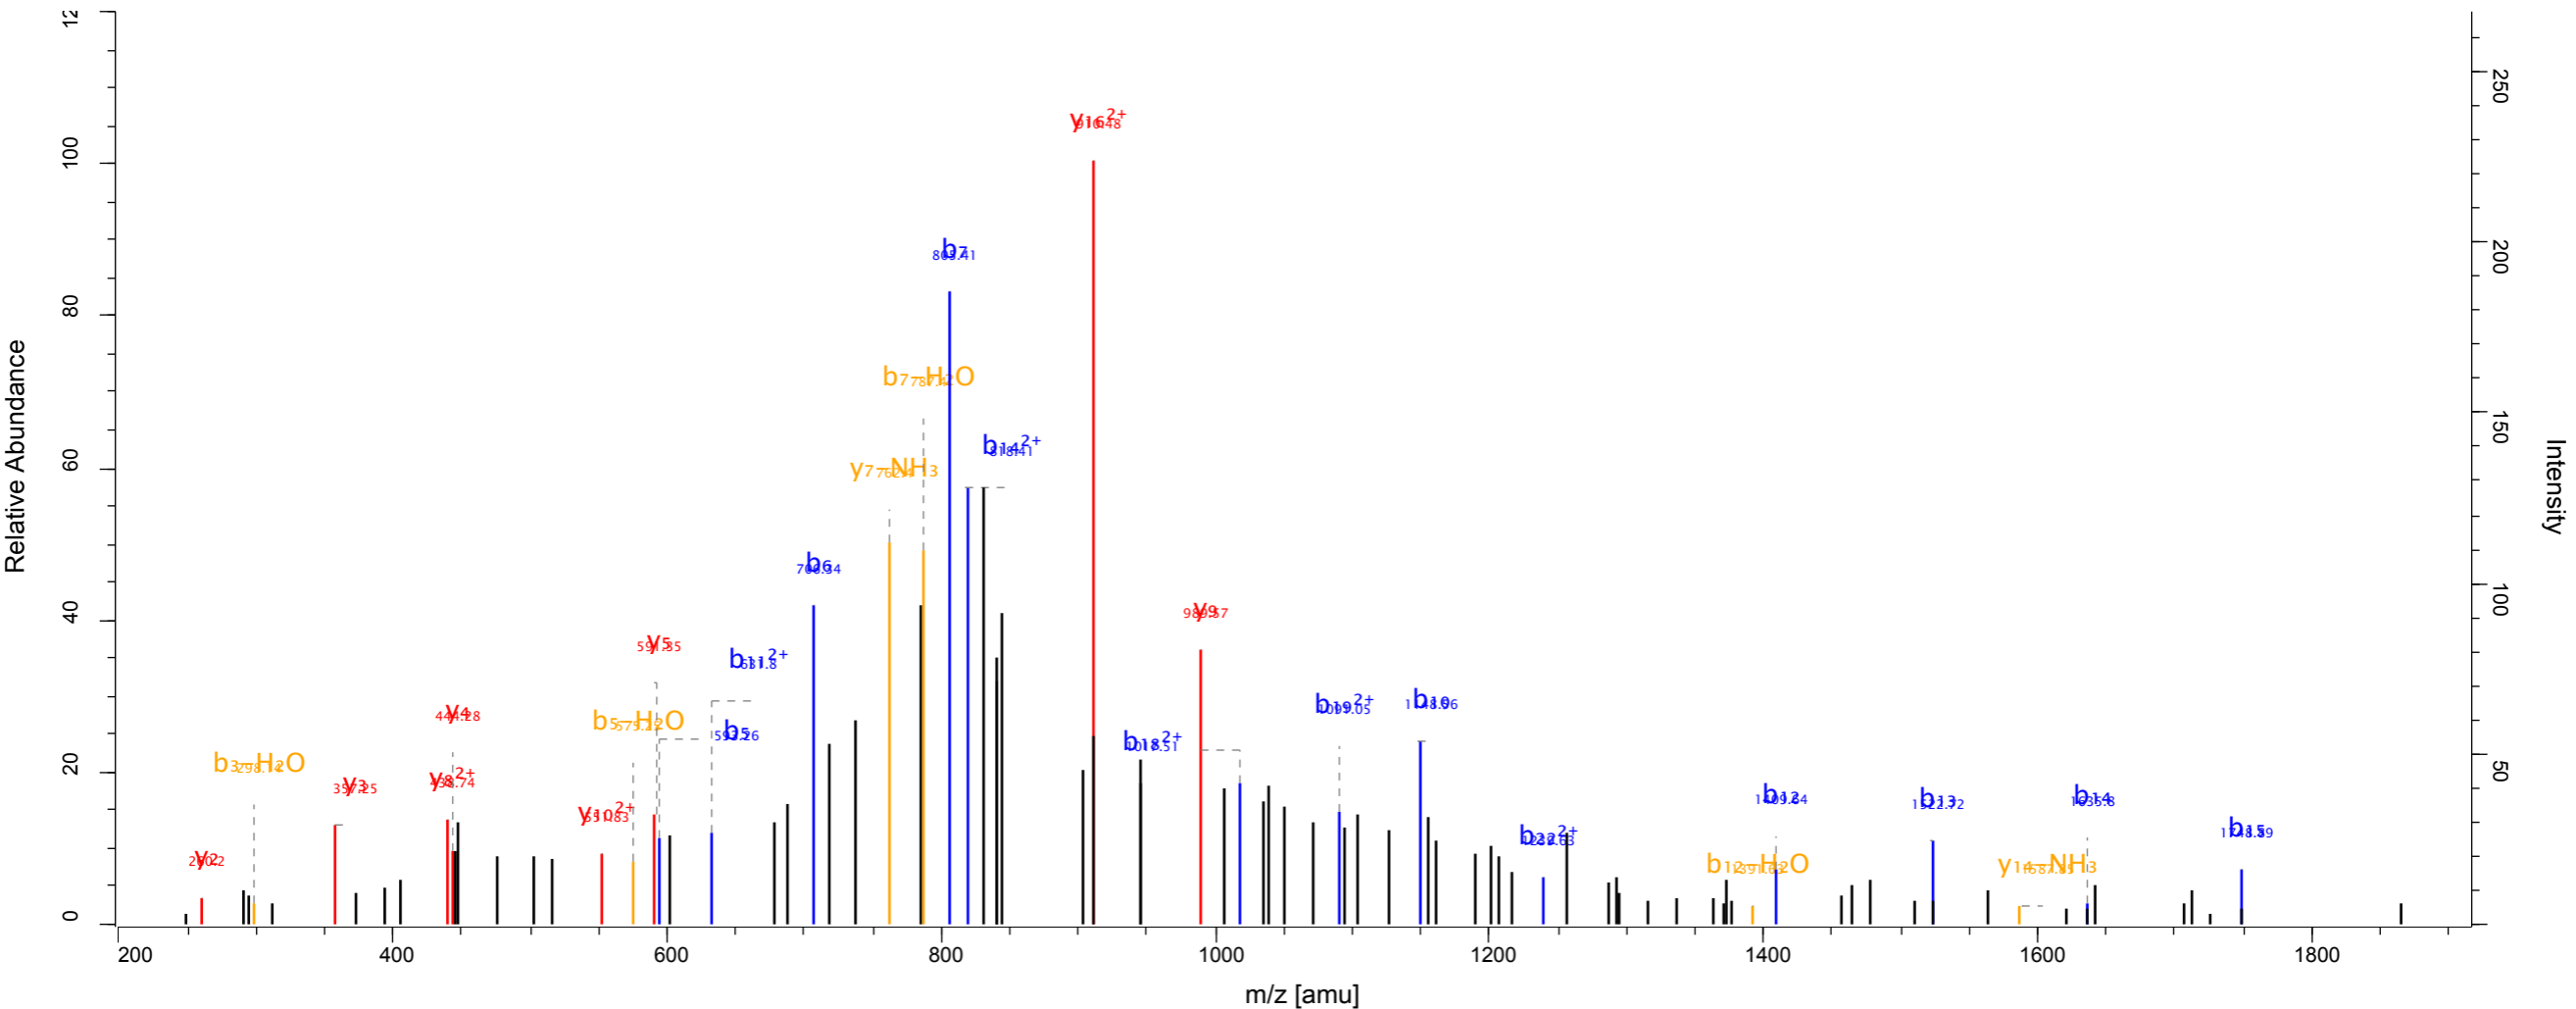

|             |           |          |                                        |
|-------------|-----------|----------|----------------------------------------|
| Scan number | 2506      | Raw file | SKaraca_LMB_TCE_Reverse_281011_18_rep2 |
| Method      | ITMS; CID | Pepti... | 163.38                                 |

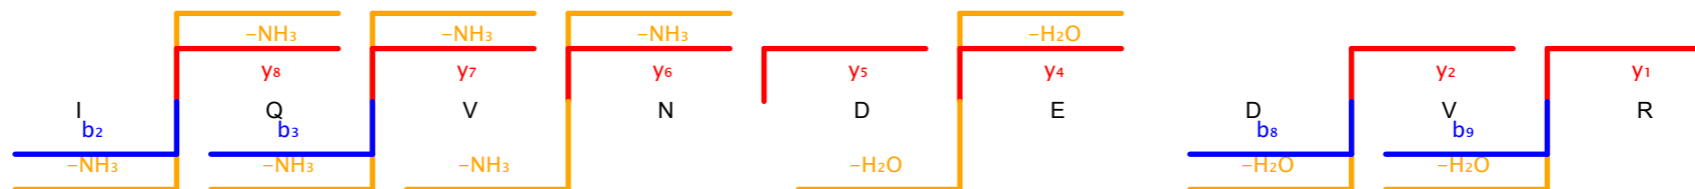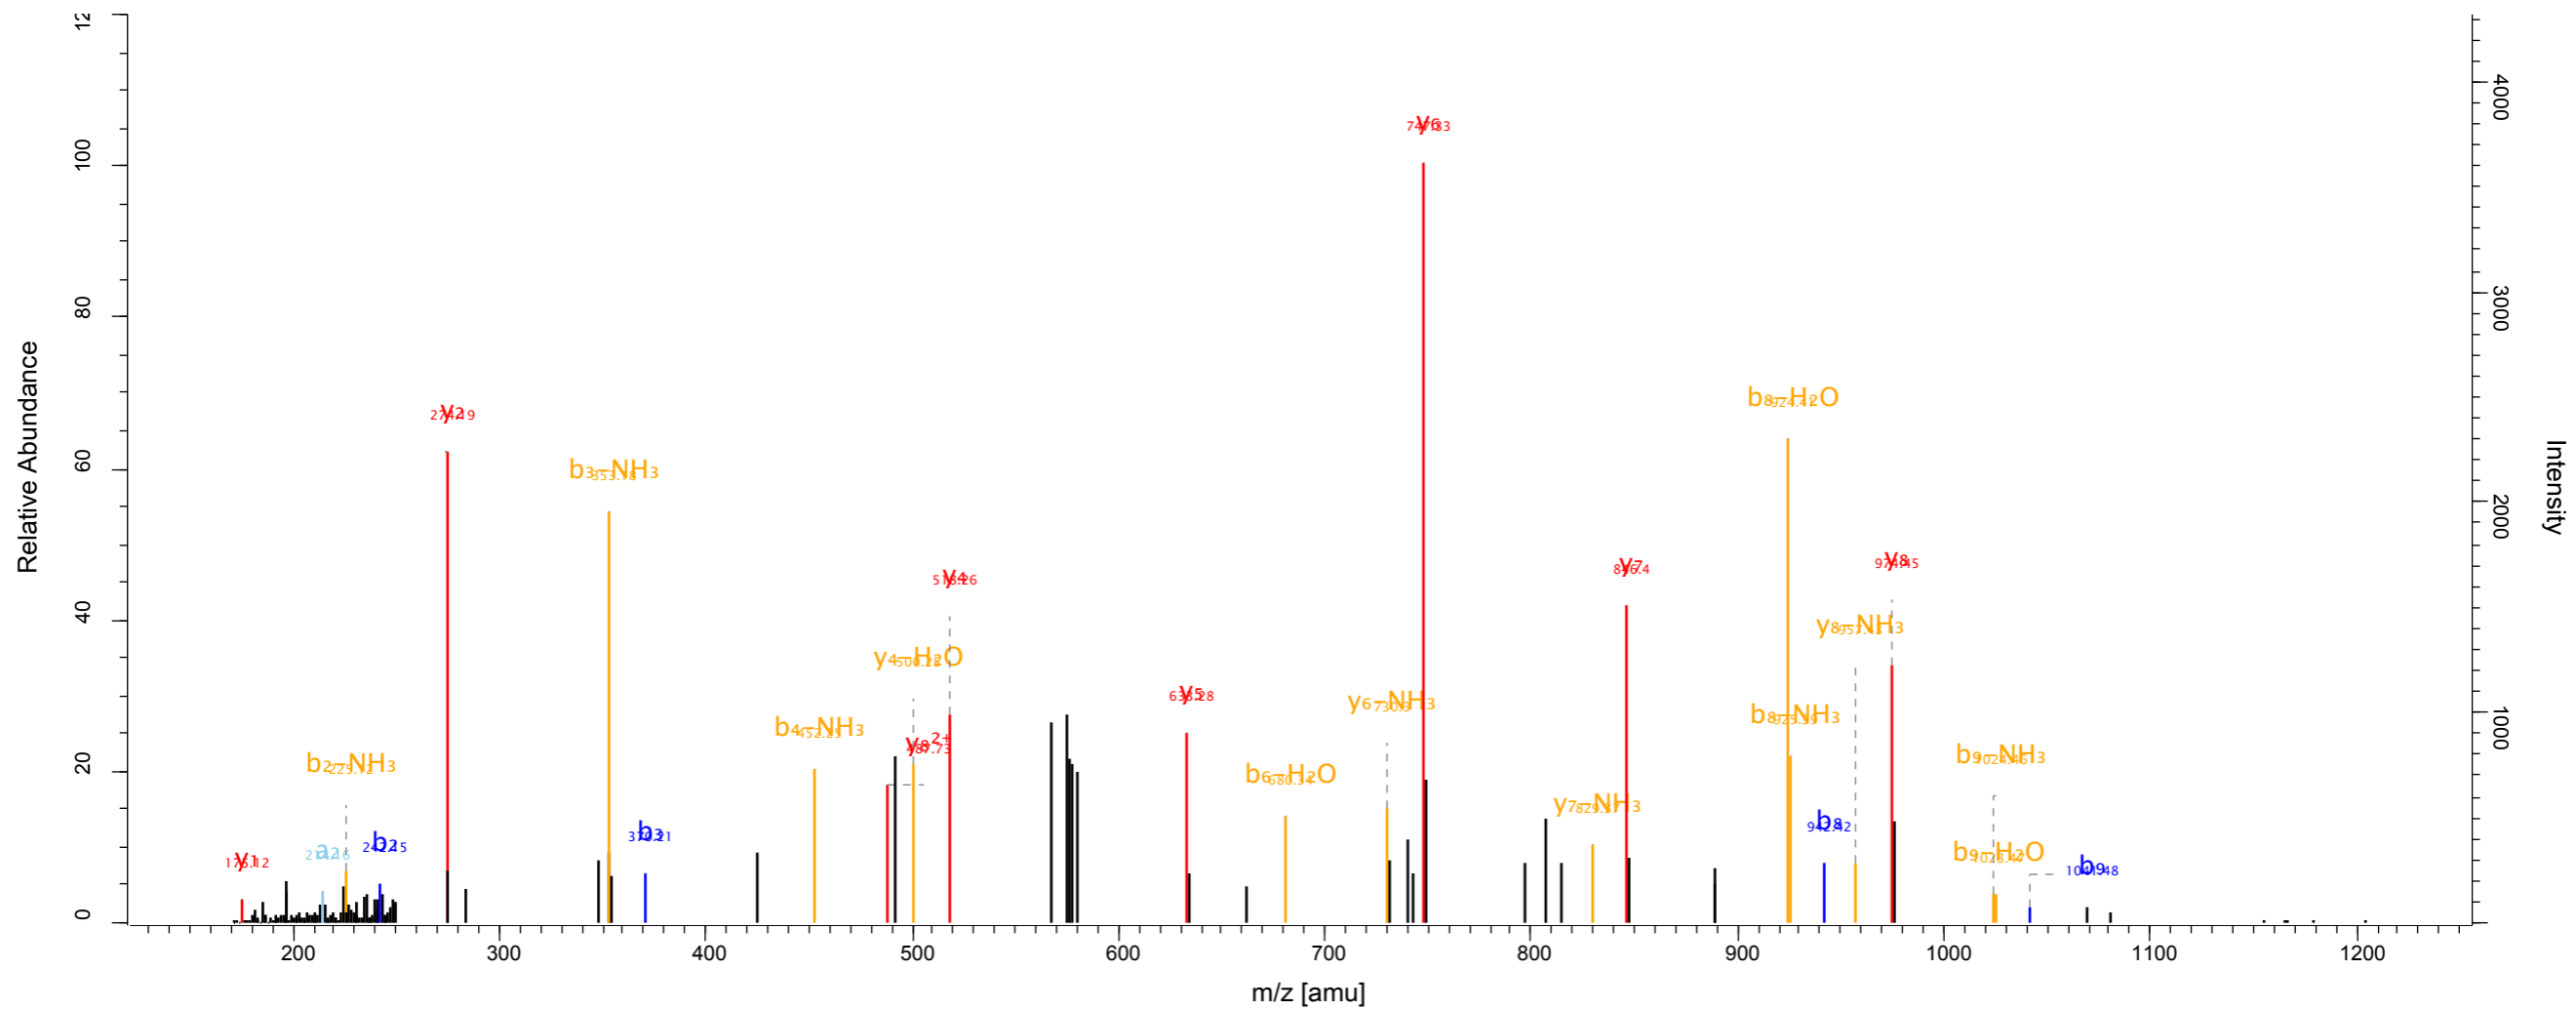

|             |           |          |                                        |
|-------------|-----------|----------|----------------------------------------|
| Scan number | 6040      | Raw file | SKaraca_LMB_TCE_Reverse_281011_18_rep2 |
| Method      | ITMS; CID | Pepti... | 117.52                                 |

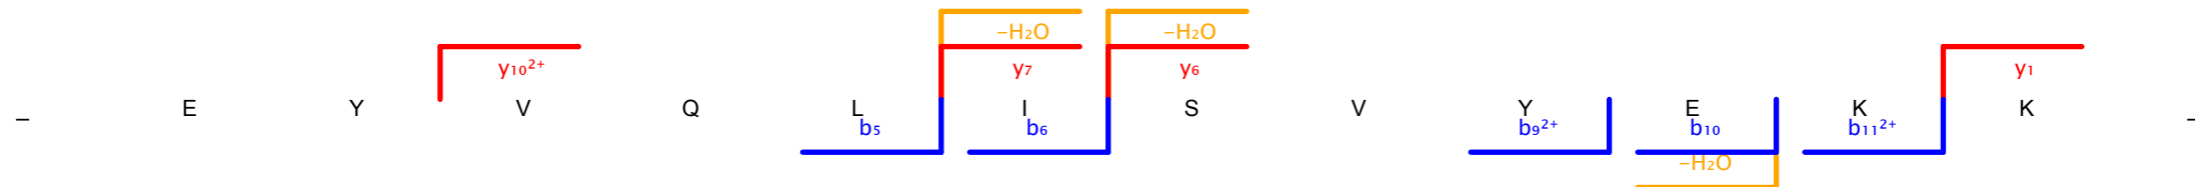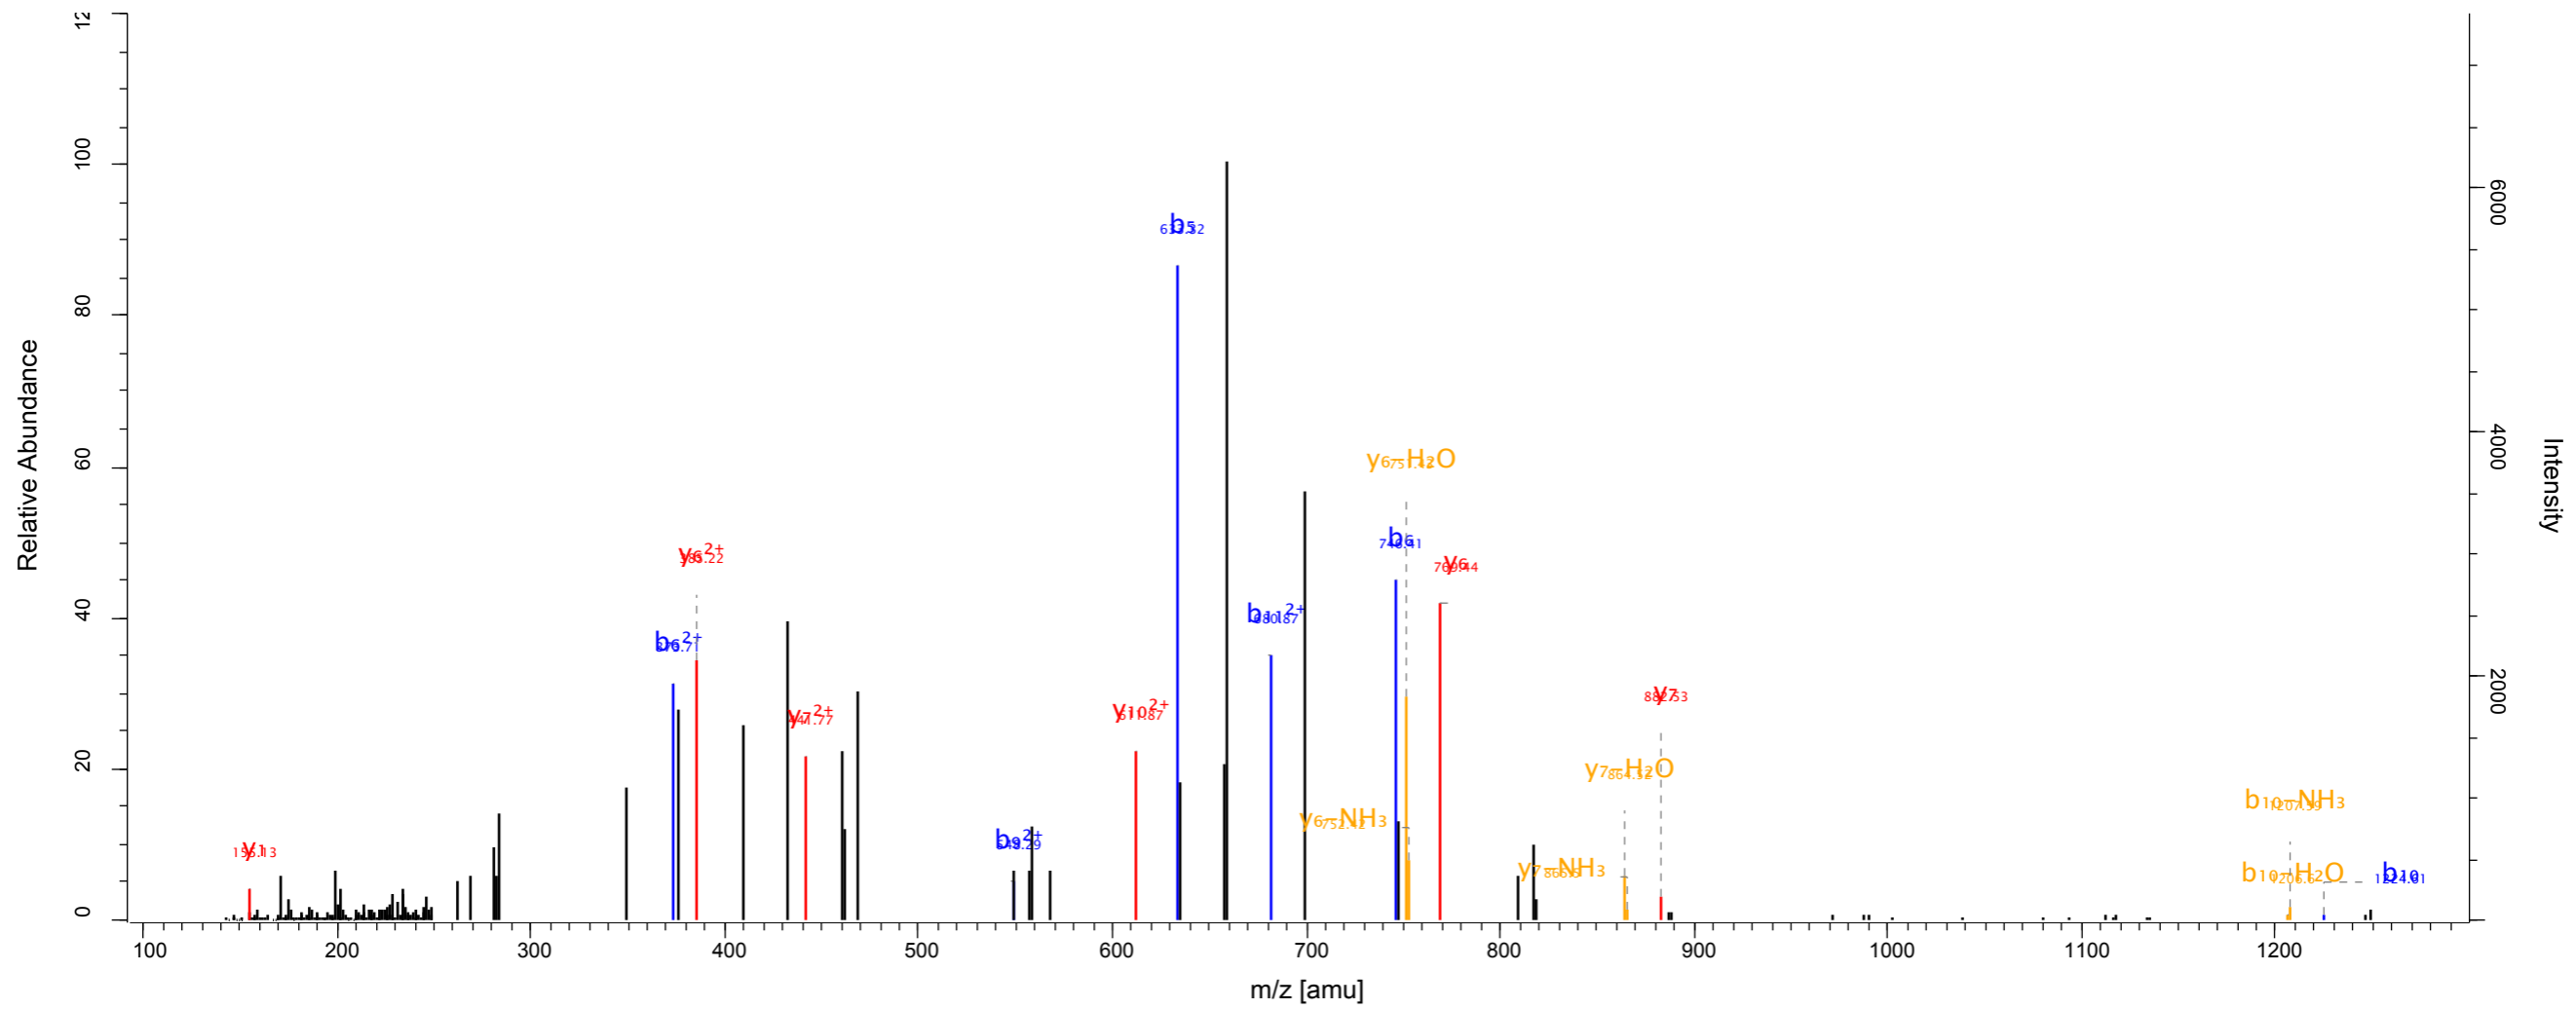

Scan number 6603 Raw file SKaraca\_LMB\_TCE\_Reverse\_281011\_18\_rep2  
 Method ITMS; CID Pepti... 232.78

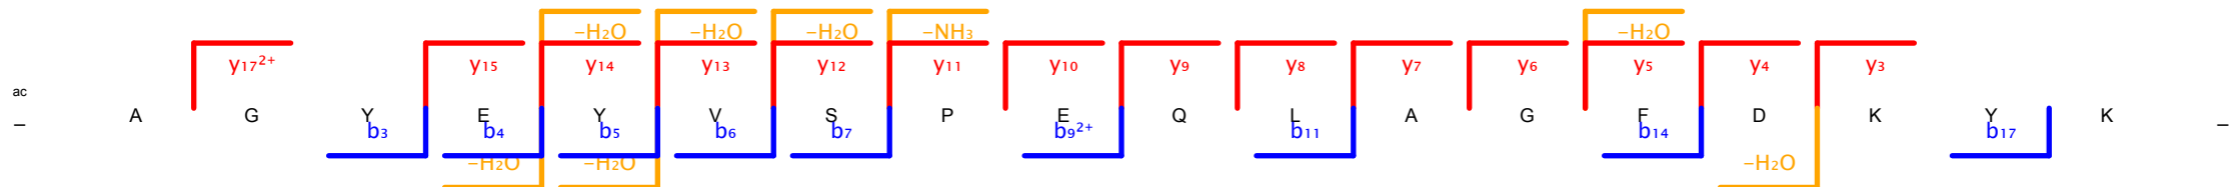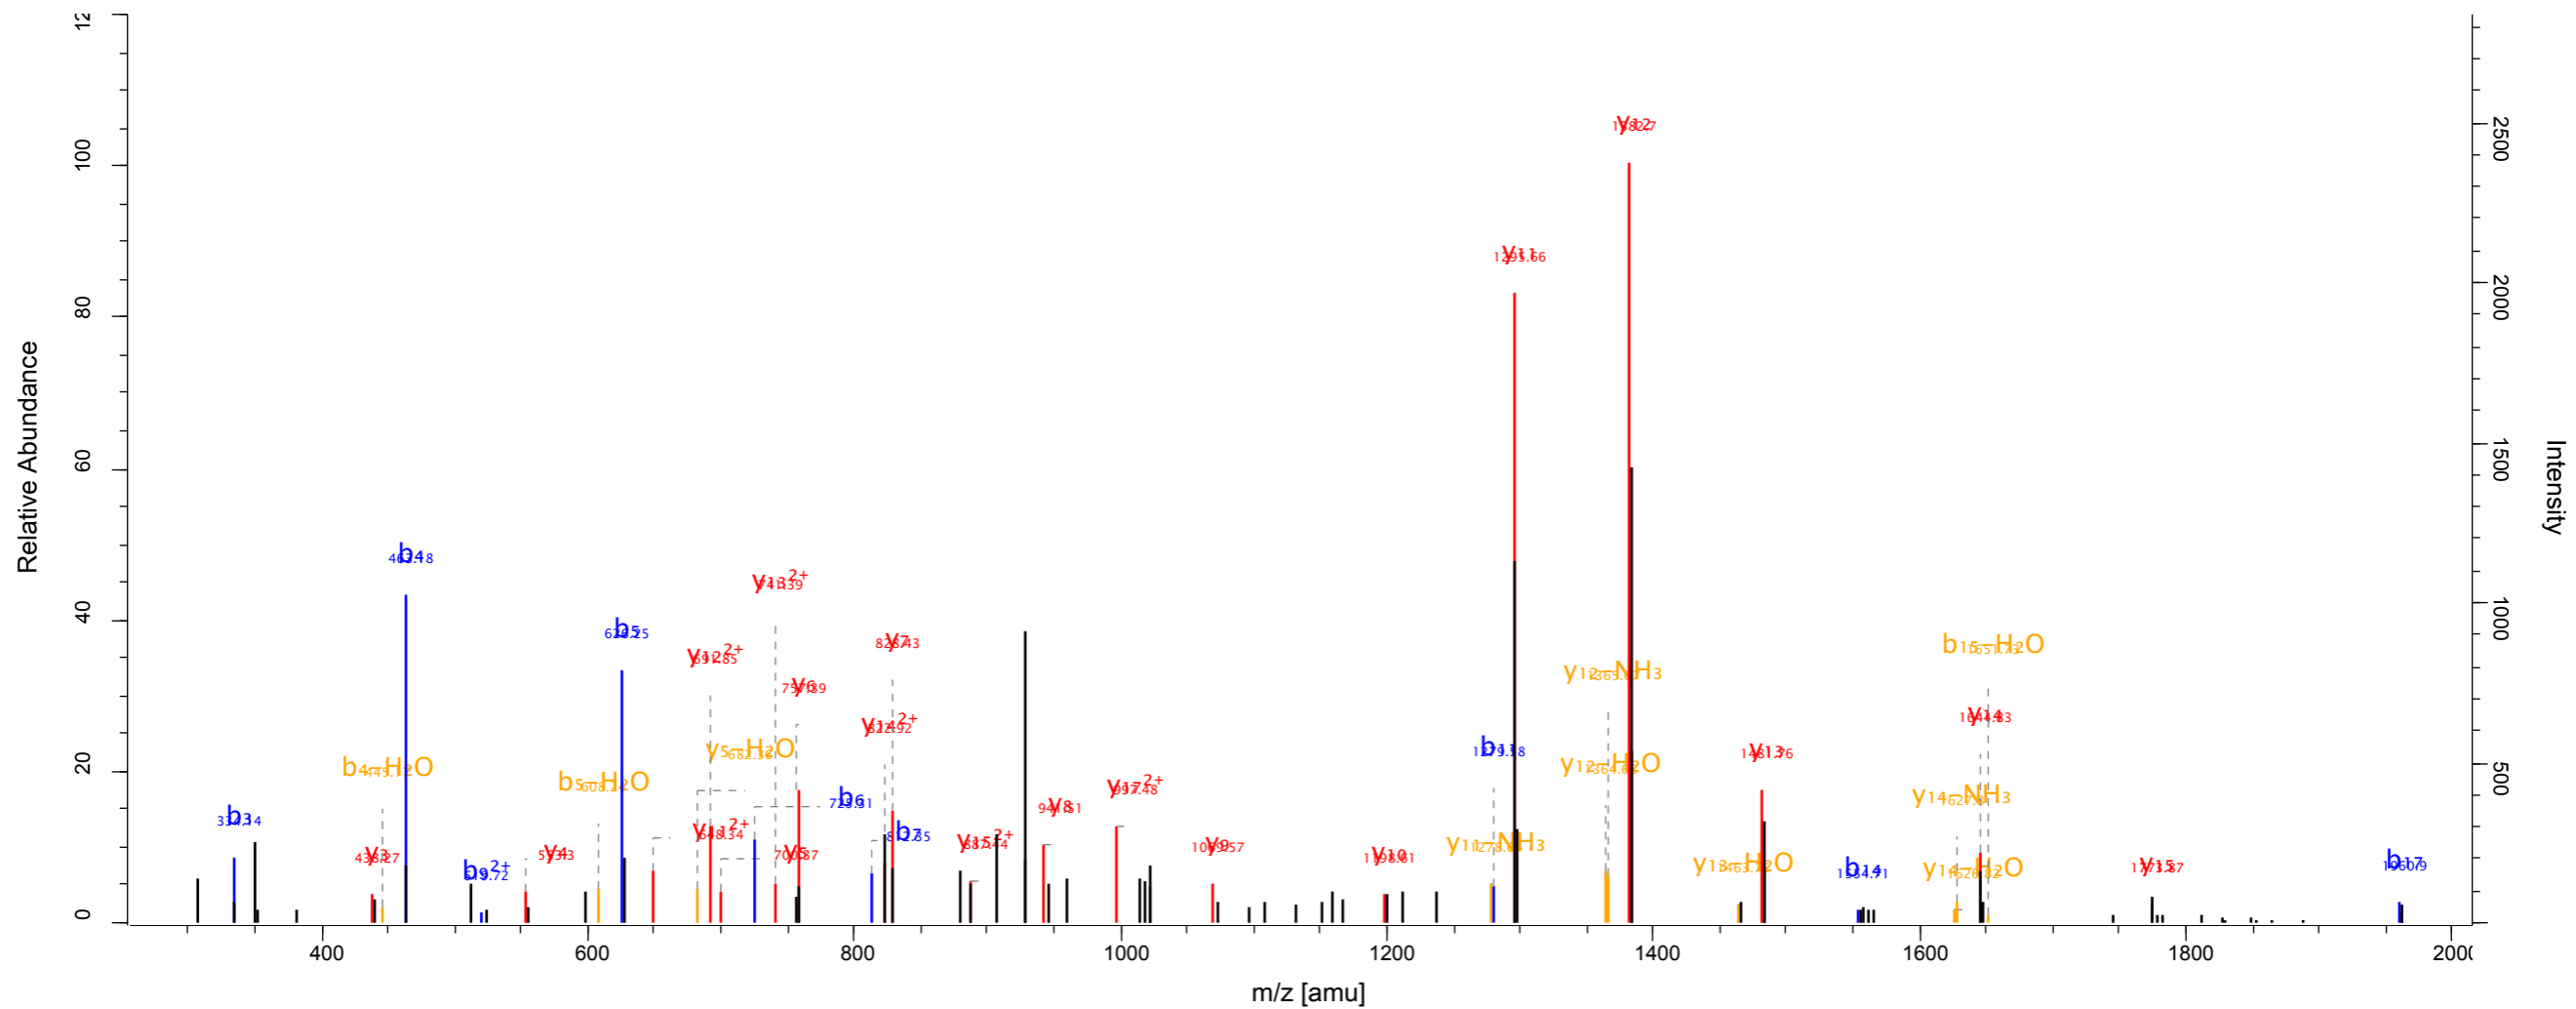

Scan number 2578 Raw file SKaraca\_LMB\_TCE\_Reverse\_281011\_18\_rep3  
 Method ITMS; CID Pepti... 138.46

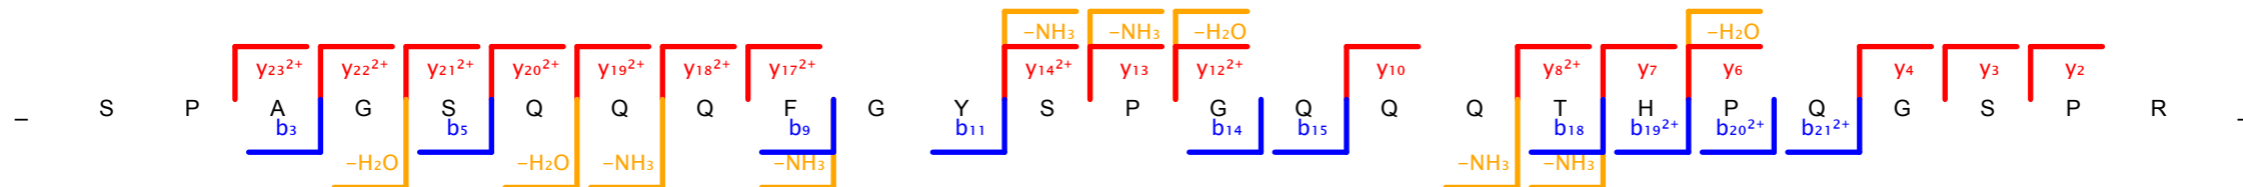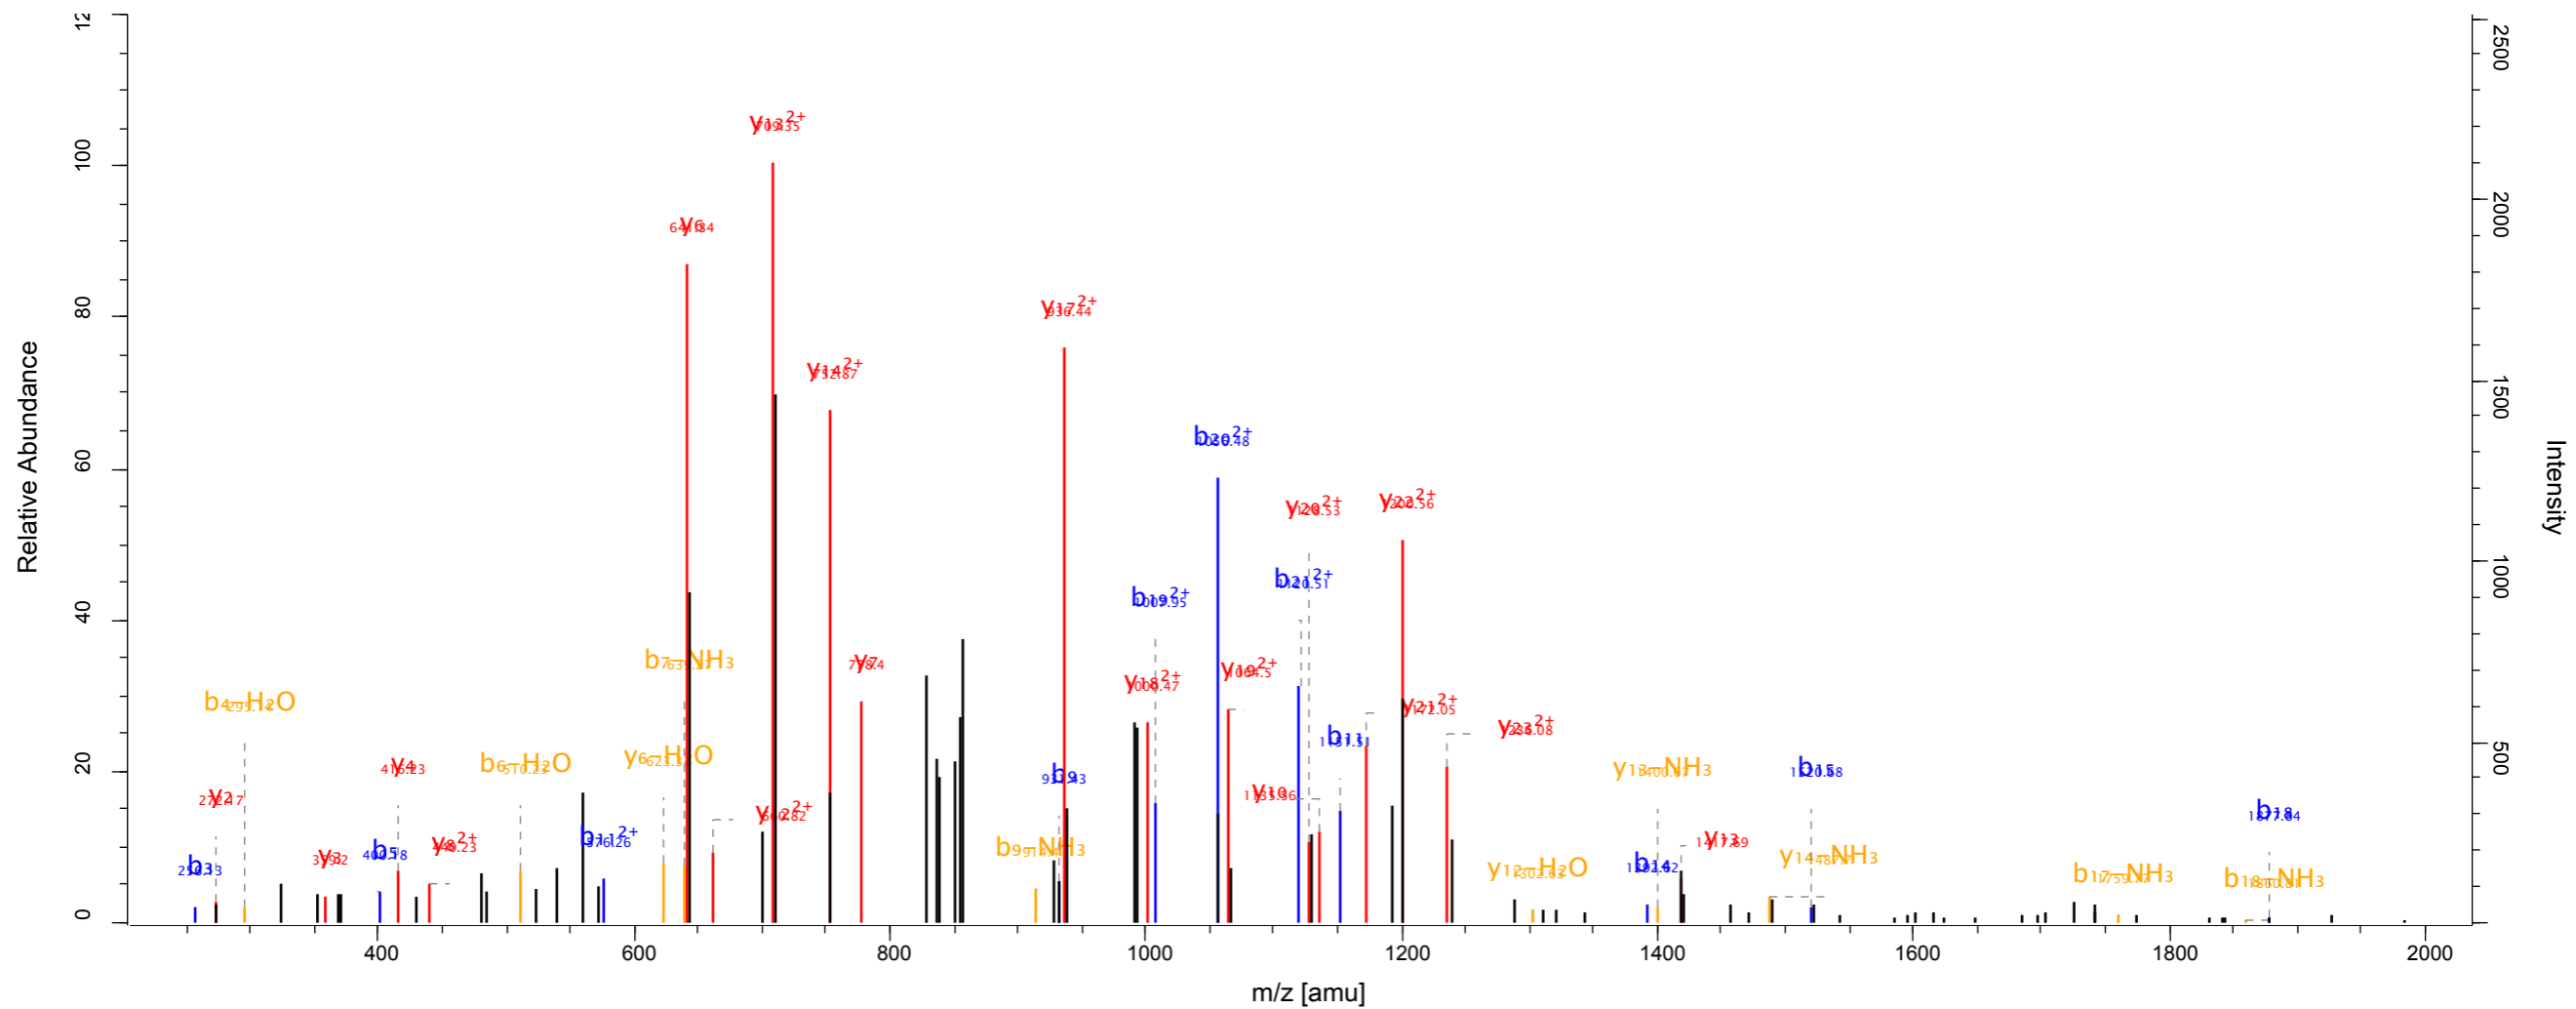



Scan number 7821  
Method ITMS; CID

Raw file SKaraca\_LMB\_TCE\_Reverse\_281011\_18\_rep3  
Pepti... 89.34

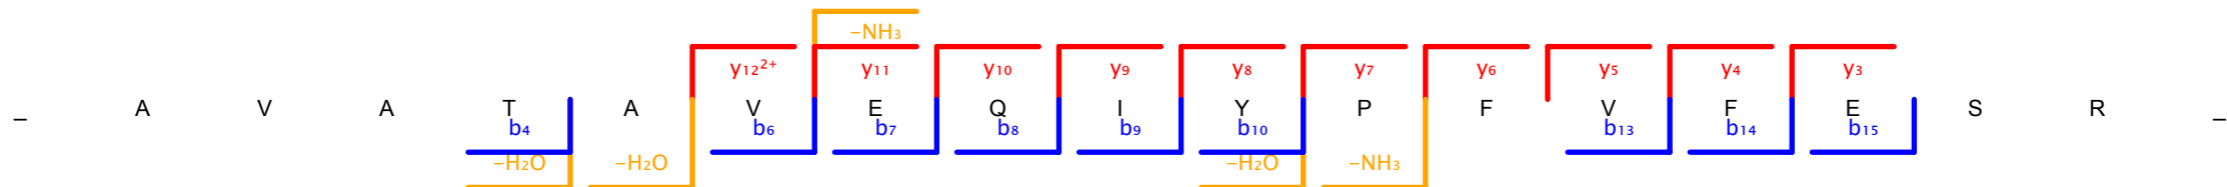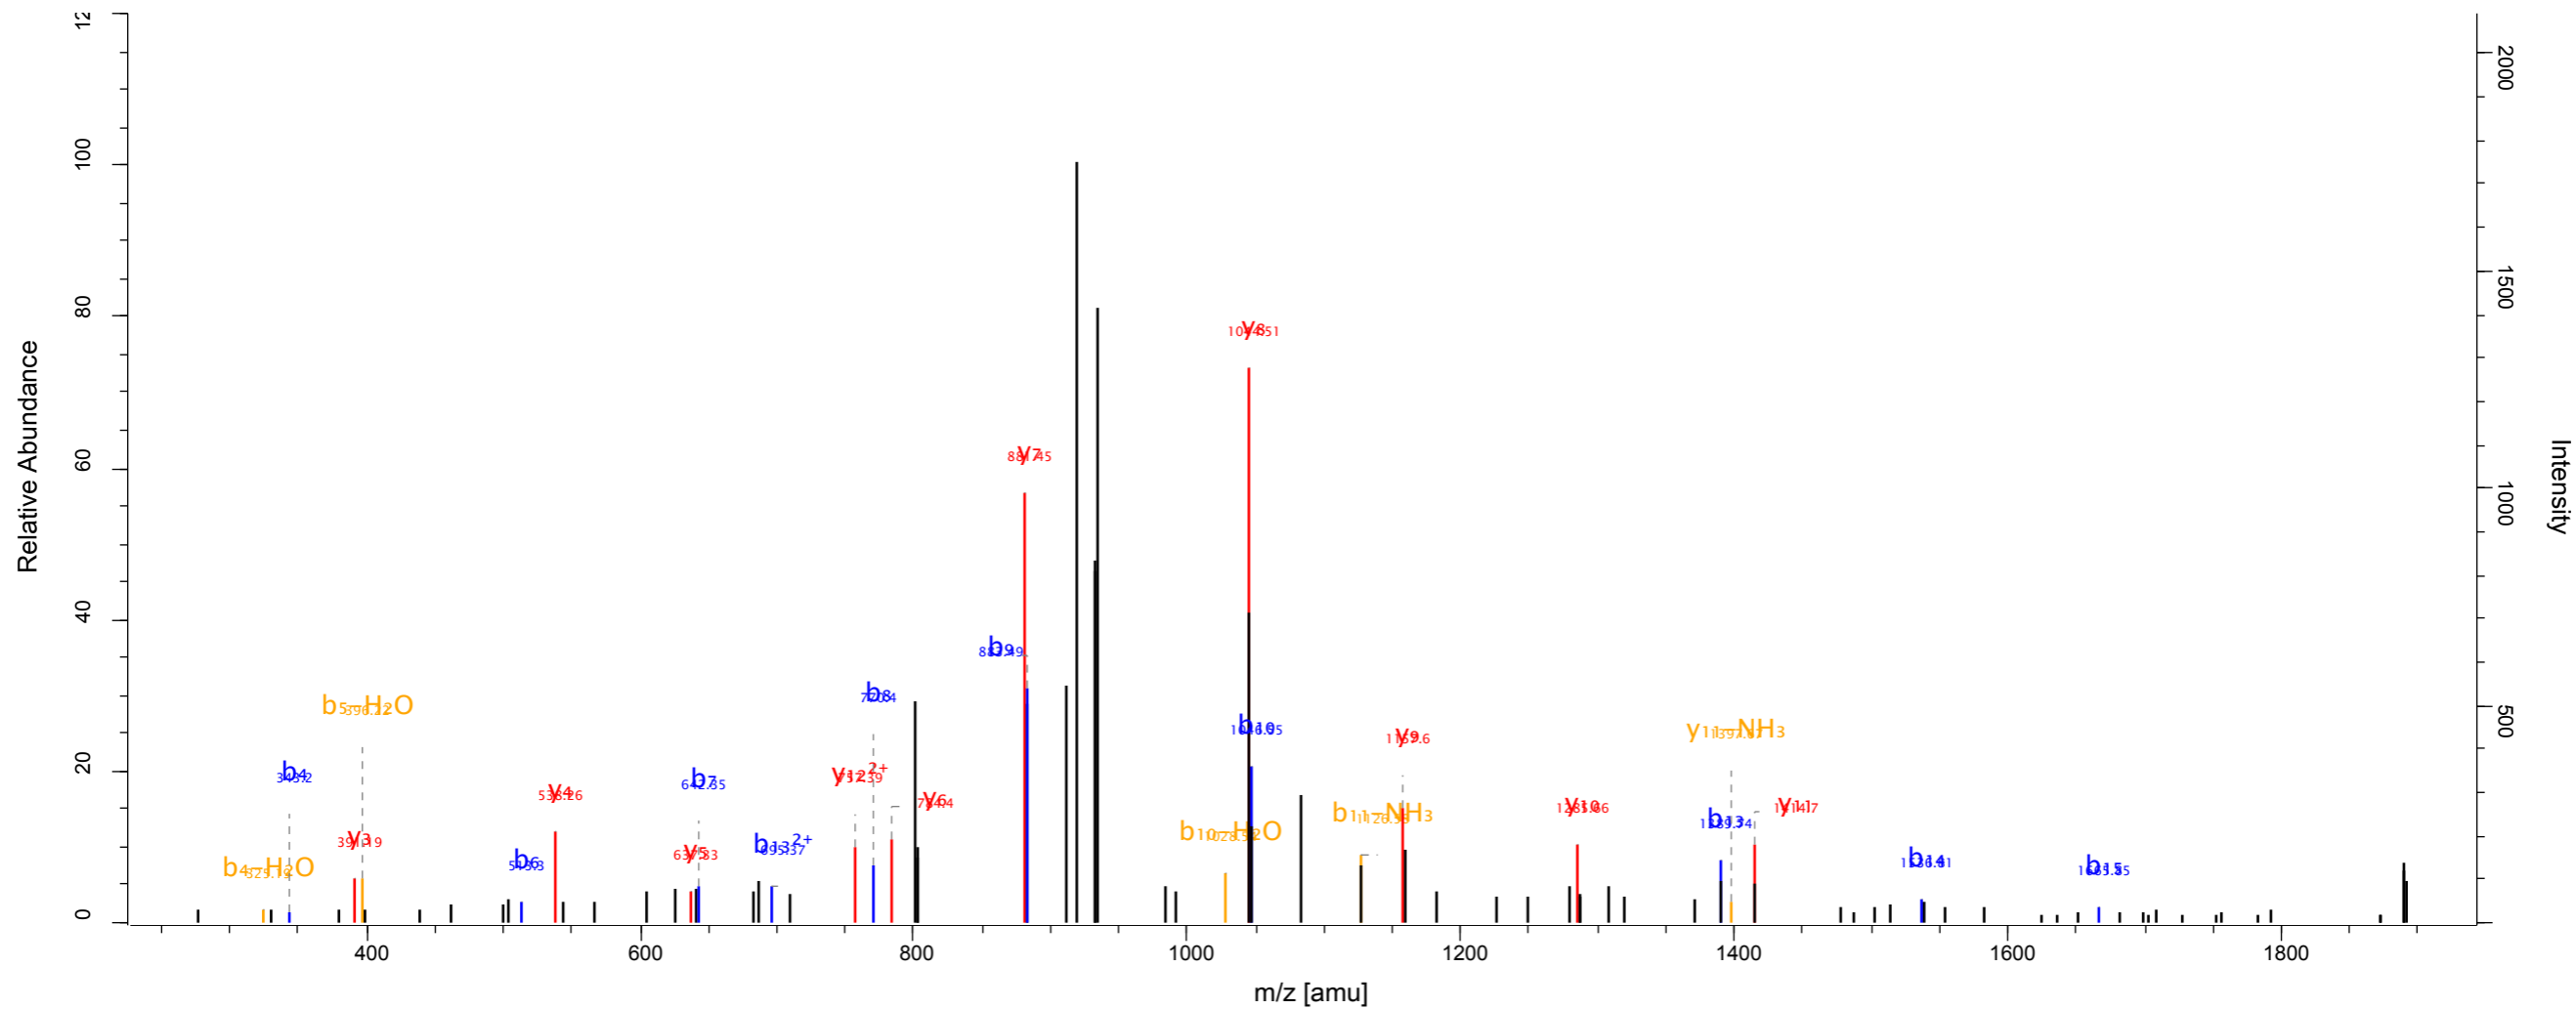

|             |           |          |                                        |
|-------------|-----------|----------|----------------------------------------|
| Scan number | 8153      | Raw file | SKaraca_LMB_TCE_Reverse_281011_18_rep3 |
| Method      | ITMS; CID | Pepti... | 155.84                                 |

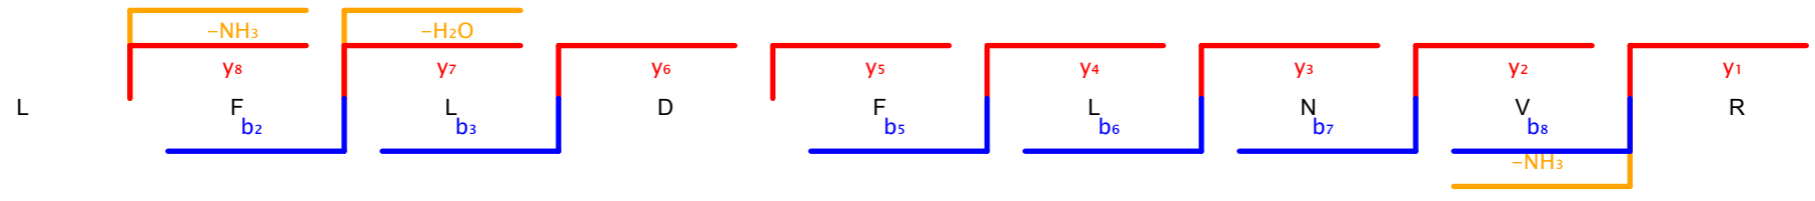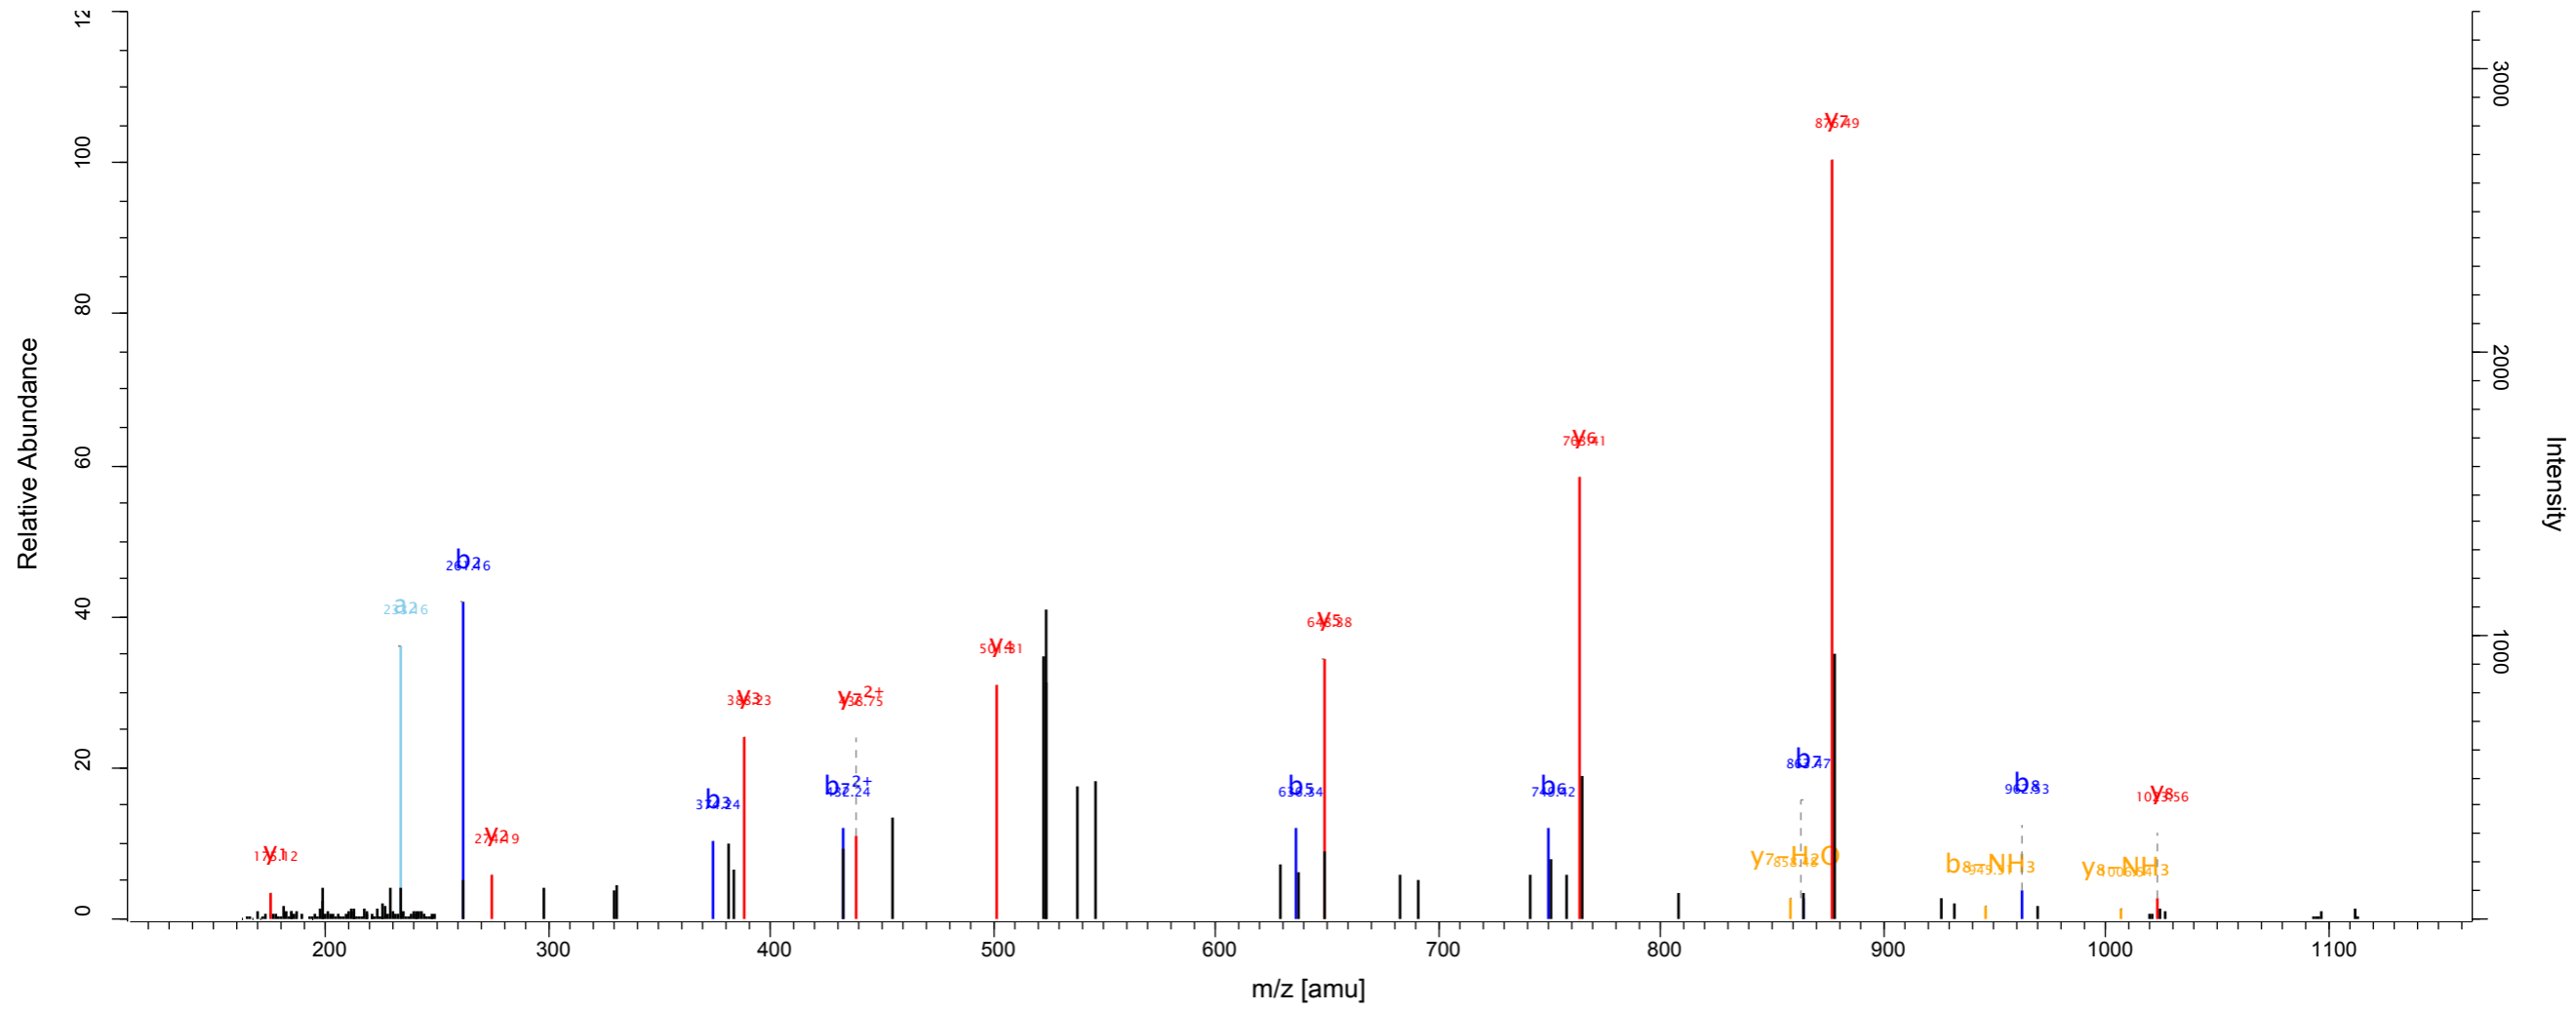

|             |           |          |                                        |
|-------------|-----------|----------|----------------------------------------|
| Scan number | 8988      | Raw file | SKaraca_LMB_TCE_Reverse_281011_18_rep3 |
| Method      | ITMS; CID | Pepti... | 130.1                                  |

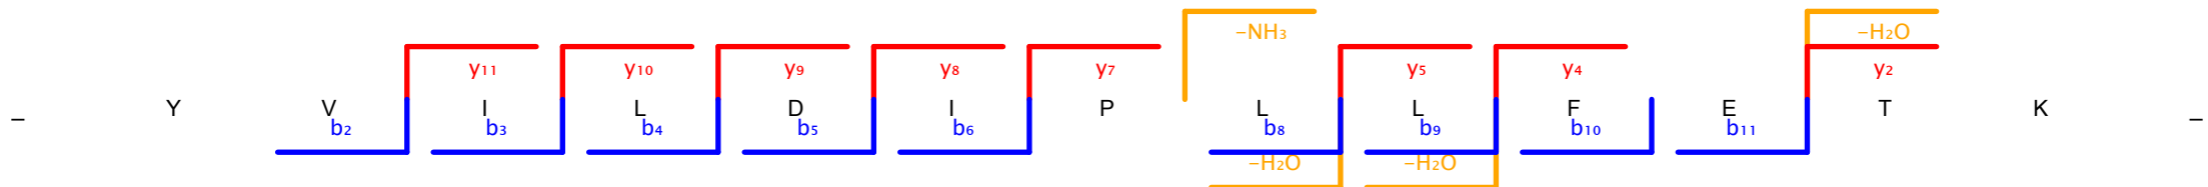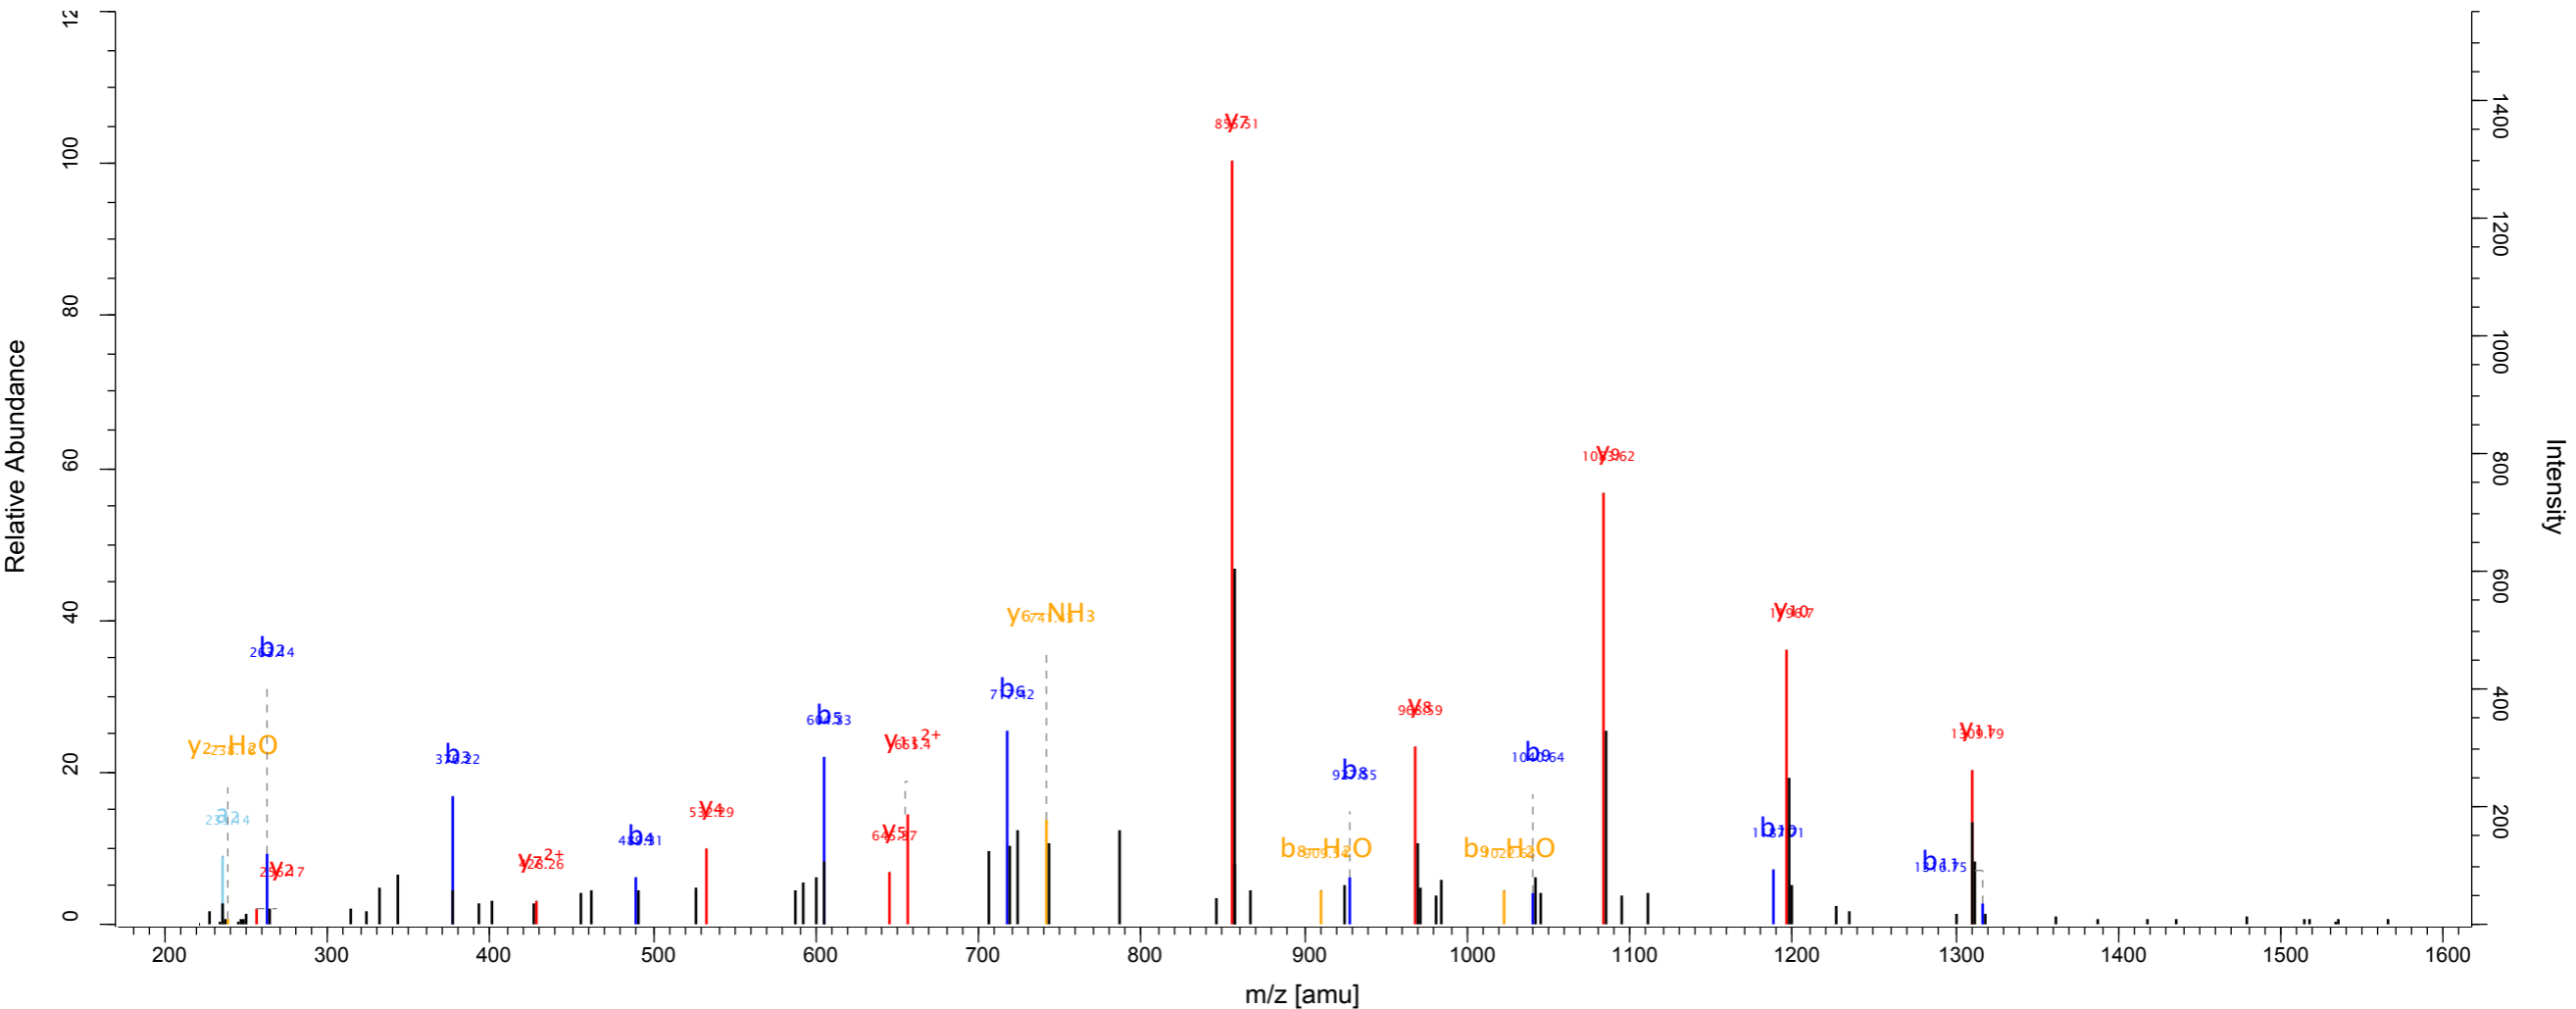

Scan number 7573 Raw file SKaraca\_LMB\_TCE\_Reverse\_281011\_19\_rep1  
 Method ITMS; CID Pepti... 124.1

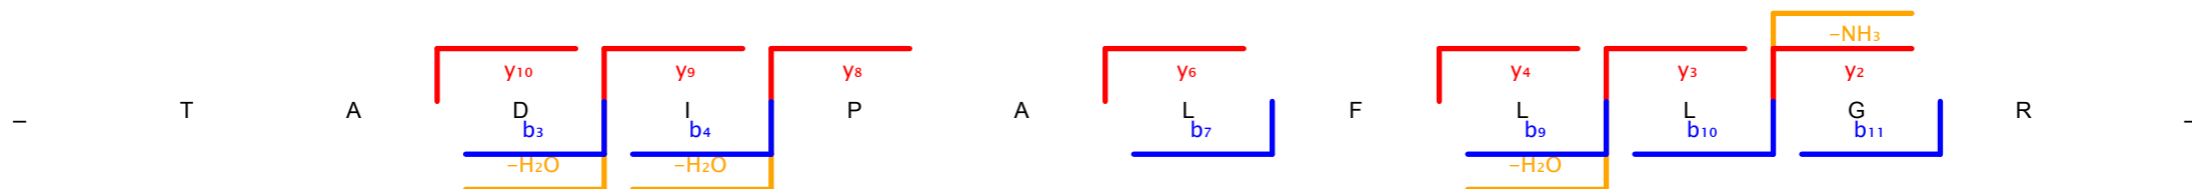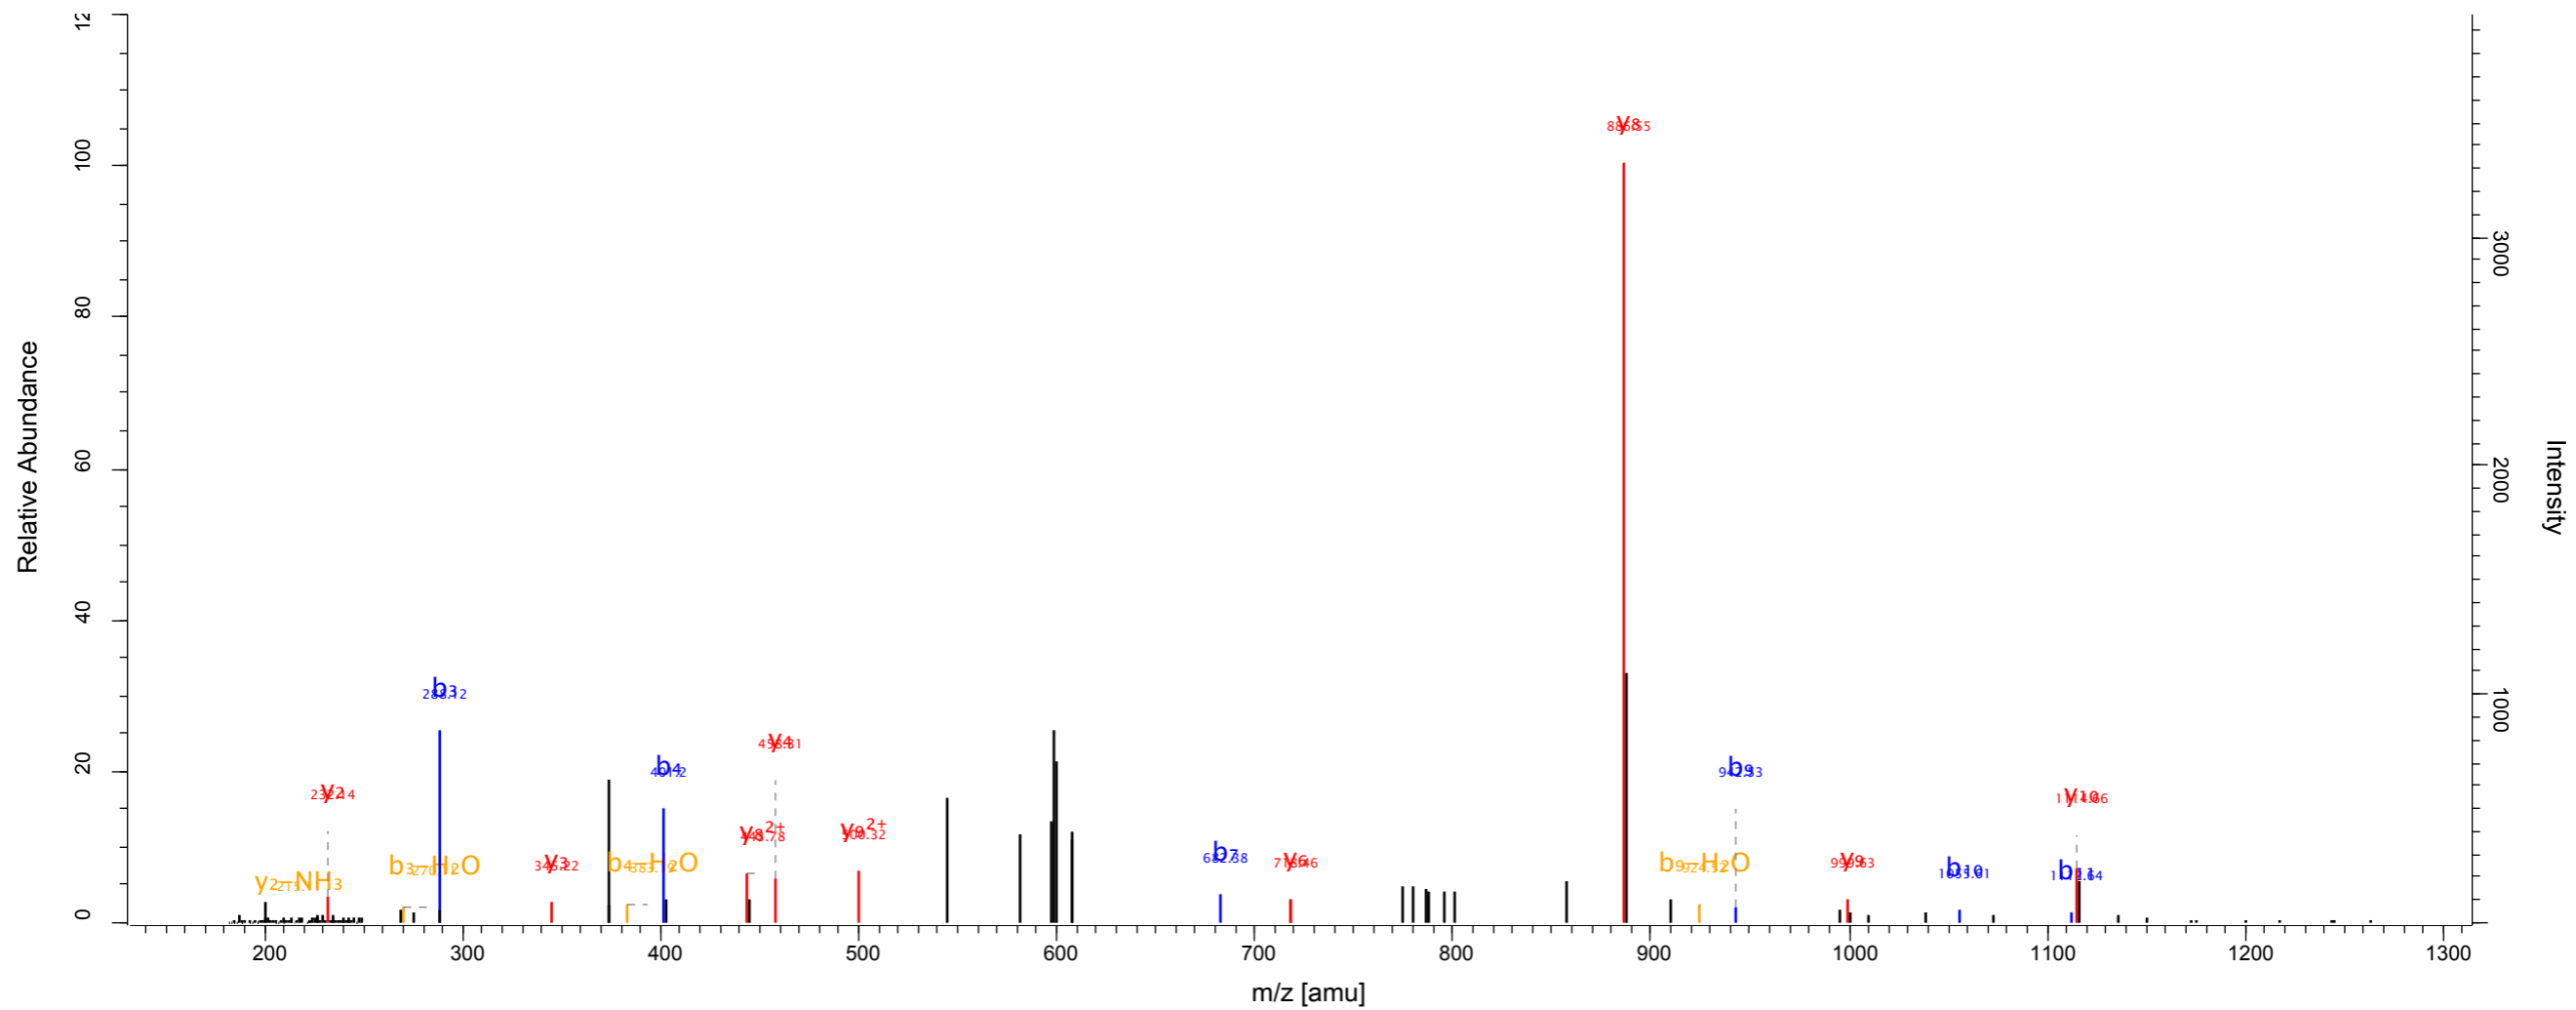

Scan number 6975 Raw file SKaraca\_LMB\_TCE\_Reverse\_281011\_19\_rep2  
 Method ITMS; CID Pepti... 143.97

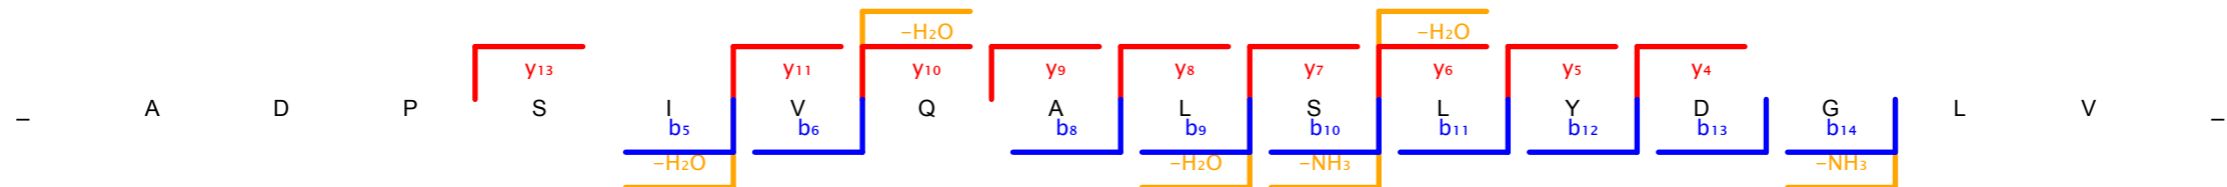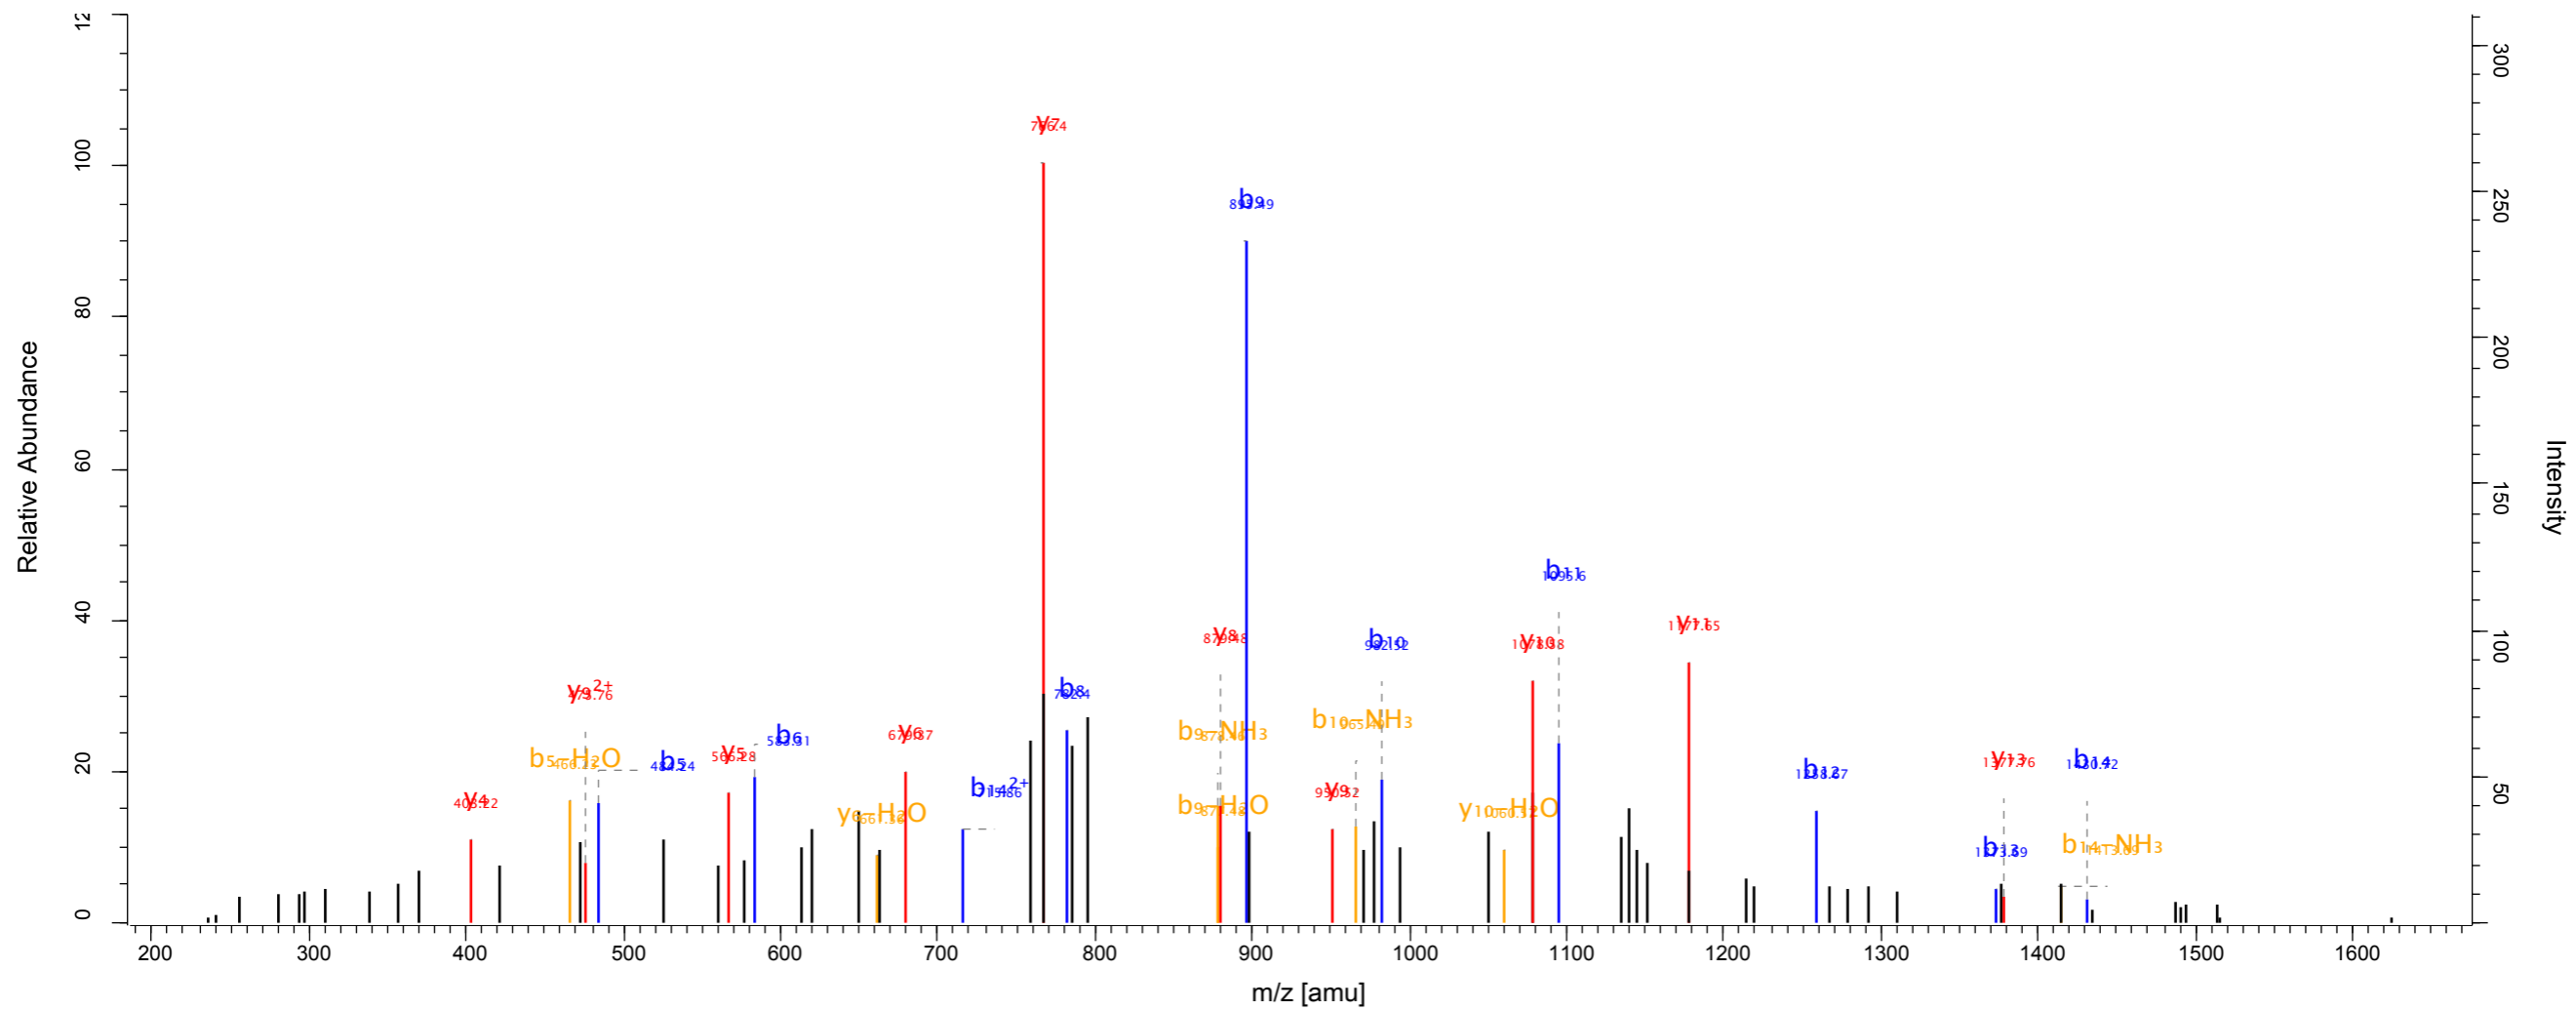

Scan number 5528 Raw file SKaraca\_LMB\_TCE\_Reverse\_281011\_19\_rep3  
 Method ITMS; CID Pepti... 155.56

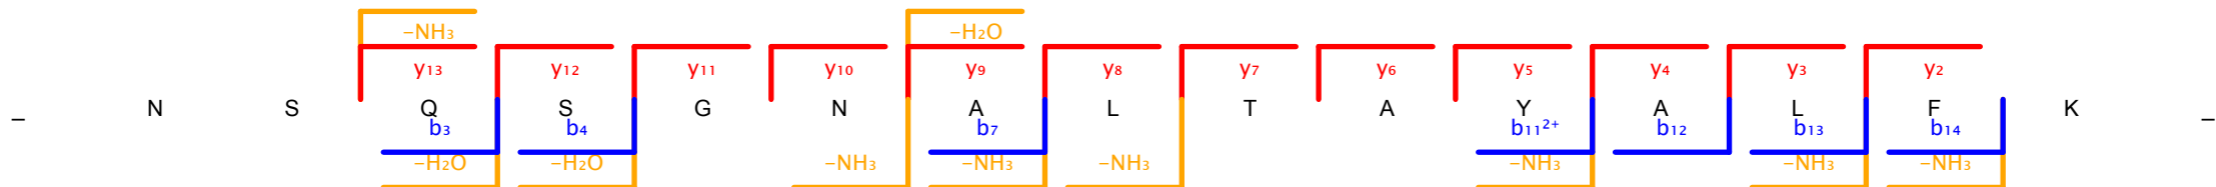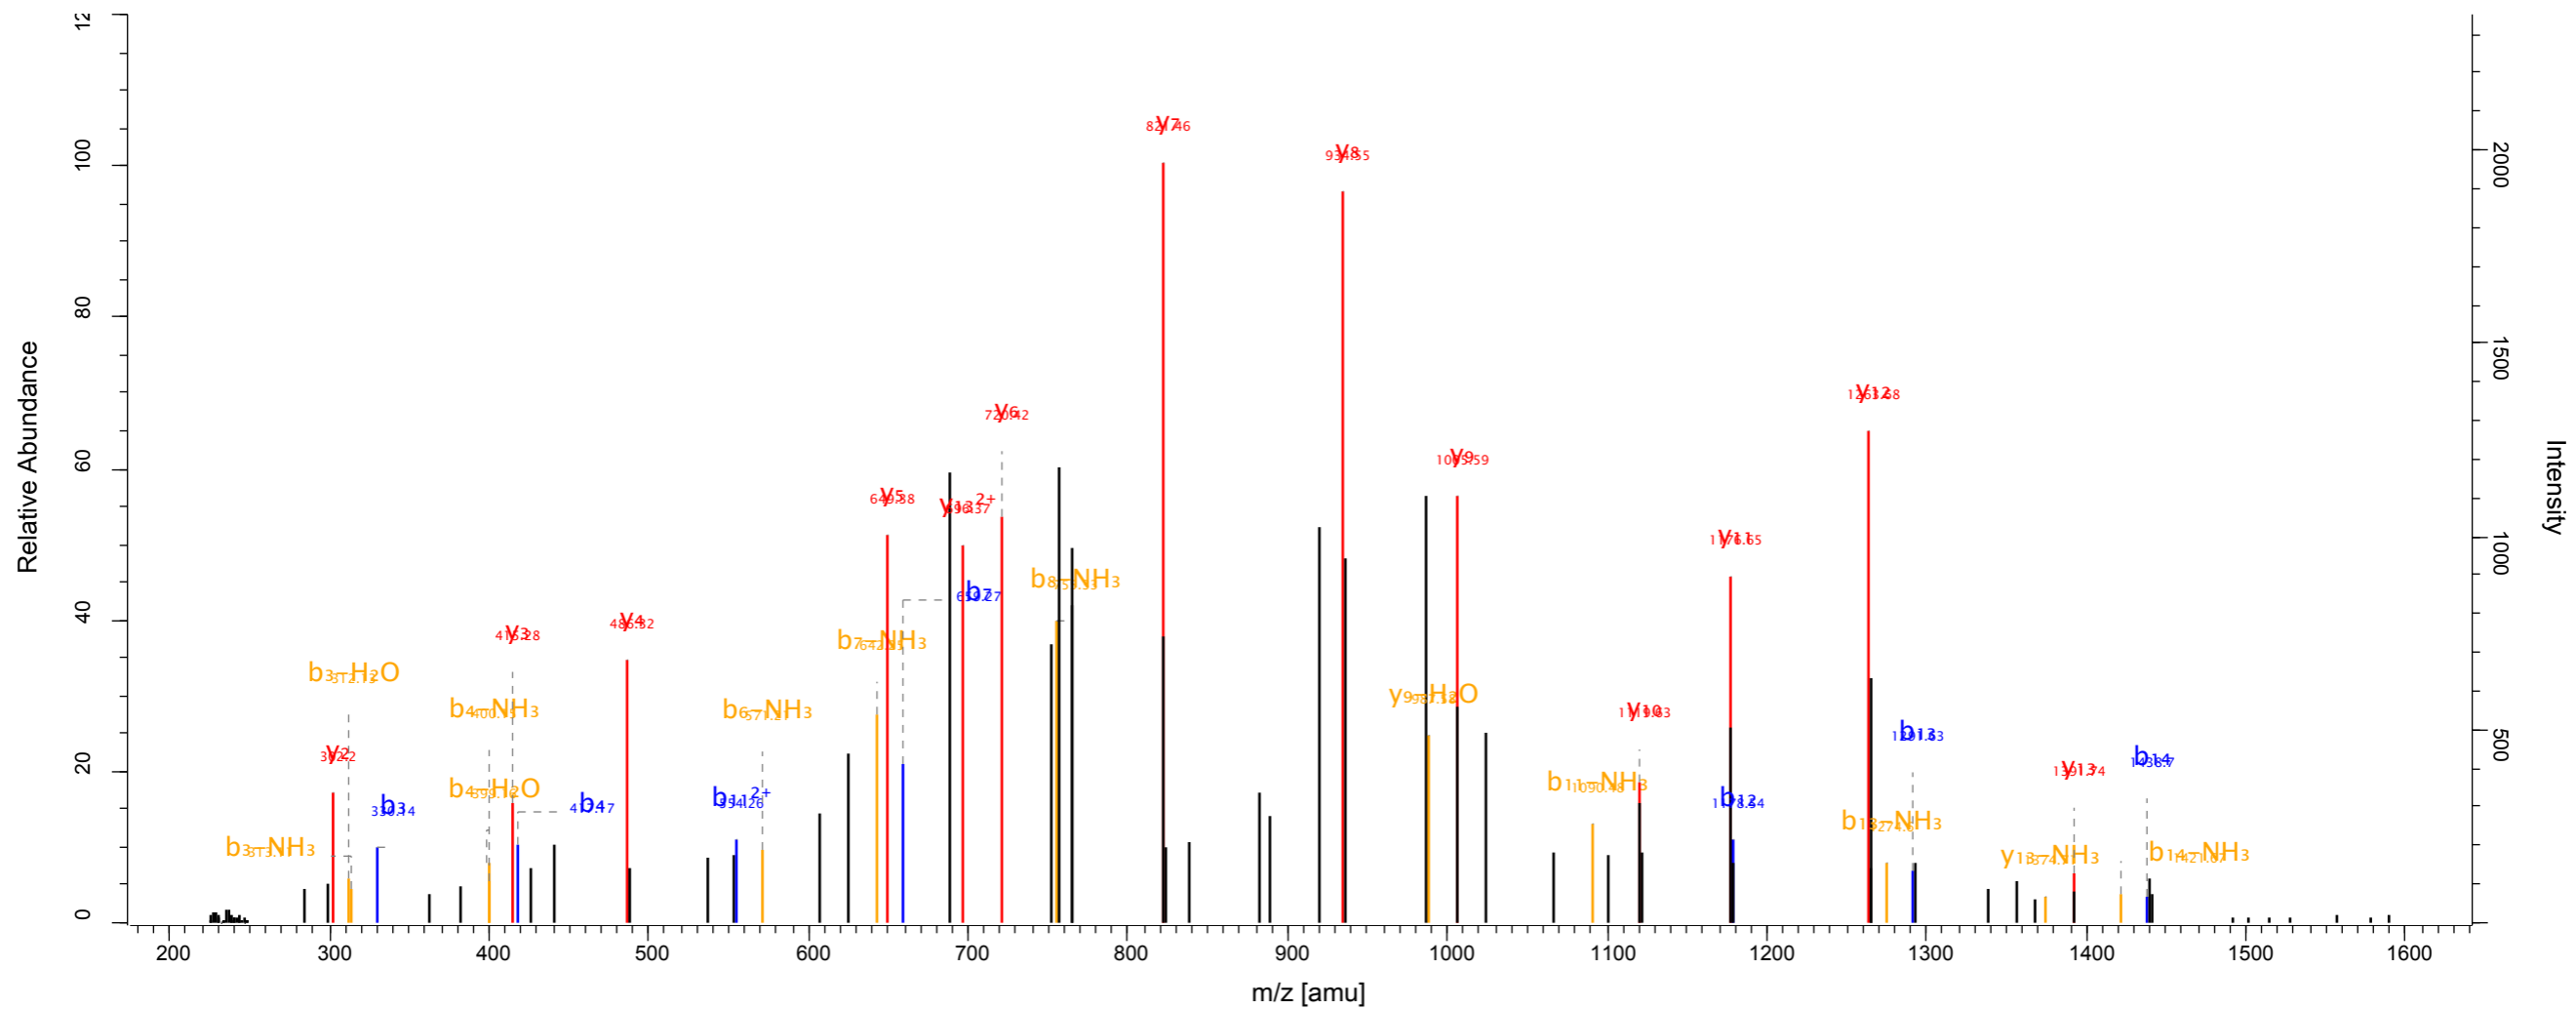

|             |           |          |                                        |
|-------------|-----------|----------|----------------------------------------|
| Scan number | 6099      | Raw file | SKaraca_LMB_TCE_Reverse_281011_19_rep3 |
| Method      | ITMS; CID | Pepti... | 137.12                                 |

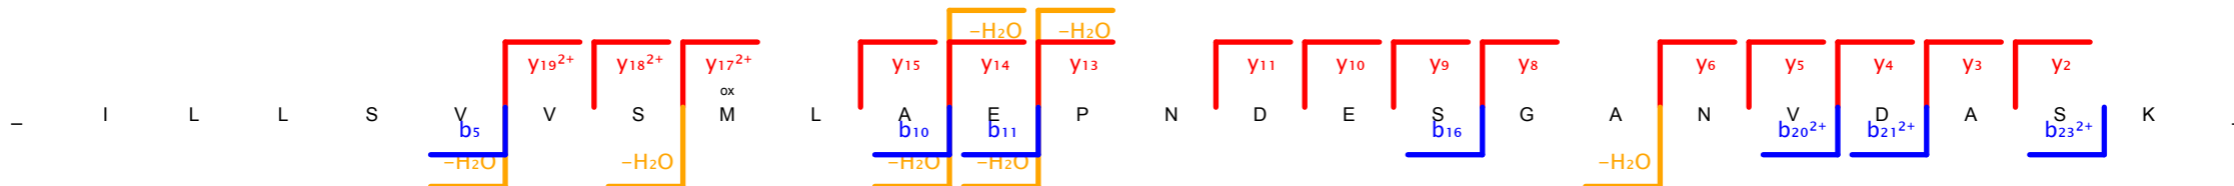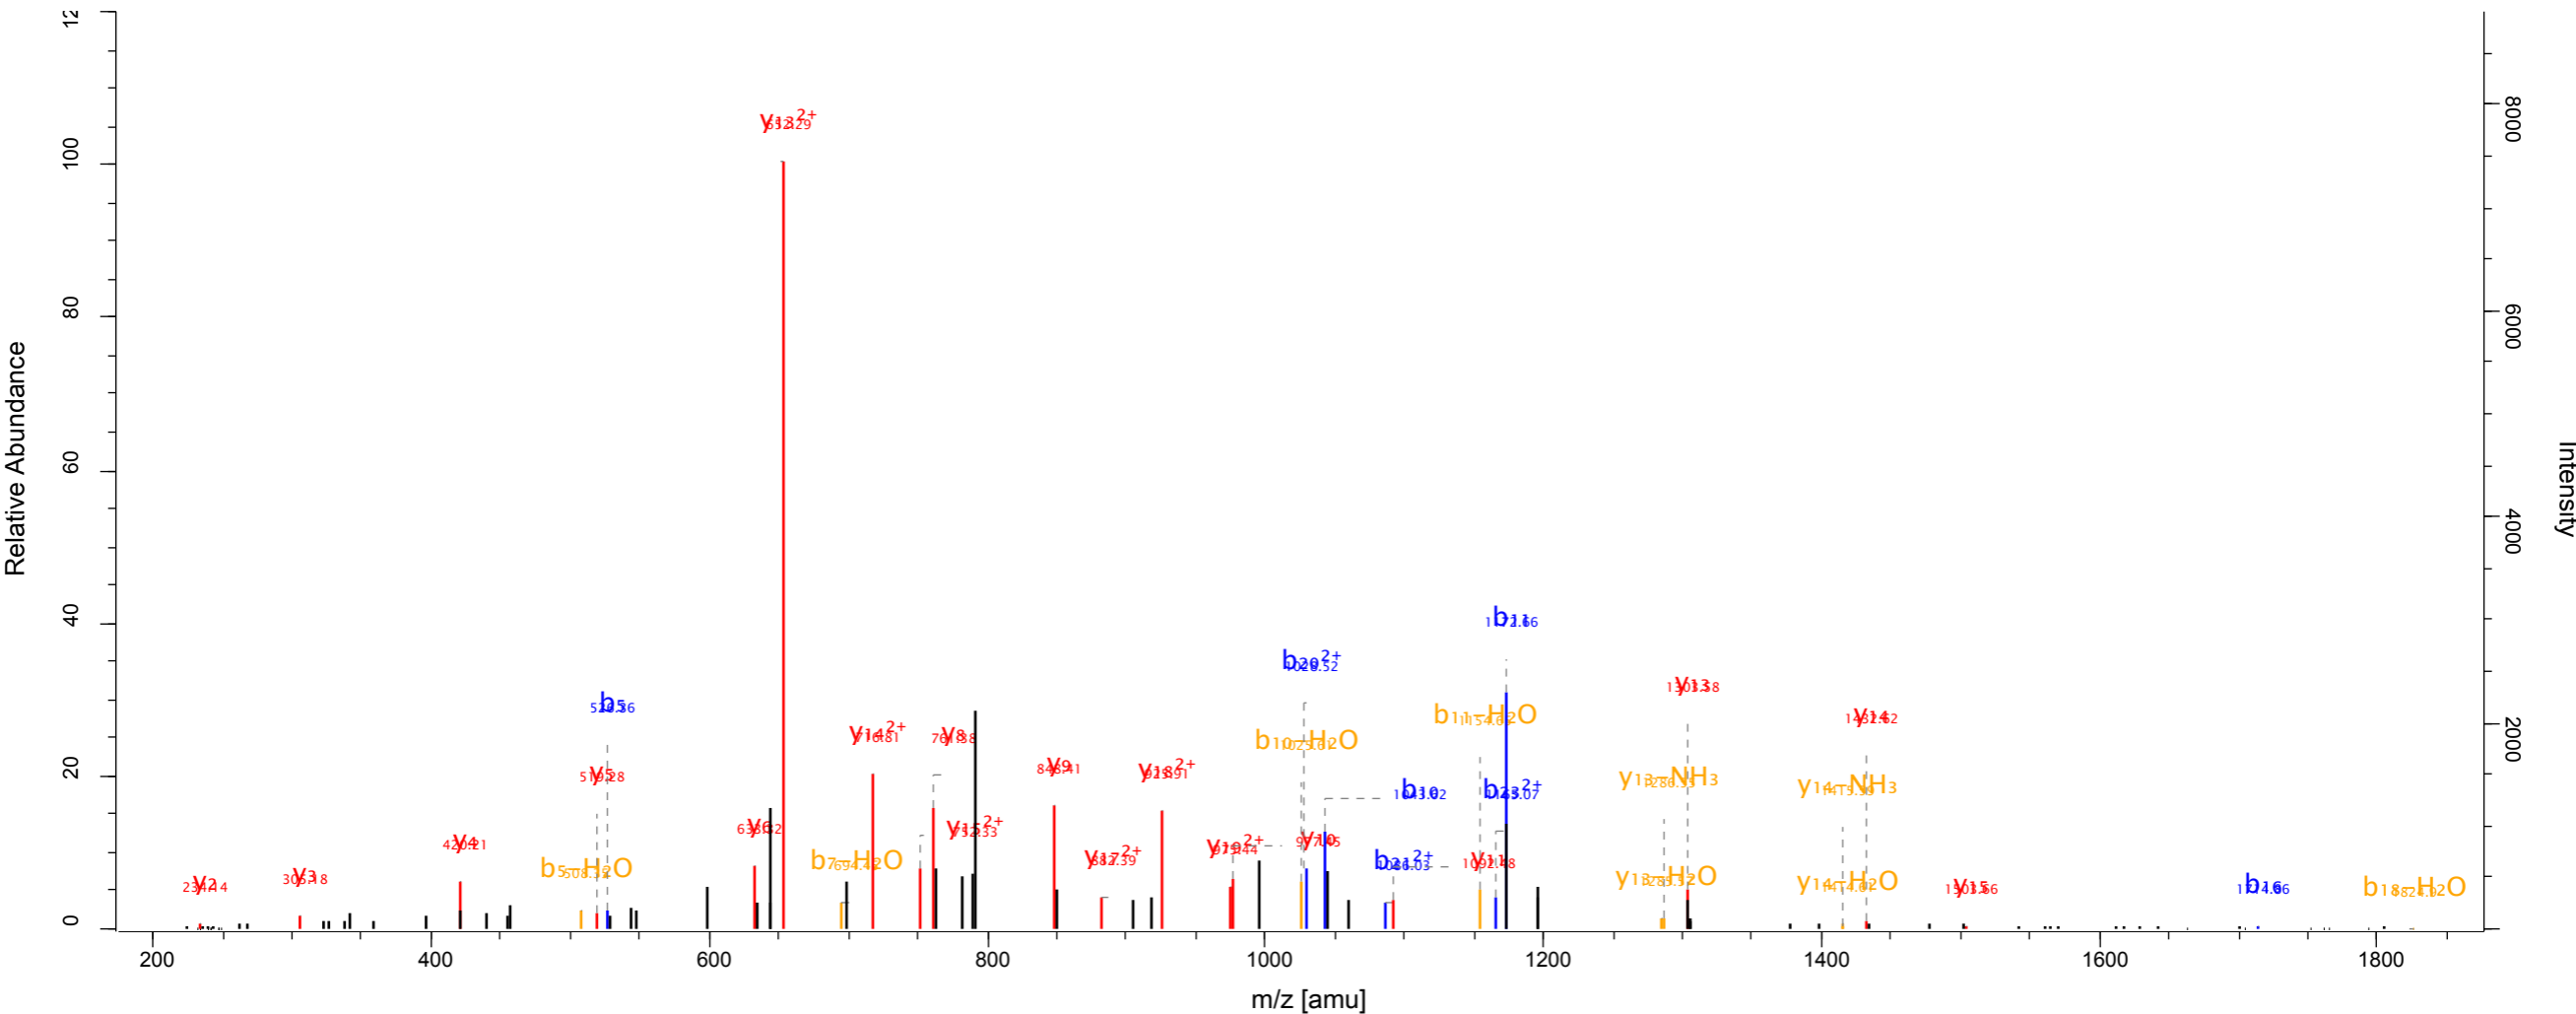

Scan number 7120 Raw file SKaraca\_LMB\_TCE\_Reverse\_281011\_19\_rep3  
 Method ITMS; CID Pepti... 164.97

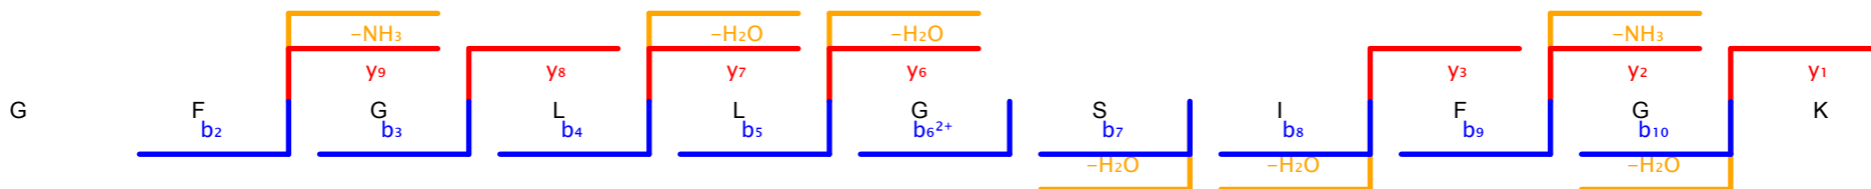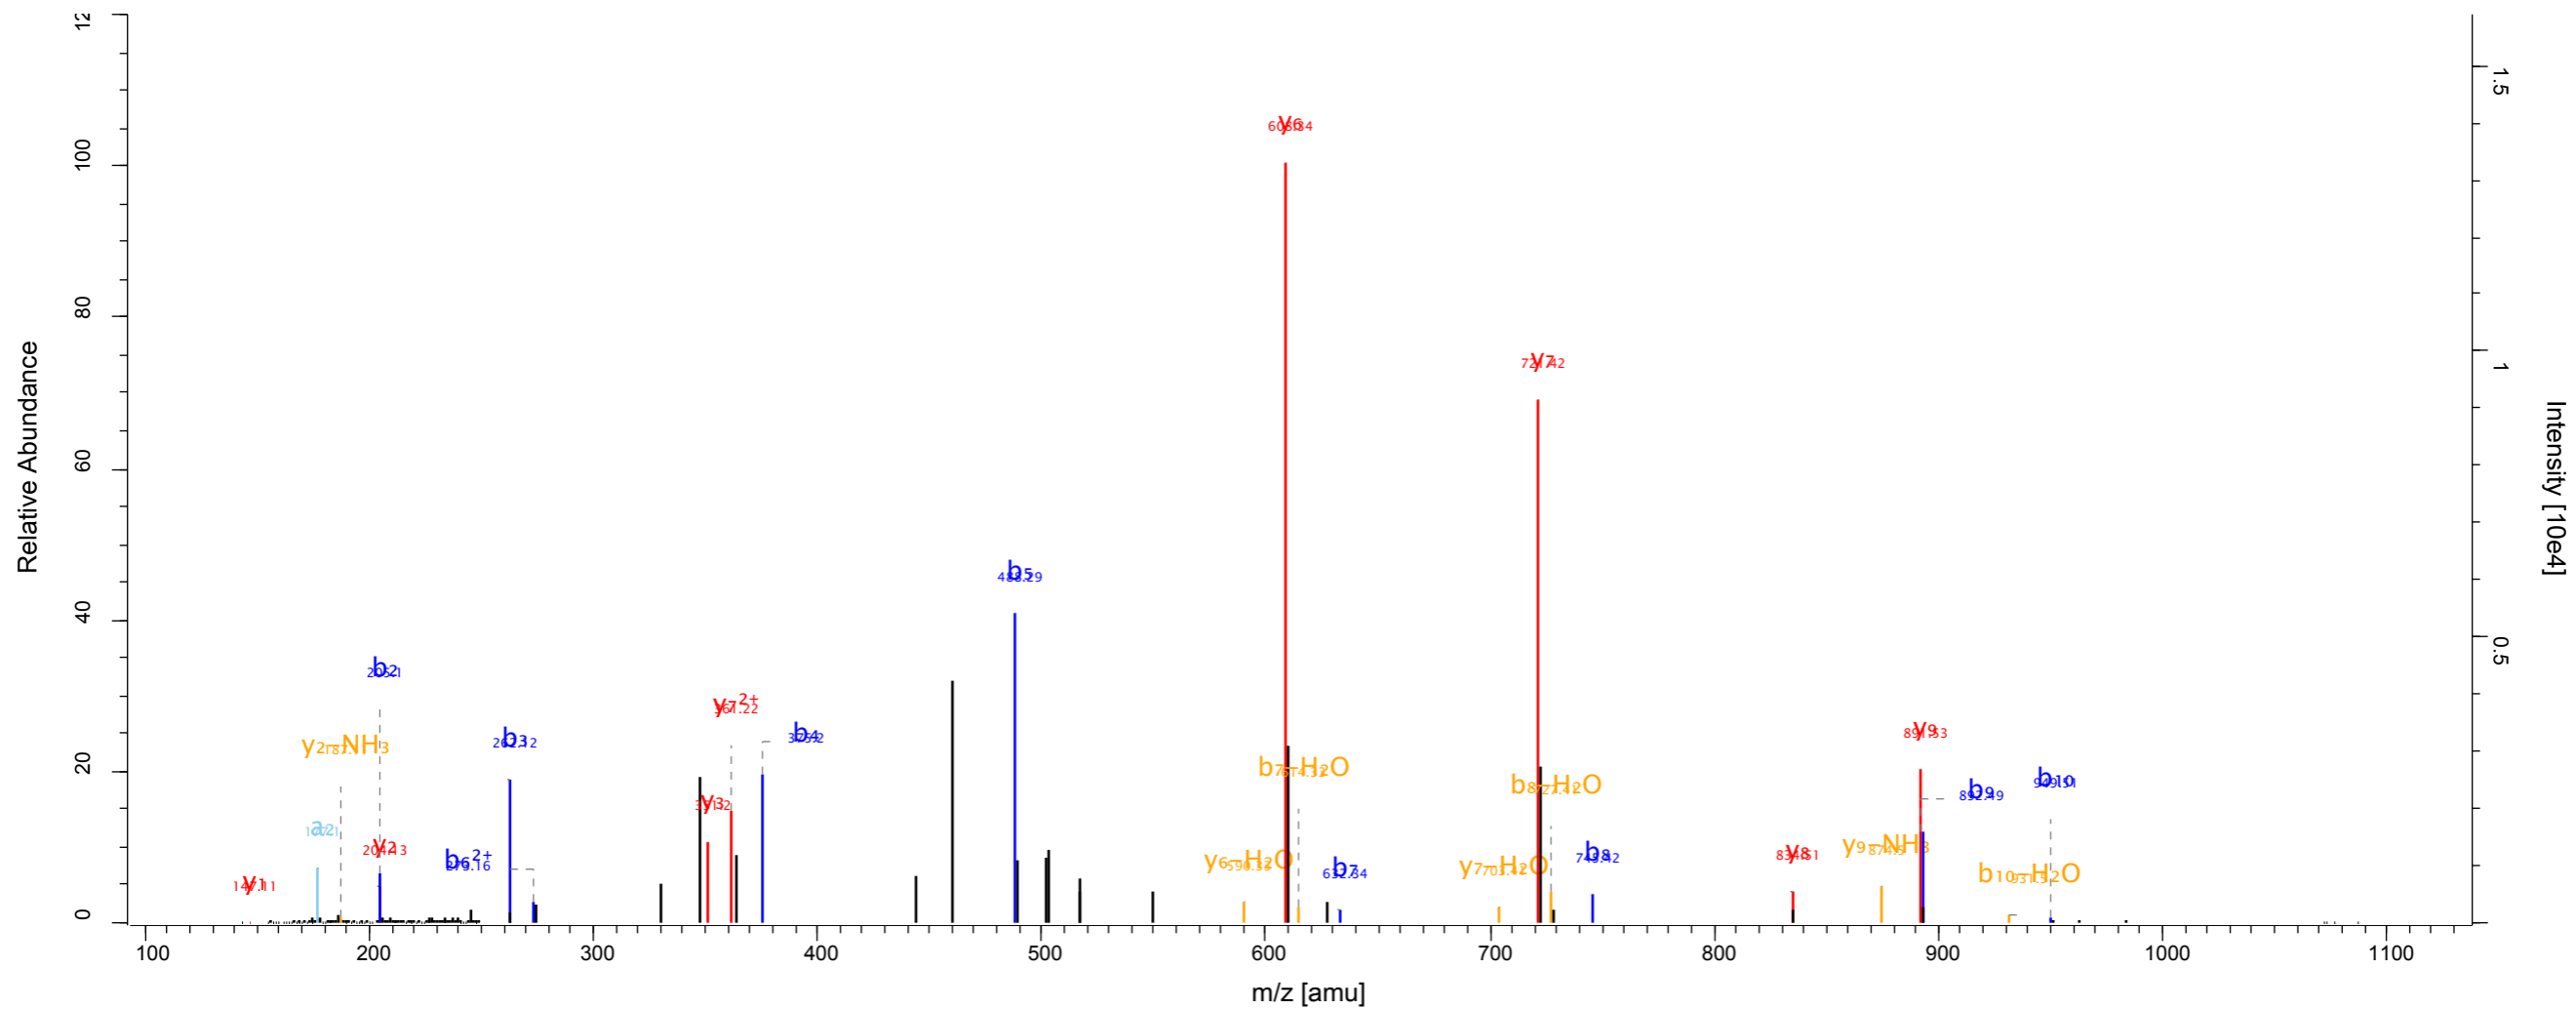



Scan number 4441 Raw file SKaraca\_LMB\_TCE\_Reverse\_281011\_20\_rep1  
 Method ITMS; CID Pepti... 137.46

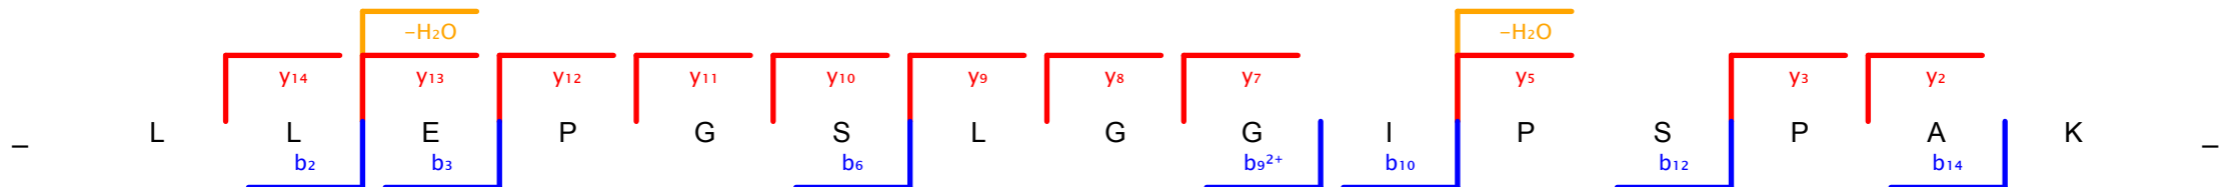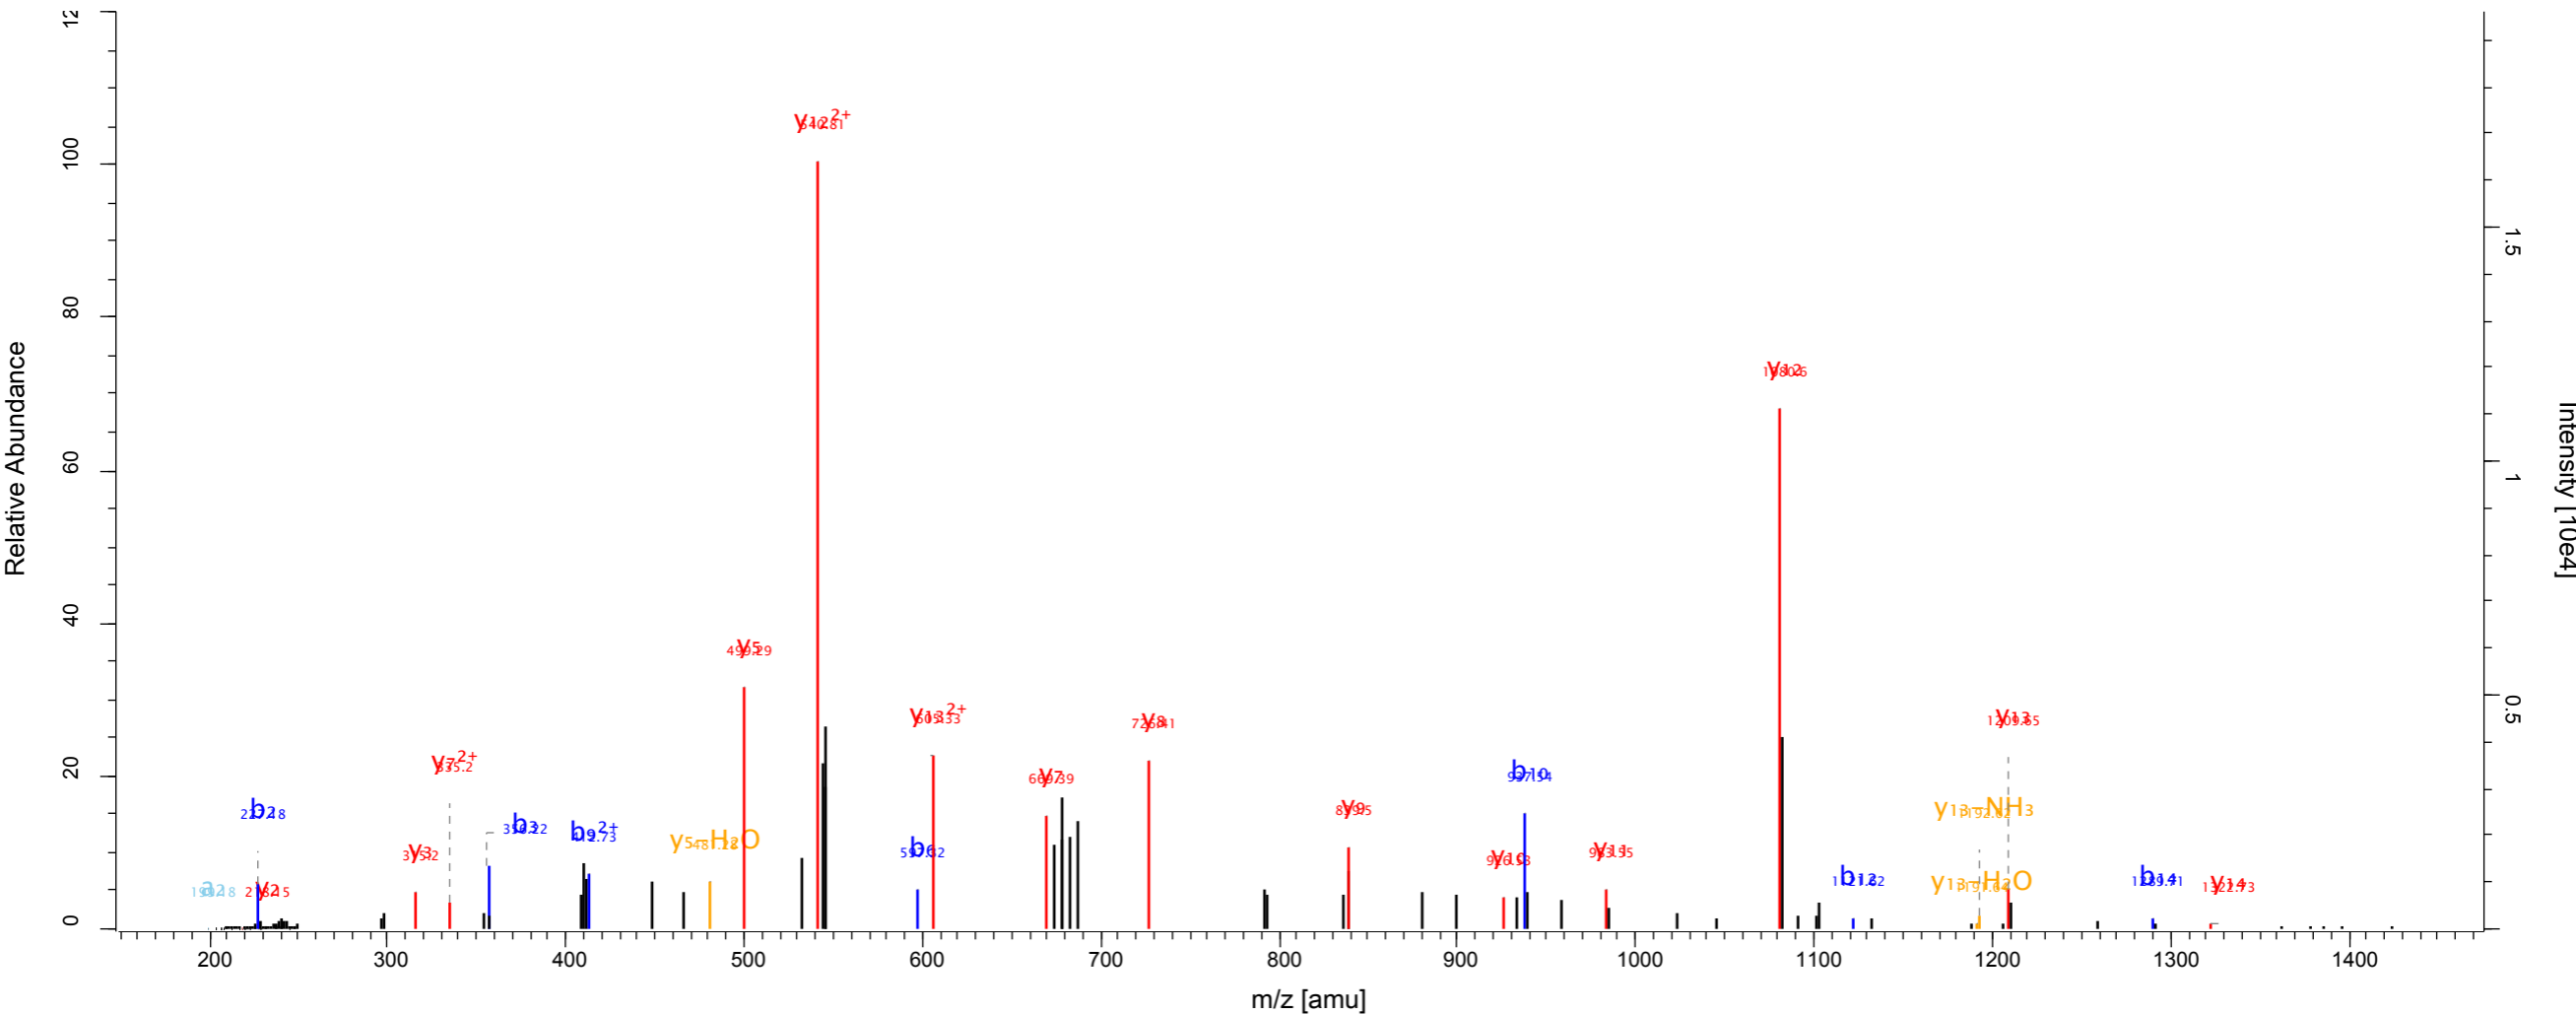

Scan number 7354 Raw file SKaraca\_LMB\_TCE\_Reverse\_281011\_20\_rep3  
 Method ITMS; CID Pepti... 104.95

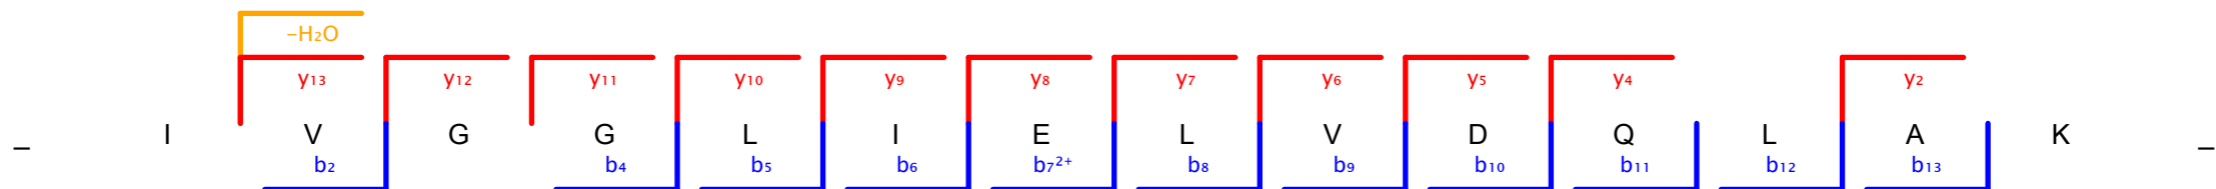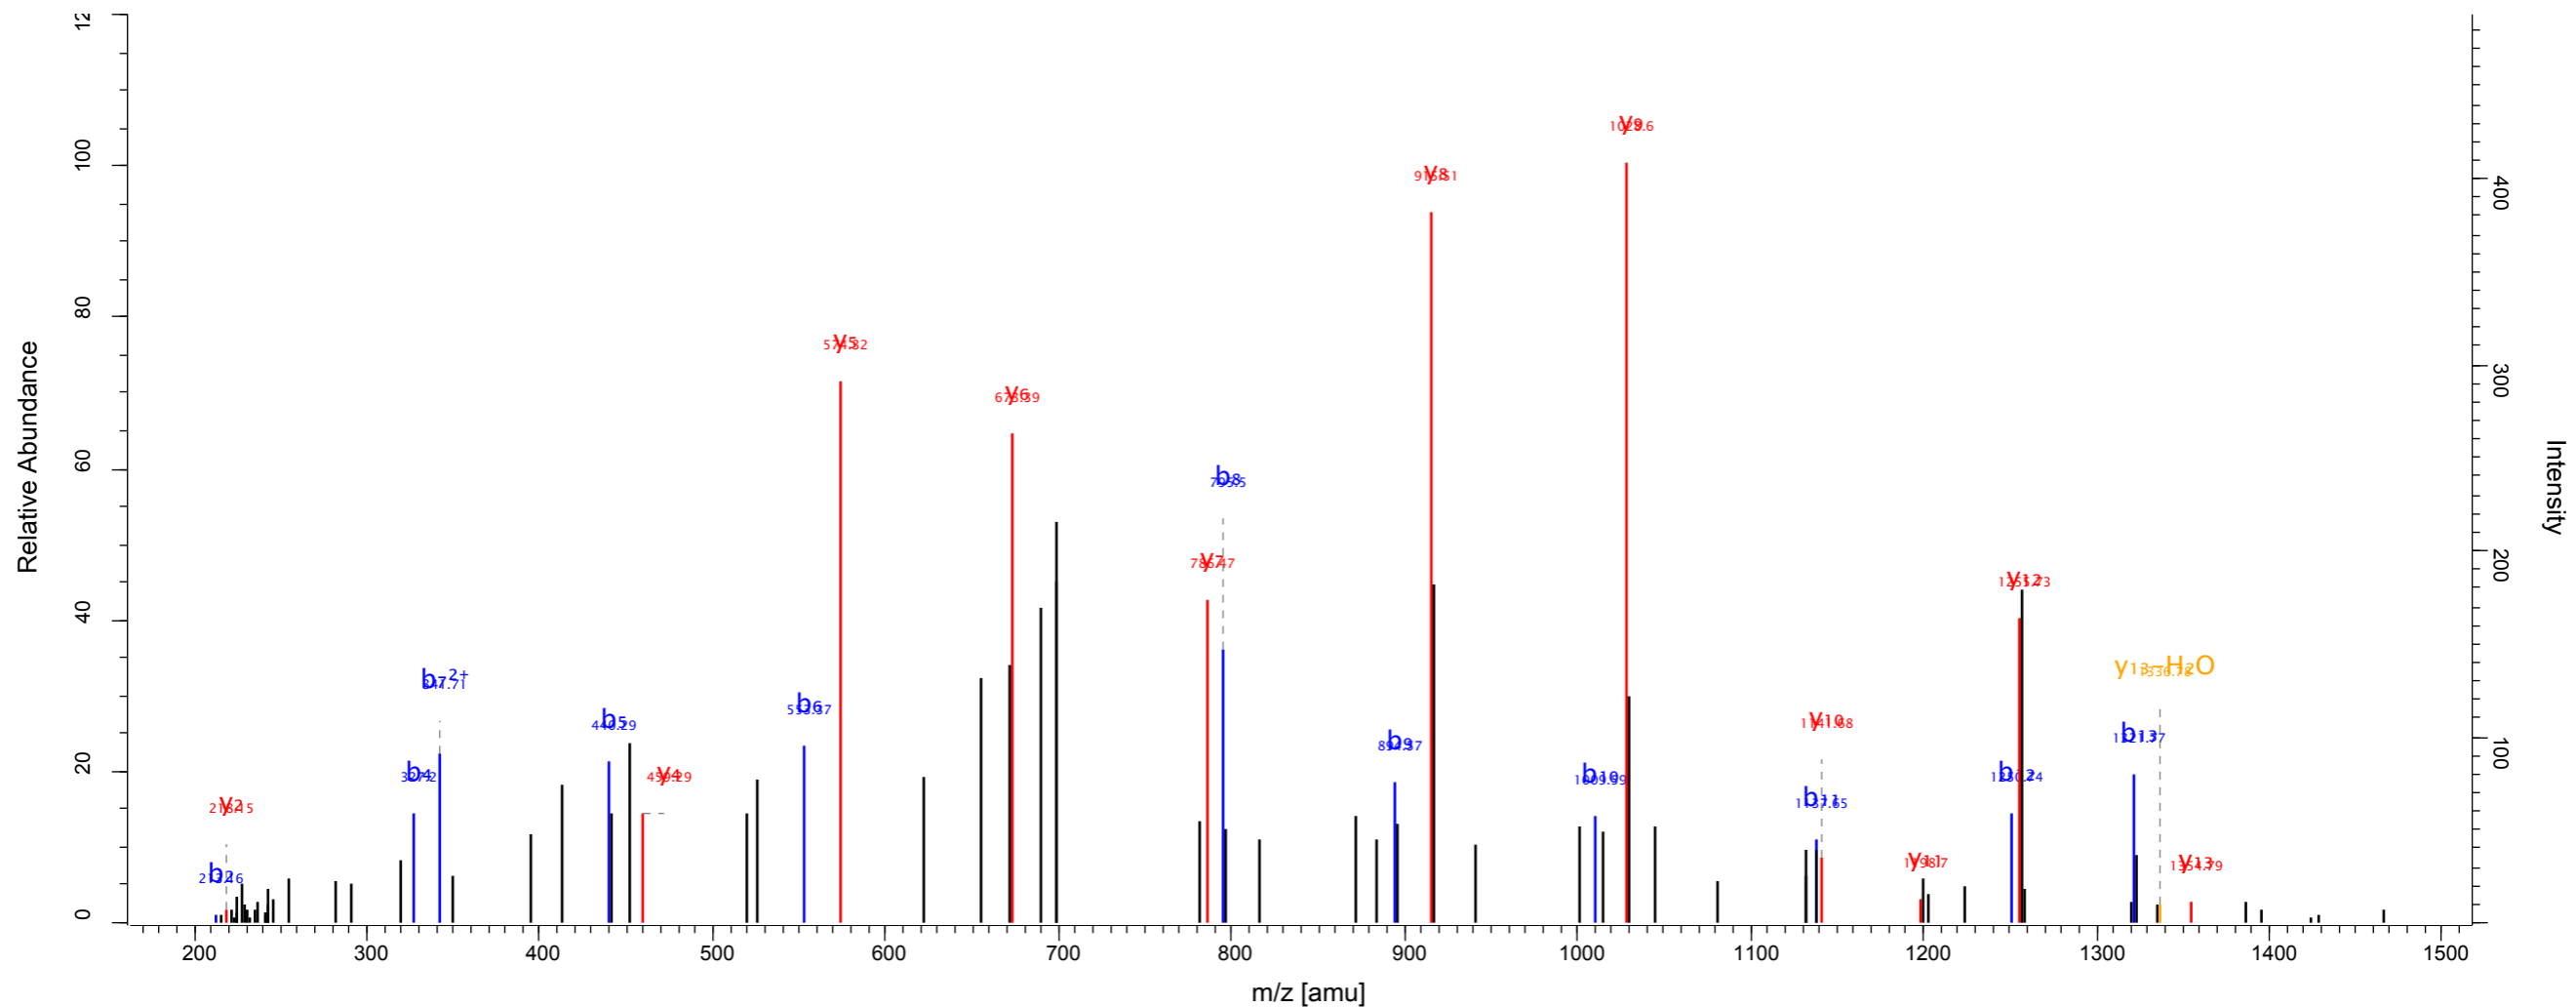

Scan number 3370 Raw file SKaraca\_LMB\_TCE\_Reverse\_281011\_21\_rep1  
 Method ITMS; CID Pepti... 136.26

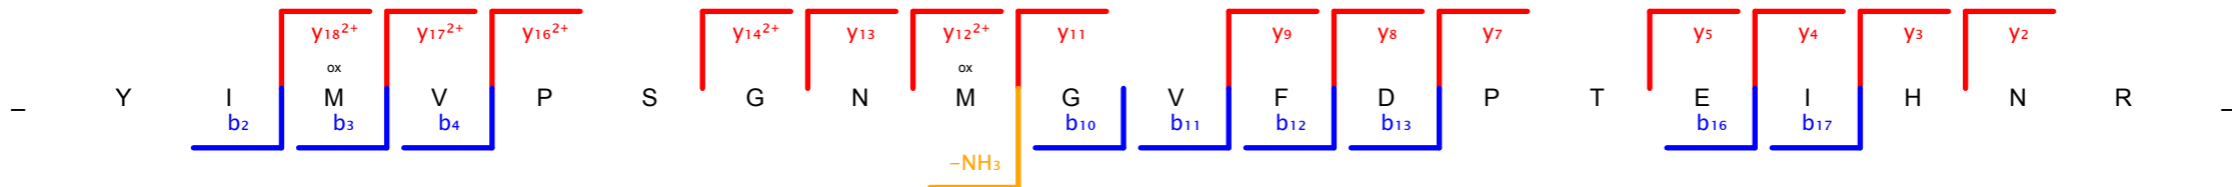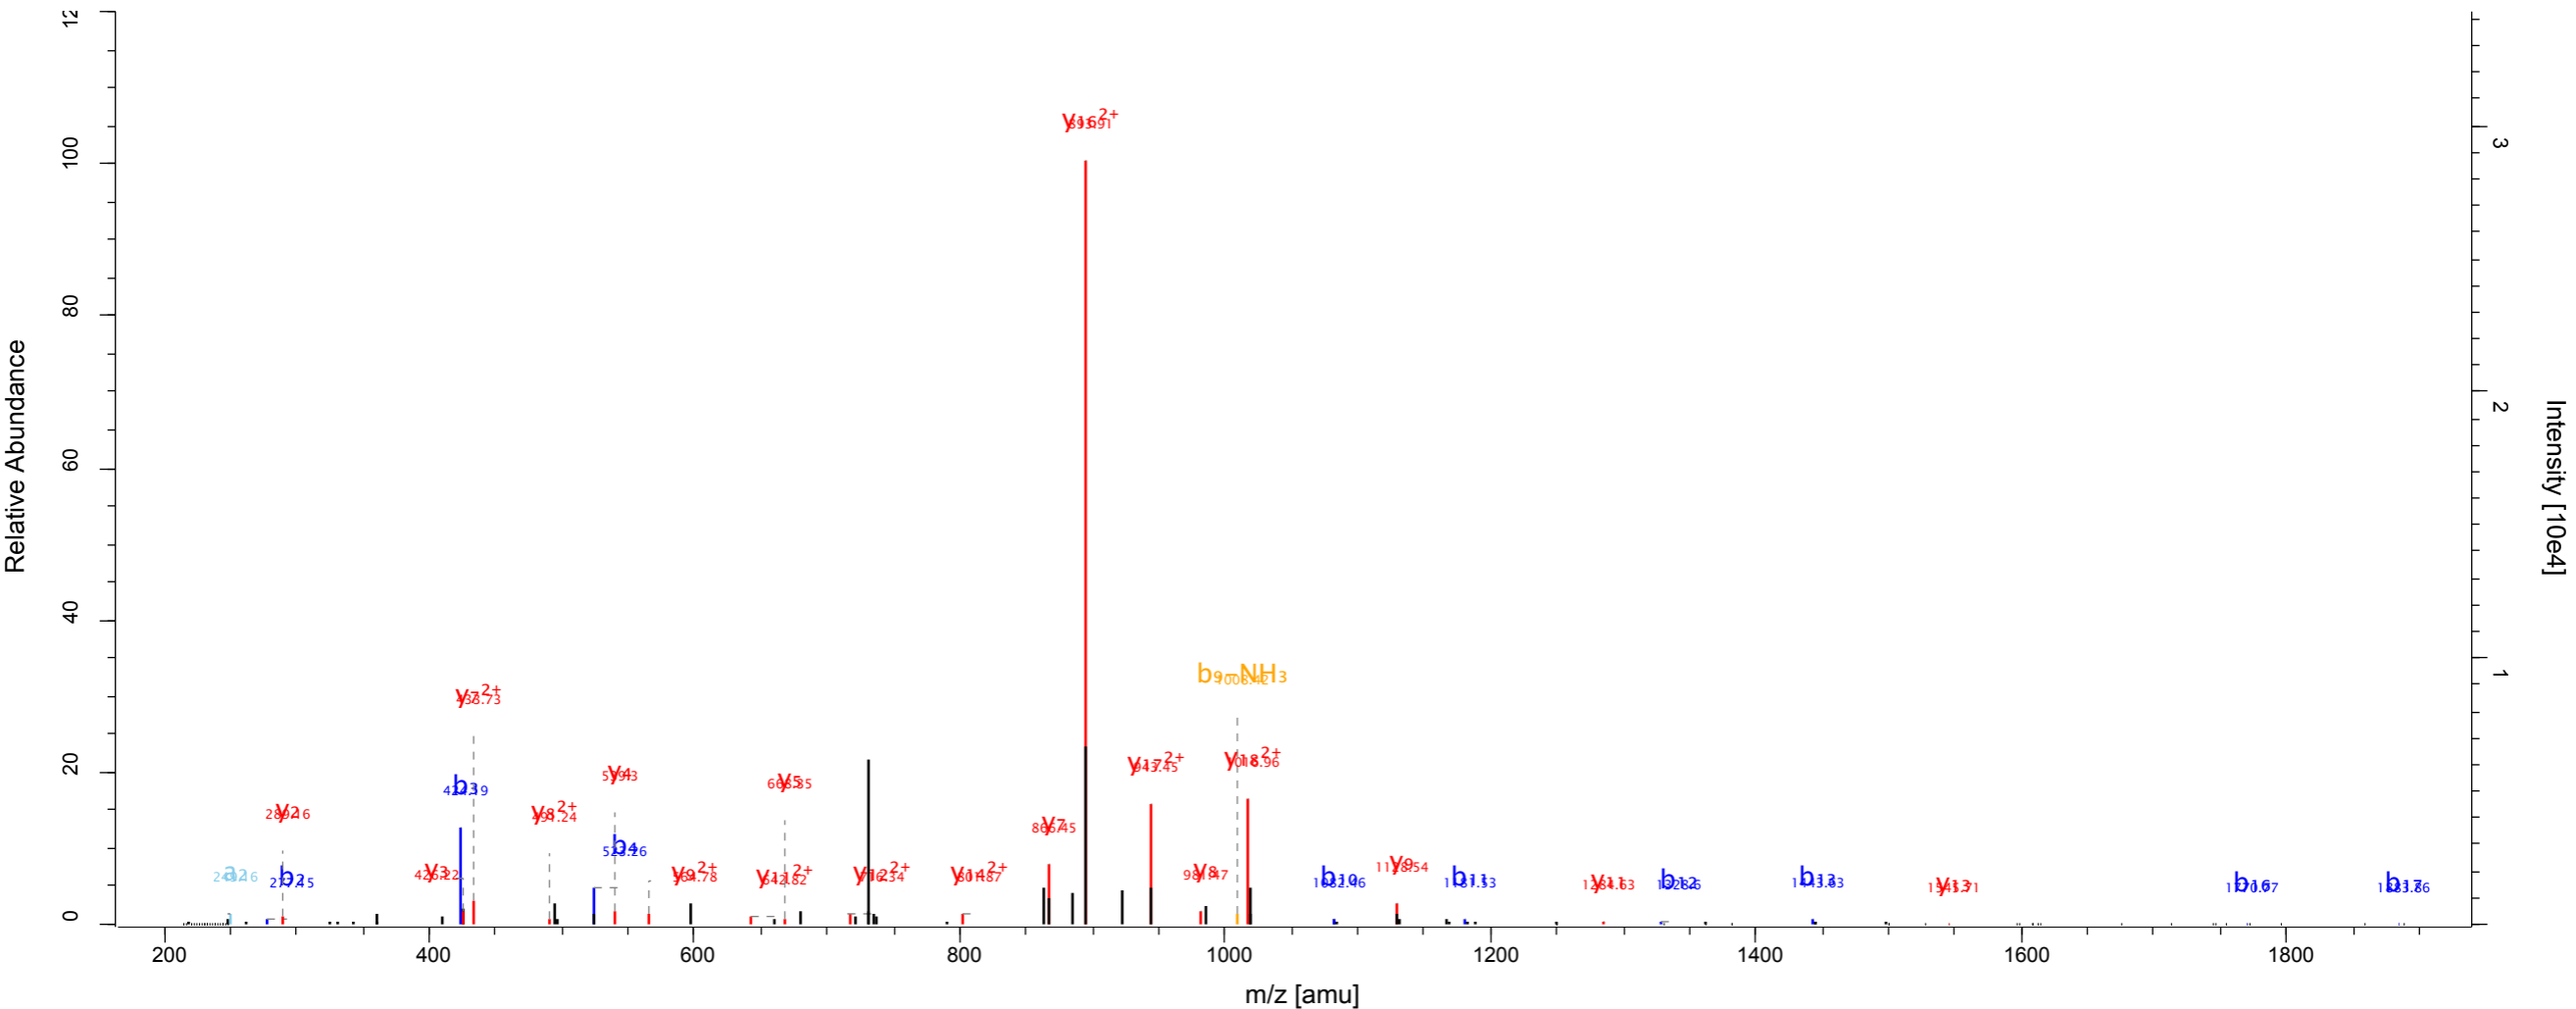

Scan number 4538 Raw file SKaraca\_LMB\_TCE\_Reverse\_281011\_21\_rep1  
 Method ITMS; CID Pepti... 96.25

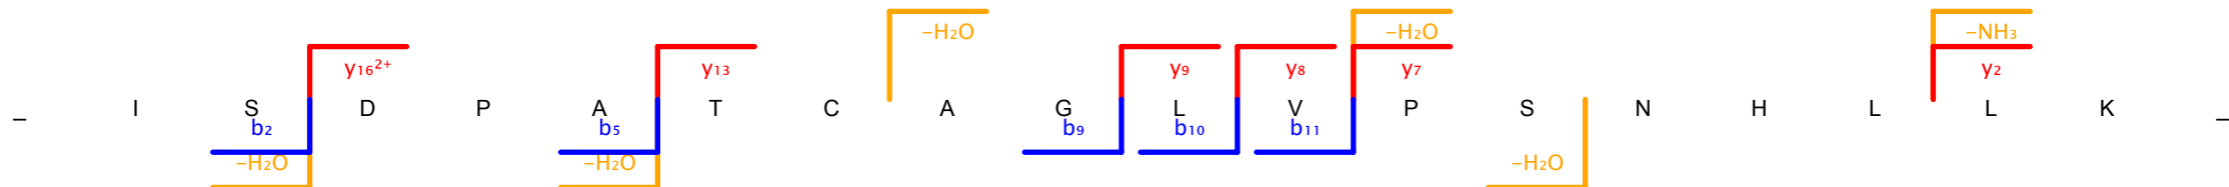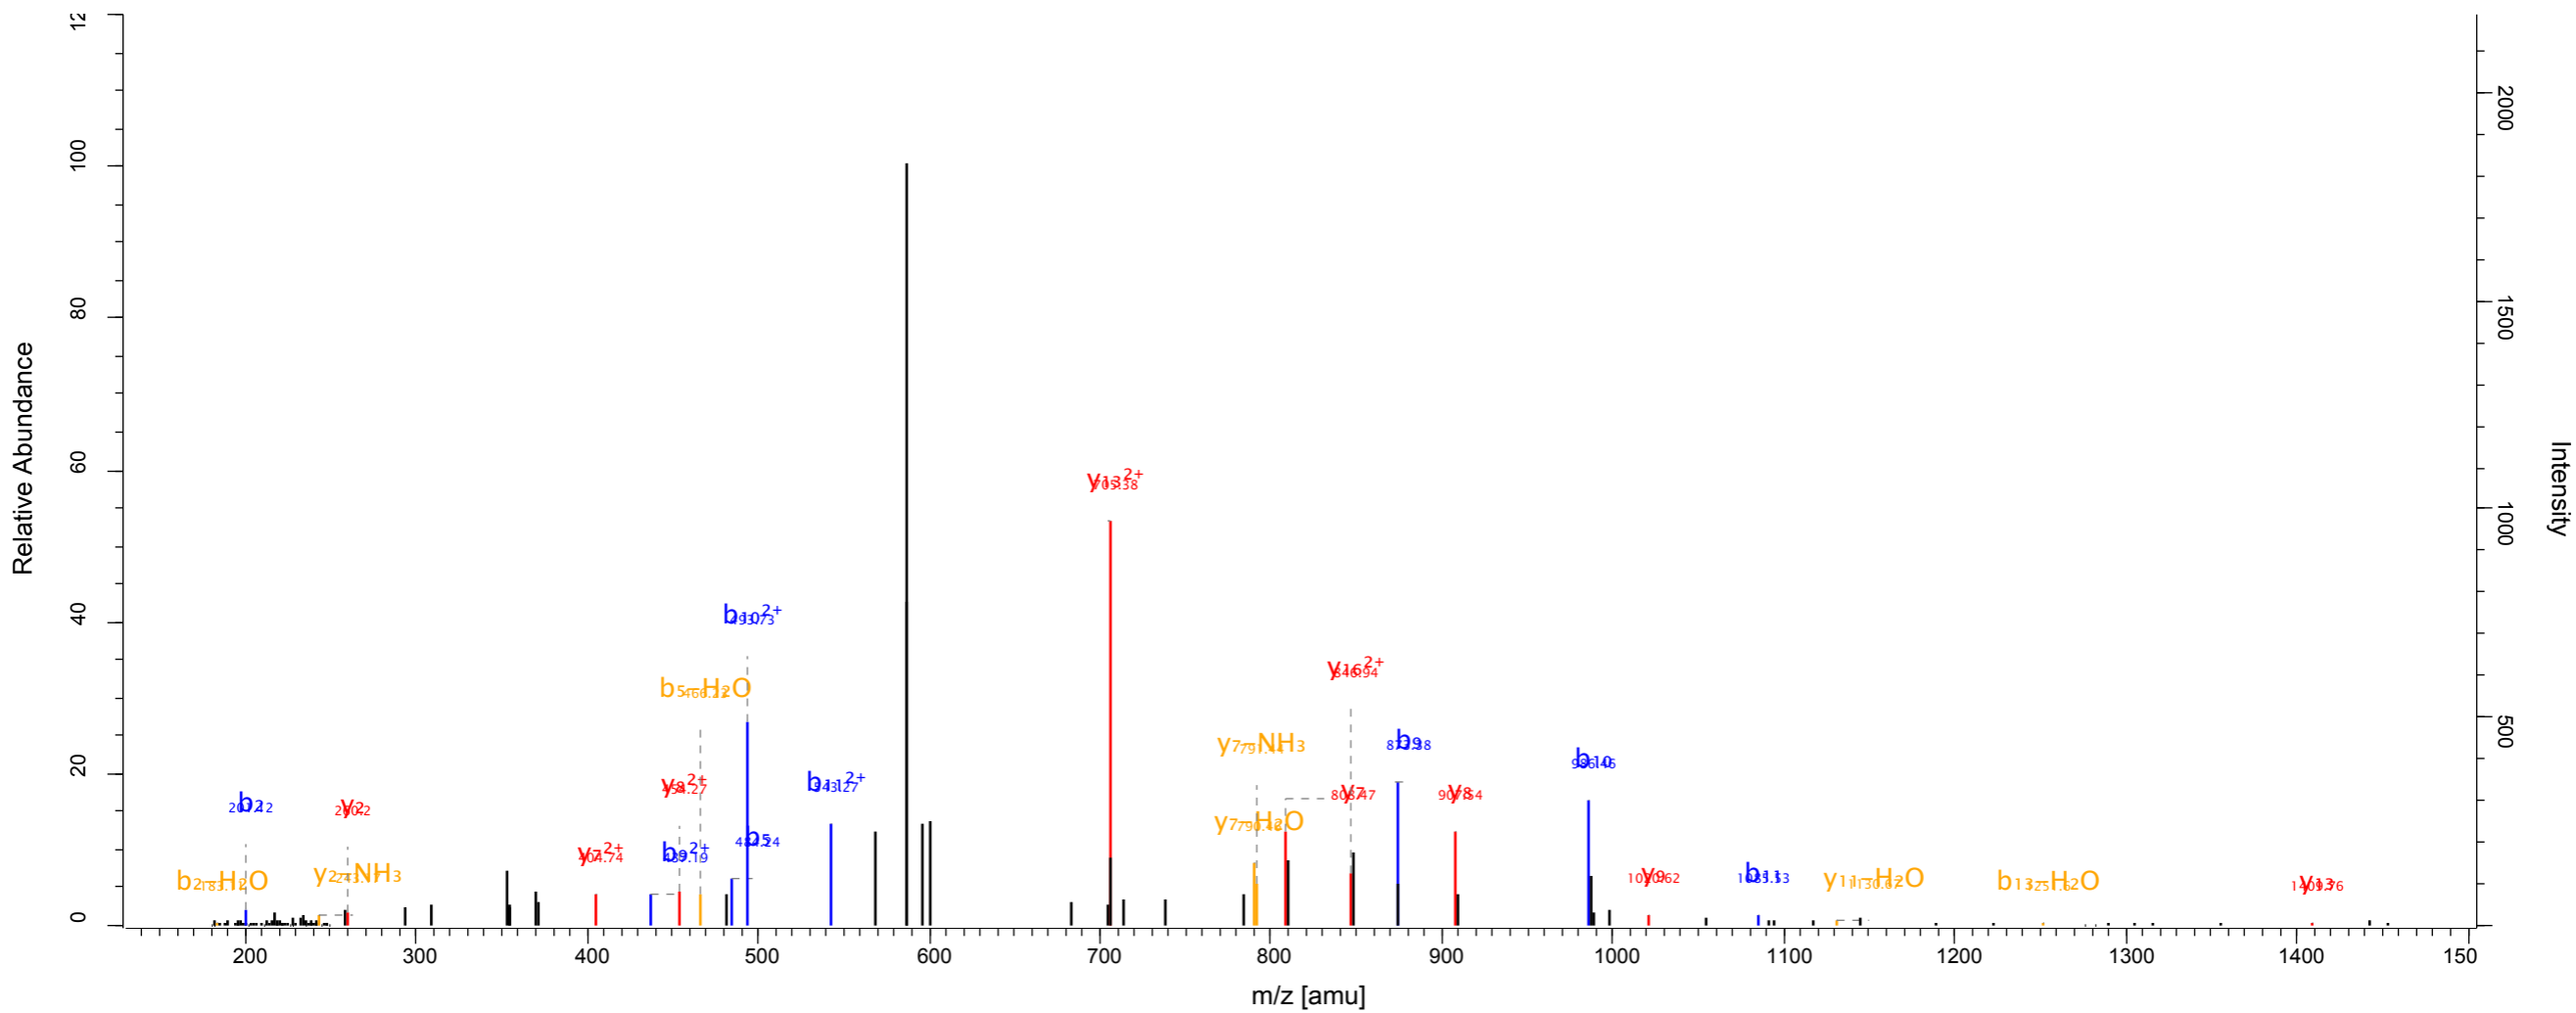

Scan number 4761 Raw file SKaraca\_LMB\_TCE\_Reverse\_281011\_21\_rep1  
 Method ITMS; CID Pepti... 85.57

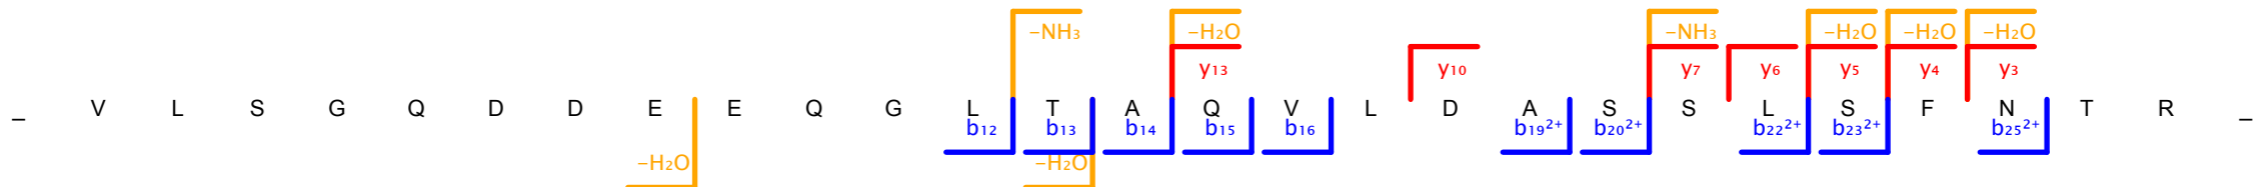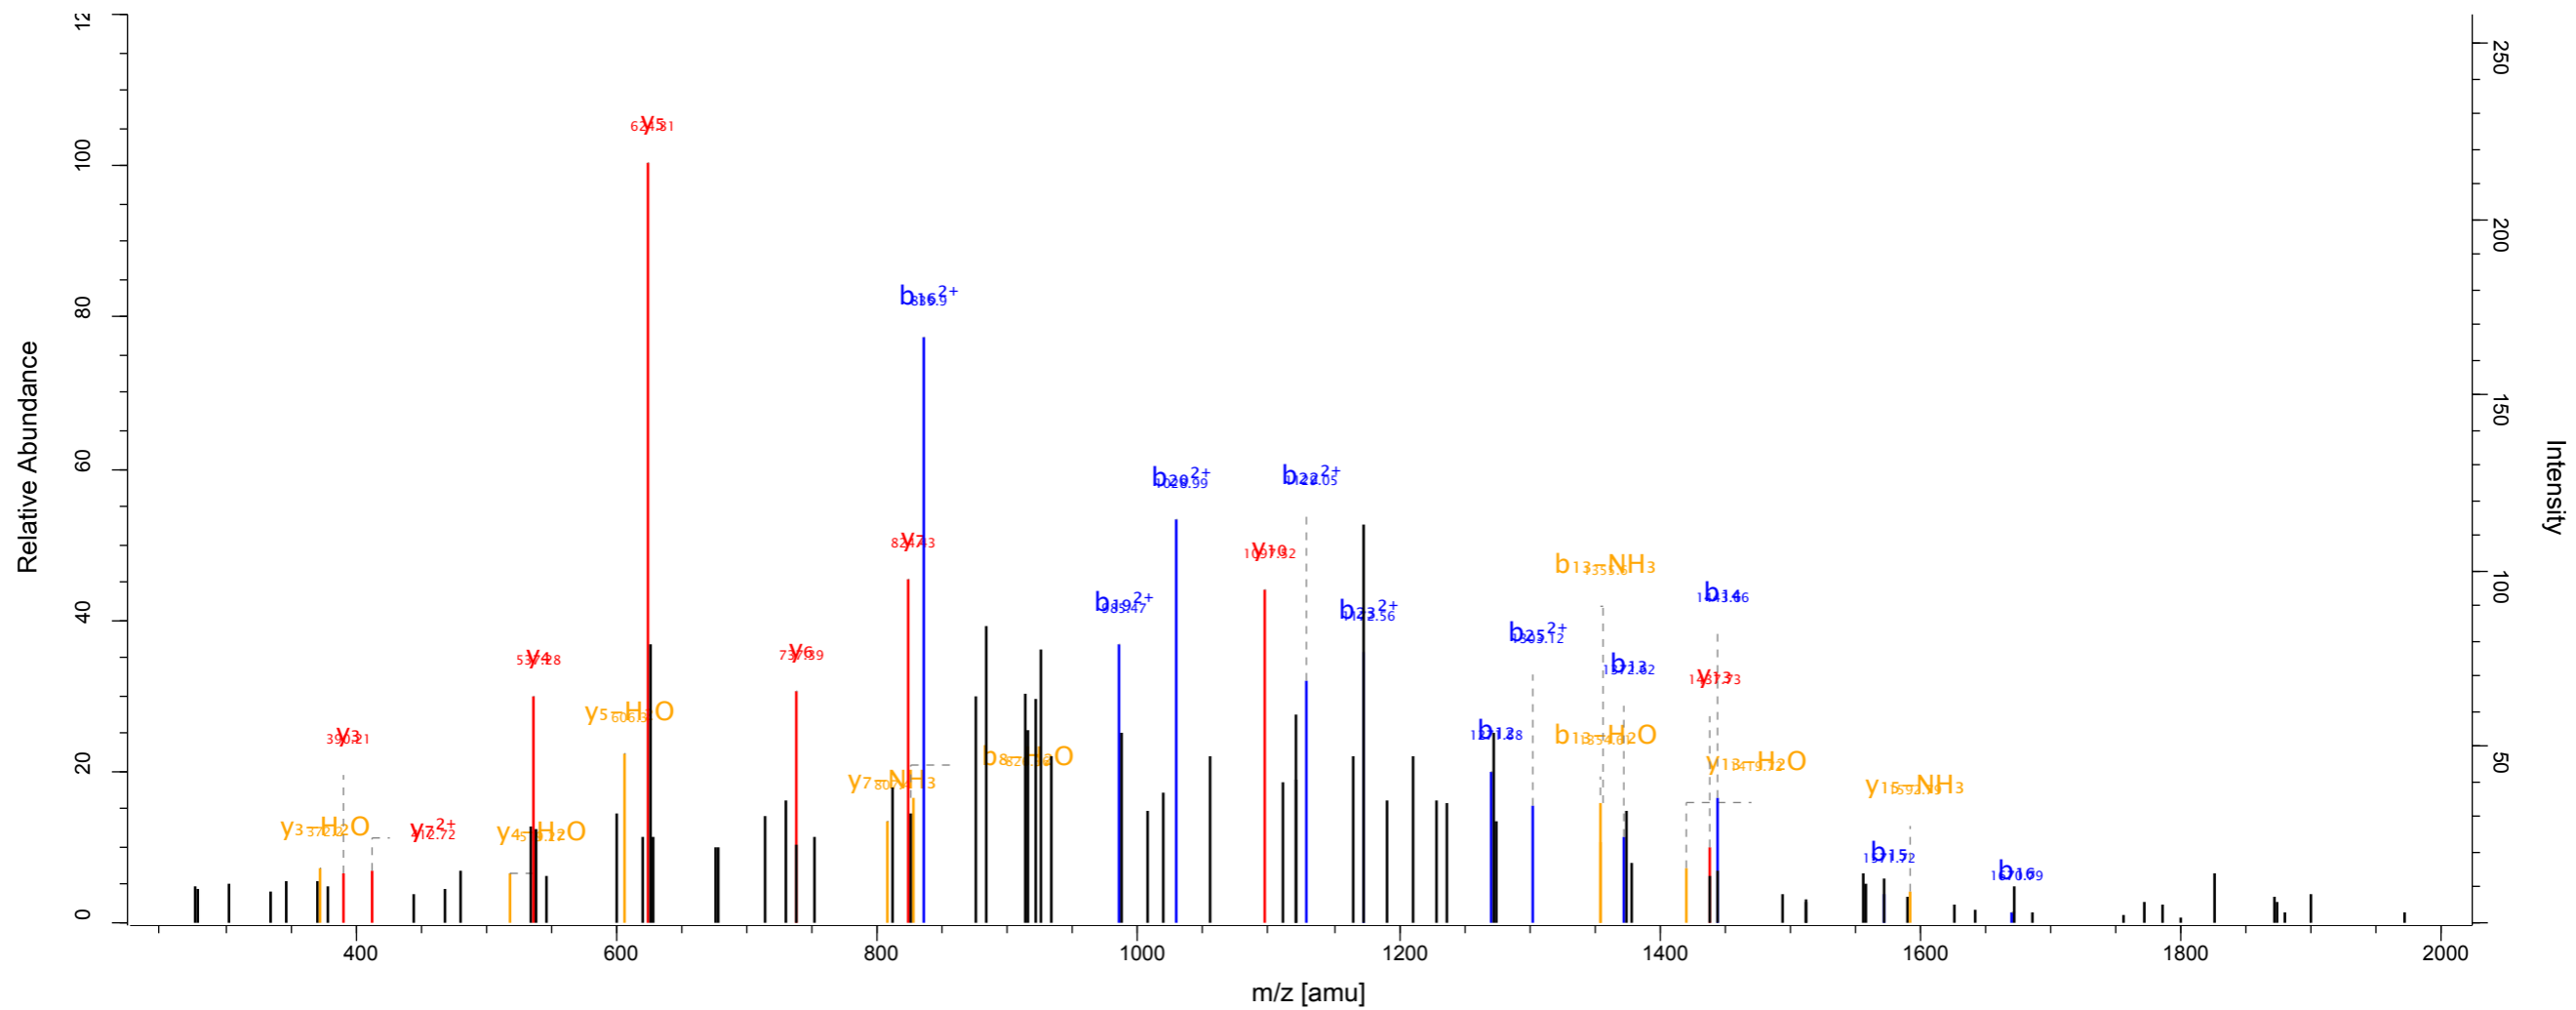

Scan number 5970 Raw file SKaraca\_LMB\_TCE\_Reverse\_281011\_21\_rep2  
 Method ITMS; CID Pepti... 129.12

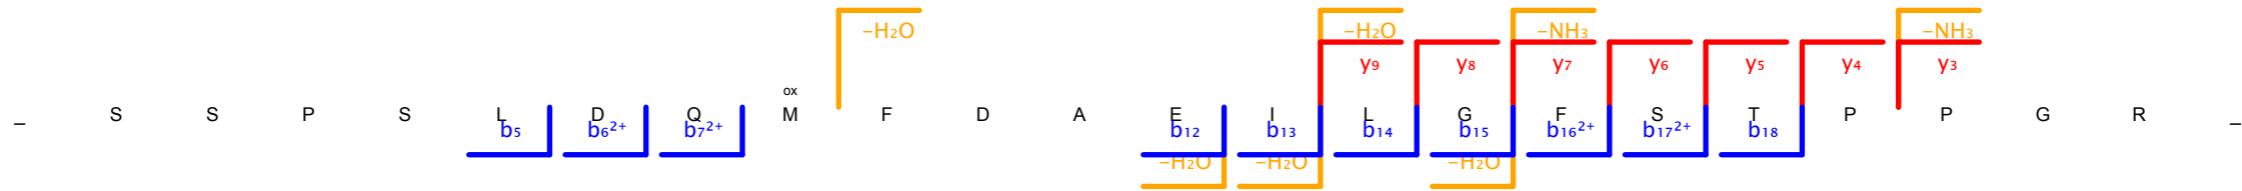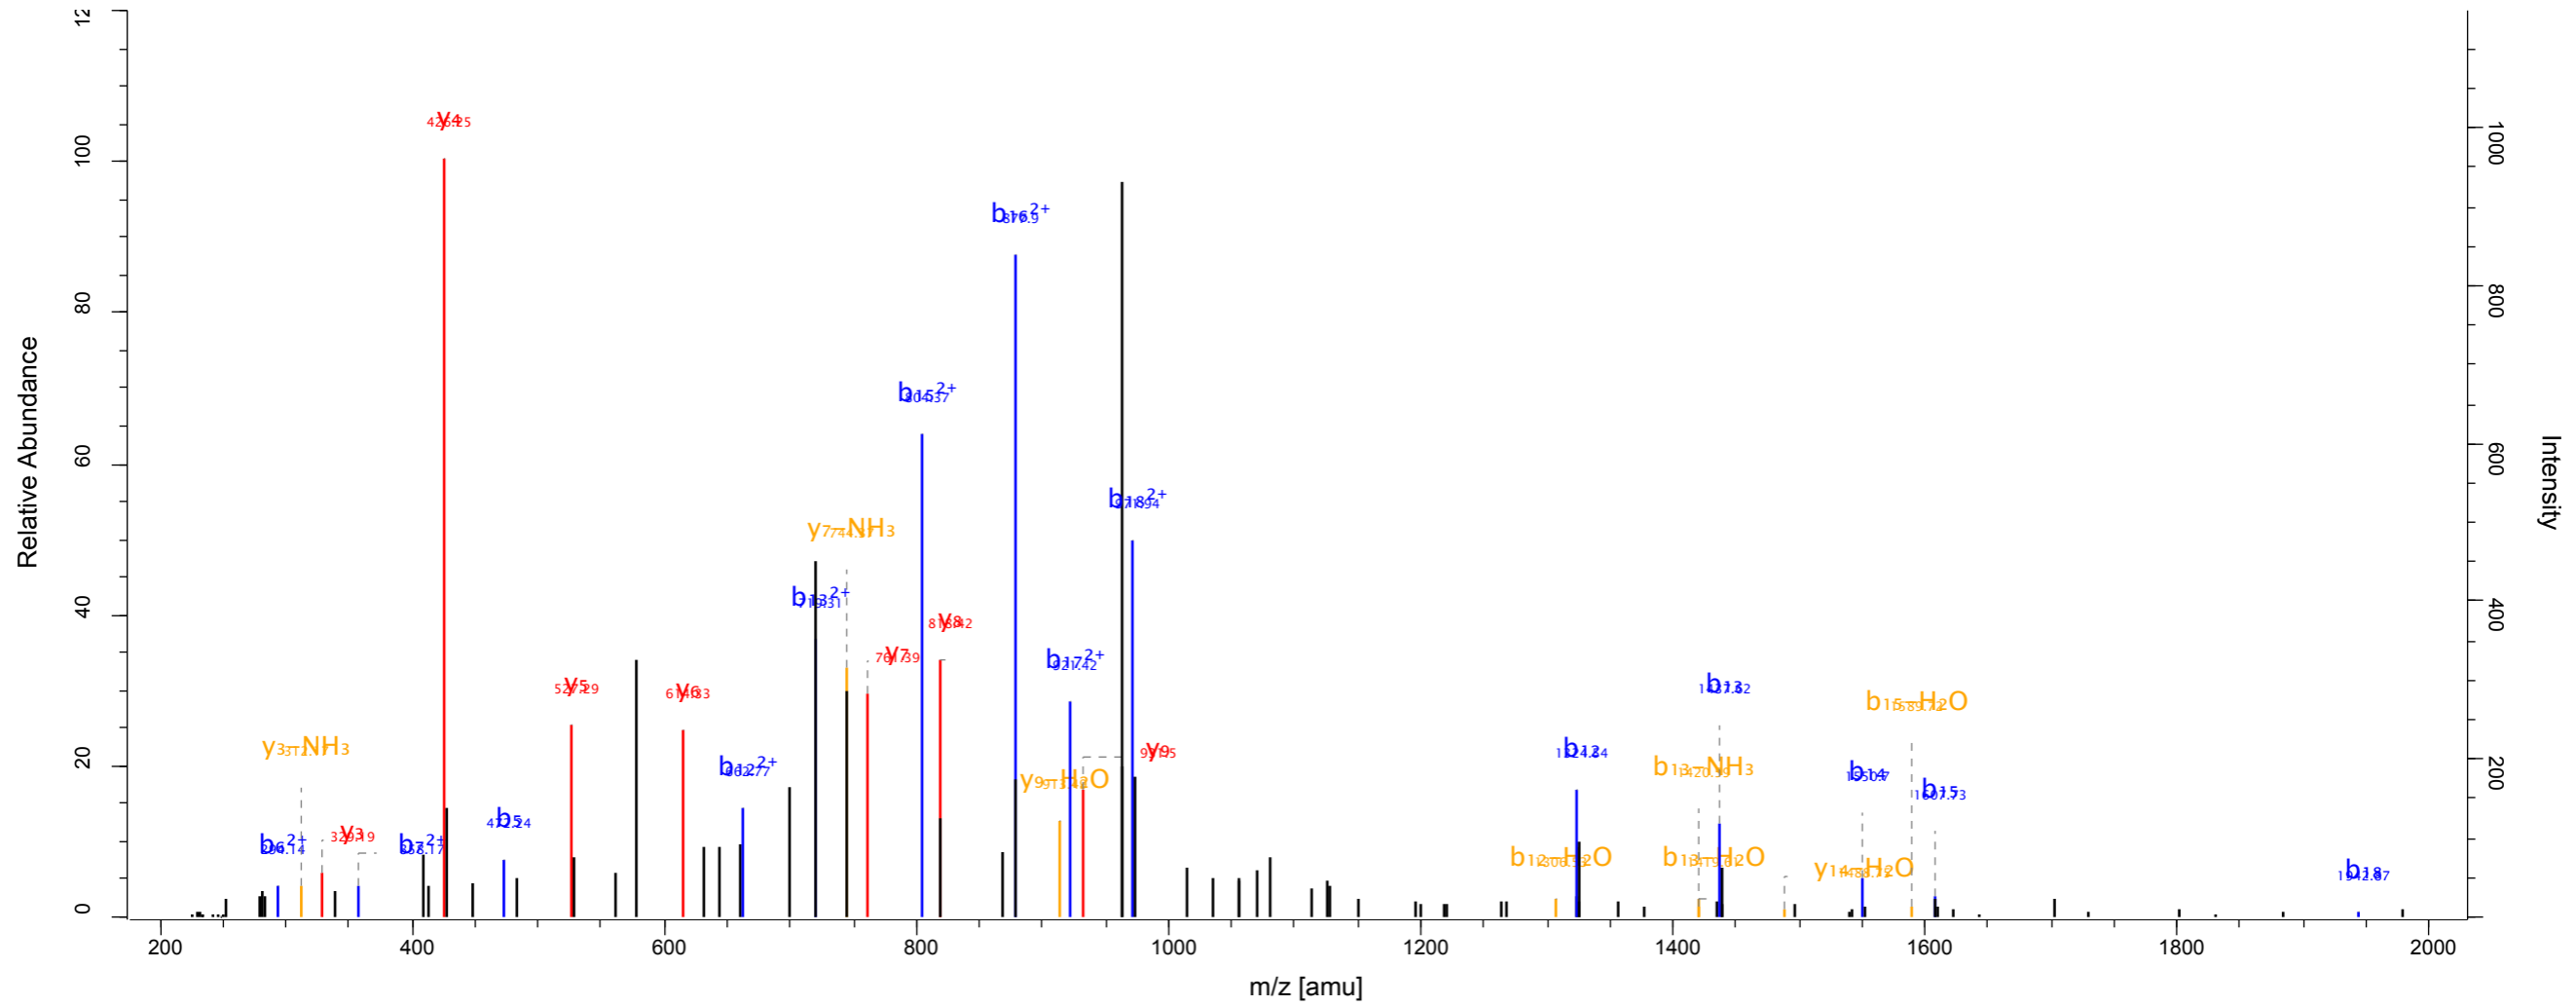

|             |           |          |                                        |
|-------------|-----------|----------|----------------------------------------|
| Scan number | 6530      | Raw file | SKaraca_LMB_TCE_Reverse_281011_21_rep2 |
| Method      | ITMS; CID | Pepti... | 133.81                                 |

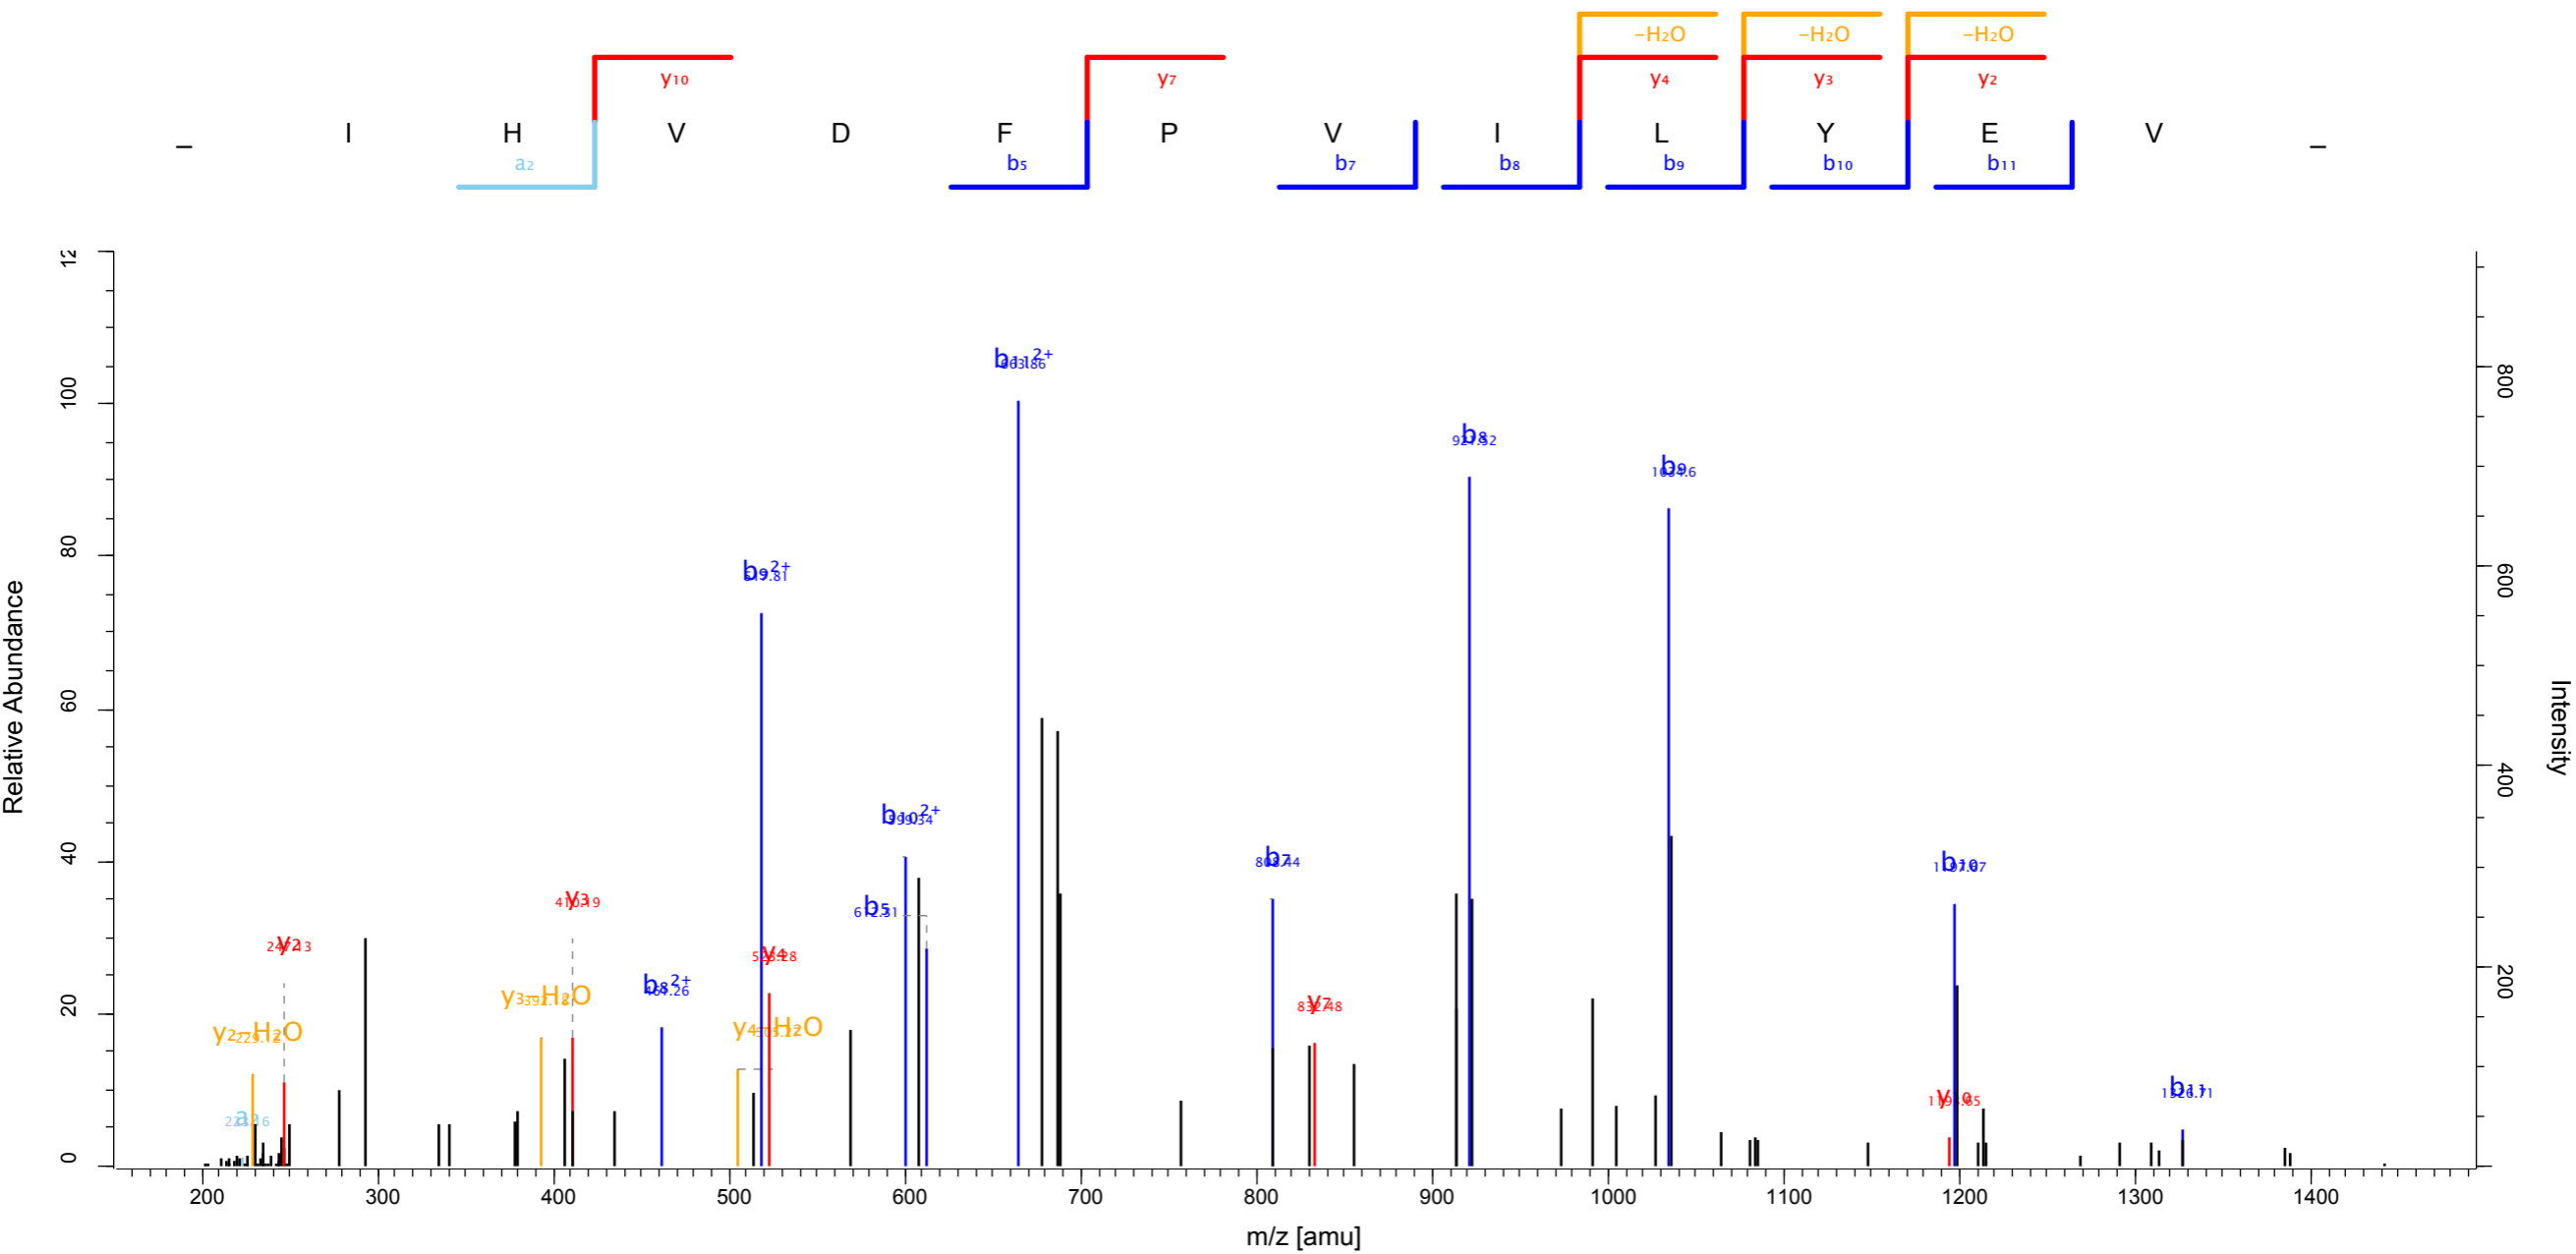

Scan number 4536 Raw file SKaraca\_LMB\_TCE\_Reverse\_281011\_21\_rep3  
Method ITMS; CID Pepti... 111.83

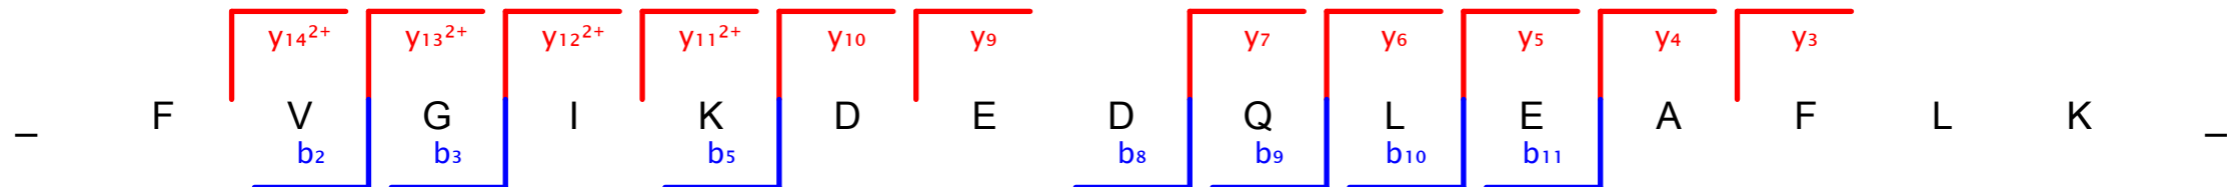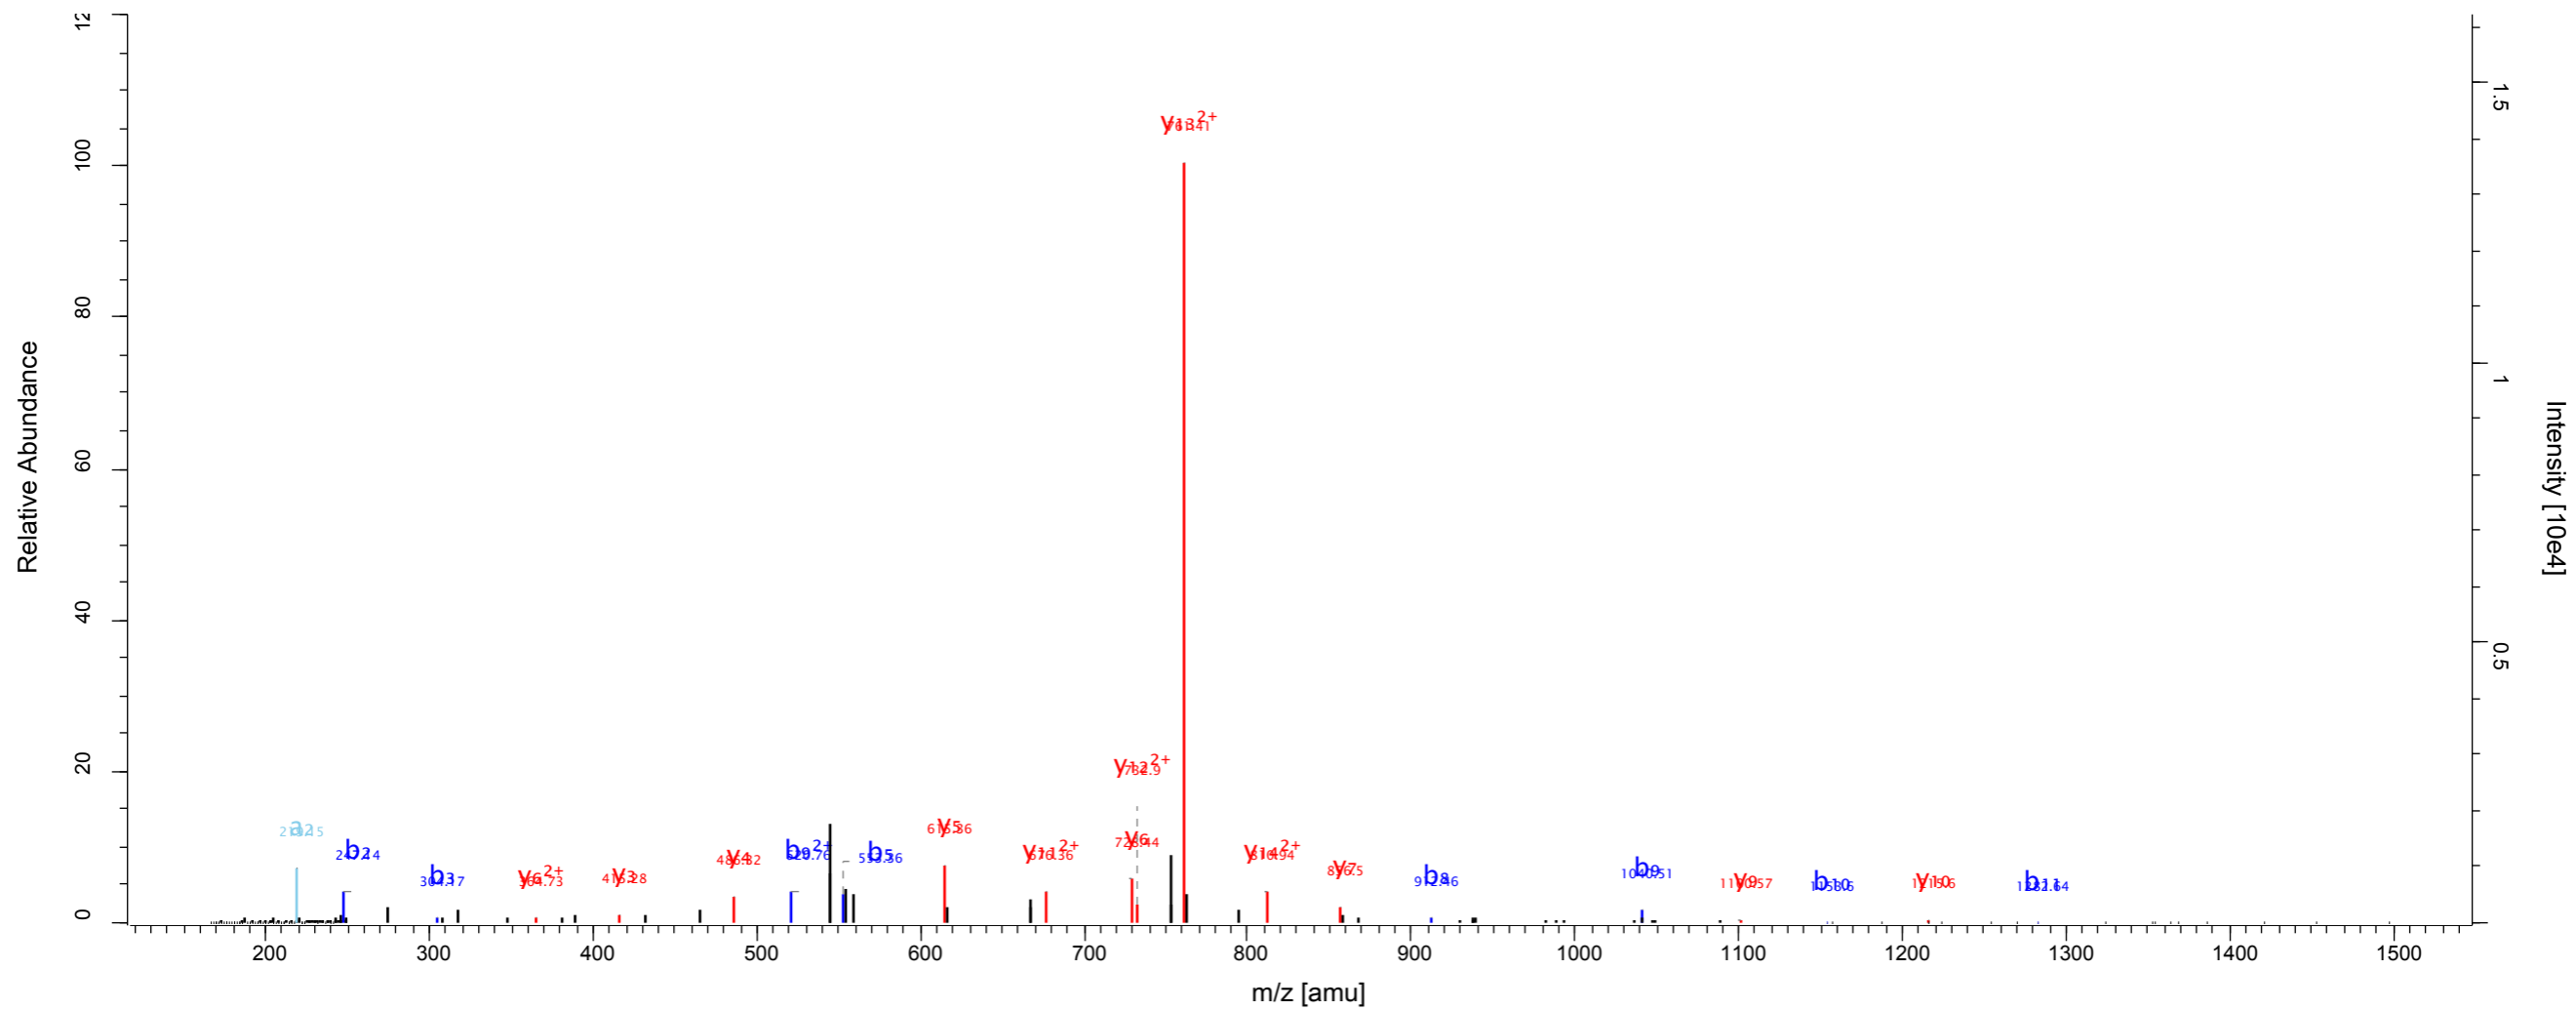



|             |           |          |                                        |
|-------------|-----------|----------|----------------------------------------|
| Scan number | 1312      | Raw file | SKaraca_LMB_TCE_Reverse_281011_22_rep2 |
| Method      | ITMS; CID | Pepti... | 123.76                                 |

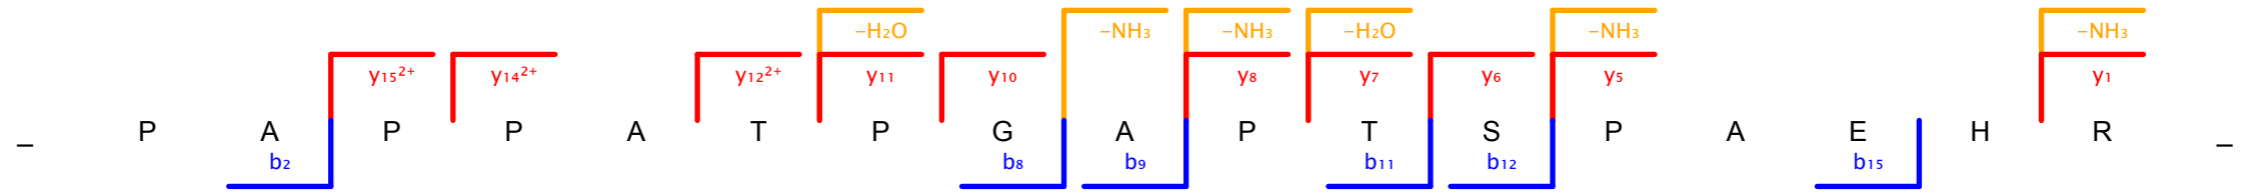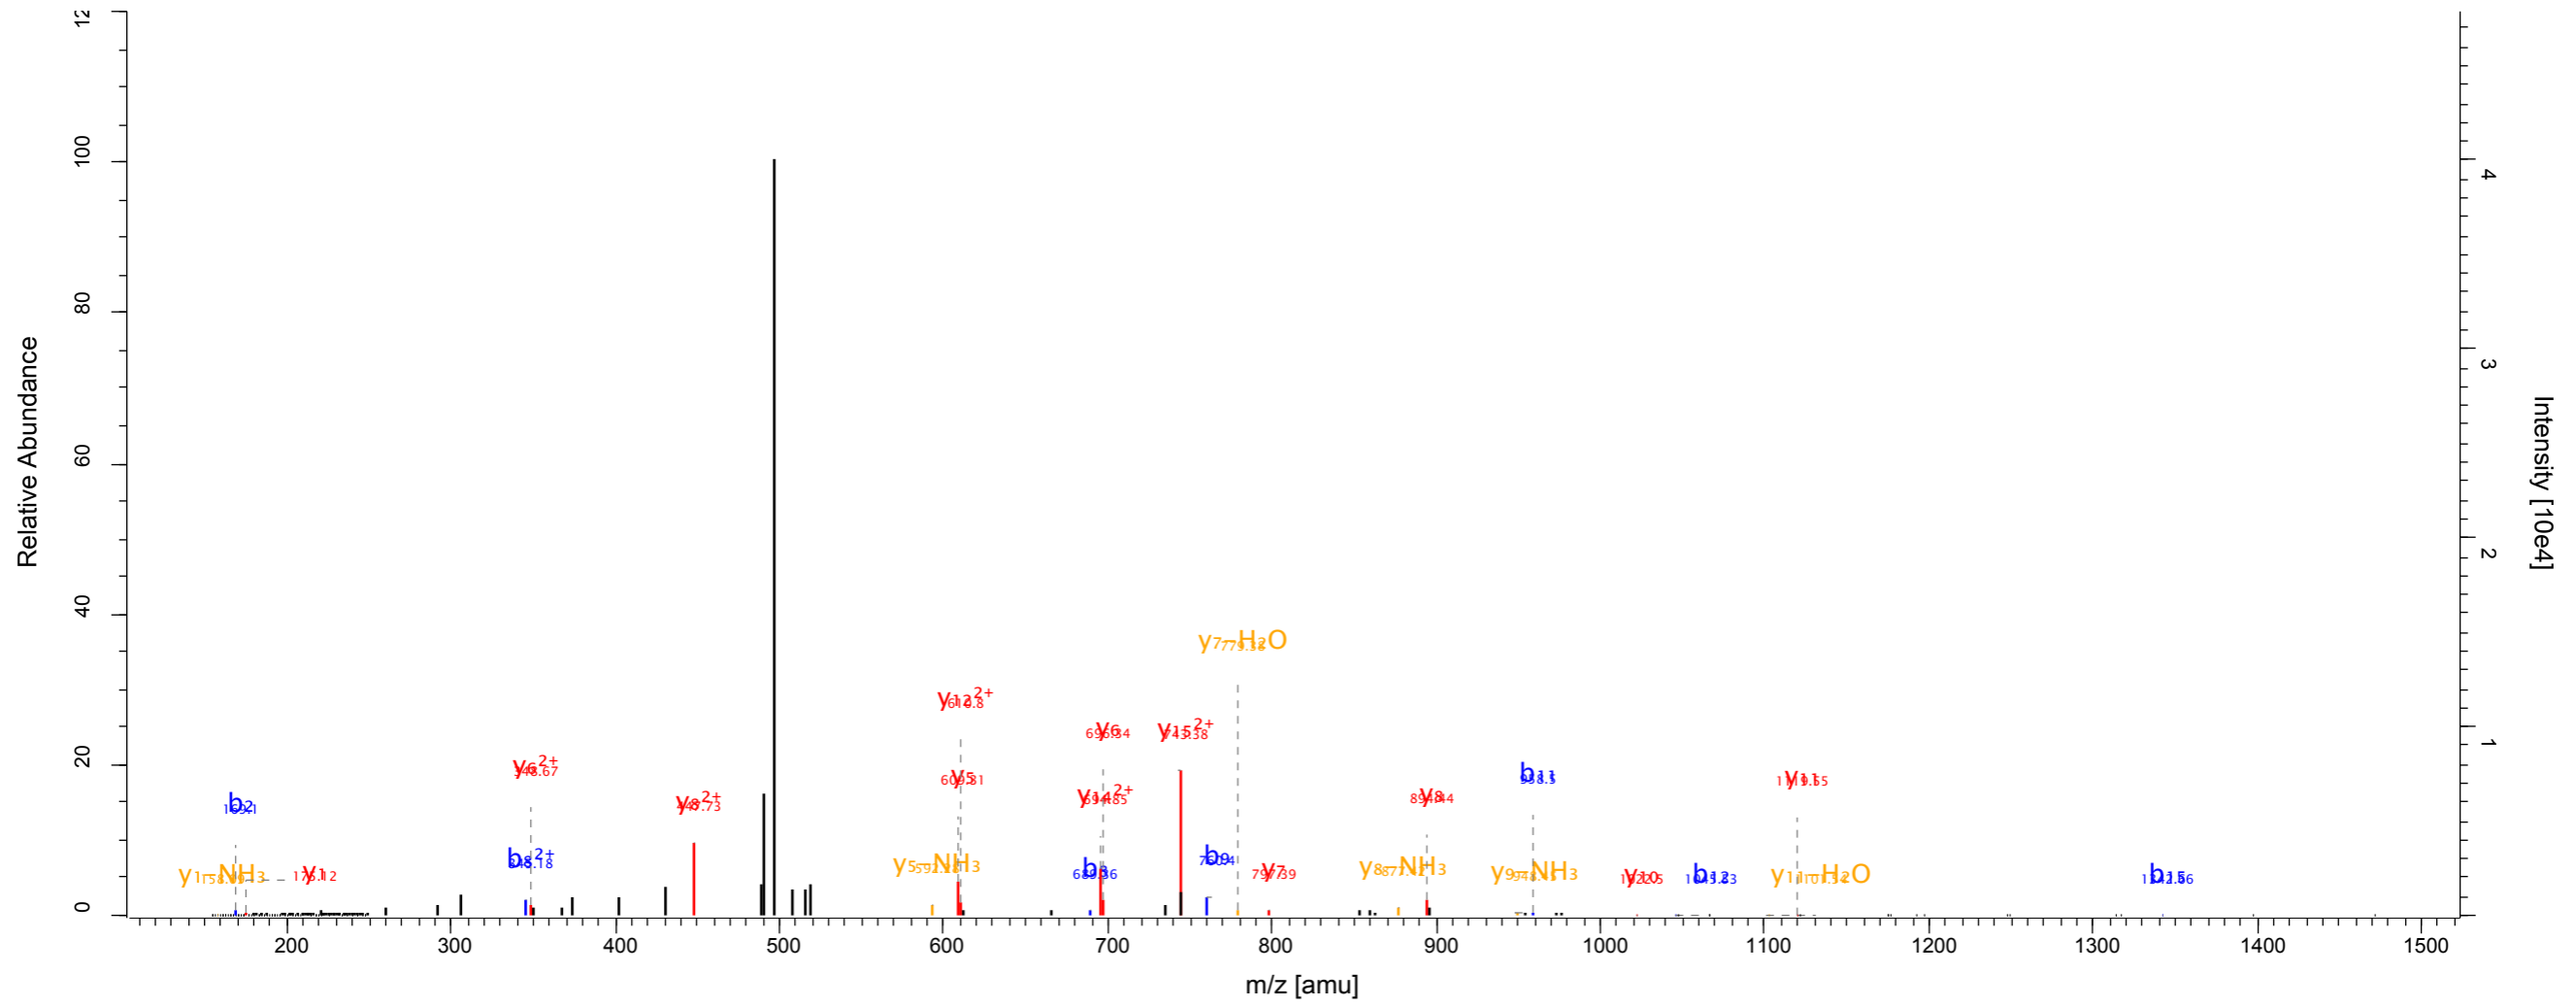

Scan number 1881 Raw file SKaraca\_LMB\_TCE\_Reverse\_281011\_22\_rep2  
 Method ITMS; CID Pepti... 229.97

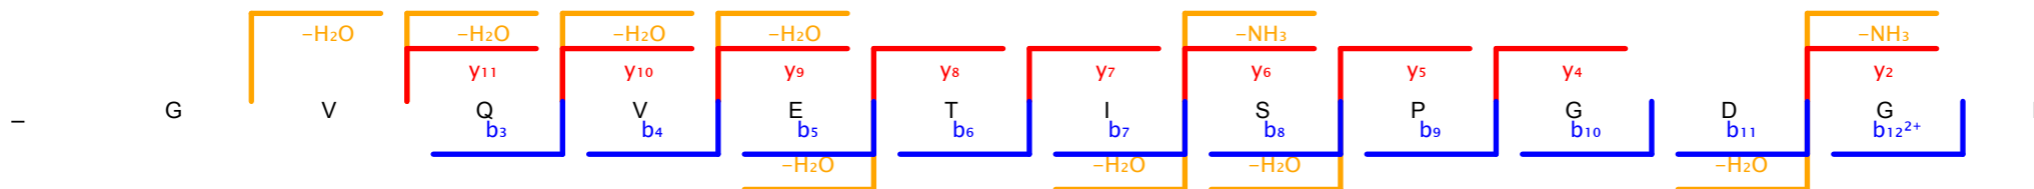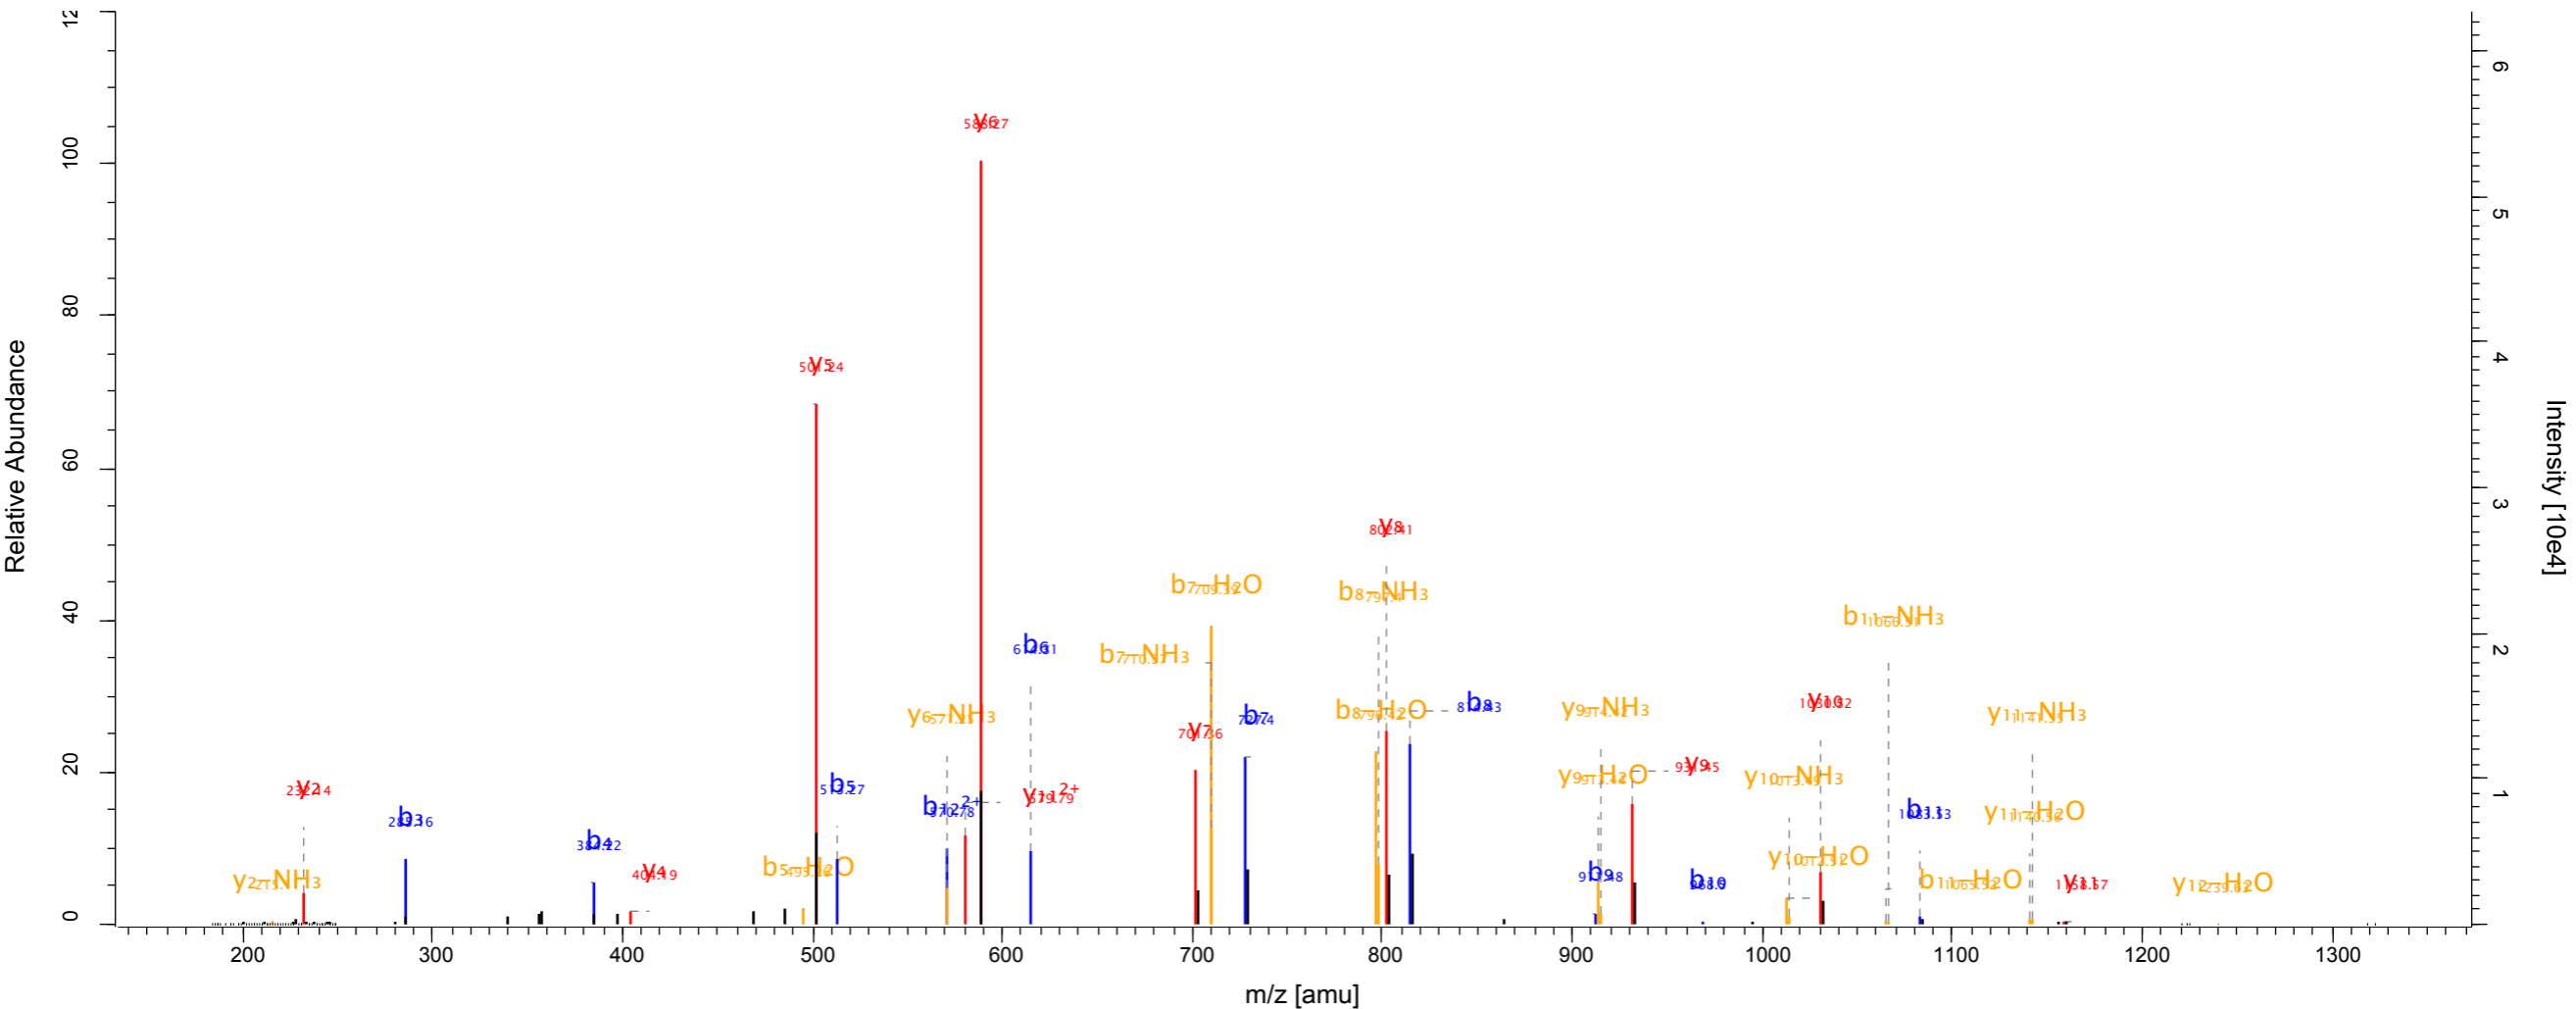

Scan number 2269 Raw file SKaraca\_LMB\_TCE\_Reverse\_281011\_23\_rep3  
 Method ITMS; CID Pepti... 171.32

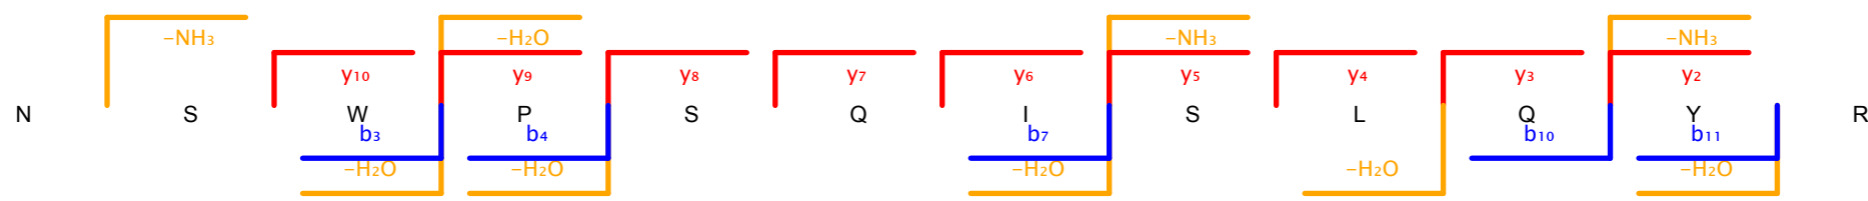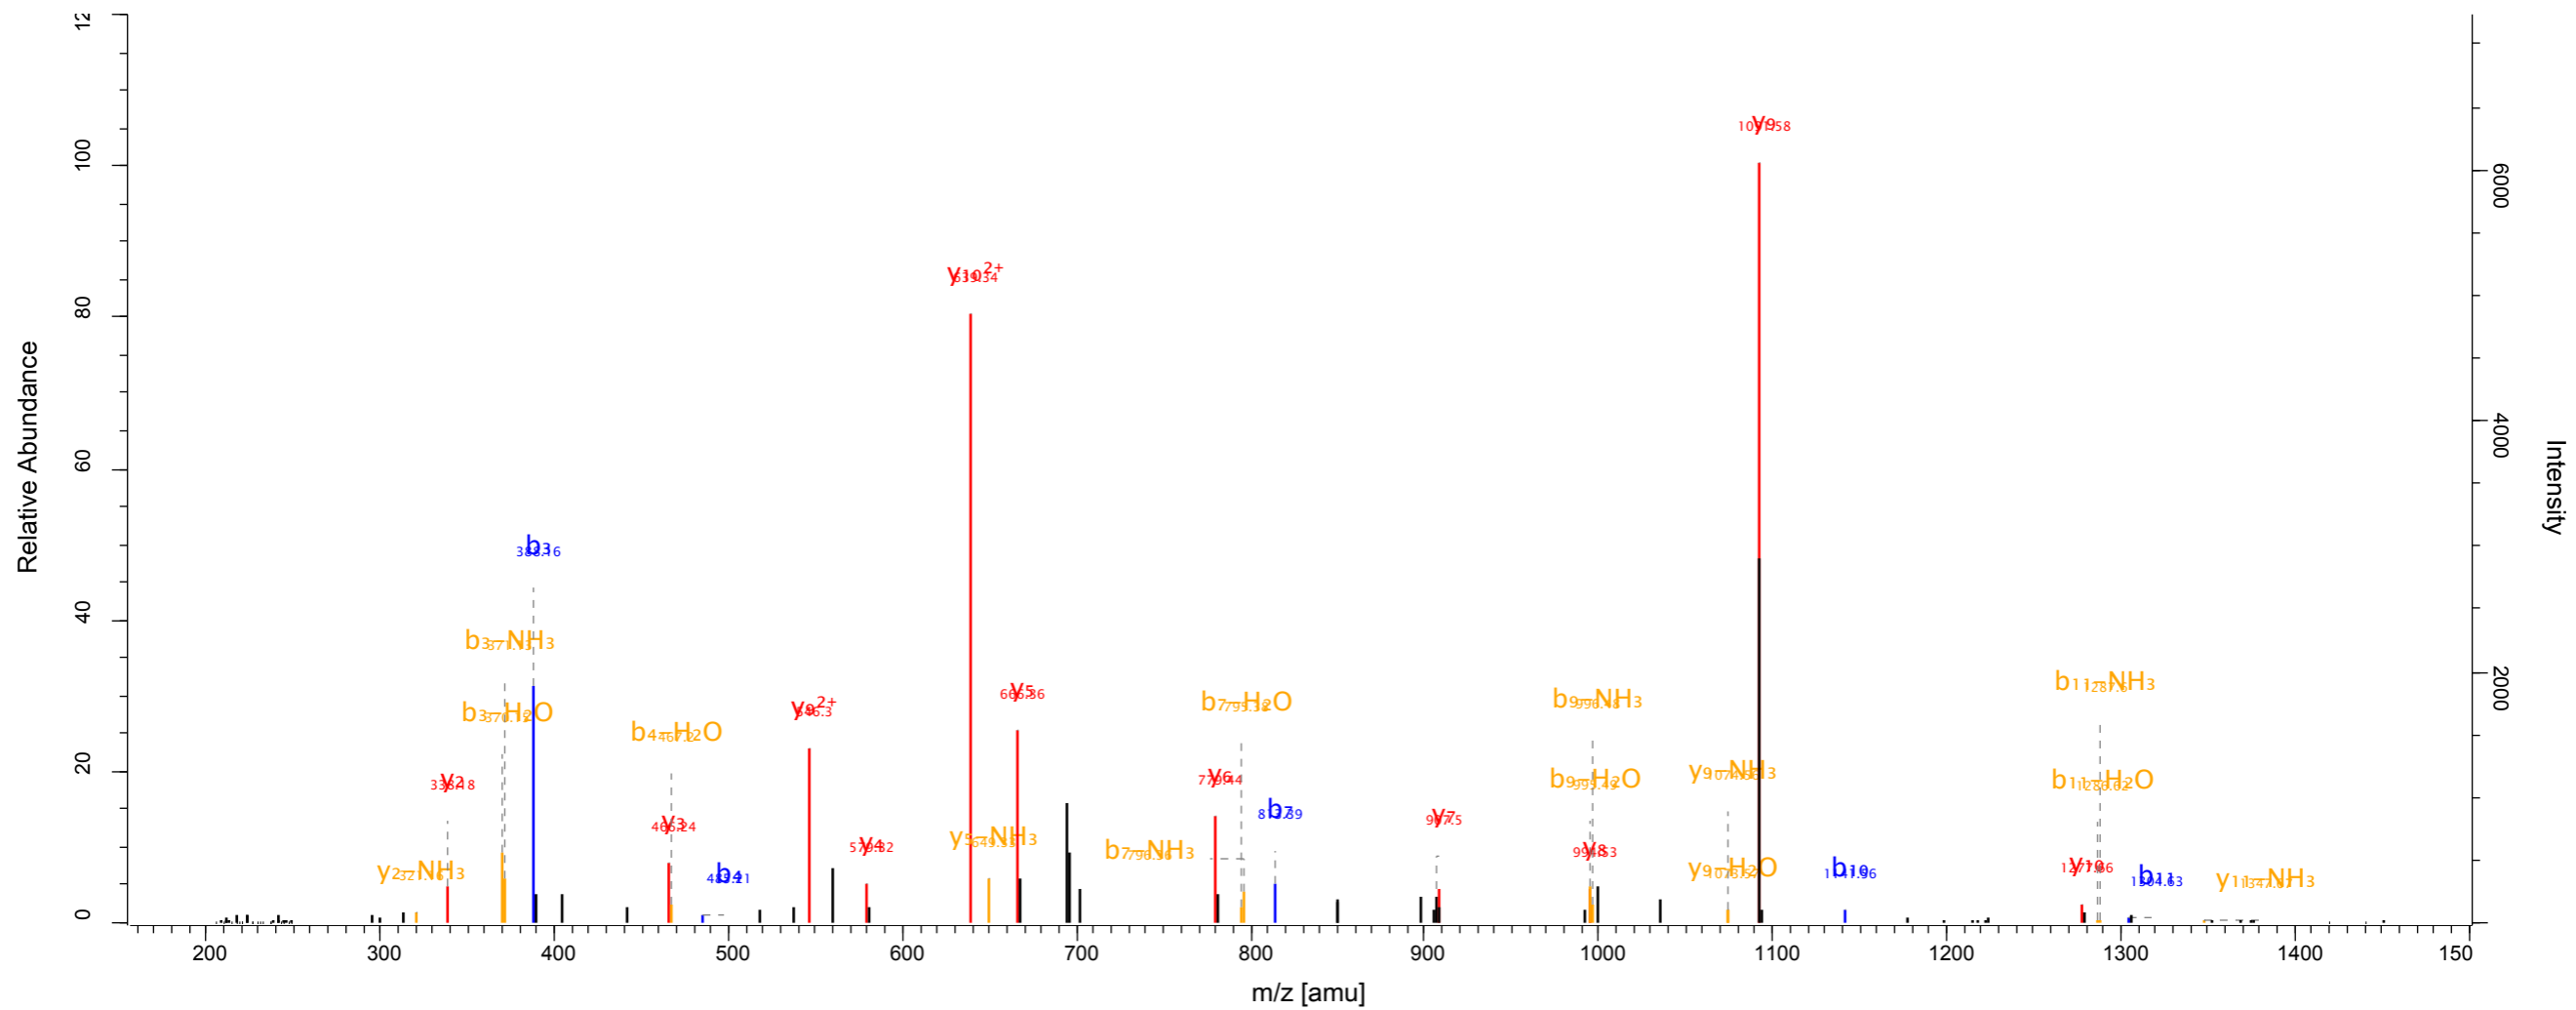

Supplement: supp_M112.024877_mcp.M112.024877-8.pdf [file supp_M112.024877_mcp.M112.024877-8.pdf]
