# Supplementary material
Source: PubMed Central journal article supplement (PMC3591659)
Supplement: supp_M112.024877_mcp.M112.024877-6.pdf [file supp_M112.024877_mcp.M112.024877-6.pdf]

Tables S1 (List of all identified proteins from three SILAC experiments) and S2 (List of all identified peptides from three SILAC experiments): large Excel-files, submitted separately

Table S3A:

List of 60S ribosomal complex proteins identified either as depleted from cytosol or enriched in nucleus or both, in HeLa cells in response to LMB-treatment.

| Protein ID  | 60S ribosomal complex protein | Gene Name | Behaviour | P-value    |
|-------------|-------------------------------|-----------|-----------|------------|
| IPI00550021 | L3                            | RPL3      | Acc.      | 9.53E-13   |
| IPI00220344 | L36a                          | RPL36A    | Acc.      | 2.22E-06   |
| IPI00215719 | L18                           | RPL18     | Acc.      | 1.12E-05   |
| IPI00555744 | L14                           | RPL14     | Acc.      | 2.62E-05   |
| IPI00003918 | L4                            | RPL4      | Acc.      | 0.00012162 |
| IPI00977661 | L17                           | RPL17     | Acc.      | 0.00028423 |
| IPI00012772 | L8                            | RPL8      | Acc.      | 0.0003441  |
| IPI00026202 | L18a                          | RPL18A    | Acc.      | 0.00035221 |
| IPI00376798 | L11                           | RPL11     | Acc.      | 0.00064352 |
| IPI00456758 | L27a                          | RPL27A    | Acc.      | 0.00066624 |
| IPI00790342 | L6                            | RPL6      | Acc.      | 0.00071045 |
| IPI00030179 | L7                            | RPL7      | Acc.      | 0.00072922 |
| IPI00219153 | L22                           | RPL22     | Acc.      | 0.0091367  |
| IPI00412579 | L10a                          | RPL10A    | Acc.      | 3.89E-05   |
| IPI00027270 | L26                           | RPL26     | Acc.      | 0.0013662  |
| IPI00031691 | L9                            | RPL9      | Acc.      | 0.0015339  |
| IPI00414860 | L37a                          | RPL37A    | Acc.      | 0.002027   |
| IPI00219156 | L30                           | RPL30     | Acc.      | 0.0021554  |
| IPI00304612 | L13a                          | RPL13A    | Acc.      | 0.00367    |
| IPI00927658 | L32                           | RPL32     | Acc.      | 0.0040289  |
| IPI00029731 | L35a                          | RPL35A    | Acc.      | 0.0045674  |
| IPI00947070 | L22-like 1                    | RPL22L1   | Dep.      | 0.0065763  |
| IPI00026302 | L31                           | RPL31     | Acc.      | 0.007363   |
| IPI00247583 | L21                           | RPL21     | Acc.      | 0.0077835  |
| IPI00219160 | L34                           | RPL34     | Acc.      | 0.0078394  |

Acc: accumulated in the nucleus of HeLa cells in response to LMB treatment

Table S3B:

List of COP9 signalosome complex proteins identified as depleted from cytosol of HeLa cells in response to LMB-treatment.

| Protein ID  | COP9 signalosome complex protein | Gene Name | Behaviour | P-value    |
|-------------|----------------------------------|-----------|-----------|------------|
| IPI00018813 | subunit 2                        | COPS2     | Dep.      | 0.0067943  |
| IPI00301419 | subunit 7a                       | COPS7A    | Dep.      | 0.0044831  |
| IPI00414289 | subunit 1                        | GPS1      | Dep.      | 0.0024419  |
| IPI00171844 | subunit 4                        | COPS4     | Dep.      | 0.0022753  |
| IPI00163230 | subunit 6                        | COPS6     | Dep.      | 0.0017123  |
| IPI00009958 | subunit 5                        | COPS5     | Dep.      | 0.0011685  |
| IPI00009480 | subunit 8                        | COPS8     | Dep.      | 0.00044628 |

Dep: depleted from the cytosol of HeLa cells in response to LMB treatment
