# Supplementary material
Source: PubMed Central journal article supplement (PMC3591659)

Fig. S2

A

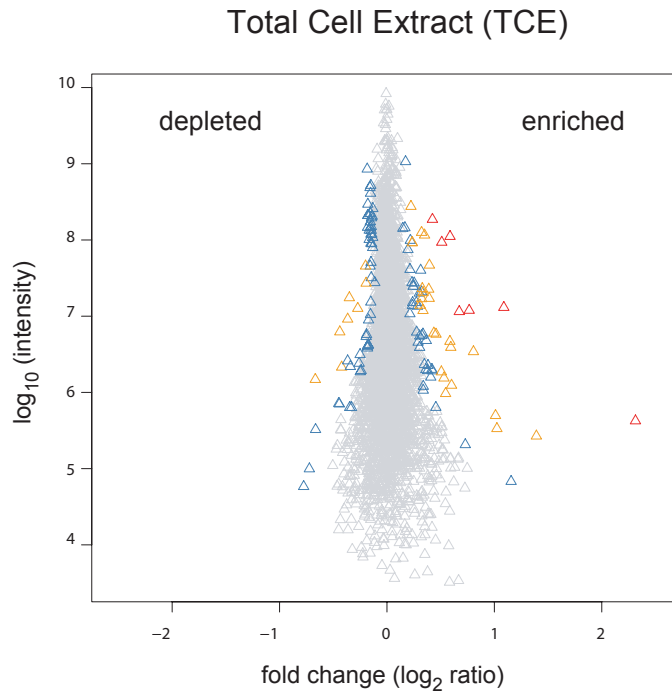

B

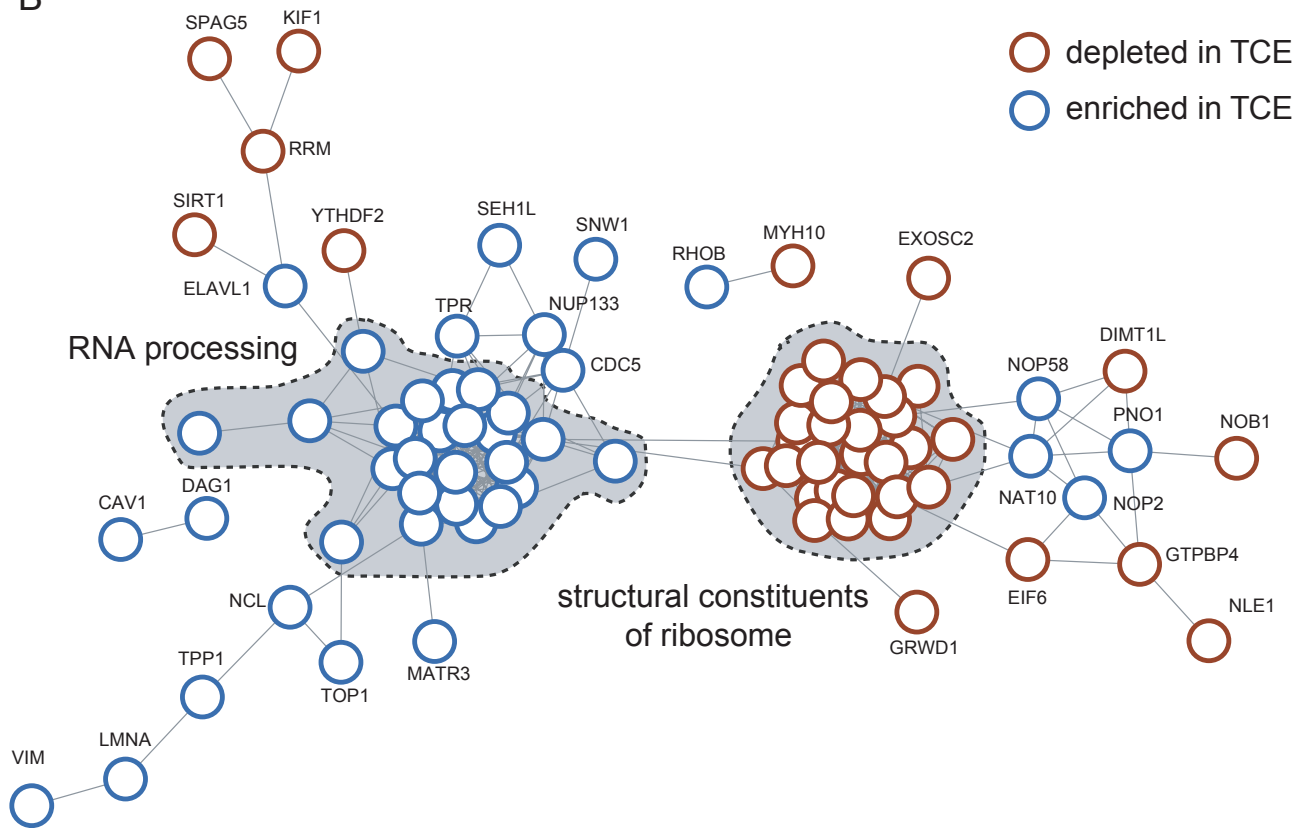

Supplement: supp_M112.024877_mcp.M112.024877-2.pdf [file supp_M112.024877_mcp.M112.024877-2.pdf]

Fig. S3

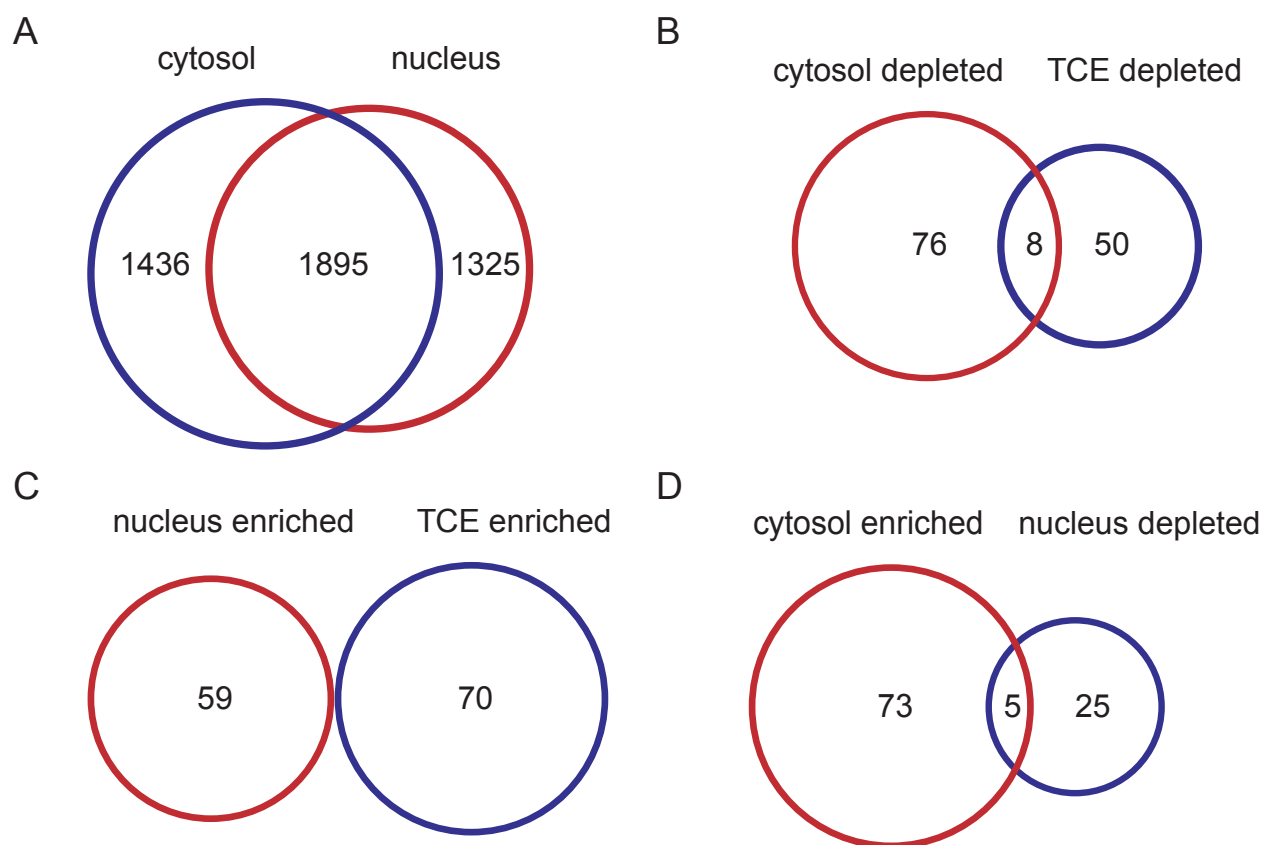

Supplement: supp_M112.024877_mcp.M112.024877-3.pdf [file supp_M112.024877_mcp.M112.024877-3.pdf]
